# Supplementary material
Source: MDPI journal article supplement (https://www.mdpi.com/2073-4352/13/3/535)

## checkCIF/PLATON report

Structure factors have been supplied for datablock(s) Cu-Gd-valen-dca

THIS REPORT IS FOR GUIDANCE ONLY. IF USED AS PART OF A REVIEW PROCEDURE FOR PUBLICATION, IT SHOULD NOT REPLACE THE EXPERTISE OF AN EXPERIENCED CRYSTALLOGRAPHIC REFEREE.

No syntax errors found.      CIF dictionary      Interpreting this report

### Datablock: Cu-Gd-valen-dca

---

|                        |                         |                                    |
|------------------------|-------------------------|------------------------------------|
| Bond precision:        | C-C = 0.0151 Å          | Wavelength=0.71073                 |
| Cell:                  | a=8.8191 (7)            | b=16.5598 (14)      c=20.0787 (18) |
|                        | alpha=90                | beta=91.748 (2)      gamma=90      |
| Temperature:           | 298 K                   |                                    |
|                        | Calculated              | Reported                           |
| Volume                 | 2931.0 (4)              | 2931.0 (4)                         |
| Space group            | P 21/n                  | P 21/n                             |
| Hall group             | -P 2yn                  | -P 2yn                             |
| Moiety formula         | C22 H28 Cl Cu Gd N6 O10 | C22 H28 Cl Cu Gd N6 O10            |
| Sum formula            | C22 H28 Cl Cu Gd N6 O10 | C22 H28 Cl Cu Gd N6 O10            |
| Mr                     | 792.75                  | 792.74                             |
| Dx, g cm <sup>-3</sup> | 1.796                   | 1.797                              |
| Z                      | 4                       | 4                                  |
| Mu (mm <sup>-1</sup> ) | 3.121                   | 3.121                              |
| F000                   | 1568.0                  | 1568.0                             |
| F000'                  | 1569.81                 |                                    |
| h, k, lmax             | 10, 19, 23              | 10, 19, 23                         |
| Nref                   | 5174                    | 5137                               |
| Tmin, Tmax             | 0.255, 0.305            | 0.255, 0.305                       |
| Tmin'                  | 0.236                   |                                    |

Correction method= # Reported T Limits: Tmin=0.255 Tmax=0.305  
AbsCorr = MULTI-SCAN

Data completeness= 0.993      Theta(max)= 25.010

|                                |                                  |
|--------------------------------|----------------------------------|
| R(reflections)= 0.0822 ( 2559) | wR2(reflections)= 0.2086 ( 5137) |
| S = 0.788                      | Npar= 346                        |

---

The following ALERTS were generated. Each ALERT has the format

**test-name\_ALERT\_alert-type\_alert-level.**

Click on the hyperlinks for more details of the test.

---

### Alert level B

PLAT973\_ALERT\_2\_B Check Calcd Positive Resid. Density on Gd1 1.83 eA-3

**Author Response: Gd1 is a heavy atom and this alert is often found for molecules of this type.**

---

### Alert level C

GOODF01\_ALERT\_2\_C The least squares goodness of fit parameter lies outside the range 0.80 <> 2.00

Goodness of fit given = 0.788

RINTA01\_ALERT\_3\_C The value of Rint is greater than 0.12

Rint given 0.176

|                   |                                                  |               |
|-------------------|--------------------------------------------------|---------------|
| PLAT018_ALERT_1_C | _diffn_measured_fraction_theta_max .NE. *_full   | ! Check       |
| PLAT020_ALERT_3_C | The Value of Rint is Greater Than 0.12 .....     | 0.176 Report  |
| PLAT213_ALERT_2_C | Atom O7 has ADP max/min Ratio .....              | 3.1 oblate    |
| PLAT234_ALERT_4_C | Large Hirshfeld Difference O4 --C18 .            | 0.20 Ang.     |
| PLAT234_ALERT_4_C | Large Hirshfeld Difference O6 --N3 .             | 0.18 Ang.     |
| PLAT234_ALERT_4_C | Large Hirshfeld Difference C10 --C11 .           | 0.20 Ang.     |
| PLAT241_ALERT_2_C | High 'MainMol' Ueq as Compared to Neighbors of   | N5 Check      |
| PLAT242_ALERT_2_C | Low 'MainMol' Ueq as Compared to Neighbors of    | C19 Check     |
| PLAT242_ALERT_2_C | Low 'MainMol' Ueq as Compared to Neighbors of    | C20 Check     |
| PLAT342_ALERT_3_C | Low Bond Precision on C-C Bonds .....            | 0.01507 Ang.  |
| PLAT905_ALERT_3_C | Negative K value in the Analysis of Variance ... | -0.122 Report |
| PLAT910_ALERT_3_C | Missing # of FCF Reflection(s) Below Theta(Min). | 5 Note        |
| PLAT911_ALERT_3_C | Missing FCF Refl Between Thmin & STh/L= 0.595    | 33 Report     |
| PLAT971_ALERT_2_C | Check Calcd Resid. Dens. 1.12Ang From Gd1        | 2.05 eA-3     |
| PLAT971_ALERT_2_C | Check Calcd Resid. Dens. 1.05Ang From Gd1        | 2.04 eA-3     |
| PLAT971_ALERT_2_C | Check Calcd Resid. Dens. 1.05Ang From Gd1        | 1.89 eA-3     |
| PLAT975_ALERT_2_C | Check Calcd Resid. Dens. 0.94Ang From O1 .       | 0.75 eA-3     |
| PLAT977_ALERT_2_C | Check Negative Difference Density on H18C .      | -0.35 eA-3    |

---

### Alert level G

|                   |                                                  |              |
|-------------------|--------------------------------------------------|--------------|
| PLAT003_ALERT_2_G | Number of Uiso or Uij Restrained non-H Atoms ... | 1 Report     |
| PLAT007_ALERT_5_G | Number of Unrefined Donor-H Atoms .....          | 4 Report     |
| PLAT066_ALERT_1_G | Predicted and Reported Tmin&Tmax Range Identical | ? Check      |
| PLAT083_ALERT_2_G | SHELXL Second Parameter in WGHT Unusually Large  | 150.00 Why ? |
| PLAT186_ALERT_4_G | The CIF-Embedded .res File Contains ISOR Records | 1 Report     |
| PLAT794_ALERT_5_G | Tentative Bond Valency for Cu1 (II) .            | 2.35 Info    |
| PLAT860_ALERT_3_G | Number of Least-Squares Restraints .....         | 6 Note       |
| PLAT883_ALERT_1_G | No Info/Value for _atom_sites_solution_primary . | Please Do !  |
| PLAT933_ALERT_2_G | Number of HKL-OMIT Records in Embedded .res File | 15 Note      |
| PLAT941_ALERT_3_G | Average HKL Measurement Multiplicity .....       | 2.7 Low      |
| PLAT965_ALERT_2_G | The SHELXL WEIGHT Optimisation has not Converged | Please Check |
| PLAT967_ALERT_5_G | Note: Two-Theta Cutoff Value in Embedded .res .. | 50.0 Degree  |
| PLAT978_ALERT_2_G | Number C-C Bonds with Positive Residual Density. | 0 Info       |

---

0 **ALERT level A** = Most likely a serious problem - resolve or explain  
1 **ALERT level B** = A potentially serious problem, consider carefully  
20 **ALERT level C** = Check. Ensure it is not caused by an omission or oversight  
13 **ALERT level G** = General information/check it is not something unexpected

3 ALERT type 1 CIF construction/syntax error, inconsistent or missing data  
16 ALERT type 2 Indicator that the structure model may be wrong or deficient  
8 ALERT type 3 Indicator that the structure quality may be low  
4 ALERT type 4 Improvement, methodology, query or suggestion  
3 ALERT type 5 Informative message, check

---

It is advisable to attempt to resolve as many as possible of the alerts in all categories. Often the minor alerts point to easily fixed oversights, errors and omissions in your CIF or refinement strategy, so attention to these fine details can be worthwhile. In order to resolve some of the more serious problems it may be necessary to carry out additional measurements or structure refinements. However, the purpose of your study may justify the reported deviations and the more serious of these should normally be commented upon in the discussion or experimental section of a paper or in the "special\_details" fields of the CIF. checkCIF was carefully designed to identify outliers and unusual parameters, but every test has its limitations and alerts that are not important in a particular case may appear. Conversely, the absence of alerts does not guarantee there are no aspects of the results needing attention. It is up to the individual to critically assess their own results and, if necessary, seek expert advice.

### **Publication of your CIF in IUCr journals**

A basic structural check has been run on your CIF. These basic checks will be run on all CIFs submitted for publication in IUCr journals (*Acta Crystallographica*, *Journal of Applied Crystallography*, *Journal of Synchrotron Radiation*); however, if you intend to submit to *Acta Crystallographica Section C* or *E* or *IUCrData*, you should make sure that full publication checks are run on the final version of your CIF prior to submission.

### **Publication of your CIF in other journals**

Please refer to the *Notes for Authors* of the relevant journal for any special instructions relating to CIF submission.

---

**PLATON version of 28/11/2022; check.def file version of 28/11/2022**

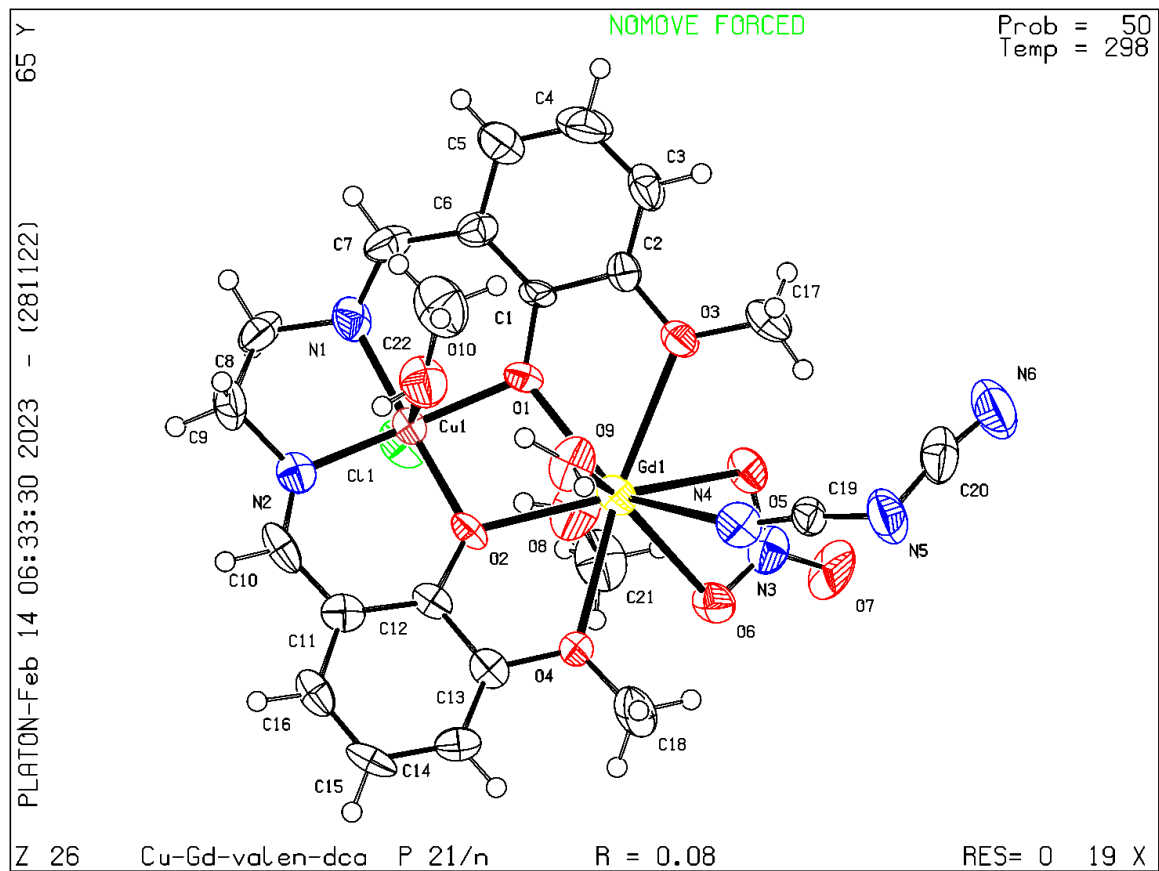

Supplement: s1 [file s1]
