# Supplementary material
Source: MDPI journal article supplement (https://www.mdpi.com/2073-4352/13/3/535)
Supplement: s1 [file s1]

# **Heterometallic Cu-Ln complexes: Synthesis, crystal structures and magnetic characterization**

Shaoliang Zhang <sup>1,\*</sup>, Ruili Du <sup>1</sup>, Xiufang Fan <sup>1</sup>, Xinhua Zhao <sup>2</sup>, Yanlan Wang <sup>1,\*</sup> and Shanshan Li <sup>3,\*</sup>

<sup>1</sup> Institution of Functional Organic Molecules and Materials, School of Chemistry and Chemical Engineering, Liaocheng University, Liaocheng 252059, China

<sup>2</sup> Department of Chemistry, South University of Science and Technology of China, Shenzhen 518055, China

<sup>3</sup> School of Geography and Environment, Liaocheng University, Liaocheng 252059, China

\* Correspondence: zhangshaoliang@lcu.edu.cn (S.Z.); wangyanlan@lcu.edu.cn (Y.W.); lishanshan@lcu.edu.cn (S.L.)

**Table S1** Selected bond lengths [Å] and angles [°] for complex **1**

| Complex <b>1</b> |           |                 |           |                  |           |
|------------------|-----------|-----------------|-----------|------------------|-----------|
| Ho(1)-O(2)       | 2.319(11) | Ho(1)-O(6)      | 2.419(16) | Cu(1)-O(1)       | 1.930(11) |
| Ho(1)-O(1)       | 2.343(11) | Ho(1)-O(8)      | 2.391(13) | Cu(1)-O(2)       | 1.931(11) |
| Ho(1)-O(3)       | 2.587(12) | Ho(1)-O(9)      | 2.304(15) | Cu(1)-N(1)       | 1.910(15) |
| Ho(1)-O(4)       | 2.548(11) | Cu(1)-Cl(1)     | 2.784(6)  | Cu(1)-N(2)       | 1.941(14) |
| Ho(1)-O(5)       | 2.412(14) | Ho(1)-Cu(1)     | 3.381(2)  | O(6)-Ho(1)-O(3)  | 115.5(4)  |
| Ho(1)-N(4)       | 2.414(16) | O(1)-Ho(1)-O(6) | 145.9(5)  | O(4)-Ho(1)-O(3)  | 156.3(4)  |
| Ho(1)-N(3)       | 2.905(16) | O(9)-Ho(1)-O(6) | 136.0(4)  | O(2)-Ho(1)-N(3)  | 133.8(5)  |
| O(2)-Ho(1)-O(1)  | 67.0(4)   | O(8)-Ho(1)-O(6) | 71.9(5)   | O(1)-Ho(1)-N(3)  | 129.1(5)  |
| O(2)-Ho(1)-O(9)  | 77.0(5)   | O(5)-Ho(1)-O(6) | 52.2(4)   | O(9)-Ho(1)-N(3)  | 142.4(4)  |
| O(1)-Ho(1)-O(9)  | 78.0(5)   | N(4)-Ho(1)-O(6) | 72.1(5)   | O(8)-Ho(1)-N(3)  | 71.2(5)   |
| O(2)-Ho(1)-O(8)  | 73.0(5)   | O(2)-Ho(1)-O(4) | 62.5(4)   | O(5)-Ho(1)-N(3)  | 26.7(4)   |
| O(1)-Ho(1)-O(8)  | 76.6(5)   | O(1)-Ho(1)-O(4) | 128.7(4)  | N(4)-Ho(1)-N(3)  | 71.2(5)   |
| O(9)-Ho(1)-O(8)  | 146.4(5)  | O(9)-Ho(1)-O(4) | 82.3(5)   | O(6)-Ho(1)-N(3)  | 25.5(4)   |
| O(2)-Ho(1)-O(5)  | 146.7(5)  | O(8)-Ho(1)-O(4) | 96.8(5)   | O(4)-Ho(1)-N(3)  | 93.8(5)   |
| O(1)-Ho(1)-O(5)  | 106.7(5)  | O(5)-Ho(1)-O(4) | 120.2(5)  | O(3)-Ho(1)-N(3)  | 90.9(5)   |
| O(9)-Ho(1)-O(5)  | 135.3(5)  | N(4)-Ho(1)-O(4) | 80.9(5)   | N(1)-Cu(1)-O(1)  | 94.3(6)   |
| O(8)-Ho(1)-O(5)  | 73.7(5)   | O(6)-Ho(1)-O(4) | 68.6(4)   | O(2)-Cu(1)-O(1)  | 83.6(5)   |
| O(2)-Ho(1)-N(4)  | 134.1(5)  | O(2)-Ho(1)-O(3) | 127.2(4)  | N(2)-Cu(1)-O(1)  | 166.0(7)  |
| O(1)-Ho(1)-N(4)  | 133.6(5)  | O(1)-Ho(1)-O(3) | 62.0(4)   | N(1)-Cu(1)-Cl(1) | 86.6(5)   |
| O(9)-Ho(1)-N(4)  | 71.3(6)   | O(9)-Ho(1)-O(3) | 79.8(5)   | O(2)-Cu(1)-Cl(1) | 97.2(4)   |
| O(8)-Ho(1)-N(4)  | 142.1(6)  | O(8)-Ho(1)-O(3) | 106.7(5)  | N(2)-Cu(1)-Cl(1) | 98.7(5)   |
| O(5)-Ho(1)-N(4)  | 75.0(5)   | O(5)-Ho(1)-O(3) | 65.4(5)   | O(1)-Cu(1)-Cl(1) | 95.3(4)   |
| O(2)-Ho(1)-O(6)  | 114.1(5)  | N(4)-Ho(1)-O(3) | 78.7(5)   | N(1)-Cu(1)-Ho(1) | 136.5(5)  |

**Table S2** Selected bond lengths [Å] and angles [°] for complex **2**

| Complex <b>2</b> |           |                 |           |                  |           |
|------------------|-----------|-----------------|-----------|------------------|-----------|
| Gd(1)-O(1)       | 2.370(10) | Gd(1)-O(6)      | 2.518(11) | Cu(1)-O(1)       | 1.939(10) |
| Gd(1)-O(2)       | 2.368(10) | Gd(1)-O(8)      | 2.431(11) | Cu(1)-O(2)       | 1.925(11) |
| Gd(1)-O(3)       | 2.645(10) | Gd(1)-O(9)      | 2.364(10) | Cu(1)-N(1)       | 1.915(15) |
| Gd(1)-O(4)       | 2.587(10) | Gd(1)-N(4)      | 2.478(14) | Cu(1)-N(2)       | 1.963(14) |
| Gd(1)-O(5)       | 2.486(10) | Cu(1)-Cl(1)     | 2.761(4)  | Gd(1)···Cu(1)    | 3.431(2)  |
| O(1)-Gd(1)-O(9)  | 78.6(4)   | O(8)-Gd(1)-O(6) | 71.4(4)   | O(1)-Gd(1)-N(3)  | 129.3(4)  |
| O(1)-Gd(1)-O(2)  | 65.7(3)   | O(5)-Gd(1)-O(6) | 50.8(4)   | O(9)-Gd(1)-N(3)  | 141.9(4)  |
| O(9)-Gd(1)-O(2)  | 76.2(4)   | N(4)-Gd(1)-O(6) | 70.9(4)   | O(2)-Gd(1)-N(3)  | 135.1(4)  |
| O(1)-Gd(1)-O(8)  | 76.3(4)   | O(1)-Gd(1)-O(4) | 127.9(3)  | O(8)-Gd(1)-N(3)  | 71.1(4)   |
| O(9)-Gd(1)-O(8)  | 146.9(4)  | O(9)-Gd(1)-O(4) | 82.2(4)   | O(5)-Gd(1)-N(3)  | 25.7(4)   |
| O(2)-Gd(1)-O(8)  | 74.0(4)   | O(2)-Gd(1)-O(4) | 62.8(3)   | N(4)-Gd(1)-N(3)  | 69.5(4)   |
| O(1)-Gd(1)-O(5)  | 107.5(4)  | O(8)-Gd(1)-O(4) | 96.7(4)   | O(6)-Gd(1)-N(3)  | 25.2(4)   |
| O(9)-Gd(1)-O(5)  | 136.1(4)  | O(5)-Gd(1)-O(4) | 119.6(4)  | O(4)-Gd(1)-N(3)  | 94.1(4)   |
| O(2)-Gd(1)-O(5)  | 146.8(4)  | N(4)-Gd(1)-O(4) | 81.1(4)   | O(3)-Gd(1)-N(3)  | 91.0(4)   |
| O(8)-Gd(1)-O(5)  | 72.8(4)   | O(6)-Gd(1)-O(4) | 69.2(4)   | N(1)-Cu(1)-O(2)  | 175.3(5)  |
| O(1)-Gd(1)-N(4)  | 135.3(4)  | O(1)-Gd(1)-O(3) | 61.9(3)   | N(1)-Cu(1)-O(1)  | 95.3(5)   |
| O(9)-Gd(1)-N(4)  | 72.4(4)   | O(9)-Gd(1)-O(3) | 80.3(3)   | O(2)-Cu(1)-O(1)  | 83.4(4)   |
| O(2)-Gd(1)-N(4)  | 134.8(4)  | O(2)-Gd(1)-O(3) | 125.6(4)  | N(1)-Cu(1)-N(2)  | 85.7(6)   |
| O(8)-Gd(1)-N(4)  | 140.3(4)  | O(8)-Gd(1)-O(3) | 105.8(4)  | O(2)-Cu(1)-N(2)  | 94.5(5)   |
| O(5)-Gd(1)-N(4)  | 74.1(4)   | O(5)-Gd(1)-O(3) | 66.5(4)   | O(1)-Cu(1)-N(2)  | 167.0(5)  |
| O(1)-Gd(1)-O(6)  | 145.3(3)  | N(4)-Gd(1)-O(3) | 80.0(4)   | N(1)-Cu(1)-Cl(1) | 87.1(4)   |
| O(9)-Gd(1)-O(6)  | 136.1(4)  | O(6)-Gd(1)-O(3) | 115.6(4)  | O(2)-Cu(1)-Cl(1) | 97.5(3)   |
| O(2)-Gd(1)-O(6)  | 115.4(4)  | O(4)-Gd(1)-O(3) | 157.3(3)  | O(1)-Cu(1)-Cl(1) | 94.6(3)   |

**Table S3** The  $\text{Ln}^{\text{III}}$  center of geometry analysis for complexes **1-2** by SHAPE software

| Atom | EP-9    | OPY-9    | HBPY-9  | JTC-9   | JCCU-9 | CCU-9 | JCSAPR-9 |
|------|---------|----------|---------|---------|--------|-------|----------|
| Ho1  | 33.293  | 23.204   | 15.634  | 14.843  | 9.023  | 7.373 | 3.826    |
| Gd1  | 32.833  | 23.092   | 15.808  | 14.780  | 8.987  | 7.434 | 3.986    |
| Atom | CSAPR-9 | JTCTPR-9 | TCTPR-9 | JTDIC-9 | HH-9   | MFF-9 |          |
| Ho1  | 3.079   | 4.623    | 4.077   | 12.275  | 5.880  | 2.243 |          |
| Gd1  | 3.220   | 4.615    | 4.211   | 12.371  | 5.863  | 2.298 |          |

|          |    |          |                                    |
|----------|----|----------|------------------------------------|
| EP-9     | 1  | $D_{9h}$ | Enneagon                           |
| OPY-9    | 2  | $C_{8v}$ | Octagonal pyramid                  |
| HBPY-9   | 3  | $D_{7h}$ | Heptagonal bipyramid               |
| JTC-9    | 4  | $C_{3v}$ | Johnson triangular cupola J3       |
| JCCU-9   | 5  | $C_{4v}$ | Capped cube J8                     |
| CCU-9    | 6  | $C_{4v}$ | Spherical-relaxed capped cube      |
| JCSAPR-9 | 7  | $C_{4v}$ | Capped square antiprism J10        |
| CSAPR-9  | 8  | $C_{4v}$ | Spherical capped square antiprism  |
| JTCTPR-9 | 9  | $D_{3h}$ | Tricapped trigonal prism J51       |
| TCTPR-9  | 10 | $D_{3h}$ | Spherical tricapped trigonal prism |
| JTDIC-9  | 11 | $C_{3v}$ | Tridiminished icosahedron J63      |
| HH-9     | 12 | $C_{2v}$ | Hula-hoop                          |
| MFF-9    | 13 | $C_s$    | Muffin                             |

**Table S4** The  $\text{Cu}^{\text{II}}$  center of geometry analysis for complexes **1-2** by SHAPE software.

| Complex | PP-5   | vOC-5 | TBPY-5 | SPY-5 | JTBPY-5 |
|---------|--------|-------|--------|-------|---------|
| 1       | 31.404 | 3.526 | 5.289  | 1.687 | 9.582   |
| 2       | 30.917 | 3.356 | 5.460  | 1.640 | 9.847   |

|         |   |          |                                |
|---------|---|----------|--------------------------------|
| PP-5    | 1 | $D_{5h}$ | Pentagon                       |
| vOC-5   | 2 | $C_{4v}$ | Vacant octahedron              |
| TBPY-5  | 3 | $D_{3h}$ | Trigonal bipyramid             |
| SPY-5   | 4 | $C_{4v}$ | Square pyramid                 |
| JTBPY-5 | 5 | $D_{3h}$ | Johnson trigonal bipyramid J12 |

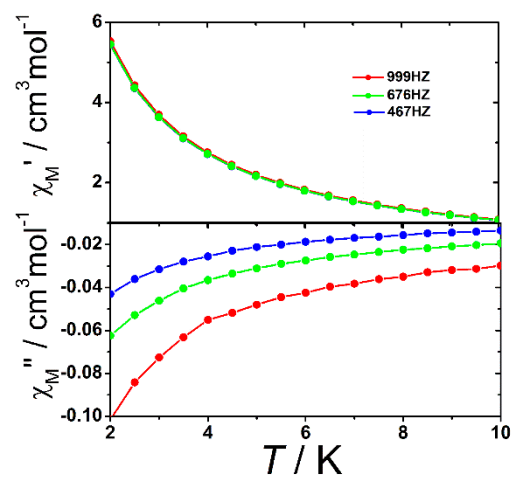

Figure S1 Temperature dependent ac susceptibilities of complex **2** at different frequencies under  $H_{ac} = 2$  Oe and  $H_{dc} = 0$  Oe

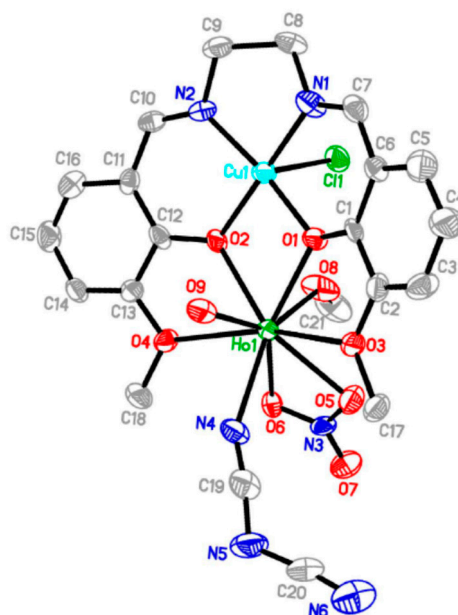

Figure S2 A view of the molecular structure of complex **1**. Thermal ellipsoids are depicted at 30% probability.

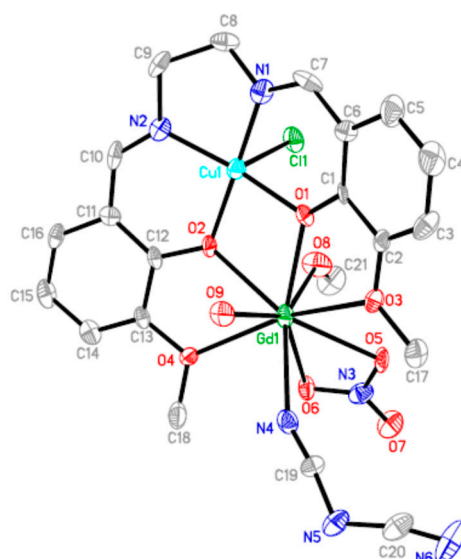

Figure S3 A view of the molecular structure of complex **2**. Thermal ellipsoids are depicted at 30% probability

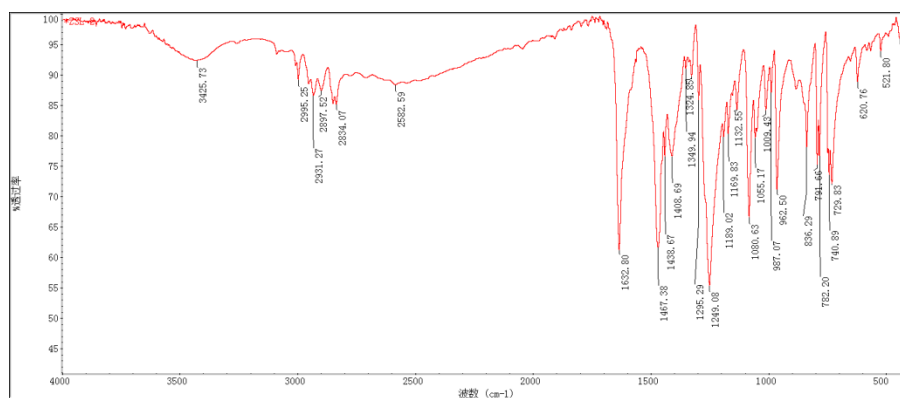

Fig. S4 The IR spectra of the H<sub>2</sub>L Ligand

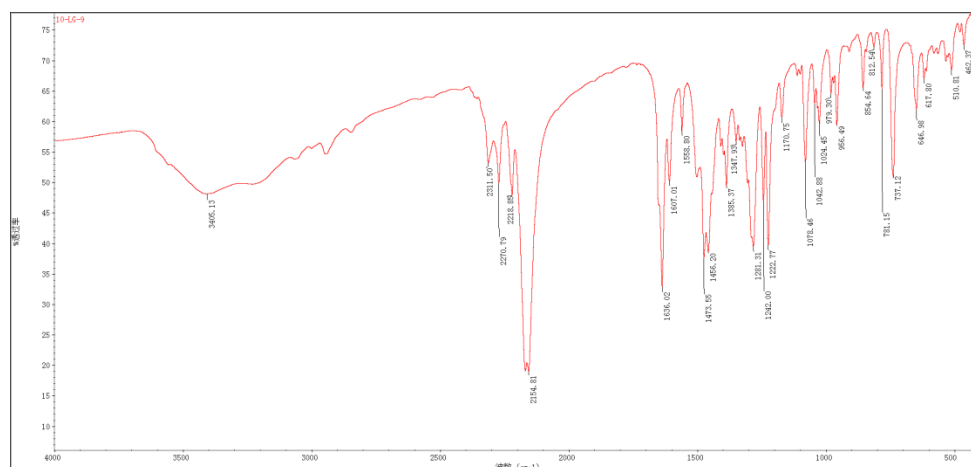

Fig. S5 The IR spectra of complex **1**.

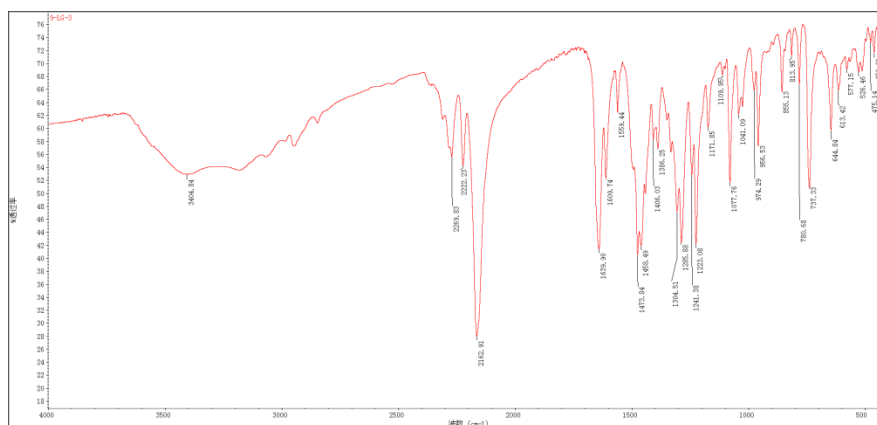

Figure S6 The IR spectra of complex 2.

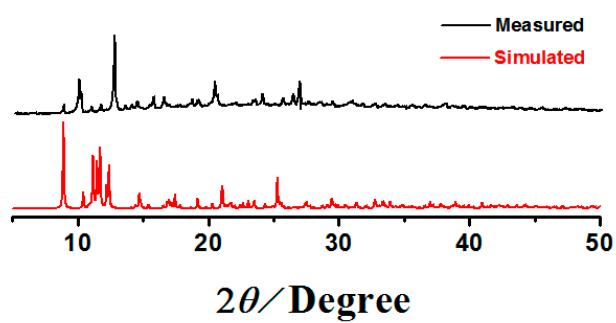

Figure S7 The powder XRD of complex 1.

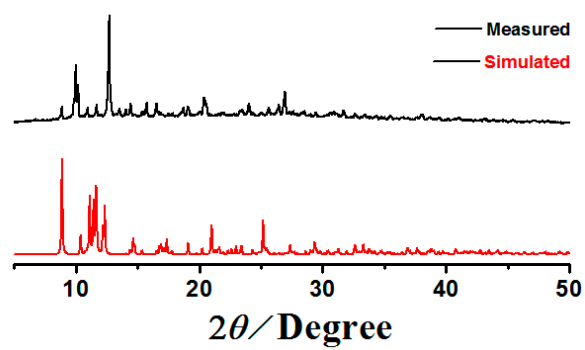

Figure S8 The powder XRD of complex 2.
