# Supplementary material
Source: MDPI journal article supplement (https://www.mdpi.com/2073-4352/13/3/535)
Supplement: s1 [file s1]

Archive with 5 entries (5 files):
- 2097679.cif
- 2097680.cif
- checkcif1.pdf
- checkcif2.pdf
- Supplementary- ESI.pdf
