# Supplementary material
Source: MDPI journal article supplement (https://www.mdpi.com/2073-4352/13/3/535)
Supplement: s1 [file s1 › 2097679.cif]

 
data_Cu-Ho-valen-dca
 
_audit_creation_method            SHELXL-2014
_chemical_name_systematic
;
 ?
;
_chemical_name_common             complex1
_chemical_melting_point           'not measured'
_chemical_formula_moiety          'C22 H28 Cl Cu Ho N6 O10'
_chemical_formula_sum
 'C22 H28 Cl Cu Ho N6 O10' 
_chemical_formula_weight          800.42

loop_
 _atom_type_symbol
 _atom_type_description
 _atom_type_scat_dispersion_real
 _atom_type_scat_dispersion_imag
 _atom_type_scat_source
 'C'  'C'   0.0033   0.0016
 'International Tables Vol C Tables 4.2.6.8 and 6.1.1.4'
 'H'  'H'   0.0000   0.0000
 'International Tables Vol C Tables 4.2.6.8 and 6.1.1.4'
 'N'  'N'   0.0061   0.0033
 'International Tables Vol C Tables 4.2.6.8 and 6.1.1.4'
 'O'  'O'   0.0106   0.0060
 'International Tables Vol C Tables 4.2.6.8 and 6.1.1.4'
 'Cl'  'Cl'   0.1484   0.1585
 'International Tables Vol C Tables 4.2.6.8 and 6.1.1.4'
 'Cu'  'Cu'   0.3201   1.2651
 'International Tables Vol C Tables 4.2.6.8 and 6.1.1.4'
 'Ho'  'Ho'  -0.2175   4.6783
 'International Tables Vol C Tables 4.2.6.8 and 6.1.1.4'
 
_space_group_crystal_system       monoclinic
_space_group_IT_number            14
_space_group_name_H-M_alt         'P 21/n'
_space_group_name_Hall            '-P 2yn'
 
_shelx_space_group_comment
;
The symmetry employed for this shelxl refinement is uniquely defined
by the following loop, which should always be used as a source of
symmetry information in preference to the above space-group names.
They are only intended as comments.
;
 
loop_
 _space_group_symop_operation_xyz
 'x, y, z'
 '-x+1/2, y+1/2, -z+1/2'
 '-x, -y, -z'
 'x-1/2, -y-1/2, z-1/2'
 
_cell_length_a                    8.8038(6)
_cell_length_b                    16.3659(12)
_cell_length_c                    19.8889(13)
_cell_angle_alpha                 90
_cell_angle_beta                  91.5570(10)
_cell_angle_gamma                 90
_cell_volume                      2864.6(3)
_cell_formula_units_Z             4
_cell_measurement_temperature     298(2)
_cell_measurement_reflns_used     3801  
_cell_measurement_theta_min       2.397
_cell_measurement_theta_max       26.411 
 
_exptl_crystal_description        'block' 
_exptl_crystal_colour             'brown' 
_exptl_crystal_density_meas       ? 
_exptl_crystal_density_method     ?              
_exptl_crystal_density_diffrn     1.856          
_exptl_crystal_F_000              1580
_exptl_transmission_factor_min    0.190                                              
_exptl_transmission_factor_max    0.233                                             
_exptl_crystal_size_max           0.480
_exptl_crystal_size_mid           0.420
_exptl_crystal_size_min           0.400
_exptl_absorpt_coefficient_mu     3.640
_shelx_estimated_absorpt_T_min    0.274
_shelx_estimated_absorpt_T_max    0.324
_exptl_absorpt_correction_type    multi-scan 
_exptl_absorpt_correction_T_min   ? 
_exptl_absorpt_correction_T_max   ? 
_exptl_absorpt_process_details    sadabs 
 
_exptl_special_details
;
 ?
;
 
_diffrn_ambient_temperature       298(2)
_diffrn_radiation_wavelength      0.71073
_diffrn_radiation_type            MoK\a
_diffrn_source                    'fine-focus sealed tube'                       
_diffrn_measurement_device_type   graphite 
_diffrn_measurement_method        'CCD area detector'  
_diffrn_detector_area_resol_mean  'CCD area detector'  
_diffrn_reflns_number             13358
_diffrn_reflns_av_unetI/netI      0.1585
_diffrn_reflns_av_R_equivalents   0.1262
_diffrn_reflns_limit_h_min        -9
_diffrn_reflns_limit_h_max        10
_diffrn_reflns_limit_k_min        -19
_diffrn_reflns_limit_k_max        17
_diffrn_reflns_limit_l_min        -16
_diffrn_reflns_limit_l_max        23
_diffrn_reflns_theta_min          2.397
_diffrn_reflns_theta_max          25.019
_diffrn_reflns_theta_full         25.242
_diffrn_measured_fraction_theta_max   0.986
_diffrn_measured_fraction_theta_full  0.960
_diffrn_reflns_Laue_measured_fraction_max    0.986
_diffrn_reflns_Laue_measured_fraction_full   0.960
_diffrn_reflns_point_group_measured_fraction_max   0.986
_diffrn_reflns_point_group_measured_fraction_full  0.960
_reflns_number_total              4984
_reflns_number_gt                 2754
_reflns_threshold_expression      'I > 2\s(I)'
_reflns_Friedel_coverage          0.000
_reflns_Friedel_fraction_max      .
_reflns_Friedel_fraction_full     .
 
_reflns_special_details
;
 Reflections were merged by SHELXL according to the crystal
 class for the calculation of statistics and refinement.
 
 Structure factors included contributions from the .fab file.
 
 _reflns_Friedel_fraction is defined as the number of unique
 Friedel pairs measured divided by the number that would be
 possible theoretically, ignoring centric projections and
 systematic absences.
;
 
_computing_data_collection        'Bruker APEX2'
_computing_cell_refinement         'Bruker SAINT'
_computing_data_reduction         'Bruker SAINT'
_computing_structure_solution     'SHELXS-2014 (Sheldrick, 2014)'
_computing_structure_refinement   'SHELXL-2014 (Sheldrick, 2014)'
_computing_molecular_graphics     'Diamond'
_computing_publication_material   'SHELXL-2014 (Sheldrick, 2014)'
 
_refine_special_details
;
 ?
;
_refine_ls_structure_factor_coef  Fsqd
_refine_ls_matrix_type            full
_refine_ls_weighting_scheme       calc
_refine_ls_weighting_details
'w=1/[\s^2^(Fo^2^)+(0.0003P)^2^+159.9876P] where P=(Fo^2^+2Fc^2^)/3'
_atom_sites_solution_primary      ?
_atom_sites_solution_secondary    ?
_atom_sites_solution_hydrogens    mixed
_refine_ls_hydrogen_treatment     constr
_refine_ls_extinction_method      none
_refine_ls_extinction_coef        .
_refine_ls_number_reflns          4984
_refine_ls_number_parameters      346
_refine_ls_number_restraints      6
_refine_ls_R_factor_all           0.1692
_refine_ls_R_factor_gt            0.0901
_refine_ls_wR_factor_ref          0.2156
_refine_ls_wR_factor_gt           0.1761
_refine_ls_goodness_of_fit_ref    0.865
_refine_ls_restrained_S_all       0.866
_refine_ls_shift/su_max           0.001
_refine_ls_shift/su_mean          0.000
 
loop_
 _atom_site_label
 _atom_site_type_symbol
 _atom_site_fract_x
 _atom_site_fract_y
 _atom_site_fract_z
 _atom_site_U_iso_or_equiv
 _atom_site_adp_type
 _atom_site_occupancy
 _atom_site_site_symmetry_order  
 _atom_site_calc_flag
 _atom_site_refinement_flags_posn
 _atom_site_refinement_flags_adp
 _atom_site_refinement_flags_occupancy
 _atom_site_disorder_assembly
 _atom_site_disorder_group
Ho1 Ho 1.48145(9) 0.65232(5) 0.67497(5) 0.0403(3) Uani 1 1 d . . . . .
Cu1 Cu 1.2927(3) 0.57107(13) 0.80480(13) 0.0481(7) Uani 1 1 d . . . . .
Cl1 Cl 1.0041(5) 0.5791(3) 0.7445(3) 0.0616(15) Uani 1 1 d . . . . .
O1 O 1.3558(14) 0.6778(7) 0.7752(6) 0.048(3) Uani 1 1 d . . . . .
O2 O 1.3990(13) 0.5340(6) 0.7268(7) 0.047(3) Uani 1 1 d . . . . .
O3 O 1.5080(14) 0.7962(7) 0.7280(7) 0.049(3) Uani 1 1 d . . . . .
O4 O 1.5732(14) 0.5164(7) 0.6285(7) 0.048(3) Uani 1 1 d . . . . .
O5 O 1.4182(16) 0.7635(8) 0.5997(8) 0.061(4) Uani 1 1 d . . . . .
O6 O 1.4604(15) 0.6490(8) 0.5535(8) 0.066(4) Uani 1 1 d . . . . .
O7 O 1.4116(19) 0.7566(11) 0.4895(8) 0.090(6) Uani 1 1 d . . . . .
O8 O 1.2193(14) 0.6355(9) 0.6436(8) 0.069(4) Uani 1 1 d . U . . .
H8 H 1.1655 0.6233 0.6751 0.104 Uiso 1 1 calc R U . . .
O9 O 1.6702(15) 0.6275(9) 0.7549(7) 0.069(4) Uani 1 1 d . . . . .
H9C H 1.7630 0.6143 0.7516 0.082 Uiso 1 1 d R U . . .
H9D H 1.6415 0.6143 0.7939 0.082 Uiso 1 1 d R U . . .
O10 O 0.5834(17) 0.5850(10) 0.8782(8) 0.074(4) Uani 1 1 d . . . . .
H10A H 0.6372 0.5442 0.8775 0.111 Uiso 1 1 calc R U . . .
N1 N 1.2015(17) 0.6109(9) 0.8844(9) 0.054(5) Uani 1 1 d . . . . .
N2 N 1.2779(17) 0.4636(9) 0.8454(8) 0.047(4) Uani 1 1 d . . . . .
N3 N 1.4277(17) 0.7234(11) 0.5426(9) 0.050(4) Uani 1 1 d . . . . .
N4 N 1.7213(18) 0.6964(10) 0.6314(9) 0.058(5) Uani 1 1 d . . . . .
N5 N 1.896(3) 0.7899(12) 0.5755(13) 0.103(9) Uani 1 1 d . . . . .
N6 N 1.859(3) 0.9356(15) 0.5650(12) 0.100(8) Uani 1 1 d . . . . .
C1 C 1.3656(13) 0.7412(6) 0.8139(5) 0.046(5) Uani 1 1 d G . . . .
C2 C 1.4493(14) 0.8094(7) 0.7926(6) 0.051(5) Uani 1 1 d G . . . .
C3 C 1.4676(15) 0.8790(7) 0.8301(7) 0.060(6) Uani 1 1 d G . . . .
H3 H 1.5269 0.9220 0.8150 0.072 Uiso 1 1 calc R U . . .
C4 C 1.3967(17) 0.8837(7) 0.8900(7) 0.082(8) Uani 1 1 d G . . . .
H4 H 1.4023 0.9316 0.9151 0.098 Uiso 1 1 calc R U . . .
C5 C 1.3189(15) 0.8195(6) 0.9129(6) 0.071(7) Uani 1 1 d G . . . .
H5 H 1.2763 0.8234 0.9551 0.086 Uiso 1 1 calc R U . . .
C6 C 1.2990(10) 0.7481(5) 0.8772(5) 0.049(5) Uani 1 1 d G . . . .
C7 C 1.2137(16) 0.6828(8) 0.9061(7) 0.050(5) Uani 1 1 d G . . . .
H7 H 1.1620 0.6950 0.9450 0.060 Uiso 1 1 calc R U . . .
C8 C 1.119(2) 0.5460(12) 0.9187(11) 0.059(6) Uani 1 1 d . . . . .
H8A H 1.0194 0.5380 0.8976 0.070 Uiso 1 1 calc R U . . .
H8B H 1.1060 0.5599 0.9656 0.070 Uiso 1 1 calc R U . . .
C9 C 1.216(3) 0.4675(12) 0.9126(12) 0.067(7) Uani 1 1 d . . . . .
H9A H 1.2987 0.4683 0.9460 0.081 Uiso 1 1 calc R U . . .
H9B H 1.1542 0.4197 0.9205 0.081 Uiso 1 1 calc R U . . .
C10 C 1.3325(15) 0.3995(8) 0.8223(7) 0.048(5) Uani 1 1 d G . . . .
H10 H 1.3184 0.3519 0.8469 0.057 Uiso 1 1 calc R U . . .
C11 C 1.4162(9) 0.3920(5) 0.7607(5) 0.046(5) Uani 1 1 d G . . . .
C12 C 1.4497(12) 0.4574(5) 0.7178(5) 0.052(6) Uani 1 1 d G . . . .
C13 C 1.5447(13) 0.4456(6) 0.6638(6) 0.045(5) Uani 1 1 d G . . . .
C14 C 1.5986(13) 0.3697(7) 0.6496(6) 0.058(6) Uani 1 1 d G . . . .
H14 H 1.6622 0.3619 0.6136 0.069 Uiso 1 1 calc R U . . .
C15 C 1.5577(15) 0.3042(6) 0.6895(7) 0.068(7) Uani 1 1 d G . . . .
H15 H 1.5869 0.2516 0.6777 0.082 Uiso 1 1 calc R U . . .
C16 C 1.4767(13) 0.3157(5) 0.7448(6) 0.060(6) Uani 1 1 d G . . . .
H16 H 1.4605 0.2718 0.7734 0.072 Uiso 1 1 calc R U . . .
C17 C 1.591(2) 0.8641(11) 0.7012(12) 0.061(6) Uani 1 1 d . . . . .
H17A H 1.5332 0.9133 0.7056 0.091 Uiso 1 1 calc R U . . .
H17B H 1.6103 0.8545 0.6545 0.091 Uiso 1 1 calc R U . . .
H17C H 1.6865 0.8698 0.7255 0.091 Uiso 1 1 calc R U . . .
C18 C 1.672(3) 0.5079(13) 0.5727(13) 0.079(8) Uani 1 1 d . . . . .
H18A H 1.7740 0.4990 0.5890 0.118 Uiso 1 1 calc R U . . .
H18B H 1.6677 0.5567 0.5459 0.118 Uiso 1 1 calc R U . . .
H18C H 1.6395 0.4621 0.5456 0.118 Uiso 1 1 calc R U . . .
C19 C 1.800(3) 0.7442(14) 0.6034(11) 0.064(6) Uani 1 1 d . . . . .
C20 C 1.871(3) 0.8667(18) 0.5712(15) 0.081(8) Uani 1 1 d . . . . .
C21 C 1.136(3) 0.6267(18) 0.5830(15) 0.099(10) Uani 1 1 d . . . . .
H21A H 1.0921 0.6784 0.5703 0.148 Uiso 1 1 calc R U . . .
H21B H 1.0566 0.5873 0.5886 0.148 Uiso 1 1 calc R U . . .
H21C H 1.2022 0.6085 0.5485 0.148 Uiso 1 1 calc R U . . .
C22 C 0.646(3) 0.6419(18) 0.9244(15) 0.103(9) Uani 1 1 d . . . . .
H22A H 0.6319 0.6962 0.9071 0.155 Uiso 1 1 calc R U . . .
H22B H 0.7528 0.6313 0.9309 0.155 Uiso 1 1 calc R U . . .
H22C H 0.5966 0.6369 0.9666 0.155 Uiso 1 1 calc R U . . .
 
loop_
 _atom_site_aniso_label
 _atom_site_aniso_U_11
 _atom_site_aniso_U_22
 _atom_site_aniso_U_33
 _atom_site_aniso_U_23
 _atom_site_aniso_U_13
 _atom_site_aniso_U_12
Ho1 0.0426(5) 0.0338(4) 0.0451(5) 0.0027(5) 0.0114(4) 0.0022(4)
Cu1 0.0576(14) 0.0366(11) 0.0510(16) 0.0013(12) 0.0203(12) -0.0020(10)
Cl1 0.041(3) 0.055(3) 0.089(5) 0.003(3) 0.015(3) -0.001(2)
O1 0.063(8) 0.034(6) 0.050(8) -0.021(6) 0.024(7) -0.011(6)
O2 0.051(7) 0.026(6) 0.066(10) -0.012(6) 0.022(7) 0.000(5)
O3 0.059(8) 0.032(6) 0.057(9) 0.001(6) 0.016(7) -0.001(6)
O4 0.068(8) 0.030(6) 0.048(9) -0.003(6) 0.014(7) 0.000(6)
O5 0.076(10) 0.048(8) 0.058(11) 0.000(8) 0.002(8) 0.004(7)
O6 0.067(9) 0.039(7) 0.095(12) 0.001(8) 0.030(8) 0.015(7)
O7 0.108(13) 0.104(13) 0.058(11) 0.052(11) 0.010(10) 0.030(11)
O8 0.037(6) 0.096(8) 0.074(8) 0.005(7) -0.001(6) -0.017(6)
O9 0.061(9) 0.080(10) 0.066(11) 0.013(9) 0.022(8) 0.001(8)
O10 0.083(11) 0.080(11) 0.059(11) -0.008(9) -0.011(9) -0.008(9)
N1 0.054(10) 0.051(10) 0.057(12) -0.022(9) 0.016(9) -0.020(8)
N2 0.054(10) 0.047(9) 0.041(10) 0.016(8) 0.001(8) -0.009(8)
N3 0.044(9) 0.070(11) 0.035(10) 0.031(10) 0.001(8) 0.007(8)
N4 0.051(10) 0.060(10) 0.064(13) -0.008(10) 0.014(9) -0.001(8)
N5 0.115(18) 0.059(13) 0.14(2) 0.004(14) 0.062(17) -0.023(12)
N6 0.14(2) 0.089(16) 0.069(17) -0.010(15) -0.001(15) -0.034(16)
C1 0.043(10) 0.030(9) 0.065(15) -0.011(10) 0.017(10) 0.005(8)
C2 0.057(12) 0.039(10) 0.057(14) -0.002(10) 0.004(11) 0.008(9)
C3 0.086(16) 0.042(10) 0.054(15) -0.004(11) 0.010(13) -0.021(10)
C4 0.12(2) 0.060(14) 0.067(18) -0.014(14) 0.025(16) -0.002(14)
C5 0.087(17) 0.063(14) 0.065(17) -0.008(13) 0.018(14) 0.006(12)
C6 0.056(12) 0.044(10) 0.049(13) -0.011(10) 0.011(10) 0.006(9)
C7 0.052(12) 0.060(12) 0.038(12) -0.005(11) 0.006(10) 0.009(10)
C8 0.053(12) 0.065(13) 0.059(15) 0.003(12) 0.026(11) -0.011(10)
C9 0.077(15) 0.052(12) 0.073(18) 0.010(12) 0.022(13) -0.011(11)
C10 0.050(11) 0.046(11) 0.047(13) 0.014(10) -0.004(10) -0.016(9)
C11 0.036(10) 0.040(10) 0.061(14) -0.005(10) -0.007(10) 0.000(8)
C12 0.032(9) 0.032(9) 0.092(18) -0.010(10) 0.020(10) -0.003(8)
C13 0.049(11) 0.040(10) 0.045(13) 0.003(9) -0.001(9) -0.003(8)
C14 0.052(12) 0.040(10) 0.083(17) -0.011(11) 0.028(11) 0.001(9)
C15 0.079(15) 0.038(11) 0.09(2) -0.007(12) 0.007(14) 0.008(10)
C16 0.072(14) 0.049(11) 0.059(15) 0.000(12) -0.009(12) -0.008(10)
C17 0.056(12) 0.042(11) 0.085(18) 0.014(11) 0.008(12) -0.002(9)
C18 0.079(16) 0.058(13) 0.10(2) 0.002(14) 0.051(15) 0.011(12)
C19 0.071(14) 0.070(14) 0.050(14) -0.037(13) 0.006(12) -0.022(12)
C20 0.070(16) 0.081(19) 0.09(2) 0.010(17) 0.022(14) -0.022(14)
C21 0.058(15) 0.12(2) 0.12(3) -0.03(2) 0.018(16) -0.023(15)
C22 0.11(2) 0.11(2) 0.09(2) 0.00(2) -0.039(18) -0.008(19)
 
_geom_special_details
;
 All esds (except the esd in the dihedral angle between two l.s. planes)
 are estimated using the full covariance matrix.  The cell esds are taken
 into account individually in the estimation of esds in distances, angles
 and torsion angles; correlations between esds in cell parameters are only
 used when they are defined by crystal symmetry.  An approximate (isotropic)
 treatment of cell esds is used for estimating esds involving l.s. planes.
;
 
loop_
 _geom_bond_atom_site_label_1
 _geom_bond_atom_site_label_2
 _geom_bond_distance
 _geom_bond_site_symmetry_2
 _geom_bond_publ_flag
Ho1 O2 2.319(11) . ?
Ho1 O9 2.304(15) . ?
Ho1 O1 2.343(11) . ?
Ho1 O8 2.391(13) . ?
Ho1 N4 2.414(16) . ?
Ho1 O5 2.412(14) . ?
Ho1 O6 2.419(16) . ?
Ho1 O4 2.548(11) . ?
Ho1 O3 2.587(12) . ?
Ho1 N3 2.905(16) . ?
Ho1 Cu1 3.381(2) . ?
Cu1 N1 1.910(15) . ?
Cu1 O2 1.931(11) . ?
Cu1 N2 1.941(14) . ?
Cu1 O1 1.930(11) . ?
Cu1 Cl1 2.784(6) . ?
O1 C1 1.294(14) . ?
O2 C12 1.344(13) . ?
O3 C2 1.415(16) . ?
O3 C17 1.44(2) . ?
O4 C13 1.381(15) . ?
O4 C18 1.44(2) . ?
O5 N3 1.32(2) . ?
O6 N3 1.267(19) . ?
O7 N3 1.192(19) . ?
O8 C21 1.40(3) . ?
O10 C22 1.41(3) . ?
N1 C7 1.256(19) . ?
N1 C8 1.47(2) . ?
N2 C10 1.248(19) . ?
N2 C9 1.46(2) . ?
N4 C19 1.19(3) . ?
N5 C20 1.28(3) . ?
N5 C19 1.27(3) . ?
N6 C20 1.14(3) . ?
C1 C6 1.407(6) . ?
C1 C2 1.409(7) . ?
C2 C3 1.367(6) . ?
C3 C4 1.363(6) . ?
C4 C5 1.340(6) . ?
C5 C6 1.376(6) . ?
C6 C7 1.436(7) . ?
C8 C9 1.55(3) . ?
C10 C11 1.452(6) . ?
C11 C16 1.397(6) . ?
C11 C12 1.406(6) . ?
C12 C13 1.393(6) . ?
C13 C14 1.361(6) . ?
C14 C15 1.387(6) . ?
C15 C16 1.341(6) . ?
 
loop_
 _geom_angle_atom_site_label_1
 _geom_angle_atom_site_label_2
 _geom_angle_atom_site_label_3
 _geom_angle
 _geom_angle_site_symmetry_1
 _geom_angle_site_symmetry_3
 _geom_angle_publ_flag
O2 Ho1 O9 77.0(5) . . ?
O2 Ho1 O1 67.0(4) . . ?
O9 Ho1 O1 78.0(5) . . ?
O2 Ho1 O8 73.0(5) . . ?
O9 Ho1 O8 146.4(5) . . ?
O1 Ho1 O8 76.6(5) . . ?
O2 Ho1 N4 134.1(5) . . ?
O9 Ho1 N4 71.3(6) . . ?
O1 Ho1 N4 133.6(5) . . ?
O8 Ho1 N4 142.1(6) . . ?
O2 Ho1 O5 146.7(5) . . ?
O9 Ho1 O5 135.3(5) . . ?
O1 Ho1 O5 106.7(5) . . ?
O8 Ho1 O5 73.7(5) . . ?
N4 Ho1 O5 75.0(5) . . ?
O2 Ho1 O6 114.1(5) . . ?
O9 Ho1 O6 136.0(4) . . ?
O1 Ho1 O6 145.9(5) . . ?
O8 Ho1 O6 71.9(5) . . ?
N4 Ho1 O6 72.1(5) . . ?
O5 Ho1 O6 52.2(4) . . ?
O2 Ho1 O4 62.5(4) . . ?
O9 Ho1 O4 82.3(5) . . ?
O1 Ho1 O4 128.7(4) . . ?
O8 Ho1 O4 96.8(5) . . ?
N4 Ho1 O4 80.9(5) . . ?
O5 Ho1 O4 120.2(5) . . ?
O6 Ho1 O4 68.6(4) . . ?
O2 Ho1 O3 127.2(4) . . ?
O9 Ho1 O3 79.8(5) . . ?
O1 Ho1 O3 62.0(4) . . ?
O8 Ho1 O3 106.7(5) . . ?
N4 Ho1 O3 78.7(5) . . ?
O5 Ho1 O3 65.4(5) . . ?
O6 Ho1 O3 115.5(4) . . ?
O4 Ho1 O3 156.3(4) . . ?
O2 Ho1 N3 133.8(5) . . ?
O9 Ho1 N3 142.4(4) . . ?
O1 Ho1 N3 129.1(5) . . ?
O8 Ho1 N3 71.2(5) . . ?
N4 Ho1 N3 71.2(5) . . ?
O5 Ho1 N3 26.7(4) . . ?
O6 Ho1 N3 25.5(4) . . ?
O4 Ho1 N3 93.8(5) . . ?
O3 Ho1 N3 90.9(5) . . ?
O2 Ho1 Cu1 33.5(3) . . ?
O9 Ho1 Cu1 76.3(3) . . ?
O1 Ho1 Cu1 33.6(3) . . ?
O8 Ho1 Cu1 70.3(4) . . ?
N4 Ho1 Cu1 147.6(5) . . ?
O5 Ho1 Cu1 131.4(3) . . ?
O6 Ho1 Cu1 136.7(3) . . ?
O4 Ho1 Cu1 95.8(3) . . ?
O3 Ho1 Cu1 95.0(3) . . ?
N3 Ho1 Cu1 141.1(3) . . ?
N1 Cu1 O2 175.8(6) . . ?
N1 Cu1 N2 86.0(7) . . ?
O2 Cu1 N2 95.1(6) . . ?
N1 Cu1 O1 94.3(6) . . ?
O2 Cu1 O1 83.6(5) . . ?
N2 Cu1 O1 166.0(7) . . ?
N1 Cu1 Cl1 86.6(5) . . ?
O2 Cu1 Cl1 97.2(4) . . ?
N2 Cu1 Cl1 98.7(5) . . ?
O1 Cu1 Cl1 95.3(4) . . ?
N1 Cu1 Ho1 136.5(5) . . ?
O2 Cu1 Ho1 41.5(3) . . ?
N2 Cu1 Ho1 135.6(5) . . ?
O1 Cu1 Ho1 42.2(3) . . ?
Cl1 Cu1 Ho1 96.56(13) . . ?
C1 O1 Cu1 124.0(9) . . ?
C1 O1 Ho1 128.6(8) . . ?
Cu1 O1 Ho1 104.2(4) . . ?
C12 O2 Cu1 124.7(9) . . ?
C12 O2 Ho1 127.6(8) . . ?
Cu1 O2 Ho1 105.0(4) . . ?
C2 O3 C17 114.8(13) . . ?
C2 O3 Ho1 118.6(7) . . ?
C17 O3 Ho1 126.3(11) . . ?
C13 O4 C18 115.6(12) . . ?
C13 O4 Ho1 119.0(8) . . ?
C18 O4 Ho1 124.7(11) . . ?
N3 O5 Ho1 98.1(10) . . ?
N3 O6 Ho1 99.2(11) . . ?
C21 O8 Ho1 135.7(13) . . ?
C7 N1 C8 123.9(15) . . ?
C7 N1 Cu1 124.8(12) . . ?
C8 N1 Cu1 111.3(12) . . ?
C10 N2 C9 122.1(15) . . ?
C10 N2 Cu1 125.3(12) . . ?
C9 N2 Cu1 111.9(12) . . ?
O7 N3 O6 128(2) . . ?
O7 N3 O5 121.9(18) . . ?
O6 N3 O5 110.6(15) . . ?
O7 N3 Ho1 175.8(16) . . ?
O6 N3 Ho1 55.3(10) . . ?
O5 N3 Ho1 55.3(8) . . ?
C19 N4 Ho1 152.6(17) . . ?
C20 N5 C19 120(2) . . ?
O1 C1 C6 125.0(8) . . ?
O1 C1 C2 118.9(8) . . ?
C6 C1 C2 116.1 . . ?
C3 C2 O3 125.6(8) . . ?
C3 C2 C1 123.4 . . ?
O3 C2 C1 111.0(8) . . ?
C4 C3 C2 118.3 . . ?
C5 C4 C3 120.2 . . ?
C4 C5 C6 123.3 . . ?
C5 C6 C1 118.7 . . ?
C5 C6 C7 119.0 . . ?
C1 C6 C7 122.3 . . ?
N1 C7 C6 126.8(10) . . ?
N1 C8 C9 106.3(14) . . ?
N2 C9 C8 109.2(17) . . ?
N2 C10 C11 126.3(10) . . ?
C16 C11 C12 117.2 . . ?
C16 C11 C10 118.1 . . ?
C12 C11 C10 124.6 . . ?
O2 C12 C13 116.2(8) . . ?
O2 C12 C11 123.6(8) . . ?
C13 C12 C11 120.1 . . ?
C14 C13 O4 126.3(8) . . ?
C14 C13 C12 120.4 . . ?
O4 C13 C12 113.3(8) . . ?
C13 C14 C15 119.3 . . ?
C16 C15 C14 120.9 . . ?
C15 C16 C11 121.7 . . ?
N4 C19 N5 174(3) . . ?
N6 C20 N5 175(3) . . ?
 
_refine_diff_density_max    2.671
_refine_diff_density_min   -3.211
_refine_diff_density_rms    0.239

_shelxl_version_number 2014-3

_shelx_res_file
;
TITL 180204f in P2(1)/n
CELL 0.71073 8.8038 16.3659 19.8889 90.000 91.557 90.000
ZERR 4.0000 0.0006 0.0012 0.0013 0.000 0.001 0.000
LATT 1
SYMM 0.5-X, 0.5+Y, 0.5-Z
SFAC C  H  N  O  Cl Cu Ho
UNIT 88 112 24 40 4 4 4
MERG 2
OMIT  -1.00  50.04
OMIT     1  12  16
OMIT      1   7  12
OMIT      3   6  15
OMIT      2   7  15
OMIT      5   7  12
OMIT      2   8  13
OMIT      3   4  16
OMIT      5   4  15
OMIT      5   3  14
OMIT      5   0  15
OMIT      2   6  14
OMIT     3   3  12
OMIT     1   7  14
OMIT     3   3  14
OMIT     5   2  14
OMIT     1   0   3
OMIT     1   1   5
OMIT     5   1  13
OMIT     0  12  13
OMIT     3   6  16
OMIT     0  12  15
L.S. 15
ACTA
BOND
FMAP 2
SIZE 0.48 0.42 0.40
isor 0.01 o8
PLAN 20
BIND Cu1  Cl1
TEMP 25
ABIN
WGHT    0.000262  159.987640
FVAR       0.21340
HO1   7    1.481454    0.652318    0.674968    11.00000    0.04259    0.03379 =
         0.04509    0.00266    0.01141    0.00223
CU1   6    1.292716    0.571074    0.804803    11.00000    0.05761    0.03660 =
         0.05098    0.00126    0.02035   -0.00200
CL1   5    1.004060    0.579136    0.744503    11.00000    0.04126    0.05477 =
         0.08950    0.00277    0.01534   -0.00099
O1    4    1.355785    0.677800    0.775197    11.00000    0.06284    0.03351 =
         0.05013   -0.02098    0.02441   -0.01143
O2    4    1.399042    0.534033    0.726801    11.00000    0.05101    0.02643 =
         0.06593   -0.01196    0.02208   -0.00033
O3    4    1.507982    0.796174    0.727956    11.00000    0.05860    0.03194 =
         0.05717    0.00076    0.01612   -0.00069
O4    4    1.573198    0.516403    0.628542    11.00000    0.06802    0.02963 =
         0.04836   -0.00325    0.01350   -0.00030
O5    4    1.418226    0.763491    0.599708    11.00000    0.07584    0.04794 =
         0.05831   -0.00016    0.00205    0.00359
O6    4    1.460377    0.649036    0.553455    11.00000    0.06665    0.03894 =
         0.09498    0.00107    0.02995    0.01538
O7    4    1.411638    0.756555    0.489513    11.00000    0.10821    0.10425 =
         0.05806    0.05181    0.00966    0.03048
O8    4    1.219250    0.635490    0.643591    11.00000    0.03664    0.09640 =
         0.07420    0.00503   -0.00109   -0.01682
AFIX  83
H8    2    1.165489    0.623303    0.675091    11.00000   -1.50000
AFIX   0
O9    4    1.670165    0.627538    0.754928    11.00000    0.06126    0.07974 =
         0.06600    0.01297    0.02169    0.00147
AFIX   3
H9C   2    1.763026    0.614308    0.751628    11.00000   -1.20000
H9D   2    1.641506    0.614258    0.793908    11.00000   -1.20000
AFIX   0
O10   4    0.583390    0.585044    0.878207    11.00000    0.08279    0.08029 =
         0.05890   -0.00830   -0.01068   -0.00806
AFIX  83
H10A  2    0.637194    0.544170    0.877497    11.00000   -1.50000
AFIX   0
N1    3    1.201505    0.610948    0.884422    11.00000    0.05404    0.05062 =
         0.05750   -0.02230    0.01635   -0.02047
N2    3    1.277864    0.463614    0.845397    11.00000    0.05386    0.04651 =
         0.04118    0.01556    0.00125   -0.00932
N3    3    1.427696    0.723360    0.542600    11.00000    0.04445    0.07012 =
         0.03511    0.03065    0.00144    0.00682
N4    3    1.721275    0.696363    0.631443    11.00000    0.05056    0.05985 =
         0.06443   -0.00844    0.01440   -0.00144
N5    3    1.895712    0.789860    0.575516    11.00000    0.11470    0.05892 =
         0.13949    0.00359    0.06205   -0.02260
N6    3    1.859340    0.935633    0.564998    11.00000    0.14136    0.08881 =
         0.06932   -0.01018   -0.00091   -0.03393
AFIX   9
C1    1    1.365612    0.741242    0.813912    11.00000    0.04322    0.03015 =
         0.06508   -0.01144    0.01694    0.00518
C2    1    1.449322    0.809444    0.792610    11.00000    0.05749    0.03934 =
         0.05660   -0.00243    0.00419    0.00783
C3    1    1.467613    0.878975    0.830075    11.00000    0.08569    0.04163 =
         0.05392   -0.00383    0.00972   -0.02051
AFIX  43
H3    2    1.526897    0.921950    0.815046    11.00000   -1.20000
AFIX   5
C4    1    1.396668    0.883658    0.890040    11.00000    0.11963    0.06003 =
         0.06671   -0.01366    0.02466   -0.00208
AFIX  43
H4    2    1.402281    0.931554    0.915148    11.00000   -1.20000
AFIX   5
C5    1    1.318912    0.819527    0.912924    11.00000    0.08711    0.06263 =
         0.06519   -0.00767    0.01784    0.00644
AFIX  43
H5    2    1.276261    0.823422    0.955073    11.00000   -1.20000
AFIX   5
C6    1    1.298998    0.748149    0.877157    11.00000    0.05565    0.04382 =
         0.04861   -0.01062    0.01083    0.00562
C7    1    1.213678    0.682811    0.906128    11.00000    0.05156    0.05976 =
         0.03801   -0.00536    0.00589    0.00889
AFIX  43
H7    2    1.162012    0.694980    0.945048    11.00000   -1.20000
AFIX   0
C8    1    1.118927    0.545968    0.918722    11.00000    0.05324    0.06460 =
         0.05948    0.00316    0.02627   -0.01140
AFIX  23
H8A   2    1.019399    0.537999    0.897623    11.00000   -1.20000
H8B   2    1.106044    0.559876    0.965632    11.00000   -1.20000
AFIX   0
C9    1    1.216374    0.467492    0.912567    11.00000    0.07693    0.05234 =
         0.07322    0.01045    0.02193   -0.01148
AFIX  23
H9A   2    1.298709    0.468287    0.945975    11.00000   -1.20000
H9B   2    1.154243    0.419687    0.920505    11.00000   -1.20000
AFIX   9
C10   1    1.332549    0.399487    0.822282    11.00000    0.04965    0.04555 =
         0.04701    0.01428   -0.00396   -0.01618
AFIX  43
H10   2    1.318365    0.351902    0.846888    11.00000   -1.20000
AFIX   5
C11   1    1.416191    0.391992    0.760675    11.00000    0.03618    0.03964 =
         0.06080   -0.00491   -0.00727    0.00043
C12   1    1.449740    0.457447    0.717792    11.00000    0.03225    0.03238 =
         0.09222   -0.00969    0.01981   -0.00271
C13   1    1.544723    0.445567    0.663761    11.00000    0.04930    0.03953 =
         0.04473    0.00311   -0.00140   -0.00259
C14   1    1.598603    0.369736    0.649615    11.00000    0.05213    0.03951 =
         0.08321   -0.01084    0.02776    0.00138
AFIX  43
H14   2    1.662184    0.361929    0.613588    11.00000   -1.20000
AFIX   5
C15   1    1.557736    0.304217    0.689470    11.00000    0.07857    0.03800 =
         0.08793   -0.00721    0.00719    0.00808
AFIX  43
H15   2    1.586875    0.251633    0.677657    11.00000   -1.20000
AFIX   5
C16   1    1.476732    0.315696    0.744834    11.00000    0.07165    0.04907 =
         0.05875   -0.00045   -0.00857   -0.00781
AFIX  43
H16   2    1.460457    0.271753    0.773399    11.00000   -1.20000
AFIX   0
C17   1    1.591497    0.864115    0.701153    11.00000    0.05578    0.04179 =
         0.08495    0.01355    0.00824   -0.00188
AFIX 137
H17A  2    1.533213    0.913306    0.705578    11.00000   -1.50000
H17B  2    1.610327    0.854464    0.654504    11.00000   -1.50000
H17C  2    1.686510    0.869774    0.725547    11.00000   -1.50000
AFIX   0
C18   1    1.671771    0.507856    0.572662    11.00000    0.07903    0.05810 =
         0.10229    0.00197    0.05125    0.01060
AFIX 137
H18A  2    1.774040    0.499020    0.589029    11.00000   -1.50000
H18B  2    1.667740    0.556703    0.545949    11.00000   -1.50000
H18C  2    1.639460    0.462129    0.545636    11.00000   -1.50000
AFIX   0
C19   1    1.800018    0.744199    0.603370    11.00000    0.07094    0.06996 =
         0.05012   -0.03669    0.00570   -0.02209
C20   1    1.870709    0.866726    0.571222    11.00000    0.06966    0.08076 =
         0.09225    0.01047    0.02228   -0.02229
C21   1    1.136014    0.626735    0.582970    11.00000    0.05783    0.12146 =
         0.11805   -0.03036    0.01782   -0.02346
AFIX 137
H21A  2    1.092149    0.678371    0.570287    11.00000   -1.50000
H21B  2    1.056621    0.587318    0.588625    11.00000   -1.50000
H21C  2    1.202241    0.608517    0.548463    11.00000   -1.50000
AFIX   0
C22   1    0.646198    0.641919    0.924358    11.00000    0.11050    0.10510 =
         0.09132    0.00472   -0.03852   -0.00752
AFIX 137
H22A  2    0.631933    0.696236    0.907092    11.00000   -1.50000
H22B  2    0.752839    0.631327    0.930859    11.00000   -1.50000
H22C  2    0.596594    0.636926    0.966554    11.00000   -1.50000

AFIX   0
HKLF 4

REM  180204f in P2(1)/n
REM R1 =  0.0901 for    2754 Fo > 4sig(Fo)  and  0.1692 for all    4984 data
REM    346 parameters refined using      6 restraints

END

WGHT      0.0994      0.0000

REM Highest difference peak  2.671,  deepest hole -3.211,  1-sigma level  0.239
Q1    1   1.4523  0.6520  0.6116  11.00000  0.05    2.67
Q2    1   1.5145  0.6528  0.7382  11.00000  0.05    2.61
Q3    1   1.4059  0.6503  0.6926  11.00000  0.05    2.55
Q4    1   1.5570  0.6514  0.6581  11.00000  0.05    2.48
Q5    1   1.4857  0.7067  0.6453  11.00000  0.05    1.63
Q6    1   1.4867  0.5950  0.6472  11.00000  0.05    1.53
Q7    1   1.4800  0.7102  0.7019  11.00000  0.05    1.51
Q8    1   1.4751  0.5970  0.7017  11.00000  0.05    1.43
Q9    1   1.5984  0.6023  0.7131  11.00000  0.05    1.28
Q10   1   1.5794  0.6583  0.5529  11.00000  0.05    1.26
Q11   1   1.3667  0.7000  0.6350  11.00000  0.05    1.24
Q12   1   1.5865  0.7040  0.7157  11.00000  0.05    1.21
Q13   1   1.3584  0.6032  0.6325  11.00000  0.05    1.18
Q14   1   1.2644  0.5748  0.7310  11.00000  0.05    1.08
Q15   1   1.2945  0.6494  0.6715  11.00000  0.05    1.05
Q16   1   1.6605  0.6484  0.6800  11.00000  0.05    1.03
Q17   1   1.7276  0.7055  0.7142  11.00000  0.05    1.03
Q18   1   1.3828  0.5590  0.7876  11.00000  0.05    1.01
Q19   1   1.2378  0.6950  0.6286  11.00000  0.05    0.91
Q20   1   1.0291  0.5805  0.7992  11.00000  0.05    0.91
;
_shelx_res_checksum    4913
# start Validation Reply Form
_vrf_PLAT780_Cu-Ho-valen-dca              
;
PROBLEM: Coordinates do not Form a Properly Connected Set 
RESPONSE: It has been checked that all the atoms form a connected set. 
No action is taken.
; 
# start Validation Reply Form 
_vrf_PLAT971_Cu-Ho-valen-dca
;
PROBLEM: Check Calcd Positive Resid. Dens.1.19Ang From O6       2.57 eA-3  
RESPONSE: Small randomly oriented second fragment caused 
this difference Fourier peak not part of the correct crystal 
structure. 
;
# start Validation Reply Form 
_vrf_PLAT973_Cu-Ho-valen-dca
;
PROBLEM: Check Calcd Positive Resid. Density on       Ho1       2.00 eA-3  
RESPONSE: Ho1 is a heavy atom and this alert is often found for molecules 
of this type.
; 
_shelx_hkl_file
;
   2   0   0 2828.50  184.38
   2   0   0 2848.24  198.57
   3   0   0   -2.96    6.42
   3   0   0   -7.64    5.04
   4   0   0 1514.31  103.86
   4   0   0 1557.76  113.89
   5   0   0   -1.14   10.41
   5   0   0   21.72   11.97
   6   0   0  501.92   47.40
   6   0   0  462.02   40.34
   7   0   0   -8.49   12.73
   7   0   0   -4.67   11.39
   8   0   0   66.46   23.63
   8   0   0   62.78   23.55
   9   0   0  -32.41   19.90
   9   0   0  -15.76   17.71
  10   0   0  101.06   38.13
  10   0   0   78.85   34.17
  11  -1   0  -25.71   28.56
  10  -1   0   69.11   33.06
  10  -1   0   49.19   31.59
   9  -1   0  -13.48   18.81
   9  -1   0  -19.47   19.16
   8  -1   0  101.40   28.37
   8  -1   0   99.82   26.56
   7  -1   0   -0.02   13.41
   7  -1   0    7.15   14.39
   6  -1   0  218.07   23.24
   6  -1   0  236.79   29.42
   5  -1   0  195.52   20.16
   5  -1   0  187.54   25.16
   4  -1   0  601.39   44.32
   4  -1   0  615.31   50.70
   3  -1   0    4.32    6.27
   3  -1   0    4.11    6.15
   2  -1   0 1278.95   91.89
   2  -1   0 1271.02   83.86
   1   1   0 3763.89  243.22
   3   1   0   -0.06    5.82
   3   1   0   22.79    7.50
   4   1   0  618.71   47.83
   4   1   0  690.44   53.74
   5   1   0  202.86   21.02
   5   1   0  202.55   25.12
   6   1   0  242.50   26.73
   6   1   0  270.86   31.82
   7   1   0   -2.36   12.77
   7   1   0   -4.25   13.47
   8   1   0  133.05   31.09
   8   1   0  117.77   27.89
   9   1   0  -45.05   21.06
   9   1   0   -3.27   19.96
  10   1   0   41.70   33.77
  11  -2   0  137.84   48.40
  10  -2   0  -17.41   20.61
   9  -2   0  115.21   29.73
   9  -2   0  107.18   33.05
   8  -2   0  -14.66   15.76
   8  -2   0   13.36   16.88
   7  -2   0  149.06   20.02
   7  -2   0  171.93   27.67
   6  -2   0   63.26   15.56
   6  -2   0   45.73   19.84
   5  -2   0  325.96   34.55
   5  -2   0  355.70   28.95
   4  -2   0   16.16   10.70
   4  -2   0   39.26   10.93
   3  -2   0  122.20   11.91
   3  -2   0  112.71   14.93
   2  -2   0  762.46   57.85
   2  -2   0  774.60   51.36
   1  -2   0  813.12   59.30
   0  -2   0  316.82   27.77
   1   2   0  884.37   64.17
  -1  -2   0 1045.19   81.37
  -2  -2   0  808.27   70.54
   2   2   0  832.64   56.00
   2   2   0  804.57   59.01
   3   2   0  205.31   17.43
   3   2   0  134.68   17.63
   4   2   0   37.95   11.50
   4   2   0   28.01   12.44
   5   2   0  380.76   34.48
   5   2   0  426.76   38.66
   6   2   0   32.25   17.35
   6   2   0   60.30   16.39
   6   2   0   35.75   17.35
   7   2   0  208.16   30.37
   7   2   0  221.31   27.10
   8   2   0    1.84   19.08
   8   2   0   36.70   20.63
   9   2   0  161.26   36.59
   9   2   0   91.84   34.14
  10   2   0  -39.26   25.48
  11   2   0  -40.37   37.12
  11  -3   0  -24.28   26.88
  10  -3   0   21.49   25.40
   9  -3   0   27.71   25.70
   8  -3   0   -0.67   13.52
   8  -3   0   -5.15   17.15
   7  -3   0  382.05   34.68
   7  -3   0  409.78   44.87
   6  -3   0  130.07   26.37
   6  -3   0  102.45   15.72
   5  -3   0  393.90   32.39
   5  -3   0  426.09   40.56
   4  -3   0   59.94   10.28
   3  -3   0 1511.26  113.97
   3  -3   0 1591.61  102.60
   2  -3   0  490.93   40.42
   2  -3   0  520.10   34.53
   1  -3   0 1928.31  136.62
   0  -3   0    0.19    2.05
   1   3   0 2014.47  137.21
  -1  -3   0 2169.87  174.04
   2   3   0  538.61   39.70
  -2  -3   0  567.03   49.11
   3   3   0 1743.22  115.60
  -3  -3   0 1505.73  137.33
   3   3   0 1584.12  108.68
  -4  -3   0   41.44   19.40
   4   3   0   82.11   14.21
   4   3   0   61.05   14.39
   5   3   0  480.98   42.02
   5   3   0  436.97   38.63
   6   3   0  125.64   22.26
   6   3   0  106.52   18.21
   7   3   0  445.26   42.65
   7   3   0  460.90   47.37
   8   3   0   -7.57   16.20
   8   3   0   20.69   23.36
   9   3   0    8.47   25.80
  10   3   0  -43.37   30.48
  11  -4   0  -27.97   27.67
  10  -4   0  -13.80   17.56
   9  -4   0   69.05   28.89
   8  -4   0   41.47   22.56
   7  -4   0   45.76   14.75
   7  -4   0   52.93   21.07
   6  -4   0  423.48   43.57
   6  -4   0  409.21   34.09
   5  -4   0   52.00   13.01
   5  -4   0   52.17   17.11
   4  -4   0  687.35   47.12
   4  -4   0  633.61   55.60
   3  -4   0  519.44   44.58
   3  -4   0  535.23   37.33
  -2   4   0  887.64   54.47
   2  -4   0  731.40   61.48
   1  -4   0   65.69    9.17
   0  -4   0 3155.90  210.36
   0   4   0 2949.58  196.14
   0  -4   0 2909.29  248.38
  -1  -4   0   70.86    9.05
   1   4   0   62.65    8.47
   2   4   0  911.40   67.32
  -2  -4   0 1043.69   84.44
   3   4   0  690.48   53.18
   4   4   0  750.03   54.80
  -4  -4   0  667.50   68.19
   4   4   0  763.74   56.78
   5   4   0  106.61   19.27
   5   4   0   73.72   16.20
  -5  -4   0   42.86   23.57
   6   4   0  477.27   43.75
   6   4   0  523.98   46.29
   7   4   0  102.52   26.74
   7   4   0   46.22   20.32
   8   4   0  108.80   29.48
   9   4   0   26.14   30.69
  10   4   0  -46.62   25.50
  11  -5   0  -29.25   23.90
  10  -5   0   65.19   32.95
   9  -5   0  -20.40   17.78
   7  -5   0   42.70   20.76
   6  -5   0   79.29   15.45
   6  -5   0   86.30   23.00
   5  -5   0   -0.82    8.71
   5  -5   0    3.73   11.55
   4  -5   0  952.43   65.21
   4  -5   0  934.77   75.89
   3  -5   0  167.23   20.92
   2  -5   0  157.57   17.83
  -2   5   0  159.30   14.62
   1  -5   0  205.34   20.19
   0   5   0   31.77    8.49
   0  -5   0   25.21    6.94
  -1  -5   0  229.72   21.90
   1   5   0  243.41   20.48
  -1  -5   0  223.58   23.20
   2   5   0  172.49   16.79
  -2  -5   0  166.23   18.76
  -3  -5   0  248.27   26.34
   3   5   0  197.07   21.56
   4   5   0 1119.36   79.26
   4   5   0 1126.55   82.08
  -4  -5   0 1037.09   97.58
  -5  -5   0  -10.07   13.13
   5   5   0   19.14   12.45
   6   5   0  146.77   27.12
   6   5   0   90.15   18.97
   7   5   0   76.18   26.00
   8   5   0  394.21   43.63
   9   5   0  -32.66   27.48
  10   5   0   10.83   34.53
  11  -6   0   -5.34   28.60
  10  -6   0  -31.80   21.19
   9  -6   0   24.03   23.21
   8  -6   0   35.27   22.53
   7  -6   0   65.21   24.37
   6  -6   0  171.09   26.95
   5  -6   0  203.99   26.75
   5  -6   0  166.13   18.43
   4  -6   0  320.68   33.53
  -3   6   0  -11.41    7.49
   3  -6   0    3.30    7.26
   2  -6   0 1277.94   91.20
  -2   6   0 1126.46   84.71
   1  -6   0   -3.75    5.97
   0  -6   0  171.17   20.14
   0  -6   0  208.78   19.05
   0   6   0  202.76   17.91
  -1  -6   0   -1.31    4.88
   1   6   0    3.11    6.40
  -1  -6   0   -4.33    3.67
  -2  -6   0 1377.99  118.72
   2   6   0 1389.46   95.26
   3   6   0    3.20    9.40
  -3  -6   0   -1.02    7.32
   4   6   0  405.46   35.11
  -4  -6   0  377.23   40.87
   5   6   0  191.04   21.99
  -5  -6   0  185.62   29.60
   5   6   0  239.28   25.62
   6   6   0  254.51   29.83
   7   6   0   93.59   28.42
   8   6   0   82.83   30.12
   9   6   0   -1.02   29.84
  10   6   0  -55.07   28.09
  10  -7   0  -21.34   20.94
   9  -7   0   -5.68   19.19
   8  -7   0    3.44   19.46
   7  -7   0  463.44   51.75
   6  -7   0   -2.16   12.05
   5  -7   0  249.91   31.14
   4  -7   0    2.12   10.97
  -4   7   0   -5.80    9.14
  -3   7   0 2452.02  158.07
   3  -7   0 2271.37  172.11
  -2   7   0    0.75   12.70
   2  -7   0   26.25    9.83
  -1   7   0 1819.41  121.44
   1  -7   0 1791.93  152.65
   1  -7   0 1807.91  131.17
   0  -7   0   -6.40    5.64
   0   7   0   16.08   10.19
   0  -7   0   -5.36    4.83
  -1  -7   0 1962.24  136.17
  -1  -7   0 1814.97  160.67
   1   7   0 1932.38  128.11
   2   7   0   23.59   11.00
  -2  -7   0    9.66    8.18
  -2  -7   0   21.20   10.47
   3   7   0 2383.47  168.31
  -3  -7   0 2620.40  212.26
  -4  -7   0   -5.05   10.03
   4   7   0   28.50   15.47
  -5  -7   0  310.45   37.97
   5   7   0  305.52   32.50
   6   7   0    9.43   15.61
   7   7   0  517.20   50.49
   8   7   0   40.82   30.47
   9   7   0  -18.74   28.56
  11   7   0  -63.60   37.12
  10  -8   0  -18.03   23.58
   9  -8   0    6.57   23.10
   8  -8   0  -12.50   17.60
   7  -8   0   68.34   23.60
   6  -8   0   -7.40   12.17
   5  -8   0  102.56   20.10
   4  -8   0  105.85   18.79
  -3   8   0  395.63   40.61
   3  -8   0  502.11   42.89
   2  -8   0   85.72   14.09
  -2   8   0   41.62   18.16
   2  -8   0   86.46   17.31
   1  -8   0    4.28    5.85
   1  -8   0   10.08    8.58
  -1   8   0   -1.36    9.71
   0   8   0    8.57    9.38
   0  -8   0   -1.25    5.77
   0  -8   0   -2.65    7.32
  -2  -8   0   59.32   13.07
  -2  -8   0   55.45   13.63
  -3  -8   0  570.15   54.01
   3   8   0  538.42   44.88
  -4  -8   0  131.78   22.30
   4   8   0  149.77   21.63
  -5  -8   0   98.65   22.02
   5   8   0  138.78   26.38
   6   8   0   28.59   18.60
   7   8   0  157.20   37.05
   8   8   0  -27.59   21.62
   9   8   0   28.02   36.78
  10   8   0  -64.74   30.97
  10  -9   0  -12.55   24.91
   9  -9   0   -2.70   19.65
   8  -9   0   37.02   25.47
   7  -9   0   16.60   18.86
   6  -9   0   26.59   17.35
   5  -9   0  416.17   40.34
   5  -9   0  342.66   40.03
   4  -9   0  280.79   33.51
   4  -9   0  337.15   34.07
   3  -9   0  324.78   33.47
   3  -9   0  308.05   33.52
  -2   9   0    6.09   12.18
   2  -9   0   23.90    8.52
   2  -9   0   23.44   11.12
   1  -9   0  836.30   68.77
  -1   9   0  901.73   63.16
   1  -9   0  907.28   79.09
   0   9   0    8.43    8.23
   0  -9   0    1.15    7.27
   0  -9   0    4.39    6.54
  -1  -9   0  982.02   68.73
   1   9   0  899.53   65.93
  -1  -9   0  832.25   80.50
  -2  -9   0   17.38    8.94
  -2  -9   0   15.66   10.57
   3   9   0  386.31   34.84
  -3  -9   0  348.07   38.99
  -4  -9   0  415.80   45.34
   4   9   0  415.39   39.52
   5   9   0  569.28   51.71
  -5  -9   0  630.18   62.55
   6   9   0   46.43   22.11
   7   9   0    3.78   22.64
   8   9   0   83.36   35.87
   9   9   0  -36.86   28.61
  10   9   0  -54.51   38.33
  10 -10   0  -40.92   22.69
   9 -10   0  -20.30   19.22
   8 -10   0   -3.35   18.05
   7 -10   0    4.97   17.90
   6 -10   0  124.10   28.43
   5 -10   0   10.49   11.30
   5 -10   0    8.71   12.57
   4 -10   0  364.27   38.34
   4 -10   0  337.63   37.45
   3 -10   0   60.68   15.01
   3 -10   0   74.18   17.84
   2 -10   0  544.91   48.35
   2 -10   0  572.71   53.90
   1 -10   0  194.06   23.64
  -1  10   0  189.35   19.56
   1 -10   0  187.29   22.45
   0 -10   0 1348.43  100.14
   0 -10   0 1284.83  117.42
   0  10   0 1412.06   93.62
   1  10   0  237.78   24.52
  -1 -10   0  206.22   27.31
  -1 -10   0  257.98   23.23
   2  10   0  562.67   46.63
  -2 -10   0  601.44   56.26
   3  10   0  100.55   21.17
  -3 -10   0   69.04   17.79
   4  10   0  350.27   35.80
  -4 -10   0  370.82   41.94
  -5 -10   0    4.69   14.42
   5  10   0   31.90   21.24
   6  10   0  212.71   38.30
   7  10   0   17.38   29.46
   8  10   0   39.39   36.38
   9 -11   0  -34.70   20.85
   8 -11   0    2.97   20.00
   7 -11   0   21.23   20.51
   6 -11   0  261.06   35.95
   5 -11   0   77.87   22.37
   5 -11   0   96.41   19.84
   4 -11   0   -2.32    7.86
   4 -11   0    5.80   12.68
   3 -11   0  202.30   26.71
   3 -11   0  247.19   29.54
   2 -11   0  276.79   29.96
   2 -11   0  276.08   31.78
   1 -11   0  225.04   24.90
   1 -11   0  245.14   29.10
   0 -11   0    5.56    7.86
   0  11   0    8.97    9.59
   0 -11   0    4.28    7.48
   1  11   0  248.48   25.70
  -1 -11   0  236.72   29.59
  -1 -11   0  266.21   24.46
   2  11   0  294.63   29.37
  -2 -11   0  274.14   33.41
  -3 -11   0  235.78   30.30
   3  11   0  248.07   28.31
  -4 -11   0   -3.09   11.54
   4  11   0    0.30   17.10
   5  11   0  140.58   29.96
  -5 -11   0   74.49   24.98
  -6 -11   0  313.23   43.09
   6  11   0  320.95   38.97
   7  11   0   16.90   32.46
   8  11   0   -4.55   30.71
   9 -12   0  -11.00   22.58
   8 -12   0  -12.69   18.33
   7 -12   0   57.48   26.15
   6 -12   0  123.11   29.71
   5 -12   0  232.05   30.50
   5 -12   0  183.61   28.87
   4 -12   0  193.52   27.23
   4 -12   0  186.94   28.19
   3 -12   0   48.62   16.12
   3 -12   0   47.51   16.35
   2 -12   0   49.72   15.32
   2 -12   0   73.50   17.55
   1 -12   0  241.63   26.49
   1 -12   0  240.73   29.60
   0 -12   0  186.09   21.81
   0 -12   0  189.07   25.65
  -1 -12   0  243.23   30.44
   1  12   0  267.04   27.00
  -2 -12   0   54.65   15.21
   2  12   0   48.92   18.07
   3  12   0   82.37   22.09
  -3 -12   0   48.94   16.98
   4  12   0  184.20   27.80
  -4 -12   0  169.69   29.01
  -5 -12   0  221.87   33.55
   5  12   0  241.26   32.98
   6  12   0  181.35   41.33
  -6 -12   0  116.72   29.92
   7  12   0  119.58   40.52
   8  12   0  -54.12   30.55
   9  12   0  -42.49   42.34
   9 -13   0   -8.99   24.59
   8 -13   0  -16.24   22.69
   7 -13   0    2.90   20.13
   6 -13   0   22.59   19.80
   5 -13   0  311.15   39.59
   5 -13   0  372.05   42.71
   4 -13   0    9.39   13.08
   4 -13   0   24.32   16.27
   3 -13   0  152.44   25.34
   3 -13   0  121.66   20.91
   2 -13   0   11.48   10.51
   2 -13   0    3.00   10.89
   1 -13   0  484.22   43.81
   1 -13   0  508.05   51.43
   0 -13   0   -2.22    8.90
  -1 -13   0  472.85   48.92
  -2 -13   0   -8.08    9.67
   2  13   0   16.48   14.25
   3  13   0  159.09   24.51
  -3 -13   0  137.60   24.66
   4  13   0   -6.08   18.81
  -4 -13   0    6.16   13.29
  -5 -13   0  351.95   46.23
   5  13   0  384.47   42.56
   6  13   0   77.92   34.42
   7  13   0   -8.18   35.16
   8 -14   0  -24.61   21.03
   7 -14   0   25.82   23.90
   6 -14   0   53.82   23.21
   5 -14   0   48.74   20.62
   5 -14   0   29.95   17.63
   4 -14   0  257.84   33.79
   4 -14   0  267.15   36.25
   3 -14   0    1.11   13.27
   3 -14   0   12.41   14.23
   2 -14   0  163.22   27.10
   2 -14   0  186.99   24.87
   1 -14   0   -8.21   12.07
   0 -14   0  311.57   37.67
  -1 -14   0   -1.59   10.22
   2  14   0  162.32   24.57
  -2 -14   0  168.44   26.23
   3  14   0    3.32   19.22
  -3 -14   0   -5.47   10.92
  -4 -14   0  254.12   35.22
   4  14   0  254.39   33.74
   5  14   0   62.76   30.34
  -5 -14   0   62.62   22.76
   6  14   0  116.18   39.99
   7  14   0   29.86   35.70
   8  14   0  -56.84   33.28
   8 -15   0  -27.95   21.67
   7 -15   0   10.56   20.83
   6 -15   0   66.69   27.06
   5 -15   0    7.23   16.16
   5 -15   0   10.46   17.28
   4 -15   0   49.27   20.18
   4 -15   0   28.59   17.37
   3 -15   0  110.55   21.75
   3 -15   0  121.94   25.66
   2 -15   0    8.04   11.14
   2 -15   0   -7.21   13.64
   1 -15   0   27.64   16.02
   0 -15   0  -14.27   12.25
  -1 -15   0   25.16   16.34
  -2 -15   0   -0.97   13.02
  -3 -15   0   97.03   22.10
   3  15   0  145.38   31.88
   4  15   0   29.01   25.55
  -4 -15   0   48.73   19.68
   5  15   0  -24.51   25.21
  -5 -15   0    6.28   16.41
   6  15   0  115.31   42.97
   7  15   0   -7.55   34.94
   8  15   0  -64.14   39.88
   7 -16   0   12.82   20.67
   6 -16   0   21.57   22.69
   5 -16   0   55.13   22.76
   5 -16   0   25.20   19.94
   4 -16   0  120.95   23.31
   4 -16   0  141.46   27.04
   3 -16   0    2.40   13.62
   3 -16   0    0.09   14.33
   2 -16   0  337.23   42.72
   1 -16   0   33.76   17.43
   0 -16   0   77.74   21.51
  -1 -16   0   26.35   16.70
  -2 -16   0  338.87   41.60
  -3 -16   0    1.44   12.80
  -4 -16   0  113.07   24.01
   5  16   0   12.46   31.24
  -5 -16   0   39.11   19.20
   6  16   0   -6.32   35.53
   7  16   0  -50.50   32.61
   7 -17   0  -19.92   18.63
   6 -17   0  -13.25   19.03
   5 -17   0   31.49   19.39
   5 -17   0   14.24   19.81
   4 -17   0   59.66   21.90
   4 -17   0   38.65   20.37
   3 -17   0  131.93   27.47
   2 -17   0   21.58   17.01
   1 -17   0  188.04   31.81
   0 -17   0  -14.99   13.28
  -1 -17   0  131.55   25.63
  -2 -17   0    4.19   14.36
  -3 -17   0  109.89   24.72
  -4 -17   0   54.31   20.61
  -5 -17   0   16.05   19.63
   7  17   0  -61.68   32.46
   6 -18   0  -16.56   19.53
   5 -18   0   43.99   22.54
   5 -18   0   40.00   23.26
   4 -18   0    6.51   18.48
   3 -18   0   86.14   25.95
   2 -18   0   19.68   19.18
   1 -18   0    4.39   15.88
   0 -18   0   41.74   20.03
  -1 -18   0    0.04   17.30
  -2 -18   0   22.12   16.57
  -3 -18   0   98.56   25.91
  -4 -18   0   13.89   18.07
  -5 -18   0   33.37   21.00
   4 -19   0   19.29   22.73
   3 -19   0  155.04   33.06
   2 -19   0    4.77   18.39
   1 -19   0  141.85   33.77
   0 -19   0  -10.79   17.07
  -1 -19   0  115.68   26.87
  -2 -19   0    2.63   17.04
  -3 -19   0  139.47   29.12
  -4 -19   0   34.01   21.82
  -5 -19   0   42.28   23.44
   4 -20   0   49.06   26.76
   3 -20   0   -3.57   20.93
   2 -20   0  170.53   34.39
   1 -20   0   -4.80   18.64
   0 -20   0   61.92   24.63
  -1 -20   0    2.00   16.40
  -2 -20   0  155.70   29.91
  -3 -20   0   17.38   18.20
  -4 -20   0   29.56   21.39
   3 -21   0   30.13   25.86
   2 -21   0   -9.53   17.09
   1 -21   0   21.45   22.25
   0 -21   0  -15.97   19.51
  -1 -21   0   20.79   21.68
  -2 -21   0    7.66   17.63
  -3 -21   0   50.01   22.23
  -3 -21   1  132.39   31.72
  -2 -21   1   -1.04   17.07
  -1 -21   1   70.87   25.55
   0 -21   1   -8.02   17.47
   1 -21   1  107.42   35.12
   2 -21   1    0.62   21.48
   3 -21   1   71.39   30.89
  -4 -20   1    6.60   15.84
  -3 -20   1   -2.05   17.85
  -2 -20   1   13.02   19.56
  -1 -20   1   53.16   24.96
   0 -20   1   23.23   22.73
   1 -20   1   11.18   18.44
   2 -20   1   11.19   21.25
   3 -20   1   81.55   28.46
   4 -20   1   18.93   22.99
  -5 -19   1   29.20   20.81
  -4 -19   1    2.14   15.26
  -3 -19   1   73.52   24.67
  -2 -19   1    9.05   16.59
  -1 -19   1   53.99   21.89
   0 -19   1   26.34   20.00
   1 -19   1    4.33   17.60
   2 -19   1   15.87   20.53
   3 -19   1   64.27   25.17
   4 -19   1   92.40   30.30
   5 -19   1    0.94   19.87
  -5 -18   1    7.99   17.87
  -4 -18   1   80.14   24.19
  -3 -18   1    1.67   13.63
  -2 -18   1  347.97   44.81
  -1 -18   1    0.14   16.63
   0 -18   1   28.78   18.29
   1 -18   1    5.95   15.36
   2 -18   1  159.08   30.72
   3 -18   1    3.61   16.95
   4 -18   1   25.51   21.13
   5 -18   1   17.71   20.33
   5 -18   1   -3.49   18.18
   6 -18   1   -4.84   20.82
   7  17  -1   24.26   45.06
   6  17  -1  -46.16   32.44
  -5 -17   1   15.83   17.90
  -4 -17   1   12.25   14.89
  -3 -17   1  130.14   25.04
  -2 -17   1   17.48   15.47
  -1 -17   1   74.31   22.18
   0 -17   1   36.40   20.26
   1 -17   1  -13.53   15.49
   2 -17   1   68.52   22.83
   3 -17   1  182.92   31.85
   4 -17   1  143.39   30.04
   4 -17   1  130.69   29.27
   5 -17   1  -15.24   14.71
   5 -17   1   -7.23   15.56
   6 -17   1   34.26   23.86
   7 -17   1   -5.41   22.15
   7  16  -1  -66.16   34.36
   6  16  -1   -6.40   29.94
   5  16  -1  -24.54   21.30
  -5 -16   1    4.27   16.17
  -4 -16   1  165.31   28.94
  -3 -16   1   14.31   14.17
  -2 -16   1   14.71   14.59
  -1 -16   1   91.95   23.56
   0 -16   1  159.06   26.92
   1 -16   1   64.42   22.35
   2 -16   1   30.55   18.24
   3 -16   1  133.28   24.42
   3 -16   1  148.83   27.49
   4 -16   1   15.61   17.36
   4 -16   1   27.13   19.03
   5 -16   1  132.76   29.00
   5 -16   1  149.37   33.68
   6 -16   1  -10.20   17.06
   7 -16   1    3.54   21.87
   7  15  -1   15.64   39.14
   6  15  -1  -29.10   27.26
  -5 -15   1  187.14   31.47
   5  15  -1  201.26   32.71
  -4 -15   1   17.60   15.72
   4  15  -1   -0.04   20.93
  -3 -15   1  219.81   30.88
  -2 -15   1   -6.72   12.80
  -1 -15   1  383.38   43.99
   0 -15   1   11.54   13.41
   1 -15   1  221.03   31.79
   2 -15   1   28.67   15.41
   2 -15   1   14.64   15.01
   3 -15   1  110.76   21.32
   3 -15   1  101.17   22.98
   4 -15   1   51.91   19.95
   4 -15   1   65.32   21.78
   5 -15   1   47.21   18.98
   5 -15   1   37.66   19.60
   6 -15   1   -7.13   16.63
   7 -15   1   -7.48   19.65
   8 -15   1  -14.53   21.42
   8  14  -1  -16.68   39.38
   7  14  -1   -5.69   29.74
   6  14  -1  128.22   39.78
   5  14  -1   26.32   26.63
  -5 -14   1   33.97   18.51
   4  14  -1  207.13   29.21
  -4 -14   1  177.27   28.77
   3  14  -1  146.06   23.70
  -3 -14   1  141.18   24.07
  -2 -14   1  446.97   48.77
  -1 -14   1   39.53   16.07
   0 -14   1  582.56   59.94
   1 -14   1   55.49   18.36
   1 -14   1   82.30   19.82
   2 -14   1  475.07   46.72
   2 -14   1  499.01   53.10
   3 -14   1   11.01   13.42
   3 -14   1   23.66   16.24
   4 -14   1  139.86   25.50
   4 -14   1  158.74   27.95
   5 -14   1   78.04   23.90
   5 -14   1  108.29   23.95
   6 -14   1   23.99   21.28
   7 -14   1   33.96   23.83
   8 -14   1  -32.26   19.94
   9  13  -1  -71.39   34.32
   7  13  -1  -45.98   27.01
   6  13  -1   63.44   32.79
  -5 -13   1  109.26   27.09
   5  13  -1  126.72   29.74
   4  13  -1   92.83   26.18
  -4 -13   1   83.20   21.67
   3  13  -1    8.02   12.94
  -3 -13   1    5.83   12.04
  -2 -13   1    1.38   10.32
   2  13  -1   19.93   13.90
  -1 -13   1    7.06    9.95
   0 -13   1   72.79   16.91
   1 -13   1    1.68    9.50
   1 -13   1    0.56    8.97
   2 -13   1  324.75   36.31
   2 -13   1  259.88   31.79
   3 -13   1   11.53   13.52
   3 -13   1  -12.19   12.21
   4 -13   1   87.17   23.97
   4 -13   1  100.46   22.95
   5 -13   1   26.94   16.92
   5 -13   1   27.50   19.67
   6 -13   1  265.68   38.25
   7 -13   1   -9.41   18.09
   8 -13   1   22.88   24.80
   9 -13   1  -32.61   25.67
   8  12  -1   65.71   38.45
   7  12  -1    8.03   27.00
   6  12  -1  251.66   34.46
   5  12  -1   30.47   21.51
  -5 -12   1   18.81   15.93
   4  12  -1  908.76   70.00
  -4 -12   1  840.08   83.19
   3  12  -1   86.05   19.86
  -3 -12   1   38.36   15.91
   2  12  -1  264.25   26.66
  -2 -12   1  266.43   31.43
  -1 -12   1    6.27   10.43
   1  12  -1   11.56   10.74
   0 -12   1 1012.48   86.99
   0 -12   1  869.10   74.03
   1 -12   1  208.79   24.67
   1 -12   1  175.25   25.38
   2 -12   1  220.15   27.56
   2 -12   1  237.05   29.31
   3 -12   1   35.10   16.21
   3 -12   1   35.15   15.00
   4 -12   1  162.45   26.03
   4 -12   1  147.59   25.04
   5 -12   1    0.75   12.03
   5 -12   1   14.68   15.58
   6 -12   1   65.35   24.05
   7 -12   1   35.38   22.32
   8 -12   1  -20.74   20.28
   9 -12   1  -17.94   23.63
  10  11  -1  -69.09   39.35
   9  11  -1   25.52   41.87
   8  11  -1  -27.41   31.94
   7  11  -1   89.36   35.97
   6  11  -1   31.39   26.21
   5  11  -1  517.54   48.90
  -5 -11   1  533.34   56.94
  -4 -11   1    7.13   11.55
   4  11  -1   14.99   13.65
   3  11  -1  277.76   28.85
  -3 -11   1  280.32   33.44
   2  11  -1   92.92   18.62
  -1 -11   1  373.75   34.13
   1  11  -1  371.23   31.09
  -1 -11   1  351.93   38.19
   0 -11   1   27.51   12.24
   0  11  -1   39.67   10.68
   0 -11   1   15.64    9.71
   1 -11   1  472.81   46.11
   1 -11   1  429.24   41.28
   2 -11   1  101.51   20.99
   2 -11   1   81.88   18.47
   3 -11   1   16.02   13.26
   3 -11   1    0.54    9.71
   4 -11   1  199.39   28.62
   4 -11   1  210.51   28.25
   5 -11   1   72.47   23.13
   5 -11   1   74.77   19.41
   6 -11   1   54.80   22.53
   7 -11   1   -4.41   17.92
   8 -11   1  -10.22   20.77
   9 -11   1  -39.13   21.52
  10  10  -1  -46.37   35.13
   9  10  -1  -18.53   35.81
   8  10  -1   -1.36   32.44
   7  10  -1   31.53   28.12
   6  10  -1   47.12   25.09
  -5 -10   1  118.07   23.75
   5  10  -1  130.67   28.52
   4  10  -1  241.15   27.15
  -4 -10   1  190.47   27.83
  -3 -10   1   93.82   18.38
   3  10  -1  134.84   19.27
  -2 -10   1   -5.48    7.60
   2  10  -1    0.72    9.55
  -1 -10   1  116.89   16.95
   1  10  -1  128.12   15.62
  -1 -10   1   95.11   16.90
   0 -10   1  480.31   46.59
   0 -10   1  468.25   42.21
   0  10  -1  476.94   36.03
   1 -10   1  627.93   56.75
  -1  10  -1  713.00   47.37
   1 -10   1  701.85   63.65
   2 -10   1    5.41    9.96
   3 -10   1  571.85   52.90
   4 -10   1   59.08   20.30
   5 -10   1  215.04   31.03
   6 -10   1   27.90   18.59
   7 -10   1  106.93   30.83
   8 -10   1  -32.42   16.83
   9 -10   1   -4.21   26.86
  10 -10   1  -31.57   22.78
  10   9  -1  -52.12   32.12
   9   9  -1    4.21   31.50
   8   9  -1   -2.89   29.58
   7   9  -1  343.80   41.38
   6   9  -1   80.20   26.23
   5   9  -1  221.53   26.62
  -5  -9   1  206.48   30.32
   4   9  -1   65.18   17.89
  -4  -9   1   43.83   16.11
  -3  -9   1  787.43   71.41
   3   9  -1  753.16   58.06
  -2  -9   1   -4.11    6.93
   2   9  -1    1.74   10.09
  -2  -9   1   -6.26    9.69
  -1  -9   1 1596.16  141.54
  -1  -9   1 1702.40  122.41
   1   9  -1 1661.17  111.55
   0  -9   1   40.47   10.66
   0   9  -1   45.74    9.96
   0  -9   1   40.95   13.86
   1  -9   1  277.71   29.44
   1  -9   1  297.89   30.75
  -1   9  -1  270.65   22.00
   2  -9   1  720.14   61.09
   3  -9   1  641.53   57.21
   4  -9   1  119.99   25.32
   5  -9   1   -5.61   11.15
   6  -9   1  250.11   34.93
   7  -9   1   65.33   25.66
   8  -9   1   49.80   27.83
   9  -9   1  -27.21   20.78
  10  -9   1  -36.08   23.54
  10   8  -1  -43.86   36.95
   9   8  -1    6.88   27.89
   8   8  -1  156.23   38.96
   7   8  -1    4.51   18.74
   6   8  -1  369.28   38.83
  -5  -8   1    5.39   12.14
   5   8  -1   11.69   15.06
   4   8  -1  347.14   32.56
  -4  -8   1  366.75   38.87
   3   8  -1   69.87   15.87
  -3  -8   1   49.13   12.81
   2   8  -1 1909.36  126.87
  -2  -8   1 1747.55  139.59
  -2  -8   1 1977.94  160.25
   1   8  -1  465.40   34.31
  -1  -8   1  432.35   39.44
  -1  -8   1  435.96   42.24
   0   8  -1  914.06   59.57
   0  -8   1  891.62   76.68
   0  -8   1  791.65   67.31
   1  -8   1   13.75    9.75
  -1   8  -1   34.05    7.04
   2  -8   1  968.73   77.67
   3  -8   1  132.55   20.90
   4  -8   1   77.29   19.78
   5  -8   1   16.86   14.60
   6  -8   1   35.90   19.22
   7  -8   1   15.49   17.49
   8  -8   1   -1.96   21.03
   9  -8   1  -15.53   23.30
  10  -8   1  -29.40   25.39
  11   7  -1  -54.78   31.72
  10   7  -1  -34.06   29.77
   9   7  -1   11.12   31.13
   8   7  -1   92.29   34.14
   7   7  -1  141.69   25.13
   6   7  -1    6.81   14.26
  -5  -7   1  137.44   24.47
   5   7  -1  158.65   21.08
  -4  -7   1  276.76   33.91
   4   7  -1  333.99   30.38
   3   7  -1   57.94   14.11
  -2  -7   1  277.59   26.85
   2   7  -1  273.95   22.96
  -2  -7   1  203.24   30.57
  -1  -7   1  153.72   21.38
   1   7  -1  214.12   17.89
  -1  -7   1  184.72   20.53
   0   7  -1 1317.98   85.50
   0  -7   1 1271.79   96.21
   0  -7   1 1253.74  109.56
   1  -7   1  392.38   36.80
  -1   7  -1  406.70   28.49
   2  -7   1  157.94   20.32
   3  -7   1  229.61   27.00
  -3   7  -1  211.54   22.73
   4  -7   1 1305.14  109.65
  -4   7  -1 1509.02   94.54
   5  -7   1   21.24   15.51
   6  -7   1   97.03   24.86
   7  -7   1    6.03   17.19
   9  -7   1    0.16   24.25
  10  -7   1  -10.19   25.81
  11   6  -1  -71.53   34.04
   9   6  -1   31.74   32.21
   8   6  -1   40.06   25.26
   7   6  -1  103.17   26.27
   6   6  -1  259.76   28.60
   6   6  -1  328.04   32.42
   5   6  -1   54.49   17.86
  -5  -6   1    8.71   13.40
   5   6  -1   17.26   11.73
   4   6  -1  705.38   55.45
  -4  -6   1  770.92   68.24
  -3  -6   1   49.55   12.00
   3   6  -1   79.37   15.33
  -2  -6   1 1192.89  101.35
   2   6  -1 1160.66   80.60
  -1  -6   1 1224.18  106.01
  -1  -6   1 1257.18   95.68
   1   6  -1 1256.88   83.72
   0  -6   1  317.17   30.00
   0   6  -1  342.64   24.19
   1  -6   1   82.84   12.65
   2  -6   1  167.08   20.82
   3  -6   1  492.48   44.90
   4  -6   1  354.41   27.62
   4  -6   1  323.04   35.34
   5  -6   1  517.60   49.55
   5  -6   1  483.88   37.28
   6  -6   1   24.38   16.85
   7  -6   1  147.68   32.37
   8  -6   1    0.99   18.12
   9  -6   1   40.35   26.76
  10  -6   1  -26.54   22.81
  11   5  -1  -57.40   33.93
   9   5  -1   24.36   31.69
   8   5  -1   90.24   28.58
   7   5  -1  787.94   68.58
   7   5  -1  874.53   68.40
   6   5  -1   88.58   20.14
   6   5  -1   33.07   14.70
   5   5  -1  709.29   56.18
   5   5  -1  747.22   54.87
  -5  -5   1  611.58   66.03
   4   5  -1   37.25   13.81
   3   5  -1 2479.24  176.27
  -3  -5   1 2852.71  223.56
  -2  -5   1    5.68    5.20
   2   5  -1   12.11    6.01
  -1  -5   1 2957.68  242.56
   1   5  -1 2889.00  190.38
   0  -5   1  125.03   15.99
   0   5  -1  171.69   12.20
   1  -5   1 1227.68   91.73
   2  -5   1   21.14    8.71
   3  -5   1 1971.68  155.44
   3  -5   1 2274.46  139.27
   4  -5   1   44.20   15.62
   4  -5   1   10.40    9.46
   5  -5   1  246.55   22.10
   5  -5   1  271.47   31.87
   6  -5   1   23.27   10.67
   6  -5   1   37.04   17.79
   7  -5   1  106.80   27.40
   8  -5   1    4.45   20.24
   9  -5   1   -9.68   18.57
  10  -5   1  -12.20   24.46
  11  -5   1  -22.27   24.01
  11   4  -1  -62.64   33.13
  10   4  -1  -62.23   29.15
   9   4  -1   -0.69   27.23
   8   4  -1  110.92   28.21
   7   4  -1  123.80   26.61
   7   4  -1   76.38   23.26
   6   4  -1  396.78   38.41
   6   4  -1  358.55   35.19
  -5  -4   1   -6.34   14.37
   5   4  -1   18.75   11.22
   5   4  -1   -6.03    9.08
   4   4  -1  151.81   19.74
   4   4  -1  192.49   19.15
  -3  -4   1  280.05   28.07
   3   4  -1  279.19   23.86
   2   4  -1  315.04   24.94
  -2  -4   1  336.03   30.38
   1   4  -1   66.05    7.58
  -1  -4   1   75.55    8.69
   0   4  -1   17.90    4.88
   0  -4   1   18.84    8.80
   1  -4   1    0.80    4.48
   2  -4   1   43.75   10.61
   3  -4   1  412.20   28.69
   3  -4   1  385.42   36.76
   4  -4   1   57.45    9.77
   4  -4   1   65.88   17.13
   5  -4   1  767.03   67.04
   5  -4   1  791.00   55.39
   6  -4   1   -9.85    8.64
   6  -4   1    0.18   11.73
   7  -4   1  321.74   39.76
   7  -4   1  292.84   27.97
   8  -4   1   -1.20   17.80
   9  -4   1   78.01   29.55
  10  -4   1   -2.20   24.70
  11  -4   1   18.51   32.21
  10   3  -1   -4.98   30.51
   9   3  -1   14.80   25.00
   8   3  -1  146.66   27.02
   8   3  -1  136.36   24.99
   7   3  -1   -3.01   17.02
   7   3  -1   47.02   20.30
   6   3  -1   20.34   14.71
   6   3  -1   51.50   16.77
   5   3  -1   82.03   18.49
  -5  -3   1   21.91   35.02
   5   3  -1  102.23   18.84
   4   3  -1   -4.23    8.75
  -4  -3   1  -14.36    9.76
  -1  -3   1    9.56    3.30
   1   3  -1    4.24    3.53
   0  -3   1  826.45   62.62
   1  -3   1   14.93    6.18
   2  -3   1  303.05   20.03
   2  -3   1  263.45   25.93
   3  -3   1    3.78    4.70
   3  -3   1   -1.64    6.52
   4  -3   1 1684.38  110.96
   4  -3   1 1645.75  124.94
   5  -3   1   47.16   16.00
   5  -3   1   41.91   11.35
   6  -3   1  269.31   33.22
   6  -3   1  270.24   25.31
   7  -3   1   99.15   27.52
   7  -3   1   93.75   20.56
   8  -3   1  315.92   42.37
   8  -3   1  348.60   33.19
   9  -3   1   -7.18   18.60
  10  -3   1   68.91   33.14
  10   2  -1   42.97   34.63
   9   2  -1    2.69   21.16
   9   2  -1    6.79   25.36
   8   2  -1  326.11   37.56
   8   2  -1  352.23   42.03
   7   2  -1   16.84   16.98
   7   2  -1   56.51   20.97
   6   2  -1 1190.90   90.10
   6   2  -1 1316.64  100.20
   5   2  -1   40.17   12.70
   5   2  -1   25.08   12.80
  -4  -2   1 3523.81  299.91
   4   2  -1 3542.87  249.79
  -3  -2   1   21.87   10.19
   3   2  -1   37.96   10.90
   3   2  -1   62.69    9.35
   2   2  -1  719.61   46.34
   2   2  -1  642.68   49.69
  -2  -2   1  646.42   57.08
   1   2  -1  541.61   36.58
   1  -2   1    5.89    3.69
   2  -2   1   14.79    6.02
   2  -2   1   24.71    4.07
   3  -2   1  716.26   60.08
   3  -2   1  819.66   52.76
   4  -2   1  431.84   40.56
   4  -2   1  471.63   34.24
   5  -2   1   17.74   10.70
   5  -2   1   16.15   12.92
   6  -2   1  241.08   30.29
   6  -2   1  218.39   22.79
   7  -2   1    0.37   17.16
   7  -2   1   22.48   13.33
   8  -2   1    2.16   16.25
   8  -2   1    1.49   13.80
   9  -2   1   50.52   24.66
   9  -2   1   47.18   27.91
  10  -2   1  -20.54   23.46
  11  -2   1  -45.11   28.30
  11   1  -1  -50.25   35.03
  10   1  -1   37.99   26.81
  10   1  -1    6.63   30.92
   9   1  -1   79.50   30.89
   9   1  -1   97.49   30.72
   8   1  -1   -4.43   17.23
   8   1  -1   -7.43   17.20
   7   1  -1  257.66   27.93
   7   1  -1  237.57   32.97
   6   1  -1  146.75   19.88
   6   1  -1  179.74   25.16
   6   1  -1  179.66   25.20
   5   1  -1 1231.08   90.16
   5   1  -1 1361.73  100.26
   4   1  -1  154.77   21.03
   4   1  -1  234.17   20.35
   3   1  -1 2003.28  138.58
   3   1  -1 2203.00  150.12
   2   1  -1  933.56   62.11
   2   1  -1  917.57   67.00
   1   1  -1 1955.56  126.89
   1  -1   1 3320.96  231.70
   2  -1   1 1123.58   82.71
   2  -1   1 1137.06   74.86
   3  -1   1   45.20    9.06
   3  -1   1   30.67    9.64
   4  -1   1  111.92   17.35
   4  -1   1  142.10   14.93
   5  -1   1  118.23   18.60
   5  -1   1   90.37   14.16
   6  -1   1  336.17   31.19
   6  -1   1  362.00   38.73
   7  -1   1    2.70   14.48
   7  -1   1   27.27   16.13
   8  -1   1    5.81   18.46
   8  -1   1   26.42   19.61
   9  -1   1  -16.73   20.34
   9  -1   1  -11.48   15.49
  10  -1   1  -13.83   25.82
  10  -1   1    9.10   27.52
  11   0  -1  -22.18   34.17
  10   0  -1  -27.44   24.25
  10   0  -1  -17.99   21.19
   9   0  -1   52.86   27.16
   9   0  -1   73.17   29.26
   8   0  -1    2.26   14.63
   8   0  -1   -8.40   16.38
   7   0  -1  215.52   25.43
   7   0  -1  185.58   29.44
   6   0  -1   -3.15    9.38
   6   0  -1   -9.48   11.41
   5   0  -1  312.07   28.58
   5   0  -1  359.88   34.68
   4   0  -1   26.47   10.81
   3   0  -1 1545.71  103.77
   3   0  -1 1573.21  113.15
   2   0  -1  130.49   12.20
   1   0  -1  293.01   20.43
   1   0  -1  298.57   22.51
   2   0   1    9.17    4.39
   2   0   1    4.03    4.41
   3   0   1 1604.79  106.25
   3   0   1 1575.83  115.24
   4   0   1  -10.35    6.89
   4   0   1  -10.97    6.13
   5   0   1  733.13   54.61
   5   0   1  725.46   61.24
   6   0   1    4.38   13.70
   6   0   1   10.44   11.49
   7   0   1  419.51   45.71
   7   0   1  430.53   39.82
   8   0   1   -8.75   15.90
   8   0   1   -6.59   13.89
   9   0   1  121.71   33.93
   9   0   1  142.57   35.58
  10   0   1  -19.42   21.21
  11  -1  -1  -32.25   23.57
  10  -1  -1   35.99   26.29
  10  -1  -1   30.20   25.97
   9  -1  -1   80.29   31.84
   9  -1  -1   94.56   29.33
   8  -1  -1   -2.72   15.10
   8  -1  -1   -1.99   17.34
   7  -1  -1  201.43   24.42
   7  -1  -1  211.53   30.82
   6  -1  -1  111.85   23.68
   6  -1  -1  131.42   18.08
   5  -1  -1 1088.84   80.20
   5  -1  -1 1216.56   90.92
   3  -1  -1 2025.92  129.76
   3  -1  -1 1908.53  141.04
   2  -1  -1  914.69   58.48
   2  -1  -1  830.16   63.98
   1   1   1 3877.87  251.98
   2   1   1 1227.76   90.84
   2   1   1 1323.80   85.93
   3   1   1   71.40   10.51
   3   1   1   36.73   10.67
   4   1   1  122.22   14.69
   4   1   1  108.00   16.40
   5   1   1  126.61   16.25
   5   1   1  101.20   18.27
   6   1   1  319.81   32.34
   6   1   1  377.48   38.19
   7   1   1   24.94   17.12
   7   1   1   33.45   15.75
   8   1   1   14.20   19.76
   8   1   1   13.70   19.84
   9   1   1  -18.53   17.22
   9   1   1  -36.11   21.28
  10   1   1  -11.43   26.77
  11  -2  -1  -34.73   24.84
  10  -2  -1   98.44   39.46
   9  -2  -1    1.88   19.01
   9  -2  -1   -3.12   19.04
   8  -2  -1  278.24   30.22
   8  -2  -1  305.24   39.49
   7  -2  -1   37.20   15.46
   7  -2  -1   40.86   19.35
   6  -2  -1 1082.20   90.22
   6  -2  -1 1142.65   79.61
   5  -2  -1   12.71    8.91
   5  -2  -1    6.71   10.64
   4  -2  -1 3121.13  203.68
   4  -2  -1 3092.07  221.86
   3  -2  -1   33.71    8.83
   3  -2  -1   36.16   10.40
   2  -2  -1  607.98   46.85
   2  -2  -1  619.32   41.74
   1  -2  -1  532.87   38.81
   1  -2  -1  512.92   44.36
   0  -2  -1 4766.64  392.99
  -1  -2  -1   -4.98    3.05
   3   2   1  849.45   60.47
   4   2   1  538.07   45.48
   4   2   1  560.37   42.91
   5   2   1    9.37   10.59
   5   2   1   28.33   13.88
   6   2   1  277.43   28.59
   6   2   1  261.55   31.45
   7   2   1   35.15   18.22
   7   2   1   10.83   15.23
   8   2   1    4.62   18.38
   8   2   1    7.57   19.25
   9   2   1   21.44   28.94
  10   2   1  -37.39   30.55
  11   2   1  -67.40   32.42
  11  -3  -1  -39.82   24.65
  10  -3  -1    3.71   22.16
   9  -3  -1   -3.10   18.60
   8  -3  -1  133.25   25.04
   8  -3  -1  110.31   31.15
   7  -3  -1   19.90   15.05
   7  -3  -1   18.92   17.45
   6  -3  -1    7.20   14.14
   6  -3  -1   -1.15   10.95
   5  -3  -1   58.38   17.83
   5  -3  -1   89.99   15.97
   4  -3  -1   -4.80    8.06
   3  -3  -1  188.48   21.18
   3  -3  -1  248.70   18.73
   2  -3  -1  273.08   21.48
   2  -3  -1  322.14   25.95
   1  -3  -1    6.16    4.13
   1  -3  -1   -0.20    2.48
   0  -3  -1 1070.75   83.70
   0   3   1  905.39   68.77
   1   3   1   29.76    8.24
  -1  -3  -1   25.48    6.18
   2   3   1  329.70   27.80
  -2  -3  -1  363.40   33.98
   3   3   1    5.90    6.44
  -3  -3  -1   31.80   12.33
   3   3   1    6.49    7.37
   4   3   1 1809.23  124.17
   5   3   1   73.21   17.89
   5   3   1   30.47   14.00
   6   3   1  292.76   31.00
   6   3   1  306.69   33.25
   7   3   1   90.35   25.89
   7   3   1   93.67   24.58
   8   3   1  442.25   46.37
   8   3   1  350.68   41.41
   9   3   1  -29.67   21.29
  10   3   1   34.74   35.82
  11  -4  -1    6.52   32.21
  10  -4  -1  -19.34   19.82
   9  -4  -1   22.41   22.14
   8  -4  -1   66.23   18.44
   8  -4  -1   33.95   23.66
   7  -4  -1   92.11   25.06
   7  -4  -1   67.12   16.88
   6  -4  -1  289.19   34.14
   6  -4  -1  296.36   26.70
   5  -4  -1    6.96   10.43
   5  -4  -1   -1.26   11.66
   4  -4  -1   32.99   12.74
   4  -4  -1   48.89   11.77
   3  -4  -1  253.63   24.99
   3  -4  -1  243.17   20.52
  -2   4   1  329.01   24.45
   2  -4  -1  322.43   28.14
  -1   4   1   52.64   14.88
   1  -4  -1   72.20    8.56
   1  -4  -1   71.92    8.62
   1   4   1    6.01    7.36
  -1  -4  -1    4.18    3.83
   2   4   1  110.72   13.86
   3   4   1  461.73   34.95
  -3  -4  -1  447.27   44.63
   3   4   1  419.15   36.06
   4   4   1   86.22   15.45
   4   4   1   88.17   14.23
  -4  -4  -1  110.20   23.86
   5   4   1 1028.82   74.21
  -5  -4  -1  926.90   99.15
   5   4   1  890.68   70.98
   6   4   1   -0.51   13.02
   6   4   1  -13.71   11.39
   7   4   1  361.91   39.92
   7   4   1  421.14   41.32
   8   4   1   14.39   22.14
   9   4   1   77.60   34.31
  10   4   1  -26.53   33.90
  11  -5  -1   27.14   33.87
  10  -5  -1  -12.89   19.67
   9  -5  -1   50.10   26.39
   8  -5  -1   25.99   21.36
   7  -5  -1  644.25   62.18
   6  -5  -1   35.00   17.05
   6  -5  -1   48.13   13.99
   5  -5  -1  582.80   52.89
   5  -5  -1  606.77   44.43
   4  -5  -1    8.72   10.58
   4  -5  -1  -14.08    9.24
   3  -5  -1 2521.48  185.58
  -3   5   1 2658.57  169.93
   2  -5  -1   10.63    6.87
   2  -5  -1    9.72    4.26
  -2   5   1    9.20    8.80
   0  -5  -1  285.46   27.44
   1   5   1 1430.96   97.93
  -1  -5  -1 1399.51  120.29
  -2  -5  -1   22.55    8.86
   2   5   1   51.16   12.18
  -3  -5  -1 2167.99  181.63
   3   5   1 2093.06  144.75
  -4  -5  -1   24.23   14.68
   4   5   1   45.65   16.09
   4   5   1   40.80   11.93
   5   5   1  297.61   27.66
   5   5   1  300.35   30.20
  -5  -5  -1  262.81   39.15
   6   5   1   26.86   16.93
   6   5   1   15.28   12.05
   7   5   1  157.81   26.37
   8   5   1   -6.24   21.26
   9   5   1  -37.67   27.28
  10   5   1  -55.36   33.80
  11  -6  -1   -8.35   28.02
  10  -6  -1  -18.91   17.39
   9  -6  -1   44.38   26.96
   8  -6  -1   10.13   18.66
   7  -6  -1   53.78   22.24
   6  -6  -1  253.39   32.40
   5  -6  -1   38.85   16.03
   5  -6  -1   26.47   13.19
   4  -6  -1  638.86   54.76
   3  -6  -1   56.56    9.82
  -3   6   1   47.31   12.24
   3  -6  -1   60.47   13.67
  -2   6   1 1041.82   80.14
   2  -6  -1 1086.19   94.29
   2  -6  -1 1172.21   83.19
   1  -6  -1 1250.74  109.25
   1  -6  -1 1316.24   93.51
   0  -6  -1  359.00   26.99
   0  -6  -1  329.38   31.77
   0   6   1  304.67   28.97
   1   6   1  176.26   18.46
  -1  -6  -1  120.67   12.65
   2   6   1  230.78   22.62
  -2  -6  -1  205.93   24.43
   3   6   1  613.11   48.77
  -3  -6  -1  603.95   57.85
  -4  -6  -1  344.79   40.16
   4   6   1  383.98   35.56
   5   6   1  587.31   46.47
  -5  -6  -1  509.22   60.49
   5   6   1  647.93   51.55
   6   6   1   29.77   18.30
   7   6   1  162.97   27.45
   8   6   1   -5.26   22.32
   9   6   1   93.03   37.80
  10  -7  -1    4.08   23.79
   9  -7  -1   10.14   20.50
   8  -7  -1   53.78   24.34
   7  -7  -1   99.21   27.58
   6  -7  -1   -2.67   11.54
  -5   7   1  135.48   16.35
   5  -7  -1  135.32   21.87
   5  -7  -1  125.94   17.95
   4  -7  -1  276.86   27.70
  -4   7   1  246.29   23.56
   4  -7  -1  254.08   28.82
   3  -7  -1   27.87   12.78
  -3   7   1  -32.70   15.41
  -2   7   1  193.37   27.95
   2  -7  -1  254.47   25.03
   2  -7  -1  258.80   24.16
   1  -7  -1  188.27   18.90
  -1   7   1  169.68   29.04
   1  -7  -1  169.13   21.23
   0   7   1 1245.21   92.76
   0  -7  -1 1327.26  113.09
   0  -7  -1 1378.49   94.97
  -1  -7  -1  409.61   41.13
   1   7   1  442.62   36.88
  -1  -7  -1  441.53   33.06
   3   7   1  197.18   22.65
  -3  -7  -1  144.67   23.82
   4   7   1 1443.24  101.93
  -4  -7  -1 1351.46  123.82
  -5  -7  -1   38.28   17.06
   5   7   1   65.69   20.47
  -6  -7  -1  127.31   30.52
   6   7   1  144.61   31.82
   7   7   1    9.41   22.74
   8   7   1  169.61   43.28
   9   7   1  -46.22   21.40
  10   7   1  -19.74   34.74
   9  -8  -1   -9.36   18.28
   8  -8  -1   68.35   27.06
   7  -8  -1   -3.12   14.41
   6  -8  -1  299.54   36.48
   5  -8  -1   16.87   13.45
   5  -8  -1    5.92    8.37
   4  -8  -1  309.27   33.20
  -4   8   1  325.36   29.55
   4  -8  -1  320.12   32.96
   3  -8  -1   54.60   11.51
   3  -8  -1   49.27   15.17
  -3   8   1   48.90   22.26
  -2   8   1 1698.89  131.98
   2  -8  -1 1932.24  159.58
   2  -8  -1 2000.85  137.42
   1  -8  -1  480.27   39.87
   0  -8  -1  919.08   65.96
   0   8   1  869.82   65.76
   0  -8  -1  869.29   78.49
  -1  -8  -1   21.52    9.91
   1   8   1   55.46   16.69
  -1  -8  -1   38.46    8.17
   2   8   1 1067.21   77.07
  -2  -8  -1 1019.07   92.67
  -3  -8  -1  106.85   19.46
   3   8   1  135.81   21.30
   4   8   1  100.09   23.59
  -4  -8  -1   50.97   17.05
  -5  -8  -1   14.01   14.12
   5   8   1    4.17   16.16
   6   8   1   52.75   22.67
  -6  -8  -1   25.13   19.79
   7   8   1  -19.70   16.78
   8   8   1  -32.78   22.89
   9   8   1  -52.30   26.04
  10   8   1  -70.70   35.63
  10  -9  -1    7.89   27.25
   9  -9  -1    3.04   22.11
   8  -9  -1    1.88   18.16
   7  -9  -1  274.96   37.93
   6  -9  -1   30.18   17.28
   5  -9  -1  187.49   24.54
   5  -9  -1  176.74   25.87
   4  -9  -1   42.52   16.14
   4  -9  -1   47.65   12.65
   3  -9  -1  620.51   55.69
   3  -9  -1  714.25   62.28
   2  -9  -1    1.51    6.25
  -2   9   1   -4.40   15.05
   2  -9  -1    4.61    7.68
  -1   9   1 1599.44  112.40
   1  -9  -1 1585.98  138.22
   1  -9  -1 1641.00  117.44
   0   9   1   60.58   19.27
   0  -9  -1   39.67   10.62
   0  -9  -1   43.45   12.47
  -1  -9  -1  270.56   30.96
  -1  -9  -1  280.15   24.01
   1   9   1  296.10   29.17
  -2  -9  -1  800.48   57.29
  -2  -9  -1  761.95   72.55
   2   9   1  804.04   61.74
   3   9   1  701.81   57.80
  -3  -9  -1  725.40   68.18
   4   9   1  117.40   21.06
  -4  -9  -1   97.77   22.05
  -5  -9  -1  -14.19   12.15
   5   9   1  -10.00   13.87
   6   9   1  255.81   35.31
  -6  -9  -1  253.79   38.01
   7   9   1  104.17   34.74
   8   9   1    0.36   31.09
   9   9   1  -62.53   32.67
  10   9   1  -39.95   31.77
  10 -10  -1   -8.94   25.43
   9 -10  -1  -10.84   20.84
   8 -10  -1    6.19   18.72
   7 -10  -1    5.32   17.54
   6 -10  -1   12.92   14.74
   5 -10  -1  100.88   18.71
   5 -10  -1  122.92   25.01
   4 -10  -1  197.39   25.32
   4 -10  -1  179.61   24.96
   3 -10  -1   80.38   15.59
   3 -10  -1   85.73   16.62
   2 -10  -1    1.89    7.01
  -1  10   1  141.30   24.01
   1 -10  -1   98.95   17.43
   1 -10  -1  115.68   16.19
   0 -10  -1  452.55   45.32
   0 -10  -1  476.70   37.76
   0  10   1  434.59   39.41
  -1 -10  -1  716.79   52.96
   1  10   1  721.94   55.81
  -1 -10  -1  670.86   65.72
  -2 -10  -1   -2.99    9.27
   2  10   1    2.13   12.66
  -3 -10  -1  575.76   59.19
   3  10   1  613.18   51.56
  -4 -10  -1   52.19   19.96
   4  10   1  106.72   27.29
  -5 -10  -1  229.26   34.39
   5  10   1  244.20   33.27
   6  10   1   14.98   25.68
  -6 -10  -1   25.13   19.64
   7  10   1  186.86   33.63
   9  10   1  -47.12   36.72
   9 -11  -1    3.28   23.43
   8 -11  -1  -13.09   17.04
   7 -11  -1   55.95   25.41
   6 -11  -1   23.93   17.79
   5 -11  -1  526.78   52.09
   5 -11  -1  472.18   49.68
   4 -11  -1   10.82   10.16
   4 -11  -1   20.77   13.22
   3 -11  -1  261.23   31.21
   3 -11  -1  244.57   28.18
   2 -11  -1   13.61   10.94
   2 -11  -1   25.05   11.51
   1 -11  -1  367.19   32.70
   1 -11  -1  343.85   37.73
   0 -11  -1   24.34   10.75
   0 -11  -1   34.28    9.37
   0  11   1   35.42   15.84
  -1 -11  -1  469.42   48.68
   1  11   1  507.20   43.04
   2  11   1  141.18   22.40
  -2 -11  -1   90.69   19.45
   3  11   1   20.93   17.62
  -3 -11  -1   11.65   12.17
  -4 -11  -1  232.09   33.26
   4  11   1  274.72   33.21
   5  11   1  141.01   33.09
  -5 -11  -1   88.12   26.12
   6  11   1   94.60   32.52
  -6 -11  -1   68.36   25.65
   7  11   1  -19.62   30.25
   8  11   1  -23.50   31.65
   9 -12  -1   -9.24   23.70
   8 -12  -1   27.41   22.81
   7 -12  -1  -11.62   16.27
   6 -12  -1  227.11   33.07
   5 -12  -1   -0.10   11.12
   5 -12  -1   13.69   14.66
   4 -12  -1  770.59   69.93
   4 -12  -1  877.79   79.41
   3 -12  -1   68.75   17.41
   3 -12  -1   40.73   14.77
   2 -12  -1  252.99   26.69
   2 -12  -1  242.99   31.04
   1 -12  -1    8.23    9.05
   1 -12  -1   -9.02    9.20
   0  12   1  995.40   71.54
   0 -12  -1  919.57   71.31
   0 -12  -1  916.34   86.58
  -1 -12  -1  153.26   23.08
   1  12   1  145.97   23.41
  -2 -12  -1  247.86   31.25
   2  12   1  258.17   29.66
   3  12   1   50.56   22.09
  -3 -12  -1   52.85   17.09
  -4 -12  -1  134.99   27.51
   4  12   1  159.36   27.62
  -5 -12  -1    9.95   17.63
   5  12   1   21.30   22.27
  -6 -12  -1   74.32   25.70
   6  12   1   70.49   34.97
   7  12   1  103.63   38.80
   8  12   1  -78.53   36.89
   9  12   1  -57.90   37.14
   9 -13  -1   -4.79   22.00
   8 -13  -1  -10.78   22.84
   7 -13  -1  -14.52   14.99
   6 -13  -1   33.03   19.96
   5 -13  -1  107.31   25.24
   5 -13  -1   82.43   22.03
   4 -13  -1   80.99   20.90
   4 -13  -1   95.33   22.66
   3 -13  -1   -3.28   11.03
   3 -13  -1    3.42   11.63
   2 -13  -1   -5.44   10.02
   2 -13  -1    3.92    9.21
   1 -13  -1    0.22   10.20
   1 -13  -1   12.88    9.53
   0 -13  -1   74.68   18.05
  -1 -13  -1   -0.46    9.32
   1  13   1   -3.29   12.79
  -2 -13  -1  333.31   39.21
   2  13   1  328.20   34.89
  -3 -13  -1   -1.92   10.73
   3  13   1   -3.04   14.23
   4  13   1  135.29   34.00
  -4 -13  -1  113.10   26.85
  -5 -13  -1   15.68   17.89
   5  13   1   49.63   26.11
  -6 -13  -1  374.27   51.07
   6  13   1  411.09   49.10
   7  13   1  -32.75   34.19
   8  13   1   10.87   40.48
   8 -14  -1   13.13   23.67
   7 -14  -1   -8.78   18.47
   6 -14  -1   88.76   27.18
   5 -14  -1   12.06   15.18
   5 -14  -1   22.86   17.74
   4 -14  -1  182.69   27.47
   4 -14  -1  220.81   31.94
   3 -14  -1  154.94   23.30
   3 -14  -1  152.21   26.70
   2 -14  -1  461.86   43.20
   2 -14  -1  473.35   51.66
   1 -14  -1   18.27   14.09
   0 -14  -1  524.73   55.45
  -1 -14  -1   40.71   16.54
  -2 -14  -1  446.62   50.05
   2  14   1  478.94   45.05
   3  14   1   42.33   23.33
  -3 -14  -1   22.66   16.30
  -4 -14  -1  143.27   29.93
   4  14   1  237.13   42.65
  -5 -14  -1  103.53   28.21
   5  14   1  127.85   34.89
  -6 -14  -1   22.79   21.58
   6  14   1   16.35   30.59
   7  14   1   65.86   46.57
   8 -15  -1  -27.73   19.80
   7 -15  -1    8.63   18.72
   6 -15  -1    6.03   19.61
   5 -15  -1  172.88   28.52
   5 -15  -1  214.52   32.89
   4 -15  -1   21.10   15.03
   4 -15  -1    5.05   14.32
   3 -15  -1  205.48   27.19
   3 -15  -1  237.68   33.01
   2 -15  -1   -0.39   12.73
   1 -15  -1  409.12   47.45
   0 -15  -1   -3.87   12.37
  -1 -15  -1  177.96   27.71
  -2 -15  -1   15.25   14.83
   3  15   1  132.93   32.72
  -3 -15  -1   94.75   22.32
   4  15   1   47.68   29.02
  -4 -15  -1   55.04   21.31
   5  15   1   30.35   33.17
  -5 -15  -1   38.27   22.27
  -6 -15  -1    0.28   19.17
   6  15   1   -0.92   33.99
   7  15   1  -65.59   35.12
   7 -16  -1  -21.07   19.43
   6 -16  -1   11.80   17.92
   5 -16  -1   -1.05   13.98
   5 -16  -1    2.47   16.38
   4 -16  -1  163.73   26.80
   4 -16  -1  173.01   31.15
   3 -16  -1    3.28   14.84
   2 -16  -1   16.59   17.25
   1 -16  -1   79.56   22.38
   0 -16  -1  150.82   26.56
  -1 -16  -1   71.71   20.87
  -2 -16  -1   25.74   16.53
  -3 -16  -1  152.44   28.01
  -4 -16  -1   16.63   16.95
   4  16   1    5.30   27.62
  -5 -16  -1  129.49   29.33
   5  16   1  151.08   45.69
   6  16   1  -47.60   33.37
  -6 -16  -1   13.63   19.81
   7  16   1  -39.32   42.53
   7 -17  -1    8.82   21.85
   6 -17  -1  -13.08   15.57
   5 -17  -1   10.49   17.25
   4 -17  -1   -3.57   14.27
   3 -17  -1  164.10   31.28
   2 -17  -1   11.95   15.47
   1 -17  -1  113.10   27.34
   0 -17  -1   39.99   20.22
  -1 -17  -1   -8.59   12.91
  -3 -17  -1  146.87   28.52
  -4 -17  -1  117.10   26.89
  -5 -17  -1    6.84   16.19
   6  17   1   44.72   44.67
  -6 -17  -1   48.25   24.33
   7  17   1  -85.66   39.85
   6 -18  -1   22.32   21.56
   4 -18  -1   85.39   28.08
   3 -18  -1   -4.58   15.65
   2 -18  -1  384.82   50.07
   1 -18  -1    4.27   15.71
   0 -18  -1   33.70   19.20
  -1 -18  -1   -9.79   13.40
  -2 -18  -1  118.20   25.31
  -3 -18  -1   30.60   19.15
  -4 -18  -1   28.41   18.39
  -5 -18  -1    5.84   19.41
   4 -19  -1   -0.81   21.47
   3 -19  -1   84.09   28.17
   2 -19  -1    8.46   17.62
   1 -19  -1   92.71   28.71
   0 -19  -1   28.94   19.55
  -1 -19  -1   16.49   18.89
  -2 -19  -1   14.35   17.37
  -3 -19  -1   49.89   20.61
  -4 -19  -1   73.25   25.06
  -5 -19  -1   -5.44   16.64
   4 -20  -1    8.76   19.82
   3 -20  -1  -11.79   16.94
   2 -20  -1    6.76   20.94
   0 -20  -1    8.93   19.86
  -1 -20  -1   14.66   19.93
  -2 -20  -1    9.77   16.38
  -3 -20  -1   68.03   24.86
  -4 -20  -1   12.73   19.29
   3 -21  -1  117.65   35.01
   2 -21  -1    7.49   22.28
   1 -21  -1   56.57   28.50
   0 -21  -1   17.00   19.49
  -1 -21  -1   94.91   28.67
  -2 -21  -1   11.11   19.30
  -3 -21  -1   47.99   24.18
  -3 -21   2   15.53   19.17
  -2 -21   2   53.29   26.04
  -1 -21   2    4.69   18.77
   0 -21   2   49.39   25.31
   1 -21   2   -6.06   18.35
   2 -21   2   70.11   28.11
   3 -21   2   18.96   24.60
  -4 -20   2   23.76   18.58
  -3 -20   2    8.80   15.92
  -2 -20   2  104.20   27.82
  -1 -20   2   20.13   18.53
   0 -20   2   21.76   19.89
   1 -20   2   20.32   22.10
   2 -20   2   11.85   20.44
   3 -20   2   18.77   22.18
   4 -20   2    2.26   18.16
  -5 -19   2   37.84   19.64
  -4 -19   2    2.35   16.31
  -3 -19   2   82.73   23.91
  -2 -19   2    2.69   17.49
  -1 -19   2   99.56   28.29
   0 -19   2   74.66   25.38
   1 -19   2   -1.74   19.19
   2 -19   2   -1.27   17.99
   3 -19   2   39.45   24.45
   4 -19   2  115.67   31.25
   5 -19   2   -7.65   19.41
  -5 -18   2   33.91   20.02
  -4 -18   2    2.28   15.92
  -3 -18   2   -3.62   15.13
  -2 -18   2    7.53   15.44
  -1 -18   2  252.36   36.87
   0 -18   2    5.82   18.51
   1 -18   2   58.38   25.08
   2 -18   2   -7.70   16.40
   3 -18   2  100.94   28.35
   4 -18   2  -10.45   14.42
   5 -18   2   97.69   29.68
   5 -18   2  144.13   32.15
   6 -18   2   -9.12   18.94
   7  17  -2  -18.31   36.70
  -5 -17   2   50.40   21.29
  -4 -17   2   15.94   16.58
  -3 -17   2  121.07   23.78
  -2 -17   2   33.46   18.02
  -1 -17   2   48.94   19.25
   0 -17   2  103.72   28.00
   2 -17   2    3.89   15.44
   3 -17   2   10.66   16.14
   4 -17   2  107.54   29.50
   4 -17   2   82.83   26.72
   5 -17   2   -6.73   17.14
   5 -17   2    2.42   18.05
   6 -17   2    6.16   21.85
   7 -17   2  -11.98   20.00
   7  16  -2  -60.53   31.28
   6  16  -2  141.38   43.17
   5  16  -2  -16.42   24.91
  -5 -16   2   13.22   16.71
  -4 -16   2  100.96   23.13
  -3 -16   2   59.10   18.91
  -2 -16   2  269.31   35.47
  -1 -16   2   -2.20   14.15
   0 -16   2   26.42   16.55
   1 -16   2  111.97   27.12
   2 -16   2   -4.37   13.92
   3 -16   2   53.22   20.01
   3 -16   2   51.04   20.22
   4 -16   2   -8.85   13.09
   4 -16   2    0.75   15.84
   5 -16   2   16.46   17.46
   5 -16   2   18.93   21.45
   6 -16   2   -4.08   18.42
   7 -16   2   -7.74   19.91
   8  15  -2  -44.25   31.07
   7  15  -2  -16.27   34.24
   6  15  -2  -23.60   26.09
  -5 -15   2    6.57   13.62
   5  15  -2  -14.87   21.21
  -4 -15   2   77.25   22.47
   4  15  -2  121.22   29.96
  -3 -15   2   11.68   14.31
  -2 -15   2  243.83   33.21
  -1 -15   2   79.43   20.51
   0 -15   2  449.57   49.97
   1 -15   2   37.60   19.22
   2 -15   2  379.03   44.25
   2 -15   2  326.50   39.06
   3 -15   2   33.85   18.86
   3 -15   2   51.23   19.76
   4 -15   2  155.29   28.24
   4 -15   2  136.05   30.72
   5 -15   2    2.20   15.66
   5 -15   2   10.52   16.34
   6 -15   2   75.44   28.29
   7 -15   2  -23.25   20.81
   8 -15   2  -18.54   22.69
   8  14  -2   59.00   43.59
   7  14  -2  -46.35   23.31
   6  14  -2   91.67   35.38
  -5 -14   2   20.31   16.63
   5  14  -2   18.23   23.45
  -4 -14   2  456.91   52.92
   4  14  -2  532.92   46.95
   3  14  -2  138.03   25.99
  -3 -14   2  100.25   21.90
  -2 -14   2   12.21   12.88
  -1 -14   2   84.28   18.82
   0 -14   2  157.47   25.52
   1 -14   2  254.72   31.69
   1 -14   2  266.81   35.43
   2 -14   2   12.91   15.75
   2 -14   2   -7.49   13.60
   3 -14   2  233.39   33.81
   3 -14   2  227.89   32.27
   4 -14   2    9.91   14.22
   4 -14   2   23.32   18.89
   5 -14   2   62.86   24.78
   5 -14   2  105.72   23.93
   6 -14   2  -12.24   16.10
   7 -14   2    9.42   22.72
   8 -14   2  -28.90   22.44
   9  13  -2   -3.22   43.91
   8  13  -2  -25.91   30.73
   7  13  -2   35.56   34.49
   6  13  -2   -2.52   22.03
   5  13  -2  405.67   41.35
  -5 -13   2  370.67   45.80
   4  13  -2   19.64   18.36
  -4 -13   2   -3.75   10.35
   3  13  -2  190.21   24.29
  -3 -13   2  166.35   26.11
   2  13  -2   -8.97   10.66
  -2 -13   2   -2.42   11.47
  -1 -13   2   38.37   14.57
   0 -13   2   -1.59    9.03
   0 -13   2   -1.49    8.69
   1 -13   2   66.58   17.99
   1 -13   2   46.31   15.54
   2 -13   2    2.98   13.32
   2 -13   2   -8.01    9.71
   3 -13   2   16.59   15.19
   3 -13   2   -6.10   11.82
   4 -13   2    2.63   13.90
   4 -13   2   25.28   17.76
   5 -13   2    6.36   16.02
   5 -13   2  -15.45   12.66
   6 -13   2   10.29   18.32
   7 -13   2   -1.05   19.90
   8 -13   2  -21.39   21.40
   9 -13   2  -34.92   24.08
   9  12  -2  -56.78   34.97
   8  12  -2   20.19   37.67
   7  12  -2    3.71   26.57
   6  12  -2  138.38   35.25
   5  12  -2   29.03   19.42
  -5 -12   2    0.75   13.88
   4  12  -2  287.60   30.97
  -4 -12   2  293.65   36.56
   3  12  -2  517.38   42.38
  -3 -12   2  471.02   50.69
  -2 -12   2   11.54   10.35
   2  12  -2   16.22   11.19
  -1 -12   2   24.74   12.65
   1  12  -2   39.64   11.88
   0 -12   2   98.17   20.69
   0 -12   2   87.18   17.73
   1 -12   2  376.82   39.86
   1 -12   2  396.04   42.08
   2 -12   2    6.64   11.33
   2 -12   2    6.92    9.69
   3 -12   2  498.43   50.00
   4 -12   2   -4.09   13.56
   5 -12   2  189.76   31.82
   6 -12   2    5.33   16.26
   8 -12   2  -10.45   20.68
   9 -12   2  -44.69   24.36
  10  11  -2  -35.57   35.22
   9  11  -2  -10.92   31.96
   8  11  -2  -30.92   28.83
   7  11  -2  129.09   37.27
   6  11  -2   -8.38   18.79
  -5 -11   2   99.15   23.19
   5  11  -2  136.42   23.54
  -4 -11   2  258.33   31.82
   4  11  -2  260.94   28.89
   3  11  -2  169.61   21.16
  -3 -11   2  174.62   24.41
  -2 -11   2  385.50   40.48
   2  11  -2  390.49   32.75
   1  11  -2  186.60   18.68
  -1 -11   2  191.75   24.41
  -1 -11   2  189.37   24.11
   0 -11   2  112.17   17.69
   0  11  -2   95.18   12.22
   0 -11   2  113.60   18.78
   1 -11   2   21.39   14.13
   1 -11   2   11.16   11.28
   2 -11   2  965.85   80.81
   3 -11   2   84.67   21.02
   4 -11   2  123.62   27.74
   5 -11   2    4.21   14.37
   6 -11   2  274.07   39.04
   7 -11   2   -5.33   17.34
   8 -11   2   -5.28   18.77
   9 -11   2  -33.25   21.71
  10  10  -2   13.74   35.79
   9  10  -2  -48.08   25.10
   8  10  -2  182.66   45.07
   7  10  -2  -24.54   19.91
   6  10  -2  223.64   29.55
   5  10  -2   -2.22   15.44
  -5 -10   2   -6.54   11.59
   4  10  -2  546.19   46.68
  -4 -10   2  595.19   57.11
   3  10  -2  135.23   22.29
  -3 -10   2   76.04   17.95
   2  10  -2  267.16   23.33
  -2 -10   2  228.91   29.09
  -2 -10   2  240.50   28.19
  -1 -10   2  155.34   20.44
  -1 -10   2  151.20   21.76
   1  10  -2  144.74   16.01
   0 -10   2  159.94   21.70
   0  10  -2  163.07   15.06
   0 -10   2  137.36   21.94
   1 -10   2  107.18   18.65
   2 -10   2    4.64   10.93
   4 -10   2   10.39   12.82
   5 -10   2   -9.78   11.17
   6 -10   2   -6.04   14.70
   7 -10   2   40.61   23.70
   8 -10   2    8.51   22.47
   9 -10   2  -28.35   23.81
   9   9  -2   22.68   35.65
   8   9  -2   -4.76   28.80
   7   9  -2  132.05   31.91
   6   9  -2   72.48   22.88
   5   9  -2  295.79   32.41
  -5  -9   2  326.90   37.46
   4   9  -2   87.59   18.45
  -4  -9   2   53.16   16.23
   3   9  -2  244.09   24.29
  -3  -9   2  231.82   27.38
   2   9  -2  236.32   23.35
  -2  -9   2  240.34   28.29
  -2  -9   2  307.38   34.96
  -1  -9   2  301.17   31.16
  -1  -9   2  267.46   32.86
   1   9  -2  313.28   24.36
   0   9  -2 1256.90   82.57
   0  -9   2 1224.99   96.89
   1  -9   2  297.88   31.87
  -1   9  -2  292.23   20.83
   2  -9   2  105.45   22.17
   3  -9   2   -3.14    9.58
   4  -9   2  612.19   58.72
   5  -9   2   52.10   20.57
   6  -9   2   25.68   18.41
   7  -9   2    5.44   18.29
   8  -9   2    9.14   26.19
   9  -9   2  -20.04   19.11
  10  -9   2  -39.01   25.07
  10   8  -2  -52.94   29.95
   9   8  -2  -23.02   25.37
   8   8  -2    3.87   23.61
   7   8  -2   41.19   21.89
   6   8  -2  135.66   28.36
   5   8  -2  194.52   23.04
  -5  -8   2  164.48   25.41
   4   8  -2  134.00   18.10
  -4  -8   2  148.66   21.37
  -3  -8   2  208.47   23.99
   3   8  -2  185.75   20.04
  -2  -8   2    6.63    7.68
   1   8  -2  944.18   64.09
  -1  -8   2  923.18   77.66
  -1  -8   2  942.38   82.32
   0  -8   2  302.33   32.26
   0   8  -2  304.58   22.47
  -1   8  -2 1179.07   78.88
   1  -8   2 1240.89   95.18
   2  -8   2    7.14   10.21
   3  -8   2 1059.32   87.10
   4  -8   2   24.17   13.18
   5  -8   2  373.45   42.76
   7  -8   2   95.93   29.49
   8  -8   2  -10.44   16.77
   9  -8   2   -7.83   24.53
  10  -8   2  -37.46   23.10
  11   7  -2  -59.62   40.38
  10   7  -2  -66.41   31.25
   9   7  -2  104.51   38.24
   8   7  -2  -17.55   21.59
   7   7  -2  870.63   71.76
   6   7  -2   19.37   15.07
  -5  -7   2  574.30   56.03
   5   7  -2  551.17   46.20
   4   7  -2   65.13   15.81
  -4  -7   2   42.82   13.50
  -3  -7   2 1003.10   84.87
   3   7  -2  917.13   68.10
  -2  -7   2   70.23   11.97
   2   7  -2   94.92   11.81
  -1  -7   2 1567.36  139.50
   1   7  -2 1701.43  109.35
  -1  -7   2 1680.77  129.24
   0  -7   2  364.24   36.08
   0   7  -2  327.22   24.84
   1  -7   2   23.21   11.69
   2  -7   2  465.34   43.96
   3  -7   2  850.59   72.02
   4  -7   2  191.22   27.55
   5  -7   2    1.72   12.63
   6  -7   2   19.42   17.19
   7  -7   2    3.43   16.87
   8  -7   2    0.44   20.60
   9  -7   2  -13.65   19.80
  10  -7   2  -32.99   22.16
  10   6  -2  -13.10   28.61
   9   6  -2    5.56   25.14
   8   6  -2  156.37   27.28
   7   6  -2   42.87   21.52
   6   6  -2  268.27   30.04
   6   6  -2  319.01   31.43
   5   6  -2  106.30   19.92
  -5  -6   2   44.88   16.42
  -4  -6   2    7.68    7.90
   4   6  -2   24.94   12.16
  -3  -6   2  228.86   24.13
   3   6  -2  218.40   21.14
   2   6  -2  825.96   59.31
  -2  -6   2  881.42   74.45
  -1  -6   2  601.55   62.32
   1   6  -2  752.03   46.89
   0  -6   2   35.93   13.31
   0   6  -2   49.53    5.47
   1  -6   2   61.86   14.61
   2  -6   2  450.05   41.88
   3  -6   2  550.21   50.61
   4  -6   2    3.22    7.50
   4  -6   2   12.82   10.13
   5  -6   2  403.81   43.60
   6  -6   2   87.41   24.19
   7  -6   2   63.52   24.22
   8  -6   2    6.01   22.10
   9  -6   2  -25.16   18.63
  10  -6   2  -17.56   21.58
  10   5  -2  -40.54   26.27
   9   5  -2  -19.51   20.54
   8   5  -2   46.32   22.46
   7   5  -2   97.78   23.18
   7   5  -2  162.52   24.97
   6   5  -2  139.20   19.85
   6   5  -2  112.34   19.64
   5   5  -2   24.59   11.85
  -5  -5   2    9.41   11.22
   5   5  -2    8.45   11.61
  -4  -5   2  141.63   19.33
   4   5  -2  162.42   17.86
   3   5  -2   89.66   12.30
   2   5  -2  931.43   67.29
  -2  -5   2 1052.20   85.04
   1   5  -2   20.24    6.01
   0   5  -2 1453.49   89.89
   0  -5   2 1302.54  104.86
   1  -5   2  150.65   19.24
   2  -5   2  806.38   65.90
   3  -5   2  272.37   30.78
   3  -5   2  292.32   21.05
   4  -5   2 1811.95  138.78
   4  -5   2 1824.44  119.85
   5  -5   2   -1.52    7.14
   5  -5   2   25.06   14.84
   6  -5   2  398.49   44.66
   7  -5   2    0.68   15.83
   8  -5   2  230.25   38.23
   9  -5   2   -9.41   19.70
  10  -5   2  -13.98   22.76
  11  -5   2  -25.91   25.94
  10   4  -2    8.55   34.04
   9   4  -2  -23.30   24.77
   8   4  -2  238.38   32.18
   8   4  -2  219.28   32.93
   7   4  -2   37.77   17.67
   7   4  -2   25.26   18.00
   6   4  -2  451.44   44.58
   6   4  -2  519.79   42.49
   5   4  -2  629.54   48.73
   5   4  -2  640.52   53.17
  -5  -4   2  601.01   60.32
   4   4  -2  555.97   43.70
   4   4  -2  610.45   48.56
  -4  -4   2  555.04   52.26
  -3  -4   2   20.39    6.51
   3   4  -2   27.43    8.94
  -2  -4   2  312.76   27.41
   2   4  -2  277.00   22.67
   1   4  -2 1162.96   76.78
   1  -4   2  309.94   29.69
   2  -4   2  214.71   23.49
   3  -4   2  801.63   51.79
   3  -4   2  728.57   63.33
   4  -4   2   41.40   14.99
   4  -4   2   65.30    9.57
   5  -4   2  359.95   29.38
   5  -4   2  377.26   40.15
   6  -4   2   -1.02    9.37
   6  -4   2    1.43   10.59
   7  -4   2   27.61   20.36
   7  -4   2   66.51   15.70
   8  -4   2   55.05   25.94
   9  -4   2   26.10   23.79
  10  -4   2  -40.52   21.54
  11  -4   2  -41.57   23.94
  11   3  -2  -48.99   35.27
  10   3  -2  -11.31   28.90
   9   3  -2  140.97   35.68
   8   3  -2   62.63   25.33
   8   3  -2  104.44   27.19
   7   3  -2  789.99   69.71
   7   3  -2  765.45   62.85
   6   3  -2   30.49   14.01
   6   3  -2    6.07   14.31
  -5  -3   2 1534.50  128.60
   5   3  -2 1330.43  103.30
   5   3  -2 1207.58   94.23
   4   3  -2   10.66   11.66
   3   3  -2  957.95   69.39
   3   3  -2 1037.64   76.33
  -3  -3   2 1038.25   86.07
   2   3  -2   11.48    4.59
  -2  -3   2    4.61    2.63
   1   3  -2 1854.54  120.78
   0  -3   2   49.28   12.78
   1  -3   2   29.65    8.32
   2  -3   2  124.49   16.32
   3  -3   2   33.70    7.06
   3  -3   2   26.14   11.03
   4  -3   2    5.79    8.34
   4  -3   2   11.07   11.68
   6  -3   2  227.71   30.71
   6  -3   2  220.71   22.45
   7  -3   2   -7.32   14.19
   7  -3   2   -1.08   10.21
   8  -3   2  -10.72   18.78
   8  -3   2    9.25   15.71
   9  -3   2    4.35   21.18
  10  -3   2  -26.85   20.54
  11  -3   2  -10.18   30.50
  11   2  -2  -58.24   33.87
  10   2  -2  -55.80   26.34
   9   2  -2    2.09   20.76
   9   2  -2   -3.40   23.60
   8   2  -2   72.07   23.56
   8   2  -2   29.90   21.96
   7   2  -2  121.08   25.18
   7   2  -2   72.70   22.64
   6   2  -2  414.16   37.36
   6   2  -2  444.34   43.56
   5   2  -2  180.36   19.81
   4   2  -2   55.43   14.65
   4   2  -2   63.65   11.46
  -3  -2   2 1571.15  127.57
   3   2  -2 1500.40  101.95
   3   2  -2 1502.93  110.32
  -2  -2   2  331.47   28.86
   1   2  -2  803.18   53.26
   1  -2   2 1746.41  126.67
   2  -2   2    8.02    3.98
   2  -2   2    3.50    5.89
   3  -2   2  765.68   65.14
   3  -2   2  879.83   56.74
   4  -2   2   -0.13    8.75
   4  -2   2   -1.40    7.12
   5  -2   2  752.67   65.15
   5  -2   2  765.04   55.53
   6  -2   2   -3.09   11.69
   6  -2   2    4.91    9.34
   7  -2   2  369.39   44.13
   7  -2   2  417.49   36.65
   8  -2   2    2.74   18.98
   8  -2   2    5.06   16.87
   9  -2   2   31.52   26.07
   9  -2   2   80.61   27.96
  10  -2   2   -5.60   23.43
  11  -2   2   56.40   36.09
  10   1  -2  -28.17   24.08
  10   1  -2   33.55   28.51
   9   1  -2  112.77   32.81
   9   1  -2   99.87   32.33
   8   1  -2   14.41   17.05
   8   1  -2    7.21   16.96
   7   1  -2  -11.12   13.86
   7   1  -2   -2.50   14.02
   6   1  -2   91.35   18.85
   6   1  -2   52.18   20.27
   5   1  -2  248.01   28.66
   5   1  -2  247.24   23.70
   4   1  -2  845.11   65.47
   4   1  -2  792.65   58.26
   3   1  -2  205.94   21.26
   3   1  -2  203.68   18.23
   2   1  -2 1702.34  115.48
   2   1  -2 1819.99  124.93
   1   1  -2    9.09    5.12
   1   1  -2    2.05    2.13
   1  -1   2 1221.68   89.60
   2  -1   2  939.84   74.61
   2  -1   2 1048.54   67.53
   3  -1   2 1226.24   81.27
   3  -1   2 1164.65   90.03
   4  -1   2  436.19   33.63
   4  -1   2  413.08   38.94
   5  -1   2   38.15   12.05
   5  -1   2   26.91   13.01
   6  -1   2  300.37   29.45
   6  -1   2  305.52   34.92
   7  -1   2  113.84   27.27
   7  -1   2  107.33   24.29
   8  -1   2  178.93   26.94
   8  -1   2  170.47   31.41
   9  -1   2   18.61   22.53
   9  -1   2    6.31   24.30
  10  -1   2   88.03   34.08
  10   0  -2  131.71   38.26
  10   0  -2  199.48   43.52
   9   0  -2    3.98   19.32
   9   0  -2   -9.06   19.66
   8   0  -2  494.02   46.30
   8   0  -2  517.58   55.87
   7   0  -2  -17.16   13.30
   7   0  -2   -6.03   13.95
   6   0  -2  708.07   54.07
   6   0  -2  681.51   61.59
   5   0  -2   -7.64    9.48
   5   0  -2   31.60   12.48
   4   0  -2 4926.57  324.65
   4   0  -2 5054.94  350.34
   3   0  -2   -9.07    5.60
   3   0  -2   -9.71    5.62
   2   0  -2 1588.72  104.57
   2   0  -2 1594.03  113.12
   1   0  -2    1.10    1.36
   1   0  -2    2.19    2.05
   1   0   2  101.68   11.34
   1   0   2   82.70   10.90
   2   0   2 2223.09  141.28
   2   0   2 2033.04  151.22
   3   0   2   -2.49    7.60
   3   0   2   -0.52    6.85
   4   0   2  115.65   16.60
   4   0   2  118.69   14.60
   5   0   2   -2.09    7.59
   5   0   2   -3.46    9.02
   6   0   2  223.14   24.72
   6   0   2  231.31   29.11
   7   0   2  -15.21   11.69
   7   0   2    7.21   15.19
   8   0   2   37.95   21.73
   8   0   2   62.88   24.53
   9   0   2   -9.02   19.24
   9   0   2  -21.98   21.40
  10   0   2  -41.43   28.30
  11  -1  -2  -30.11   26.74
  10  -1  -2    4.81   24.99
  10  -1  -2  -25.50   23.32
   9  -1  -2  128.94   31.04
   9  -1  -2  123.45   35.62
   8  -1  -2   26.26   18.89
   8  -1  -2    7.00   18.86
   7  -1  -2   -3.69   14.74
   7  -1  -2   -5.47   12.87
   6  -1  -2   33.42   16.74
   6  -1  -2   48.03   15.82
   5  -1  -2  262.59   29.00
   5  -1  -2  250.98   24.44
   4  -1  -2  825.15   63.11
   4  -1  -2  979.66   71.57
   3  -1  -2  223.76   22.02
   3  -1  -2  216.79   19.17
   2  -1  -2 1638.08  108.46
   2  -1  -2 1669.72  117.69
   1  -1  -2    7.20    3.10
  -1   1   2    3.19    2.57
   0   1   2  999.25   69.29
   1   1   2 1537.97  104.48
   2   1   2 1143.60   85.59
   2   1   2 1230.23   82.35
   3   1   2 1342.99   89.06
   3   1   2 1220.07   93.76
   4   1   2  435.90   36.62
   4   1   2  376.60   33.47
   5   1   2   38.79   14.09
   5   1   2   20.53   12.45
   6   1   2  322.39   33.12
   6   1   2  337.68   36.72
   7   1   2  115.80   26.24
   7   1   2  115.87   25.31
   8   1   2  165.99   28.84
   8   1   2  195.60   32.03
   9   1   2   32.46   23.43
   9   1   2    9.15   28.21
  10   1   2   13.59   35.49
  11   1   2  -86.35   39.99
  11  -2  -2   -4.67   27.72
  10  -2  -2  -37.17   20.51
  10  -2  -2  -11.05   21.79
   9  -2  -2   -9.56   18.19
   9  -2  -2   10.90   21.58
   8  -2  -2   25.02   21.48
   8  -2  -2   71.52   21.71
   7  -2  -2   50.31   20.41
   7  -2  -2   51.04   15.80
   6  -2  -2  347.07   37.89
   6  -2  -2  358.11   31.94
   5  -2  -2  108.92   18.99
   5  -2  -2  112.39   15.94
   4  -2  -2   61.91   16.82
   4  -2  -2  130.01   15.10
   3  -2  -2 1523.56  102.06
   3  -2  -2 1543.19  111.88
   2  -2  -2  284.99   25.23
   2  -2  -2  285.85   20.82
   2  -2  -2  273.22   23.93
   1  -2  -2  907.35   63.41
   1  -2  -2  940.06   75.20
  -1   2   2  800.44   59.39
   2   2   2    0.44    3.60
   2   2   2    4.96    7.85
   3   2   2  973.35   70.63
   3   2   2  928.98   68.34
   4   2   2   10.08   10.04
   4   2   2    5.03    8.62
   5   2   2  940.04   69.06
   5   2   2  738.14   62.92
   6   2   2    3.91   13.62
   6   2   2   14.21   14.71
   7   2   2  375.83   39.76
   7   2   2  436.08   44.74
   8   2   2  -10.56   20.65
   8   2   2    7.52   18.57
   9   2   2   63.92   34.48
  10   2   2  -39.85   31.67
  11   2   2  -84.14   39.31
  11  -3  -2   74.70   39.74
  10  -3  -2   -4.12   22.40
   9  -3  -2  157.17   35.96
   9  -3  -2  128.84   28.33
   8  -3  -2   75.34   26.30
   8  -3  -2   85.51   20.47
   7  -3  -2  670.33   61.38
   7  -3  -2  595.77   49.52
   6  -3  -2   -1.30   11.28
   6  -3  -2    8.71   11.66
   5  -3  -2 1203.91   82.38
   5  -3  -2 1162.88   92.48
   5  -3  -2 1173.04   99.03
   4  -3  -2   75.91   13.01
   3  -3  -2 1010.30   71.66
   3  -3  -2  883.17   78.65
   3  -3  -2  907.69   63.74
  -2   3   2   -5.77    4.21
  -1   3   2 2174.68  149.33
   1  -3  -2 2336.55  187.64
   0   3   2   44.69   14.22
  -1  -3  -2   43.98    8.96
   1   3   2   47.61   12.08
   2   3   2  139.19   17.22
  -2  -3  -2  163.93   21.22
  -3  -3  -2   17.94   14.24
   3   3   2   33.75    8.38
   3   3   2   44.48   13.34
   4   3   2    3.38    8.87
   4   3   2   19.30   13.58
   5   3   2   -3.48    9.55
   5   3   2   22.85   14.42
   6   3   2  235.58   28.81
   6   3   2  279.69   30.98
   7   3   2   -2.62   15.27
   7   3   2   15.51   20.15
   8   3   2    7.16   20.45
   9   3   2   11.45   33.71
  11   3   2  -81.11   41.22
  11  -4  -2  -43.33   22.13
  10  -4  -2  113.85   36.88
   9  -4  -2  -16.34   16.88
   8  -4  -2  157.75   21.24
   8  -4  -2  158.95   30.62
   7  -4  -2   -1.92   11.94
   7  -4  -2    4.06   12.81
   6  -4  -2  420.15   35.99
   6  -4  -2  454.28   44.58
   5  -4  -2  636.26   55.07
   5  -4  -2  633.82   55.26
   5  -4  -2  616.96   47.08
   4  -4  -2  639.31   46.13
   4  -4  -2  636.11   54.66
   4  -4  -2  605.30   52.35
   3  -4  -2   18.62    5.65
   3  -4  -2   18.64    5.69
   3  -4  -2   18.98    9.08
  -2   4   2  275.17   22.34
   2  -4  -2  284.82   25.81
   2  -4  -2  257.88   23.84
  -1   4   2 1387.44   97.54
   1  -4  -2 1415.57   99.20
   1  -4  -2 1380.72  117.47
   0  -4  -2 2130.58  178.10
   0  -4  -2 2122.44  147.91
   1   4   2  358.30   33.46
  -1  -4  -2  425.70   37.62
   2   4   2  293.13   27.56
  -2  -4  -2  285.59   30.54
  -3  -4  -2  763.95   75.73
   3   4   2  848.16   61.71
  -4  -4  -2   30.64   18.22
   4   4   2   26.38   11.17
   4   4   2   26.24   11.18
   4   4   2   44.85   17.95
   5   4   2  460.81   39.58
   5   4   2  462.42   39.58
   5   4   2  398.12   40.22
   6   4   2    0.85   14.45
   6   4   2   -7.28   11.01
   7   4   2   45.08   24.67
   8   4   2   34.04   28.19
   9   4   2   74.21   35.20
  10   4   2  -52.60   28.76
  11  -5  -2  -35.99   26.24
  10  -5  -2  -14.84   20.64
   9  -5  -2  -12.91   17.85
   8  -5  -2   -7.93   15.64
   7  -5  -2   87.99   18.78
   7  -5  -2  101.39   26.41
   6  -5  -2   83.02   15.17
   6  -5  -2  120.20   24.60
   5  -5  -2    4.04    6.57
   5  -5  -2    7.36   12.49
   5  -5  -2   -6.51   10.19
   4  -5  -2  116.64   17.75
   4  -5  -2  122.98   14.61
  -3   5   2   48.72   13.00
   3  -5  -2   55.40   10.04
   3  -5  -2   49.72   12.52
   2  -5  -2  978.13   85.00
   2  -5  -2 1006.98   73.94
  -1   5   2   13.26   16.27
   1  -5  -2    1.21    4.03
   0  -5  -2 1646.40  117.44
   0  -5  -2 1710.49  141.94
  -1  -5  -2  199.19   22.45
   1   5   2  200.58   23.49
   2   5   2  993.91   75.11
  -2  -5  -2 1045.97   90.59
   3   5   2  353.65   25.88
  -3  -5  -2  257.87   33.76
   3   5   2  318.56   30.83
   4   5   2 1874.56  131.68
  -5  -5  -2  -10.27   17.82
   5   5   2    2.25    8.96
   5   5   2    6.33   12.62
   6   5   2  460.36   44.42
   7   5   2    5.68   23.19
   8   5   2  289.07   39.29
   9   5   2    8.31   29.48
  10   5   2  -18.74   34.20
  11   5   2  -64.45   38.87
  11  -6  -2  -23.45   26.28
  10  -6  -2   24.24   27.54
   9  -6  -2   -2.68   19.40
   8  -6  -2   80.80   27.20
   7  -6  -2    5.49   15.25
   6  -6  -2  299.67   33.98
   6  -6  -2  250.44   25.25
   5  -6  -2   81.45   19.51
   5  -6  -2   68.44   13.25
   4  -6  -2   13.11    7.27
  -4   6   2   22.08   10.27
   4  -6  -2   18.85   12.03
   3  -6  -2  201.64   21.46
   3  -6  -2  194.94   20.72
  -3   6   2  186.90   19.50
   2  -6  -2  819.76   72.18
  -2   6   2  811.20   63.62
   2  -6  -2  838.82   63.04
   1  -6  -2  773.46   68.25
   0  -6  -2   49.12    6.26
   0   6   2   31.36   16.31
   0  -6  -2   46.43   10.10
   1   6   2  117.98   19.44
   2   6   2  534.08   46.08
  -2  -6  -2  578.53   52.95
   3   6   2  610.63   51.44
  -3  -6  -2  633.56   60.44
   4   6   2   40.12   16.51
   4   6   2   -3.30    7.31
  -4  -6  -2   -0.29   11.47
  -5  -6  -2  363.21   47.71
   5   6   2  426.03   40.09
  -6  -6  -2   87.68   33.12
   6   6   2  136.33   29.65
   7   6   2   52.72   25.52
   8   6   2    6.53   25.26
   9   6   2  -35.43   24.20
  10   6   2  -23.05   32.62
  10  -7  -2  -17.47   22.46
   9  -7  -2  105.86   33.35
   8  -7  -2   -5.72   17.23
   7  -7  -2  673.63   64.79
   6  -7  -2    8.56   13.12
  -6   7   2  -10.90   11.67
  -5   7   2  543.09   42.57
   5  -7  -2  541.84   50.54
   5  -7  -2  561.39   51.43
  -4   7   2   38.72   14.51
   4  -7  -2   60.03   15.32
   4  -7  -2   29.40   10.04
  -3   7   2  847.06   66.36
   3  -7  -2  917.98   70.07
   3  -7  -2  906.74   78.46
   2  -7  -2   82.57   13.12
  -2   7   2   71.18   25.40
   2  -7  -2   84.80   13.17
  -1   7   2 1499.72  117.84
   1  -7  -2 1733.24  140.20
   1  -7  -2 1698.01  117.79
   0  -7  -2  308.97   23.97
   0  -7  -2  291.95   31.21
   0   7   2  273.97   33.07
   1   7   2   36.38   16.66
  -1  -7  -2   29.14    4.65
  -1  -7  -2   23.72    8.95
  -2  -7  -2  543.86   52.44
   2   7   2  539.53   46.92
  -3  -7  -2  945.43   87.34
   3   7   2  960.00   73.78
  -4  -7  -2  190.61   30.14
   4   7   2  245.79   28.65
  -5  -7  -2    1.92   14.04
   5   7   2   10.20   15.92
   6   7   2   12.11   20.23
  -6  -7  -2    0.78   17.53
   7   7   2  -17.19   23.66
   8   7   2  -10.09   31.49
   9   7   2  -54.56   30.99
  10   7   2  -60.47   39.14
  10  -8  -2   -2.99   22.99
   9  -8  -2  -18.70   18.93
   8  -8  -2   -2.39   17.88
   7  -8  -2   26.73   18.52
   6  -8  -2   66.63   20.63
   5  -8  -2  198.61   23.85
   5  -8  -2  177.47   25.31
  -4   8   2  135.27   19.39
   4  -8  -2  135.17   19.60
   4  -8  -2  125.24   18.08
   3  -8  -2  165.69   20.14
  -3   8   2  158.62   31.49
   3  -8  -2  171.17   20.56
   2  -8  -2    4.79    7.05
   2  -8  -2   11.44    9.13
   1  -8  -2 1026.11   75.27
   1  -8  -2 1034.18   89.44
  -1   8   2  986.99   78.40
   0  -8  -2  331.12   33.46
   0   8   2  296.06   32.35
   0  -8  -2  339.42   26.32
  -1  -8  -2 1395.64   96.62
   1   8   2 1328.58   99.85
  -1  -8  -2 1398.55  119.72
   2   8   2    0.14   14.39
  -2  -8  -2   -5.71    7.38
  -3  -8  -2 1366.75  120.93
   3   8   2 1346.26  100.44
   4   8   2   13.85   15.70
  -4  -8  -2   25.82   14.15
   5   8   2  386.79   40.83
  -5  -8  -2  380.24   45.86
  -6  -8  -2   95.30   27.08
   6   8   2  139.29   32.94
   7   8   2  169.48   39.73
   8   8   2  -14.24   22.45
   9   8   2   19.82   39.04
  10   8   2  -61.79   29.36
  10  -9  -2  -19.80   20.78
   9  -9  -2   55.37   30.47
   8  -9  -2    5.46   17.25
   7  -9  -2   58.56   20.83
   6  -9  -2   34.32   16.71
   5  -9  -2  269.60   31.56
   5  -9  -2  277.57   32.92
   4  -9  -2   58.09   16.31
   4  -9  -2   50.72   13.73
   3  -9  -2  231.87   26.43
  -3   9   2  282.51   45.16
   3  -9  -2  247.60   28.91
  -2   9   2  231.05   31.98
   2  -9  -2  246.34   24.67
   2  -9  -2  236.47   26.79
   1  -9  -2  293.42   32.20
  -1   9   2  275.09   31.95
   1  -9  -2  295.53   26.12
   0  -9  -2 1383.07   95.46
   0  -9  -2 1355.37  116.01
   0   9   2 1242.58   96.70
  -1  -9  -2  322.78   24.26
   1   9   2  301.23   32.57
  -1  -9  -2  300.28   33.31
   2   9   2  173.48   24.12
  -2  -9  -2  116.20   20.92
  -3  -9  -2   -7.69    8.99
   3   9   2   11.97   16.89
  -4  -9  -2  680.95   68.17
   4   9   2  670.12   59.47
  -5  -9  -2   37.74   18.67
   5   9   2   43.05   25.70
   6   9   2   23.38   25.60
  -6  -9  -2   14.73   18.60
   7   9   2   29.60   29.45
   8   9   2   37.02   35.07
  10   9   2  -62.99   37.48
  10 -10  -2   36.33   29.77
   9 -10  -2   -7.89   21.04
   8 -10  -2   57.20   25.72
   7 -10  -2    9.27   18.05
   6 -10  -2  226.37   31.43
   5 -10  -2   -5.34    8.52
   5 -10  -2   -1.99   10.88
   4 -10  -2  542.37   53.74
   4 -10  -2  551.71   50.01
   3 -10  -2   84.51   15.78
   3 -10  -2   81.24   17.35
  -2  10   2  235.89   32.96
   2 -10  -2  279.73   26.49
   2 -10  -2  265.46   29.69
   1 -10  -2  165.66   22.23
  -1  10   2  162.19   26.84
   1 -10  -2  175.47   18.77
   0 -10  -2  161.81   16.03
   0 -10  -2  132.42   21.91
   0  10   2  161.90   24.46
  -1 -10  -2   81.10   10.91
  -1 -10  -2   91.02   19.09
   1  10   2  133.03   27.50
   2  10   2    9.25   16.01
  -2 -10  -2   -0.98    7.71
   3  10   2    1.85   18.65
  -3 -10  -2   -2.99   10.72
   4  10   2   -2.63   19.53
  -4 -10  -2    1.19   13.25
   5  10   2  -12.32   19.11
  -5 -10  -2  -11.60   13.21
  -6 -10  -2   -1.53   16.56
   6  10   2    6.28   23.52
   7  10   2   41.66   36.18
   8  10   2  -19.03   30.74
   9 -11  -2   -1.46   21.29
   8 -11  -2   -0.96   19.80
   7 -11  -2   55.81   23.97
   6 -11  -2   21.15   17.39
   5 -11  -2  112.61   24.05
   5 -11  -2  103.87   20.93
   4 -11  -2  255.44   29.42
   4 -11  -2  250.91   31.26
   3 -11  -2  172.54   22.03
   3 -11  -2  170.02   24.76
   2 -11  -2  388.41   41.64
   2 -11  -2  405.49   35.81
  -1  11   2  155.84   25.55
   1 -11  -2  188.03   19.28
   1 -11  -2  175.39   23.52
   0  11   2  132.00   27.74
   0 -11  -2  100.25   13.03
   0 -11  -2   98.43   18.04
  -1 -11  -2   24.13   11.28
   1  11   2    5.65   17.33
   2  11   2 1284.74   95.56
  -2 -11  -2 1234.73  113.23
   3  11   2   75.83   27.28
  -3 -11  -2   68.93   18.75
  -4 -11  -2  120.78   27.27
   4  11   2  149.04   34.82
  -5 -11  -2  -18.71   13.68
   5  11   2  -18.53   22.59
  -6 -11  -2  325.62   45.78
   6  11   2  296.73   41.40
   7  11   2  -33.75   30.94
   8  11   2    3.40   41.10
   9 -12  -2  -24.99   19.87
   8 -12  -2   14.98   21.88
   7 -12  -2   -1.21   17.13
   6 -12  -2   89.07   25.03
   5 -12  -2   19.01   16.20
   5 -12  -2   11.80   13.96
   4 -12  -2  299.66   33.44
   4 -12  -2  295.65   36.86
   3 -12  -2  479.16   50.73
   3 -12  -2  495.67   44.71
   2 -12  -2   -7.94    8.82
   2 -12  -2    9.98    9.60
   1 -12  -2   11.95   11.14
   1 -12  -2   23.39    9.75
   0  12   2  101.94   25.47
   0 -12  -2   76.38   18.51
  -1 -12  -2  359.73   40.01
   1  12   2  358.02   37.30
   2  12   2   27.77   19.18
  -2 -12  -2   11.14   11.62
  -3 -12  -2  566.74   58.42
   3  12   2  550.62   52.45
  -4 -12  -2   -9.72   12.63
   4  12   2   -1.40   21.00
   5  12   2  225.09   46.29
  -5 -12  -2  178.63   33.86
   6  12   2   -9.58   30.82
  -6 -12  -2    5.16   19.45
   7  12   2  230.64   40.34
   9 -13  -2   61.32   31.45
   8 -13  -2   -6.22   19.16
   7 -13  -2   36.68   22.13
   6 -13  -2   -0.23   16.93
   5 -13  -2  315.89   38.23
   5 -13  -2  369.41   42.51
   4 -13  -2   15.64   14.60
   4 -13  -2    3.14   12.57
   3 -13  -2  152.61   21.53
   3 -13  -2  156.43   24.80
   2 -13  -2   12.93   10.62
   2 -13  -2    3.76   10.95
   1 -13  -2   49.16   12.56
   1 -13  -2   36.61   14.80
   0 -13  -2   -3.25    9.88
   1  13   2   65.60   24.55
  -1 -13  -2   60.48   17.58
   2  13   2   -4.08   18.05
  -2 -13  -2    3.54   12.98
  -3 -13  -2   -9.87   10.04
   3  13   2    4.71   21.17
  -4 -13  -2   -3.22   14.49
   4  13   2  -27.49   22.53
  -5 -13  -2   -0.08   15.22
   5  13   2  -31.89   26.66
  -6 -13  -2   29.81   20.45
   6  13   2    6.18   33.02
   7  13   2   -5.70   36.20
   8  13   2  -70.34   37.46
   8 -14  -2   21.53   22.38
   7 -14  -2  -18.94   18.52
   6 -14  -2   38.14   21.68
   5 -14  -2   25.11   17.73
   5 -14  -2    8.98   15.65
   4 -14  -2  485.67   51.68
   4 -14  -2  406.34   43.67
   3 -14  -2   91.16   17.61
   3 -14  -2  111.08   23.22
   2 -14  -2   20.90   16.74
   2 -14  -2   56.92   16.00
   1 -14  -2   90.06   20.07
   0 -14  -2  109.88   23.43
  -1 -14  -2  220.59   30.86
   2  14   2  -15.29   19.74
  -2 -14  -2   -3.95   12.62
   3  14   2  242.31   34.96
  -3 -14  -2  233.80   33.35
  -4 -14  -2    5.70   17.77
   4  14   2   20.56   25.48
   5  14   2  101.91   41.81
  -5 -14  -2   92.50   28.21
   6  14   2  -30.75   32.59
  -6 -14  -2   23.35   21.65
   7  14   2   27.85   44.47
   8  14   2  -63.72   38.51
   8 -15  -2   -0.38   21.61
   7 -15  -2    8.52   19.93
   6 -15  -2   -6.87   17.50
   5 -15  -2    3.61   14.58
   4 -15  -2   96.34   22.56
   4 -15  -2   85.58   23.80
   3 -15  -2   17.59   16.63
   3 -15  -2   10.76   11.84
   2 -15  -2  252.48   35.37
   1 -15  -2   52.77   19.09
   0 -15  -2  433.40   49.42
  -1 -15  -2   36.92   17.14
  -2 -15  -2  345.83   43.02
  -3 -15  -2   50.45   18.55
   3  15   2   24.36   26.48
  -4 -15  -2  136.53   29.80
   4  15   2  209.30   45.94
   5  15   2  -22.92   24.61
  -5 -15  -2    5.86   18.37
   6  15   2  177.54   52.77
  -6 -15  -2  182.79   36.60
   7  15   2  -65.66   39.88
   8  15   2  -85.86   41.79
   7 -16  -2  -13.57   15.94
   6 -16  -2  121.09   29.54
   5 -16  -2    4.72   16.09
   4 -16  -2  107.94   25.08
   4 -16  -2  116.93   24.67
   3 -16  -2   58.32   20.38
   2 -16  -2  265.03   36.56
   1 -16  -2   -1.05   14.48
   0 -16  -2   17.58   16.77
  -1 -16  -2   97.06   23.73
  -2 -16  -2    0.24   14.10
  -3 -16  -2   40.65   20.26
   4  16   2  -19.64   25.36
  -4 -16  -2   -3.69   14.72
  -5 -16  -2   47.01   24.13
   5  16   2    8.85   36.01
  -6 -16  -2   16.13   21.54
   6  16   2  -54.32   36.60
   7  16   2  -50.08   41.68
   7 -17  -2   16.56   23.44
   6 -17  -2    3.82   17.48
   5 -17  -2   58.33   23.03
   4 -17  -2   -4.62   17.23
   3 -17  -2  117.86   27.61
   2 -17  -2   27.17   19.01
   1 -17  -2   45.02   20.97
   0 -17  -2  107.44   26.40
  -1 -17  -2   -7.72   13.16
  -2 -17  -2    2.37   14.05
  -3 -17  -2   -1.58   13.38
  -4 -17  -2  113.38   28.14
  -5 -17  -2   -9.22   16.96
   5  17   2  -25.02   29.05
  -6 -17  -2   12.41   22.33
   6  17   2  -48.52   38.85
   6 -18  -2  -10.60   16.63
   4 -18  -2   -2.31   15.53
   3 -18  -2   -8.42   15.03
   2 -18  -2    7.03   18.99
   1 -18  -2  247.07   37.08
   0 -18  -2   24.05   18.91
  -1 -18  -2   78.92   23.20
  -2 -18  -2    0.28   14.84
  -3 -18  -2  109.23   27.43
  -4 -18  -2   10.45   18.69
  -5 -18  -2  138.71   32.85
  -6 -18  -2    3.09   20.44
   4 -19  -2  -14.54   18.13
   3 -19  -2   78.44   28.40
   2 -19  -2   13.26   18.25
   1 -19  -2  104.66   27.81
   0 -19  -2   76.26   24.84
  -1 -19  -2    9.88   16.22
  -2 -19  -2   11.66   17.20
  -3 -19  -2   55.57   22.54
  -4 -19  -2  120.70   32.19
  -5 -19  -2   -0.90   19.70
   4 -20  -2   23.64   22.74
   3 -20  -2   10.40   20.01
   2 -20  -2  145.04   35.74
   0 -20  -2   20.38   18.81
  -1 -20  -2   20.46   18.92
  -2 -20  -2   38.05   22.56
  -3 -20  -2   16.28   20.46
  -4 -20  -2   14.64   18.69
   3 -21  -2   15.26   23.39
   2 -21  -2   45.39   24.30
   1 -21  -2   15.81   20.86
   0 -21  -2   62.64   27.18
  -1 -21  -2   10.21   19.93
  -2 -21  -2   75.91   26.56
  -3 -21  -2    9.33   20.06
  -2 -21   3   -1.26   18.97
  -1 -21   3    3.66   21.30
   0 -21   3   42.75   26.14
   1 -21   3   10.31   21.85
   2 -21   3   -7.33   20.52
  -4 -20   3    2.97   16.65
  -3 -20   3   41.83   20.81
  -2 -20   3   -5.91   17.67
  -1 -20   3  145.47   30.40
   0 -20   3  -12.40   18.47
   1 -20   3  124.48   33.13
   2 -20   3  -12.24   18.74
   3 -20   3   91.61   30.56
   4 -20   3    0.07   20.84
  -5 -19   3   18.51   17.61
  -4 -19   3   39.20   20.87
  -3 -19   3    7.22   17.06
  -2 -19   3   45.48   21.19
  -1 -19   3   35.40   20.07
   0 -19   3  140.25   29.43
   1 -19   3  -10.10   17.04
   2 -19   3   29.23   24.05
   3 -19   3  -17.25   17.17
   4 -19   3   99.84   31.02
   5 -19   3   15.31   22.05
  -5 -18   3   10.43   16.91
  -4 -18   3   14.78   15.42
  -3 -18   3   -7.56   12.36
  -2 -18   3   67.38   23.67
  -1 -18   3    0.79   17.29
   0 -18   3  -11.49   14.14
   1 -18   3    4.12   16.72
   2 -18   3    2.64   20.66
   3 -18   3   -0.23   17.63
   4 -18   3   -2.04   18.25
   4 -18   3   -2.01   19.70
   5 -18   3    2.12   19.52
   5 -18   3    3.44   21.76
   6 -18   3   18.40   24.24
   7  17  -3  -14.84   34.81
  -5 -17   3   17.99   16.63
  -4 -17   3   41.83   18.22
  -3 -17   3    3.06   15.34
  -2 -17   3  120.25   23.73
  -1 -17   3   91.28   24.99
   0 -17   3  155.59   28.78
   1 -17   3   15.48   16.56
   2 -17   3   44.57   20.80
   3 -17   3   28.14   20.59
   3 -17   3   22.29   20.74
   4 -17   3   58.96   23.56
   4 -17   3   71.77   24.34
   5 -17   3   10.92   18.51
   5 -17   3   -5.23   19.62
   6 -17   3   -3.52   24.20
   7 -17   3  -23.02   23.59
   7  16  -3  -22.95   33.61
   6  16  -3  -36.11   24.60
  -5 -16   3  101.58   22.36
  -4 -16   3   98.22   22.03
  -3 -16   3   54.01   18.15
  -2 -16   3   -0.63   12.02
  -1 -16   3  301.78   39.46
   0 -16   3    0.93   13.24
   1 -16   3  207.50   33.40
   2 -16   3    0.64   14.32
   2 -16   3   -5.18   13.94
   3 -16   3  147.47   28.75
   3 -16   3  205.89   31.71
   4 -16   3   -0.30   17.67
   4 -16   3    6.88   16.90
   5 -16   3  131.76   28.11
   5 -16   3   77.26   29.17
   6 -16   3   -3.52   18.37
   7 -16   3  -18.24   22.41
   7  15  -3   25.70   35.80
   6  15  -3   -3.01   27.57
  -5 -15   3   56.72   19.46
   5  15  -3   58.78   26.85
  -4 -15   3   -4.75   11.66
   4  15  -3   -5.36   17.76
  -3 -15   3   67.09   19.24
  -2 -15   3   -3.18   12.99
  -1 -15   3   -4.80   11.83
   0 -15   3   21.42   15.22
   1 -15   3   -3.26   14.32
   2 -15   3   -1.32   15.40
   2 -15   3    5.09   15.37
   3 -15   3   23.57   20.24
   3 -15   3    4.02   17.12
   4 -15   3   78.51   22.43
   4 -15   3   51.66   24.68
   5 -15   3   15.84   18.30
   5 -15   3   13.28   21.33
   6 -15   3   -8.51   18.47
   7 -15   3    4.02   24.44
   8 -15   3  -37.31   22.92
   8  14  -3   38.59   34.85
   7  14  -3   60.23   33.51
   6  14  -3   67.00   29.47
  -5 -14   3    8.96   14.37
   5  14  -3   -8.97   19.96
   4  14  -3   97.78   25.64
  -4 -14   3   54.80   18.96
   3  14  -3  400.66   37.07
  -3 -14   3  376.59   43.29
  -2 -14   3   17.80   13.36
  -1 -14   3   89.77   19.63
   0 -14   3   17.97   15.87
   1 -14   3  358.81   40.65
   1 -14   3  389.42   44.42
   2 -14   3   24.97   16.53
   2 -14   3   69.25   23.51
   3 -14   3   73.24   20.89
   3 -14   3   66.85   22.72
   4 -14   3    3.63   15.54
   4 -14   3   -9.22   13.87
   5 -14   3   19.18   19.30
   5 -14   3    6.78   15.56
   6 -14   3   -5.19   16.99
   7 -14   3   21.60   24.01
   8 -14   3  -23.41   22.73
   9  13  -3  -24.19   32.75
   8  13  -3   61.51   39.77
   7  13  -3  -21.80   25.84
   6  13  -3  192.04   39.48
   5  13  -3  -11.52   18.50
  -5 -13   3   10.71   12.96
   4  13  -3  304.82   31.49
  -4 -13   3  290.99   36.24
   3  13  -3   21.04   14.93
  -3 -13   3   -0.68   10.19
   2  13  -3  586.09   44.99
  -2 -13   3  557.85   56.85
  -1 -13   3   33.29   13.38
   0 -13   3  182.46   26.29
   0 -13   3  185.78   25.40
   1 -13   3   53.18   19.06
   1 -13   3   21.91   15.04
   2 -13   3  403.65   44.51
   3 -13   3   20.19   16.55
   4 -13   3  155.32   28.40
   5 -13   3   -6.64   15.02
   6 -13   3  117.41   35.40
   7 -13   3  -11.93   19.13
   8 -13   3   -8.00   22.33
   9  12  -3  -34.89   31.54
   8  12  -3  142.42   43.71
   7  12  -3   23.39   25.25
   6  12  -3   63.17   25.86
   5  12  -3   12.60   17.18
  -5 -12   3   20.83   15.29
   4  12  -3  389.30   37.74
  -4 -12   3  422.60   44.64
  -3 -12   3  252.87   33.15
   3  12  -3  315.85   28.95
   2  12  -3   23.58   11.40
  -2 -12   3    2.60   10.15
  -1 -12   3   -6.61   11.49
  -1 -12   3  -10.83    7.65
   0 -12   3  158.88   22.88
   0 -12   3  138.55   23.30
   1 -12   3  109.36   20.13
   2 -12   3    8.47   14.32
   3 -12   3  134.40   29.79
   4 -12   3   56.51   22.10
   5 -12   3    0.63   15.83
   6 -12   3   -8.90   17.92
   7 -12   3   31.29   24.82
   8 -12   3   -4.69   22.54
   9  11  -3   39.85   36.02
   8  11  -3   -8.54   30.22
   7  11  -3   38.55   26.72
   6  11  -3   65.37   27.92
   5  11  -3  171.34   25.48
  -5 -11   3  195.00   27.97
   4  11  -3   17.21   13.16
  -4 -11   3   14.88   10.87
   3  11  -3  108.29   16.66
  -3 -11   3   99.69   18.23
  -2 -11   3   70.52   16.39
   2  11  -3   84.26   13.76
  -1 -11   3   66.14   19.80
  -1 -11   3   55.68   15.50
   1  11  -3   63.43   10.82
   0 -11   3  204.16   27.39
   1 -11   3   44.41   16.36
   2 -11   3  132.15   23.73
   3 -11   3  197.54   29.12
   4 -11   3  186.98   30.09
   5 -11   3   44.35   22.22
   6 -11   3    7.57   17.46
   7 -11   3   66.94   29.02
   8 -11   3  -14.72   23.63
   9 -11   3  -16.29   23.88
  10  10  -3  -61.00   36.10
   9  10  -3  -22.22   29.98
   8  10  -3   14.09   30.57
   7  10  -3  153.24   34.74
   6  10  -3    6.29   19.35
   5  10  -3  162.76   24.05
  -5 -10   3  188.85   26.75
  -4 -10   3  272.41   32.44
   4  10  -3  285.14   28.59
   3  10  -3  951.04   67.45
  -3 -10   3  900.25   83.42
  -2 -10   3   43.89   11.36
   2  10  -3   37.36   11.53
  -2 -10   3   38.23   19.13
   1  10  -3  857.43   59.39
  -1 -10   3  916.97   78.20
  -1 -10   3  797.44   74.34
   0 -10   3  122.33   25.54
   0  10  -3   91.53   10.97
   1 -10   3  681.46   61.73
   2 -10   3   35.94   15.90
   3 -10   3  552.10   55.20
   4 -10   3    1.67   13.02
   5 -10   3  117.77   29.82
   6 -10   3   25.02   20.85
   7 -10   3   68.52   27.59
   8 -10   3  -25.90   21.02
   9 -10   3  -22.49   21.79
  10   9  -3  -59.29   29.77
   9   9  -3   37.92   32.66
   8   9  -3    2.84   27.29
   7   9  -3  218.90   30.22
   6   9  -3  134.29   27.34
   5   9  -3  126.20   21.35
  -5  -9   3  163.28   24.22
   4   9  -3  332.39   31.17
  -4  -9   3  360.51   37.41
  -3  -9   3   -6.51    5.91
   3   9  -3    3.38    9.58
  -2  -9   3  683.58   61.80
   2   9  -3  663.57   49.02
  -1  -9   3  246.10   34.73
   1   9  -3  271.59   21.57
   0  -9   3  285.06   34.97
   0   9  -3  299.45   22.09
   1  -9   3   23.51   14.22
  -1   9  -3   21.83    4.49
   2  -9   3  704.23   63.66
   3  -9   3  120.81   25.64
   4  -9   3   68.52   22.72
   5  -9   3   66.53   21.12
   6  -9   3  129.37   30.87
   7  -9   3  -11.27   16.05
   8  -9   3   11.95   25.23
   9  -9   3  -11.62   22.14
  10  -9   3  -27.99   28.15
  10   8  -3   28.36   39.71
   9   8  -3   -6.99   30.20
   8   8  -3   86.56   31.44
   7   8  -3   14.45   21.48
   6   8  -3  245.13   28.41
   5   8  -3  101.39   16.95
  -5  -8   3   91.78   20.23
  -4  -8   3   81.22   15.64
   4   8  -3   84.09   17.90
   3   8  -3   39.75   11.55
  -2  -8   3   32.93    9.52
   2   8  -3   53.76   11.28
   1   8  -3  244.61   20.21
  -1  -8   3  242.40   36.62
   0  -8   3   15.85   13.74
   0   8  -3   15.19    5.41
   1  -8   3   54.23   18.81
   2  -8   3   54.24   15.73
   4  -8   3   35.65   16.29
   5  -8   3   11.13   15.22
   6  -8   3  112.86   28.48
   7  -8   3   -1.18   18.30
   8  -8   3   15.88   24.30
   9  -8   3  -14.59   22.14
  10  -8   3  -22.49   28.89
  11   7  -3  -42.78   35.46
  10   7  -3  -21.11   30.71
   9   7  -3   42.17   28.14
   8   7  -3  -23.99   20.92
   7   7  -3   96.45   26.11
   6   7  -3  315.89   32.30
  -5  -7   3   -2.73    9.58
   5   7  -3   19.68   12.38
   4   7  -3  454.98   39.18
  -4  -7   3  533.38   48.31
   3   7  -3   76.33   12.56
  -3  -7   3   51.12   11.66
   2   7  -3  533.61   38.57
  -2  -7   3  520.88   48.09
   1   7  -3  238.03   18.21
  -1  -7   3  202.57   35.94
   0  -7   3 2464.36  186.31
   0   7  -3 2485.44  160.41
   1  -7   3   15.51   12.13
   2  -7   3  239.72   29.45
   3  -7   3    3.22   10.38
   4  -7   3  857.84   76.22
   5  -7   3   89.38   24.32
   6  -7   3  124.05   29.87
   7  -7   3  -12.66   16.14
   8  -7   3   19.54   21.60
   9  -7   3  -36.00   20.33
  10  -7   3  -10.16   24.72
  11   6  -3  -70.75   35.52
  10   6  -3  -37.91   30.01
   9   6  -3   24.67   27.28
   8   6  -3   42.51   26.18
   7   6  -3   72.57   22.46
   6   6  -3  169.36   22.53
  -5  -6   3  721.99   65.52
   5   6  -3  677.19   53.97
  -4  -6   3   96.11   14.34
   4   6  -3   73.09   12.98
   3   6  -3   74.25   12.95
  -3  -6   3   62.07   10.85
   2   6  -3  699.01   49.03
  -1  -6   3 2144.15  174.82
   0  -6   3   -8.91   10.57
   0   6  -3    3.51    3.37
   1  -6   3 1490.72  115.68
   2  -6   3   -4.43    6.76
   3  -6   3  586.11   54.69
   4  -6   3   -1.60    5.36
   4  -6   3    2.03   11.59
   5  -6   3  421.67   46.26
   6  -6   3   16.39   17.36
   7  -6   3   22.15   21.41
   8  -6   3   -7.18   20.61
   9  -6   3   -3.51   24.03
  10  -6   3  -40.36   24.59
  11   5  -3  -26.28   37.27
   9   5  -3   73.17   31.20
   8   5  -3   36.86   25.01
   7   5  -3  428.31   44.15
   7   5  -3  480.99   43.15
   6   5  -3    2.22   10.62
   6   5  -3   21.96   13.60
   5   5  -3  390.31   35.18
   5   5  -3  431.19   40.22
  -5  -5   3  420.61   41.41
   4   5  -3   36.39   12.81
  -4  -5   3   17.82    9.36
   3   5  -3  170.33   17.09
  -3  -5   3  191.10   19.73
   2   5  -3   50.72    7.86
   1   5  -3  914.02   61.15
   0   5  -3  319.79   21.04
   0  -5   3  280.97   34.57
   1  -5   3   28.08   12.38
   2  -5   3   66.12   17.12
   3  -5   3   41.49    5.71
   3  -5   3   31.57   13.94
   4  -5   3    2.31    6.17
   4  -5   3   -4.11   11.62
   5  -5   3  115.68   25.49
   5  -5   3   82.24   11.52
   6  -5   3   24.29   17.47
   7  -5   3   86.90   28.25
   8  -5   3  -10.56   19.11
   9  -5   3    4.08   23.20
  11  -5   3  -48.41   27.23
  10   4  -3  -39.08   25.30
   9   4  -3   20.45   23.37
   8   4  -3    5.38   17.93
   8   4  -3   29.39   21.23
   7   4  -3  199.00   26.40
   7   4  -3  154.70   27.67
   6   4  -3  228.14   28.86
   6   4  -3  230.35   26.04
   5   4  -3  143.96   22.11
  -5  -4   3  115.19   20.55
   5   4  -3  175.03   19.18
  -4  -4   3  185.27   20.61
   4   4  -3  193.73   23.04
   4   4  -3  175.67   19.39
   3   4  -3  433.38   35.74
  -3  -4   3  535.86   43.47
   2   4  -3   59.13    7.66
   1   4  -3 1440.50   94.53
   0  -4   3  341.35   37.98
   1  -4   3  331.87   33.27
   2  -4   3   19.90   10.46
   3  -4   3  606.05   39.59
   3  -4   3  538.68   51.55
   4  -4   3  284.10   34.66
   4  -4   3  353.05   25.17
   5  -4   3  239.68   32.23
   5  -4   3  275.16   22.79
   6  -4   3  226.88   22.21
   6  -4   3  246.48   33.89
   7  -4   3   92.48   28.66
   8  -4   3   25.95   23.42
   9  -4   3   -4.43   23.30
  10  -4   3  -14.81   28.28
  11  -4   3  -41.37   23.82
  10   3  -3  -25.55   28.07
   9   3  -3   17.36   23.37
   9   3  -3   53.50   27.33
   8   3  -3  142.88   25.94
   8   3  -3  139.07   33.06
   7   3  -3   51.17   18.63
   7   3  -3   18.79   17.68
   6   3  -3  440.56   43.58
   6   3  -3  412.47   37.23
   5   3  -3    8.31   11.03
   5   3  -3   14.74   10.89
   4   3  -3 1934.29  135.08
  -4  -3   3 2025.64  168.85
   4   3  -3 2093.23  147.34
   3   3  -3   48.26    9.98
  -3  -3   3   54.78    7.73
   2   3  -3  525.46   37.05
   1   3  -3    0.29    2.73
   0  -3   3 1521.68  119.40
   1  -3   3  123.65   17.77
   3  -3   3 1107.94   92.03
   3  -3   3 1239.12   78.99
   4  -3   3  927.94   79.15
   4  -3   3  990.17   66.59
   5  -3   3    1.51    6.83
   5  -3   3    4.14   11.43
   6  -3   3  224.65   31.94
   6  -3   3  239.93   23.62
   7  -3   3   48.80   24.62
   7  -3   3   81.03   18.67
   8  -3   3   86.41   31.28
   9  -3   3   -6.53   23.50
  10  -3   3   -2.86   27.46
  11  -3   3  -34.69   27.47
  10   2  -3   50.00   32.79
   9   2  -3    6.57   20.16
   9   2  -3  -13.70   22.37
   8   2  -3  472.54   46.92
   8   2  -3  572.11   57.54
   7   2  -3   17.03   20.23
   7   2  -3   36.83   16.37
   6   2  -3  522.12   44.78
   6   2  -3  563.04   52.23
   5   2  -3  678.35   53.18
   5   2  -3  751.07   60.54
  -4  -2   3 1143.08  102.40
   4   2  -3 1227.37   91.56
   4   2  -3 1253.65   83.61
   3   2  -3  189.07   17.84
   3   2  -3  208.76   21.29
  -3  -2   3  220.28   19.28
   2   2  -3  354.16   32.19
   1   2  -3  316.25   22.30
   0  -2   3   69.84    6.73
   1  -2   3   28.81   10.51
   2  -2   3  501.84   35.94
   2  -2   3  474.18   42.77
   3  -2   3    3.20    6.96
   3  -2   3    4.28    9.03
   4  -2   3  550.65   51.12
   4  -2   3  577.96   42.62
   5  -2   3  201.35   20.19
   5  -2   3  166.46   25.20
   6  -2   3   14.82   13.09
   6  -2   3    1.55   11.71
   7  -2   3    1.48   15.75
   7  -2   3   13.60   14.26
   8  -2   3   66.49   27.24
   8  -2   3  145.25   28.08
   9  -2   3    8.42   24.10
  10  -2   3   -5.60   24.20
  10   1  -3  -32.84   22.50
  10   1  -3  -18.88   18.68
   9   1  -3  155.64   36.52
   9   1  -3  190.53   39.28
   8   1  -3  237.59   29.51
   8   1  -3  187.32   33.28
   7   1  -3  253.53   35.89
   7   1  -3  260.91   29.25
   6   1  -3   73.97   17.16
   6   1  -3   51.15   18.87
   5   1  -3  496.53   40.29
   5   1  -3  515.76   46.26
   4   1  -3  413.53   38.15
   4   1  -3  428.09   33.80
   3   1  -3    2.13    5.98
   3   1  -3   10.74    7.21
   2   1  -3   42.19    7.85
   2   1  -3   41.19    6.51
   1   1  -3   58.56    5.82
   0  -1   3  466.60   32.78
   1  -1   3  165.41   16.51
   1  -1   3  155.14   18.19
   2  -1   3 8517.75  607.17
   2  -1   3 8967.02  565.68
   3  -1   3  538.74   40.50
   3  -1   3  523.16   46.26
   4  -1   3  118.62   19.92
   4  -1   3  159.52   17.55
   5  -1   3   27.48   11.98
   5  -1   3   22.51   14.08
   6  -1   3  144.12   20.29
   6  -1   3  133.65   27.03
   7  -1   3  111.74   27.61
   7  -1   3   99.08   24.76
   8  -1   3   -3.17   19.95
   8  -1   3   11.99   16.09
   9  -1   3   63.00   30.78
   9  -1   3   21.00   23.29
  10  -1   3  -17.10   24.92
  11   0  -3  -41.09   22.76
  10   0  -3  -25.43   21.11
   9   0  -3   19.59   23.13
   9   0  -3    4.35   20.13
   8   0  -3    5.21   18.96
   8   0  -3   18.27   17.88
   7   0  -3  384.77   36.60
   7   0  -3  392.43   43.87
   6   0  -3    7.58   10.92
   6   0  -3   -4.89   12.86
   5   0  -3  104.64   15.68
   5   0  -3  154.99   23.37
   4   0  -3   -1.75    7.91
   3   0  -3 2578.34  169.74
   3   0  -3 2597.79  183.58
   2   0  -3   -1.20    3.44
   2   0  -3   -0.33    3.12
   1   0  -3 1152.08   83.21
   1   0   3 1641.03  125.48
   1   0   3 1830.75  118.80
   2   0   3  140.39   18.02
   3   0   3 5474.61  344.96
   3   0   3 5073.68  369.51
   4   0   3   -6.01    8.50
   4   0   3   -2.42    8.90
   5   0   3  211.81   26.07
   5   0   3  182.29   22.52
   6   0   3   -2.28   13.68
   6   0   3   -1.57   12.53
   7   0   3  461.61   42.08
   7   0   3  376.52   44.57
   8   0   3   -7.09   16.03
   8   0   3  -10.67   19.27
   9   0   3    6.36   22.98
   9   0   3   10.26   26.56
  11  -1  -3  -20.75   28.52
  10  -1  -3  -12.41   21.50
   9  -1  -3  154.05   27.07
   9  -1  -3  194.86   41.01
   8  -1  -3  210.81   35.07
   8  -1  -3  238.20   28.57
   7  -1  -3  261.98   27.94
   7  -1  -3  234.47   33.77
   6  -1  -3   40.84   19.62
   6  -1  -3   60.48   16.98
   5  -1  -3  342.46   34.89
   5  -1  -3  346.64   29.72
   4  -1  -3  393.16   32.09
   4  -1  -3  414.16   37.39
   3  -1  -3    8.95    6.79
   2  -1  -3   33.22    5.49
   2  -1  -3   45.24    8.42
  -1   1   3   69.46    7.50
   1  -1  -3   65.95    7.66
   0   1   3  537.66   41.21
   1   1   3  146.03   16.38
   1   1   3  190.46   19.46
   2   1   3 9556.58  675.93
   2   1   3 9999.95  634.39
   3   1   3  621.87   53.04
   3   1   3  717.65   52.45
   4   1   3  129.75   17.83
   4   1   3  123.69   18.02
   5   1   3   35.10   13.50
   5   1   3   30.79   14.24
   6   1   3  141.76   22.84
   6   1   3  108.06   19.63
   7   1   3   92.19   25.48
   7   1   3  165.86   25.72
   8   1   3   10.59   23.63
   8   1   3   -1.13   19.69
   9   1   3   74.33   36.64
  11   1   3  -69.90   41.96
  10  -2  -3  117.27   35.98
  10  -2  -3   63.19   27.02
   9  -2  -3   -4.26   19.98
   9  -2  -3   -6.85   18.06
   8  -2  -3  462.13   41.84
   8  -2  -3  443.83   51.12
   7  -2  -3   26.55   14.93
   7  -2  -3    3.14   16.93
   6  -2  -3  446.72   45.43
   6  -2  -3  485.21   39.48
   5  -2  -3  661.09   57.83
   5  -2  -3  696.30   51.14
   4  -2  -3 1258.78   85.60
   4  -2  -3 1229.48   94.23
   3  -2  -3  194.41   20.15
   3  -2  -3  167.62   16.56
   2  -2  -3  294.57   27.68
   2  -2  -3  269.75   23.88
   1  -2  -3  378.33   35.50
   1  -2  -3  337.94   27.68
  -1   2   3  367.17   27.53
   0   2   3   63.82   15.60
   0  -2  -3   50.27   10.75
   0  -2  -3   68.89    7.01
  -1  -2  -3   23.76    9.36
   1   2   3   24.88   12.55
   2   2   3  564.60   44.54
   2   2   3  598.29   47.01
   3   2   3   13.41   10.46
   3   2   3    0.17    6.62
   4   2   3  615.24   48.18
   4   2   3  539.62   46.88
   5   2   3  193.40   23.16
   5   2   3  144.20   22.79
   6   2   3   10.25   14.20
   6   2   3   21.16   17.62
   7   2   3    1.78   17.27
   7   2   3   -2.08   17.21
   8   2   3  148.53   28.61
   8   2   3  168.14   38.49
   9   2   3   32.52   31.30
  10   2   3  -65.62   31.77
  11  -3  -3  -25.05   22.79
  10  -3  -3  -23.09   19.57
   9  -3  -3   22.29   22.98
   9  -3  -3   -0.11   18.23
   8  -3  -3  112.83   24.31
   8  -3  -3   76.13   28.28
   7  -3  -3   30.86   18.34
   7  -3  -3   38.83   16.20
   6  -3  -3  379.89   38.98
   6  -3  -3  340.07   31.97
   5  -3  -3   22.33   11.61
   5  -3  -3   20.15   13.17
   4  -3  -3 1976.73  141.44
   4  -3  -3 2012.00  161.26
   4  -3  -3 1792.66  128.52
   3  -3  -3   61.07    9.18
   3  -3  -3   21.04    8.11
   3  -3  -3   29.11    8.47
   2  -3  -3  620.62   53.51
   2  -3  -3  588.48   46.37
   1  -3  -3    1.47    4.45
  -1   3   3   19.90    7.59
   1  -3  -3    5.57    3.51
   0  -3  -3 2671.23  185.25
   1   3   3  140.64   19.35
  -1  -3  -3  127.96   18.58
   2   3   3 1241.29   90.53
  -2  -3  -3 1250.53  112.13
   3   3   3 1220.69   89.08
   4   3   3 1045.36   82.02
   4   3   3 1173.13   83.57
   5   3   3   -5.43   10.01
   5   3   3    6.88   12.88
   6   3   3  254.66   31.41
   6   3   3  302.48   33.23
   7   3   3   78.04   26.71
   7   3   3   91.97   24.39
   8   3   3  134.15   35.02
   9   3   3   -9.10   31.86
  10   3   3  -42.39   32.15
  11  -4  -3  -14.60   24.04
  10  -4  -3   -0.90   22.76
   9  -4  -3   24.89   22.84
   8  -4  -3   23.60   19.34
   8  -4  -3   11.83   14.66
   7  -4  -3  140.58   25.68
   7  -4  -3  144.93   19.71
   6  -4  -3  198.27   26.89
   6  -4  -3  171.14   20.68
   5  -4  -3  137.94   17.70
   5  -4  -3  129.48   20.87
   4  -4  -3  133.33   16.78
   4  -4  -3  156.91   19.69
   4  -4  -3  135.91   16.33
   3  -4  -3  444.88   39.06
  -3   4   3  460.41   34.95
   3  -4  -3  489.79   42.26
   2  -4  -3   57.42    9.49
  -2   4   3   91.95   11.16
   2  -4  -3   61.39   10.14
   1  -4  -3 1724.17  124.03
   1  -4  -3 1750.73  148.61
  -1   4   3 1804.24  122.10
   0  -4  -3  602.71   43.38
   2   4   3   14.30   16.55
  -2  -4  -3   25.79   11.14
   3   4   3  627.60   50.61
  -3  -4  -3  559.93   61.15
   4   4   3  339.59   33.63
  -4  -4  -3  304.68   44.92
   5   4   3  365.85   32.42
   5   4   3  278.91   33.30
   6   4   3  304.62   35.97
   6   4   3  363.06   34.81
   7   4   3  140.63   32.90
   8   4   3   20.52   28.31
   9   4   3   -7.85   33.07
  10   4   3  -10.66   39.59
  11  -5  -3   80.88   37.99
  10  -5  -3  -27.33   18.50
   9  -5  -3   72.44   29.16
   8  -5  -3   50.32   22.93
   7  -5  -3  360.59   40.64
   7  -5  -3  323.81   30.95
   6  -5  -3  -12.12   10.30
   6  -5  -3   -8.32   10.31
   5  -5  -3  395.42   34.23
   5  -5  -3  419.73   40.23
   5  -5  -3  412.36   38.91
  -4   5   3   74.70   12.53
   4  -5  -3   36.53   13.36
  -3   5   3  183.91   18.50
   3  -5  -3  179.83   19.74
   3  -5  -3  162.22   19.11
  -2   5   3  104.75   15.48
   2  -5  -3   56.10   10.63
   1  -5  -3 1007.08   72.72
   1  -5  -3 1046.27   87.44
  -1   5   3  959.05   77.46
   0  -5  -3  383.45   34.84
   0  -5  -3  350.90   25.76
   0   5   3  272.70   35.30
   1   5   3   51.19   20.60
  -1  -5  -3   41.43   10.87
  -2  -5  -3   12.25    9.03
   2   5   3  -10.58   15.44
   3   5   3   34.64   17.56
  -3  -5  -3   20.77   12.31
   4   5   3    1.10   15.64
   4   5   3   -6.59    6.33
  -4  -5  -3   -5.88   13.04
   5   5   3  102.97   15.27
  -5  -5  -3   79.41   31.84
   5   5   3  133.72   29.09
   6   5   3   -3.37   16.01
   7   5   3  105.71   31.37
   8   5   3  -12.17   24.53
   9   5   3   -8.71   34.56
  10   5   3  -73.28   34.49
  11  -6  -3   -9.77   23.78
  10  -6  -3   -6.70   19.63
   9  -6  -3   15.48   20.80
   8  -6  -3   20.38   19.40
   7  -6  -3   40.13   19.57
   6  -6  -3  136.79   22.89
  -5   6   3  647.95   49.76
   5  -6  -3  683.44   60.02
   5  -6  -3  636.41   56.91
   4  -6  -3   98.35   16.86
  -4   6   3  110.44   14.73
   4  -6  -3  109.58   15.40
   3  -6  -3   62.90   12.17
   3  -6  -3   65.13   11.96
  -3   6   3   89.89   14.09
   2  -6  -3  763.14   68.18
   2  -6  -3  769.11   58.58
  -2   6   3  767.32   61.13
   1  -6  -3 2996.51  253.76
   1  -6  -3 3078.23  212.25
   0   6   3   -8.65   13.89
  -1  -6  -3 2049.31  168.22
   1   6   3 1885.68  139.50
  -2  -6  -3   -2.92    7.75
   2   6   3  -12.58   12.46
   3   6   3  717.14   59.70
  -3  -6  -3  696.21   68.70
   4   6   3   -2.11    5.29
  -4  -6  -3   -8.60   10.76
   4   6   3   -3.38   13.74
  -5  -6  -3  421.60   53.80
   5   6   3  450.70   44.36
   6   6   3    3.11   18.31
   7   6   3   28.21   27.30
   8   6   3  -27.18   22.46
   9   6   3   11.51   39.09
  10   6   3  -61.75   34.52
  10  -7  -3   16.65   21.05
   9  -7  -3   42.86   24.33
   8  -7  -3    2.15   16.87
   7  -7  -3   47.34   20.75
   6  -7  -3  231.95   30.68
  -6   7   3  280.68   26.08
   5  -7  -3   -4.56    8.93
   5  -7  -3   10.04   12.64
  -5   7   3   13.16   13.10
   4  -7  -3  479.84   42.68
   4  -7  -3  484.48   45.27
  -4   7   3  448.20   38.59
  -3   7   3   60.10   19.41
   3  -7  -3   84.33   13.43
   2  -7  -3  627.20   51.91
  -2   7   3  741.99   59.44
   2  -7  -3  642.66   60.67
  -1   7   3  177.88   32.54
   1  -7  -3  258.51   26.71
   1  -7  -3  241.95   20.61
   0   7   3 2395.04  183.61
   0  -7  -3 2786.78  223.33
   0  -7  -3 2752.65  184.30
  -1  -7  -3  140.02   19.23
   2   7   3  359.28   38.48
  -2  -7  -3  343.28   38.45
   3   7   3   -2.62   15.70
  -3  -7  -3    5.33   10.51
  -4  -7  -3  885.91   88.54
   4   7   3  986.47   76.85
  -5  -7  -3   99.53   25.97
   5   7   3  105.45   28.73
   6   7   3  185.35   31.06
  -6  -7  -3   97.71   33.07
   7   7   3  -32.70   16.92
   8   7   3   35.97   35.35
   9   7   3  -47.93   27.49
  10   7   3  -51.60   41.88
   9  -8  -3   -1.10   19.07
   8  -8  -3   79.91   27.53
   7  -8  -3    1.50   14.33
   6  -8  -3  198.57   27.72
   5  -8  -3   80.87   17.02
  -5   8   3   96.97   20.90
   5  -8  -3   94.47   21.22
   4  -8  -3   65.38   14.74
  -4   8   3   68.25   19.78
   4  -8  -3   86.49   17.94
   3  -8  -3    2.98    8.44
   3  -8  -3    3.48    7.66
  -3   8   3    9.97   18.11
  -2   8   3   15.57   24.30
   2  -8  -3   49.96   11.29
   2  -8  -3   40.17   10.56
  -1   8   3  420.45   42.90
   1  -8  -3  337.40   36.77
   1  -8  -3  339.55   30.04
   0   8   3   23.57   17.97
   0  -8  -3   11.00    9.20
   1   8   3   94.91   26.57
  -1  -8  -3   55.25   14.73
  -2  -8  -3   51.79   15.61
   2   8   3   51.24   21.58
  -3  -8  -3   -8.97   10.49
   3   8   3  -26.89   16.45
  -4  -8  -3   62.82   18.52
   4   8   3   62.55   24.19
  -5  -8  -3   13.57   16.62
   5   8   3   10.33   23.14
   6   8   3  224.65   44.02
  -6  -8  -3  142.25   33.97
   7   8   3  -33.17   20.02
   8   8   3   -2.73   35.15
  10   8   3  -41.53   37.26
  10  -9  -3  -20.81   20.69
   9  -9  -3   76.69   30.36
   8  -9  -3   38.75   21.82
   7  -9  -3  207.30   31.43
   6  -9  -3   96.75   23.42
   5  -9  -3  136.53   21.96
   5  -9  -3  146.82   22.11
   4  -9  -3  341.28   35.37
   4  -9  -3  307.28   32.64
   3  -9  -3    0.02    8.35
   3  -9  -3   -1.76    8.38
  -3   9   3  -11.32   23.28
   2  -9  -3  642.62   51.39
  -2   9   3  656.09   62.15
   2  -9  -3  641.22   60.47
   1  -9  -3  288.95   25.83
   1  -9  -3  297.98   32.83
  -1   9   3  299.00   36.41
   0   9   3  267.03   35.02
   0  -9  -3  286.26   31.80
   0  -9  -3  288.18   23.53
   1   9   3   30.48   21.72
  -1  -9  -3   22.49    5.18
  -1  -9  -3   26.80   11.18
   2   9   3  846.63   72.40
  -2  -9  -3  938.42   83.39
   3   9   3   77.03   25.40
  -3  -9  -3  136.36   23.16
   4   9   3   91.83   31.48
  -4  -9  -3   83.52   22.92
   5   9   3  110.05   31.89
  -5  -9  -3   87.31   23.56
  -6  -9  -3  138.18   33.98
   6   9   3  189.61   42.31
   7   9   3  -25.44   24.11
   8   9   3  -11.37   37.82
  10 -10  -3   -9.31   20.28
   9 -10  -3  -10.98   17.26
   8 -10  -3   18.87   20.63
   7 -10  -3   75.66   24.19
   6 -10  -3    1.78   13.45
   5 -10  -3  166.03   24.54
   5 -10  -3  176.54   24.57
   4 -10  -3  240.99   27.89
   4 -10  -3  250.19   30.20
   3 -10  -3  877.96   71.25
   3 -10  -3  933.85   82.94
   2 -10  -3   43.90   11.06
   2 -10  -3   31.97   12.60
  -2  10   3   27.74   24.48
   1 -10  -3  877.81   66.69
   1 -10  -3  894.26   81.49
  -1  10   3  896.56   74.46
   0 -10  -3  108.07   18.15
   0 -10  -3  122.56   12.42
   0  10   3   95.64   29.72
  -1 -10  -3  805.20   75.53
   1  10   3  805.13   68.45
   2  10   3   15.77   18.26
  -2 -10  -3   35.90   13.45
   3  10   3  565.66   55.90
  -3 -10  -3  671.21   63.63
  -4 -10  -3   12.81   15.06
   4  10   3   -7.58   22.51
  -5 -10  -3  128.07   28.92
   5  10   3  224.46   35.62
  -6 -10  -3   36.11   23.28
   6  10   3   39.96   29.94
   7  10   3  144.97   47.56
   9 -11  -3   63.66   27.92
   8 -11  -3  -13.64   15.17
   7 -11  -3   34.34   21.07
   6 -11  -3   94.85   25.15
   5 -11  -3  184.24   26.49
   5 -11  -3  198.27   28.40
   4 -11  -3   22.32   13.09
   4 -11  -3   25.86   13.47
   3 -11  -3   96.04   15.58
   3 -11  -3   83.05   18.41
   2 -11  -3  103.12   15.61
   2 -11  -3  135.29   21.00
   1 -11  -3   57.28   15.32
  -1  11   3   69.07   26.27
   1 -11  -3   63.91   11.10
   0 -11  -3  224.08   28.67
   0  11   3  249.23   33.81
   0 -11  -3  229.91   20.89
   1  11   3   21.54   21.17
  -1 -11  -3   48.72   14.24
  -2 -11  -3  107.69   24.41
   2  11   3  200.51   37.85
  -3 -11  -3  272.58   35.03
   3  11   3  264.75   35.77
   4  11   3  233.28   45.47
  -4 -11  -3  220.36   34.80
  -5 -11  -3   47.26   23.16
   5  11   3   61.80   35.23
  -6 -11  -3    0.36   20.78
   6  11   3   16.64   29.38
   7  11   3  161.60   46.73
   8  11   3  -63.76   32.30
   9  11   3  -54.91   39.29
   9 -12  -3  -25.72   17.21
   8 -12  -3   32.83   22.89
   7 -12  -3   31.13   20.65
   6 -12  -3   46.34   21.80
   5 -12  -3   15.41   15.00
   5 -12  -3   26.40   16.27
   4 -12  -3  370.23   38.79
   4 -12  -3  417.18   45.04
   3 -12  -3  288.25   30.54
   3 -12  -3  293.20   35.90
   2 -12  -3    6.25   11.64
   2 -12  -3   13.99    9.60
   1 -12  -3   -1.19    6.63
   1 -12  -3  -10.30    8.84
   0  12   3  168.00   35.57
   0 -12  -3  113.89   21.43
  -1 -12  -3  124.17   21.19
   1  12   3  119.53   30.84
   2  12   3   15.55   18.08
  -2 -12  -3    8.33   11.22
   3  12   3  178.51   37.54
  -3 -12  -3  153.73   28.47
   4  12   3   31.73   26.06
  -4 -12  -3   51.10   20.86
   5  12   3  -12.01   29.75
  -5 -12  -3   40.64   20.16
   6  12   3  -33.38   34.20
  -6 -12  -3  -11.65   17.65
   7  12   3   54.91   45.66
   8  12   3    1.26   47.29
   9 -13  -3   -0.58   22.98
   8 -13  -3   12.29   20.75
   7 -13  -3   -9.15   16.20
   6 -13  -3   90.62   24.60
   5 -13  -3   14.13   16.17
   5 -13  -3   -7.37   13.11
   4 -13  -3  282.34   32.55
   4 -13  -3  290.15   36.87
   3 -13  -3    2.76   13.05
   3 -13  -3   16.74   12.16
   2 -13  -3  557.09   47.14
   2 -13  -3  570.71   58.15
   1 -13  -3   15.85   12.98
   0 -13  -3  140.27   23.98
  -1 -13  -3   36.87   15.57
   1  13   3   19.82   25.32
   2  13   3  413.70   45.46
  -2 -13  -3  434.36   47.47
   3  13   3   -6.79   24.44
  -3 -13  -3   29.10   18.04
  -4 -13  -3  160.55   29.35
   4  13   3  180.03   43.99
  -5 -13  -3  -13.96   15.88
   6  13   3  160.07   53.42
  -6 -13  -3  168.64   35.18
   7  13   3   -6.01   40.53
   8  13   3   16.79   45.62
   8 -14  -3   45.80   25.14
   7 -14  -3   55.10   25.33
   6 -14  -3   56.81   22.33
   5 -14  -3   10.00   14.50
   4 -14  -3   59.82   18.79
   4 -14  -3   38.47   19.61
   3 -14  -3  388.39   45.54
   3 -14  -3  386.26   37.90
   2 -14  -3   34.46   17.36
   1 -14  -3   68.65   19.36
   0 -14  -3   24.01   15.53
  -1 -14  -3  340.08   41.08
   2  14   3   39.19   26.89
  -2 -14  -3   47.25   17.67
  -3 -14  -3   50.84   19.77
   3  14   3   49.91   32.51
  -4 -14  -3   -4.85   15.76
   4  14   3  -16.74   27.33
   5  14   3  -27.29   33.04
  -5 -14  -3   11.72   19.87
  -6 -14  -3   -3.79   17.17
   6  14   3  -60.47   37.06
   7  14   3   44.12   42.31
   8 -15  -3   -4.29   18.74
   7 -15  -3   26.06   21.50
   6 -15  -3    0.39   16.65
   5 -15  -3   51.71   21.44
   4 -15  -3   -2.03   11.85
   4 -15  -3  -12.95   13.14
   3 -15  -3   50.52   20.75
   3 -15  -3   72.61   18.61
   2 -15  -3    8.50   14.97
   1 -15  -3   -6.73   11.71
   0 -15  -3   27.25   16.26
  -1 -15  -3   10.71   15.26
  -2 -15  -3    1.93   15.94
  -3 -15  -3   21.56   18.67
   3  15   3   28.33   30.23
  -4 -15  -3   94.39   27.18
   4  15   3   75.04   37.01
   5  15   3  -21.86   29.71
  -5 -15  -3   20.76   21.42
  -6 -15  -3   -4.23   20.58
   6  15   3  -63.93   36.82
   7  15   3   11.01   43.53
   8  15   3  -89.29   45.35
   7 -16  -3    8.00   21.36
   6 -16  -3    0.77   15.71
   5 -16  -3  116.63   26.98
   4 -16  -3   96.14   27.23
   4 -16  -3  103.22   23.50
   3 -16  -3   66.23   22.74
   2 -16  -3   -1.09   14.95
   1 -16  -3  292.33   38.51
   0 -16  -3   17.94   16.58
  -1 -16  -3  205.09   31.24
  -2 -16  -3   14.59   16.13
  -3 -16  -3  193.99   32.76
   4  16   3  -20.63   26.18
  -4 -16  -3    2.21   17.72
   5  16   3  179.80   54.07
  -5 -16  -3  131.02   30.84
  -6 -16  -3   16.68   20.81
   7  16   3  -57.12   44.37
   7 -17  -3   20.04   20.77
   6 -17  -3   18.38   18.59
   4 -17  -3   31.11   21.08
   3 -17  -3    2.64   15.85
   2 -17  -3  126.71   27.08
   1 -17  -3   61.65   21.68
   0 -17  -3  169.87   30.06
  -1 -17  -3   22.29   17.45
  -2 -17  -3   73.72   22.79
  -3 -17  -3   14.25   17.58
  -4 -17  -3  110.38   29.08
   5  17   3  -46.38   35.04
  -5 -17  -3    5.03   21.10
   6  17   3   10.79   46.98
  -6 -17  -3   34.95   24.15
   7  17   3  -87.32   43.88
   4 -18  -3  -10.17   15.17
   3 -18  -3   -7.24   15.04
   2 -18  -3   54.39   24.35
   1 -18  -3    9.96   16.65
   0 -18  -3   10.77   18.10
  -1 -18  -3   15.43   16.53
  -2 -18  -3    5.62   18.70
  -3 -18  -3    8.28   18.54
  -4 -18  -3    2.97   19.05
  -5 -18  -3    3.17   21.19
  -6 -18  -3   58.32   27.36
   6  18   3   31.48   49.74
   4 -19  -3   46.28   25.81
   3 -19  -3   -3.40   19.14
   2 -19  -3   61.89   23.89
   1 -19  -3   48.92   22.50
   0 -19  -3  128.99   29.29
  -1 -19  -3    6.12   15.73
  -2 -19  -3   44.64   22.54
  -3 -19  -3    4.90   18.50
  -4 -19  -3   77.04   27.02
  -5 -19  -3   35.22   25.73
   4 -20  -3    4.57   20.54
   3 -20  -3   51.32   26.32
   2 -20  -3   -7.28   17.89
   1 -20  -3  144.45   32.80
   0 -20  -3    1.39   16.47
  -1 -20  -3  121.69   30.58
  -2 -20  -3    6.21   16.48
  -3 -20  -3   74.35   26.67
  -4 -20  -3    7.81   20.15
   2 -21  -3   -6.84   20.09
   1 -21  -3    9.80   21.61
   0 -21  -3   21.53   20.16
  -1 -21  -3    3.83   18.54
  -2 -21  -3   10.19   18.28
  -2 -21   4   72.11   26.42
  -1 -21   4   14.94   21.59
   0 -21   4   46.90   26.73
   1 -21   4   11.96   24.17
   2 -21   4   34.72   27.02
  -4 -20   4    6.42   17.36
  -3 -20   4   -0.10   17.44
  -2 -20   4    3.74   19.06
  -1 -20   4    4.21   19.41
   0 -20   4   30.00   24.12
   1 -20   4   15.40   22.93
   2 -20   4    8.30   22.52
   3 -20   4    3.86   21.09
   4 -20   4    8.44   21.75
  -5 -19   4   -0.22   15.41
  -4 -19   4   25.51   17.84
  -3 -19   4  -13.29   12.85
  -2 -19   4   12.71   18.21
  -1 -19   4    1.67   15.08
   0 -19   4  137.81   30.96
   1 -19   4    6.32   21.13
   2 -19   4   -8.16   16.73
   3 -19   4  -16.00   17.82
   4 -19   4   26.42   20.49
   5 -19   4   18.27   21.80
   5 -19   4   12.59   26.39
  -5 -18   4  152.62   28.30
  -4 -18   4    4.33   15.05
  -3 -18   4   47.93   20.51
  -2 -18   4    2.03   14.21
  -1 -18   4  238.75   36.03
   0 -18   4   10.44   15.50
   1 -18   4  156.20   30.72
   2 -18   4    5.63   18.51
   3 -18   4   -1.42   16.52
   4 -18   4   -1.51   17.82
   4 -18   4   -7.45   19.44
   5 -18   4   28.43   26.42
   5 -18   4   65.10   25.09
   6 -18   4  -14.27   24.26
  -5 -17   4    4.48   14.48
  -4 -17   4   64.60   21.48
  -3 -17   4    0.00   12.43
  -2 -17   4    1.79   13.79
  -1 -17   4   18.37   15.79
   0 -17   4  227.57   34.67
   1 -17   4  144.25   28.67
   2 -17   4   -5.32   16.67
   3 -17   4   48.18   22.97
   3 -17   4   32.09   22.30
   4 -17   4   10.51   18.87
   4 -17   4    9.07   20.80
   5 -17   4   56.94   31.69
   5 -17   4   43.95   23.07
   6 -17   4    0.18   23.17
   7  16  -4  -14.33   31.68
   6  16  -4    8.82   27.71
  -5 -16   4    4.49   14.94
  -4 -16   4   -4.00   10.98
  -3 -16   4   75.65   21.30
  -2 -16   4   11.67   14.32
  -1 -16   4    3.38   13.94
   0 -16   4   16.37   15.88
   1 -16   4   28.44   17.61
   2 -16   4  107.06   28.46
   2 -16   4  107.27   26.77
   3 -16   4   26.06   18.88
   3 -16   4   31.90   18.65
   4 -16   4   59.99   23.33
   4 -16   4   47.73   24.90
   5 -16   4    3.81   16.75
   5 -16   4  -16.76   17.97
   6 -16   4    8.83   25.62
   7 -16   4  -26.85   21.63
   8  15  -4   41.09   41.95
   7  15  -4    0.29   31.22
   6  15  -4   86.76   31.51
  -5 -15   4    0.18   13.11
   5  15  -4  -23.15   17.56
  -4 -15   4  151.74   25.16
  -3 -15   4   -5.68    9.88
  -2 -15   4  372.51   43.38
  -1 -15   4   98.48   22.95
   0 -15   4  266.85   35.60
   1 -15   4   -1.54   15.15
   1 -15   4   20.11   17.75
   2 -15   4  332.88   44.56
   2 -15   4  472.72   51.13
   3 -15   4   -2.56   17.30
   3 -15   4   -2.05   16.33
   4 -15   4   91.94   29.34
   4 -15   4  117.78   24.46
   5 -15   4    8.32   16.65
   5 -15   4   -1.69   20.59
   6 -15   4   24.49   26.76
   7 -15   4  -29.53   21.80
   8 -15   4  -40.31   23.84
   8  14  -4   85.49   39.44
   7  14  -4   30.97   28.26
   6  14  -4   -7.96   21.96
   5  14  -4  113.80   27.44
  -5 -14   4   82.72   22.16
   4  14  -4  105.35   24.50
  -4 -14   4   81.59   20.59
  -3 -14   4   73.83   17.11
  -2 -14   4   49.46   17.96
  -1 -14   4  230.40   31.93
   0 -14   4   13.11   15.72
   0 -14   4    3.79   14.76
   1 -14   4  293.90   39.54
   1 -14   4  416.20   44.71
   2 -14   4   30.84   19.27
   3 -14   4  164.10   36.08
   4 -14   4   -4.48   16.31
   5 -14   4   34.25   26.70
   6 -14   4  -20.78   17.66
   7 -14   4  -13.10   22.61
   8 -14   4    0.78   27.85
   9  13  -4  -46.26   36.67
   8  13  -4   -2.30   32.86
   7  13  -4  -11.68   25.53
   6  13  -4   11.72   23.00
  -5 -13   4   -6.57   10.94
   5  13  -4   -5.18   16.74
  -4 -13   4   16.66   13.13
   4  13  -4   35.07   17.71
  -3 -13   4    3.77   11.57
   3  13  -4    7.78   13.07
  -2 -13   4   61.54   17.32
  -1 -13   4  301.27   35.96
   0 -13   4    8.62   10.74
   0 -13   4    8.62   16.61
   1 -13   4   52.06   20.35
   2 -13   4    5.56   15.82
   3 -13   4  203.74   32.92
   4 -13   4    4.15   18.34
   5 -13   4   69.86   27.13
   6 -13   4  -26.00   16.38
   7 -13   4   63.18   31.61
   8 -13   4  -22.53   21.66
   9  12  -4  -42.63   36.03
   8  12  -4   31.47   35.13
   7  12  -4  185.34   31.59
   6  12  -4  -12.26   19.05
  -5 -12   4  133.98   23.37
   5  12  -4  117.74   20.83
  -4 -12   4   83.69   18.91
   4  12  -4  133.17   24.26
   3  12  -4  678.10   50.52
  -3 -12   4  612.89   61.73
  -2 -12   4    0.38    9.54
   2  12  -4   12.05    9.89
  -1 -12   4  228.19   32.37
  -1 -12   4  253.81   29.80
   0 -12   4    0.56   13.05
   1 -12   4  133.08   24.58
   2 -12   4   23.57   17.06
   3 -12   4  218.68   33.75
   4 -12   4   26.79   22.69
   5 -12   4   20.32   19.71
   6 -12   4  -24.63   16.78
   7 -12   4   32.59   26.33
   8 -12   4  -28.62   21.84
   9 -12   4  -40.40   24.78
   9  11  -4  -33.10   33.82
   8  11  -4   90.07   34.58
   7  11  -4   -3.22   22.03
   6  11  -4  208.43   29.20
   5  11  -4   12.84   17.08
  -5 -11   4   11.03   12.51
   4  11  -4  272.29   27.56
  -4 -11   4  238.52   29.72
   3  11  -4   13.89   10.92
  -3 -11   4    2.94    9.13
   2  11  -4 1026.48   70.14
  -2 -11   4 1056.01   90.15
  -2 -11   4  901.24   87.50
  -1 -11   4   10.72   11.35
  -1 -11   4   24.64   17.07
   1  11  -4   38.70   10.03
   0 -11   4  123.37   28.97
   1 -11   4    4.71   13.64
   2 -11   4  641.93   63.28
   3 -11   4   -4.41   13.23
   4 -11   4  115.76   30.48
   5 -11   4   31.53   23.19
   6 -11   4   14.05   20.33
   7 -11   4   11.01   23.17
   8 -11   4  -13.46   20.69
   9 -11   4  -24.77   25.14
  10  10  -4  -60.30   29.89
   8  10  -4   51.91   33.49
   7  10  -4   37.54   23.52
   6  10  -4    5.11   18.64
  -5 -10   4    3.73   11.38
   5  10  -4   16.22   16.63
  -4 -10   4   17.02   10.73
   4  10  -4    6.64   12.70
  -3 -10   4  203.26   25.36
  -2 -10   4   50.02   27.50
  -2 -10   4   77.41   14.69
   2  10  -4   83.55   11.89
   1  10  -4   14.07    7.97
  -1 -10   4   11.48   20.07
   0  10  -4  108.71   11.39
   0 -10   4  132.68   29.86
   1 -10   4   15.52   14.24
   2 -10   4  141.46   25.68
   3 -10   4   51.59   21.67
   4 -10   4  362.41   44.85
   5 -10   4   53.97   24.03
   6 -10   4  206.69   36.01
   7 -10   4   12.52   22.99
   8 -10   4   44.32   31.85
   9 -10   4  -31.85   24.23
   9   9  -4   23.65   31.64
   8   9  -4   13.14   28.82
   7   9  -4   -6.24   20.24
   6   9  -4  201.45   26.88
  -5  -9   4   -0.16    9.50
   5   9  -4    9.98   12.82
  -4  -9   4  204.35   24.98
   4   9  -4  194.17   21.52
   3   9  -4   76.09   14.57
  -3  -9   4   37.79   10.74
  -2  -9   4  205.51   46.07
  -2  -9   4  285.49   28.51
   2   9  -4  265.95   22.40
   1   9  -4  118.92   12.46
  -1  -9   4  110.89   31.21
   0   9  -4  819.26   53.12
   0  -9   4  756.76   73.87
   1  -9   4   26.77   15.48
   2  -9   4   66.79   20.55
   3  -9   4  276.87   36.34
   4  -9   4  258.71   36.13
   5  -9   4   94.52   28.22
   6  -9   4    0.94   16.12
   7  -9   4   14.40   22.40
   8  -9   4  -16.83   23.06
   9  -9   4  -23.99   23.89
  10   8  -4   -9.14   33.52
   9   8  -4  177.16   44.21
   8   8  -4  -33.70   20.38
   7   8  -4  235.94   30.07
   6   8  -4   53.45   18.78
   5   8  -4  783.81   63.72
  -5  -8   4  901.90   78.53
  -4  -8   4  168.82   22.06
   4   8  -4  181.19   20.48
  -3  -8   4  749.10   65.91
   3   8  -4  709.81   52.86
   2   8  -4   -5.04    6.02
  -1  -8   4  835.01   86.63
   0  -8   4  334.48   42.66
   1  -8   4  956.32   84.19
   2  -8   4  152.59   25.29
   3  -8   4  298.23   37.12
   4  -8   4   -6.36   11.04
   5  -8   4  185.02   31.34
   6  -8   4  119.48   31.59
   7  -8   4   -9.38   17.85
   8  -8   4  -23.39   17.49
   9  -8   4  -35.70   19.72
  10  -8   4  -45.13   24.52
  11   7  -4   25.77   39.03
  10   7  -4  -38.20   31.40
   9   7  -4   48.12   29.37
   8   7  -4  108.51   31.13
   7   7  -4  238.37   30.77
   6   7  -4  143.59   25.48
  -5  -7   4  284.41   30.59
   5   7  -4  231.98   25.58
  -4  -7   4  120.14   18.31
   4   7  -4  123.76   17.10
   3   7  -4    2.38    6.75
  -3  -7   4   -4.50    5.38
   2   7  -4   -0.91    5.24
  -1  -7   4  297.24   50.64
   0   7  -4  275.43   19.30
   0  -7   4  243.97   39.03
   1  -7   4  450.69   47.46
   2  -7   4  410.18   44.17
   3  -7   4    2.56   11.15
   4  -7   4   23.23   16.81
   5  -7   4  131.02   29.60
   6  -7   4    7.02   16.47
   7  -7   4   87.64   32.08
   8  -7   4  -24.93   18.70
   9  -7   4  -13.43   23.73
  10   6  -4    0.61   33.08
   9   6  -4  -26.01   21.79
   8   6  -4  -13.15   20.91
   7   6  -4  113.39   27.37
   6   6  -4  153.30   21.03
   5   6  -4  366.07   33.46
  -5  -6   4  367.98   38.06
   4   6  -4  231.86   23.24
  -4  -6   4  242.31   25.40
  -3  -6   4  106.53   13.04
   3   6  -4   75.84   12.62
   2   6  -4   48.99    8.73
   1   6  -4 2567.56  167.15
   0   6  -4  175.12   13.00
   0  -6   4  155.86   35.50
   1  -6   4  125.15   23.33
   2  -6   4  732.64   65.99
   3  -6   4  133.45   23.18
   4  -6   4  158.25   26.51
   5  -6   4  131.67   28.81
   6  -6   4  374.76   46.54
   7  -6   4   10.05   20.48
   8  -6   4   52.76   31.83
   9  -6   4  -29.54   23.37
  10  -6   4  -39.40   26.22
  11   5  -4  -59.29   31.19
  10   5  -4  -21.20   30.61
   9   5  -4    4.13   23.18
   8   5  -4   67.85   25.24
   7   5  -4  102.76   24.42
   7   5  -4   59.66   19.49
   6   5  -4  358.43   34.09
   6   5  -4  375.12   38.01
   5   5  -4   -2.00    9.34
  -5  -5   4    3.59    7.50
   4   5  -4 1750.45  118.75
   3   5  -4   -7.22    5.79
   2   5  -4  782.87   54.13
   1   5  -4  272.39   20.47
   0  -5   4 3020.91  239.30
   0   5  -4 3293.08  203.92
   1  -5   4  119.19   21.22
   2  -5   4  108.48   19.05
   3  -5   4  112.73   20.56
   3  -5   4  108.74   10.11
   4  -5   4  389.12   27.12
   4  -5   4  332.29   39.86
   5  -5   4    3.59   13.78
   5  -5   4   -4.22    6.84
   6  -5   4  187.74   31.93
   7  -5   4  -12.99   16.84
   8  -5   4  -11.28   19.82
  10  -5   4  -41.09   28.09
  11   4  -4  -57.48   28.75
  10   4  -4   12.10   33.65
   9   4  -4   70.52   29.07
   8   4  -4   55.98   24.13
   8   4  -4   62.43   24.04
   7   4  -4   37.79   18.14
   7   4  -4   76.40   21.05
   6   4  -4   96.34   20.60
   6   4  -4   71.54   20.11
   5   4  -4 1130.76   86.62
   5   4  -4 1035.79   77.49
  -4  -4   4  145.45   18.26
   4   4  -4  182.82   23.61
   3   4  -4  361.59   28.44
   2   4  -4  111.32   11.00
   1   4  -4  901.80   60.24
   0  -4   4   10.05   16.76
   1  -4   4  317.96   35.79
   2  -4   4  117.78   20.20
   2  -4   4  144.50   13.06
   3  -4   4  131.58   12.33
   3  -4   4  105.71   18.90
   4  -4   4  211.32   29.95
   4  -4   4  236.78   20.00
   5  -4   4  206.62   30.23
   5  -4   4  203.46   19.73
   6  -4   4  110.06   28.57
   6  -4   4   93.64   17.33
   7  -4   4   -7.81   15.89
   8  -4   4   63.92   29.44
   9  -4   4  -12.74   21.76
  10  -4   4  -17.80   27.32
  11  -4   4  -43.63   27.88
  11   3  -4  -38.09   36.01
  10   3  -4  -33.83   24.24
   9   3  -4   44.24   28.20
   9   3  -4   48.93   26.89
   8   3  -4  154.41   34.44
   8   3  -4  171.28   33.01
   7   3  -4  164.27   23.16
   7   3  -4  157.14   31.63
   6   3  -4    7.67   12.61
   6   3  -4   -4.07   11.69
   5   3  -4  349.57   31.49
   5   3  -4  382.58   37.55
   4   3  -4   33.62   12.51
   4   3  -4   24.18   10.28
   3   3  -4  306.90   24.71
   2   3  -4  534.60   37.75
   1   3  -4  126.49   10.85
   0  -3   4   31.17    5.24
   1  -3   4    8.83    7.86
   1  -3   4    5.87    9.35
   2  -3   4  411.81   43.47
   2  -3   4  548.77   37.23
   3  -3   4  216.65   28.79
   3  -3   4  285.49   22.32
   4  -3   4  125.23   25.52
   4  -3   4  113.25   14.36
   5  -3   4  503.96   38.90
   5  -3   4  461.77   49.28
   6  -3   4   14.78   12.54
   6  -3   4   -5.60   13.84
   7  -3   4  263.52   38.59
   7  -3   4  270.66   28.74
   8  -3   4  -11.63   20.42
   9  -3   4   17.17   25.89
  10  -3   4  -40.35   22.86
  11  -3   4   23.25   34.69
  11   2  -4  -38.33   30.24
  10   2  -4  -44.85   25.23
  10   2  -4   -8.67   24.01
   9   2  -4   43.93   26.39
   9   2  -4   48.58   28.04
   8   2  -4   38.40   22.30
   8   2  -4    3.04   20.79
   7   2  -4  741.23   68.01
   7   2  -4  735.80   59.11
   6   2  -4  106.12   20.21
   6   2  -4   85.10   23.03
   5   2  -4  421.63   36.93
   5   2  -4  500.23   43.93
   4   2  -4  293.22   25.38
  -4  -2   4  290.00   26.60
   4   2  -4  291.70   29.47
   3   2  -4 2493.01  171.82
   3   2  -4 2279.63  157.03
   2   2  -4    2.67    4.59
   1   2  -4  490.46   33.62
   0  -2   4   15.14    5.38
   1  -2   4  210.07   25.02
   1  -2   4  234.50   21.73
   2  -2   4  123.87   18.39
   2  -2   4  117.58   15.19
   3  -2   4 1620.87  104.77
   3  -2   4 1427.95  116.70
   4  -2   4    1.40   11.02
   4  -2   4   12.49    9.78
   5  -2   4  114.09   24.62
   5  -2   4  117.30   17.05
   6  -2   4  139.16   25.33
   6  -2   4  151.49   20.90
   7  -2   4  136.38   21.75
   7  -2   4  104.99   29.09
   8  -2   4    3.46   19.14
   8  -2   4   -1.48   18.79
   9  -2   4  -27.91   24.01
  10  -2   4  -23.47   25.76
  10   1  -4    3.62   28.92
  10   1  -4   15.42   28.97
   9   1  -4   23.27   24.72
   9   1  -4   47.30   27.26
   8   1  -4  330.34   43.63
   8   1  -4  371.55   37.73
   7   1  -4   24.93   17.45
   7   1  -4   -0.94   16.87
   6   1  -4  547.13   46.03
   6   1  -4  584.16   53.71
   5   1  -4   18.95   12.32
   5   1  -4   19.34   12.17
   4   1  -4 1630.46  124.04
   4   1  -4 1735.04  113.96
   3   1  -4  131.89   16.46
   3   1  -4  114.17   12.72
   2   1  -4  884.14   62.87
   2   1  -4  984.26   70.89
   1   1  -4  786.01   52.45
   0  -1   4  109.15   11.44
   1  -1   4   19.60    9.70
   1  -1   4   28.18   11.36
   2  -1   4  372.45   37.14
   2  -1   4  424.04   34.36
   3  -1   4 1300.77   95.59
   3  -1   4 1114.31   85.23
   4  -1   4  359.01   38.87
   4  -1   4  410.39   34.47
   5  -1   4  237.34   29.86
   5  -1   4  182.53   23.63
   6  -1   4  165.75   28.39
   6  -1   4  217.57   25.27
   7  -1   4  161.44   25.51
   7  -1   4  162.52   34.20
   8  -1   4   -1.82   20.87
   8  -1   4   -0.45   18.75
   9  -1   4   29.43   27.69
   9  -1   4   80.57   34.78
  11   0  -4  -27.20   27.65
  10   0  -4   44.55   28.05
  10   0  -4   -6.81   26.23
   9   0  -4    5.79   20.66
   9   0  -4  -15.99   20.27
   8   0  -4  483.47   44.62
   8   0  -4  487.69   54.06
   7   0  -4   -7.17   14.20
   7   0  -4    9.10   13.24
   6   0  -4   86.97   22.76
   6   0  -4   94.27   17.17
   5   0  -4   -9.00    7.53
   5   0  -4   -5.41    9.53
   4   0  -4  368.38   33.03
   4   0  -4  289.78   27.09
   3   0  -4    0.34    5.52
   3   0  -4   -3.52    5.50
   2   0  -4  290.09   24.89
   2   0  -4  278.98   21.47
  -1   0   4   -2.54    3.99
   0   0   4  780.16   56.15
   1   0   4    1.02    6.40
   1   0   4    9.30    9.80
   2   0   4 3057.49  195.73
   2   0   4 2743.17  207.54
   3   0   4    8.70    9.92
   3   0   4   17.14   12.40
   4   0   4  588.77   49.08
   4   0   4  639.64   54.29
   5   0   4  -13.13   11.86
   5   0   4   11.54   11.41
   6   0   4   24.68   14.42
   7   0   4    5.69   15.25
   7   0   4    8.84   14.77
   8   0   4  206.49   35.11
   8   0   4  199.14   30.97
   9   0   4   -9.37   23.50
   9   0   4  -24.86   20.18
  10   0   4   -9.20   36.17
  11  -1  -4   -5.11   24.43
  10  -1  -4   37.93   31.37
  10  -1  -4   17.03   24.47
   9  -1  -4   45.13   25.42
   9  -1  -4   32.26   24.39
   8  -1  -4  283.88   31.67
   8  -1  -4  289.72   39.55
   7  -1  -4    9.77   16.56
   7  -1  -4   27.67   15.25
   6  -1  -4  504.13   42.10
   6  -1  -4  524.16   50.18
   5  -1  -4   15.35   10.25
   5  -1  -4    3.17   10.54
   4  -1  -4 1607.41  123.58
   4  -1  -4 1746.79  113.55
   3  -1  -4  115.79   11.88
   3  -1  -4   89.76   13.92
   2  -1  -4  763.85   54.66
   2  -1  -4  852.53   60.50
   1  -1  -4 1004.51   75.03
  -1   1   4 1063.28   70.43
   0   1   4  120.68   15.67
   1   1   4   45.57   15.28
   2   1   4  518.16   45.54
   2   1   4  580.92   46.67
   3   1   4 1365.75  100.13
   3   1   4 1414.53  104.61
   4   1   4  369.05   35.92
   4   1   4  411.11   37.88
   5   1   4  180.04   24.69
   5   1   4  190.44   25.53
   6   1   4  171.78   24.65
   6   1   4  149.73   23.92
   7   1   4  165.91   26.70
   7   1   4  163.06   27.42
   8   1   4   13.24   21.32
   8   1   4   23.59   21.68
   9   1   4   80.54   36.67
  11  -2  -4  -18.19   25.25
  10  -2  -4  -11.15   23.74
  10  -2  -4  -18.78   20.18
   9  -2  -4   59.79   24.27
   9  -2  -4   57.78   26.98
   8  -2  -4    8.35   14.43
   8  -2  -4   -1.06   18.92
   7  -2  -4  672.87   64.81
   7  -2  -4  732.33   56.32
   6  -2  -4   80.48   18.08
   6  -2  -4   76.60   21.12
   5  -2  -4  436.27   42.00
   5  -2  -4  438.88   36.41
   2  -2  -4   -2.04    5.49
   2  -2  -4    2.35    4.45
  -2   2   4   -9.03    5.60
   1  -2  -4  493.14   52.08
  -1   2   4  592.60   41.55
   1  -2  -4  591.05   42.19
   0   2   4   18.93   13.51
   0  -2  -4   -0.84    6.63
   1   2   4  255.72   27.88
  -1  -2  -4  222.91   27.63
   2   2   4  136.58   16.55
   2   2   4  157.27   21.08
   3   2   4 1816.65  127.68
   3   2   4 1778.24  130.53
   4   2   4   16.58   13.62
   4   2   4    5.07    9.64
   5   2   4  115.21   22.08
   5   2   4  153.13   27.83
   6   2   4  219.52   29.18
   6   2   4  255.13   31.60
   7   2   4  162.01   27.84
   7   2   4  194.43   29.61
   8   2   4  -13.06   25.43
   9   2   4  -41.20   29.41
  10   2   4  -63.75   34.51
  11  -3  -4   37.59   32.93
  10  -3  -4  -24.87   21.34
   9  -3  -4   42.27   20.84
   9  -3  -4   34.18   24.20
   8  -3  -4  128.25   31.79
   8  -3  -4  119.64   20.67
   7  -3  -4  118.89   20.03
   7  -3  -4  157.34   27.66
   6  -3  -4   41.30   16.37
   6  -3  -4   67.06   17.45
   5  -3  -4  294.33   32.42
   5  -3  -4  307.54   27.85
   4  -3  -4   54.78   12.14
   4  -3  -4   33.10   12.64
   3  -3  -4  371.55   31.04
   3  -3  -4  340.80   34.59
  -3   3   4  321.11   27.23
  -2   3   4  524.88   42.19
   2  -3  -4  636.55   54.94
   2  -3  -4  591.39   45.14
   1  -3  -4  156.39   15.14
   1  -3  -4  157.70   21.96
  -1   3   4  192.67   19.22
   0  -3  -4   15.84    9.25
   0  -3  -4   23.94    5.16
   0   3   4   18.88   18.65
  -1  -3  -4   -2.12    7.05
   1   3   4   19.13   15.70
   2   3   4  745.45   61.08
   2   3   4  748.86   56.23
  -2  -3  -4  735.05   72.61
   3   3   4  257.22   23.20
   3   3   4  240.85   29.60
   4   3   4  133.74   17.67
   4   3   4  125.85   21.64
   5   3   4  543.01   49.82
   6   3   4   11.63   14.52
   6   3   4   16.99   17.88
   7   3   4  314.80   38.93
   8   3   4  -15.30   21.46
   9   3   4   38.85   36.58
  11   3   4  -75.57   39.16
  11  -4  -4    4.78   27.78
  10  -4  -4   64.98   31.03
   9  -4  -4   46.35   26.31
   8  -4  -4   70.22   20.28
   8  -4  -4   78.58   27.03
   7  -4  -4   46.83   20.26
   7  -4  -4   41.20   17.57
   6  -4  -4   78.14   20.31
   6  -4  -4  106.84   19.88
   5  -4  -4 1021.12   73.23
   5  -4  -4 1019.24   81.45
   4  -4  -4  166.61   20.74
   4  -4  -4  154.10   20.30
   3  -4  -4  433.07   40.73
  -3   4   4  441.57   33.30
   3  -4  -4  385.83   35.56
  -2   4   4  122.85   15.35
   2  -4  -4  151.51   18.56
   2  -4  -4  145.25   14.97
  -1   4   4 1027.75   77.05
   1  -4  -4 1087.56   91.54
   1  -4  -4  981.26   74.21
   0  -4  -4   32.74    5.58
   0   4   4    4.71   17.72
   0  -4  -4   31.45   11.56
   1   4   4  409.42   42.36
  -1  -4  -4  446.37   44.69
   2   4   4  134.54   22.71
  -3  -4  -4  151.70   29.28
   3   4   4  148.00   14.60
   3   4   4  133.29   29.33
   4   4   4  292.06   33.91
   4   4   4  282.46   26.63
   5   4   4  227.57   30.85
   5   4   4  271.45   27.30
   6   4   4  111.21   29.63
   6   4   4  115.43   20.57
   7   4   4   19.93   23.44
   8   4   4  137.46   39.52
   9   4   4  -53.38   31.04
  10   4   4    5.81   43.18
  11  -5  -4  -33.62   21.59
  10  -5  -4   15.48   24.59
   9  -5  -4   -9.78   15.90
   8  -5  -4   48.29   21.84
   7  -5  -4   76.56   18.98
   7  -5  -4   86.66   23.98
   6  -5  -4  319.32   30.67
   6  -5  -4  352.02   37.24
   5  -5  -4    3.11    9.02
   4  -5  -4 1943.10  160.54
  -4   5   4 1836.88  127.66
   3  -5  -4    6.52    6.96
   3  -5  -4    1.17    6.14
  -3   5   4   21.94   10.50
   2  -5  -4  873.78   75.78
  -2   5   4  842.39   63.12
   2  -5  -4  828.90   63.54
  -1   5   4  276.01   31.56
   1  -5  -4  233.12   21.05
   1  -5  -4  245.49   28.13
   0  -5  -4 4312.16  354.01
   0  -5  -4 4164.86  292.80
   1   5   4  121.75   31.85
  -1  -5  -4  124.51   19.26
   2   5   4  143.01   30.16
  -2  -5  -4  116.73   21.23
   3   5   4  122.71   28.51
   4   5   4  409.81   43.77
  -4  -5  -4  454.04   54.78
   5   5   4    1.78   10.01
   5   5   4  -18.50   16.81
   6   5   4  217.44   33.22
   7   5   4  -16.39   20.87
   8   5   4  -29.33   22.44
  11  -6  -4  -13.06   24.10
  10  -6  -4   24.56   25.83
   9  -6  -4    2.10   20.14
   8  -6  -4    2.92   16.44
   7  -6  -4   87.33   23.66
   6  -6  -4  123.69   21.45
  -6   6   4  123.88   18.55
   5  -6  -4  337.40   35.01
  -5   6   4  333.73   30.76
  -4   6   4  222.70   22.58
   4  -6  -4  231.35   25.50
   4  -6  -4  194.54   23.03
  -3   6   4  133.70   18.19
   3  -6  -4  121.76   16.64
   3  -6  -4  146.28   18.12
   2  -6  -4   46.25    9.79
  -2   6   4   45.70   18.43
   2  -6  -4   34.37   10.14
  -1   6   4 2685.10  188.92
   1  -6  -4 2576.67  186.94
   1  -6  -4 2759.46  225.55
   0  -6  -4  236.46   26.14
   0  -6  -4  232.38   17.84
   0   6   4  172.37   29.73
  -1  -6  -4   89.71   16.80
   1   6   4  100.15   28.08
   2   6   4  816.65   71.77
  -2  -6  -4  876.99   80.25
   3   6   4  177.52   27.81
  -3  -6  -4  178.70   29.19
  -4  -6  -4  127.68   29.42
   4   6   4  184.08   27.34
   5   6   4  234.79   41.63
  -5  -6  -4  147.61   36.36
   6   6   4  356.51   42.19
   7   6   4    5.32   29.25
   8   6   4   78.40   40.92
   9   6   4  -38.07   28.00
  10   6   4  -53.91   41.23
  10  -7  -4   16.08   24.63
   9  -7  -4   21.02   22.73
   8  -7  -4  107.54   28.68
   7  -7  -4  220.04   31.09
   6  -7  -4  109.21   23.69
  -6   7   4  145.47   19.19
   5  -7  -4  230.62   28.53
  -5   7   4  275.91   27.20
   4  -7  -4  113.43   18.43
  -4   7   4  157.21   19.72
   4  -7  -4  112.78   18.63
  -3   7   4    6.38   12.79
   3  -7  -4    2.23    6.30
   3  -7  -4   10.10    7.53
  -2   7   4    2.06   14.98
   2  -7  -4   -4.13    6.14
   2  -7  -4   -1.58    5.21
   1  -7  -4  439.18   33.45
  -1   7   4  385.84   46.53
   1  -7  -4  428.61   41.72
   0   7   4  252.81   35.63
   0  -7  -4  269.91   30.75
   0  -7  -4  265.14   21.32
   1   7   4  380.38   41.79
   2   7   4  360.25   42.58
  -2  -7  -4  386.72   41.44
  -3  -7  -4    9.78   12.11
   3   7   4  -16.71   16.15
   4   7   4   17.15   19.44
  -4  -7  -4   23.01   18.03
   5   7   4  169.08   40.12
  -5  -7  -4  118.62   29.75
  -6  -7  -4   18.73   23.59
   6   7   4    5.92   20.41
   7   7   4  112.05   42.57
   8   7   4  -35.70   28.00
   9   7   4  -33.41   32.06
  10  -8  -4   -6.16   21.48
   9  -8  -4  149.06   37.40
   8  -8  -4   -9.79   15.45
   7  -8  -4  220.40   31.35
   6  -8  -4   37.41   15.72
  -5   8   4  786.54   59.56
   5  -8  -4  747.25   64.74
   4  -8  -4  193.45   23.39
   4  -8  -4  161.55   21.68
  -4   8   4  175.09   23.96
   3  -8  -4  764.41   72.20
   3  -8  -4  778.97   62.30
  -3   8   4  830.25   66.65
   2  -8  -4   -4.69    6.18
  -2   8   4   -8.46   20.90
   2  -8  -4   -7.31    4.77
   1  -8  -4  994.19   71.33
  -1   8   4  896.16   81.40
   1  -8  -4 1020.40   87.45
   0  -8  -4  388.77   41.18
   0  -8  -4  392.95   30.54
   0   8   4  409.77   44.66
  -1  -8  -4 1086.75   71.58
  -1  -8  -4 1091.58   92.63
   1   8   4  860.33   80.84
  -2  -8  -4  178.94   26.98
   2   8   4  188.76   31.84
   3   8   4  339.49   40.96
  -3  -8  -4  364.03   41.82
   4   8   4  -12.04   17.25
  -4  -8  -4   -7.57   12.05
  -5  -8  -4  207.92   35.80
   5   8   4  204.36   33.18
   6   8   4  206.49   44.77
  -6  -8  -4  119.25   35.81
   7   8   4  -40.26   28.28
   8   8   4  -56.73   26.23
  10   8   4  -82.13   39.08
  10  -9  -4    0.08   18.95
   9  -9  -4   32.98   24.25
   8  -9  -4   47.39   22.57
   7  -9  -4    0.70   14.71
   6  -9  -4  143.64   23.79
   5  -9  -4    6.69   11.47
   4  -9  -4  198.86   24.09
   4  -9  -4  195.85   25.74
  -4   9   4  193.84   28.93
   3  -9  -4   61.66   13.79
   3  -9  -4   40.01   13.21
  -3   9   4   80.58   29.47
   2  -9  -4  281.22   31.84
   2  -9  -4  284.06   26.32
  -2   9   4  278.23   43.05
   1  -9  -4  127.18   19.90
   1  -9  -4  126.42   14.24
  -1   9   4  127.26   34.41
   0  -9  -4  871.23   80.92
   0   9   4  851.94   75.26
   0  -9  -4  908.53   63.78
   1   9   4  -10.82   18.93
  -1  -9  -4    2.09    8.59
  -1  -9  -4   -3.80    3.05
   2   9   4   45.65   27.17
  -2  -9  -4   58.58   17.46
   3   9   4  313.03   41.13
  -3  -9  -4  345.34   40.14
  -4  -9  -4  290.13   39.26
   4   9   4  274.62   37.36
   5   9   4  104.50   37.52
  -5  -9  -4   70.93   25.32
   6   9   4    6.38   26.48
  -6  -9  -4    3.30   20.41
   7   9   4  -16.82   34.26
   8   9   4  -59.91   28.11
   9   9   4  -74.18   39.21
  10 -10  -4   -9.12   22.62
   9 -10  -4   -6.56   18.03
   8 -10  -4   54.27   24.17
   7 -10  -4   27.45   17.90
   6 -10  -4   23.79   16.31
   5 -10  -4   11.49   12.93
   4 -10  -4   14.37   11.55
   4 -10  -4   22.79   11.80
  -3  10   4  276.76   41.84
   3 -10  -4  241.71   26.72
   3 -10  -4  233.15   30.65
   2 -10  -4   83.62   14.22
   2 -10  -4   82.93   16.94
  -2  10   4  150.19   38.80
   1 -10  -4    5.46    9.98
   1 -10  -4   13.52    8.19
  -1  10   4  -17.60   26.58
   0 -10  -4  124.69   12.75
   0  10   4  106.49   36.52
   0 -10  -4  129.52   20.00
   1  10   4   24.08   26.25
  -1 -10  -4   18.75   11.18
  -2 -10  -4  183.40   28.25
   2  10   4  199.28   32.85
  -3 -10  -4   69.57   21.37
  -4 -10  -4  469.58   53.05
   4  10   4  424.79   49.12
  -5 -10  -4   68.51   26.08
   5  10   4   69.25   33.01
  -6 -10  -4  190.70   37.94
   6  10   4  218.17   38.57
   7  10   4  -12.21   33.25
   8  10   4   83.32   43.74
   9  10   4  -76.96   40.80
   9 -11  -4    0.93   20.60
   8 -11  -4   84.95   26.91
   7 -11  -4    0.62   16.00
   6 -11  -4  201.93   29.06
   5 -11  -4    3.06   12.26
   4 -11  -4  302.55   35.22
   4 -11  -4  272.70   31.00
   3 -11  -4   12.34   10.35
   3 -11  -4    1.00    8.74
  -2  11   4 1274.85   96.81
   2 -11  -4  985.49   81.64
   2 -11  -4 1022.03   98.77
  -1  11   4   21.19   28.88
   1 -11  -4   30.64    9.09
   1 -11  -4   44.59   14.03
   0  11   4  110.88   35.50
   0 -11  -4  170.13   23.98
   1  11   4   -2.21   23.57
  -1 -11  -4    6.75   10.13
  -2 -11  -4  779.95   73.82
   2  11   4  704.70   68.04
   3  11   4  -20.07   24.45
  -3 -11  -4   23.96   15.15
   4  11   4  172.10   41.97
  -4 -11  -4  127.28   27.70
   5  11   4   31.71   31.93
  -5 -11  -4   40.86   22.94
  -6 -11  -4   36.89   24.87
   6  11   4  -10.20   33.04
   7  11   4  -23.06   38.37
   8  11   4  -25.08   40.56
   9 -12  -4   16.71   23.19
   8 -12  -4   49.93   24.30
   7 -12  -4  146.39   27.00
   6 -12  -4   11.02   16.17
   5 -12  -4  106.98   20.26
   4 -12  -4  105.48   22.03
   4 -12  -4   71.58   20.79
   3 -12  -4  649.04   65.85
   3 -12  -4  680.37   55.68
   2 -12  -4    9.52   10.68
   2 -12  -4   12.46    8.67
   1 -12  -4  258.06   32.18
  -1  12   4  278.28   41.39
   1 -12  -4  242.74   23.74
   0  12   4  -33.07   23.01
   0 -12  -4   -4.21   10.09
  -1 -12  -4  181.34   25.69
   1  12   4  118.09   38.29
   2  12   4   -3.41   25.38
  -2 -12  -4   19.46   13.12
  -3 -12  -4  322.46   40.91
   3  12   4  278.37   41.53
   4  12   4   19.20   32.76
  -4 -12  -4   47.51   19.48
  -5 -12  -4   42.38   23.82
   5  12   4   17.39   33.71
   6  12   4  -58.68   32.74
  -6 -12  -4  -10.76   16.95
   7  12   4   36.21   43.82
   8  12   4  -58.87   34.20
   9 -13  -4   10.89   23.05
   8 -13  -4    4.63   18.17
   7 -13  -4   15.22   18.44
   6 -13  -4    4.88   14.61
   5 -13  -4   -8.51   10.58
   4 -13  -4   25.72   14.21
   4 -13  -4    7.22   14.38
   3 -13  -4    5.37   12.31
   3 -13  -4   12.28   10.46
   2 -13  -4  119.14   18.26
   2 -13  -4  152.55   25.80
   1 -13  -4  311.13   37.16
   0 -13  -4   16.84   13.65
   0  13   4   29.83   25.22
   1  13   4   74.61   32.40
  -2 -13  -4   13.28   13.19
   2  13   4   -8.72   21.50
   3  13   4  263.67   39.78
  -3 -13  -4  252.46   36.13
  -4 -13  -4   -9.75   16.90
   4  13   4  -35.31   24.78
  -5 -13  -4   91.15   29.34
   5  13   4   69.40   43.96
  -6 -13  -4   -9.64   17.87
   7  13   4   39.46   49.85
   9  13   4  -94.78   49.78
   8 -14  -4   65.47   28.49
   7 -14  -4   33.09   20.98
   6 -14  -4    0.83   13.91
   5 -14  -4   94.79   23.52
   4 -14  -4   73.81   19.58
   4 -14  -4   57.70   21.54
   3 -14  -4   96.22   24.20
   3 -14  -4  108.79   21.14
   2 -14  -4   63.58   20.07
   1 -14  -4  192.66   28.96
   0 -14  -4   -7.08   12.40
  -1 -14  -4  335.92   42.58
   1  14   4  352.74   45.75
   2  14   4   45.29   31.56
  -2 -14  -4   39.90   18.24
  -3 -14  -4  182.35   32.90
   3  14   4  228.74   47.90
  -4 -14  -4   16.40   18.09
   4  14   4  -23.66   30.50
   5  14   4   25.42   42.61
  -5 -14  -4   65.94   27.60
  -6 -14  -4   14.63   22.25
   8  14   4  -48.93   53.64
   8 -15  -4   85.98   30.17
   7 -15  -4    1.28   18.56
   6 -15  -4   99.52   25.61
   5 -15  -4  -13.90   11.00
   4 -15  -4  142.28   21.77
   4 -15  -4  150.45   28.08
   3 -15  -4   -7.67   12.77
   2 -15  -4  353.03   42.95
   1 -15  -4  115.16   24.92
   0 -15  -4  250.91   35.69
  -1 -15  -4    5.14   13.44
  -2 -15  -4  408.57   49.29
   2  15   4  434.11   51.95
   3  15   4    2.88   27.76
  -3 -15  -4    5.78   17.36
   4  15   4  121.51   45.99
  -4 -15  -4  118.05   30.86
  -5 -15  -4   15.17   19.48
   5  15   4  -23.76   37.21
   6  15   4   -3.30   41.54
  -6 -15  -4   53.69   29.19
   8  15   4 -104.07   48.37
   7 -16  -4   17.73   19.79
   6 -16  -4   28.77   20.01
   5 -16  -4   -2.83   13.94
   4 -16  -4  -16.97   13.08
   3 -16  -4   72.75   23.29
   2 -16  -4    1.80   13.93
   1 -16  -4    2.29   14.17
   0 -16  -4   16.33   16.05
  -1 -16  -4   14.72   16.28
  -2 -16  -4  103.29   23.59
  -3 -16  -4   35.62   20.82
   3  16   4   51.02   35.72
  -4 -16  -4   69.25   26.98
   4  16   4   98.33   41.94
   5  16   4  -69.23   36.26
  -5 -16  -4  -12.39   17.27
   6  16   4   54.82   53.70
  -6 -16  -4  110.13   34.43
   7  16   4  -70.42   40.08
   6 -17  -4   47.06   21.53
   4 -17  -4   49.90   22.77
   3 -17  -4  -14.55   14.53
   2 -17  -4   -0.39   13.84
   1 -17  -4   13.81   16.89
   0 -17  -4  187.60   31.41
  -1 -17  -4  107.10   24.83
  -2 -17  -4    4.47   14.53
  -3 -17  -4   48.58   21.70
  -4 -17  -4   16.75   21.17
   5  17   4   30.04   49.54
  -5 -17  -4   68.40   28.73
  -6 -17  -4   10.83   24.94
   7  17   4  -41.87   46.56
   4 -18  -4   -3.58   17.30
   3 -18  -4   34.34   21.76
   2 -18  -4  -10.22   14.13
   1 -18  -4  196.96   33.43
   0 -18  -4   12.61   18.17
  -1 -18  -4  139.98   29.08
  -2 -18  -4   21.66   19.91
  -3 -18  -4    7.74   19.39
  -4 -18  -4   -3.95   16.39
  -5 -18  -4   60.00   27.57
   6  18   4  -33.24   46.74
  -6 -18  -4    2.49   23.89
   4 -19  -4   47.90   26.16
   3 -19  -4  -13.45   17.38
   2 -19  -4    9.08   18.06
   1 -19  -4   -1.47   15.72
   0 -19  -4  115.57   30.56
  -1 -19  -4   20.43   20.45
  -2 -19  -4    4.66   16.92
  -3 -19  -4    3.03   16.82
  -4 -19  -4   13.40   22.09
  -5 -19  -4   16.47   21.37
   4 -20  -4    6.10   21.23
   3 -20  -4    0.89   21.11
   2 -20  -4   -4.43   16.85
   1 -20  -4   23.92   19.89
   0 -20  -4   36.49   23.50
  -1 -20  -4    5.96   19.48
  -2 -20  -4   27.69   21.09
  -3 -20  -4   10.35   19.61
  -4 -20  -4   26.38   22.11
   2 -21  -4   63.94   28.19
   1 -21  -4    5.56   18.25
   0 -21  -4   63.54   28.17
  -1 -21  -4   13.55   21.83
  -2 -21  -4   50.93   25.76
  -2 -21   5   -2.69   16.38
  -1 -21   5   12.37   22.02
   0 -21   5   14.65   23.26
   1 -21   5   73.18   32.46
   2 -21   5  -18.87   20.75
  -4 -20   5  -10.34   14.91
  -3 -20   5   43.15   22.42
  -2 -20   5    0.92   18.75
  -1 -20   5  100.60   31.10
   0 -20   5   39.30   22.98
   1 -20   5   47.53   27.17
   2 -20   5   -3.16   19.29
   3 -20   5   -4.92   19.30
   4 -20   5    1.72   18.52
  -5 -19   5   16.74   16.71
  -4 -19   5   62.97   21.13
  -3 -19   5    9.05   15.85
  -2 -19   5    8.29   18.55
  -1 -19   5  -11.88   16.41
   0 -19   5   61.55   24.57
   1 -19   5   73.14   26.64
   2 -19   5    6.30   19.10
   3 -19   5   -3.50   18.04
   4 -19   5   -3.86   18.64
   5 -19   5   22.96   20.38
   5 -19   5   -3.84   23.11
  -5 -18   5    6.32   15.59
  -4 -18   5   73.96   22.65
  -3 -18   5   -6.79   11.98
  -2 -18   5   15.63   17.54
  -1 -18   5   -3.79   16.83
   0 -18   5  115.50   28.81
   1 -18   5   -2.56   16.26
   2 -18   5  238.46   39.83
   3 -18   5   -1.54   18.66
   4 -18   5   12.35   23.50
   4 -18   5   24.67   19.43
   5 -18   5  -15.70   24.41
   5 -18   5   -8.37   18.09
   6 -18   5   43.27   32.33
  -5 -17   5   12.07   13.91
  -4 -17   5   70.31   20.41
  -3 -17   5   13.12   15.18
  -2 -17   5   78.64   23.33
  -1 -17   5    3.22   15.67
   0 -17   5  153.29   30.46
   1 -17   5   77.92   27.49
   2 -17   5   15.32   19.37
   3 -17   5    7.84   21.16
   3 -17   5   13.13   17.75
   4 -17   5   -0.72   16.72
   4 -17   5  -10.28   18.29
   5 -17   5   -0.28   23.73
   5 -17   5   12.03   18.61
   6 -17   5  -15.50   25.09
   7  16  -5   37.20   34.34
  -5 -16   5  157.12   26.84
  -4 -16   5   -0.73   12.91
  -3 -16   5   80.62   21.38
  -2 -16   5  -13.88   11.57
  -1 -16   5  159.01   27.34
   0 -16   5   39.22   18.02
   1 -16   5  140.58   27.86
   2 -16   5   13.74   19.31
   2 -16   5   14.70   18.38
   3 -16   5    9.41   22.41
   3 -16   5   29.34   20.08
   4 -16   5   37.50   18.74
   4 -16   5   38.95   28.70
   5 -16   5  -24.03   22.86
   5 -16   5    5.44   15.25
   6 -16   5   -8.76   25.25
   7 -16   5  -32.51   25.93
   8  15  -5  -45.47   30.77
   7  15  -5   -7.75   30.71
   6  15  -5   -3.82   23.86
  -5 -15   5    6.84   13.54
   5  15  -5   -9.00   19.49
  -4 -15   5   33.82   14.31
  -3 -15   5    9.00   11.35
  -2 -15   5   23.06   15.19
  -1 -15   5  277.46   36.16
   0 -15   5   99.85   22.51
   1 -15   5  111.54   25.71
   1 -15   5   92.07   26.95
   2 -15   5   -3.17   18.10
   3 -15   5  271.67   41.86
   4 -15   5   17.94   22.34
   5 -15   5   91.87   34.07
   6 -15   5  -15.60   18.46
   7 -15   5   30.86   34.13
   8  14  -5  -33.48   29.90
   7  14  -5  134.16   36.31
   6  14  -5  -16.24   21.52
  -5 -14   5    5.63   13.70
   5  14  -5   11.98   19.30
  -4 -14   5   -6.94    9.81
   4  14  -5  -14.01   12.72
  -3 -14   5  197.12   27.10
  -2 -14   5   40.93   16.78
  -1 -14   5  175.09   28.01
   0 -14   5   68.10   25.20
   0 -14   5   77.86   21.91
   1 -14   5   18.90   20.22
   2 -14   5   82.14   28.81
   3 -14   5   27.53   23.61
   4 -14   5   34.00   24.34
   5 -14   5  -15.74   18.94
   6 -14   5   22.73   26.59
   7 -14   5  -21.31   24.24
   8 -14   5   -2.50   28.80
   8  13  -5  236.46   50.22
   7  13  -5  -13.96   25.13
   6  13  -5  252.46   32.98
   5  13  -5  -11.85   15.01
  -5 -13   5   -7.21   11.26
  -4 -13   5  195.84   27.16
   4  13  -5  227.12   26.01
   3  13  -5   33.91   14.22
  -3 -13   5   26.75   13.67
  -2 -13   5  728.43   70.03
  -1 -13   5    8.98   11.07
  -1 -13   5   21.45   19.72
   0 -13   5   14.21   19.03
   1 -13   5   44.41   23.37
   2 -13   5  151.55   33.93
   3 -13   5   16.51   21.06
   4 -13   5   -3.40   18.39
   5 -13   5    0.79   20.63
   6 -13   5  -17.84   19.51
   7 -13   5  -22.36   23.21
   8 -13   5  -30.14   22.88
   9  12  -5  -27.33   28.51
   8  12  -5  -26.04   24.72
   7  12  -5   45.49   28.83
   6  12  -5   69.37   24.13
   5  12  -5   84.28   22.41
  -5 -12   5   43.62   16.92
  -4 -12   5   -6.68    9.11
   4  12  -5   -4.46   12.03
   3  12  -5  183.34   21.52
  -3 -12   5  157.00   23.92
   2  12  -5   77.67   14.47
  -2 -12   5   59.20   15.65
  -1 -12   5    1.96   19.01
   0 -12   5  118.96   31.07
   1 -12   5    2.14   15.30
   2 -12   5   38.96   21.04
   3 -12   5   18.58   20.68
   4 -12   5  190.22   34.47
   5 -12   5   -2.71   17.04
   6 -12   5   40.59   30.09
   7 -12   5   -9.46   22.84
   8 -12   5   16.60   31.18
   9 -12   5  -27.76   26.97
   9  11  -5  -28.74   29.63
   8  11  -5   16.63   27.36
   7  11  -5  -19.18   21.89
   6  11  -5   43.12   21.09
   5  11  -5   60.78   19.48
  -5 -11   5   62.88   16.48
  -4 -11   5   30.84   12.77
   4  11  -5   27.90   15.28
  -3 -11   5   13.74   10.55
   3  11  -5   37.70   12.89
  -2 -11   5   77.11   15.50
  -2 -11   5   78.32   28.29
   2  11  -5   82.34   13.17
  -1 -11   5  659.23   70.56
   0 -11   5  195.66   40.71
   1 -11   5   48.08   22.74
   2 -11   5   -5.05   14.71
   3 -11   5  267.99   39.18
   4 -11   5   11.13   19.85
   5 -11   5  293.01   43.21
   6 -11   5    5.26   20.73
   7 -11   5   73.50   31.90
   8 -11   5  -25.75   21.12
   9 -11   5   -9.45   28.71
   9  10  -5   22.76   34.43
   8  10  -5   20.03   30.11
   7  10  -5  172.18   28.56
   6  10  -5   -4.11   15.83
  -5 -10   5  481.27   48.14
   5  10  -5  454.74   40.79
  -4 -10   5   79.75   15.88
   4  10  -5  103.93   20.67
  -3 -10   5  327.60   34.88
   3  10  -5  331.24   29.04
  -2 -10   5   67.90   29.54
   2  10  -5   87.36   12.36
  -1 -10   5  658.57   74.38
   1  10  -5  659.37   46.40
   0 -10   5   -8.73   20.53
   0  10  -5    9.58    6.00
   1 -10   5  160.73   30.29
   2 -10   5  117.12   29.91
   3 -10   5  131.34   31.30
   4 -10   5   32.07   21.10
   5 -10   5    3.80   17.91
   6 -10   5    2.77   21.31
   7 -10   5  -25.68   19.25
   8 -10   5  -32.74   21.59
   9 -10   5  -24.81   26.09
  10   9  -5  -38.62   28.37
   9   9  -5  -23.16   28.21
   8   9  -5   79.85   32.60
   7   9  -5    0.07   17.91
   6   9  -5  200.49   26.66
   5   9  -5   15.38   14.56
  -5  -9   5   16.41   10.15
   4   9  -5  229.84   23.02
  -4  -9   5  217.58   26.07
  -2  -9   5  533.19   65.09
  -1  -9   5  -16.58   24.45
   1   9  -5    8.61    6.18
   0  -9   5  180.51   39.80
   0   9  -5  148.24   13.97
   1  -9   5  239.71   36.87
   2  -9   5  244.18   35.68
   3  -9   5  142.36   32.04
   4  -9   5   -0.62   15.74
   5  -9   5  116.52   32.88
   6  -9   5   -1.79   18.11
   7  -9   5   83.43   34.14
   8  -9   5  -22.17   21.72
   9  -9   5  -32.47   24.32
  10  -9   5  -40.01   29.66
  10   8  -5  -35.02   32.38
   9   8  -5   73.20   31.51
   8   8  -5  -20.36   18.64
   7   8  -5   -6.01   18.97
   6   8  -5   21.29   15.43
   5   8  -5  141.59   19.59
  -5  -8   5  152.39   21.59
   4   8  -5  303.09   27.41
  -4  -8   5  272.37   30.22
   3   8  -5   53.33   12.60
  -3  -8   5   30.94   10.04
   2   8  -5  291.01   23.87
   1   8  -5  193.08   16.17
  -1  -8   5  163.29   49.29
   0   8  -5  237.24   19.67
   0  -8   5  290.47   46.53
   1  -8   5   13.92   17.03
   2  -8   5  721.25   69.86
   3  -8   5   36.32   19.68
   4  -8   5  389.11   47.40
   5  -8   5   40.45   21.74
   6  -8   5  385.83   50.39
   7  -8   5    4.90   22.39
   8  -8   5    0.87   26.82
   9  -8   5  -40.97   23.22
  10   7  -5   38.03   33.56
   9   7  -5   18.13   25.58
   8   7  -5  181.47   28.82
   7   7  -5   15.72   16.79
   6   7  -5  502.02   43.58
  -5  -7   5    1.47    8.63
   5   7  -5   10.96   11.17
  -4  -7   5 1163.75   98.84
   4   7  -5 1106.22   80.05
   3   7  -5   -1.31    7.55
   2   7  -5   58.20    9.83
  -1  -7   5  -45.14   25.55
   0   7  -5  616.13   39.93
   0  -7   5  556.38   68.03
   1  -7   5   29.62   18.97
   2  -7   5    0.20    8.77
   3  -7   5  125.98   24.49
   4  -7   5  149.15   27.89
   5  -7   5   80.27   27.56
   6  -7   5   21.97   20.97
   7  -7   5   -3.50   19.40
   8  -7   5  -16.25   23.35
  10  -7   5  -39.24   25.75
  11   6  -5  -31.31   36.91
  10   6  -5  -37.59   25.99
   9   6  -5  196.65   31.84
   8   6  -5  -20.31   17.36
   7   6  -5  185.36   25.45
   6   6  -5   21.20   14.45
   5   6  -5  939.63   69.04
  -4  -6   5  150.44   17.81
   4   6  -5  125.49   16.48
   3   6  -5  385.82   30.47
   2   6  -5   29.18    7.40
   1   6  -5  362.49   26.89
   0  -6   5   13.26   23.67
   0   6  -5   30.60    5.88
   1  -6   5  700.51   69.33
   2  -6   5   82.29   19.93
   3  -6   5   18.72   14.24
   4  -6   5   33.16   19.58
   5  -6   5   48.71   23.53
   6  -6   5   39.42   21.14
   7  -6   5  -16.88   15.01
   8  -6   5  -11.25   23.45
   9  -6   5  -34.88   22.64
  10  -6   5  -50.00   24.58
  11   5  -5  -44.26   35.49
  10   5  -5  -36.99   24.48
   9   5  -5  -12.55   22.08
   8   5  -5   16.09   15.17
   8   5  -5   -0.48   17.98
   7   5  -5   40.27   17.72
   7   5  -5   27.28   15.23
   6   5  -5    6.47   12.77
   5   5  -5   -1.28   10.88
   4   5  -5   42.44   12.60
   3   5  -5 1032.54   71.30
   2   5  -5   50.35   10.03
   1   5  -5   33.75    7.22
   0  -5   5  161.25   38.47
   2  -5   5   -2.91    8.03
   4  -5   5   -4.95   10.50
   4  -5   5    5.36    6.29
   5  -5   5  434.61   50.11
   6  -5   5    9.89   18.58
   7  -5   5  239.12   39.53
   8  -5   5  -23.41   18.25
   9  -5   5   -9.18   25.66
  10  -5   5  -41.19   24.87
  11   4  -5  -48.02   34.71
  10   4  -5  -31.71   22.89
   9   4  -5   61.43   28.34
   8   4  -5   83.68   26.21
   8   4  -5   91.72   25.85
   7   4  -5  377.62   38.12
   7   4  -5  438.53   44.51
   6   4  -5   15.75   12.55
   6   4  -5    6.52   11.65
   5   4  -5  198.96   25.69
   5   4  -5  165.85   20.06
   4   4  -5  409.05   33.11
   3   4  -5  594.18   43.22
   2   4  -5  139.58   13.39
   1   4  -5 1091.56   72.53
   0  -4   5  948.80   63.95
   1  -4   5  145.83   26.55
   2  -4   5  972.00   79.88
   2  -4   5  863.17   65.14
   3  -4   5  125.53   23.73
   3  -4   5  141.05   15.59
   4  -4   5  679.95   68.49
   4  -4   5  828.89   55.18
   5  -4   5   17.52    9.74
   5  -4   5    5.65   16.86
   6  -4   5  630.08   64.74
   6  -4   5  589.66   47.74
   7  -4   5   -9.81   17.36
   8  -4   5   26.37   29.21
   9  -4   5  -27.53   20.47
  10  -4   5  -17.02   30.59
  10   3  -5   44.26   34.19
   9   3  -5    7.76   19.93
   9   3  -5   -6.30   24.08
   8   3  -5  241.38   37.01
   8   3  -5  260.12   31.34
   7   3  -5   22.46   20.31
   7   3  -5   56.56   20.92
   6   3  -5  356.81   38.29
   6   3  -5  350.71   32.66
   5   3  -5  100.57   19.40
   5   3  -5   92.93   15.94
   4   3  -5 1628.65  116.45
   4   3  -5 1740.53  129.61
  -4  -3   5 1806.19  144.09
   3   3  -5   27.17    8.75
   2   3  -5 1010.43   68.34
   1   3  -5 1375.00   90.50
   0  -3   5  882.62   60.46
   2  -3   5  332.27   29.49
   2  -3   5  326.69   36.47
   3  -3   5 1047.21   74.63
   3  -3   5 1029.07   87.04
   4  -3   5  140.85   18.17
   4  -3   5  162.28   27.55
   5  -3   5    7.37   11.90
   5  -3   5   -4.26   13.04
   6  -3   5   20.59   14.03
   6  -3   5   26.96   20.16
   7  -3   5   18.12   17.72
   7  -3   5   41.17   25.41
   8  -3   5    5.76   19.55
   9  -3   5  -10.03   23.22
  10  -3   5  -46.21   27.26
  11   2  -5  -45.36   32.26
  10   2  -5   -5.45   22.47
  10   2  -5  -53.21   25.31
   9   2  -5   48.91   29.00
   9   2  -5   52.15   28.78
   8   2  -5  130.13   27.63
   8   2  -5   65.90   25.60
   7   2  -5    5.43   16.00
   7   2  -5    7.70   17.75
   6   2  -5    7.80   12.21
   6   2  -5   10.47   13.15
   5   2  -5  587.64   46.46
   5   2  -5  617.29   53.65
   4   2  -5   20.60   10.16
   3   2  -5  206.91   19.13
   3   2  -5  232.40   25.06
   2   2  -5  146.33   13.26
   1   2  -5  152.35   12.18
   0  -2   5  360.09   27.91
   1  -2   5  357.67   37.56
   1  -2   5  337.16   31.78
   2  -2   5  315.96   28.14
   2  -2   5  241.34   30.57
   3  -2   5  121.51   18.00
   3  -2   5  122.05   21.57
   4  -2   5 1734.54  120.58
   4  -2   5 1730.75  135.58
   5  -2   5  107.43   18.86
   5  -2   5  158.83   30.62
   6  -2   5  122.32   25.46
   6  -2   5   85.12   26.01
   7  -2   5    4.11   16.18
   7  -2   5  -13.12   17.47
   8  -2   5  117.38   35.02
   8  -2   5  166.87   28.16
   9  -2   5  -28.02   23.38
  10  -2   5  -13.58   27.68
  11   1  -5  -36.29   30.36
  11   1  -5   -2.28   25.36
  10   1  -5   -9.56   28.56
  10   1  -5   15.53   25.35
   9   1  -5  -10.96   21.49
   9   1  -5  -26.16   21.31
   8   1  -5  270.51   31.72
   8   1  -5  274.19   39.24
   7   1  -5   31.01   16.60
   7   1  -5    8.95   16.28
   6   1  -5  142.89   20.57
   6   1  -5  166.74   25.51
   5   1  -5   35.56   12.43
   4   1  -5    7.30    8.89
   4   1  -5    6.58    8.21
   3   1  -5  479.88   36.70
   3   1  -5  519.23   42.43
   2   1  -5 1540.69  101.93
  -1  -1   5  408.39   29.80
   0  -1   5  113.69   14.18
   1  -1   5  716.16   55.16
   1  -1   5  669.94   59.69
   2  -1   5  854.98   70.95
   2  -1   5  854.45   65.06
   3  -1   5  744.50   67.22
   3  -1   5  836.52   62.52
   4  -1   5  404.40   37.16
   4  -1   5  377.80   41.78
   5  -1   5  364.50   42.03
   5  -1   5  411.91   38.03
   6  -1   5  -14.55   14.13
   6  -1   5   -3.39   14.84
   7  -1   5  255.48   33.18
   7  -1   5  270.07   37.72
   8  -1   5  -23.22   21.10
   8  -1   5   -2.54   19.02
   9  -1   5   56.65   35.13
   9  -1   5   45.44   32.54
  11   0  -5   41.34   35.39
  11   0  -5  108.93   41.16
  10   0  -5  -35.96   22.53
  10   0  -5  -33.18   22.74
   9   0  -5  140.76   33.31
   9   0  -5   96.69   31.65
   8   0  -5   27.69   20.91
   8   0  -5   -6.77   17.80
   7   0  -5  969.39   74.74
   7   0  -5 1018.48   86.20
   6   0  -5    6.16   11.32
   6   0  -5  -10.04   12.64
   5   0  -5   -2.19    9.30
   5   0  -5   20.66   10.90
   4   0  -5   -6.56    6.92
   4   0  -5   -4.71    5.88
   3   0  -5  744.49   53.88
   3   0  -5  797.15   60.36
   2   0  -5   -0.71    3.74
   2   0  -5    1.08    4.82
  -1   0   5 2810.73  184.03
   0   0   5   -0.35    9.05
   1   0   5  520.38   44.98
   2   0   5   12.71    9.54
   2   0   5    1.96   12.18
   3   0   5 3081.38  217.29
   3   0   5 2878.23  202.81
   4   0   5   15.32   12.72
   5   0   5   29.94   18.39
   5   0   5   14.29   13.12
   6   0   5  -13.97   13.05
   6   0   5   -9.76    9.91
   7   0   5    7.90   20.83
   7   0   5   12.01   19.03
   8   0   5  -20.27   17.65
   8   0   5  -12.65   17.62
   9   0   5   -4.44   22.43
  11  -1  -5  -38.76   25.46
  11  -1  -5  -12.10   27.79
  10  -1  -5    8.58   24.44
  10  -1  -5   12.91   24.08
   9  -1  -5    1.85   21.94
   9  -1  -5   -9.37   19.13
   8  -1  -5  242.22   28.41
   8  -1  -5  210.95   36.25
   7  -1  -5   -0.47   15.69
   7  -1  -5   24.21   15.31
   6  -1  -5  147.12   24.69
   6  -1  -5  134.43   18.78
   5  -1  -5   43.91   13.61
   5  -1  -5   11.73   12.76
   4  -1  -5   13.93    8.73
   4  -1  -5    0.96    8.60
   3  -1  -5  506.12   40.49
   3  -1  -5  461.75   35.57
  -2   1   5 1773.09  108.26
   2  -1  -5 1460.26  115.68
  -1   1   5  420.80   32.00
   1  -1  -5  410.00   33.94
   0   1   5  118.67   19.06
   1   1   5  792.54   63.86
   2   1   5  976.02   73.72
   2   1   5  904.50   73.81
   3   1   5  759.42   67.30
   3   1   5  952.07   71.23
   4   1   5  344.79   37.29
   4   1   5  387.24   38.52
   5   1   5  469.02   44.90
   5   1   5  444.91   45.19
   6   1   5   -6.14   12.55
   6   1   5  -13.25   14.39
   7   1   5  289.11   38.12
   7   1   5  294.26   38.37
   8   1   5  -11.51   18.53
   8   1   5  -10.85   16.21
   9   1   5   30.57   38.09
  10   1   5  -62.69   29.89
  11  -2  -5   -0.18   27.29
  10  -2  -5   -4.99   20.23
  10  -2  -5  -15.06   21.19
   9  -2  -5   64.72   27.78
   9  -2  -5   59.14   22.06
   8  -2  -5   86.12   27.99
   8  -2  -5  113.67   25.42
   7  -2  -5   15.01   15.71
   7  -2  -5   18.03   13.50
   6  -2  -5   16.06   14.04
   6  -2  -5   27.51   13.02
   5  -2  -5  624.04   46.51
   5  -2  -5  575.67   52.72
   4  -2  -5   15.40   10.37
   4  -2  -5   18.17    9.22
   3  -2  -5  217.64   22.00
   2  -2  -5  162.32   16.20
  -2   2   5  152.20   15.93
   1  -2  -5  206.48   18.47
  -1   2   5  201.50   19.69
   0   2   5  337.72   33.88
   1   2   5  412.50   41.66
   2   2   5  279.65   27.82
   2   2   5  285.79   32.16
   3   2   5  169.67   25.40
   3   2   5  178.41   21.48
   4   2   5 2108.77  144.48
   4   2   5 1765.34  137.85
   5   2   5  162.21   26.48
   5   2   5  146.91   22.34
   6   2   5   93.14   21.82
   6   2   5   82.27   30.50
   7   2   5   18.61   18.79
   7   2   5   15.88   24.87
   8   2   5  216.69   47.56
   9   2   5  -38.72   32.95
  10   2   5  -18.35   43.16
  11  -3  -5  -10.26   27.25
  10  -3  -5   76.37   33.09
   9  -3  -5    2.94   16.27
   9  -3  -5    5.63   19.36
   8  -3  -5  244.90   35.92
   8  -3  -5  218.58   27.21
   7  -3  -5  100.81   21.12
   7  -3  -5   47.39   20.37
   6  -3  -5  379.53   39.74
   6  -3  -5  359.99   33.22
   5  -3  -5   98.58   19.27
   5  -3  -5   96.97   14.75
   3  -3  -5   15.15    9.23
  -3   3   5   28.65   11.14
   3  -3  -5    6.80    9.23
   2  -3  -5  897.82   86.65
   2  -3  -5 1039.59   71.27
  -2   3   5  936.84   67.26
  -1   3   5 1681.20  114.85
   1  -3  -5 1723.16  118.02
   1  -3  -5 1575.71  145.42
   0   3   5  721.33   58.69
   0  -3  -5  638.81   65.89
  -1  -3  -5    0.92    8.51
   1   3   5    0.29   16.13
   2   3   5  371.29   35.38
   2   3   5  470.08   44.74
   3   3   5 1216.98   97.86
   3   3   5 1355.15   96.34
   4   3   5  225.82   29.84
   4   3   5  210.53   24.45
   5   3   5   20.73   13.69
   5   3   5   24.95   21.46
   6   3   5   35.38   25.51
   6   3   5   26.63   15.36
   7   3   5   22.11   30.50
   8   3   5   15.57   27.89
   9   3   5  -18.27   35.96
  11  -4  -5   -2.55   26.12
  10  -4  -5  -13.52   22.28
   9  -4  -5  108.01   24.48
   9  -4  -5   76.27   29.26
   8  -4  -5   85.79   27.24
   8  -4  -5   94.37   22.28
   7  -4  -5  323.59   32.56
   7  -4  -5  387.95   42.19
   6  -4  -5   24.21   12.96
   6  -4  -5    1.98   12.59
   5  -4  -5  191.22   25.24
   4  -4  -5  445.91   37.53
  -4   4   5  393.71   33.59
   4  -4  -5  349.80   40.97
   3  -4  -5  659.21   61.64
  -3   4   5  629.68   48.24
   3  -4  -5  645.61   51.37
   2  -4  -5  143.25   21.65
   2  -4  -5  134.13   15.74
  -2   4   5  188.84   19.14
   1  -4  -5 1348.36  114.41
  -1   4   5 1252.16   93.26
   1  -4  -5 1220.33   91.04
   0   4   5  719.60   67.33
   0  -4  -5  835.61   76.18
   0  -4  -5  799.83   57.39
  -1  -4  -5  172.73   27.15
   1   4   5  209.53   40.75
   2   4   5 1290.00   96.98
  -2  -4  -5 1171.19  114.00
   3   4   5  173.58   18.37
  -3  -4  -5  177.47   35.47
   3   4   5  169.48   27.91
   4   4   5  796.09   71.21
   4   4   5  912.17   66.24
   5   4   5   55.77   23.57
   5   4   5   11.66   12.00
   6   4   5  648.28   61.01
   7   4   5    4.17   25.38
   8   4   5   55.56   32.99
   9   4   5  -53.32   25.12
  10   4   5  -51.47   37.35
  11  -5  -5   -2.86   29.07
  10  -5  -5  -17.80   18.18
   9  -5  -5   -0.54   15.96
   8  -5  -5   14.81   17.62
   8  -5  -5   30.11   15.37
   7  -5  -5   23.27   15.86
   6  -5  -5    9.11   13.10
   5  -5  -5   21.82   13.36
  -5   5   5   10.69   13.76
   4  -5  -5    6.47   10.22
  -4   5   5   34.03   12.92
  -3   5   5 1008.04   76.05
   3  -5  -5 1060.95   80.34
   3  -5  -5 1136.59   95.78
   2  -5  -5   36.18   10.52
   2  -5  -5   33.89   12.57
  -2   5   5   49.79   15.72
   1  -5  -5   24.17    6.82
   1  -5  -5    8.01   10.54
  -1   5   5   35.58   19.53
   0   5   5  172.17   37.39
   0  -5  -5  180.39   15.95
   0  -5  -5  193.00   26.56
   1   5   5  578.67   59.68
  -1  -5  -5  710.78   64.85
  -2  -5  -5    2.60   11.44
   2   5   5  -29.42   17.17
   3   5   5  535.91   54.59
   3   5   5  584.21   41.60
  -3  -5  -5  528.79   61.77
   4   5   5   -6.41    6.98
   4   5   5   -5.07   20.35
  -4  -5  -5   -7.76   17.26
   5   5   5  439.83   46.68
   6   5   5   31.46   21.78
   7   5   5  220.65   36.68
   8   5   5  -57.59   29.14
   9   5   5  -47.37   35.12
  11  -6  -5    3.76   25.93
  10  -6  -5   -2.55   20.08
   9  -6  -5  180.32   32.94
   8  -6  -5    5.58   17.25
   7  -6  -5  185.86   28.72
  -7   6   5  183.69   24.83
   6  -6  -5    5.43    9.32
  -6   6   5    3.32   14.41
  -5   6   5  939.23   68.90
   5  -6  -5  915.08   75.12
  -4   6   5  175.76   20.87
   4  -6  -5  129.57   21.76
   4  -6  -5  139.05   19.53
   3  -6  -5  386.29   34.82
   3  -6  -5  415.79   41.31
  -3   6   5  407.33   35.77
   2  -6  -5   14.92    9.57
  -2   6   5   32.58   17.09
   2  -6  -5   10.03    7.55
   1  -6  -5  402.74   40.67
   1  -6  -5  368.97   30.02
  -1   6   5  342.68   40.61
   0  -6  -5   35.58    6.29
   0   6   5   21.03   23.80
   0  -6  -5   31.26   12.94
  -1  -6  -5  961.54   83.88
   1   6   5  810.35   76.14
   2   6   5  164.21   39.25
  -2  -6  -5  210.07   29.29
  -3  -6  -5   44.76   19.56
   3   6   5    2.44   20.22
   4   6   5   41.81   24.89
  -4  -6  -5   19.91   22.23
   5   6   5   67.34   28.70
  -5  -6  -5   39.39   27.32
   6   6   5   55.85   30.51
   7   6   5  -38.40   22.26
   8   6   5    4.62   33.70
  10  -7  -5   69.32   29.56
   9  -7  -5   -0.43   19.35
   8  -7  -5  217.01   33.41
   7  -7  -5    8.83   15.37
  -7   7   5   -0.82   15.87
   6  -7  -5  486.98   46.45
  -6   7   5  449.53   40.37
  -5   7   5   -4.47   13.73
   5  -7  -5    1.58   10.30
   4  -7  -5 1134.89   86.98
   4  -7  -5 1173.01  101.20
  -4   7   5 1073.67   82.00
   3  -7  -5   -0.60    6.77
  -3   7   5    8.68   14.18
   3  -7  -5   -1.87    5.92
   2  -7  -5   49.27    9.65
   2  -7  -5   66.90   14.39
  -2   7   5   61.98   25.09
   1  -7  -5   -1.54    4.67
  -1   7   5  -29.61   19.32
   1  -7  -5   -3.67    7.71
   0  -7  -5  731.27   52.92
   0   7   5  690.48   68.52
   0  -7  -5  751.97   69.00
   1   7   5  -12.24   21.75
  -1  -7  -5    4.78    9.67
   2   7   5  -24.63   18.58
  -2  -7  -5   -3.02   13.08
   3   7   5  155.24   37.51
  -3  -7  -5  136.62   28.75
  -4  -7  -5  171.28   32.85
   4   7   5  182.97   33.12
  -5  -7  -5   77.10   29.22
   5   7   5  122.66   35.17
   6   7   5   68.98   31.48
   7   7   5  -46.95   30.07
   8   7   5  -57.21   30.46
  10  -8  -5    9.58   24.39
   9  -8  -5   70.44   28.03
   8  -8  -5    6.45   17.53
   7  -8  -5   17.20   15.77
   6  -8  -5   -1.35   12.00
  -6   8   5    2.41   13.93
  -5   8   5  174.06   22.77
   5  -8  -5  148.27   22.46
   4  -8  -5  272.91   32.30
  -4   8   5  281.54   31.90
   4  -8  -5  282.51   29.06
  -3   8   5   52.18   24.42
   3  -8  -5   42.95   13.97
   3  -8  -5   65.95   13.52
  -2   8   5  271.73   39.58
   2  -8  -5  335.78   34.78
   2  -8  -5  319.43   27.42
  -1   8   5  266.57   40.53
   1  -8  -5  219.43   20.39
   1  -8  -5  193.75   27.61
   0   8   5  241.75   38.12
   0  -8  -5  255.38   20.68
   0  -8  -5  244.03   30.80
  -1  -8  -5   20.50    5.36
  -1  -8  -5   19.87   11.90
   1   8   5  -16.21   26.35
   2   8   5  982.49   86.40
  -2  -8  -5 1025.86   94.72
  -3  -8  -5   33.94   18.71
   3   8   5   35.08   27.12
  -4  -8  -5  416.58   52.75
   4   8   5  500.01   53.50
  -5  -8  -5   45.29   22.03
   5   8   5   55.56   29.52
   6   8   5  536.62   58.25
  -6  -8  -5  396.48   60.57
   7   8   5   41.14   39.99
   8   8   5   21.97   42.32
  10   8   5  -72.33   43.23
  10  -9  -5    4.12   23.64
   9  -9  -5   -2.04   19.73
   8  -9  -5   66.50   24.80
   7  -9  -5   -1.28   13.41
   6  -9  -5  197.13   27.29
   5  -9  -5   12.65   12.24
  -4   9   5  277.55   33.79
   4  -9  -5  215.83   26.01
   4  -9  -5  234.21   30.36
   3  -9  -5  141.31   22.55
   3  -9  -5  138.09   18.29
  -3   9   5  195.31   40.58
   2  -9  -5  775.34   72.11
   2  -9  -5  737.80   58.87
  -2   9   5  786.26   75.51
   1  -9  -5    0.09    8.01
   1  -9  -5   -0.35    5.50
  -1   9   5  -36.55   23.01
   0  -9  -5  214.40   28.56
   0  -9  -5  223.99   19.39
   0   9   5  239.19   48.17
   1   9   5  294.48   41.82
  -1  -9  -5  313.87   36.19
  -2  -9  -5  332.43   39.49
   2   9   5  290.00   42.82
   3   9   5  162.71   40.40
  -3  -9  -5  160.53   27.84
   4   9   5  -10.60   25.86
  -4  -9  -5    5.35   17.19
  -5  -9  -5   95.02   30.64
   5   9   5  158.64   44.15
   6   9   5  -17.86   26.84
  -6  -9  -5   -1.66   21.38
   7   9   5  170.91   50.79
  10 -10  -5  -21.59   22.40
   9 -10  -5   59.48   26.94
   8 -10  -5   29.86   20.41
   7 -10  -5  135.80   24.85
   6 -10  -5   21.99   15.05
   5 -10  -5  406.01   40.38
   4 -10  -5   94.35   18.85
   4 -10  -5   82.48   19.48
  -3  10   5  368.16   49.49
   3 -10  -5  350.75   39.47
   3 -10  -5  326.53   32.09
   2 -10  -5   74.67   13.21
   2 -10  -5   85.32   18.81
  -2  10   5  114.19   42.85
   1 -10  -5  697.78   70.24
  -1  10   5  815.02   75.71
   1 -10  -5  713.01   55.79
   0  10   5    0.82   27.19
   0 -10  -5   12.00   10.50
   0 -10  -5   13.04    6.06
   1  10   5  298.54   53.26
  -1 -10  -5  222.06   31.62
  -2 -10  -5  147.09   25.05
   2  10   5  140.90   43.21
   3  10   5  165.05   44.11
  -3 -10  -5  148.37   28.86
  -4 -10  -5   19.01   19.89
   4  10   5   18.79   32.70
   5  10   5   -7.70   28.77
  -5 -10  -5   15.75   19.68
  -6 -10  -5    9.00   22.71
   6  10   5    1.78   37.81
   7  10   5  -38.98   29.85
   8  10   5  -61.82   37.22
   9 -11  -5    3.07   18.35
   8 -11  -5   19.43   18.14
   7 -11  -5    5.27   14.66
   6 -11  -5   27.80   16.10
   5 -11  -5   59.79   18.00
   4 -11  -5   22.04   14.27
   4 -11  -5   44.61   14.55
   3 -11  -5   28.72   11.99
   3 -11  -5   37.14   13.65
  -2  11   5   96.59   42.66
   2 -11  -5   69.16   13.63
   2 -11  -5   78.90   18.92
  -1  11   5 1115.20   93.35
   1 -11  -5  904.65   92.61
   0 -11  -5  201.70   29.48
   0  11   5  267.88   51.15
  -1 -11  -5   82.08   19.10
   1  11   5   43.64   34.37
  -2 -11  -5    3.80   12.72
   2  11   5  -33.73   27.65
  -3 -11  -5  368.61   44.61
   3  11   5  346.27   46.84
   4  11   5  -11.79   27.56
  -4 -11  -5   13.26   17.76
  -5 -11  -5  302.98   45.70
   5  11   5  379.78   49.65
   6  11   5  -57.84   27.41
  -6 -11  -5   23.53   22.98
   7  11   5  133.51   50.83
   8  11   5  -75.19   40.88
   9  11   5  -31.46   50.20
   9 -12  -5   -7.63   17.67
   8 -12  -5   10.15   18.87
   7 -12  -5   56.75   22.63
   6 -12  -5   45.92   18.57
   5 -12  -5   45.36   17.47
   4 -12  -5   -0.07   10.39
   4 -12  -5   -8.98   11.45
   3 -12  -5  150.99   24.97
   3 -12  -5  161.10   20.88
   2 -12  -5   69.64   17.82
   2 -12  -5   59.82   11.56
   1 -12  -5   23.88   13.83
  -1  12   5    5.98   33.95
   0 -12  -5  174.61   26.48
   0  12   5  165.94   45.70
   1  12   5   -9.48   27.61
  -1 -12  -5   -0.02   11.22
   2  12   5   28.15   29.19
  -2 -12  -5   53.85   18.34
  -3 -12  -5   24.60   17.57
   3  12   5   19.97   29.47
  -4 -12  -5  247.60   38.39
   4  12   5  247.11   42.87
  -5 -12  -5   -0.80   19.07
   5  12   5  -58.90   32.53
  -6 -12  -5  100.96   30.18
   6  12   5   22.44   41.45
   7  12   5  -70.72   41.11
   8  12   5   20.09   46.14
   9  12   5  -72.17   42.09
   9 -13  -5  -14.58   17.49
   8 -13  -5  160.53   35.75
   7 -13  -5    4.75   16.06
   6 -13  -5  210.61   29.20
   5 -13  -5    7.32   12.33
   4 -13  -5  197.94   25.08
   4 -13  -5  206.76   31.31
   3 -13  -5   38.38   17.08
   3 -13  -5   54.31   15.45
   2 -13  -5  679.90   68.67
   2 -13  -5  690.66   54.97
   1 -13  -5   23.30   15.92
   0  13   5   46.44   29.84
   0 -13  -5   52.09   17.97
   1  13   5   34.28   35.10
   2  13   5  190.44   49.00
  -2 -13  -5  203.42   32.06
  -3 -13  -5    7.60   14.98
   3  13   5  -15.59   24.42
  -4 -13  -5   -9.68   16.84
   4  13   5  -27.38   27.79
   5  13   5  -40.35   37.14
  -5 -13  -5   -4.15   17.61
  -6 -13  -5    0.20   20.98
   7  13   5  -88.72   41.29
   8  13   5  -89.15   50.97
   8 -14  -5   10.85   18.34
   7 -14  -5  139.39   30.82
   6 -14  -5   -3.36   14.91
   5 -14  -5   12.24   13.61
   4 -14  -5  -13.67   12.84
   4 -14  -5    0.41   10.05
   3 -14  -5  230.20   33.39
   3 -14  -5  208.50   24.50
   2 -14  -5   51.61   19.20
   1 -14  -5  151.66   27.66
   0 -14  -5  121.76   25.36
  -1 -14  -5   24.93   16.85
   1  14   5    4.93   35.48
  -2 -14  -5  104.09   25.47
   2  14   5  110.90   39.27
  -3 -14  -5   35.93   20.04
   3  14   5   33.99   31.03
   4  14   5   53.12   42.84
  -4 -14  -5   50.44   22.77
  -5 -14  -5   12.09   22.00
   5  14   5   -9.32   36.03
  -6 -14  -5   46.15   28.27
   6  14   5  -19.58   37.23
   8  14   5 -102.28   51.61
   8 -15  -5   -4.68   20.44
   7 -15  -5   -6.07   17.19
   6 -15  -5   15.75   17.00
   5 -15  -5   11.91   14.99
   4 -15  -5   23.99   18.40
   4 -15  -5   28.58   14.00
   3 -15  -5   16.96   15.51
   2 -15  -5   15.34   15.41
   1 -15  -5  246.50   34.77
   0 -15  -5  104.63   23.35
  -1 -15  -5  111.74   23.87
  -2 -15  -5   11.65   15.05
   2  15   5   11.99   31.73
  -3 -15  -5  337.92   44.02
   3  15   5  274.55   45.92
  -4 -15  -5   23.69   22.07
   4  15   5   -2.01   39.54
  -5 -15  -5  146.62   33.01
   5  15   5  150.61   58.17
  -6 -15  -5    0.70   22.26
   7  15   5   69.71   62.44
   7 -16  -5   42.59   21.52
   6 -16  -5   -2.92   15.48
   5 -16  -5  137.37   23.12
   4 -16  -5    9.67   15.69
   3 -16  -5   84.60   23.81
   2 -16  -5  -10.47   13.73
   1 -16  -5  157.31   29.23
   0 -16  -5   35.54   19.14
  -1 -16  -5  144.11   28.08
  -2 -16  -5   16.68   18.60
   3  16   5   53.67   38.92
  -3 -16  -5   29.07   21.56
   4  16   5    5.16   38.96
  -4 -16  -5   33.05   23.59
   5  16   5  -43.26   36.33
  -5 -16  -5   16.64   23.97
  -6 -16  -5   -9.57   21.86
   6  16   5  -61.85   38.80
   6 -17  -5   85.05   24.88
   4 -17  -5   72.09   25.69
   3 -17  -5    9.91   17.63
   2 -17  -5   68.30   22.93
   1 -17  -5    3.67   13.90
   0 -17  -5  114.77   25.93
  -1 -17  -5   59.63   22.71
  -2 -17  -5   24.51   20.08
  -3 -17  -5    6.63   17.01
   4  17   5  -54.55   34.90
  -4 -17  -5    7.87   20.32
   5  17   5  -46.16   44.65
  -5 -17  -5   13.02   23.39
  -6 -17  -5   -2.28   23.46
   6  17   5  -82.20   48.63
   4 -18  -5   82.01   26.63
   3 -18  -5    8.84   18.19
   2 -18  -5   25.68   18.54
   1 -18  -5    7.41   16.09
   0 -18  -5   94.67   27.79
  -1 -18  -5    5.82   17.91
  -2 -18  -5  171.80   31.85
  -3 -18  -5   -7.51   15.64
  -4 -18  -5   49.77   26.24
  -5 -18  -5  -10.13   20.94
  -6 -18  -5  121.22   39.04
   6  18   5   97.16   58.68
   4 -19  -5   83.48   29.19
   3 -19  -5   18.96   20.82
   2 -19  -5   31.42   20.83
   1 -19  -5    1.63   16.33
   0 -19  -5   64.93   25.91
  -1 -19  -5   49.38   21.81
  -2 -19  -5    7.07   18.49
  -3 -19  -5    8.07   20.69
  -4 -19  -5   11.28   20.33
  -5 -19  -5   37.87   28.00
   4 -20  -5    1.22   21.37
   3 -20  -5   78.02   29.25
   2 -20  -5    9.16   18.31
   1 -20  -5  100.39   28.76
   0 -20  -5    8.20   17.62
  -1 -20  -5   42.72   22.78
  -2 -20  -5    8.08   19.46
  -3 -20  -5   -6.65   17.75
  -4 -20  -5   18.86   22.67
   2 -21  -5    6.06   19.53
   1 -21  -5   27.62   20.98
   0 -21  -5   31.02   22.99
  -1 -21  -5   43.12   24.07
  -2 -21  -5    4.32   17.00
  -1 -21   6  -11.21   20.49
   0 -21   6   -1.36   23.21
   1 -21   6   47.43   28.27
  -3 -20   6   -8.24   15.89
  -2 -20   6   74.75   25.63
  -1 -20   6   -0.90   20.69
   0 -20   6   86.61   29.02
   1 -20   6    1.68   22.25
   2 -20   6   96.38   31.36
   3 -20   6   -5.30   16.40
  -4 -19   6   29.13   18.18
  -3 -19   6   90.48   25.78
  -2 -19   6  -10.43   12.94
  -1 -19   6   26.54   21.82
   0 -19   6    3.60   17.75
   1 -19   6   74.70   27.12
   2 -19   6   -3.57   19.61
   3 -19   6   18.55   21.75
   4 -19   6    0.05   18.85
   5 -19   6   18.43   20.97
  -4 -18   6    4.46   12.80
  -3 -18   6   15.30   15.48
  -2 -18   6   -3.82   13.41
  -1 -18   6   13.05   16.75
   0 -18   6   -2.40   17.89
   1 -18   6   42.44   24.37
   2 -18   6    7.97   18.32
   3 -18   6    7.43   16.86
   4 -18   6    3.13   15.59
   4 -18   6   -3.97   26.46
   5 -18   6  -28.84   24.87
   5 -18   6  -11.62   15.12
  -4 -17   6   60.40   20.09
  -3 -17   6   84.64   21.94
  -2 -17   6   -9.41   11.45
  -1 -17   6  113.54   26.68
   0 -17   6   78.59   24.23
   1 -17   6  236.79   37.86
   2 -17   6   -6.43   17.16
   3 -17   6  176.66   42.07
   3 -17   6  171.29   33.05
   4 -17   6   -0.10   14.61
   4 -17   6  -17.67   20.08
   5 -17   6   35.07   30.83
   5 -17   6  148.27   28.97
   6 -17   6  -16.47   26.36
   7  16  -6   -1.41   30.36
  -4 -16   6   69.97   18.94
  -3 -16   6   -2.34   10.97
  -2 -16   6   49.19   17.70
  -1 -16   6   -7.13   13.63
   0 -16   6  190.73   31.55
   1 -16   6   20.34   19.63
   2 -16   6  196.20   42.62
   3 -16   6   -0.40   22.01
   4 -16   6   78.56   34.22
   5 -16   6   -6.97   23.35
   6 -16   6   37.31   31.36
   7 -16   6  -34.19   31.82
   8  15  -6   29.71   33.64
   7  15  -6  -32.07   25.39
   6  15  -6  178.80   38.35
  -5 -15   6   -8.26    9.83
  -4 -15   6   30.21   14.89
  -3 -15   6    9.85   12.36
  -2 -15   6  142.29   24.07
  -1 -15   6    7.66   13.74
   0 -15   6   38.97   17.40
   1 -15   6   27.69   21.51
   2 -15   6   33.06   24.56
   3 -15   6   16.87   26.47
   4 -15   6   -1.70   23.12
   5 -15   6    6.19   25.92
   6 -15   6  -18.44   25.70
   7 -15   6  -42.49   28.07
   8  14  -6  -40.00   28.59
   7  14  -6   -4.92   25.32
   6  14  -6   32.92   24.30
  -5 -14   6   56.15   18.67
   5  14  -6  120.00   27.48
  -4 -14   6    8.00   11.54
   4  14  -6   -0.03   14.65
  -3 -14   6   41.87   16.56
  -2 -14   6   53.09   18.06
  -1 -14   6   55.64   18.31
   0 -14   6  238.85   38.53
   1 -14   6    7.24   19.83
   2 -14   6   38.66   25.49
   3 -14   6    2.97   20.93
   4 -14   6  137.42   39.04
   5 -14   6   -8.75   17.37
   6 -14   6  -31.66   21.95
   7 -14   6  -28.07   28.06
   8 -14   6  -27.15   30.25
   8  13  -6  -14.09   28.64
   7  13  -6   60.20   27.80
   6  13  -6   23.81   21.79
   5  13  -6  186.33   25.84
  -5 -13   6  171.32   25.91
   4  13  -6    8.63   14.12
  -4 -13   6    3.86   10.02
   3  13  -6  118.05   17.50
  -3 -13   6  114.23   20.25
  -2 -13   6  104.61   20.33
  -1 -13   6  809.74   81.27
   0 -13   6   -1.04   18.24
   1 -13   6  212.60   37.74
   2 -13   6  -21.99   16.19
   3 -13   6  453.18   57.41
   4 -13   6    1.99   21.93
   5 -13   6  147.39   41.05
   6 -13   6  -14.31   22.75
   7 -13   6   21.20   29.19
   8 -13   6  -43.21   23.89
   9  12  -6  -44.33   28.87
   8  12  -6  -44.33   20.78
   7  12  -6  214.82   40.71
   6  12  -6   12.56   20.31
   5  12  -6   98.13   22.86
  -5 -12   6   68.74   18.47
   4  12  -6   -7.27   10.47
  -4 -12   6   -4.61    8.64
  -3 -12   6  141.49   22.62
   3  12  -6  201.85   20.57
  -2 -12   6   85.75   32.70
   2  12  -6  103.90   14.98
  -2 -12   6  104.28   18.45
  -1 -12   6  210.21   41.22
   0 -12   6  129.33   38.08
   1 -12   6   -9.79   18.87
   2 -12   6   -3.32   19.00
   3 -12   6   20.97   22.65
   4 -12   6   45.80   26.56
   5 -12   6    8.64   24.07
   6 -12   6    4.70   25.72
   7 -12   6   -8.96   25.51
   8 -12   6  -28.33   24.37
   9 -12   6  -26.84   27.60
   9  11  -6  -42.51   25.73
   8  11  -6   90.65   32.28
   7  11  -6  -20.82   20.73
   6  11  -6  183.44   26.59
   5  11  -6  -10.10   11.88
  -5 -11   6   -4.19    9.22
  -4 -11   6   73.53   16.36
   4  11  -6  104.70   19.98
   3  11  -6    7.15    9.71
  -3 -11   6   -6.32    7.44
   2  11  -6  427.87   30.68
  -2 -11   6  305.13   48.93
  -1 -11   6    5.78   26.75
   0 -11   6  -17.30   20.87
   1 -11   6  203.72   45.75
   2 -11   6   51.88   25.03
   3 -11   6  128.94   36.26
   4 -11   6   -9.68   17.65
   5 -11   6   14.55   24.42
   6 -11   6   14.02   25.34
   7 -11   6  -18.60   20.28
   8 -11   6   -9.33   26.09
   9 -11   6  -43.34   24.64
  10  10  -6  -35.63   30.50
   9  10  -6  -37.27   24.76
   8  10  -6   -2.15   26.38
   7  10  -6   23.63   21.32
   6  10  -6  120.86   27.72
   5  10  -6   15.90   14.15
  -5 -10   6    0.67    9.47
  -4 -10   6  252.58   28.82
   4  10  -6  260.66   26.00
   3  10  -6   75.62   15.24
  -3 -10   6   54.95   13.05
  -2 -10   6  268.95   45.39
   1  10  -6   -5.51    6.14
  -1 -10   6  -18.86   23.41
   0 -10   6  855.17   92.30
   1 -10   6  -12.65   19.89
   2 -10   6  529.28   61.60
   3 -10   6   60.98   24.81
   4 -10   6  505.14   60.30
   5 -10   6   13.57   22.26
   6 -10   6  178.43   43.57
   7 -10   6  -31.19   20.89
   8 -10   6    4.21   28.47
   9 -10   6  -25.27   26.59
  10   9  -6  -13.44   35.72
   9   9  -6  -22.48   28.63
   8   9  -6  121.67   35.19
   7   9  -6   11.75   18.61
   6   9  -6   30.14   17.56
   5   9  -6  197.25   23.73
  -4  -9   6  192.00   23.97
   4   9  -6  214.46   22.60
   3   9  -6  104.73   16.94
   2   9  -6   15.48    9.02
   1   9  -6  810.99   57.68
  -1  -9   6  871.09  100.55
   0   9  -6  132.40   12.36
   0  -9   6  132.12   42.91
   1  -9   6  147.16   37.59
   2  -9   6    1.92   18.05
   3  -9   6  262.64   39.74
   4  -9   6  -14.16   15.58
   5  -9   6  176.15   40.61
   6  -9   6  -12.63   20.67
   7  -9   6   -9.00   20.30
   8  -9   6   17.81   29.95
   9  -9   6  -11.48   28.41
  10  -9   6  -37.37   25.93
   9   8  -6  214.93   34.58
   8   8  -6   80.35   27.36
   7   8  -6  310.41   34.11
   6   8  -6   12.32   14.49
   5   8  -6  590.50   47.32
   4   8  -6  100.76   15.81
  -4  -8   6   78.36   14.13
   3   8  -6  210.80   19.97
   2   8  -6   69.11   12.44
  -1  -8   6    7.63   37.11
   0   8  -6   56.08    8.73
   0  -8   6   37.92   32.84
   1  -8   6   35.60   24.80
   2  -8   6  382.38   49.21
   3  -8   6   -6.85   13.78
   4  -8   6    1.98   17.26
   5  -8   6  -13.24   15.46
   6  -8   6   87.78   32.30
   7  -8   6   39.45   28.03
   8  -8   6  -27.90   23.12
   9  -8   6   -3.27   28.64
  10  -8   6  -46.78   26.20
  10   7  -6  -47.08   27.92
   9   7  -6    0.78   25.08
   8   7  -6  123.12   31.07
   7   7  -6   51.17   22.93
   6   7  -6  117.56   20.36
   5   7  -6    7.96   10.98
  -4  -7   6   82.61   14.54
   4   7  -6  126.02   16.42
   3   7  -6  624.61   46.06
   2   7  -6   -5.39    5.38
   1   7  -6    7.94    5.72
   0  -7   6   22.34   30.65
   2  -7   6   35.44   20.22
   3  -7   6  474.57   53.85
   4  -7   6    8.38   16.79
   5  -7   6   86.28   29.69
   6  -7   6   -2.47   15.95
   7  -7   6   99.72   37.55
   8  -7   6  -28.33   22.65
   9  -7   6  -26.71   23.70
  10  -7   6  -42.14   29.75
  10   6  -6  -43.75   28.12
   9   6  -6   72.43   31.97
   8   6  -6  173.51   27.24
   7   6  -6    4.02   17.59
   6   6  -6    6.29   12.63
   5   6  -6  292.07   28.51
   4   6  -6  726.71   53.67
   3   6  -6  201.26   18.91
   2   6  -6  748.64   52.30
   1   6  -6  211.83   17.21
   0  -6   6  471.00   34.98
   0  -6   6  507.93   66.05
   1  -6   6    9.89   19.01
   1  -6   6   -0.89   11.80
   2  -6   6 1458.84  122.24
   4  -6   6  383.19   46.55
   5  -6   6    3.11   18.55
   6  -6   6  255.00   40.10
   7  -6   6   -1.92   22.01
   8  -6   6    1.98   28.00
   9  -6   6  -40.23   23.54
  10  -6   6  -27.50   28.15
  10   5  -6   42.23   35.10
   9   5  -6  -23.17   19.64
   8   5  -6  168.31   32.98
   8   5  -6  126.67   25.37
   7   5  -6   -5.03   14.42
   6   5  -6  269.88   27.90
   5   5  -6  122.57   17.33
   4   5  -6  684.89   50.87
   3   5  -6    7.17    8.24
   2   5  -6  184.86   16.31
   1   5  -6  183.54   15.59
   0  -5   6  625.84   74.72
   0  -5   6  757.83   48.81
   1  -5   6  155.59   34.94
   1  -5   6  128.32   19.08
   2  -5   6   -3.94   12.56
   2  -5   6   -2.33   10.34
   3  -5   6   11.93    9.96
   3  -5   6   -3.33   12.32
   4  -5   6    9.62   14.13
   4  -5   6   12.00    9.68
   5  -5   6   21.60   19.01
   6  -5   6   46.62   25.32
   7  -5   6  -12.65   21.35
   8  -5   6   22.18   27.63
   9  -5   6  -43.88   24.89
  10  -5   6  -20.56   30.12
  11   4  -6  -34.93   30.65
  10   4  -6  -45.47   24.71
   9   4  -6  146.24   34.87
   9   4  -6  149.15   34.77
   8   4  -6   -3.71   15.79
   8   4  -6    0.75   19.41
   7   4  -6    6.45   16.77
   7   4  -6    1.27   13.94
   6   4  -6  109.74   21.10
   6   4  -6  103.77   17.53
   5   4  -6  493.83   40.20
   4   4  -6  455.49   36.19
   3   4  -6  318.67   26.07
   2   4  -6  662.47   46.63
   1   4  -6   58.63    7.43
   0  -4   6  854.62   59.38
   1  -4   6  135.76   31.51
   1  -4   6  101.84   17.87
   2  -4   6  386.68   43.98
   2  -4   6  365.73   33.01
   3  -4   6   26.68   18.51
   3  -4   6   51.61   16.25
   4  -4   6  475.81   52.58
   4  -4   6  511.85   40.92
   5  -4   6   80.87   18.04
   5  -4   6   44.54   22.41
   6  -4   6   75.39   29.18
   7  -4   6   52.47   28.13
   8  -4   6   19.88   27.00
   9  -4   6  -37.13   24.18
  10  -4   6  -35.53   26.92
  10   3  -6  -46.84   26.22
   9   3  -6  -12.86   23.46
   9   3  -6   17.23   23.21
   8   3  -6   28.18   20.07
   8   3  -6   41.55   22.87
   7   3  -6  108.36   22.81
   7   3  -6   60.37   21.87
   6   3  -6  122.16   21.89
   6   3  -6  100.02   17.13
   5   3  -6  232.26   23.95
   5   3  -6  256.14   30.15
   4   3  -6   82.67   13.23
   3   3  -6 1199.61   81.88
   2   3  -6  704.69   49.12
   1  -3   6 1344.28   95.82
   1  -3   6 1338.57  111.38
   2  -3   6   46.48   18.59
   2  -3   6   35.04   16.87
   3  -3   6  600.18   53.62
   3  -3   6  760.89   65.54
   4  -3   6  111.09   27.67
   4  -3   6  135.75   20.03
   5  -3   6  452.09   52.55
   5  -3   6  515.27   43.09
   6  -3   6   61.61   20.17
   6  -3   6   57.32   25.57
   7  -3   6  177.86   34.76
   8  -3   6  -31.90   18.54
   9  -3   6  -20.03   23.14
  11   2  -6   -4.90   30.36
  10   2  -6  -38.93   23.70
  10   2  -6   -2.35   24.14
   9   2  -6   55.91   29.21
   9   2  -6   75.33   29.40
   8   2  -6   75.33   24.86
   8   2  -6   82.89   29.76
   7   2  -6  537.94   47.28
   7   2  -6  568.09   56.38
   6   2  -6   12.99   12.54
   6   2  -6    4.91   12.42
   5   2  -6  205.01   26.08
   5   2  -6  185.37   20.95
   4   2  -6  332.63   28.68
   4   2  -6  355.55   34.78
   3   2  -6  895.04   62.42
   2   2  -6  574.12   40.63
  -1  -2   6  502.97   36.30
   0  -2   6  243.01   22.43
   1  -2   6   10.63   11.89
   1  -2   6    0.82   15.04
   2  -2   6  199.30   27.49
   2  -2   6  199.30   24.37
   3  -2   6  107.57   25.10
   3  -2   6  118.85   26.63
   4  -2   6   51.45   21.98
   4  -2   6   67.25   23.09
   5  -2   6  366.49   43.94
   5  -2   6  343.14   35.94
   6  -2   6  119.58   27.00
   6  -2   6  156.02   34.36
   7  -2   6   19.74   22.86
   7  -2   6   52.79   22.53
   8  -2   6   -8.43   22.47
   9  -2   6    7.43   26.34
  11   1  -6  -19.96   25.80
  11   1  -6  -40.28   26.47
  10   1  -6  109.53   34.35
  10   1  -6  156.66   42.77
   9   1  -6   12.71   21.86
   9   1  -6   14.60   24.27
   8   1  -6  264.30   30.97
   8   1  -6  253.47   39.38
   7   1  -6   55.11   20.77
   6   1  -6  561.80   52.84
   6   1  -6  529.23   44.57
   5   1  -6  490.89   45.35
   5   1  -6  448.90   38.08
   4   1  -6  474.77   37.50
   4   1  -6  484.53   43.09
   3   1  -6    4.88   10.10
   3   1  -6   22.25    8.33
   2   1  -6 1094.18   73.67
  -1  -1   6 1346.30   90.68
   0  -1   6   78.38   15.10
   1  -1   6  495.39   47.30
   1  -1   6  513.72   44.41
   2  -1   6  113.36   20.44
   2  -1   6  128.31   20.63
   3  -1   6  902.69   74.59
   3  -1   6 1011.05   81.62
   4  -1   6   63.43   21.51
   4  -1   6   81.72   24.97
   5  -1   6  741.18   67.08
   5  -1   6  632.56   57.94
   6  -1   6   86.90   28.87
   6  -1   6  105.60   29.44
   7  -1   6   46.31   20.66
   7  -1   6   39.14   23.81
   8  -1   6   22.76   24.44
   8  -1   6   22.11   29.90
   9  -1   6   28.63   27.71
  11   0  -6  -16.91   25.58
  11   0  -6  -22.89   23.23
  10   0  -6  -10.92   21.17
  10   0  -6  -11.11   21.96
   9   0  -6  -26.48   18.57
   9   0  -6  -19.42   18.77
   8   0  -6   10.16   18.65
   8   0  -6    0.47   18.58
   7   0  -6   10.65   15.54
   7   0  -6  -10.95   13.63
   6   0  -6  168.76   20.46
   6   0  -6  149.88   25.30
   5   0  -6   15.65   10.20
   5   0  -6    1.17    9.93
   4   0  -6  346.49   33.09
   4   0  -6  336.03   28.62
   3   0  -6  -10.03    4.95
   3   0  -6   -5.09    6.05
  -2   0   6 1014.95   72.58
   2   0  -6 1111.34   80.94
  -1   0   6   12.09    7.80
   1   0   6   23.43   17.49
   2   0   6  459.46   44.39
   2   0   6  476.09   44.16
   3   0   6   19.15   18.88
   4   0   6 2186.72  155.55
   4   0   6 1839.63  142.67
   5   0   6    9.40   16.33
   5   0   6   16.27   15.86
   6   0   6   84.39   26.81
   6   0   6  116.34   29.66
   7   0   6  -18.32   14.34
   7   0   6  -24.24   17.11
   8   0   6   50.05   27.85
   8   0   6   56.52   34.13
   9   0   6  -40.02   31.17
  11  -1  -6  -21.04   22.97
  11  -1  -6    0.41   24.20
  10  -1  -6  127.51   32.94
  10  -1  -6  125.34   36.87
   9  -1  -6   12.43   23.57
   9  -1  -6   29.10   19.77
   8  -1  -6  272.52   30.71
   8  -1  -6  215.11   34.92
   7  -1  -6   32.15   19.29
   7  -1  -6   57.31   19.64
   6  -1  -6  491.05   48.30
   6  -1  -6  488.85   41.04
   5  -1  -6  406.21   41.02
   5  -1  -6  456.79   36.15
   4  -1  -6  454.92   40.37
   4  -1  -6  440.09   35.13
   3  -1  -6   13.75    8.48
  -2   1   6 1363.66   91.50
   2  -1  -6 1329.52   98.64
  -1   1   6 1435.78   98.27
   0   1   6  114.72   22.70
   1   1   6  545.07   50.72
   2   1   6  177.24   22.55
   2   1   6  168.57   27.63
   3   1   6 1134.65   90.28
   3   1   6 1118.48   88.27
   4   1   6  180.49   27.08
   4   1   6  126.15   30.75
   5   1   6  776.95   67.26
   5   1   6  698.68   63.97
   6   1   6  112.89   25.96
   6   1   6   57.10   29.06
   7   1   6   25.03   24.80
   7   1   6   61.51   25.35
   8   1   6   22.23   26.83
   9   1   6   39.65   41.89
  10   1   6  -77.46   38.89
  11  -2  -6   55.64   32.92
  10  -2  -6   -8.25   18.59
  10  -2  -6   -7.94   24.04
   9  -2  -6   57.98   26.69
   9  -2  -6   62.01   23.79
   8  -2  -6  106.00   25.30
   8  -2  -6   65.82   26.88
   7  -2  -6  536.60   54.90
   7  -2  -6  572.20   47.31
   6  -2  -6   -1.86   10.69
   6  -2  -6   -3.77   12.13
   5  -2  -6  172.00   24.47
   5  -2  -6  192.20   20.38
   4  -2  -6  320.05   31.77
   4  -2  -6  329.56   28.15
  -3   2   6  849.84   57.98
   3  -2  -6  760.96   62.00
  -2   2   6  549.80   42.45
   2  -2  -6  575.67   44.72
  -1   2   6  510.80   44.18
   1  -2  -6  633.90   45.54
   0   2   6  162.85   30.15
   1   2   6    4.15   19.25
   2   2   6  222.06   30.75
   2   2   6  238.90   25.13
   3   2   6  134.84   31.38
   3   2   6  132.12   20.78
   4   2   6   27.88   21.31
   5   2   6  434.65   44.34
   5   2   6  450.00   46.75
   6   2   6  134.10   24.36
   6   2   6  120.05   33.51
   7   2   6   45.83   33.46
   7   2   6   92.84   27.08
   8   2   6  -29.12   29.72
   9   2   6  -22.89   31.40
  11  -3  -6  -17.41   22.30
  10  -3  -6   -0.92   17.89
  10  -3  -6  -14.59   18.45
   9  -3  -6   -4.13   17.50
   9  -3  -6   15.71   17.64
   8  -3  -6   37.08   22.09
   8  -3  -6   64.17   21.12
   7  -3  -6   69.58   20.17
   7  -3  -6   48.89   21.27
   6  -3  -6  101.53   23.02
   6  -3  -6  101.56   16.81
   5  -3  -6  235.27   23.33
   5  -3  -6  222.62   27.42
  -4   3   6   91.37   17.70
   4  -3  -6   63.54   14.76
  -3   3   6 1108.81   80.23
   3  -3  -6 1186.13   86.03
  -2   3   6  702.34   52.33
   1  -3  -6  616.66   48.86
  -1   3   6  669.53   51.85
   0   3   6   10.56   24.06
   1   3   6 1416.21  110.14
   2   3   6   93.33   14.48
   3   3   6 1058.10   79.95
   3   3   6  957.48   82.56
   4   3   6  111.17   31.27
   4   3   6  133.26   20.60
   5   3   6  512.78   53.21
   5   3   6  601.51   51.32
   6   3   6   70.50   29.23
   6   3   6   62.81   20.48
   7   3   6  220.97   38.80
   9   3   6   14.87   39.78
  11  -4  -6   -8.53   24.02
  10  -4  -6   -9.89   19.98
   9  -4  -6  158.84   37.09
   9  -4  -6  123.62   21.00
   8  -4  -6   -6.49   14.81
   8  -4  -6   21.40   16.20
   7  -4  -6   14.98   14.79
   7  -4  -6   10.01   15.92
   6  -4  -6  118.71   21.92
   5  -4  -6  507.62   45.81
  -5   4   6  474.80   41.01
  -4   4   6  450.74   35.39
   4  -4  -6  343.63   42.55
   4  -4  -6  397.31   36.74
   3  -4  -6  304.41   26.88
  -3   4   6  262.13   26.43
   3  -4  -6  259.15   34.18
   2  -4  -6  741.11   53.06
  -2   4   6  676.73   52.65
   2  -4  -6  631.35   66.81
  -1   4   6   46.46   22.87
   1  -4  -6   69.53   19.28
   1  -4  -6   67.72   10.16
   0   4   6  718.25   67.73
   0  -4  -6  782.85   75.93
  -1  -4  -6  184.33   29.47
   1   4   6  149.95   37.60
  -2  -4  -6  585.51   63.01
   2   4   6  549.64   56.28
   2   4   6  532.00   45.33
   3   4   6   36.82   11.96
   3   4   6   34.80   28.80
   4   4   6  556.38   57.66
   4   4   6  661.73   51.40
   5   4   6   48.54   28.22
   5   4   6   57.17   15.45
   6   4   6  112.69   39.15
   7   4   6   76.53   35.70
   8   4   6   12.61   37.93
   9   4   6  -58.62   32.10
  10   4   6  -70.58   34.96
  11  -5  -6  -27.16   21.76
  10  -5  -6   96.25   34.39
   9  -5  -6   10.84   18.63
   8  -5  -6  131.04   29.22
  -7   5   6  -15.67   12.97
   7  -5  -6   -7.60   14.65
  -6   5   6  274.84   29.02
   6  -5  -6  266.49   32.12
   5  -5  -6  107.39   19.91
  -5   5   6  133.77   19.33
  -4   5   6  721.65   53.04
   4  -5  -6  712.27   56.16
   4  -5  -6  590.96   65.43
   3  -5  -6   10.64   13.17
   3  -5  -6    9.54    8.77
  -2   5   6  148.23   23.34
   2  -5  -6  188.95   18.32
   2  -5  -6  189.36   26.91
  -1   5   6  240.44   32.63
   1  -5  -6  206.98   31.77
   1  -5  -6  247.70   21.21
   0  -5  -6  622.77   46.34
   0  -5  -6  630.71   63.39
   0   5   6  594.23   62.23
   1   5   6  146.65   40.52
   2   5   6   -4.92    6.89
  -2  -5  -6   -8.10   16.04
   3   5   6  -14.33   24.66
  -3  -5  -6   -6.80   16.43
   3   5   6    3.42    7.46
   4   5   6    9.34    8.26
   4   5   6   24.37   23.46
   5   5   6   14.61   30.05
   6   5   6   52.59   31.29
   7   5   6  -41.99   19.91
   8   5   6    1.93   34.22
  10  -6  -6   -9.09   19.77
   9  -6  -6   48.66   25.14
  -8   6   6  162.12   25.49
   8  -6  -6  158.94   28.93
   7  -6  -6   28.75   15.46
  -7   6   6   26.05   19.09
  -6   6   6   -0.82   13.99
   6  -6  -6   10.55   12.49
   5  -6  -6  279.99   30.80
  -5   6   6  259.76   28.16
   4  -6  -6  756.96   60.05
   4  -6  -6  721.01   70.72
  -4   6   6  717.49   57.08
   3  -6  -6  316.84   36.40
   3  -6  -6  297.36   28.45
   2  -6  -6  856.41   63.53
  -2   6   6  760.50   67.58
   2  -6  -6  903.02   79.79
  -1   6   6  285.12   48.06
   1  -6  -6  237.83   22.39
   1  -6  -6  250.58   33.04
   0   6   6  358.84   51.46
   0  -6  -6  529.24   52.50
   0  -6  -6  528.73   36.92
  -1  -6  -6   -6.52   11.43
   1   6   6  -55.17   27.32
   2   6   6 2343.69  168.75
  -2  -6  -6 2269.48  209.16
   2   6   6 2552.27  178.24
  -3  -6  -6  -13.69   14.10
   3   6   6  -33.20   18.77
  -4  -6  -6  382.13   56.93
   4   6   6  532.84   53.63
   5   6   6  -28.28   26.97
   6   6   6  356.97   47.42
   7   6   6  -34.35   26.00
   8   6   6  -26.99   38.13
  10  -7  -6   11.62   23.36
   9  -7  -6   -7.03   18.13
   8  -7  -6   87.24   27.34
   7  -7  -6   25.93   17.16
  -7   7   6   17.54   17.70
  -6   7   6  141.86   26.35
   6  -7  -6  103.21   20.39
  -5   7   6   11.46   15.64
   5  -7  -6   14.25   11.64
   4  -7  -6  112.08   22.36
  -4   7   6  120.22   21.30
   4  -7  -6   84.59   16.25
   3  -7  -6  619.47   51.11
   3  -7  -6  666.68   62.78
  -3   7   6  623.84   54.17
   2  -7  -6    5.23    9.00
   2  -7  -6    3.80    5.94
  -2   7   6  -29.03   16.22
   1  -7  -6   -1.08    9.36
   0  -7  -6   64.38   16.71
   0   7   6   31.99   33.35
   0  -7  -6   61.57    8.26
   1   7   6  776.61   77.91
  -1  -7  -6  865.53   80.16
   2   7   6   34.16   29.61
  -2  -7  -6   32.79   16.48
   3   7   6  637.38   63.25
  -3  -7  -6  540.67   63.56
   4   7   6  -24.78   21.12
  -4  -7  -6   -8.54   17.69
  -5  -7  -6   67.53   28.73
   5   7   6  101.14   36.58
   6   7   6   -0.70   27.40
   7   7   6   73.10   41.30
   8   7   6  -40.62   32.03
  10  -8  -6  -10.12   20.29
   9  -8  -6  181.49   32.98
   8  -8  -6   88.46   27.27
   7  -8  -6  335.40   39.38
  -6   8   6   14.93   16.87
   6  -8  -6    5.00   12.67
   5  -8  -6  623.06   54.03
  -5   8   6  609.01   51.34
  -4   8   6  135.51   28.97
   4  -8  -6   97.40   22.15
   4  -8  -6   90.44   16.44
   3  -8  -6  219.85   22.53
  -3   8   6  180.94   32.17
   3  -8  -6  217.42   28.18
  -2   8   6   84.80   33.26
   2  -8  -6   75.55   13.32
   2  -8  -6   71.53   18.10
  -1   8   6  155.72   44.18
   1  -8  -6   89.68   20.23
   0  -8  -6   63.12   17.44
   0   8   6   55.73   37.24
   1   8   6  -28.27   32.09
  -2  -8  -6  442.36   50.06
   2   8   6  437.64   56.33
   3   8   6  -23.28   23.36
  -3  -8  -6   15.08   16.03
  -4  -8  -6  -13.89   14.47
   4   8   6  -18.76   28.40
  -5  -8  -6  -22.18   17.14
   5   8   6  -25.60   22.02
   6   8   6   64.33   43.90
   7   8   6    9.46   37.50
   8   8   6  -24.31   35.87
  10  -9  -6   17.71   27.26
   9  -9  -6  -12.24   15.88
   8  -9  -6  177.38   35.36
   7  -9  -6    9.49   13.57
   6  -9  -6   22.58   14.95
  -5   9   6  148.77   24.90
   5  -9  -6  183.45   23.40
   4  -9  -6  204.77   23.58
  -4   9   6  190.34   31.28
   4  -9  -6  221.13   29.60
   3  -9  -6   97.61   21.10
  -3   9   6  133.16   35.23
   3  -9  -6   76.08   14.15
   2  -9  -6    8.15    7.83
  -2   9   6  -22.69   27.38
   2  -9  -6    4.54    9.77
   1  -9  -6  822.86   67.26
  -1   9   6 1071.44   92.52
   1  -9  -6  855.27   85.64
   0  -9  -6  162.43   17.31
   0  -9  -6  174.65   27.01
   0   9   6  249.50   54.21
  -1  -9  -6  175.95   27.60
   1   9   6  193.60   47.73
  -2  -9  -6   46.52   17.69
   2   9   6    6.01   34.06
  -3  -9  -6  322.42   44.31
   3   9   6  349.90   49.81
   4   9   6  -12.46   25.87
  -4  -9  -6   16.57   17.72
  -5  -9  -6  164.59   40.17
   5   9   6  301.47   59.41
  -6  -9  -6   -1.73   22.03
   6   9   6  -39.33   26.95
   7   9   6  -25.89   39.80
   8   9   6  -23.63   45.11
   9 -10  -6   -6.51   17.19
   8 -10  -6   12.68   17.13
   7 -10  -6   37.77   19.37
   6 -10  -6  104.33   22.99
   5 -10  -6   -0.07    9.94
   4 -10  -6  253.14   27.26
  -4  10   6  241.76   34.61
   4 -10  -6  265.12   33.40
   3 -10  -6   66.44   14.34
   3 -10  -6   48.46   15.59
  -3  10   6    1.57   33.11
   2 -10  -6  404.35   36.72
   2 -10  -6  457.14   48.84
  -2  10   6  484.73   58.93
  -1  10   6  -37.03   29.44
   1 -10  -6   -9.35    5.22
   1 -10  -6   -5.95    9.13
   0 -10  -6 1028.84  100.16
   0 -10  -6  977.66   77.75
   0  10   6 1241.28  101.12
   1  10   6  -23.62   25.76
  -1 -10  -6   -3.40   11.89
  -2 -10  -6  827.18   79.95
   2  10   6  776.57   77.85
   3  10   6   51.25   35.34
  -3 -10  -6   74.35   22.41
   4  10   6  620.11   68.18
  -4 -10  -6  573.77   66.40
   5  10   6   19.44   40.14
  -5 -10  -6   33.61   21.40
  -6 -10  -6  212.23   43.19
   6  10   6  272.84   47.15
   7  10   6  -55.43   34.18
   8  10   6   35.44   50.86
   9  10   6  -52.20   37.46
   9 -11  -6  -10.67   16.15
   8 -11  -6  100.92   29.01
   7 -11  -6   12.06   14.11
   6 -11  -6  135.16   22.93
   5 -11  -6   14.73   13.08
   4 -11  -6  108.22   20.76
   4 -11  -6   87.71   22.61
   3 -11  -6   -3.02   10.63
   3 -11  -6    1.88    7.90
   2 -11  -6  424.88   50.63
  -2  11   6  603.02   66.67
   2 -11  -6  434.52   39.75
  -1  11   6   -7.92   36.40
   1 -11  -6    5.31   13.02
   1 -11  -6   11.89    8.10
   0  11   6   -7.28   32.74
   0 -11  -6   27.38   15.39
  -1 -11  -6  239.80   35.16
   1  11   6  325.16   60.22
  -2 -11  -6   66.78   21.32
   2  11   6   77.94   41.72
   3  11   6  164.32   45.73
  -3 -11  -6  153.45   29.10
  -4 -11  -6   -6.57   14.23
   4  11   6  -13.25   30.45
  -5 -11  -6   21.28   20.29
   5  11   6  -14.20   38.84
  -6 -11  -6   32.27   24.59
   6  11   6  -12.44   44.50
   7  11   6  -33.29   43.94
   8  11   6  -68.55   38.78
   9 -12  -6   31.30   25.43
   8 -12  -6   -3.62   17.78
   7 -12  -6  141.70   25.55
   6 -12  -6   19.94   15.35
   5 -12  -6   77.39   19.89
   4 -12  -6   -3.42    8.97
   4 -12  -6   -8.60   12.97
   3 -12  -6  145.72   19.20
   3 -12  -6  138.79   25.70
   2 -12  -6  116.10   23.45
   2 -12  -6  104.59   14.57
  -1  12   6  364.00   50.42
   1 -12  -6  241.55   35.74
   0 -12  -6  139.19   24.78
   0  12   6  141.59   50.61
  -1 -12  -6    6.63   13.41
   1  12   6  -24.85   26.36
   2  12   6  -61.24   30.29
  -2 -12  -6   -0.23   13.01
   3  12   6   10.45   30.74
  -3 -12  -6   25.22   19.42
  -4 -12  -6   71.51   24.71
   4  12   6   26.81   41.79
   5  12   6   25.31   44.52
  -5 -12  -6   43.86   25.35
  -6 -12  -6   10.57   22.90
   7  12   6  -37.29   39.37
   8  12   6  -58.54   49.24
   9  12   6  -86.11   43.80
   9 -13  -6  -12.19   18.77
   8 -13  -6   14.60   20.22
   7 -13  -6   43.07   20.46
   6 -13  -6   13.36   15.11
   5 -13  -6  189.58   25.18
   4 -13  -6    6.78   11.02
   4 -13  -6    1.57   14.98
   3 -13  -6  123.06   24.73
   3 -13  -6  123.91   18.10
   2 -13  -6   84.86   22.85
   1 -13  -6  914.41   88.75
   0 -13  -6   -3.32   13.60
   0  13   6   20.89   34.95
   1  13   6  297.84   48.83
  -1 -13  -6  285.91   38.74
  -2 -13  -6   26.61   17.01
   2  13   6  -24.82   31.78
  -3 -13  -6  581.70   64.20
   3  13   6  566.01   65.50
  -4 -13  -6   11.75   17.38
   4  13   6  -16.91   33.54
   5  13   6  203.82   57.39
  -5 -13  -6  194.70   38.34
   6  13   6  -74.22   42.06
  -6 -13  -6    6.21   22.63
   7  13   6   -5.59   47.83
   8 -14  -6   -1.30   17.38
   7 -14  -6   22.96   17.89
   6 -14  -6   23.72   16.65
   5 -14  -6   70.53   18.94
   4 -14  -6   10.36   12.32
   4 -14  -6   11.22   16.21
   3 -14  -6   39.15   19.87
   2 -14  -6   58.40   20.90
   1 -14  -6  140.69   27.38
   0 -14  -6  265.14   37.71
   1  14   6   45.25   38.13
  -1 -14  -6   33.14   17.88
  -2 -14  -6   43.26   20.06
   2  14   6   43.32   40.87
  -3 -14  -6   -2.73   16.67
   3  14   6   16.89   31.95
  -4 -14  -6  143.45   31.83
   4  14   6  175.86   57.49
  -5 -14  -6   13.48   21.63
   5  14   6  -57.85   42.30
  -6 -14  -6   -7.26   21.26
   8 -15  -6   92.16   30.01
   7 -15  -6    0.33   17.32
   6 -15  -6  134.57   27.58
   5 -15  -6   -0.26   11.07
   4 -15  -6   44.07   20.58
   3 -15  -6   11.35   14.41
   2 -15  -6  112.76   25.41
   1 -15  -6    8.13   16.24
   0 -15  -6   35.81   19.56
  -1 -15  -6   30.04   17.61
  -2 -15  -6   50.59   22.54
   2  15   6   53.31   43.35
  -3 -15  -6    8.94   16.36
   3  15   6    9.06   35.04
   4  15   6  -26.52   39.79
  -4 -15  -6   18.09   21.61
   5  15   6   -7.41   40.06
  -5 -15  -6   -2.96   21.80
  -6 -15  -6   38.26   27.36
   6  15   6  -43.29   43.08
   7  15   6 -100.57   52.17
   6 -16  -6   26.23   17.15
   4 -16  -6  100.54   27.82
   3 -16  -6    0.18   15.64
   2 -16  -6   52.92   20.32
   1 -16  -6    2.30   14.93
   0 -16  -6  143.33   28.63
  -1 -16  -6   22.12   17.72
  -2 -16  -6  202.36   34.67
  -3 -16  -6    7.58   19.24
   3  16   6  -14.76   35.83
  -4 -16  -6  126.91   32.83
   4  16   6  147.21   59.62
   5  16   6  -58.83   47.51
  -5 -16  -6   18.96   24.52
  -6 -16  -6  151.26   39.67
   6  16   6   63.40   63.75
   4 -17  -6   66.95   25.67
   3 -17  -6  122.16   27.11
   2 -17  -6    2.40   16.10
   1 -17  -6   94.40   27.11
   0 -17  -6   64.47   23.03
  -1 -17  -6  180.45   31.96
  -2 -17  -6   -3.64   16.93
  -3 -17  -6  160.75   33.18
  -4 -17  -6   -7.61   17.60
   4  17   6  -77.31   43.56
   5  17   6   50.48   57.92
  -5 -17  -6   86.67   31.59
   6  17   6  -48.82   46.97
  -6 -17  -6    7.14   24.88
   4 -18  -6   19.33   18.15
   3 -18  -6   34.67   21.78
   2 -18  -6    9.96   16.34
   1 -18  -6   10.71   16.79
   0 -18  -6    1.97   18.26
  -1 -18  -6   67.36   25.44
  -2 -18  -6    3.60   15.71
  -3 -18  -6   10.77   19.01
  -4 -18  -6    7.67   19.57
   5  18   6  -60.09   48.12
  -5 -18  -6   -6.53   20.15
  -6 -18  -6    7.50   24.44
   2 -19  -6    9.46   17.76
   1 -19  -6   38.32   21.60
   0 -19  -6    2.03   16.40
  -1 -19  -6   61.24   23.98
  -2 -19  -6   -1.74   18.18
  -3 -19  -6   23.97   20.82
  -4 -19  -6   -8.04   20.63
  -5 -19  -6   26.81   25.10
   3 -20  -6    4.96   20.92
   2 -20  -6   90.55   30.46
   1 -20  -6    7.39   20.35
   0 -20  -6   98.38   29.64
  -1 -20  -6   -3.74   17.98
  -2 -20  -6  109.35   31.14
  -3 -20  -6   -0.01   20.99
   1 -21  -6   10.20   20.60
   0 -21  -6   13.28   19.63
  -3 -20   7   -5.36   16.92
  -2 -20   7   10.11   19.95
  -1 -20   7  -13.71   19.93
   0 -20   7   22.31   22.26
   1 -20   7  -13.33   20.51
   2 -20   7  -10.93   18.48
   3 -20   7   14.24   18.40
  -4 -19   7   -5.19   14.84
  -3 -19   7   80.84   25.36
  -2 -19   7   -5.05   15.75
  -1 -19   7   13.27   18.70
   0 -19   7   -7.01   16.83
   1 -19   7   57.07   25.32
   2 -19   7   16.28   22.50
   3 -19   7    4.84   19.75
   4 -19   7   -5.80   18.31
   4 -19   7    8.85   31.36
  -4 -18   7  138.31   25.06
  -3 -18   7   -0.33   14.37
  -2 -18   7  165.89   29.49
  -1 -18   7   -3.39   15.62
   0 -18   7  108.64   30.98
   1 -18   7    3.16   20.71
   2 -18   7  256.74   41.03
   3 -18   7   -4.58   26.64
   3 -18   7    2.56   16.50
   4 -18   7   12.78   30.26
   4 -18   7   20.08   19.96
   5 -18   7   -9.14   14.87
   5 -18   7  -17.77   25.32
  -4 -17   7    0.81   13.37
  -3 -17   7   72.70   21.82
  -2 -17   7   -5.84   12.74
  -1 -17   7    4.29   16.80
   0 -17   7  -16.64   13.96
   1 -17   7  101.47   28.44
   2 -17   7   47.48   28.42
   3 -17   7   42.81   28.70
   4 -17   7   32.31   33.12
   5 -17   7  -11.69   31.51
   6 -17   7  -15.05   29.09
  -4 -16   7   15.10   13.64
  -3 -16   7   11.88   13.89
  -2 -16   7    0.17   13.81
  -1 -16   7  -10.84   11.97
   0 -16   7   38.36   21.48
   1 -16   7   11.85   20.31
   2 -16   7   11.52   24.75
   3 -16   7   68.88   34.39
   4 -16   7    7.57   31.85
   5 -16   7   13.24   32.26
   6 -16   7  -27.08   27.70
   7 -16   7  -18.40   33.13
   7  15  -7   26.26   30.70
   6  15  -7  -27.69   18.80
  -4 -15   7   27.74   14.52
  -3 -15   7  146.00   24.42
  -2 -15   7   29.77   16.64
  -1 -15   7  370.50   44.82
   0 -15   7   45.45   26.45
   1 -15   7  211.05   46.17
   2 -15   7    5.49   21.32
   3 -15   7  141.44   42.21
   4 -15   7  -12.74   25.49
   5 -15   7   32.29   35.01
   6 -15   7  -21.68   27.35
   7 -15   7  -32.89   32.35
   7  14  -7   95.61   34.88
   6  14  -7   52.64   26.40
   5  14  -7    9.92   17.70
  -4 -14   7   68.35   17.46
  -3 -14   7   10.25   12.71
  -2 -14   7  134.18   23.05
   0 -14   7  186.86   45.28
   1 -14   7  125.54   38.93
   2 -14   7  108.54   36.25
   3 -14   7   -1.01   23.37
   4 -14   7   75.54   35.29
   5 -14   7   77.22   38.60
   6 -14   7   -8.39   26.81
   7 -14   7  -41.00   26.47
   8 -14   7  -36.32   30.22
   8  13  -7   56.64   35.09
   7  13  -7   -9.72   20.44
   6  13  -7  143.19   25.04
   5  13  -7   24.15   17.53
   4  13  -7   60.38   18.88
  -4 -13   7   42.12   13.96
  -3 -13   7   -6.84   10.04
  -1 -13   7   34.40   30.23
   0 -13   7   55.63   32.85
   1 -13   7   -2.74   19.18
   2 -13   7   43.25   28.94
   3 -13   7    2.68   23.33
   4 -13   7  150.30   46.67
   5 -13   7    6.32   27.63
   6 -13   7   42.73   34.39
   7 -13   7  -24.37   23.58
   8 -13   7  -24.78   27.39
   8  12  -7  -29.40   21.70
   7  12  -7   13.83   21.75
   6  12  -7  152.94   24.77
   5  12  -7   13.37   14.39
   4  12  -7  216.73   24.08
  -4 -12   7  191.99   25.26
   3  12  -7   -1.47    9.65
  -2 -12   7  203.65   45.79
  -1 -12   7  -23.05   27.07
   0 -12   7  627.72   78.84
   1 -12   7  114.67   40.83
   2 -12   7   27.24   28.46
   3 -12   7   11.05   23.65
   4 -12   7   94.01   37.44
   5 -12   7   15.80   28.86
   6 -12   7  -35.60   20.13
   7 -12   7  -42.01   22.32
   8 -12   7  -31.15   24.27
   9  11  -7    0.30   34.28
   8  11  -7  -13.61   22.86
   7  11  -7   91.97   28.19
   6  11  -7  -10.49   14.98
   5  11  -7  519.70   44.18
  -4 -11   7   36.45   12.99
   4  11  -7   48.86   16.71
  -2 -11   7  -11.70   22.10
   2  11  -7    2.87    8.23
  -1 -11   7 1023.17  110.23
   0 -11   7   22.24   33.98
   1 -11   7  274.85   51.60
   2 -11   7    9.84   24.44
   3 -11   7  150.89   41.65
   4 -11   7   19.62   23.73
   5 -11   7  179.28   45.13
   6 -11   7  -18.11   22.50
   7 -11   7  -30.66   22.79
   8 -11   7  -37.17   25.56
   9 -11   7  -26.23   29.32
   9  10  -7   61.05   33.54
   8  10  -7    7.42   27.19
   7  10  -7   64.44   24.86
   6  10  -7   19.42   18.71
   5  10  -7   42.43   17.30
  -4 -10   7   -1.11    7.67
   4  10  -7  -11.23    8.32
   3  10  -7    0.46    8.83
  -2 -10   7  -24.08   17.68
   2  10  -7   -6.30    7.83
  -1 -10   7    8.41   32.17
   1  10  -7   -0.93    7.53
   0 -10   7   46.14   34.77
   1 -10   7   22.26   29.34
   2 -10   7   86.58   34.72
   3 -10   7   28.56   25.42
   4 -10   7   17.27   24.41
   5 -10   7  106.44   36.60
   6 -10   7  -13.50   21.74
   7 -10   7   62.48   35.91
   8 -10   7  -32.12   25.24
   9 -10   7  -39.34   29.26
  10   9  -7   10.53   32.83
   9   9  -7  -13.00   28.13
   8   9  -7   33.49   25.03
   7   9  -7  124.04   30.60
   6   9  -7  120.57   24.91
   5   9  -7   60.36   17.36
   4   9  -7   -4.57   10.20
  -4  -9   7   -5.98    6.47
   3   9  -7  348.81   29.71
   2   9  -7   48.20   11.17
  -1  -9   7   53.83   38.18
   1   9  -7   58.15   10.02
   0  -9   7   13.74   37.25
   1  -9   7  337.58   55.12
   2  -9   7  -11.04   19.51
   3  -9   7  197.08   43.82
   4  -9   7   -2.28   18.77
   5  -9   7  -14.72   17.68
   6  -9   7   64.80   31.53
   7  -9   7    4.41   25.43
   9  -9   7  -41.24   25.94
  10   8  -7  -38.46   31.40
   9   8  -7   54.21   30.15
   8   8  -7  220.89   32.51
   7   8  -7    9.07   16.49
   6   8  -7  588.57   49.86
   5   8  -7   93.02   17.02
   4   8  -7  892.47   65.03
   3   8  -7   -5.00    7.52
   2   8  -7  673.77   48.30
  -1  -8   7   -2.25   32.85
   1   8  -7   15.40    7.24
   0  -8   7  841.78   57.68
   0  -8   7  817.10   99.73
   1  -8   7   -1.61   21.93
   2  -8   7  825.04   85.82
   3  -8   7  113.97   34.44
   4  -8   7  338.18   47.18
   5  -8   7  -24.04   18.34
   6  -8   7  136.99   39.57
   7  -8   7   -0.70   25.88
   8  -8   7  -23.84   20.69
   9  -8   7  -32.16   27.24
  10  -8   7  -52.24   29.60
  10   7  -7   -7.14   34.18
   9   7  -7   24.45   29.04
   8   7  -7  211.34   29.99
   7   7  -7  121.54   21.96
   6   7  -7  108.79   23.77
   5   7  -7   84.98   19.23
   4   7  -7  354.22   30.92
   3   7  -7  116.36   14.21
   2   7  -7   64.39   10.41
   1   7  -7  151.94   14.09
   0  -7   7  -26.16   27.38
   0  -7   7    3.02    7.46
   1  -7   7    7.30   12.60
   1  -7   7   18.89   23.25
   2  -7   7  161.90   38.25
   3  -7   7   63.72   24.31
   4  -7   7  163.52   32.00
   5  -7   7   -5.21   20.47
   6  -7   7   22.47   26.54
   8  -7   7   40.41   31.35
   9  -7   7  -35.35   23.83
  10   6  -7  -28.88   23.85
   9   6  -7  155.76   38.25
   8   6  -7  127.67   29.58
   7   6  -7   64.30   21.34
   6   6  -7   52.70   18.15
   5   6  -7  370.88   32.84
   4   6  -7  341.63   29.52
   3   6  -7   98.65   12.96
   2   6  -7  427.57   32.05
   1   6  -7   47.76    7.84
   0  -6   7  192.70   48.63
   0  -6   7  208.57   18.61
   1  -6   7   24.49   14.89
   1  -6   7   34.36   26.76
   2  -6   7  238.55   39.66
   2  -6   7  300.40   26.43
   3  -6   7  279.72   40.50
   4  -6   7   -5.42   15.60
   5  -6   7   31.62   23.74
   6  -6   7    9.69   22.13
   7  -6   7   76.04   34.88
   8  -6   7  -32.07   20.58
  10   5  -7  -51.50   26.60
   9   5  -7   45.98   29.18
   8   5  -7   19.06   18.25
   7   5  -7  158.74   30.05
   6   5  -7   35.73   15.05
   5   5  -7  224.62   24.55
   4   5  -7   81.37   13.89
   3   5  -7 1804.70  120.94
   2   5  -7  155.76   15.25
   1   5  -7  909.49   61.44
   0  -5   7   69.82   13.32
   0  -5   7   31.21   26.67
   1  -5   7 2136.81  169.29
   1  -5   7 1902.50  137.94
   2  -5   7   -7.32   17.24
   2  -5   7   14.47   13.47
   3  -5   7  666.16   67.73
   3  -5   7  689.79   54.28
   4  -5   7   63.88   16.92
   4  -5   7   21.80   19.99
   5  -5   7   55.65   26.52
   6  -5   7   -9.81   19.62
   7  -5   7   46.88   33.37
   8  -5   7  -28.61   19.43
  10  -5   7  -44.84   29.67
  11   4  -7  -30.40   33.07
   9   4  -7   49.87   27.87
   9   4  -7   81.21   28.68
   8   4  -7  221.57   34.32
   8   4  -7  256.50   31.10
   7   4  -7  146.71   26.95
   7   4  -7  112.84   27.15
   6   4  -7    3.53   12.21
   5   4  -7   57.03   16.55
   4   4  -7  821.41   59.59
   3   4  -7  174.52   17.33
   2   4  -7 1509.42  100.70
  -1  -4   7    4.14    6.96
   0  -4   7 1033.73   72.06
   1  -4   7  196.54   25.85
   1  -4   7  214.60   35.40
   2  -4   7 2376.21  169.94
   2  -4   7 2640.64  195.34
   3  -4   7   -1.20   14.43
   3  -4   7   -3.33   15.52
   4  -4   7  114.77   24.09
   4  -4   7   36.67   21.47
   5  -4   7  175.28   37.77
   5  -4   7  173.39   23.87
   6  -4   7  395.49   52.16
   7  -4   7  165.13   42.21
   8  -4   7  -16.44   25.62
   9  -4   7    5.15   30.08
  10   3  -7   20.45   29.58
  10   3  -7   64.87   29.00
   9   3  -7   11.42   25.69
   9   3  -7   29.80   22.86
   8   3  -7  120.78   29.80
   8   3  -7  109.56   29.93
   7   3  -7    3.84   15.48
   7   3  -7    5.02   14.04
   6   3  -7  125.54   24.49
   6   3  -7  138.97   19.35
   5   3  -7  616.97   58.48
   5   3  -7  644.76   49.14
   4   3  -7  146.81   17.42
   3   3  -7   28.70    9.92
   2   3  -7  160.87   15.01
  -1  -3   7 1260.68   85.27
   0  -3   7  391.86   32.27
   1  -3   7   38.79   18.19
   1  -3   7   37.38   18.51
   2  -3   7  132.45   26.01
   2  -3   7  107.99   27.68
   3  -3   7  248.21   30.89
   3  -3   7  309.05   38.04
   4  -3   7  139.85   23.49
   4  -3   7  139.15   31.68
   5  -3   7  137.34   29.71
   5  -3   7   93.04   29.28
   6  -3   7  194.35   41.64
   6  -3   7  201.99   29.46
   7  -3   7  -23.52   17.41
   8  -3   7   82.17   37.81
   9  -3   7  -15.45   29.51
  10  -3   7  -30.48   29.13
  11   2  -7  -29.90   27.50
  10   2  -7   31.54   26.99
  10   2  -7   22.13   29.36
   9   2  -7   50.19   26.76
   9   2  -7   70.98   26.24
   8   2  -7  122.58   27.13
   8   2  -7   73.25   29.02
   7   2  -7   26.50   17.16
   7   2  -7   -2.36   14.98
   6   2  -7  289.13   28.61
   6   2  -7  274.74   34.36
   5   2  -7  106.21   21.23
   5   2  -7  137.83   17.35
   4   2  -7  738.77   60.23
   4   2  -7  622.91   50.01
   3   2  -7  243.87   22.01
   2   2  -7 1313.67   88.07
  -1  -2   7  180.50   17.94
   0  -2   7  836.66   61.22
   1  -2   7   10.06   18.50
   1  -2   7    7.31   12.62
   2  -2   7  480.48   44.99
   2  -2   7  511.15   51.31
   3  -2   7  -22.30   15.29
   3  -2   7   -3.42   11.75
   4  -2   7  625.59   55.44
   4  -2   7  645.28   63.14
   5  -2   7   -9.57   15.85
   5  -2   7   -5.50   15.45
   6  -2   7   52.81   25.58
   6  -2   7   66.31   26.47
   7  -2   7    6.89   25.55
   7  -2   7   16.69   24.91
   8  -2   7  -14.13   22.42
   9  -2   7  -20.43   22.22
  11   1  -7   -1.32   26.85
  11   1  -7  -17.63   24.17
  10   1  -7   14.49   26.87
  10   1  -7   20.78   26.07
   9   1  -7  143.42   36.90
   9   1  -7  119.90   32.34
   8   1  -7   25.92   21.05
   8   1  -7   32.33   23.53
   7   1  -7  307.87   38.42
   7   1  -7  259.52   29.70
   6   1  -7  356.01   39.34
   6   1  -7  334.77   32.08
   5   1  -7  884.45   65.28
   5   1  -7  894.59   74.53
   4   1  -7   92.28   17.29
   4   1  -7   89.15   15.66
   3   1  -7 1642.67  123.81
   3   1  -7 1664.68  111.07
  -2  -1   7  902.60   62.79
  -1  -1   7 2785.46  183.80
   0  -1   7  548.42   44.24
   1  -1   7  568.54   51.66
   2  -1   7  140.44   31.01
   2  -1   7  113.27   21.87
   3  -1   7  641.06   58.46
   3  -1   7  567.74   53.91
   4  -1   7   -0.61   18.82
   4  -1   7    4.47   15.25
   5  -1   7  371.60   40.30
   5  -1   7  319.46   42.94
   6  -1   7  229.19   43.30
   6  -1   7  197.13   34.75
   7  -1   7    9.87   27.85
   7  -1   7   38.01   27.71
   8  -1   7  -32.23   20.01
   8  -1   7  -14.50   24.51
   9  -1   7  -26.00   27.67
  11   0  -7  112.41   39.55
  11   0  -7   62.62   32.32
  10   0  -7   -6.00   24.37
  10   0  -7  -11.12   24.44
   9   0  -7  104.60   29.15
   9   0  -7   99.99   32.95
   8   0  -7  -15.02   17.93
   8   0  -7   -8.92   14.67
   7   0  -7  332.81   32.85
   7   0  -7  315.98   39.96
   6   0  -7   31.46   14.93
   6   0  -7   12.38   14.37
   5   0  -7  177.92   21.06
   5   0  -7  178.02   24.62
   4   0  -7   -2.78    7.75
   4   0  -7  -11.78    6.68
   1   0   7  806.00   68.42
   2   0   7   27.28   18.95
   2   0   7   -4.67   10.77
   3   0   7   75.22   27.36
   3   0   7   75.97   20.19
   4   0   7   -9.82   13.37
   5   0   7  356.29   42.25
   5   0   7  270.28   37.13
   6   0   7  -12.06   16.58
   6   0   7   -5.90   24.02
   7   0   7  282.23   42.60
   7   0   7  274.12   40.78
   8   0   7  -36.20   18.54
   9   0   7   17.52   40.53
  11  -1  -7   -3.65   26.21
  11  -1  -7    1.81   25.29
  10  -1  -7   22.72   22.02
  10  -1  -7   25.09   27.53
   9  -1  -7  108.91   33.26
   9  -1  -7  148.38   30.17
   8  -1  -7    7.31   18.92
   8  -1  -7   11.10   18.16
   7  -1  -7  170.88   23.24
   7  -1  -7  150.78   28.00
   6  -1  -7  303.04   36.13
   6  -1  -7  338.43   31.01
   5  -1  -7  899.15   74.07
   5  -1  -7  895.91   65.88
   4  -1  -7   67.79   14.66
   4  -1  -7   56.86   13.97
  -3   1   7 1536.09  104.74
   3  -1  -7 1543.66  113.86
   2  -1  -7  842.26   64.99
  -2   1   7  827.16   59.54
  -1   1   7 2634.11  175.89
   0   1   7  478.29   43.34
   1   1   7  428.15   45.60
   2   1   7  109.18   19.67
   2   1   7  160.86   33.79
   3   1   7  728.54   65.67
   3   1   7  745.77   65.29
   4   1   7   -1.49   13.13
   4   1   7  -36.55   19.46
   5   1   7  366.19   44.43
   5   1   7  441.22   46.85
   6   1   7  236.30   44.74
   6   1   7  187.10   31.30
   7   1   7   33.68   28.21
   7   1   7   53.90   24.52
   8   1   7  -37.44   31.87
   9   1   7  -36.82   27.31
  11  -2  -7  -18.23   24.64
  11  -2  -7   -7.66   21.30
  10  -2  -7   55.70   25.29
  10  -2  -7   28.02   27.14
   9  -2  -7   63.75   23.87
   9  -2  -7   62.36   29.78
   8  -2  -7   53.44   24.44
   8  -2  -7   92.48   24.37
   7  -2  -7    0.44   13.14
   7  -2  -7    9.95   15.04
   6  -2  -7  301.13   28.67
   6  -2  -7  241.92   31.76
   5  -2  -7  115.84   22.26
   5  -2  -7  131.57   17.55
   4  -2  -7  625.36   52.37
  -4   2   7  614.82   47.44
  -3   2   7  189.39   19.87
   2  -2  -7 1577.40  112.39
  -2   2   7 1501.69  105.35
  -1   2   7  166.32   20.98
   0   2   7 1829.06  131.52
   1   2   7   22.30   21.05
   2   2   7  534.66   47.17
   2   2   7  528.07   54.25
   3   2   7   19.23   12.97
   3   2   7   14.72   20.54
   4   2   7  872.83   70.42
   4   2   7  712.74   69.98
   5   2   7   26.80   26.59
   5   2   7   14.14   15.96
   6   2   7   45.57   33.25
   6   2   7   76.28   23.06
   7   2   7    3.55   31.88
   8   2   7  -57.82   27.25
   9   2   7  -60.66   35.71
  10   2   7  -79.82   36.71
  11  -3  -7  -11.91   24.63
  10  -3  -7   55.68   30.00
  10  -3  -7   57.29   23.58
   9  -3  -7   48.24   20.50
   9  -3  -7   12.26   22.59
   8  -3  -7   96.24   28.32
   8  -3  -7  101.25   24.30
   7  -3  -7   -4.09   13.47
   7  -3  -7   18.06   15.33
   6  -3  -7  114.49   21.46
   6  -3  -7  113.99   17.41
   5  -3  -7  592.60   52.85
  -5   3   7  605.18   48.21
  -4   3   7  108.39   17.47
   4  -3  -7  118.58   17.58
  -3   3   7    6.02   11.27
   3  -3  -7   27.79    9.89
  -2   3   7  179.00   20.66
  -1   3   7 1355.12   94.39
   1  -3  -7 1221.59   93.98
   0   3   7  397.35   44.45
   1   3   7   39.05   27.82
   2   3   7  159.11   36.41
   2   3   7  117.55   18.37
   3   3   7  406.01   46.22
   3   3   7  381.96   39.93
   4   3   7  201.27   27.23
   4   3   7  166.52   42.50
   5   3   7  127.35   22.67
   5   3   7   79.46   30.41
   6   3   7  220.09   46.10
   6   3   7  202.38   30.07
   8   3   7   34.68   41.21
   9   3   7  -66.36   36.59
  10   3   7  -48.11   44.19
  11  -4  -7   13.33   25.51
  10  -4  -7   -8.38   21.60
   9  -4  -7   46.12   25.86
   8  -4  -7  227.55   33.95
   7  -4  -7  127.93   28.23
   6  -4  -7   -5.44   11.45
  -6   4   7    6.59   14.47
  -5   4   7   43.28   15.76
   5  -4  -7   36.71   15.58
   4  -4  -7  787.92   64.66
  -4   4   7  828.46   61.13
   3  -4  -7  212.73   19.99
   3  -4  -7  133.26   26.64
  -3   4   7  175.50   21.76
  -2   4   7 1511.54  106.82
   1  -4  -7    2.96   13.16
   1  -4  -7   11.60    7.78
  -1   4   7   12.24   17.73
   0  -4  -7  956.82   94.13
   0   4   7  960.79   82.06
   1   4   7  237.55   37.34
  -1  -4  -7  174.19   33.79
   2   4   7 3283.67  217.71
   2   4   7 2726.49  213.51
   3   4   7   12.25   12.75
   3   4   7    9.37   26.09
   4   4   7   99.57   21.09
   4   4   7   20.97   28.05
   5   4   7  179.44   42.84
   5   4   7  201.54   25.13
   6   4   7  439.37   53.47
   7   4   7  173.94   47.31
   8   4   7  -50.76   29.39
   9   4   7  -54.99   40.00
  10  -5  -7  -26.69   19.33
   9  -5  -7   28.88   23.61
  -9   5   7   43.65   27.06
  -8   5   7    6.54   21.09
   8  -5  -7   11.00   15.88
  -7   5   7  106.19   25.33
   7  -5  -7   90.36   21.88
   6  -5  -7   21.68   14.18
  -6   5   7   10.99   14.93
  -5   5   7  177.13   22.51
   5  -5  -7  207.63   25.63
  -4   5   7   67.85   17.95
   4  -5  -7   22.92   17.78
   4  -5  -7   80.17   17.16
  -3   5   7 1728.12  120.02
   3  -5  -7 1549.20  152.45
   3  -5  -7 1870.34  125.73
   2  -5  -7  174.21   17.70
   2  -5  -7  163.95   29.28
  -2   5   7  127.50   24.06
   1  -5  -7 1112.02  109.65
   1  -5  -7 1176.87   84.92
  -1   5   7 1199.57   93.26
   0   5   7  -15.09   34.86
   0  -5  -7    9.00   16.43
   2   5   7    4.50    9.59
  -2  -5  -7    2.39   22.10
   2   5   7   18.72   32.47
   3   5   7 1053.17   92.84
   3   5   7 1072.46   81.79
   4   5   7   39.42   12.91
   4   5   7  -12.35   25.61
   5   5   7   73.99   34.45
   6   5   7  -24.87   22.84
   7   5   7   41.20   40.96
  10  -6  -7   -5.98   19.29
   9  -6  -7  180.60   38.37
   8  -6  -7   83.16   25.60
  -8   6   7   72.59   25.66
  -7   6   7   18.21   19.07
   7  -6  -7   37.96   18.62
  -6   6   7    2.75   15.35
   6  -6  -7  -10.56   11.01
   5  -6  -7  395.23   38.73
  -5   6   7  394.34   36.72
   4  -6  -7  340.96   32.25
   4  -6  -7  272.08   39.74
  -4   6   7  340.29   33.17
   3  -6  -7   92.29   14.61
  -3   6   7  109.72   25.42
   3  -6  -7   89.84   21.65
  -2   6   7  511.95   49.12
   2  -6  -7  505.92   40.87
   2  -6  -7  497.52   54.27
   1  -6  -7   98.16   21.78
   1  -6  -7   85.25   11.42
  -1   6   7   40.80   31.64
   0  -6  -7  122.16   26.18
   0  -6  -7  139.40   14.97
   0   6   7  176.36   48.42
   2   6   7  474.46   55.93
  -2  -6  -7  296.89   45.80
   2   6   7  344.51   31.99
  -3  -6  -7  291.83   47.43
   3   6   7  423.95   53.65
   4   6   7  -28.25   25.93
   5   6   7   21.22   36.26
   6   6   7    9.48   30.90
   7   6   7   97.00   47.57
   9   6   7  -81.73   37.66
  10  -7  -7   29.79   27.13
   9  -7  -7    0.56   16.78
   8  -7  -7  183.55   30.49
   7  -7  -7  131.05   27.97
  -7   7   7  146.95   28.91
   6  -7  -7   73.56   20.05
  -6   7   7   68.40   21.91
  -5   7   7   59.72   20.06
   5  -7  -7   45.19   17.18
   4  -7  -7  302.57   39.22
  -4   7   7  255.87   31.56
   4  -7  -7  323.69   30.68
  -3   7   7  137.55   29.75
   3  -7  -7  107.81   16.03
   3  -7  -7   95.78   22.67
   2  -7  -7  159.40   16.49
  -2   7   7   84.77   29.34
   1  -7  -7  254.95   20.71
  -1   7   7  158.14   46.16
   0  -7  -7   15.57   13.73
   0  -7  -7   14.13    6.98
  -1  -7  -7    2.13   12.47
   1   7   7  -38.35   31.64
   2   7   7  265.35   56.75
  -2  -7  -7  218.72   35.69
   3   7   7  133.72   44.33
  -3  -7  -7   98.62   28.13
  -4  -7  -7  134.68   34.51
   4   7   7  173.49   46.54
   5   7   7  -17.37   30.57
   6   7   7   25.92   40.64
   7   7   7  -66.57   33.24
   8   7   7   43.45   43.94
  10   7   7  -77.78   40.09
  10  -8  -7   22.62   24.52
   9  -8  -7   24.72   21.98
   8  -8  -7  184.99   30.69
   7  -8  -7    0.35   12.55
   6  -8  -7  495.15   45.85
  -6   8   7  411.74   41.29
   5  -8  -7   86.64   19.35
  -5   8   7   80.06   22.81
   4  -8  -7  862.91   81.78
   4  -8  -7  869.06   67.49
  -4   8   7  776.71   67.36
   3  -8  -7   -0.98   11.39
  -3   8   7  -33.84   18.43
   3  -8  -7    1.38    7.51
  -2   8   7  818.30   73.31
   2  -8  -7  725.01   58.63
   2  -8  -7  753.43   75.44
   1  -8  -7   25.37    8.04
   1  -8  -7   11.64   12.55
  -1   8   7  -21.25   29.52
   0   8   7  782.55   77.74
   0  -8  -7  691.13   72.32
   0  -8  -7  711.08   54.39
  -1  -8  -7    5.18   13.96
  -2  -8  -7  887.24   95.74
   2   8   7 1110.46   95.64
   3   8   7  288.56   61.45
  -4  -8  -7  327.45   51.80
   4   8   7  487.38   57.23
  -5  -8  -7  -21.56   20.11
   5   8   7  -32.33   28.30
   6   8   7  189.66   53.67
   7   8   7  -24.63   40.22
   8   8   7  -39.06   36.01
  10  -9  -7   25.57   25.36
   9  -9  -7   -8.11   17.81
   8  -9  -7   33.79   21.08
   7  -9  -7  114.18   26.74
   6  -9  -7   80.33   21.07
   5  -9  -7   48.23   16.69
  -5   9   7   55.30   22.86
  -4   9   7  -13.95   19.23
   4  -9  -7    0.51   12.85
   4  -9  -7   -5.13    7.52
  -3   9   7  363.89   46.29
   3  -9  -7  399.25   44.33
   3  -9  -7  367.05   33.69
  -2   9   7   59.51   36.78
   2  -9  -7   36.51   16.39
   2  -9  -7   42.85   11.36
   1  -9  -7  102.24   22.76
  -1   9   7  120.38   49.07
   1  -9  -7   77.88   12.80
   0  -9  -7   26.25   15.65
   0   9   7  -33.72   33.48
  -1  -9  -7  420.29   50.47
   1   9   7  492.14   59.40
   2   9   7  -14.78   36.72
  -2  -9  -7   10.88   14.79
   3   9   7  331.88   66.60
  -4  -9  -7   -6.40   18.67
   4   9   7    5.25   37.87
   5   9   7   -9.16   32.63
  -5  -9  -7   -9.63   19.78
   6   9   7  108.16   53.24
   7   9   7    0.42   41.95
   8   9   7  -35.07   36.53
   9   9   7  -63.09   40.40
   9 -10  -7   61.78   25.39
   8 -10  -7   25.46   18.34
   7 -10  -7   41.15   20.40
   6 -10  -7    6.67   14.43
   5 -10  -7   40.54   16.62
   4 -10  -7    2.29   10.26
  -4  10   7   10.77   23.11
   4 -10  -7    5.02   13.54
   3 -10  -7    0.40   11.04
   3 -10  -7   -2.71    7.39
  -3  10   7  -40.67   27.81
  -2  10   7  -36.63   34.68
   2 -10  -7    8.99    9.25
   2 -10  -7    4.57   11.79
   1 -10  -7    8.57    7.25
  -1  10   7  -53.57   34.91
   1 -10  -7   12.60   13.31
   0 -10  -7   53.16   18.44
   0  10   7   66.71   45.67
  -1 -10  -7   45.07   18.29
   1  10   7   -8.98   34.60
  -2 -10  -7  118.19   27.79
   2  10   7  153.62   49.98
   3  10   7   27.25   38.43
  -3 -10  -7   57.08   22.44
   4  10   7   -6.18   33.07
  -4 -10  -7   13.42   21.87
  -5 -10  -7  103.26   33.44
   5  10   7  173.08   54.67
  -6 -10  -7    0.85   22.35
   7  10   7   88.26   56.95
   9  10   7  -85.94   47.05
   9 -11  -7   33.63   24.16
   8 -11  -7   19.21   19.35
   7 -11  -7  104.89   26.04
   6 -11  -7    7.90   14.92
   5 -11  -7  504.28   46.45
   4 -11  -7   38.09   18.12
   4 -11  -7   45.04   14.45
  -3  11   7  345.18   62.35
   3 -11  -7  201.35   34.38
   2 -11  -7   -7.50   11.39
   2 -11  -7   -7.60    6.66
  -2  11   7  -47.04   34.87
   1 -11  -7 1281.85  133.03
  -1  11   7 1686.51  132.51
   0  11   7   20.51   40.70
   0 -11  -7   28.58   15.67
  -1 -11  -7  321.16   42.17
   1  11   7  326.88   51.54
   2  11   7   79.56   47.14
  -2 -11  -7   66.63   21.18
  -3 -11  -7  185.76   35.20
   3  11   7  230.44   59.81
   4  11   7   -7.85   38.27
  -4 -11  -7   62.48   25.99
  -5 -11  -7  194.07   38.95
   5  11   7  308.99   68.09
   6  11   7  -11.27   43.02
  -6 -11  -7   22.23   24.67
   7  11   7  -41.93   37.90
   8  11   7  -73.52   39.19
   9 -12  -7  -15.72   15.86
   8 -12  -7   -1.47   17.12
   7 -12  -7   17.19   17.01
   6 -12  -7  167.17   25.73
   5 -12  -7   -1.78   11.52
   4 -12  -7  214.27   32.51
   4 -12  -7  184.62   24.05
   3 -12  -7  -11.58    8.41
   3 -12  -7  -10.10   12.27
  -2  12   7  384.74   55.68
   2 -12  -7  292.36   39.27
   2 -12  -7  262.08   28.21
  -1  12   7  -14.50   38.80
   1 -12  -7    1.28   12.82
   0  12   7 1102.68  104.69
   1  12   7  126.99   49.17
  -1 -12  -7  121.46   27.97
   2  12   7   37.57   48.40
  -2 -12  -7   74.13   24.16
  -3 -12  -7   -7.05   16.37
   3  12   7  -54.44   31.16
   4  12   7  151.79   55.76
  -4 -12  -7  135.09   32.85
  -5 -12  -7   49.61   26.69
   5  12   7    4.00   42.82
   6  12   7  -25.66   42.06
  -6 -12  -7    9.48   22.22
  -7 -12  -7   -2.66   23.27
   8 -13  -7   67.85   26.73
   7 -13  -7   15.70   17.07
   6 -13  -7  127.40   23.35
   5 -13  -7   34.44   15.58
   4 -13  -7   35.36   19.50
   4 -13  -7   47.94   16.09
   3 -13  -7   -0.52    9.60
   3 -13  -7    3.76   13.32
   2 -13  -7  100.95   25.18
   1 -13  -7   60.91   23.96
  -1  13   7  136.66   47.99
   0 -13  -7   64.51   22.82
   0  13   7   89.25   49.59
  -1 -13  -7   -4.83   14.29
   1  13   7  -25.09   34.62
  -2 -13  -7   90.34   26.28
   2  13   7   50.24   49.33
  -3 -13  -7   -5.43   16.62
   3  13   7   19.68   40.51
   4  13   7  206.72   63.55
  -4 -13  -7  136.20   31.85
   5  13   7  -61.02   45.85
  -5 -13  -7   11.52   22.84
   6  13   7   58.65   60.69
  -6 -13  -7   71.79   29.95
   7  13   7  -81.78   46.86
   8 -14  -7    2.71   19.58
   7 -14  -7   86.35   24.85
   6 -14  -7   61.38   20.52
   5 -14  -7   17.96   14.75
   4 -14  -7   66.98   23.17
   4 -14  -7   98.35   19.68
   3 -14  -7    5.95   13.67
   2 -14  -7  145.99   28.71
   1 -14  -7   13.88   17.13
   0 -14  -7  197.87   34.36
   0  14   7  292.39   64.05
  -1 -14  -7  144.02   30.53
   1  14   7  254.39   62.80
  -2 -14  -7  117.95   27.69
   2  14   7  158.46   57.92
   3  14   7  -32.14   38.86
  -3 -14  -7    0.23   16.14
   4  14   7   86.27   54.04
  -4 -14  -7   66.72   26.82
  -5 -14  -7  107.84   31.94
   5  14   7   83.62   52.65
   6  14   7  -84.69   51.43
  -6 -14  -7    7.09   24.61
   7  14   7  -94.85   45.65
   7 -15  -7   68.11   25.80
   6 -15  -7    7.70   17.42
   5 -15  -7  172.46   24.20
   4 -15  -7   32.06   19.58
   3 -15  -7  135.46   27.06
   2 -15  -7    5.48   15.63
   1 -15  -7  303.13   41.90
   0 -15  -7   39.93   19.96
   1  15   7  409.14   76.28
  -2 -15  -7   14.38   17.14
   2  15   7   -4.10   41.36
  -3 -15  -7  183.78   36.87
   3  15   7  323.52   71.88
   4  15   7  -50.27   36.98
  -4 -15  -7   12.75   21.76
  -5 -15  -7  111.76   35.79
   5  15   7  110.23   65.30
   6  15   7  -66.37   45.14
  -6 -15  -7   -1.16   21.12
   7  15   7  -56.90   50.12
   7 -16  -7    6.84   19.24
   6 -16  -7   11.07   16.55
   4 -16  -7   24.37   20.23
   3 -16  -7   -2.95   14.94
   2 -16  -7   10.02   17.48
   1 -16  -7   -5.86   14.46
   0 -16  -7   33.83   18.96
  -1 -16  -7    6.93   16.16
   2  16   7   19.77   40.32
  -2 -16  -7   14.68   19.82
   3  16   7  178.81   61.23
  -3 -16  -7  122.70   33.22
   4  16   7   77.38   49.85
  -4 -16  -7   45.06   25.63
  -5 -16  -7   48.34   27.01
   5  16   7    6.85   54.27
   6  16   7 -102.53   54.52
  -6 -16  -7   18.65   27.35
   7  16   7  -35.73   62.54
   4 -17  -7   22.20   21.41
   3 -17  -7   90.16   27.91
   2 -17  -7   -3.88   13.80
   1 -17  -7    2.54   15.57
   0 -17  -7  -14.56   12.64
  -1 -17  -7   58.90   23.53
  -2 -17  -7   25.80   21.91
  -3 -17  -7   53.62   26.72
  -4 -17  -7   59.27   26.27
   4  17   7  -14.45   50.83
   5  17   7  -25.87   48.90
  -5 -17  -7   -0.27   23.48
  -6 -17  -7   49.59   31.23
   6  17   7   17.20   55.71
   3 -18  -7    6.38   16.91
   2 -18  -7  163.86   33.30
   1 -18  -7    8.07   16.87
   0 -18  -7   97.02   29.03
  -1 -18  -7   -2.48   18.05
  -2 -18  -7  205.61   35.85
  -3 -18  -7    6.13   21.01
  -4 -18  -7   17.79   24.84
   5  18   7  -50.56   45.79
  -5 -18  -7   -6.01   23.07
   3 -19  -7  117.25   33.34
   2 -19  -7    1.06   17.23
   1 -19  -7   30.92   20.41
   0 -19  -7   13.46   18.45
  -1 -19  -7   53.19   24.49
  -2 -19  -7   34.00   22.07
  -3 -19  -7   14.93   20.93
  -4 -19  -7    4.51   20.90
   3 -20  -7   17.22   22.94
   2 -20  -7   21.11   22.07
   1 -20  -7    8.85   20.16
   0 -20  -7   10.68   21.43
  -1 -20  -7    4.46   20.84
  -2 -20  -7   10.64   21.36
  -3 -20  -7   42.72   24.43
  -3 -20   8   -2.65   17.00
  -2 -20   8  127.15   33.55
  -1 -20   8  -14.41   20.07
   0 -20   8   53.48   27.42
   1 -20   8    1.06   22.07
   2 -20   8   76.11   28.61
  -4 -19   8   -2.69   14.44
  -3 -19   8   58.54   23.62
  -2 -19   8   31.56   21.08
  -1 -19   8   55.05   25.38
   0 -19   8   -7.44   16.62
   1 -19   8   32.64   24.16
   2 -19   8   18.69   23.45
   3 -19   8    5.30   19.22
   4 -19   8   28.98   32.60
   4 -19   8   24.29   21.21
  -4 -18   8    4.05   13.44
  -3 -18   8    1.67   15.75
  -2 -18   8    8.80   15.91
  -1 -18   8   97.73   27.68
   0 -18   8  -15.12   18.30
   1 -18   8   -2.34   19.82
   2 -18   8    1.40   16.79
   3 -18   8   95.95   40.05
   4 -18   8  -18.77   30.17
   5 -18   8    1.96   35.23
  -4 -17   8    2.38   11.58
  -3 -17   8  150.52   27.25
  -2 -17   8   59.78   22.82
  -1 -17   8   62.41   25.19
   0 -17   8    5.25   17.92
   2 -17   8   14.37   30.07
   3 -17   8   25.55   32.51
   4 -17   8   -9.19   29.07
   5 -17   8  -38.01   34.38
  -4 -16   8  137.73   24.24
  -3 -16   8   12.58   14.26
  -2 -16   8  119.85   25.19
  -1 -16   8   -8.29   13.26
   1 -16   8   59.92   33.18
   2 -16   8  100.06   37.61
   3 -16   8  -17.77   27.76
   4 -16   8   12.53   35.64
   5 -16   8    7.64   35.52
   6 -16   8  -21.72   29.71
   7  15  -8    3.01   22.41
  -4 -15   8    0.55   10.84
  -3 -15   8   64.64   17.78
  -2 -15   8    1.96   12.03
   0 -15   8   85.07   34.59
   1 -15   8    3.05   27.75
   2 -15   8   89.42   37.72
   3 -15   8  -12.89   26.62
   4 -15   8   62.56   39.07
   5 -15   8  -26.23   26.06
   6 -15   8   40.06   39.44
   7 -15   8  -42.29   31.66
   7  14  -8  -21.86   25.03
   6  14  -8  129.16   31.38
   5  14  -8    9.98   17.39
  -4 -14   8   76.87   17.31
  -3 -14   8   -4.77    9.21
  -1 -14   8   47.82   30.87
   0 -14   8  213.60   52.51
   1 -14   8   65.27   37.43
   2 -14   8  -15.16   23.82
   3 -14   8   66.92   35.67
   4 -14   8  -21.25   28.70
   5 -14   8   -2.47   33.62
   6 -14   8  -28.51   29.64
   8  13  -8  -34.26   22.28
   7  13  -8  134.72   34.68
   6  13  -8    2.13   19.11
   5  13  -8  568.39   48.78
   4  13  -8   43.93   16.27
  -4 -13   8   23.17   12.32
  -3 -13   8  238.21   30.37
  -1 -13   8  562.55   72.69
   0 -13   8    4.96   35.14
   1 -13   8  236.77   59.54
   2 -13   8   -6.87   30.06
   3 -13   8   13.69   30.26
   4 -13   8  -24.60   23.82
   5 -13   8    3.76   30.58
   6 -13   8  -31.32   24.80
   7 -13   8  -48.34   25.07
   9  12  -8  -37.92   30.12
   8  12  -8  -14.84   22.06
   7  12  -8   71.73   26.01
   6  12  -8   85.59   25.58
   5  12  -8   23.73   15.17
   4  12  -8   73.50   18.29
  -4 -12   8   45.71   14.24
   3  12  -8   34.07   13.36
  -2 -12   8    8.58   22.62
  -1 -12   8   15.78   33.20
   0 -12   8   41.04   40.65
   1 -12   8  475.05   73.31
   2 -12   8  -20.46   25.51
   3 -12   8   75.74   37.17
   4 -12   8   19.59   29.20
   5 -12   8  137.16   45.99
   7 -12   8  -22.19   28.07
   9  11  -8  -46.46   28.57
   8  11  -8  -18.57   20.94
   7  11  -8   40.76   24.70
   6  11  -8   -5.24   13.73
   5  11  -8   59.15   18.13
   4  11  -8   97.56   19.18
  -4 -11   8   58.49   14.28
   3  11  -8   99.77   18.29
   2  11  -8   23.40   10.84
  -2 -11   8    7.76   27.61
  -1 -11   8   58.01   40.71
   0 -11   8  321.25   78.25
   1 -11   8   94.91   46.97
   2 -11   8  133.35   48.31
   3 -11   8   -8.12   25.74
   4 -11   8   62.14   34.72
   5 -11   8  -20.68   21.84
   6 -11   8   66.22   38.48
   7 -11   8  -26.30   26.71
   8 -11   8   -3.78   30.02
   9  10  -8   -5.05   31.69
   8  10  -8  198.17   40.45
   7  10  -8    3.63   20.54
   6  10  -8  257.89   28.91
   5  10  -8   -0.08   13.20
   4  10  -8  384.36   33.01
  -4 -10   8  351.89   37.26
   3  10  -8   50.51   14.17
  -2 -10   8  264.66   49.18
   2  10  -8  350.73   26.63
  -1 -10   8   18.25   38.79
   1  10  -8   18.70   10.03
   0 -10   8 1044.93  125.39
   1 -10   8   48.16   41.88
   2 -10   8  330.69   57.06
   3 -10   8   29.12   30.02
   4 -10   8  117.32   39.30
   5 -10   8   -7.94   23.52
   6 -10   8  -30.90   21.38
   8 -10   8  -34.46   23.01
   9 -10   8  -54.93   28.05
   9   9  -8   70.79   32.30
   8   9  -8   62.49   27.18
   7   9  -8   79.04   24.28
   6   9  -8   77.68   22.64
   5   9  -8  214.99   23.91
   4   9  -8    2.53   10.63
   3   9  -8  182.11   19.50
   2   9  -8  325.35   26.94
   1   9  -8  338.80   28.19
  -1  -9   8  397.89   66.10
   0  -9   8   17.33   41.90
   1  -9   8  276.24   66.87
   2  -9   8   98.85   40.02
   3  -9   8   70.60   34.97
   4  -9   8  227.17   42.03
   5  -9   8   94.63   36.54
   6  -9   8    4.75   28.16
   7  -9   8  -28.02   21.63
   8  -9   8   23.94   32.06
  10   8  -8  -42.07   23.22
   9   8  -8   18.52   29.95
   8   8  -8  145.40   34.90
   7   8  -8   53.76   22.33
   6   8  -8   92.03   22.97
   5   8  -8    1.14    9.85
   4   8  -8   93.64   17.44
   3   8  -8   42.38   11.77
   2   8  -8  160.91   16.82
   1   8  -8  244.90   22.66
  -1  -8   8  326.16   67.40
   0  -8   8   85.65   14.13
   0  -8   8   98.50   55.03
   1  -8   8   97.22   47.24
   2  -8   8  280.94   49.14
   3  -8   8  263.59   44.72
   4  -8   8  -10.90   19.26
   5  -8   8  203.13   39.52
   6  -8   8   -6.84   21.56
   7  -8   8  105.02   41.15
   8  -8   8  -35.73   26.51
   9  -8   8  -27.93   29.02
  10  -8   8  -38.09   31.52
  10   7  -8  -47.62   25.09
   9   7  -8   55.96   32.91
   8   7  -8   26.75   20.48
   7   7  -8  486.01   45.35
   6   7  -8   53.27   17.29
   5   7  -8  184.60   21.45
   4   7  -8    2.14    9.97
   3   7  -8  757.08   54.79
   2   7  -8   16.36    8.62
   1   7  -8   50.51    8.64
   0  -7   8  468.31   69.91
   0  -7   8  397.29   33.80
   1  -7   8  186.78   25.47
   1  -7   8  308.67   54.43
   2  -7   8   66.48   32.13
   3  -7   8  181.32   41.59
   4  -7   8   41.96   27.17
   5  -7   8  -13.18   16.25
   6  -7   8   15.23   25.42
   8  -7   8    1.23   25.52
  10   6  -8    0.03   29.83
   9   6  -8   27.39   28.65
   8   6  -8  376.43   39.71
   7   6  -8   22.57   18.87
   6   6  -8  336.94   33.62
   5   6  -8   -0.78   10.44
   4   6  -8  728.61   54.10
   3   6  -8   -3.91    7.86
   2   6  -8 1553.00  103.99
  -1  -6   8  227.51   20.46
   0  -6   8  502.56   39.78
   0  -6   8  536.84   68.30
   1  -6   8  -10.85   17.51
   2  -6   8  765.77   81.13
   3  -6   8  180.24   35.06
   4  -6   8   10.79   20.45
   5  -6   8  -15.10   19.11
   6  -6   8   24.70   27.16
   7  -6   8   39.30   33.32
   8  -6   8  -34.67   21.47
  10   5  -8  -20.66   25.73
   9   5  -8  -15.40   24.97
   8   5  -8   98.87   29.09
   7   5  -8   26.41   17.95
   6   5  -8   11.27   13.47
   5   5  -8  183.50   21.24
   4   5  -8    8.26    9.95
   3   5  -8  218.88   20.77
   2   5  -8  377.47   29.31
  -1  -5   8   29.50   10.29
   0  -5   8  989.05   70.29
   1  -5   8  -18.16   15.91
   1  -5   8    1.89   13.34
   2  -5   8  513.60   60.58
   2  -5   8  495.79   42.89
   3  -5   8   16.06   18.30
   3  -5   8   -4.60   14.29
   4  -5   8  427.02   52.46
   5  -5   8  -21.62   19.71
   6  -5   8  235.87   42.09
   7  -5   8  -27.58   21.17
   8  -5   8   71.97   37.83
   9  -5   8  -44.41   24.92
  10  -5   8  -29.15   32.78
  11   4  -8  -39.41   27.20
  10   4  -8   34.37   29.52
   9   4  -8   73.15   27.24
   9   4  -8   33.87   25.51
   8   4  -8  112.03   28.74
   7   4  -8   36.78   19.53
   6   4  -8  334.92   33.04
   5   4  -8   97.41   16.15
   4   4  -8  792.02   58.00
   3   4  -8   13.38    9.49
   2   4  -8 1077.03   73.35
  -1  -4   8  704.91   50.82
   0  -4   8  652.41   49.74
   1  -4   8   93.77   29.99
   1  -4   8   71.40   22.13
   2  -4   8  183.19   30.36
   2  -4   8  166.44   32.74
   3  -4   8  417.89   42.30
   3  -4   8  506.23   54.77
   4  -4   8   10.53   20.59
   4  -4   8   15.78   18.99
   5  -4   8   12.12   21.68
   5  -4   8   41.29   21.10
   6  -4   8  -16.34   19.15
   7  -4   8  107.28   41.38
   8  -4   8  -24.03   23.59
   9  -4   8  -19.20   30.62
  11   3  -8   12.82   32.74
  10   3  -8  -20.66   25.75
  10   3  -8   -5.96   23.24
   9   3  -8  171.42   29.53
   9   3  -8  203.93   43.37
   8   3  -8   15.31   20.16
   8   3  -8    8.57   17.24
   7   3  -8  390.93   45.80
   7   3  -8  351.71   35.85
   6   3  -8  159.01   28.87
   6   3  -8  168.23   22.50
   5   3  -8  673.47   52.00
   4   3  -8  260.27   25.15
   3   3  -8 1294.54   88.35
  -2  -3   8  249.05   21.94
  -1  -3   8 1281.02   87.57
   0  -3   8  302.34   28.39
   1  -3   8  618.46   67.17
   1  -3   8  823.16   61.64
   2  -3   8   65.31   26.16
   2  -3   8  113.11   29.01
   3  -3   8  430.43   46.91
   3  -3   8  309.02   36.68
   4  -3   8  -29.25   15.25
   4  -3   8  -19.36   13.78
   5  -3   8  -27.53   16.02
   5  -3   8  -13.70   19.04
   6  -3   8  136.89   39.60
   6  -3   8  166.21   35.43
   7  -3   8  -18.91   22.38
   8  -3   8  -42.33   21.03
   9  -3   8  -41.63   24.20
  11   2  -8   16.01   30.08
  10   2  -8    9.34   22.34
  10   2  -8  -20.57   23.35
   9   2  -8   41.00   27.25
   9   2  -8    1.33   18.88
   8   2  -8  151.58   25.05
   8   2  -8  148.84   35.60
   7   2  -8   19.81   14.65
   7   2  -8   -4.78   15.88
   6   2  -8   34.56   19.89
   6   2  -8   61.81   17.60
   5   2  -8   43.19   19.91
   5   2  -8  111.11   17.44
   4   2  -8  237.87   23.52
  -2  -2   8 1259.06   86.06
  -1  -2   8   98.03   13.69
   0  -2   8   29.57   16.29
   1  -2   8 2309.06  162.04
   2  -2   8  387.96   45.24
   2  -2   8  569.20   53.87
   3  -2   8  927.41   78.62
   3  -2   8  751.17   68.95
   4  -2   8   -2.38   13.55
   4  -2   8  -28.64   19.45
   5  -2   8  697.88   62.99
   5  -2   8  698.86   71.00
   6  -2   8   -2.78   19.99
   6  -2   8  -23.44   19.79
   7  -2   8  198.77   36.74
   7  -2   8  250.16   42.71
   8  -2   8  -34.37   23.34
   9  -2   8  -37.75   27.54
  11   1  -8    8.75   27.46
  11   1  -8   10.90   29.59
  10   1  -8   55.43   27.39
  10   1  -8   85.85   35.58
   9   1  -8  168.48   32.93
   9   1  -8  134.99   37.91
   8   1  -8   52.75   25.19
   8   1  -8   58.15   22.45
   7   1  -8  188.50   32.18
   7   1  -8  184.12   24.89
   6   1  -8  116.63   18.64
   6   1  -8   68.65   21.89
   5   1  -8 1219.90   86.04
   5   1  -8 1197.15   96.94
   4   1  -8   77.00   15.39
   4   1  -8   78.73   19.48
  -2  -1   8  220.86   20.26
  -1  -1   8  652.75   49.29
   0  -1   8  557.46   46.54
   1  -1   8  369.46   41.52
   2  -1   8  388.66   43.77
   2  -1   8  364.76   41.32
   3  -1   8  255.21   35.39
   3  -1   8  257.42   35.80
   4  -1   8  423.75   47.90
   4  -1   8  356.43   43.72
   5  -1   8  260.04   38.52
   5  -1   8  375.47   46.29
   6  -1   8  454.38   56.09
   6  -1   8  393.78   48.54
   7  -1   8  -50.74   24.92
   7  -1   8  -13.25   24.10
   8  -1   8   -8.44   30.01
   8  -1   8  -27.20   34.59
  11   0  -8    6.62   27.65
  11   0  -8   16.02   28.73
  10   0  -8   80.15   28.61
  10   0  -8   62.04   30.51
   9   0  -8   -0.85   16.42
   9   0  -8  -10.51   19.64
   8   0  -8  237.78   29.38
   8   0  -8  265.83   38.38
   7   0  -8    6.99   14.45
   7   0  -8    1.09   15.02
   6   0  -8  627.38   49.39
   6   0  -8  581.88   56.82
   5   0  -8   38.89   15.51
   5   0  -8   16.74   14.31
   4   0  -8  609.19   53.23
   4   0  -8  616.70   46.45
   3   0  -8   -7.17    7.18
  -3   0   8   -1.24    8.03
  -2   0   8  144.08   15.89
   0   0   8 1439.15  103.99
   1   0   8    1.82   23.61
   2   0   8  403.78   44.60
   2   0   8  425.92   43.69
   3   0   8    0.90   13.03
   4   0   8   84.11   25.30
   4   0   8   27.82   31.99
   5   0   8  -21.45   16.74
   5   0   8  -21.50   19.10
   6   0   8   13.77   28.01
   6   0   8   40.29   27.10
   7   0   8  -27.05   21.16
   8   0   8  -46.83   33.72
   8   0   8  -25.19   25.56
  11  -1  -8    5.36   28.74
  11  -1  -8   28.29   27.67
  10  -1  -8   77.52   32.95
  10  -1  -8   78.26   29.00
   9  -1  -8  122.39   35.64
   9  -1  -8  136.70   30.59
   8  -1  -8   23.24   20.77
   8  -1  -8   67.66   22.48
   7  -1  -8  160.61   22.33
   7  -1  -8  143.62   30.09
   6  -1  -8  129.72   23.40
   6  -1  -8   73.95   21.81
   5  -1  -8 1211.07   97.80
   5  -1  -8 1267.13   88.42
   4  -1  -8   48.12   15.60
  -4   1   8   69.07   15.96
  -3   1   8    7.42    9.34
   3  -1  -8   -6.82    7.35
  -2   1   8  124.54   15.65
  -1   1   8  629.76   49.17
   0   1   8  687.52   58.38
   1   1   8  528.91   54.86
   2   1   8  576.74   59.65
   3   1   8  388.28   40.06
   3   1   8  261.20   39.33
   4   1   8  477.44   47.60
   4   1   8  353.58   45.69
   5   1   8  390.32   43.74
   5   1   8  206.57   36.76
   6   1   8  421.81   52.90
   6   1   8  565.89   58.22
   7   1   8  -29.03   19.24
   7   1   8  -31.47   22.50
   8   1   8  -15.34   39.40
  11  -2  -8   18.24   23.44
  11  -2  -8    0.57   27.49
  10  -2  -8   -7.87   20.06
  10  -2  -8    5.58   19.68
   9  -2  -8   27.80   19.23
   9  -2  -8   12.65   20.71
   8  -2  -8  121.56   21.53
   8  -2  -8  124.90   31.05
   7  -2  -8   24.51   15.66
   7  -2  -8    4.72   15.62
   6  -2  -8   38.32   16.06
   6  -2  -8   30.70   15.84
  -5   2   8   80.18   18.40
   5  -2  -8   41.60   16.09
   4  -2  -8  130.92   20.08
  -4   2   8  178.80   19.73
  -3   2   8   55.48   15.37
   3  -2  -8   26.39   11.31
  -2   2   8 1294.89   89.54
   2  -2  -8 1250.90   94.88
  -1   2   8  191.41   23.18
   0   2   8   97.10   27.18
   1   2   8 2503.39  181.33
   2   2   8  460.03   43.96
   3   2   8 1245.08  102.33
   3   2   8 1238.72  100.00
   4   2   8   -1.36   24.19
   4   2   8   36.15   18.63
   5   2   8  868.90   74.50
   5   2   8  718.66   72.21
   6   2   8   18.22   19.67
   6   2   8  -11.36   29.36
   7   2   8  220.88   54.83
   9   2   8  -72.77   37.85
  11  -3  -8   32.72   32.24
  10  -3  -8  -15.37   18.99
   9  -3  -8  172.89   32.88
   9  -3  -8  138.50   22.52
   8  -3  -8   -5.77   16.64
   7  -3  -8  332.95   39.80
   6  -3  -8  191.70   27.26
  -6   3   8  201.93   25.33
   5  -3  -8  598.68   53.71
  -5   3   8  613.75   48.88
   4  -3  -8  200.23   23.94
  -4   3   8  184.87   22.28
   3  -3  -8 1388.23  103.28
  -3   3   8 1385.05   97.36
  -1   3   8 1325.00   96.99
   0   3   8  277.89   36.10
   1   3   8  811.55   75.26
   2   3   8  175.27   45.66
   3   3   8  772.69   73.08
   3   3   8  715.58   65.09
   4   3   8  -43.29   21.41
   4   3   8   -4.65   12.26
   5   3   8    5.38   24.22
   5   3   8   28.12   17.32
   6   3   8  131.65   43.32
   7   3   8  -39.17   23.67
 -10   4   8   10.95   31.42
  10  -4  -8   45.98   28.39
  -9   4   8   31.73   25.33
   9  -4  -8   39.26   21.40
  -8   4   8   56.54   27.04
   8  -4  -8  105.74   27.27
  -7   4   8   -6.45   17.04
   7  -4  -8   -0.69   13.86
   6  -4  -8  232.86   29.41
  -6   4   8  224.38   26.99
  -5   4   8   72.60   19.36
   5  -4  -8   56.15   16.99
  -4   4   8  733.49   57.72
   4  -4  -8  769.14   61.67
  -3   4   8   11.19   14.44
   3  -4  -8   12.02    9.63
   2  -4  -8 1201.86   88.40
  -2   4   8 1177.08   87.21
   1  -4  -8  681.89   58.48
  -1   4   8  848.00   65.99
   0   4   8  685.61   66.02
   1   4   8  152.88   44.89
   2   4   8  221.03   55.56
   3   4   8  677.50   69.48
   3   4   8  742.59   62.16
   4   4   8   32.84   16.30
   4   4   8    6.52   34.44
   5   4   8   20.49   31.15
   6   4   8  -50.13   30.62
   7   4   8   92.47   48.74
   9   4   8  -77.09   39.51
  10  -5  -8   11.29   22.73
  -9   5   8    1.90   24.38
   9  -5  -8   -5.00   17.46
   8  -5  -8   36.67   20.98
  -8   5   8   61.77   26.22
   7  -5  -8    1.51   13.98
  -7   5   8   -5.30   18.19
  -6   5   8   -6.07   15.55
   6  -5  -8    5.58   11.70
  -5   5   8  187.12   24.03
   5  -5  -8  201.08   25.17
  -4   5   8   -9.48   13.97
   4  -5  -8    3.91    9.66
   4  -5  -8  -14.64   13.83
   3  -5  -8  167.46   18.81
  -3   5   8  132.27   26.80
   3  -5  -8   96.75   27.11
   2  -5  -8  458.60   36.33
   2  -5  -8  403.27   52.15
  -2   5   8  397.47   41.72
   1  -5  -8   31.58    9.66
   0   5   8  883.25   78.25
   0  -5  -8  753.51   84.78
   1   5   8  -34.46   27.65
  -1  -5  -8  -12.19   12.65
   2   5   8  604.07   66.81
   3   5   8   -0.72   13.98
   3   5   8    4.37   29.73
   4   5   8  557.98   62.42
   5   5   8  -63.33   30.75
   6   5   8  261.40   46.66
   7   5   8  -51.35   31.01
   8   5   8  -28.34   34.83
  10  -6  -8   32.94   24.28
   9  -6  -8   22.64   19.96
  -9   6   8   13.03   23.03
   8  -6  -8  299.75   39.77
  -8   6   8  342.26   36.98
   7  -6  -8    0.40   13.07
  -7   6   8   15.10   18.72
   6  -6  -8  301.14   34.06
  -6   6   8  288.80   31.93
  -5   6   8   -6.76   13.71
   5  -6  -8  -10.32    9.11
  -4   6   8  637.72   53.88
   4  -6  -8  670.53   54.64
  -3   6   8   -0.32   15.36
   2  -6  -8 2061.96  147.66
  -1   6   8  339.10   56.56
   1  -6  -8  301.55   28.68
   1  -6  -8  350.95   44.64
   0  -6  -8  376.77   49.56
   0   6   8  381.46   52.42
   1   6   8  -57.21   29.03
  -1  -6  -8    0.52   14.79
   3   6   8  292.49   49.22
  -3  -6  -8  157.41   38.05
   4   6   8   45.88   37.50
   5   6   8  -45.13   28.08
   6   6   8    6.82   34.69
   7   6   8  -11.90   38.97
   8   6   8  -63.25   33.59
  10  -7  -8   -4.14   20.52
   9  -7  -8   83.23   29.85
  -8   7   8    3.32   18.43
   8  -7  -8    4.93   17.10
  -7   7   8  401.07   39.97
   7  -7  -8  400.40   43.37
   6  -7  -8   19.82   12.12
  -6   7   8   18.72   18.87
  -5   7   8  203.27   26.13
   5  -7  -8  185.24   24.44
  -4   7   8  -19.63   14.21
   4  -7  -8   -2.50   15.34
   4  -7  -8   -3.23    8.71
   3  -7  -8  723.09   76.37
   3  -7  -8  811.06   59.35
  -3   7   8  693.99   63.22
  -2   7   8    0.37   20.90
   2  -7  -8   23.81   10.09
   2  -7  -8   33.59   19.59
  -1   7   8   -9.56   36.25
   0  -7  -8  556.51   60.02
   0   7   8  465.54   62.62
   1   7   8  355.33   70.29
   2   7   8  153.18   52.32
  -3  -7  -8  167.78   36.55
   3   7   8  261.16   46.56
   4   7   8   10.89   38.16
  -4  -7  -8   35.61   25.38
   5   7   8  -54.26   34.44
   6   7   8   -4.00   38.82
   8   7   8  -75.68   36.38
  10  -8  -8  -12.36   17.66
   9  -8  -8   38.67   20.61
   8  -8  -8   93.97   27.08
   7  -8  -8   26.43   17.00
   6  -8  -8   35.78   16.51
  -6   8   8   57.76   21.50
   5  -8  -8   -9.99    8.30
  -5   8   8  -11.03   14.13
   4  -8  -8   88.44   17.39
   4  -8  -8   47.79   21.65
  -4   8   8  101.04   26.83
   3  -8  -8   23.93   18.20
   3  -8  -8   33.21   11.30
  -3   8   8    8.47   23.93
   2  -8  -8  204.08   32.67
  -2   8   8  181.35   46.42
   2  -8  -8  172.36   20.09
  -1   8   8  348.10   65.21
   1  -8  -8  264.79   26.70
   0  -8  -8   17.51   16.79
   0   8   8   32.96   39.52
   0  -8  -8   43.61   10.11
   1   8   8  106.58   48.22
  -1  -8  -8   72.85   23.15
   2   8   8  560.94   71.56
  -3  -8  -8  280.55   48.03
   3   8   8  439.45   59.15
   4   8   8   -6.54   39.44
  -4  -8  -8    3.50   20.41
   5   8   8  264.93   47.67
   7   8   8   23.60   52.72
   9   8   8  -70.94   39.08
   9  -9  -8   87.51   28.58
   8  -9  -8   31.95   19.75
   7  -9  -8   50.51   20.60
   6  -9  -8   52.94   18.15
  -5   9   8  175.28   27.95
   5  -9  -8  203.75   25.48
   4  -9  -8   25.21   17.38
  -4   9   8    3.56   20.21
   4  -9  -8   13.46   10.87
  -3   9   8  257.36   48.29
   3  -9  -8  250.02   26.58
   3  -9  -8  326.12   39.87
  -2   9   8  357.43   51.82
   2  -9  -8  340.60   31.02
   2  -9  -8  353.94   44.45
   1  -9  -8  378.20   46.92
   1  -9  -8  378.86   33.11
  -1   9   8  434.74   62.51
   0  -9  -8   15.89   19.18
   0  -9  -8   29.16    9.46
   0   9   8  -20.58   34.38
  -1  -9  -8  137.05   29.89
   1   9   8  252.34   65.16
   2   9   8  113.63   50.09
  -2  -9  -8  117.95   28.48
   3   9   8  236.21   64.77
  -3  -9  -8  120.35   32.46
   4   9   8  409.20   59.12
   5   9   8  132.72   54.09
  -5  -9  -8   56.35   30.12
   6   9   8    6.79   43.64
   8   9   8  -10.91   42.99
   9 -10  -8   -0.56   17.76
   8 -10  -8  138.69   26.30
   7 -10  -8   11.77   15.00
   6 -10  -8  239.94   30.31
   5 -10  -8   -0.06   12.17
  -4  10   8  370.99   44.55
   4 -10  -8  364.23   35.22
   4 -10  -8  376.73   46.28
  -3  10   8   72.56   36.19
   3 -10  -8   41.36   18.84
   3 -10  -8   50.36   12.82
  -2  10   8  420.70   58.36
   2 -10  -8  349.84   32.76
   2 -10  -8  364.87   45.16
   1 -10  -8   11.21   15.37
   1 -10  -8   18.82    8.99
  -1  10   8   -9.03   42.52
  -1 -10  -8   81.57   24.36
   1  10   8   65.65   49.80
   2  10   8  605.65   76.20
   3  10   8   55.31   51.94
  -3 -10  -8   62.28   23.64
  -4 -10  -8   97.22   30.58
   4  10   8  178.59   58.08
   5  10   8   -9.57   49.03
  -5 -10  -8    4.35   19.89
   9 -11  -8  -12.72   15.13
   8 -11  -8   -0.65   16.90
   7 -11  -8   36.57   19.70
   6 -11  -8   10.29   14.14
   5 -11  -8   44.25   16.32
   4 -11  -8   92.31   19.04
   4 -11  -8   74.72   23.12
   3 -11  -8   60.07   22.15
   3 -11  -8   82.54   16.05
  -3  11   8   91.37   46.45
   2 -11  -8    9.30    9.06
   2 -11  -8    9.75   15.94
  -2  11   8  -11.44   39.29
  -1  11   8  136.65   53.56
   1 -11  -8   50.87   21.95
   0 -11  -8  214.21   36.16
   0  11   8  335.01   58.47
   1  11   8  219.49   65.91
  -1 -11  -8  118.71   29.51
  -2 -11  -8  209.93   38.33
   2  11   8  333.05   75.44
   3  11   8    6.90   49.27
  -3 -11  -8   20.28   19.70
   4  11   8  115.82   52.07
  -4 -11  -8   70.76   27.05
   5  11   8  -49.49   45.58
  -5 -11  -8   -5.29   18.25
   6  11   8  138.16   61.42
  -6 -11  -8  148.04   38.42
   7  11   8  -60.03   40.70
   8  11   8  -38.88   43.67
   9 -12  -8    0.33   17.90
   8 -12  -8   -5.91   16.34
   7 -12  -8   47.15   22.16
   6 -12  -8   69.01   21.16
   5 -12  -8   25.74   14.85
   4 -12  -8   70.35   24.00
   4 -12  -8   63.19   16.92
   3 -12  -8   41.24   13.73
   3 -12  -8   30.42   17.06
   2 -12  -8   -1.16   16.89
  -2  12   8   61.22   48.70
  -1  12   8   -1.99   45.96
   1 -12  -8   12.51   18.03
   0  12   8  173.64   59.52
   1  12   8  719.47   82.10
  -1 -12  -8  531.91   65.86
   2  12   8   13.13   48.21
  -2 -12  -8    2.97   18.00
   3  12   8  100.44   58.85
  -3 -12  -8  103.02   30.41
   4  12   8   -6.86   52.27
  -4 -12  -8   10.54   19.48
  -5 -12  -8  146.32   37.95
   5  12   8  172.47   63.65
  -6 -12  -8   -4.92   19.56
   7  12   8  -31.61   50.24
   8 -13  -8  -10.24   15.32
   7 -13  -8  107.36   27.91
   6 -13  -8   37.81   18.52
   5 -13  -8  514.90   48.26
   4 -13  -8   25.58   18.11
   4 -13  -8   37.17   13.65
   3 -13  -8  236.13   36.89
   3 -13  -8  246.57   26.39
   2 -13  -8    2.72   15.42
   0  13   8    0.12   49.23
   0 -13  -8   -8.73   14.45
   1  13   8  449.36   86.87
  -2 -13  -8    7.91   17.70
   2  13   8   27.78   53.53
  -3 -13  -8   23.50   21.09
   3  13   8   69.91   60.51
   4  13   8  -13.51   43.77
  -4 -13  -8   12.51   21.09
   5  13   8   12.47   57.59
  -5 -13  -8   42.19   25.07
   6  13   8  -44.37   47.15
  -6 -13  -8   18.02   25.31
   8 -14  -8  -10.30   15.16
   7 -14  -8    4.28   17.81
   6 -14  -8  117.85   25.17
   5 -14  -8   13.10   13.65
   4 -14  -8  100.34   26.95
   4 -14  -8   85.68   16.79
   3 -14  -8    7.27   13.96
   2 -14  -8   39.10   18.91
   1 -14  -8   63.39   22.71
   0 -14  -8  275.56   43.64
   0  14   8  404.53   63.78
  -1 -14  -8  106.39   29.05
   1  14   8  190.78   65.42
  -2 -14  -8  -14.55   16.31
   2  14   8    3.56   47.10
   3  14   8  169.31   65.10
  -3 -14  -8   94.54   31.62
  -4 -14  -8    7.85   20.24
   4  14   8  -45.62   40.55
  -5 -14  -8   67.40   29.56
   5  14   8   73.87   56.75
   6  14   8 -101.98   56.36
  -6 -14  -8   11.52   25.96
  -7 -14  -8    7.10   28.29
   7  14   8  -97.20   51.45
   7 -15  -8   -2.05   13.38
   6 -15  -8    4.85   15.31
   5 -15  -8   13.88   14.80
   4 -15  -8   15.94   17.49
   3 -15  -8   81.62   25.88
   2 -15  -8   39.89   18.69
   1 -15  -8   -1.15   13.89
   0 -15  -8   62.41   25.08
   1  15   8    9.22   48.03
  -1 -15  -8    4.26   17.76
   2  15   8  266.31   66.16
   3  15   8  -48.94   40.76
  -3 -15  -8  -14.44   15.77
  -4 -15  -8   90.95   30.28
   4  15   8  117.53   66.10
   5  15   8  -81.20   53.18
  -5 -15  -8   14.07   22.78
  -6 -15  -8   74.84   35.54
   6  15   8   -5.40   56.81
   7  15   8 -104.48   61.37
  -7 -15  -8   14.14   25.82
   7 -16  -8   -1.23   17.10
   6 -16  -8   65.87   22.05
   3 -16  -8    8.58   17.11
   2 -16  -8  140.49   28.55
   1 -16  -8    5.89   14.17
   0 -16  -8   47.68   21.46
  -1 -16  -8   80.51   25.78
  -2 -16  -8  104.01   32.82
   2  16   8  220.02   67.25
  -3 -16  -8    4.36   20.72
   3  16   8   38.66   55.43
  -4 -16  -8   28.99   23.00
   4  16   8  -10.43   54.90
  -5 -16  -8   58.99   30.10
   5  16   8   14.11   56.01
  -6 -16  -8   13.14   26.90
   3 -17  -8  124.19   28.55
   2 -17  -8   57.34   24.14
   1 -17  -8   44.57   21.90
   0 -17  -8    0.98   18.11
  -1 -17  -8  112.63   29.20
  -2 -17  -8   22.07   22.04
  -3 -17  -8   69.60   27.19
   3  17   8  105.14   65.45
   4  17   8   92.08   65.02
  -4 -17  -8   32.62   27.11
  -5 -17  -8   -9.47   20.65
   5  17   8  -44.14   53.21
   6  17   8  -53.55   54.78
  -6 -17  -8    5.11   24.90
   3 -18  -8   -3.47   17.03
   2 -18  -8   11.78   19.85
   1 -18  -8   75.67   27.03
   0 -18  -8    1.40   18.85
  -1 -18  -8   10.86   20.20
  -2 -18  -8    8.06   19.65
  -3 -18  -8  140.34   34.61
  -4 -18  -8   -7.64   21.51
  -5 -18  -8   45.06   29.25
   5  18   8  100.85   71.63
   3 -19  -8   77.90   29.46
   2 -19  -8   37.02   22.40
   1 -19  -8   58.50   25.86
   0 -19  -8    4.42   18.53
  -1 -19  -8   51.88   25.45
  -2 -19  -8   41.72   23.37
  -3 -19  -8    1.03   21.25
  -4 -19  -8   66.00   30.75
   3 -20  -8   -4.17   21.24
   2 -20  -8  134.34   36.07
   1 -20  -8   -1.79   19.91
   0 -20  -8   27.84   25.35
  -1 -20  -8    7.40   18.58
  -2 -20  -8   83.45   28.86
  -2 -20   9   -3.70   19.69
  -1 -20   9   92.39   33.50
   0 -20   9   19.80   25.54
   1 -20   9   18.50   25.37
  -4 -19   9   11.80   16.76
  -3 -19   9   12.86   19.16
  -2 -19   9   60.89   26.34
  -1 -19   9   -3.26   20.69
   0 -19   9   86.71   30.90
   1 -19   9   -9.90   18.05
   2 -19   9   50.39   26.38
   3 -19   9    2.07   16.83
  -4 -18   9   12.15   14.13
  -3 -18   9  -10.39   14.48
  -2 -18   9  117.39   26.76
  -1 -18   9   -5.26   17.63
   0 -18   9  -14.33   17.92
   3 -18   9   -3.00   32.60
   4 -18   9  -33.31   30.82
   5 -18   9   10.28   42.62
  -4 -17   9   17.40   13.96
  -3 -17   9   34.21   18.63
  -2 -17   9   94.86   26.84
  -1 -17   9  -21.02   16.40
   2 -17   9   57.72   39.98
   3 -17   9  -19.67   32.61
   4 -17   9   57.06   44.32
   5 -17   9  -11.40   38.81
  -4 -16   9    8.99   11.77
  -3 -16   9   84.48   21.89
  -2 -16   9   -2.08   13.75
   1 -16   9   26.88   32.95
   2 -16   9    7.53   31.01
   3 -16   9  130.95   51.38
   4 -16   9   -1.51   43.93
   5 -16   9   -7.30   39.51
   6 -16   9  -70.51   37.48
   7  15  -9   53.95   31.03
  -4 -15   9    5.27   11.73
  -3 -15   9   79.91   20.00
  -2 -15   9   21.13   15.65
   0 -15   9   -4.81   26.28
   1 -15   9   22.44   32.13
   2 -15   9  -20.47   31.64
   3 -15   9  -39.95   32.59
   4 -15   9  -23.75   36.05
   5 -15   9  -47.67   33.46
   6 -15   9  -38.84   33.33
   7 -15   9  -51.33   34.40
   8  14  -9  -18.60   29.56
   6  14  -9   60.36   26.53
  -4 -14   9   70.85   17.70
  -3 -14   9  149.28   24.39
  -1 -14   9   32.06   29.99
   0 -14   9   -1.34   33.21
   1 -14   9  274.03   69.76
   2 -14   9  -19.98   32.18
   3 -14   9   12.19   37.96
   4 -14   9  -25.45   28.88
   5 -14   9   -0.87   38.22
   6 -14   9  -27.67   35.32
   7 -14   9  -39.00   32.04
   8  13  -9  -22.91   22.37
   7  13  -9  -29.60   21.36
   6  13  -9    4.63   19.18
   5  13  -9   60.20   20.42
  -4 -13   9  113.37   20.08
   4  13  -9  136.03   19.93
  -2 -13   9   40.94   27.75
  -1 -13   9   -0.68   28.98
   0 -13   9  352.61   82.04
   1 -13   9  -22.12   37.44
   2 -13   9  387.77   69.34
   3 -13   9  -22.88   37.65
   4 -13   9  118.11   49.94
   5 -13   9  -40.63   30.75
   6 -13   9   23.83   38.40
   7 -13   9  -54.89   28.79
   8 -13   9  -53.42   30.62
   9  12  -9  -37.92   26.13
   8  12  -9   -1.50   24.78
   7  12  -9   -6.94   21.92
   6  12  -9  193.68   27.09
   5  12  -9   33.70   16.61
  -4 -12   9  239.35   29.77
   4  12  -9  264.70   27.15
   3  12  -9   62.74   16.09
  -2 -12   9    5.01   29.62
  -1 -12   9   77.03   46.84
   0 -12   9  230.62   71.78
   1 -12   9  380.69   84.42
   2 -12   9  -18.61   33.68
   3 -12   9   -4.18   38.62
   4 -12   9  -19.47   24.23
   5 -12   9   20.81   36.42
   6 -12   9  -25.69   28.41
   7 -12   9  -47.38   28.20
   8 -12   9  -32.94   30.12
   9  11  -9  101.31   36.63
   8  11  -9  -27.61   20.46
   7  11  -9  162.21   34.78
   6  11  -9    0.83   17.22
   5  11  -9  330.24   32.05
   4  11  -9   89.91   19.73
  -4 -11   9   45.70   13.64
   3  11  -9   84.49   17.22
  -2 -11   9   95.93   37.08
   2  11  -9   99.08   14.28
  -1 -11   9  375.15   67.32
   0 -11   9  132.84   64.79
   1 -11   9  243.40   73.07
   2 -11   9  109.89   51.90
   3 -11   9  -32.53   30.38
   4 -11   9   85.22   41.19
   5 -11   9  -40.64   28.14
   6 -11   9  -33.07   24.17
   7 -11   9  -13.38   28.60
   9  10  -9    3.41   30.51
   8  10  -9  -14.36   23.53
   7  10  -9   14.13   18.74
   6  10  -9   22.78   17.86
   5  10  -9  232.01   26.22
   4  10  -9    1.95   10.47
   3  10  -9  178.70   19.62
   2  10  -9   52.79   11.89
  -2 -10   9   11.47   29.46
  -1 -10   9  407.62   70.60
   0 -10   9  244.16   76.78
   1 -10   9  786.73  109.59
   2 -10   9   19.54   34.67
   3 -10   9  389.46   63.64
   4 -10   9    6.29   26.19
   5 -10   9  249.59   48.90
   6 -10   9  -38.23   24.18
   7 -10   9   16.89   31.11
   8 -10   9  -37.25   25.71
   9 -10   9  -54.56   28.05
   9   9  -9   -4.02   26.06
   8   9  -9   31.95   24.95
   7   9  -9  171.17   33.42
   6   9  -9   32.69   18.03
   5   9  -9   55.84   17.18
   4   9  -9   89.61   15.61
   3   9  -9  108.03   14.91
   2   9  -9   69.15   11.89
  -1  -9   9   45.89   39.06
  -1  -9   9   16.70   11.66
   0  -9   9  272.31   83.06
   1  -9   9   25.57   41.95
   2  -9   9  265.03   65.12
   3  -9   9   -2.69   25.60
   4  -9   9   94.37   39.90
   5  -9   9   44.43   33.17
   6  -9   9   63.83   37.24
   7  -9   9  -31.10   23.04
   8  -9   9  -33.67   27.12
  10   8  -9   54.95   35.85
   9   8  -9  -17.75   27.81
   8   8  -9  268.10   34.92
   7   8  -9   -3.39   15.83
   6   8  -9  413.17   38.11
   5   8  -9   72.67   17.94
   4   8  -9  360.12   31.60
   3   8  -9   76.98   12.48
   2   8  -9  584.71   43.10
  -1  -8   9  214.33   54.28
  -1  -8   9  181.65   19.20
   0  -8   9  302.17   73.19
   1  -8   9  179.55   62.44
   2  -8   9  134.11   47.33
   3  -8   9  222.62   52.83
   4  -8   9  -31.97   17.57
   5  -8   9  -26.24   21.24
   6  -8   9  -30.49   24.79
   7  -8   9  -35.67   19.40
   8  -8   9  -12.17   25.54
   9  -8   9  -50.82   27.06
   9   7  -9    9.59   28.48
   8   7  -9   49.14   26.35
   7   7  -9  126.76   27.69
   6   7  -9  286.50   29.99
   5   7  -9  243.78   25.31
   4   7  -9    5.41   10.03
   3   7  -9  114.62   15.03
   2   7  -9  373.26   29.61
  -1  -7   9  -10.39    9.75
   0  -7   9  941.76  106.20
   1  -7   9   20.42   17.37
   1  -7   9  -16.91   30.18
   2  -7   9  498.76   67.66
   3  -7   9    9.09   23.13
   4  -7   9  638.27   72.98
   5  -7   9  -13.18   20.93
   6  -7   9  107.57   40.48
   7  -7   9  -37.66   22.80
   8  -7   9    8.10   29.20
   9  -7   9  -51.50   30.98
  10   6  -9  -25.82   29.62
   9   6  -9  -14.33   19.55
   8   6  -9  148.70   33.44
   7   6  -9   78.45   23.43
   6   6  -9   27.20   15.13
   4   6  -9   80.34   17.46
   3   6  -9  100.41   14.41
   2   6  -9  252.15   21.87
  -1  -6   9 1261.53   86.73
   0  -6   9   12.27   13.26
   0  -6   9   23.60   25.39
   1  -6   9  286.42   50.84
   2  -6   9  333.36   51.42
   2  -6   9  208.31   28.16
   3  -6   9  416.40   55.09
   4  -6   9    0.22   21.54
   5  -6   9  191.65   43.33
   6  -6   9  -26.23   19.88
   7  -6   9   57.49   39.30
   9  -6   9  -41.21   27.49
  10   5  -9  -15.28   27.95
   9   5  -9  108.64   33.73
   8   5  -9   28.48   22.44
   7   5  -9  266.22   30.03
   6   5  -9  182.52   24.17
   5   5  -9   66.71   17.12
   4   5  -9   40.19   14.39
   3   5  -9 1107.76   77.05
   2   5  -9  239.38   20.75
  -1  -5   9  330.36   28.36
   0  -5   9  -19.99   11.77
   1  -5   9   26.25   22.84
   1  -5   9    0.85   16.97
   2  -5   9   28.88   21.55
   2  -5   9   98.97   33.43
   3  -5   9  -15.41   15.59
   3  -5   9  -11.24   18.20
   4  -5   9    7.66   20.69
   5  -5   9   10.03   22.97
   6  -5   9  -25.59   19.45
   8  -5   9  -23.30   27.50
   9  -5   9  -26.33   31.08
  10   4  -9   -2.54   24.56
   9   4  -9   22.84   25.00
   8   4  -9  217.02   28.97
   7   4  -9    7.51   15.70
   6   4  -9  273.84   29.51
   5   4  -9   44.71   14.84
   4   4  -9  254.62   24.76
   3   4  -9  712.03   51.64
  -2  -4   9 1360.13   93.10
  -1  -4   9  836.89   60.07
   0  -4   9   -1.61   13.18
   1  -4   9 1268.07  101.49
   1  -4   9 1485.99  122.02
   2  -4   9  367.07   48.87
   3  -4   9  524.32   57.39
   3  -4   9  425.02   44.42
   4  -4   9  -26.13   17.56
   4  -4   9  -12.90   16.80
   5  -4   9   38.61   24.58
   6  -4   9  -19.67   18.27
   7  -4   9   85.47   39.55
   9  -4   9  -48.62   29.75
  11   3  -9  -13.13   29.11
  10   3  -9  -10.56   20.19
  10   3  -9   -1.89   23.95
   9   3  -9  121.74   35.25
   9   3  -9  132.58   31.55
   8   3  -9   67.30   24.30
   8   3  -9   25.96   22.64
   7   3  -9   43.70   19.57
   6   3  -9  141.83   20.14
   5   3  -9  639.33   49.95
   4   3  -9  548.06   42.68
   3   3  -9   35.81   10.46
  -2  -3   9 1293.47   88.92
  -1  -3   9  147.95   19.02
   0  -3   9 2244.88  153.73
   1  -3   9  107.42   28.51
   1  -3   9   73.24   25.30
   3  -3   9   -2.64   16.91
   4  -3   9  341.41   43.48
   4  -3   9  258.19   37.34
   5  -3   9  106.61   34.76
   5  -3   9   45.32   28.53
   6  -3   9  216.48   47.95
   7  -3   9   13.55   33.06
   8  -3   9   42.71   38.00
   9  -3   9  -46.16   26.07
  11   2  -9   -6.49   23.79
  10   2  -9  207.21   47.47
  10   2  -9  149.70   36.18
   9   2  -9   74.28   25.46
   9   2  -9   44.44   26.75
   8   2  -9  271.40   32.16
   8   2  -9  253.38   39.30
   7   2  -9   73.77   21.59
   7   2  -9   10.60   19.74
   6   2  -9  371.55   44.11
   6   2  -9  427.45   37.51
   5   2  -9  119.59   18.60
   4   2  -9  800.37   58.54
  -3  -2   9    6.67    9.10
  -1  -2   9  297.60   27.17
   0  -2   9  108.60   24.47
   1  -2   9    7.10   23.94
   2  -2   9   -5.26   22.36
   2  -2   9    7.82   15.32
   3  -2   9   -1.01   20.15
   3  -2   9   58.46   23.44
   4  -2   9  -26.02   22.47
   4  -2   9  -13.60   16.63
   5  -2   9    6.22   18.74
   6  -2   9   15.31   32.39
   6  -2   9   24.94   29.81
   7  -2   9  -26.80   27.30
   8  -2   9   20.98   35.56
   9  -2   9  -54.77   28.13
  11   1  -9   43.83   31.84
  11   1  -9   87.46   32.86
  10   1  -9    2.82   22.38
  10   1  -9   -4.30   22.32
   9   1  -9  197.30   36.73
   9   1  -9  177.69   27.61
   8   1  -9   29.04   20.46
   8   1  -9   19.28   21.47
   7   1  -9  300.50   40.48
   7   1  -9  316.61   32.80
   6   1  -9   22.25   15.26
   6   1  -9  -13.34   14.94
   5   1  -9  754.54   54.43
   5   1  -9  644.71   61.89
   4   1  -9  413.03   34.03
  -3  -1   9  304.44   26.54
  -2  -1   9  219.58   21.63
  -1  -1   9  914.72   66.65
   0  -1   9  387.40   38.80
   1  -1   9   29.60   29.03
   3  -1   9   99.04   27.68
   3  -1   9   13.61   27.35
   4  -1   9   60.23   34.05
   4  -1   9  125.32   31.00
   5  -1   9   -3.41   18.32
   6  -1   9  232.73   52.96
   6  -1   9  234.66   43.68
   7  -1   9   30.54   28.85
   7  -1   9  -24.54   35.43
   8  -1   9  -38.12   20.91
  11   0  -9   -8.15   25.39
  11   0  -9   13.82   25.17
  10   0  -9   -5.78   23.00
  10   0  -9   -9.04   20.80
   9   0  -9   44.86   21.98
   9   0  -9   14.50   23.48
   8   0  -9    8.65   18.39
   8   0  -9    8.02   16.93
   7   0  -9   35.55   18.98
   7   0  -9   67.70   21.76
   6   0  -9  -16.39   10.10
   6   0  -9  -15.24   12.73
   5   0  -9  229.55   24.24
   5   0  -9  206.18   29.26
  -4   0   9   11.48   12.69
   4   0  -9   -3.27   10.35
  -3   0   9 1021.80   72.51
  -1   0   9  120.79   17.26
   0   0   9  -13.82   16.99
   1   0   9 2614.94  186.90
   2   0   9    5.60   12.79
   2   0   9  -13.20   27.31
   3   0   9  896.58   83.43
   3   0   9 1094.15   87.98
   4   0   9  -10.64   14.67
   5   0   9  348.60   46.83
   5   0   9  439.31   50.20
   6   0   9   -9.32   20.11
   7   0   9  237.03   49.79
   7   0   9  112.54   50.91
  11  -1  -9   55.62   31.12
  11  -1  -9   50.88   26.58
  10  -1  -9   16.49   24.71
  10  -1  -9    7.56   19.60
   9  -1  -9  192.05   28.46
   9  -1  -9  191.82   35.72
   8  -1  -9   33.74   19.72
   8  -1  -9   18.68   19.54
   7  -1  -9  325.15   33.95
   7  -1  -9  333.56   41.45
   6  -1  -9    2.61   13.07
   6  -1  -9   14.72   14.81
  -5   1   9  726.82   56.76
   5  -1  -9  737.08   63.84
  -4   1   9  434.36   36.43
   4  -1  -9  402.66   39.91
   3  -1  -9  340.19   31.79
  -3   1   9  270.30   26.80
  -1   1   9  878.12   65.95
   0   1   9  435.07   42.45
   1   1   9  156.59   40.03
   2   1   9  626.09   62.47
   2   1   9  554.82   53.99
   3   1   9  119.15   37.16
   3   1   9  111.24   24.55
   4   1   9  107.97   41.90
   4   1   9  139.73   31.32
   5   1   9   18.39   21.09
   6   1   9  203.99   53.17
   6   1   9  303.64   44.82
   7   1   9    2.90   40.82
   7   1   9   58.31   32.96
  10  -2  -9  174.44   42.79
   9  -2  -9   16.05   22.96
   9  -2  -9   26.21   19.01
   8  -2  -9  226.91   28.35
   8  -2  -9  243.90   35.93
   7  -2  -9   -6.64   14.44
  -6   2   9  416.63   39.79
   6  -2  -9  420.96   44.35
  -5   2   9  112.11   22.31
   5  -2  -9   44.38   16.55
   4  -2  -9  585.69   54.55
  -4   2   9  725.08   51.76
  -3   2   9   10.91   11.99
  -2   2   9   92.77   18.03
  -1   2   9  344.58   34.55
   0   2   9  213.22   31.51
   1   2   9   13.32   23.20
   2   2   9   14.85   12.60
   2   2   9   47.56   28.26
   3   2   9   76.55   22.28
   3   2   9   81.27   34.90
   4   2   9  -15.49   24.91
   4   2   9   -7.73   14.79
   5   2   9  -51.40   31.10
   5   2   9   20.23   21.93
   6   2   9   66.52   42.04
   6   2   9   79.66   31.55
   8   2   9    9.66   39.77
 -11   3   9  -57.60   35.27
  10  -3  -9  -18.37   19.53
   9  -3  -9  139.72   36.24
  -8   3   9   19.92   22.28
   8  -3  -9    3.27   17.19
  -7   3   9  -19.04   19.60
   7  -3  -9   -7.34   13.87
   6  -3  -9  104.56   22.73
  -6   3   9   97.08   25.64
  -5   3   9  598.64   50.03
   5  -3  -9  648.68   55.82
   4  -3  -9  537.46   48.83
  -4   3   9  582.49   45.88
  -3   3   9   49.67   15.15
   3  -3  -9   40.11   13.43
  -2   3   9 1226.72   86.57
   2  -3  -9 1147.44   88.99
  -1   3   9  179.47   25.92
   0   3   9 2414.71  173.21
   1   3   9  164.28   42.06
   2   3   9 1306.11  109.66
   3   3   9   14.52   15.22
   3   3   9   47.23   35.89
   4   3   9  445.07   47.08
   4   3   9  413.51   52.39
   5   3   9   36.73   33.29
   5   3   9  159.87   33.76
   6   3   9  119.45   51.53
   7   3   9  -48.56   35.82
   8   3   9  -55.01   34.71
 -10   4   9   10.82   32.47
  10  -4  -9   19.47   22.92
   9  -4  -9   -0.02   19.88
  -9   4   9  -22.02   24.33
  -8   4   9  200.39   30.28
   8  -4  -9  198.36   31.80
  -7   4   9  -14.60   15.76
   7  -4  -9   -2.66   14.29
   6  -4  -9  222.81   29.41
  -6   4   9  221.57   27.99
   5  -4  -9   49.16   16.38
  -5   4   9   71.30   18.62
   4  -4  -9  257.95   29.03
  -4   4   9  292.09   29.98
   3  -4  -9  745.41   62.63
  -3   4   9  841.83   61.97
   2  -4  -9 1400.01  107.49
  -2   4   9 1525.17  105.69
  -1   4   9 1002.47   79.74
   0   4   9    5.09   29.19
   1   4   9 1480.00  121.72
   2   4   9  466.85   57.65
   3   4   9  748.30   75.72
   3   4   9  694.24   63.59
   4   4   9   -3.84   15.20
   4   4   9  -11.52   30.76
   5   4   9   13.87   42.09
   6   4   9  -22.43   32.31
   7   4   9   44.31   41.48
  10  -5  -9  -17.35   20.16
 -10   5   9  -30.13   25.38
   9  -5  -9  111.03   31.82
  -9   5   9  115.96   33.25
  -8   5   9    1.19   21.10
   8  -5  -9   -6.84   14.08
  -7   5   9  210.74   29.16
   7  -5  -9  225.30   30.97
  -6   5   9  178.82   25.23
   6  -5  -9  147.99   24.21
  -5   5   9   86.53   22.10
   5  -5  -9   54.82   17.41
   4  -5  -9   24.95   13.37
  -4   5   9   44.69   17.39
   3  -5  -9 1252.27   88.04
  -3   5   9 1051.05   85.12
  -2   5   9  242.69   30.38
   2  -5  -9  181.00   38.63
   2  -5  -9  274.70   25.29
  -1   5   9  567.15   57.69
   0   5   9   -9.23   33.29
   0  -5  -9   11.20   17.94
   1   5   9   44.02   36.04
   2   5   9  134.62   46.80
   3   5   9   24.15   16.54
   3   5   9   -6.26   37.30
   4   5   9   15.22   43.97
   5   5   9    4.52   37.36
  10  -6  -9    3.70   22.27
  -9   6   9    0.70   23.34
   9  -6  -9   -6.94   17.86
  -8   6   9  104.27   28.70
   8  -6  -9  107.90   28.01
   7  -6  -9   54.62   20.23
  -7   6   9   39.21   22.41
   6  -6  -9   20.44   13.89
  -6   6   9   26.26   19.98
  -5   6   9   55.52   18.96
   5  -6  -9   54.82   16.72
  -4   6   9  107.28   19.24
   4  -6  -9   67.51   17.11
  -3   6   9  112.11   27.80
   3  -6  -9   65.71   28.22
   3  -6  -9   88.41   15.14
   2  -6  -9  339.82   28.48
  -2   6   9  255.19   37.19
   2  -6  -9  244.10   43.21
   1  -6  -9 1160.14   84.42
   1  -6  -9 1000.59  110.27
  -1   6   9 1232.33   95.76
   0  -6  -9  -15.72   17.36
   0   6   9  -28.77   33.57
   1   6   9  290.23   62.19
   2   6   9  427.28   64.67
   3   6   9  702.62   77.68
   4   6   9  -26.87   41.59
   5   6   9  220.44   66.15
   6   6   9  -80.42   40.85
   7   6   9   21.41   43.41
  10  -7  -9   -1.36   21.01
   9  -7  -9   -3.75   16.30
  -8   7   9    1.48   21.84
   8  -7  -9   -0.09   16.25
   7  -7  -9   67.59   21.35
  -7   7   9   55.30   24.18
  -6   7   9  213.71   28.59
   6  -7  -9  246.59   30.06
  -5   7   9  234.99   29.49
   5  -7  -9  245.54   28.12
   4  -7  -9  -12.15   18.19
  -4   7   9   -5.52   15.65
   4  -7  -9    2.88    9.77
   3  -7  -9  115.26   16.39
   3  -7  -9   86.58   28.72
  -3   7   9  119.65   31.37
   2  -7  -9  447.20   35.50
  -2   7   9  423.04   48.32
   2  -7  -9  336.63   51.04
  -1   7   9  -17.75   35.28
   1  -7  -9   11.46    9.03
   1  -7  -9   16.02   20.48
   0   7   9  638.05   71.86
   0  -7  -9  506.30   64.33
  -1  -7  -9   -2.14   16.79
   1   7   9  -34.02   30.62
   2   7   9  637.02   76.06
   3   7   9   -7.31   36.53
  -3  -7  -9    6.40   23.91
   4   7   9 1104.44  105.24
   6   7   9   98.34   53.27
   8   7   9  -45.00   39.43
   9   7   9  -79.04   36.41
  10  -8  -9   55.42   28.36
   9  -8  -9   -9.49   15.67
   8  -8  -9  238.92   34.12
  -7   8   9   -3.09   19.99
   7  -8  -9   -2.36   13.42
   6  -8  -9  393.33   39.56
  -6   8   9  341.87   37.96
   5  -8  -9   37.01   15.82
  -5   8   9   27.71   20.57
   4  -8  -9  261.56   42.93
  -4   8   9  290.94   35.79
   4  -8  -9  342.66   31.09
  -3   8   9   90.27   31.33
   3  -8  -9   74.55   14.98
   3  -8  -9   53.33   23.34
   2  -8  -9  654.09   49.52
  -2   8   9  596.50   63.90
   2  -8  -9  590.35   67.92
   1  -8  -9  191.02   37.40
   1  -8  -9  258.79   24.00
  -1   8   9  278.73   60.57
   0   8   9  216.15   62.86
   0  -8  -9  121.36   31.38
   1   8   9  103.09   51.43
  -1  -8  -9   59.84   24.51
   2   8   9  166.51   58.61
  -2  -8  -9   77.11   27.76
   3   8   9  447.64   87.08
   4   8   9  -43.55   35.22
  -4  -8  -9  -10.26   20.35
   5   8   9  -21.81   39.15
   6   8   9  -79.50   45.46
   9   8   9  -83.16   39.29
   9  -9  -9   10.88   20.99
   8  -9  -9   14.08   18.11
   7  -9  -9  120.75   26.84
  -6   9   9   24.74   21.32
   6  -9  -9   25.08   15.65
  -5   9   9   39.99   24.70
   5  -9  -9   56.96   16.93
   4  -9  -9   61.39   24.26
  -4   9   9   98.89   31.94
   4  -9  -9  120.57   20.98
   3  -9  -9  115.48   16.31
   3  -9  -9  118.03   27.54
  -3   9   9  140.92   39.04
   2  -9  -9   68.54   13.00
  -2   9   9  120.30   41.50
   2  -9  -9   73.76   24.15
   1  -9  -9   34.60   21.51
  -1   9   9   63.50   45.22
   0  -9  -9  170.96   33.93
   0   9   9  258.12   66.68
  -1  -9  -9    1.72   15.76
   1   9   9   12.19   40.63
  -2  -9  -9  233.24   42.29
   2   9   9  380.90   64.67
  -3  -9  -9    0.07   19.74
   3   9   9  -13.80   38.60
  -4  -9  -9   89.13   31.32
   4   9   9  156.77   65.53
   5   9   9  104.36   57.73
   6   9   9  120.12   60.15
   7   9   9  -70.79   41.83
   8   9   9  -75.41   38.55
   9 -10  -9  -17.81   15.95
   8 -10  -9    5.20   18.73
   7 -10  -9   21.22   15.72
   6 -10  -9   10.28   13.54
   5 -10  -9  194.13   25.31
  -5  10   9  216.21   33.84
   4 -10  -9   -3.41   10.63
   4 -10  -9    1.18   16.29
  -4  10   9   16.78   26.07
   3 -10  -9  150.99   32.85
  -3  10   9  308.14   54.61
   3 -10  -9  172.04   21.89
  -2  10   9   54.46   44.27
   2 -10  -9   35.00   10.93
   2 -10  -9   32.43   19.28
  -1  10   9  517.62   67.94
   1 -10  -9  352.65   35.65
   0 -10  -9   88.02   27.61
   0  10   9  192.94   63.61
   1  10   9  732.36   85.39
  -2 -10  -9   53.53   24.00
   2  10   9   93.43   54.27
   3  10   9  756.28   88.47
  -4 -10  -9    0.87   20.54
   4  10   9   -0.38   48.59
   5  10   9  378.60   62.99
  -5 -10  -9  257.61   47.18
   6  10   9  -91.95   42.76
   7  10   9   12.59   60.94
   9 -11  -9   77.17   27.80
   8 -11  -9   -8.01   15.99
   7 -11  -9  133.01   28.29
   6 -11  -9   17.78   13.24
   5 -11  -9  309.24   32.97
   4 -11  -9   66.62   24.38
   4 -11  -9   79.90   17.51
   3 -11  -9   88.11   14.33
  -3  11   9   59.34   43.96
   2 -11  -9  119.64   30.43
  -2  11   9  250.45   63.58
  -1  11   9  501.83   70.71
   0  11   9  283.29   71.84
   1  11   9  303.64   72.98
  -1 -11  -9  180.09   37.41
  -2 -11  -9  133.43   33.07
   2  11   9  203.34   74.54
  -3 -11  -9  -17.23   16.08
   3  11   9  -50.86   44.86
   4  11   9   92.90   67.26
  -4 -11  -9   59.41   28.04
  -5 -11  -9   10.79   22.62
   6  11   9  -44.55   47.47
   7  11   9  -71.95   43.32
   8  11   9  -67.66   43.71
   8 -12  -9   25.40   19.77
   7 -12  -9    0.40   14.08
   6 -12  -9  147.65   23.48
   5 -12  -9   45.29   15.44
   4 -12  -9  247.23   39.65
   4 -12  -9  244.32   27.24
   3 -12  -9   58.41   15.02
   3 -12  -9   54.35   22.99
  -2  12   9   64.72   54.09
   2 -12  -9   40.86   21.15
   1 -12  -9   49.88   24.16
  -1  12   9  110.16   59.81
   0  12   9  307.87   72.44
   1  12   9  381.15   67.50
  -1 -12  -9  228.71   40.88
  -2 -12  -9   14.23   21.75
   2  12   9   35.14   50.33
  -3 -12  -9   31.48   23.20
   3  12   9   10.37   60.00
   4  12   9  -66.40   43.36
  -4 -12  -9   -2.47   17.92
  -5 -12  -9  102.08   34.56
   5  12   9   67.58   60.95
  -6 -12  -9    4.13   25.51
   6  12   9  -72.70   47.23
   8 -13  -9   10.56   19.56
   7 -13  -9   10.35   16.83
   6 -13  -9   13.43   13.95
   5 -13  -9   66.39   17.92
   4 -13  -9  136.39   19.56
   4 -13  -9  128.29   29.52
   3 -13  -9    7.80   18.34
   2 -13  -9  107.53   28.71
   1 -13  -9    1.68   16.95
  -1  13   9  -26.80   47.96
   0  13   9  593.78   81.77
   1  13   9   14.65   50.77
  -1 -13  -9  -17.99   15.03
   2  13   9  665.75   87.94
   3  13   9    6.35   57.10
  -3 -13  -9   -1.66   21.25
   4  13   9  176.33   68.72
  -4 -13  -9   98.68   32.56
   5  13   9  -95.91   45.24
  -5 -13  -9  -13.90   18.56
  -6 -13  -9   84.81   33.45
   6  13   9   97.80   64.00
   8 -14  -9   25.99   22.81
   7 -14  -9   -4.44   15.84
   6 -14  -9   53.13   19.69
   5 -14  -9    9.97   12.31
   3 -14  -9  164.32   31.10
   2 -14  -9   20.01   18.11
   1 -14  -9   51.59   21.95
   0 -14  -9   14.35   17.60
   0  14   9   10.57   50.82
   1  14   9  382.26   68.75
   2  14   9  -45.51   40.84
  -2 -14  -9  -15.16   17.57
   3  14   9   22.29   60.39
  -3 -14  -9   20.66   24.77
  -4 -14  -9   -3.53   19.11
   4  14   9  -94.51   55.16
  -5 -14  -9   86.67   33.39
   5  14   9   18.69   65.56
  -6 -14  -9    1.04   23.05
   7  14   9 -101.79   50.53
   7 -15  -9   58.51   22.04
   6 -15  -9   -1.17   13.43
   3 -15  -9   82.79   27.85
   2 -15  -9   20.35   19.98
   1 -15  -9   38.72   21.60
   0 -15  -9   -2.49   15.11
  -1 -15  -9   27.98   22.39
   1  15   9   87.39   61.30
  -2 -15  -9  -13.64   15.16
   2  15   9   24.24   58.35
  -3 -15  -9   -8.34   17.84
   3  15   9    0.75   57.38
   4  15   9  -33.98   58.97
  -4 -15  -9   14.16   22.51
   5  15   9  -83.06   60.24
  -5 -15  -9    2.00   23.82
  -6 -15  -9   21.57   28.92
   6  15   9  -84.32   54.93
   3 -16  -9   66.42   26.67
   2 -16  -9    9.23   18.41
   1 -16  -9  169.34   33.27
   0 -16  -9   -9.44   16.60
  -1 -16  -9   43.77   24.23
   2  16   9   56.00   60.18
  -2 -16  -9   11.14   20.98
   3  16   9  270.67   82.25
  -3 -16  -9  165.95   41.10
   4  16   9  -40.57   62.20
  -4 -16  -9    0.82   22.15
   5  16   9  -35.49   57.00
  -5 -16  -9   21.18   25.61
   6  16   9 -125.64   61.73
  -6 -16  -9   -3.17   23.39
   3 -17  -9   18.91   22.33
   2 -17  -9   73.94   27.77
   1 -17  -9   -2.17   18.20
   0 -17  -9   47.95   25.35
  -1 -17  -9   -2.96   16.22
  -2 -17  -9   96.75   31.61
  -3 -17  -9    4.64   20.14
   3  17   9   42.46   65.31
   4  17   9  117.40   74.49
  -4 -17  -9   94.64   32.32
  -5 -17  -9   -2.63   25.14
   5  17   9  -65.00   56.82
   6  17   9  -19.79   63.87
  -6 -17  -9   50.14   34.08
   3 -18  -9  -10.83   18.72
   2 -18  -9  100.07   31.21
   1 -18  -9    6.20   19.29
   0 -18  -9   11.89   20.93
  -1 -18  -9   -6.23   15.89
  -2 -18  -9   37.69   24.88
  -3 -18  -9   11.47   21.37
   4  18   9  -23.56   61.19
  -4 -18  -9   -3.98   20.39
   5  18   9  -36.46   67.18
  -5 -18  -9    5.48   24.54
   3 -19  -9   27.24   23.31
   2 -19  -9   61.14   25.79
   1 -19  -9   11.39   21.37
  -1 -19  -9    6.38   21.97
  -2 -19  -9   28.68   25.39
  -3 -19  -9    7.26   20.60
  -4 -19  -9   36.06   26.37
   2 -20  -9    9.37   21.93
   1 -20  -9   96.78   30.78
   0 -20  -9   16.84   20.74
  -1 -20  -9   24.75   23.03
  -2 -20  -9    5.08   21.88
  -1 -20  10   -5.68   20.84
   0 -20  10   -9.92   19.76
  -3 -19  10   -4.25   15.35
  -2 -19  10   59.67   27.29
  -1 -19  10    0.65   23.27
   0 -19  10   35.82   24.63
   1 -19  10  -11.72   20.32
  -4 -18  10   -4.41   12.77
  -3 -18  10   47.81   21.87
  -2 -18  10    0.61   16.88
  -1 -18  10  217.97   38.92
   2 -18  10   -0.17   31.77
   3 -18  10   52.81   45.41
   4 -18  10  -65.12   40.45
  -4 -17  10   17.78   13.94
  -3 -17  10    9.63   16.80
  -2 -17  10   52.36   23.85
   1 -17  10  -15.24   28.36
   2 -17  10  -25.05   35.14
   3 -17  10   -7.60   40.31
   4 -17  10  -12.13   49.88
   5 -17  10  -61.94   41.84
  -4 -16  10    7.47   12.90
  -3 -16  10   59.73   19.45
  -2 -16  10    0.80   16.51
   1 -16  10   41.39   39.88
   2 -16  10  -25.89   33.99
   3 -16  10   -3.59   42.63
   4 -16  10  -16.61   49.11
   5 -16  10  -44.66   38.85
  -4 -15  10  131.19   22.91
  -3 -15  10  -10.81   10.36
   0 -15  10   95.91   44.45
   1 -15  10  -13.72   29.59
   2 -15  10  135.52   64.85
   3 -15  10  -24.13   37.97
   4 -15  10   21.87   46.75
   5 -15  10  -34.77   35.74
   6 -15  10  -65.50   40.54
   7  14 -10   -6.88   24.06
   6  14 -10  -19.97   17.42
  -4 -14  10   49.18   15.64
  -1 -14  10   90.64   42.50
   0 -14  10  -33.33   31.41
   1 -14  10  138.88   62.31
   2 -14  10    1.81   46.69
   3 -14  10   47.87   46.88
   4 -14  10  -57.09   34.08
   5 -14  10  -13.25   39.94
   6 -14  10  -45.87   34.55
   8  13 -10  -12.83   22.33
   7  13 -10   36.88   27.41
   6  13 -10  -14.79   17.89
   5  13 -10  265.72   29.77
  -4 -13  10   14.89   11.67
  -2 -13  10  -14.54   23.49
  -1 -13  10   -5.23   35.36
   0 -13  10  -22.28   43.62
   1 -13  10  -17.29   40.44
   2 -13  10  -18.99   40.58
   3 -13  10   42.71   53.21
   4 -13  10  -32.16   33.42
   5 -13  10  -55.67   30.59
   6 -13  10  -59.09   30.99
   7 -13  10  -44.93   34.64
   8  12 -10   -9.68   23.34
   7  12 -10   12.41   24.01
   6  12 -10   10.69   18.59
   5  12 -10  131.65   21.17
   4  12 -10   38.11   16.22
  -3 -12  10  201.63   36.09
  -2 -12  10   11.99   30.19
  -1 -12  10  335.66   77.66
   0 -12  10   20.00   51.32
   1 -12  10  561.78   98.77
   2 -12  10   24.77   50.58
   3 -12  10   88.60   56.83
   4 -12  10  -43.94   34.28
   5 -12  10  -34.00   30.49
   6 -12  10  -46.68   31.03
   7 -12  10  -44.71   27.61
   9  11 -10  -31.27   23.94
   8  11 -10   91.99   31.26
   7  11 -10   24.78   23.18
   6  11 -10   14.42   16.44
   5  11 -10   37.47   16.19
   4  11 -10  407.11   35.96
   3  11 -10   16.30   11.12
  -2 -11  10  245.50   46.76
  -1 -11  10   59.39   45.86
   0 -11  10  598.87  102.00
   1 -11  10   36.17   59.30
   2 -11  10  619.18   96.60
   3 -11  10  -34.19   32.72
   4 -11  10   21.06   38.24
   5 -11  10  -25.04   29.08
   6 -11  10    5.00   35.43
   7 -11  10  -35.42   27.44
   9  10 -10  -13.76   28.35
   8  10 -10  115.77   35.14
   7  10 -10   -4.32   17.14
   6  10 -10  139.35   27.59
   5  10 -10   14.88   15.03
   4  10 -10   32.91   14.28
   3  10 -10   52.44   14.21
   2  10 -10   15.54    9.81
  -2 -10  10    4.50   24.03
  -1 -10  10   10.23   33.31
   0 -10  10  -29.82   48.63
   1 -10  10  413.79  102.01
   2 -10  10   22.98   43.03
   3 -10  10   30.49   38.00
   4 -10  10   -1.62   31.36
   5 -10  10  -32.95   24.38
   6 -10  10   26.17   36.35
   7 -10  10  -33.29   24.39
   8 -10  10  -31.24   27.90
   9   9 -10   42.01   31.68
   8   9 -10  -11.50   19.68
   7   9 -10   10.94   20.05
   6   9 -10  248.09   27.76
   5   9 -10   50.75   16.05
   4   9 -10  404.04   34.35
   3   9 -10   -8.33    7.96
   2   9 -10  260.50   23.31
  -1  -9  10   17.93   13.12
  -1  -9  10  -18.88   25.55
   0  -9  10  928.22  119.55
   1  -9  10   49.05   50.32
   2  -9  10  260.65   70.93
   3  -9  10   55.32   40.19
   4  -9  10  214.47   55.35
   5  -9  10  -22.58   24.01
   6  -9  10  -15.87   27.52
   7  -9  10  -13.94   30.63
   8  -9  10  -50.18   25.72
   9   8 -10  -18.35   26.10
   8   8 -10   48.72   26.29
   7   8 -10  185.05   32.75
   6   8 -10  110.40   24.18
   5   8 -10  355.30   32.65
   4   8 -10    0.89    9.09
   3   8 -10  194.15   20.25
   2   8 -10  128.42   15.87
  -1  -8  10  710.02   52.56
   0  -8  10   51.69   38.46
   0  -8  10   81.83   20.73
   1  -8  10  782.94  104.03
   2  -8  10   44.95   43.56
   3  -8  10  572.30   75.67
   4  -8  10   36.69   29.96
   5  -8  10  160.15   46.33
   6  -8  10  -43.98   22.04
   7  -8  10  -29.67   25.94
  10   7 -10  -18.95   23.68
   9   7 -10  -19.14   23.12
   8   7 -10   33.53   24.89
   7   7 -10  189.90   25.40
   6   7 -10   88.10   22.31
   5   7 -10   21.87   13.21
   4   7 -10  118.92   16.94
   3   7 -10  217.61   21.39
  -1  -7  10   -8.84   11.88
   0  -7  10   66.54   18.94
   0  -7  10   53.83   35.32
   1  -7  10  357.44   60.48
   1  -7  10  244.80   32.53
   2  -7  10  125.55   46.15
   3  -7  10   97.51   39.79
   4  -7  10   88.80   37.45
   5  -7  10  249.46   46.54
   6  -7  10   -4.66   29.79
   7  -7  10   22.07   37.40
   9  -7  10  -26.66   35.08
  10   6 -10   46.18   29.74
   9   6 -10  -12.35   20.56
   8   6 -10  182.24   28.85
   7   6 -10    5.04   17.82
   6   6 -10  244.45   27.22
   5   6 -10  101.48   16.25
   4   6 -10   42.94   13.20
   3   6 -10   52.09   12.59
  -2  -6  10  492.25   38.79
  -1  -6  10  351.85   31.15
   0  -6  10  295.68   28.54
   0  -6  10  204.43   47.55
   1  -6  10  279.46   56.79
   1  -6  10  155.51   33.20
   2  -6  10   -1.50   24.35
   2  -6  10   -6.89   18.03
   3  -6  10  442.35   59.22
   4  -6  10   37.51   28.09
   5  -6  10    7.22   23.86
   6  -6  10    2.32   33.55
   7  -6  10  -42.00   22.46
   8  -6  10  -39.64   24.77
  10  -6  10  -54.65   29.18
  10   5 -10   44.65   27.89
   9   5 -10   -1.78   20.54
   8   5 -10   60.22   25.36
   7   5 -10   18.60   19.35
   6   5 -10  498.71   43.09
   5   5 -10   88.75   15.38
   4   5 -10  154.46   18.68
   3   5 -10    1.12    7.85
  -2  -5  10 1577.89  107.73
  -1  -5  10   -6.68   12.23
   0  -5  10 1346.45   96.62
   1  -5  10  117.44   35.86
   1  -5  10  184.18   29.85
   2  -5  10  711.55   78.41
   3  -5  10   14.78   22.00
   3  -5  10    3.88   20.51
   4  -5  10  522.92   63.26
   5  -5  10   29.15   30.41
   6  -5  10  104.78   40.55
   8  -5  10   31.30   36.01
   9  -5  10  -57.62   29.47
  10  -5  10  -71.47   35.31
  10   4 -10   55.21   31.90
   9   4 -10   39.38   26.04
   8   4 -10  131.75   29.83
   7   4 -10  117.16   25.71
   6   4 -10   66.64   19.09
   5   4 -10  293.04   28.05
   4   4 -10   84.13   13.78
  -2  -4  10    2.50    9.54
  -1  -4  10 1250.30   87.65
   0  -4  10   94.19   25.47
   1  -4  10   75.05   31.88
   1  -4  10  110.53   32.51
   2  -4  10  125.01   34.69
   2  -4  10   78.19   28.29
   3  -4  10  360.28   41.44
   3  -4  10  453.89   54.10
   4  -4  10   43.90   32.29
   4  -4  10   94.47   31.87
   5  -4  10  110.53   36.92
   6  -4  10   13.55   29.20
   7  -4  10  -18.91   25.94
   8  -4  10  -13.79   35.48
   9  -4  10  -35.48   30.28
  10  -4  10  -53.81   31.48
  10   3 -10   17.08   24.43
   9   3 -10  149.12   26.37
   8   3 -10   70.10   24.72
   7   3 -10  218.21   27.23
   6   3 -10   11.67   14.35
   5   3 -10   90.84   15.44
   4   3 -10  291.77   26.69
  -3  -3  10  114.66   16.93
  -2  -3  10   57.45   15.66
  -1  -3  10   39.61   14.72
   0  -3  10   74.49   22.84
   1  -3  10  427.28   47.94
   1  -3  10  484.13   51.98
   2  -3  10   30.05   21.80
   2  -3  10  -59.54   27.35
   3  -3  10   79.96   30.26
   3  -3  10   51.09   28.56
   4  -3  10   28.04   30.78
   4  -3  10   59.32   27.63
   5  -3  10   -3.08   23.09
   5  -3  10   52.24   27.60
   6  -3  10   66.38   37.73
   7  -3  10   22.05   32.66
   8  -3  10  -52.37   28.55
   9  -3  10  -20.60   32.85
  10   2 -10   34.16   27.63
   9   2 -10  142.21   33.10
   9   2 -10  173.67   42.47
   8   2 -10   84.98   26.40
   8   2 -10   18.52   22.26
   7   2 -10  230.64   37.45
   7   2 -10  311.20   31.61
   6   2 -10  101.53   21.93
   5   2 -10  489.96   40.65
  -3  -2  10 1519.66  104.47
  -2  -2  10  291.77   26.32
  -1  -2  10  722.53   55.36
   0  -2  10  -23.38   17.28
   1  -2  10 2107.03  153.41
   2  -2  10    2.88   15.43
   3  -2  10  329.06   46.15
   3  -2  10  475.74   51.27
   4  -2  10   16.13   20.40
   4  -2  10  -15.07   22.25
   5  -2  10  271.63   40.54
   5  -2  10  107.28   36.90
   6  -2  10   29.72   29.35
   6  -2  10    7.59   26.11
   7  -2  10   99.78   41.82
  11   1 -10   22.66   27.25
  10   1 -10    1.65   23.38
  10   1 -10   17.21   22.20
   9   1 -10  189.22   42.12
   9   1 -10  164.21   28.49
   8   1 -10   93.75   31.22
   8   1 -10  116.54   29.19
   7   1 -10  130.70   20.79
   7   1 -10   36.04   26.04
   6   1 -10  105.34   27.89
   6   1 -10  154.34   21.76
   5   1 -10  349.66   31.89
  -4  -1  10  388.46   34.58
  -3  -1  10  147.35   17.47
  -2  -1  10  247.79   23.78
  -1  -1  10   94.55   18.82
   0  -1  10  705.44   58.79
   1  -1  10  -15.71   27.85
   2  -1  10  971.70   90.58
   2  -1  10 1182.76   94.38
   3  -1  10   59.64   23.90
   3  -1  10  -39.08   27.81
   4  -1  10   75.79   26.62
   4  -1  10   51.65   36.45
   5  -1  10   -1.65   20.01
   5  -1  10  -34.47   27.95
   6  -1  10  189.49   52.49
   6  -1  10  281.11   55.80
   7  -1  10   11.43   29.46
  11   0 -10   -8.01   21.97
  10   0 -10  155.85   27.48
  10   0 -10  183.05   44.14
   9   0 -10   37.13   26.55
   9   0 -10   32.37   22.17
   8   0 -10   50.44   22.76
   8   0 -10   50.51   25.63
   7   0 -10   34.80   20.17
   7   0 -10   -0.70   15.80
   6   0 -10   70.37   22.80
  -5   0  10   61.51   18.61
   5   0 -10   19.59   16.20
  -4   0  10  203.96   23.40
  -3   0  10   -8.93   11.49
  -2   0  10   95.25   14.64
  -1   0  10   -5.26   12.40
   0   0  10   66.42   25.10
   1   0  10   -5.68   24.56
   2   0  10  560.73   59.07
   2   0  10  523.75   53.23
   3   0  10  -15.77   14.96
   3   0  10  -56.53   26.56
   4   0  10  257.52   35.50
   4   0  10  137.78   41.23
   5   0  10  -22.20   19.89
   6   0  10  193.35   44.38
   6   0  10   93.43   43.25
   7   0  10  -23.34   26.31
   8   0  10    5.35   47.97
  10  -1 -10    7.20   20.38
   9  -1 -10  166.74   26.45
   9  -1 -10  160.10   39.26
   8  -1 -10  138.45   28.39
   8  -1 -10   75.46   26.13
   7  -1 -10   57.11   24.32
   6  -1 -10   94.06   25.78
  -6   1  10  115.99   27.42
  -5   1  10  443.89   37.59
   5  -1 -10  351.17   40.18
   4  -1 -10  335.77   36.72
  -4   1  10  399.29   33.68
  -3   1  10   91.79   18.68
  -2   1  10  213.26   23.78
  -1   1  10  100.00   20.49
   0   1  10  746.66   63.59
   1   1  10   41.45   28.29
   2   1  10 1291.37  108.28
   3   1  10   24.36   17.51
   3   1  10  -34.66   33.28
   4   1  10   53.15   34.19
   4   1  10  107.34   29.77
   5   1  10   -0.64   21.33
   5   1  10  -21.70   25.32
   6   1  10  169.39   50.71
   6   1  10  282.75   45.24
   7   1  10  -61.75   31.94
   8   1  10  -64.07   36.22
 -11   2  10  -33.35   39.70
  10  -2 -10   10.19   20.55
   9  -2 -10  102.66   31.54
  -8   2  10   44.67   24.66
   8  -2 -10   55.95   24.05
  -7   2  10  281.46   34.80
   7  -2 -10  286.23   37.70
   6  -2 -10   69.62   21.97
  -6   2  10  102.55   26.78
   5  -2 -10  471.55   46.86
  -5   2  10  506.10   42.75
  -4   2  10   48.89   17.12
   4  -2 -10   22.40   12.68
  -3   2  10 1550.13  105.77
   3  -2 -10 1460.75  112.87
  -2   2  10  293.03   29.33
  -1   2  10  733.16   59.25
   0   2  10   35.51   21.46
   1   2  10 2393.63  177.34
   3   2  10  423.75   56.82
   3   2  10  514.10   49.84
   4   2  10   20.35   19.10
   4   2  10   -0.88   30.08
   5   2  10  285.29   47.91
   5   2  10  363.19   46.02
   6   2  10  -12.72   28.41
   7   2  10   42.01   45.77
 -11   3  10   33.89   42.09
  10  -3 -10   -4.47   21.10
 -10   3  10  -42.06   28.93
  -9   3  10  207.72   43.36
   9  -3 -10  206.53   41.97
  -8   3  10   71.57   26.93
   8  -3 -10   46.97   23.64
  -7   3  10  203.59   29.65
   7  -3 -10  225.96   32.72
   6  -3 -10   19.24   16.70
  -6   3  10   33.93   21.04
   5  -3 -10   64.34   18.37
  -5   3  10   95.50   21.51
   4  -3 -10  315.48   33.12
  -4   3  10  330.76   31.77
  -3   3  10  193.80   22.67
   3  -3 -10  146.09   21.03
  -2   3  10   51.14   18.79
  -1   3  10   34.93   19.25
   0   3  10  155.99   37.33
   1   3  10  607.00   64.51
   2   3  10   34.82   31.03
   3   3  10  109.76   47.68
   3   3  10  144.95   26.90
   4   3  10   -1.34   35.80
   4   3  10   69.30   23.54
   5   3  10   83.68   43.74
   5   3  10   98.69   30.62
   6   3  10   25.97   40.78
   7   3  10   30.40   38.13
 -10   4  10   49.27   31.01
  -9   4  10  -12.85   21.72
   9  -4 -10  -10.71   17.95
   8  -4 -10   91.44   27.26
  -8   4  10  116.21   29.51
   7  -4 -10   84.33   24.68
  -7   4  10   80.71   28.86
  -6   4  10   50.10   20.71
   6  -4 -10   36.71   18.09
   5  -4 -10  274.16   31.92
  -5   4  10  294.80   30.31
  -4   4  10  121.44   23.26
   4  -4 -10  105.41   18.91
  -3   4  10  118.94   19.22
   3  -4 -10   51.90   15.72
  -2   4  10   12.89   16.72
   2  -4 -10    2.28    9.20
  -1   4  10 1217.34   94.31
   0   4  10  143.44   37.09
   1   4  10  101.08   43.74
   2   4  10  144.45   46.25
   3   4  10  513.79   65.64
   3   4  10  573.38   53.43
   4   4  10  143.02   55.42
   4   4  10  136.89   31.95
   5   4  10  117.57   49.74
   6   4  10  -27.28   38.47
   7   4  10  -67.58   36.26
   8   4  10  -64.60   43.92
 -10   5  10   45.10   33.13
  10  -5 -10   26.04   25.28
   9  -5 -10   11.10   16.56
  -9   5  10   11.68   25.27
  -8   5  10   49.88   26.11
   8  -5 -10   55.70   23.67
  -7   5  10   -0.59   17.34
   7  -5 -10   11.00   17.20
   6  -5 -10  539.42   51.46
  -6   5  10  528.90   47.83
  -5   5  10  120.03   24.88
   5  -5 -10   90.65   21.07
  -4   5  10  204.75   25.12
   4  -5 -10  154.82   22.14
  -3   5  10   -5.15   16.20
   3  -5 -10   -7.15    7.59
  -2   5  10 1432.17  106.75
   2  -5 -10 1439.11  106.40
  -1   5  10   -3.78   22.77
   0   5  10 1399.03  115.05
   1   5  10  139.09   49.72
   2   5  10 1116.09  107.16
   3   5  10  -21.87   30.87
   3   5  10   13.51   15.28
   4   5  10  616.29   72.81
   5   5  10   -5.81   46.52
   6   5  10   57.53   49.05
   8   5  10  -18.30   43.19
  10  -6 -10   71.68   31.13
   9  -6 -10   -2.43   17.97
  -9   6  10   -6.66   22.58
   8  -6 -10  157.37   28.32
  -8   6  10  141.62   33.02
  -7   6  10  -12.48   18.69
   7  -6 -10    4.91   15.04
  -6   6  10  193.07   27.56
   6  -6 -10  232.63   29.58
   5  -6 -10   96.48   19.45
  -5   6  10  152.13   28.74
  -4   6  10   53.78   19.33
   4  -6 -10   32.07   13.35
   3  -6 -10   26.84   12.10
  -3   6  10   33.10   19.84
   2  -6 -10  558.26   46.21
  -2   6  10  551.57   54.12
  -1   6  10  576.16   60.18
   1  -6 -10  548.25   69.60
   0  -6 -10  112.63   36.17
   0   6  10  214.38   58.49
   1   6  10  221.40   59.52
   2   6  10  -43.98   39.07
   3   6  10  530.35   70.90
   4   6  10   37.33   52.05
   5   6  10   60.08   48.88
   6   6  10   -2.52   43.23
  10  -7 -10  -16.41   18.80
   9  -7 -10   32.72   22.74
   8  -7 -10   19.31   18.66
  -8   7  10   34.29   24.51
  -7   7  10  162.10   27.42
   7  -7 -10  185.00   27.82
  -6   7  10   67.63   24.91
   6  -7 -10   64.80   19.52
   5  -7 -10   24.62   13.29
  -5   7  10   20.66   21.30
   4  -7 -10  109.08   19.49
  -4   7  10  174.72   31.83
  -3   7  10  194.35   30.22
   3  -7 -10  165.11   38.05
   3  -7 -10  236.62   23.46
   2  -7 -10  175.21   19.42
  -2   7  10  168.51   30.61
   2  -7 -10  148.30   36.12
   1  -7 -10   55.89   27.32
  -1   7  10   -4.57   31.13
   1  -7 -10   39.52   11.60
   0   7  10   81.02   46.05
   0  -7 -10   13.66   23.37
   1   7  10  339.06   61.40
   2   7  10  162.31   59.04
  -2  -7 -10   62.60   28.02
   3   7  10  110.39   62.56
   4   7  10  152.74   62.98
   5   7  10  392.33   62.17
   6   7  10  -36.06   51.90
   7   7  10  -46.85   42.88
   9  -8 -10    3.90   18.64
   8  -8 -10   12.00   17.66
  -7   8  10  128.02   30.78
   7  -8 -10  148.19   29.73
   6  -8 -10   82.66   22.03
  -6   8  10   63.13   25.57
  -5   8  10  315.48   38.09
   5  -8 -10  362.22   35.68
  -4   8  10    3.72   20.11
   4  -8 -10   -3.42    9.51
   4  -8 -10    7.71   18.08
  -3   8  10  182.53   31.16
   3  -8 -10  145.46   33.93
   3  -8 -10  198.47   21.16
  -2   8  10  223.08   46.37
   2  -8 -10  124.88   34.39
   2  -8 -10  134.97   18.06
   1  -8 -10  500.52   67.00
   1  -8 -10  627.65   48.59
  -1   8  10  659.84   68.72
   0  -8 -10    0.92   20.62
   0   8  10   76.34   51.75
   1   8  10  552.37   77.28
   2   8  10   36.51   48.00
  -2  -8 -10   12.09   24.95
   4   8  10  110.09   57.19
   5   8  10  313.91   76.30
   6   8  10  -83.66   48.63
   8   8  10  -82.81   41.37
   9  -9 -10   61.43   25.78
   8  -9 -10    8.21   17.25
   7  -9 -10   25.64   15.22
   6  -9 -10  216.40   28.45
  -6   9  10  185.91   29.19
  -5   9  10   -8.87   20.19
   4  -9 -10  403.39   35.62
  -4   9  10  388.15   43.88
   4  -9 -10  291.49   47.86
   3  -9 -10   -2.86   14.62
   3  -9 -10   -3.53    8.56
  -3   9  10  -17.88   23.50
   2  -9 -10  283.04   27.83
   2  -9 -10  234.74   41.74
  -2   9  10  351.38   49.62
   1  -9 -10   15.23    9.16
   1  -9 -10   -6.83   16.71
  -1   9  10   19.33   42.12
   0   9  10  591.97   74.36
   1   9  10    7.74   51.47
  -1  -9 -10   -6.76   17.38
   2   9  10  228.51   73.48
  -2  -9 -10  104.97   32.77
   3   9  10   86.26   55.97
  -3  -9 -10   23.55   24.24
   4   9  10  497.12   91.80
   5   9  10  -52.31   46.89
   6   9  10  -73.75   47.79
   9   9  10 -114.08   56.91
   9 -10 -10    8.91   16.24
   8 -10 -10  106.60   29.37
   7 -10 -10    9.42   15.18
   6 -10 -10   95.80   22.43
  -5  10  10   43.73   26.74
   5 -10 -10   19.91   14.29
  -4  10  10   39.18   30.36
   4 -10 -10   37.64   12.99
   3 -10 -10   40.21   14.20
   3 -10 -10   20.52   22.03
  -3  10  10   44.43   37.95
   2 -10 -10   12.46    9.02
   2 -10 -10   -3.27   17.14
  -2  10  10   37.00   39.94
   1 -10 -10    0.78   17.89
  -1  10  10    1.90   44.38
   0 -10 -10   -8.52   16.86
   0  10  10    0.20   45.76
   1  10  10  361.05   84.56
  -2 -10 -10   18.33   23.39
   2  10  10   30.00   55.46
  -3 -10 -10    2.10   22.21
   3  10  10    7.19   52.44
  -4 -10 -10   17.28   24.58
   4  10  10   13.49   57.06
   5  10  10  -51.61   49.81
   6  10  10  -20.25   53.26
   8  10  10  -79.20   46.82
   9  10  10  -93.51   47.35
   9 -11 -10  -14.57   16.66
   8 -11 -10   73.20   25.17
   7 -11 -10   25.81   17.11
   6 -11 -10   20.55   14.53
   5 -11 -10   27.58   15.35
  -4  11  10  456.51   54.57
   4 -11 -10  405.44   39.41
  -3  11  10   30.73   39.02
   3 -11 -10   -0.66    9.37
   3 -11 -10    6.06   18.73
   2 -11 -10  291.41   30.11
   2 -11 -10  256.98   44.52
  -2  11  10  464.57   64.49
  -1  11  10   77.38   56.37
   1 -11 -10   10.63   19.84
   0  11  10  588.93   83.61
   1  11  10    9.40   59.23
  -1 -11 -10   10.47   20.29
   2  11  10  967.04  109.92
   3  11  10  -22.82   51.58
  -3 -11 -10  -18.03   20.36
  -4 -11 -10   25.49   25.13
   4  11  10   87.30   74.95
  -5 -11 -10   16.75   24.42
   5  11  10 -109.35   57.96
   6  11  10   33.61   59.30
   8 -12 -10   -7.91   13.03
   7 -12 -10   30.89   19.16
   6 -12 -10    9.87   13.20
   5 -12 -10  123.38   20.09
   4 -12 -10   43.51   15.24
   3 -12 -10  438.80   45.73
  -3  12  10  682.55   77.78
   2 -12 -10   10.72   18.97
  -2  12  10   22.42   56.39
  -1  12  10  395.95   87.13
   0 -12 -10    6.67   18.99
   0  12  10   20.64   59.70
   1  12  10  636.95   89.45
   2  12  10   99.52   62.31
  -2 -12 -10   42.91   24.82
   3  12  10  156.89   72.01
  -3 -12 -10   87.94   31.89
   4  12  10  -24.34   55.32
  -4 -12 -10    3.84   21.33
   5  12  10  -74.65   52.60
  -5 -12 -10   18.26   24.22
   6  12  10  -78.92   48.94
   8  12  10 -106.92   64.16
   8 -13 -10    2.95   18.77
   7 -13 -10   38.56   18.60
   6 -13 -10    0.45   14.70
   5 -13 -10  212.91   26.37
   4 -13 -10   12.66   10.87
   3 -13 -10   25.01   21.75
   2 -13 -10   36.71   22.40
  -2  13  10  -10.20   52.26
  -1  13  10  -52.24   47.50
   1 -13 -10    1.73   18.86
   0 -13 -10  -10.42   18.24
   0  13  10  -33.34   53.31
  -1 -13 -10  -15.97   17.79
   1  13  10  -43.36   53.21
  -2 -13 -10    7.99   18.17
   2  13  10  -18.89   62.34
  -3 -13 -10   73.23   31.38
   3  13  10  142.17   80.52
  -4 -13 -10   29.75   24.93
   4  13  10  -42.42   54.82
  -5 -13 -10   -5.56   24.10
   6  13  10  -89.96   65.01
   7  13  10 -107.31   65.90
   7 -14 -10   22.46   17.25
   6 -14 -10   -6.05   14.32
   5 -14 -10  109.36   22.29
   3 -14 -10  133.39   33.17
   2 -14 -10    7.08   16.50
   1 -14 -10  128.77   32.77
   0 -14 -10  -10.76   14.65
   0  14  10  -26.84   51.15
  -1 -14 -10   82.39   30.04
   1  14  10  172.51   72.39
  -2 -14 -10   50.88   24.75
   2  14  10   95.91   64.24
  -3 -14 -10   53.32   28.47
   3  14  10   97.82   77.12
   4  14  10  -42.88   56.76
  -4 -14 -10    1.15   20.88
  -5 -14 -10   30.05   29.32
   5  14  10   44.86   69.40
   6  14  10  -73.32   66.94
  -6 -14 -10    4.24   28.07
   7  14  10 -129.59   70.66
   7 -15 -10   18.33   17.78
   6 -15 -10   21.25   18.56
   3 -15 -10   -6.06   17.04
   2 -15 -10  201.38   37.20
   1 -15 -10    4.77   16.54
   0 -15 -10  131.53   31.83
  -1 -15 -10  -14.82   15.41
   1  15  10  -16.84   55.55
   2  15  10  295.77   92.90
   3  15  10   21.73   68.49
  -3 -15 -10    3.40   20.25
  -4 -15 -10   34.00   26.70
   4  15  10   66.45   77.49
  -5 -15 -10   10.04   27.07
   5  15  10  -88.71   67.54
   6  15  10    3.55   78.00
  -6 -15 -10   17.68   29.53
   3 -16 -10   66.27   25.99
   2 -16 -10   21.69   19.82
   1 -16 -10   16.92   21.02
   0 -16 -10    8.60   18.57
  -1 -16 -10   59.08   27.06
  -2 -16 -10   -6.99   19.41
   2  16  10  -17.58   60.87
  -3 -16 -10   18.95   22.09
   3  16  10   -3.97   62.64
   4  16  10   -3.01   70.35
  -4 -16 -10    7.88   23.36
   5  16  10  -24.17   72.82
  -5 -16 -10   -1.56   27.53
  -6 -16 -10   19.36   30.20
   6  16  10  -70.85   70.72
   3 -17 -10    6.97   20.63
   2 -17 -10   45.77   23.72
   1 -17 -10   -1.38   19.42
   0 -17 -10   50.44   25.95
  -1 -17 -10    6.68   19.57
  -2 -17 -10   -0.13   18.68
   3  17  10   -6.95   71.96
  -3 -17 -10   -6.80   18.54
   4  17  10   91.07   78.35
  -4 -17 -10   51.45   30.17
  -5 -17 -10   26.33   27.01
   5  17  10  -79.07   69.22
   3 -18 -10   29.65   23.07
   2 -18 -10   -7.21   17.43
   1 -18 -10  176.11   36.82
   0 -18 -10    6.85   21.28
  -1 -18 -10   45.75   24.68
  -2 -18 -10    8.21   20.39
  -3 -18 -10  118.98   36.57
  -4 -18 -10   10.81   25.13
   4  18  10  -99.00   55.26
   3 -19 -10    9.28   22.16
   2 -19 -10   52.31   26.81
   1 -19 -10    4.04   21.65
   0 -19 -10   47.77   26.93
  -1 -19 -10  -12.54   16.90
  -2 -19 -10   20.40   23.05
  -3 -19 -10    7.38   24.08
   1 -20 -10   11.59   21.24
   0 -20 -10    8.92   20.71
  -3 -19  11   -4.37   16.96
  -2 -19  11   83.63   28.53
  -1 -19  11   -7.28   21.41
   0 -19  11   96.84   35.17
  -4 -18  11   -6.21   13.46
  -3 -18  11    5.40   15.91
  -2 -18  11   -6.86   20.38
  -1 -18  11    1.63   22.81
   2 -18  11  -17.82   31.78
   3 -18  11  -13.48   46.06
   4 -18  11  -10.79   50.55
  -4 -17  11   57.47   19.63
  -3 -17  11    6.60   16.21
  -2 -17  11   78.78   26.60
   1 -17  11   30.11   37.77
   2 -17  11   -5.64   38.94
   3 -17  11  -54.65   39.47
   4 -17  11  -10.99   53.12
   5 -17  11  -23.46   52.55
  -4 -16  11    4.82   12.69
  -3 -16  11   70.49   23.02
   0 -16  11   -7.93   35.07
   1 -16  11    0.08   43.38
   2 -16  11   16.70   43.56
   3 -16  11   61.45   60.23
   4 -16  11   -0.50   58.00
   5 -16  11  -49.85   42.95
   6 -16  11  -58.78   46.42
  -4 -15  11    5.45   12.68
  -3 -15  11   -5.82   10.74
  -1 -15  11    3.71   27.02
   0 -15  11  -10.85   35.15
   1 -15  11  -35.58   44.85
   2 -15  11  -47.07   49.04
   3 -15  11   74.71   63.58
   4 -15  11  -39.52   49.84
   5 -15  11  -31.88   51.62
   7  14 -11   89.55   29.07
  -4 -14  11   -6.13    9.86
  -1 -14  11   -0.10   32.75
   0 -14  11   27.51   46.16
   1 -14  11  137.74   68.90
   2 -14  11    9.72   49.36
   3 -14  11  -44.78   48.97
   4 -14  11  -13.85   47.04
   5 -14  11  -81.94   41.05
   6 -14  11  -40.37   39.08
   7 -14  11  -43.39   34.64
   8  13 -11  132.51   35.47
   7  13 -11   -8.13   20.04
   6  13 -11   30.79   22.10
   5  13 -11  -14.94   13.90
  -4 -13  11  174.14   24.48
  -2 -13  11  142.89   45.26
  -1 -13  11   -5.72   33.20
   0 -13  11  170.80   71.82
   1 -13  11   -2.82   54.10
   2 -13  11  252.01   92.16
   3 -13  11  -33.57   48.56
   4 -13  11  -43.09   45.34
   5 -13  11  -62.49   37.05
   6 -13  11   -4.14   42.49
   7 -13  11  -68.62   34.88
   8  12 -11  -16.80   20.95
   7  12 -11   43.32   24.87
   6  12 -11  -18.75   15.20
   5  12 -11   24.68   17.34
   4  12 -11    1.19   12.10
  -3 -12  11  152.64   37.94
  -2 -12  11  143.07   46.78
  -1 -12  11  131.10   58.05
   0 -12  11   87.96   63.57
   1 -12  11  388.73  107.99
   2 -12  11  121.94   80.89
   3 -12  11  -22.40   43.65
   4 -12  11   62.07   54.58
   5 -12  11  -43.27   29.70
   6 -12  11  -30.99   36.69
   7 -12  11  -44.77   30.37
   8 -12  11  -47.93   33.73
   9  11 -11   42.66   32.92
   8  11 -11   -4.94   20.99
   7  11 -11   -4.74   17.12
   6  11 -11   95.27   25.45
   5  11 -11   60.65   19.56
   4  11 -11  134.51   22.79
   3  11 -11    5.70   11.88
  -2 -11  11  -13.68   20.01
  -1 -11  11   99.41   54.01
   0 -11  11  -11.86   58.03
   1 -11  11   17.23   54.85
   2 -11  11   83.67   62.02
   3 -11  11  323.55   82.91
   4 -11  11   55.76   48.51
   5 -11  11  -10.46   32.98
   6 -11  11  -26.69   32.36
   7 -11  11  -40.13   29.67
   9  10 -11  101.70   34.53
   8  10 -11  -13.94   21.69
   7  10 -11  172.68   33.46
   6  10 -11    7.89   14.87
   5  10 -11  255.86   27.44
   4  10 -11   -5.47   11.16
   3  10 -11  325.99   29.18
  -1 -10  11  458.58   73.00
   0 -10  11   -0.65   44.87
   1 -10  11  756.91  117.05
   2 -10  11  246.66   79.88
   3 -10  11  276.13   74.23
   4 -10  11   -8.89   29.29
   5 -10  11   41.89   39.01
   6 -10  11  -51.77   26.96
   7 -10  11  -28.02   30.34
   8 -10  11  -42.52   25.61
   9   9 -11  -16.02   26.23
   8   9 -11  102.37   29.36
   7   9 -11   17.86   18.69
   6   9 -11   58.35   20.71
   5   9 -11   40.59   15.69
   4   9 -11  114.22   17.14
   3   9 -11   58.85   14.70
  -2  -9  11  159.61   19.24
  -1  -9  11  169.56   49.03
   0  -9  11  392.94   88.49
   1  -9  11  601.41   97.22
   2  -9  11  473.38   82.20
   3  -9  11  165.86   57.18
   4  -9  11   14.30   33.93
   5  -9  11  274.23   62.16
   6  -9  11  -22.78   27.51
   7  -9  11    2.32   36.57
   9  -9  11  -28.53   30.97
   9   8 -11  -17.02   20.45
   8   8 -11   43.20   26.79
   7   8 -11   10.73   17.71
   6   8 -11   49.70   17.60
   5   8 -11  180.75   22.53
   4   8 -11    9.17   11.66
   3   8 -11    3.42    9.33
  -1  -8  11   95.07   16.74
   0  -8  11  317.59   59.03
   1  -8  11   30.50   43.77
   2  -8  11  367.78   80.62
   3  -8  11   -0.05   30.30
   4  -8  11  313.61   62.93
   5  -8  11  -18.81   26.60
   6  -8  11   49.20   36.29
   7  -8  11  -24.03   29.51
   8  -8  11    0.12   33.71
  10   7 -11   77.29   32.74
   9   7 -11   -2.29   21.21
   8   7 -11   79.81   28.40
   7   7 -11    9.34   17.37
   6   7 -11  456.30   40.62
   5   7 -11   70.41   17.85
   4   7 -11  274.81   26.55
   3   7 -11   -3.78    8.97
  -2  -7  11  313.21   28.30
  -1  -7  11    6.38   13.21
   0  -7  11 1023.11   79.00
   0  -7  11 1100.10  110.11
   1  -7  11   91.93   44.21
   2  -7  11  242.11   61.98
   3  -7  11  155.10   47.87
   4  -7  11  299.00   51.63
   5  -7  11   38.96   32.57
   6  -7  11  -23.13   25.81
   7  -7  11  -29.01   25.81
   8  -7  11  -33.38   27.71
   9  -7  11  -35.10   30.87
  10   6 -11    7.66   27.56
   9   6 -11   29.16   25.12
   8   6 -11   -0.74   20.65
   7   6 -11  147.52   30.14
   6   6 -11   28.61   17.04
   5   6 -11  645.05   50.85
   4   6 -11    8.76   10.59
  -2  -6  11   29.15   13.43
  -1  -6  11  740.77   56.11
   0  -6  11  245.21   42.07
   1  -6  11   57.69   26.79
   1  -6  11   74.74   36.24
   2  -6  11    2.01   21.05
   2  -6  11    4.68   25.19
   3  -6  11  175.69   41.11
   4  -6  11  126.79   40.83
   5  -6  11  172.67   45.75
   6  -6  11   16.54   35.28
   7  -6  11  -32.11   29.04
   8  -6  11  -37.44   27.26
   9  -6  11  -43.33   28.68
  10   5 -11   13.63   25.31
   9   5 -11   15.21   22.59
   8   5 -11    0.75   20.25
   7   5 -11   72.52   22.46
   6   5 -11  158.81   21.92
   5   5 -11  112.48   18.14
   4   5 -11   14.66   10.60
  -3  -5  11   -1.43    9.71
  -2  -5  11   -7.86   11.13
  -1  -5  11  160.09   21.04
   0  -5  11   51.54   21.12
   1  -5  11  786.54   80.38
   1  -5  11  693.53   64.56
   2  -5  11   37.33   26.28
   2  -5  11   89.36   35.21
   3  -5  11   79.59   29.96
   3  -5  11  225.11   46.75
   4  -5  11   24.23   27.86
   5  -5  11  351.28   52.99
   6  -5  11  -25.57   25.39
   7  -5  11   59.01   43.75
   8  -5  11  -47.66   25.38
   9  -5  11   30.23   46.46
  10   4 -11   54.13   28.48
   9   4 -11  116.78   30.75
   8   4 -11   22.73   20.82
   7   4 -11  161.34   24.68
   6   4 -11  141.60   21.90
   5   4 -11  308.51   29.86
   4   4 -11  144.90   17.59
  -3  -4  11  653.65   49.83
  -2  -4  11  112.65   16.35
  -1  -4  11  243.93   26.70
   0  -4  11  346.98   37.36
   1  -4  11  518.74   55.28
   1  -4  11  620.69   64.02
   2  -4  11   77.11   28.45
   2  -4  11   37.64   29.58
   3  -4  11  204.05   37.39
   3  -4  11  118.70   33.09
   4  -4  11  -30.99   24.00
   4  -4  11    8.48   21.92
   5  -4  11    8.70   25.54
   6  -4  11   55.98   35.70
   8  -4  11  -28.55   26.07
   9  -4  11  -18.93   33.22
  10   3 -11   92.34   33.42
   9   3 -11  116.68   31.36
   8   3 -11  184.18   27.98
   7   3 -11   11.87   16.60
   6   3 -11  662.23   53.58
   5   3 -11   23.45   13.59
  -4  -3  11  408.61   35.66
  -3  -3  11    5.77   10.29
  -2  -3  11  832.84   61.77
  -1  -3  11   -6.00   12.89
   0  -3  11  935.31   74.47
   1  -3  11  197.11   32.45
   1  -3  11  244.80   46.88
   2  -3  11  525.92   60.50
   2  -3  11  702.95   67.27
   3  -3  11   35.19   26.76
   3  -3  11  107.41   31.54
   4  -3  11  117.72   35.34
   4  -3  11   26.19   34.13
   5  -3  11  -18.15   24.25
   5  -3  11  -45.79   24.14
   6  -3  11   -5.83   27.04
   7  -3  11   -4.56   32.10
   9  -3  11  -55.85   29.94
  10   2 -11   85.64   30.68
   9   2 -11   44.06   25.03
   8   2 -11   77.37   25.70
   7   2 -11   38.09   18.76
   6   2 -11   22.57   15.79
  -4  -2  11    7.97   14.38
  -3  -2  11  -21.90   10.21
  -2  -2  11  336.42   30.41
  -1  -2  11  243.71   26.76
   0  -2  11   -8.71   20.31
   1  -2  11  -46.92   29.79
   2  -2  11  733.17   66.76
   2  -2  11  556.61   63.48
   3  -2  11   78.15   27.21
   3  -2  11   20.73   29.72
   4  -2  11  111.61   44.54
   4  -2  11  320.93   42.30
   5  -2  11  -11.11   25.41
   5  -2  11  -47.31   22.12
   6  -2  11  321.77   53.22
   7  -2  11  -26.27   24.99
   8  -2  11   93.50   46.32
  10   1 -11  -18.06   22.84
  10   1 -11  -10.78   22.45
   9   1 -11  179.22   34.41
   9   1 -11  137.87   39.73
   8   1 -11  137.38   31.57
   8   1 -11  138.54   36.88
   7   1 -11   58.51   20.04
   7   1 -11   43.66   24.05
  -5  -1  11   -6.45   13.17
  -4  -1  11  391.50   34.58
  -3  -1  11  -16.99   11.46
  -2  -1  11  171.26   21.32
  -1  -1  11   -5.44   14.15
   1  -1  11  -31.87   26.58
   2  -1  11  531.15   62.64
   2  -1  11  625.87   59.19
   3  -1  11  325.80   46.63
   3  -1  11  457.97   49.79
   4  -1  11  -31.91   29.00
   4  -1  11   14.99   21.48
   5  -1  11  193.07   45.55
   5  -1  11  129.28   44.06
   6  -1  11   88.46   36.56
   6  -1  11  -42.08   36.05
   7  -1  11  144.42   51.81
   7  -1  11  -13.93   36.45
  10   0 -11   -2.11   23.38
   9   0 -11  178.71   41.81
   8   0 -11   13.00   22.31
   7   0 -11  280.19   40.63
  -6   0  11   -7.39   16.00
   6   0 -11   -6.19   15.45
  -5   0  11  564.88   47.00
  -4   0  11   10.89   14.20
  -3   0  11 1255.95   89.17
  -2   0  11    3.85   10.77
  -1   0  11   87.17   20.95
   0   0  11  -19.94   15.88
   1   0  11  919.30   81.54
   2   0  11   13.58   15.32
   2   0  11   23.20   33.75
   3   0  11  238.90   54.64
   3   0  11  274.39   37.36
   4   0  11  -43.15   29.48
   4   0  11   -5.86   20.56
   5   0  11   26.94   26.74
   5   0  11   -5.09   31.61
   6   0  11   26.83   29.89
   6   0  11  -32.32   38.32
   7   0  11  -55.79   40.27
   7   0  11   21.41   32.69
  10  -1 -11    5.39   23.95
 -10   1  11  -44.85   28.80
   9  -1 -11  146.74   39.66
  -9   1  11  159.13   41.39
  -8   1  11  157.87   37.14
   8  -1 -11  106.07   31.73
  -7   1  11   43.05   25.45
   7  -1 -11   13.91   19.67
   6  -1 -11  115.35   27.86
  -6   1  11  139.94   30.74
   5  -1 -11    7.88   12.02
  -5   1  11   28.02   16.51
  -4   1  11  503.54   42.57
  -3   1  11   54.09   17.02
  -2   1  11  152.23   20.07
  -1   1  11   -0.58   14.32
   0   1  11  -11.88   17.41
   1   1  11   25.52   31.35
   2   1  11  534.55   60.24
   2   1  11  506.92   50.62
   3   1  11  515.42   54.18
   3   1  11  499.71   60.59
   4   1  11  -48.43   31.09
   4   1  11   -9.37   19.36
   5   1  11  219.15   56.53
   5   1  11  237.48   48.95
   6   1  11   -9.32   39.99
   6   1  11   55.27   36.74
   7   1  11   66.50   50.71
  10  -2 -11   78.79   32.35
 -10   2  11   64.18   41.23
  -9   2  11   -7.04   28.65
   9  -2 -11   18.45   20.59
   8  -2 -11   59.28   26.29
  -8   2  11   75.71   28.33
   7  -2 -11   54.15   23.80
  -7   2  11   41.44   23.09
   6  -2 -11    2.71   13.48
  -6   2  11   24.93   19.85
  -5   2  11   69.75   19.68
   4  -2 -11    8.93   13.04
  -4   2  11   13.74   16.24
  -3   2  11    8.71   13.94
  -2   2  11  326.09   32.34
  -1   2  11  220.06   28.06
   0   2  11   24.17   24.90
   1   2  11   49.84   33.13
   2   2  11  770.14   76.08
   2   2  11  632.03   61.51
   3   2  11   -1.94   39.84
   3   2  11   70.47   20.53
   4   2  11  263.13   45.23
   4   2  11  361.41   44.88
   5   2  11  -15.27   20.09
   6   2  11  269.66   60.15
   8   2  11    0.26   46.22
  10  -3 -11   82.41   31.59
 -10   3  11   52.68   35.99
   9  -3 -11   92.57   31.83
  -9   3  11  124.30   37.32
   8  -3 -11  192.72   33.30
  -8   3  11  214.61   31.76
   7  -3 -11   18.94   17.38
  -7   3  11   18.18   19.96
  -6   3  11  650.91   55.62
   6  -3 -11  633.42   59.75
  -5   3  11   -2.33   14.87
   5  -3 -11   16.41   13.70
   4  -3 -11  485.07   44.58
  -4   3  11  471.78   41.96
  -3   3  11   37.78   17.67
   3  -3 -11    7.87   11.22
  -2   3  11  895.35   70.23
  -1   3  11  -16.90   15.13
   0   3  11 1061.88   88.97
   1   3  11  298.51   60.10
   2   3  11  838.72   84.83
   3   3  11  109.91   50.97
   3   3  11  101.17   25.66
   4   3  11  158.51   34.18
   4   3  11   45.81   47.12
   5   3  11  -78.82   40.32
   6   3  11   18.70   43.46
   7   3  11  -65.75   34.37
  10  -4 -11    9.02   22.67
 -10   4  11    1.24   32.29
   9  -4 -11  104.47   31.16
  -9   4  11   93.26   35.11
   8  -4 -11   19.06   20.96
  -8   4  11   36.26   26.41
  -7   4  11  189.34   26.71
   7  -4 -11  130.47   26.33
  -6   4  11  136.16   23.50
   6  -4 -11  140.71   24.72
   5  -4 -11  276.55   31.83
  -5   4  11  268.81   31.55
  -4   4  11  146.39   21.71
   4  -4 -11  168.48   22.53
   3  -4 -11  669.30   54.44
  -3   4  11  618.12   53.62
  -2   4  11  162.00   32.33
  -1   4  11  275.10   37.23
   0   4  11  372.05   48.37
   1   4  11  714.82   75.91
   2   4  11   -8.24   42.26
   3   4  11  211.04   30.23
   3   4  11  187.87   57.90
   4   4  11   -6.73   19.63
   4   4  11  -50.70   33.09
   5   4  11  -40.47   43.13
   6   4  11   57.68   52.81
  10  -5 -11    6.72   22.13
 -10   5  11    1.65   27.50
   9  -5 -11    1.53   19.47
  -9   5  11   22.51   26.97
  -8   5  11    9.38   22.67
   8  -5 -11   -2.05   15.07
  -7   5  11   52.21   25.53
   7  -5 -11   44.12   19.70
  -6   5  11  163.20   27.02
   6  -5 -11  149.30   25.16
  -5   5  11  163.61   30.63
   5  -5 -11  107.37   21.05
   4  -5 -11   16.60   11.05
  -4   5  11   27.43   18.25
  -3   5  11   -6.91   15.51
   3  -5 -11   -2.58    7.89
  -2   5  11  -15.36   18.35
  -1   5  11  252.72   47.52
   0   5  11  -22.63   36.55
   1   5  11  729.70   80.14
   2   5  11   45.14   46.64
   3   5  11  278.71   70.92
   3   5  11  253.83   35.39
   4   5  11   18.70   54.32
   5   5  11  470.20   70.11
   7   5  11  -19.84   49.21
  10  -6 -11   13.98   23.66
   9  -6 -11   48.27   24.41
  -9   6  11   52.81   28.94
  -8   6  11    9.93   21.02
   8  -6 -11    1.44   16.21
   7  -6 -11  131.61   25.14
  -7   6  11  156.15   32.17
  -6   6  11   13.08   19.84
   6  -6 -11   18.95   14.50
   5  -6 -11  648.32   57.62
  -5   6  11  666.74   57.43
  -4   6  11   34.04   20.15
   4  -6 -11   11.12   10.63
   3  -6 -11   25.86   11.59
  -3   6  11   27.84   21.17
  -2   6  11   28.98   24.06
   2  -6 -11   16.01    9.84
  -1   6  11  739.66   71.43
   0   6  11  273.11   60.55
   1   6  11  116.91   57.47
   2   6  11  -15.10   45.35
   3   6  11  232.14   68.20
   4   6  11  192.20   74.68
   5   6  11  289.50   72.79
   6   6  11   32.79   50.06
   8   6  11  -89.38   41.53
   9  -7 -11    2.63   16.87
   8  -7 -11   58.99   24.21
  -8   7  11   55.52   27.88
   7  -7 -11    3.78   14.60
  -7   7  11   23.89   22.29
   6  -7 -11  449.43   46.91
  -6   7  11  517.05   48.08
   5  -7 -11   34.44   14.97
  -5   7  11   32.83   23.72
  -4   7  11  252.28   32.41
   4  -7 -11  289.49   29.50
   3  -7 -11  -10.13    6.53
  -3   7  11   -6.08   18.21
   2  -7 -11  289.95   28.55
  -2   7  11  301.90   40.42
   1  -7 -11  -11.90   19.93
  -1   7  11    3.08   29.31
   1   7  11  144.60   61.11
   2   7  11  612.44   80.43
   3   7  11  133.73   60.19
   4   7  11  449.13   70.10
   5   7  11   69.79   59.92
   6   7  11  -26.18   51.15
   7   7  11  -13.51   48.61
   9  -8 -11   -0.01   17.15
   8  -8 -11   67.86   24.48
   7  -8 -11   -1.65   13.23
  -7   8  11   27.69   22.46
   6  -8 -11   42.75   18.15
  -6   8  11   49.91   25.10
  -5   8  11  199.73   37.82
   5  -8 -11  159.61   24.01
  -4   8  11   -3.81   22.36
   4  -8 -11   -0.62   10.54
  -3   8  11    5.09   20.18
   3  -8 -11   -9.91   17.14
   3  -8 -11    7.22    9.51
   2  -8 -11   11.03    9.04
  -2   8  11   25.30   29.52
   2  -8 -11   -7.75   18.89
  -1   8  11   62.63   38.01
   1  -8 -11   31.06   25.58
   0   8  11  337.87   59.11
   1   8  11   43.38   47.06
  -1  -8 -11   10.97   24.02
   2   8  11  356.23   86.48
   3   8  11  105.05   67.55
   4   8  11  461.51   93.13
   5   8  11  -30.78   54.57
   6   8  11   63.51   72.80
   9  -9 -11  -14.34   15.84
   8  -9 -11  106.24   27.93
   7  -9 -11   25.29   17.90
  -6   9  11   65.12   27.33
   6  -9 -11   48.82   18.35
  -5   9  11   18.19   24.99
   5  -9 -11   40.53   16.30
  -4   9  11  190.02   40.90
   4  -9 -11  101.86   19.09
  -3   9  11   43.73   32.82
   3  -9 -11   36.73   12.71
   3  -9 -11    1.91   21.53
  -2   9  11  233.89   52.71
   2  -9 -11  154.81   19.51
   2  -9 -11  101.38   31.69
  -1   9  11  223.38   60.79
   1  -9 -11   91.71   33.21
   0   9  11  289.13   69.35
   1   9  11  438.86   70.52
   2   9  11  482.21   75.75
   3   9  11  168.53   74.79
  -3  -9 -11   75.23   31.34
   4   9  11  115.61   73.66
   5   9  11  411.31   94.12
   6   9  11  -18.79   50.60
   7   9  11  -76.20   42.51
   9 -10 -11   69.25   27.55
   8 -10 -11   -8.39   16.47
   7 -10 -11  131.07   24.04
   6 -10 -11   15.43   14.48
   5 -10 -11  259.33   28.64
  -5  10  11  201.76   34.69
   4 -10 -11   -8.78   10.41
  -4  10  11  -20.65   26.45
  -3  10  11  400.04   52.85
   3 -10 -11  346.81   32.46
   3 -10 -11  262.43   47.34
   2 -10 -11   22.16   10.52
  -2  10  11   58.94   44.43
   2 -10 -11    7.53   21.54
  -1  10  11  514.21   73.20
   0  10  11    2.53   48.26
   0 -10 -11  -10.58   18.88
   1  10  11  554.30   80.43
   2  10  11  205.64   76.80
   3  10  11  482.44  107.54
   4  10  11  -24.44   63.61
   5  10  11   70.94   76.23
   8  10  11 -121.64   55.97
   8 -11 -11    9.21   17.88
   7 -11 -11   -7.82   14.67
   6 -11 -11   64.82   20.83
   5 -11 -11   55.85   17.29
   4 -11 -11   96.54   19.80
  -4  11  11  115.14   41.75
  -3  11  11   20.83   39.72
   3 -11 -11    1.76    9.92
   3 -11 -11    8.05   21.50
   2 -11 -11   29.21   22.08
  -2  11  11   -8.90   40.58
  -1  11  11   66.91   58.24
   1 -11 -11   60.20   26.31
   0  11  11  -19.18   56.16
   0 -11 -11    4.73   21.14
  -1 -11 -11   -4.88   21.80
   1  11  11  -69.57   58.27
  -2 -11 -11   44.98   27.17
   2  11  11  134.08   81.97
   3  11  11  491.61   86.34
   4  11  11  123.35   84.90
  -4 -11 -11   51.57   29.26
   5  11  11  -36.63   68.76
   6  11  11  -78.89   64.22
   7  11  11 -102.63   57.84
   8 -12 -11    1.96   17.89
   7 -12 -11   55.65   20.17
   6 -12 -11  -10.71   10.80
   5 -12 -11   10.83   13.22
   4 -12 -11    0.13   11.26
  -3  12  11  363.15   73.89
  -2  12  11  311.95   76.93
  -1  12  11  188.69   70.07
   1 -12 -11   68.90   29.26
   0  12  11  -41.36   63.82
   0 -12 -11    1.69   22.57
   1  12  11  311.13   94.17
   2  12  11  151.86   73.64
  -2 -12 -11   47.40   26.11
  -3 -12 -11   47.32   26.04
   3  12  11    2.73   72.21
   4  12  11  237.16   94.99
   5  12  11  -74.40   63.51
   6  12  11  -66.97   72.13
   7  12  11 -121.35   67.08
   8  12  11  -85.37   65.57
   8 -13 -11  108.29   27.79
   7 -13 -11   -0.92   13.86
   6 -13 -11   42.00   17.76
   5 -13 -11   12.63   13.28
   4 -13 -11  234.30   26.48
   3 -13 -11   16.50   22.07
  -2  13  11  342.91   82.17
  -1  13  11  -15.34   57.02
   1 -13 -11    6.35   18.36
   0  13  11  249.94   83.43
   1  13  11  -76.72   60.41
  -1 -13 -11   -0.73   17.96
   2  13  11  446.00  109.15
  -3 -13 -11   17.71   25.53
   3  13  11   45.22   77.89
   4  13  11    5.11   69.68
  -4 -13 -11   10.65   24.54
  -5 -13 -11  -25.29   19.52
   5  13  11  -50.23   75.37
   6  13  11  -56.37   64.00
   7  13  11 -134.36   62.00
   7 -14 -11   77.79   22.78
   6 -14 -11    1.84   12.92
   5 -14 -11   21.56   15.34
   3 -14 -11  174.59   36.76
   2 -14 -11   10.45   21.86
  -1  14  11   41.73   61.48
   1 -14 -11    3.90   17.65
   0 -14 -11   29.10   21.86
   0  14  11   45.59   68.83
   1  14  11  329.91   94.23
   2  14  11   73.01   77.40
  -2 -14 -11   18.20   22.47
  -3 -14 -11   37.86   27.18
   3  14  11   40.23   82.26
  -4 -14 -11   28.32   28.02
   4  14  11   -3.55   65.38
   5  14  11  -57.23   62.80
  -5 -14 -11   -6.23   23.09
   6  14  11  -28.95   65.38
   7  14  11 -141.04   66.87
   7 -15 -11    3.61   14.50
   3 -15 -11   -5.34   16.94
   2 -15 -11   23.54   21.14
   1 -15 -11    0.49   20.95
   0 -15 -11   18.04   22.05
   0  15  11   -5.11   65.06
  -1 -15 -11   16.26   20.78
   1  15  11   10.34   69.84
  -2 -15 -11   28.70   23.25
   2  15  11   51.85   77.12
   3  15  11  154.50   78.69
  -3 -15 -11   38.85   29.67
   4  15  11   70.55   76.02
  -4 -15 -11   22.87   28.46
   5  15  11   32.42   74.30
  -5 -15 -11    8.94   24.71
   6  15  11 -147.77   73.74
   3 -16 -11   39.04   26.42
   2 -16 -11   14.17   22.35
   1 -16 -11  142.26   32.08
   0 -16 -11    6.85   20.06
   1  16  11  103.07   77.45
  -1 -16 -11   25.17   25.26
   2  16  11   47.09   81.72
  -2 -16 -11   42.44   26.69
   3  16  11  106.23   84.42
  -3 -16 -11   56.07   28.88
   4  16  11   48.55   74.45
  -4 -16 -11   28.44   26.38
  -5 -16 -11   17.70   26.64
   5  16  11  -37.40   78.12
  -6 -16 -11   11.95   29.82
   6  16  11  -26.05   69.97
   3 -17 -11    2.06   20.64
   2 -17 -11   93.08   31.79
   1 -17 -11   -1.36   20.73
   0 -17 -11   49.77   26.69
  -1 -17 -11   31.43   23.62
  -2 -17 -11   42.66   25.13
  -3 -17 -11   -0.73   23.03
   3  17  11    5.93   78.12
  -4 -17 -11    2.54   26.26
   4  17  11   36.33   81.16
  -5 -17 -11   21.84   29.60
   5  17  11    7.86   81.53
   3 -18 -11    1.94   21.44
   2 -18 -11    9.53   20.44
   1 -18 -11    2.23   20.69
   0 -18 -11   39.78   26.95
  -1 -18 -11   -3.49   19.01
  -2 -18 -11   22.03   24.02
  -3 -18 -11   -4.97   20.62
   4  18  11   30.09   81.13
  -4 -18 -11   36.40   28.15
   3 -19 -11    6.07   24.06
   2 -19 -11   78.86   31.93
   1 -19 -11    5.26   22.47
   0 -19 -11   80.11   31.87
  -1 -19 -11   32.57   25.33
  -2 -19 -11    5.37   20.93
  -2 -19  12   -5.03   23.14
  -1 -19  12   28.79   29.13
  -3 -18  12   30.40   22.33
  -2 -18  12   -3.46   18.59
   2 -18  12  -25.96   40.73
   3 -18  12  -45.12   50.42
  -3 -17  12   14.16   17.39
   1 -17  12   17.45   45.34
   2 -17  12   -3.73   49.56
   3 -17  12   26.73   60.36
   4 -17  12  -26.03   58.65
  -4 -16  12   38.34   16.65
  -3 -16  12   46.36   21.06
   0 -16  12   69.37   45.74
   1 -16  12  -12.00   44.48
   2 -16  12    2.09   55.96
   3 -16  12  -72.39   53.50
   4 -16  12    4.41   59.60
   5 -16  12  -41.88   61.51
  -4 -15  12   65.07   19.39
  -1 -15  12  -17.71   28.60
   0 -15  12   -1.31   40.17
   1 -15  12   -0.01   55.17
   2 -15  12  -10.01   58.10
   3 -15  12  -42.83   65.39
   4 -15  12  -91.42   55.46
   5 -15  12  -62.05   58.53
   6 -15  12 -105.24   57.02
   7  14 -12   44.01   26.48
  -4 -14  12   -0.12   11.72
  -2 -14  12  151.76   43.05
  -1 -14  12   27.44   40.76
   0 -14  12   36.02   53.21
   1 -14  12   -8.70   52.99
   2 -14  12  129.28   82.60
   3 -14  12  -21.12   57.90
   4 -14  12   74.48   64.76
   5 -14  12  -73.17   47.00
   6 -14  12  -15.62   52.41
   7  13 -12   -3.89   17.77
   6  13 -12  -19.09   15.87
  -2 -13  12   12.58   29.83
  -1 -13  12  224.45   65.54
   0 -13  12  -37.65   43.69
   1 -13  12    1.79   58.11
   2 -13  12   14.07   67.90
   3 -13  12  386.76  107.16
   4 -13  12  -21.36   49.15
   5 -13  12   63.06   53.00
   6 -13  12  -62.52   37.01
   7 -13  12   19.75   48.51
   8  12 -12  -10.84   20.65
   7  12 -12  156.68   31.33
   6  12 -12   14.90   18.58
   5  12 -12   31.94   17.58
   4  12 -12  -18.13   12.32
  -3 -12  12  141.91   36.72
  -2 -12  12   80.84   38.66
  -1 -12  12   37.99   44.90
   0 -12  12    2.46   51.19
   1 -12  12  175.51   90.10
   2 -12  12  240.43   96.04
   3 -12  12   58.09   62.76
   4 -12  12   75.32   59.19
   5 -12  12  -38.20   39.50
   6 -12  12  -24.86   38.65
   7 -12  12  -36.11   38.84
   8  11 -12  142.91   26.00
   7  11 -12    4.10   18.46
   6  11 -12   37.58   17.94
   5  11 -12  -10.41   14.05
   4  11 -12  212.21   24.11
   3  11 -12   53.28   16.22
  -2 -11  12  207.81   49.89
  -1 -11  12  146.64   55.07
   0 -11  12  159.56   74.34
   1 -11  12   73.91   72.70
   2 -11  12  384.50  106.56
   3 -11  12   -5.36   46.66
   4 -11  12  -16.19   35.29
   5 -11  12   60.79   48.39
   6 -11  12  -37.78   30.62
   7 -11  12  -38.26   30.85
   8 -11  12  -16.96   38.79
   9  10 -12  -14.70   24.74
   8  10 -12   -9.60   20.59
   7  10 -12   75.62   25.38
   6  10 -12   -3.11   14.39
   5  10 -12   10.60   13.05
   4  10 -12   66.42   18.16
   3  10 -12   85.38   17.30
  -1 -10  12   10.76   30.06
   0 -10  12  594.42   93.91
   1 -10  12   81.40   67.18
   2 -10  12  513.20  110.11
   3 -10  12   -3.16   41.16
   4 -10  12  364.07   82.94
   5 -10  12    5.36   35.85
   6 -10  12  106.26   47.97
   7 -10  12  -26.16   35.39
   8 -10  12   26.51   41.81
   9   9 -12   12.71   27.32
   8   9 -12   50.99   23.72
   7   9 -12   12.08   17.31
   6   9 -12  191.33   24.14
   5   9 -12   21.02   15.15
   4   9 -12  310.53   29.47
  -3  -9  12   56.77   22.78
  -2  -9  12  202.35   23.87
  -1  -9  12  205.02   53.12
   0  -9  12  356.14   68.87
   1  -9  12  196.65   67.46
   2  -9  12   -1.83   47.34
   3  -9  12  540.43   82.82
   4  -9  12   11.81   34.66
   5  -9  12   -5.13   33.45
   6  -9  12  -12.10   29.26
   7  -9  12    4.04   36.23
   8  -9  12  -41.58   27.99
   9   8 -12   71.79   30.03
   8   8 -12   -4.42   21.48
   7   8 -12  112.09   20.54
   6   8 -12   42.71   18.62
   5   8 -12  307.08   30.82
   4   8 -12   47.11   15.44
  -3  -8  12  206.05   24.57
  -2  -8  12   29.53   15.88
  -1  -8  12  317.09   30.70
   0  -8  12  116.91   45.80
   1  -8  12  216.60   63.54
   2  -8  12   -9.77   33.94
   3  -8  12    2.19   27.91
   4  -8  12    5.64   33.07
   5  -8  12    6.89   32.01
   6  -8  12   17.19   34.15
   7  -8  12   -6.72   31.67
   8  -8  12  -36.90   31.73
   9  -8  12  -46.61   33.26
   9   7 -12   27.06   27.10
   8   7 -12   44.30   24.85
   7   7 -12   -9.95   15.90
   6   7 -12   96.75   23.38
   5   7 -12  106.83   18.67
   4   7 -12   33.63   14.54
  -3  -7  12  112.17   22.04
  -2  -7  12  104.27   19.93
  -1  -7  12  177.82   22.07
   0  -7  12   29.99   22.72
   0  -7  12   91.58   34.70
   1  -7  12 1908.42  173.13
   2  -7  12   59.89   38.44
   3  -7  12  279.46   54.76
   4  -7  12   -6.68   25.45
   5  -7  12  560.75   73.31
   6  -7  12   -5.44   29.27
   7  -7  12   65.72   42.17
   8  -7  12  -29.39   28.44
   9  -7  12   -2.50   39.34
   9   6 -12   69.38   30.46
   8   6 -12  -14.15   19.62
   7   6 -12  -14.77   13.85
   6   6 -12    2.61   13.90
   5   6 -12   96.46   16.88
   4   6 -12  246.79   24.64
  -3  -6  12    6.32   12.01
  -2  -6  12   12.91   12.77
  -1  -6  12  132.91   19.59
   0  -6  12  416.52   41.14
   1  -6  12  117.28   34.66
   1  -6  12  158.73   42.55
   2  -6  12  325.10   56.15
   3  -6  12   -8.10   27.99
   4  -6  12  138.03   42.82
   5  -6  12   -0.13   27.50
   6  -6  12  179.49   49.86
   7  -6  12  -35.26   23.09
   8  -6  12  -18.21   31.22
  10   5 -12  158.28   39.90
   9   5 -12    4.07   23.49
   8   5 -12  142.93   32.80
   7   5 -12  -15.82   13.55
   6   5 -12  412.57   37.91
   5   5 -12   87.91   20.28
  -4  -5  12  129.34   19.31
  -3  -5  12  168.68   19.77
  -2  -5  12  188.99   21.60
  -1  -5  12   14.73   13.46
   0  -5  12  913.10   72.33
   1  -5  12  127.68   35.14
   1  -5  12  132.12   35.74
   2  -5  12  152.47   36.86
   2  -5  12   87.75   37.07
   3  -5  12   12.41   25.66
   4  -5  12   51.78   33.47
   5  -5  12  -11.74   26.76
   6  -5  12  -13.34   25.36
   7  -5  12  -17.00   30.79
   8  -5  12  -33.69   31.99
   9  -5  12  -39.01   33.29
  10   4 -12   30.44   27.46
   9   4 -12   79.57   28.29
   8   4 -12    2.05   17.86
   7   4 -12   48.24   21.64
   6   4 -12  117.70   23.49
   5   4 -12  376.65   34.38
  -4  -4  12   19.52   14.59
  -3  -4  12   63.17   17.68
  -2  -4  12  303.23   28.82
  -1  -4  12  407.75   37.40
   0  -4  12  701.69   59.69
   1  -4  12   36.25   19.34
   2  -4  12  607.74   63.54
   2  -4  12  426.67   52.74
   3  -4  12   44.15   27.75
   3  -4  12   39.41   29.28
   4  -4  12  273.52   41.96
   4  -4  12  471.85   57.08
   5  -4  12   18.01   28.98
   6  -4  12  210.23   52.74
   7  -4  12  -14.31   27.08
   8  -4  12   -4.83   32.97
   9  -4  12  -39.21   36.96
  10   3 -12    7.64   22.80
   9   3 -12   13.62   22.53
   8   3 -12   82.10   26.51
   7   3 -12   19.33   17.09
   6   3 -12   70.53   21.01
  -5  -3  12   61.40   19.79
  -4  -3  12   71.21   18.58
  -3  -3  12   88.04   15.52
  -2  -3  12   94.26   16.51
  -1  -3  12  528.71   45.59
   0  -3  12  129.39   33.60
   1  -3  12  749.74   67.36
   1  -3  12  612.30   64.81
   2  -3  12  239.64   39.65
   2  -3  12  362.84   46.71
   3  -3  12  873.63   86.28
   4  -3  12  141.47   37.25
   4  -3  12   61.86   34.06
   5  -3  12  220.43   41.81
   5  -3  12  339.02   51.85
   6  -3  12  -27.23   24.06
   7  -3  12  103.54   45.35
   8  -3  12   -8.96   36.49
  10   2 -12    6.08   26.60
   9   2 -12  161.47   27.61
   8   2 -12    7.61   16.87
   7   2 -12  362.06   36.64
  -5  -2  12  341.32   33.27
  -4  -2  12   36.81   15.56
  -3  -2  12  755.10   57.38
  -2  -2  12  -19.51   12.77
  -1  -2  12  103.26   23.73
   0  -2  12   85.32   29.27
   1  -2  12  450.47   51.79
   2  -2  12  262.43   44.10
   2  -2  12  158.11   34.71
   3  -2  12   54.60   24.98
   3  -2  12   -1.67   25.94
   4  -2  12  -11.35   29.75
   4  -2  12   -9.22   17.87
   5  -2  12  -57.52   30.78
   5  -2  12   -5.32   25.31
   6  -2  12   17.05   33.46
   7  -2  12  -12.47   35.15
   8  -2  12  -50.22   31.66
  -7  -1  12    7.10   24.85
  -6  -1  12  174.29   26.63
  -5  -1  12   20.10   15.78
  -4  -1  12  213.34   25.03
  -3  -1  12   45.24   16.00
  -2  -1  12  228.64   26.24
  -1  -1  12  204.36   26.53
   0  -1  12  -16.43   21.41
   1  -1  12    8.43   28.01
   2  -1  12  104.86   48.68
   2  -1  12  175.81   28.38
   3  -1  12  421.07   48.16
   3  -1  12  315.38   48.63
   4  -1  12   22.07   21.80
   4  -1  12   12.85   34.26
   5  -1  12  111.24   45.77
   5  -1  12   66.37   37.24
   6  -1  12   -3.82   26.96
   6  -1  12  -25.18   25.91
   7  -1  12   25.64   40.98
 -10   0  12  -51.55   36.76
  10   0 -12   18.95   23.52
   9   0 -12  -11.09   20.51
  -9   0  12  -13.33   33.33
  -8   0  12   10.31   27.13
   8   0 -12   23.61   24.53
   7   0 -12   13.78   18.96
  -7   0  12  -15.45   20.64
  -6   0  12  183.28   25.74
  -5   0  12   -2.62   12.82
  -4   0  12   79.10   19.64
  -3   0  12  -25.30   11.67
  -2   0  12  797.22   61.94
   0   0  12  553.28   53.25
   1   0  12  -28.34   24.02
   2   0  12  711.19   73.03
   2   0  12  576.71   60.12
   3   0  12  -31.61   27.72
   3   0  12    2.86   17.07
   4   0  12  628.24   70.74
   4   0  12  766.62   73.71
   5   0  12  -24.23   24.40
   5   0  12   -6.70   35.03
   6   0  12  392.27   57.70
   6   0  12  650.04   72.83
   7   0  12  -59.26   41.18
 -10   1  12   -2.14   39.09
  10  -1 -12   64.61   32.93
   9  -1 -12   40.70   27.09
  -9   1  12   25.44   35.23
   8  -1 -12  139.07   36.03
  -8   1  12  173.60   38.11
   7  -1 -12   38.09   22.26
  -7   1  12   41.03   26.27
  -6   1  12  162.47   26.11
   6  -1 -12  161.35   27.65
  -5   1  12   11.52   16.91
  -4   1  12  241.47   26.60
  -3   1  12  -17.89   13.43
  -2   1  12  276.35   30.13
  -1   1  12  213.78   27.73
   0   1  12  -34.49   18.89
   1   1  12  -67.03   32.68
   2   1  12  218.77   55.25
   2   1  12  147.25   25.80
   3   1  12  407.93   46.34
   3   1  12  364.78   51.94
   4   1  12   27.85   23.65
   4   1  12  -18.59   37.26
   5   1  12   42.16   47.16
   5   1  12   86.63   36.14
   6   1  12   28.64   34.08
   6   1  12    9.39   41.10
   7   1  12  -37.91   44.92
  10  -2 -12  -18.35   17.23
 -10   2  12  -47.30   27.88
   9  -2 -12  184.72   36.60
  -9   2  12  217.24   46.48
   8  -2 -12  -14.88   16.51
  -8   2  12   -5.52   23.60
   7  -2 -12  343.54   43.59
  -7   2  12  347.46   37.90
   6  -2 -12   15.61   16.54
  -6   2  12   28.14   20.02
  -5   2  12  351.26   35.98
   5  -2 -12  368.16   38.99
  -4   2  12   28.38   16.79
  -3   2  12  744.54   58.79
  -2   2  12    2.00   15.88
  -1   2  12  120.62   28.54
   0   2  12   70.95   34.17
   1   2  12  505.77   60.73
   2   2  12  118.01   23.44
   2   2  12  166.41   51.82
   3   2  12   53.51   22.76
   3   2  12   18.54   38.44
   4   2  12    6.99   22.21
   4   2  12  -49.38   33.32
   5   2  12  -16.27   22.26
   5   2  12  -64.66   40.84
   6   2  12   11.10   41.51
   7   2  12  -36.72   41.19
 -10   3  12  -21.94   26.63
  10  -3 -12   -1.38   21.28
  -9   3  12   -8.69   24.05
   9  -3 -12   -1.54   19.54
  -8   3  12   70.72   27.12
   8  -3 -12   54.47   25.53
  -7   3  12   49.20   24.32
   7  -3 -12    8.99   16.65
   6  -3 -12   16.84   14.24
  -6   3  12   36.61   20.84
   5  -3 -12   49.36   17.51
  -5   3  12   57.78   21.19
  -4   3  12   82.43   22.40
   4  -3 -12   71.60   18.66
  -3   3  12  115.78   19.93
  -2   3  12  163.71   31.33
  -1   3  12  536.65   51.91
   0   3  12  158.92   43.88
   1   3  12  754.30   78.82
   2   3  12  226.14   60.49
   3   3  12  886.65   76.89
   3   3  12  795.07   86.35
   4   3  12  140.61   37.04
   4   3  12   73.41   54.65
   5   3  12  343.86   60.20
   6   3  12  -57.86   41.04
   7   3  12   12.17   42.45
 -10   4  12  -25.14   29.13
  10  -4 -12   12.46   25.00
  -9   4  12   31.08   27.17
   9  -4 -12   77.99   29.26
  -8   4  12    9.27   21.59
   8  -4 -12   -5.89   15.95
   7  -4 -12   41.97   21.85
  -7   4  12   70.09   26.61
  -6   4  12   82.31   28.22
   6  -4 -12  100.43   25.43
  -5   4  12  352.87   36.74
   5  -4 -12  362.45   38.00
   4  -4 -12   44.71   13.89
  -4   4  12   52.25   20.34
  -3   4  12   42.27   21.79
  -2   4  12  269.28   32.89
  -1   4  12  412.90   45.33
   0   4  12  422.84   54.99
   1   4  12  120.45   52.88
   2   4  12  694.10   79.13
   3   4  12   51.33   21.88
   3   4  12    4.47   51.36
   4   4  12  425.12   66.79
   5   4  12   34.79   50.79
   6   4  12  135.02   58.71
   7   4  12  -68.17   41.44
  10  -5 -12  185.49   39.57
 -10   5  12   93.82   40.09
   9  -5 -12    8.36   19.60
  -9   5  12   -3.91   26.41
  -8   5  12  136.41   32.89
   8  -5 -12  105.63   27.92
   7  -5 -12   -8.34   13.03
  -7   5  12    7.35   19.78
   6  -5 -12  424.35   43.60
  -6   5  12  395.71   42.42
   5  -5 -12   38.93   16.10
  -5   5  12   48.28   24.05
   4  -5 -12  144.94   21.32
  -4   5  12  151.80   24.75
  -3   5  12  147.60   24.03
   3  -5 -12  151.72   20.28
  -2   5  12  216.47   32.02
  -1   5  12    7.61   28.34
   0   5  12  765.49   78.45
   1   5  12  121.16   53.93
   2   5  12   25.57   48.30
   4   5  12    0.25   56.82
   5   5  12  -49.37   51.41
   6   5  12  -18.63   47.47
   7   5  12  -58.95   44.40
   9  -6 -12   46.63   22.79
  -9   6  12   34.58   29.53
  -8   6  12   40.97   26.31
   8  -6 -12    7.35   18.32
  -7   6  12   17.91   22.86
   7  -6 -12   11.63   16.50
  -6   6  12   -2.10   20.09
   6  -6 -12   -3.43   13.67
  -5   6  12  142.16   32.33
   5  -6 -12   85.66   21.45
   4  -6 -12  256.62   28.95
  -4   6  12  264.35   33.30
   3  -6 -12    6.31   10.23
  -3   6  12    4.44   18.19
  -2   6  12   18.86   24.13
  -1   6  12  225.63   40.13
   0   6  12  526.60   66.77
   1   6  12  256.72   65.01
   2   6  12  277.02   75.39
   3   6  12  -93.80   50.87
   4   6  12   48.09   64.18
   5   6  12  -37.51   59.98
   6   6  12  237.11   77.25
   7   6  12  -70.99   41.43
   9  -7 -12   10.69   21.11
  -8   7  12   45.41   26.10
   8  -7 -12   32.28   21.02
   7  -7 -12   -4.79   13.76
  -7   7  12   -2.04   18.42
  -6   7  12   81.86   27.11
   6  -7 -12   82.37   21.34
  -5   7  12  190.47   36.72
   5  -7 -12  106.44   21.48
   4  -7 -12   22.05   12.74
  -4   7  12   63.87   28.84
   3  -7 -12   78.22   17.59
  -3   7  12   83.53   28.43
  -2   7  12   96.08   31.37
  -1   7  12  192.40   47.31
   0   7  12   89.20   46.99
   1   7  12 1777.76  154.48
   2   7  12   40.09   53.41
   3   7  12  379.88   68.30
   4   7  12  -10.29   58.23
   5   7  12  705.52   90.74
   6   7  12  -27.76   53.72
   7   7  12    2.77   61.01
   9  -8 -12   66.92   27.35
   8  -8 -12    2.71   16.76
  -7   8  12  179.68   35.61
   7  -8 -12  125.67   24.27
   6  -8 -12   34.32   15.78
  -6   8  12   20.46   22.08
  -5   8  12  298.74   38.45
   5  -8 -12  308.74   33.48
  -4   8  12   35.18   28.90
   4  -8 -12   21.19   13.61
  -3   8  12  205.45   35.64
   3  -8 -12  202.20   23.66
   2  -8 -12   15.75   10.69
   2  -8 -12    1.13   21.21
  -2   8  12  -12.48   27.11
  -1   8  12  314.63   49.17
   1  -8 -12  160.37   44.02
   0   8  12  110.79   51.41
   0  -8 -12   13.71   26.30
   1   8  12  174.44   63.87
   2   8  12  -19.23   44.20
   3   8  12  -34.35   52.20
   4   8  12  -42.27   64.18
   5   8  12   -7.11   55.33
   6   8  12  -50.10   57.00
   7   8  12  -66.02   50.53
   9  -9 -12    2.12   17.22
   8  -9 -12   29.35   19.15
   7  -9 -12   -4.39   13.63
  -6   9  12  197.61   31.44
   6  -9 -12  193.67   26.75
  -5   9  12   31.91   27.40
   5  -9 -12    5.00   11.74
  -4   9  12  295.73   41.84
   4  -9 -12  297.40   31.35
   3  -9 -12   88.29   34.76
   3  -9 -12  128.32   20.38
  -3   9  12  234.95   48.86
   2  -9 -12  120.73   17.19
   2  -9 -12   91.49   33.61
  -2   9  12  147.44   51.41
  -1   9  12  303.11   69.39
   0   9  12  322.46   75.38
  -1  -9 -12   24.25   30.28
   1   9  12   81.43   64.46
   2   9  12  -26.07   59.28
   3   9  12  455.38   79.28
   4   9  12   96.71   73.76
   5   9  12   21.50   79.37
   6   9  12  -67.01   66.45
   7   9  12  -82.32   58.76
   8   9  12  -90.28   46.80
   8 -10 -12   -7.76   13.57
   7 -10 -12   29.08   17.65
   6 -10 -12   -2.06   13.41
   5 -10 -12    0.03   11.05
  -5  10  12    8.39   26.20
   4 -10 -12   45.66   15.71
  -4  10  12   46.71   33.85
   3 -10 -12   43.23   28.50
   3 -10 -12   73.41   17.16
  -3  10  12   75.80   41.17
   2 -10 -12  257.84   28.14
  -2  10  12  331.17   55.36
   2 -10 -12  242.88   46.38
  -1  10  12  -15.01   45.56
   1 -10 -12    1.67   20.30
   0 -10 -12  207.71   47.23
   0  10  12  394.51   65.24
   1  10  12  -13.40   65.31
  -1 -10 -12   21.83   25.44
  -2 -10 -12  135.44   40.02
   2  10  12  282.34   87.12
   3  10  12   25.49   71.09
   4  10  12  411.33  112.15
   5  10  12    5.59   77.13
   6  10  12   63.79   77.96
   7  10  12   23.79   73.89
   8  10  12 -119.24   55.50
   8 -11 -12  148.17   27.04
   7 -11 -12   -1.04   15.94
   6 -11 -12   33.99   16.93
   5 -11 -12   -1.88   11.24
   4 -11 -12  186.25   24.95
  -4  11  12  262.61   54.31
   3 -11 -12    0.58   23.81
   3 -11 -12   32.85   14.95
  -3  11  12   34.86   44.10
  -2  11  12  383.27   80.54
   1 -11 -12   24.00   26.77
  -1  11  12  104.14   66.69
   0 -11 -12   24.89   27.49
   0  11  12   51.71   63.84
  -1 -11 -12   33.48   25.93
   1  11  12   -1.10   68.62
   2  11  12  194.68   85.83
  -2 -11 -12  158.73   39.78
  -3 -11 -12    7.95   24.53
   3  11  12   30.10   72.47
   4  11  12   77.48   77.16
   5  11  12  105.80   78.03
   6  11  12  -95.08   56.22
   7  11  12  -42.10   55.74
   8  11  12 -118.21   64.78
   8 -12 -12   -4.73   17.60
   7 -12 -12  120.77   27.33
   6 -12 -12   34.94   18.73
   5 -12 -12   24.22   15.75
   4 -12 -12  -13.61    9.63
   3 -12 -12  189.28   43.11
  -3  12  12  338.00   57.10
  -2  12  12  180.33   66.88
  -1  12  12   24.45   53.91
   1 -12 -12    7.50   21.82
   0  12  12 -123.70   59.86
   0 -12 -12   -2.66   20.38
  -1 -12 -12   27.19   26.85
   1  12  12  143.60   85.61
   2  12  12  191.78   93.64
  -2 -12 -12   56.13   32.77
   3  12  12  109.64   83.89
   4  12  12  258.78   96.14
   5  12  12  -49.93   72.06
   6  12  12  -76.70   64.65
   7  12  12  -98.98   54.33
   8  12  12  -74.43   73.27
   7 -13 -12    8.96   15.92
   6 -13 -12   -4.39   12.40
   5 -13 -12   -2.82   10.98
   3 -13 -12    1.04   21.88
   2 -13 -12   10.43   21.26
  -2  13  12   10.74   56.91
  -1  13  12  351.60   90.38
   0 -13 -12  -12.45   20.73
   0  13  12  -15.42   63.45
  -1 -13 -12   30.64   23.57
   1  13  12  -49.88   62.09
  -2 -13 -12    8.72   22.21
   2  13  12  -40.08   62.43
   3  13  12  331.64   99.94
  -3 -13 -12  152.41   43.32
  -4 -13 -12   12.36   25.53
   4  13  12   16.04   84.62
   5  13  12   50.81   79.40
   6  13  12  -39.54   68.67
   7  13  12  -50.66   82.66
   7 -14 -12   56.25   21.67
   6 -14 -12   32.40   17.20
   3 -14 -12   59.16   28.63
   2 -14 -12  110.37   34.30
  -1  14  12   52.66   68.08
   1 -14 -12   18.76   24.51
   0 -14 -12   21.79   23.40
   0  14  12   81.43   70.80
   1  14  12   36.71   68.29
  -1 -14 -12   26.92   23.91
   2  14  12  207.50   99.01
  -3 -14 -12   33.25   27.34
   3  14  12    9.10   74.68
   4  14  12  336.64  110.31
   5  14  12 -107.09   81.77
   6  14  12  -36.85   83.31
   7  14  12 -131.47   82.21
   3 -15 -12   -7.28   21.87
   2 -15 -12   98.24   33.11
   1 -15 -12  -12.97   19.53
   0 -15 -12   22.22   24.46
   0  15  12   75.62   77.08
  -1 -15 -12   25.36   22.53
   1  15  12  103.63   84.75
   2  15  12   30.96   81.80
  -2 -15 -12   10.24   22.36
   3  15  12   -2.24   88.02
  -3 -15 -12   12.51   25.32
  -4 -15 -12   -1.81   22.24
   4  15  12  -29.51   86.16
   5  15  12   14.11   87.45
  -5 -15 -12   -0.36   27.52
   6  15  12  -63.66   71.70
   3 -16 -12   60.68   27.77
   2 -16 -12   11.71   23.55
   1 -16 -12   16.12   21.30
   0 -16 -12   56.91   26.82
  -1 -16 -12    8.56   22.78
   1  16  12   13.02   78.73
   2  16  12  111.62   93.37
  -2 -16 -12   41.59   27.66
  -3 -16 -12   10.92   24.90
   3  16  12   54.57   90.04
   4  16  12   99.01   97.81
  -4 -16 -12   52.59   32.44
  -5 -16 -12   17.61   28.13
   5  16  12  -31.29   75.71
   3 -17 -12   20.30   26.32
   2 -17 -12   27.10   25.66
   1 -17 -12   21.92   23.56
   0 -17 -12   49.14   27.33
  -1 -17 -12   75.82   29.11
   2  17  12  -34.42   81.30
  -2 -17 -12   13.57   22.88
   3  17  12   71.16   81.53
  -3 -17 -12    6.33   22.73
  -4 -17 -12   12.63   24.37
   4  17  12  -11.31   89.39
   2 -18 -12  -12.37   21.75
   1 -18 -12   66.57   31.47
   0 -18 -12    5.72   22.20
  -1 -18 -12   16.04   21.79
  -2 -18 -12    9.88   24.38
  -3 -18 -12   10.10   22.99
   2 -19 -12   -1.88   23.06
   1 -19 -12   36.12   27.84
   0 -19 -12    5.11   23.33
  -1 -19 -12   64.25   31.04
  -3 -18  13   -7.46   17.04
  -2 -18  13   65.71   32.05
   2 -18  13   57.53   63.89
   3 -18  13  -68.46   50.10
  -3 -17  13   41.34   23.81
   1 -17  13  106.08   63.31
   2 -17  13   13.71   60.43
   3 -17  13    8.59   76.27
   4 -17  13  -48.10   76.57
   0 -16  13    0.99   41.31
   1 -16  13  -53.92   52.28
   2 -16  13   20.49   75.94
   3 -16  13   17.43   77.03
   4 -16  13  -30.19   67.07
   5 -16  13  -62.62   69.47
  -1 -15  13  140.31   53.38
   0 -15  13   69.58   53.53
   1 -15  13  178.18   84.61
   2 -15  13   -8.05   72.12
   3 -15  13  236.86  107.82
   4 -15  13    0.93   70.25
   5 -15  13   73.47   78.78
  -2 -14  13   83.66   38.10
  -1 -14  13   -3.32   36.86
   0 -14  13  125.53   68.56
   1 -14  13  -38.45   61.52
   2 -14  13  230.45  112.46
   3 -14  13  -59.88   73.08
   4 -14  13   91.94   75.22
   5 -14  13  -34.81   55.35
   6 -14  13   23.44   62.79
   7  13 -13    4.24   19.75
   6  13 -13   61.86   22.49
  -3 -13  13    0.70   21.39
  -2 -13  13   93.37   40.12
  -1 -13  13   91.61   48.24
   0 -13  13   38.00   57.78
   1 -13  13  -38.60   53.88
   2 -13  13  -17.12   75.19
   3 -13  13  -16.97   65.02
   4 -13  13   39.96   72.63
   5 -13  13  -12.16   53.07
   6 -13  13  -16.00   55.47
   8  12 -13   -4.77   22.14
   7  12 -13  100.22   28.10
   6  12 -13  156.20   29.29
   5  12 -13   13.77   15.28
  -3 -12  13   40.14   25.74
  -2 -12  13  232.60   52.53
  -1 -12  13   -9.91   34.89
   0 -12  13  547.25   96.66
   1 -12  13  -29.71   63.74
   2 -12  13  511.06  125.75
   3 -12  13   18.95   64.99
   4 -12  13  281.89   89.11
   5 -12  13  -28.95   42.04
   6 -12  13  -21.72   44.10
   7 -12  13  -39.70   40.46
   8  11 -13   -7.24   19.14
   7  11 -13  100.83   27.71
   6  11 -13   24.25   18.62
   5  11 -13   31.75   16.79
   4  11 -13    1.69   12.15
  -2 -11  13    6.66   27.21
  -1 -11  13  439.81   70.84
   0 -11  13  -30.34   41.57
   1 -11  13  287.47   99.12
   2 -11  13  -24.89   48.54
   3 -11  13  578.88  102.16
   4 -11  13  -15.67   44.52
   5 -11  13   86.36   54.30
   6 -11  13  -46.97   32.75
   7 -11  13   -1.12   41.14
   8  10 -13   14.05   23.03
   7  10 -13  156.75   31.16
   6  10 -13   66.45   21.54
   5  10 -13   71.45   20.63
   4  10 -13    1.82   13.03
  -1 -10  13   -3.48   28.04
   0 -10  13   56.32   52.88
   1 -10  13    5.04   47.18
   2 -10  13   10.32   55.10
   3 -10  13  -23.73   42.49
   4 -10  13  109.24   51.41
   5 -10  13    9.92   41.45
   6 -10  13   15.79   40.10
   7 -10  13  -34.16   33.74
   8 -10  13   -1.33   39.66
   9   9 -13    3.78   22.90
   8   9 -13  114.63   29.64
   7   9 -13   30.19   18.75
   6   9 -13   64.79   21.52
   5   9 -13  135.79   20.05
  -3  -9  13  379.61   36.87
  -2  -9  13  -17.88   16.19
  -1  -9  13  499.21   68.72
   0  -9  13   -6.41   29.03
   1  -9  13  833.35  110.27
   2  -9  13  -15.49   40.80
   3  -9  13  132.65   59.71
   4  -9  13   35.07   44.31
   5  -9  13  253.56   65.89
   6  -9  13  -17.86   33.43
   7  -9  13   59.28   41.48
   8  -9  13  -11.68   40.58
   9   8 -13   -8.71   24.25
   8   8 -13   15.47   21.71
   7   8 -13    7.20   17.56
   6   8 -13   53.05   18.11
   5   8 -13   86.49   20.18
  -4  -8  13  287.42   32.73
  -3  -8  13   -5.13   18.85
  -2  -8  13  355.63   33.08
  -1  -8  13   -3.92   13.92
   0  -8  13  523.29   71.10
   1  -8  13    1.91   34.06
   2  -8  13  548.17   82.01
   3  -8  13   72.26   45.09
   4  -8  13  191.80   53.04
   5  -8  13  -17.63   29.14
   6  -8  13   94.46   45.30
   7  -8  13    8.79   35.48
   8  -8  13    9.68   37.16
   9   7 -13   -3.72   24.19
   8   7 -13   55.01   25.84
   7   7 -13   20.72   17.44
   6   7 -13  179.48   23.47
   5   7 -13   96.13   17.15
  -4  -7  13  240.48   28.89
  -3  -7  13   31.27   18.29
  -2  -7  13   71.72   17.83
  -1  -7  13    7.62   15.52
   0  -7  13  106.94   37.32
   0  -7  13  139.83   30.25
   1  -7  13  235.26   55.24
   3  -7  13  146.14   49.36
   4  -7  13  -18.24   29.02
   5  -7  13   35.06   33.72
   6  -7  13   45.84   36.65
   7  -7  13   30.87   40.62
   8  -7  13   12.42   37.58
   9  -7  13  -38.09   32.70
   9   6 -13   87.25   30.24
   8   6 -13   27.75   22.44
   7   6 -13   40.49   20.28
   6   6 -13    5.91   14.06
  -4  -6  13  155.05   22.43
  -3  -6  13   26.67   15.52
  -2  -6  13   22.13   14.75
  -1  -6  13  219.03   25.36
   0  -6  13  159.62   27.13
   1  -6  13   31.38   24.19
   1  -6  13  -13.88   22.31
   2  -6  13  262.67   51.31
   3  -6  13   74.81   39.36
   4  -6  13    2.24   28.47
   5  -6  13   40.27   33.59
   6  -6  13   77.39   40.58
   7  -6  13   89.80   44.18
   8  -6  13  -29.76   32.57
   9  -6  13  -43.16   33.65
   9   5 -13   66.90   28.52
   8   5 -13   -7.28   19.34
   7   5 -13   58.98   21.17
   6   5 -13    3.19   15.92
  -5  -5  13  248.17   29.93
  -4  -5  13   89.37   22.94
  -3  -5  13  590.43   47.62
  -2  -5  13   -3.80   12.66
  -1  -5  13  296.07   30.35
   0  -5  13  211.64   30.43
   1  -5  13 1599.91  127.08
   1  -5  13 1213.30  108.24
   2  -5  13   15.36   24.51
   2  -5  13    2.63   28.77
   3  -5  13  339.71   53.91
   4  -5  13   -1.07   23.95
   5  -5  13  501.18   67.21
   6  -5  13  -25.13   24.41
   7  -5  13  106.99   46.97
   8  -5  13  -38.32   32.69
   9  -5  13  -29.56   39.31
  10   4 -13   -2.72   23.04
   9   4 -13   81.99   29.81
   8   4 -13   45.20   22.86
   7   4 -13  166.90   25.19
  -5  -4  13  149.08   23.06
  -4  -4  13  178.89   22.22
  -3  -4  13   85.64   18.82
  -2  -4  13   18.62   13.39
  -1  -4  13  106.35   23.74
   0  -4  13  209.18   31.24
   1  -4  13   59.89   23.56
   1  -4  13   52.24   32.29
   2  -4  13  454.85   54.66
   2  -4  13  326.40   50.25
   3  -4  13  141.23   39.67
   3  -4  13   34.46   27.69
   4  -4  13  132.39   43.01
   5  -4  13   58.71   35.88
   6  -4  13  132.51   47.56
   7  -4  13    2.56   33.69
   8  -4  13  -37.18   33.44
   9  -4  13  -18.18   39.26
   9   3 -13   29.73   23.57
  -6  -3  13  250.77   32.23
  -5  -3  13   81.79   24.53
  -4  -3  13  121.74   23.09
  -3  -3  13    4.03   13.27
  -2  -3  13  135.39   23.91
  -1  -3  13  416.68   39.19
   0  -3  13  173.76   36.07
   1  -3  13   67.31   35.65
   2  -3  13   39.56   34.73
   2  -3  13   30.95   22.54
   3  -3  13  139.87   37.01
   4  -3  13  101.52   38.35
   4  -3  13   69.15   37.89
   5  -3  13   -9.09   23.50
   6  -3  13   62.00   39.55
   7  -3  13  -11.08   33.65
   8  -3  13   16.44   38.91
  -8  -2  13    4.62   28.03
  -7  -2  13   -0.15   23.55
  -6  -2  13  345.29   38.12
  -5  -2  13   34.86   16.97
  -4  -2  13   91.83   16.56
  -3  -2  13   27.21   17.52
  -2  -2  13  599.15   49.09
  -1  -2  13   21.18   19.46
   0  -2  13  467.01   48.36
   1  -2  13   34.97   32.43
   2  -2  13  745.11   75.76
   2  -2  13  884.16   80.82
   3  -2  13   36.62   24.72
   3  -2  13   36.65   34.02
   4  -2  13  493.28   62.79
   4  -2  13  767.45   72.98
   5  -2  13   -0.36   28.07
   5  -2  13  -17.08   27.93
   6  -2  13  244.01   56.72
   7  -2  13    4.01   32.85
 -10  -1  13  -46.39   35.22
  -8  -1  13  123.85   39.52
  -7  -1  13  126.00   33.75
  -6  -1  13   27.26   23.04
  -5  -1  13  115.47   20.62
  -4  -1  13   19.09   15.70
  -3  -1  13   83.04   20.40
  -2  -1  13   94.88   22.17
  -1  -1  13  391.58   38.17
   0  -1  13   30.38   25.92
   1  -1  13   86.75   41.07
   2  -1  13   73.49   37.89
   2  -1  13   49.62   22.88
   3  -1  13  481.73   61.68
   3  -1  13  691.82   66.02
   4  -1  13  118.00   45.50
   4  -1  13  174.79   40.07
   5  -1  13  251.69   60.59
   5  -1  13  264.25   53.51
   6  -1  13   23.67   30.71
   6  -1  13  -23.71   30.55
   7  -1  13  159.57   55.13
 -10   0  13  -64.15   31.44
  -9   0  13   94.14   39.09
  -8   0  13   -8.23   26.84
  -7   0  13  256.26   33.10
  -6   0  13    1.45   17.70
  -5   0  13   84.90   21.51
  -4   0  13   -9.16   12.67
  -3   0  13  369.07   34.56
  -2   0  13   20.08   16.35
  -1   0  13   40.65   21.41
   0   0  13    7.58   22.39
   1   0  13  -28.97   33.64
   2   0  13   31.49   32.52
   2   0  13   -8.89   14.69
   3   0  13   27.49   21.26
   3   0  13   16.46   40.49
   4   0  13   20.39   27.41
   4   0  13   22.74   40.35
   5   0  13  186.39   47.77
   5   0  13  162.25   53.42
   6   0  13  -14.82   30.62
   6   0  13  -19.20   33.14
   7   0  13  -45.43   43.53
 -10   1  13  -43.57   31.60
  10  -1 -13   -0.30   24.24
  -9   1  13  -21.58   25.89
   9  -1 -13  -10.63   20.19
  -8   1  13  103.69   34.99
   8  -1 -13  101.14   31.31
  -7   1  13  132.39   31.11
   7  -1 -13   76.37   25.77
  -6   1  13   14.54   18.25
  -5   1  13  112.63   25.97
  -4   1  13    6.59   15.14
  -3   1  13  147.53   25.75
  -2   1  13   65.45   21.76
  -1   1  13  408.55   42.17
   0   1  13   34.07   30.68
   1   1  13   83.30   45.58
   2   1  13   35.93   19.20
   2   1  13  -23.97   37.18
   3   1  13  718.01   69.08
   3   1  13  631.76   74.86
   4   1  13   65.63   45.14
   4   1  13  138.26   38.80
   5   1  13  296.02   67.04
   5   1  13  166.60   39.88
   6   1  13   50.04   46.86
   7   1  13   98.71   56.63
   8   1  13  -71.18   42.93
  10  -2 -13   31.56   28.02
 -10   2  13  -10.21   28.29
   9  -2 -13   18.29   20.57
  -9   2  13   -4.90   25.13
   8  -2 -13   31.70   22.22
  -8   2  13   18.17   25.66
   7  -2 -13   11.65   17.66
  -7   2  13   25.24   24.09
  -6   2  13  318.32   35.52
   6  -2 -13  341.26   39.99
  -5   2  13   22.10   17.40
  -4   2  13  128.40   24.91
  -3   2  13   25.09   17.02
  -2   2  13  474.93   44.04
  -1   2  13   26.39   24.86
   0   2  13  381.58   47.46
   1   2  13   26.01   37.27
   2   2  13  766.65   79.01
   2   2  13  602.87   61.19
   3   2  13   47.80   21.75
   3   2  13   -4.96   46.70
   4   2  13  924.47   88.08
   5   2  13    5.76   29.79
   5   2  13    7.30   48.60
   6   2  13  216.85   58.22
   7   2  13    5.18   47.91
   8   2  13    8.77   44.19
  10  -3 -13   99.06   35.49
 -10   3  13   54.55   38.02
  -9   3  13    9.18   30.56
   9  -3 -13   -3.73   17.70
  -8   3  13  127.89   35.65
   8  -3 -13  118.93   32.12
   7  -3 -13    0.40   15.32
  -7   3  13    8.18   19.75
  -6   3  13  214.91   29.55
   6  -3 -13  234.50   31.74
  -5   3  13   43.20   21.30
   5  -3 -13   62.88   20.42
  -4   3  13  134.88   26.52
  -3   3  13  -18.59   13.78
  -2   3  13  119.56   29.14
  -1   3  13  235.16   35.77
   0   3  13  175.08   44.98
   1   3  13   74.62   44.41
   2   3  13   -4.32   42.25
   3   3  13   53.97   51.58
   3   3  13   69.08   25.40
   4   3  13   70.33   31.81
   4   3  13   -1.01   45.62
   5   3  13  -38.31   42.86
   6   3  13   76.82   52.21
   7   3  13  -94.75   47.06
   8   3  13  -62.55   46.63
 -10   4  13   -1.73   30.97
  -9   4  13   67.75   34.27
   9  -4 -13   72.70   29.89
  -8   4  13    5.68   25.56
   8  -4 -13   32.57   22.57
   7  -4 -13  183.18   35.52
  -7   4  13  169.59   34.46
   6  -4 -13   -5.95   12.46
  -6   4  13   -2.49   18.15
  -5   4  13  192.46   34.95
   5  -4 -13  136.86   24.13
   4  -4 -13  156.99   22.82
  -4   4  13  147.18   23.79
  -3   4  13   66.15   21.39
  -2   4  13  -27.17   18.91
  -1   4  13   68.46   32.92
   0   4  13  250.18   55.65
   1   4  13   49.66   40.93
   2   4  13  431.50   65.56
   3   4  13   93.54   56.86
   3   4  13  103.96   27.77
   4   4  13    1.83   52.50
   5   4  13   57.91   64.95
   6   4  13   77.55   57.23
   7   4  13 -104.30   48.43
   8   4  13  -71.14   42.30
 -10   5  13   -1.11   31.12
   9  -5 -13   20.01   19.47
  -9   5  13   30.57   28.07
   8  -5 -13   -2.65   14.63
  -8   5  13  -12.86   23.99
  -7   5  13   45.29   23.77
   7  -5 -13   44.10   20.49
  -6   5  13    8.53   18.61
   6  -5 -13   -0.85   14.03
  -5   5  13  203.63   29.79
   5  -5 -13  246.67   29.82
  -4   5  13   40.18   22.66
   4  -5 -13   37.61   15.71
  -3   5  13  441.36   43.82
  -2   5  13  -16.98   17.55
  -1   5  13  246.03   37.61
   0   5  13  287.66   50.65
   1   5  13 1645.77  140.45
   2   5  13  -58.87   42.80
   3   5  13  290.22   80.58
   4   5  13  -40.36   49.79
   5   5  13  660.99   85.23
   6   5  13  -73.64   57.60
   7   5  13   14.29   58.59
   8   5  13  -80.40   42.69
   9  -6 -13   58.04   25.59
  -9   6  13   49.92   28.08
   8  -6 -13   36.34   21.20
  -8   6  13   32.19   26.85
   7  -6 -13   31.85   18.08
  -7   6  13   34.28   24.76
  -6   6  13    3.14   20.89
   6  -6 -13   -2.54   12.32
  -5   6  13  243.33   33.13
   5  -6 -13  239.52   29.95
   4  -6 -13  138.51   22.37
  -4   6  13  195.25   30.99
   3  -6 -13   16.72   11.92
  -3   6  13   10.54   24.30
  -2   6  13   22.39   24.22
  -1   6  13  186.75   44.10
   0   6  13  300.67   66.86
   1   6  13   98.44   52.49
   2   6  13  236.96   71.85
   3   6  13   43.06   57.41
   4   6  13  -11.05   52.31
   5   6  13   27.95   61.42
   6   6  13    4.01   59.88
   7   6  13   22.34   63.43
   9  -7 -13   -7.96   15.77
  -9   7  13    5.99   24.31
  -8   7  13   63.86   28.04
   8  -7 -13   42.79   21.52
  -7   7  13    5.79   22.62
   7  -7 -13    4.67   14.94
   6  -7 -13  210.33   27.87
  -6   7  13  163.32   27.55
  -5   7  13  133.22   32.61
   5  -7 -13   93.03   21.62
   4  -7 -13  195.90   25.34
  -4   7  13  203.24   32.04
  -3   7  13   29.33   25.99
   3  -7 -13   41.43   15.24
  -2   7  13  -20.99   22.68
  -1   7  13  -19.19   37.01
   0   7  13  190.99   61.91
   1   7  13  200.26   62.84
   2   7  13   87.76   61.33
   3   7  13   96.33   62.28
   4   7  13  -62.97   61.71
   5   7  13   -1.94   63.24
   6   7  13   32.15   68.91
   7   7  13  -60.40   51.53
   8   7  13  -79.03   47.90
   9   7  13  -70.61   49.16
   9  -8 -13   -1.80   18.25
   8  -8 -13   36.34   20.44
  -8   8  13   26.74   25.37
  -7   8  13   22.57   23.95
   7  -8 -13   11.82   15.62
   6  -8 -13   27.99   15.51
  -6   8  13   41.49   26.85
   5  -8 -13   64.80   18.66
  -5   8  13   72.09   30.40
  -4   8  13  251.35   38.10
   4  -8 -13  248.70   28.75
   3  -8 -13   27.32   13.29
  -3   8  13   13.46   31.09
  -2   8  13  306.18   47.80
  -1   8  13  -44.88   37.32
   0   8  13  548.55   75.44
   1   8  13  -29.83   38.70
   2   8  13  511.17   78.29
   3   8  13  119.91   78.45
   4   8  13  264.65   89.87
   5   8  13  -20.49   67.44
   6   8  13  105.88   78.51
   7   8  13  -35.87   64.31
   8   8  13 -101.04   58.14
   9   8  13  -90.34   52.60
   9  -9 -13   13.33   19.67
   8  -9 -13   82.88   25.99
   7  -9 -13   13.64   16.55
  -7   9  13    7.10   24.09
   6  -9 -13   51.89   17.98
  -6   9  13   46.18   26.85
   5  -9 -13  131.32   21.94
  -5   9  13  188.24   41.16
   4  -9 -13   30.59   14.44
  -4   9  13   44.19   31.60
  -3   9  13  344.16   49.22
   3  -9 -13  321.21   33.44
  -2   9  13   24.70   38.74
   1  -9 -13  201.28   47.16
  -1   9  13  380.60   57.43
   0   9  13    4.95   53.79
   1   9  13  435.19   72.50
   2   9  13  -99.83   46.79
   3   9  13  111.18   82.06
   4   9  13  113.37   91.83
   5   9  13  310.72   97.43
   6   9  13  -48.22   53.58
   7   9  13  -26.07   58.89
   8 -10 -13  -11.51   14.13
   7 -10 -13   99.50   25.73
   6 -10 -13   41.03   18.00
  -6  10  13   53.54   30.41
  -5  10  13   82.76   33.52
   5 -10 -13   70.33   19.21
   4 -10 -13   -7.29   10.83
  -4  10  13   -1.31   30.46
  -3  10  13   84.63   46.14
   3 -10 -13  110.39   18.51
   3 -10 -13   66.18   34.77
   2 -10 -13   69.09   33.42
   2 -10 -13   75.63   16.97
  -2  10  13  119.97   56.35
   1 -10 -13   -2.79   25.64
  -1  10  13  -53.08   50.54
   0 -10 -13   -8.85   23.37
   0  10  13  -67.75   58.06
   1  10  13 -120.15   58.07
  -1 -10 -13  -13.27   24.82
   2  10  13   -8.73   74.80
   3  10  13  -67.26   73.61
   4  10  13  216.26   92.65
   5  10  13   43.47   70.98
   6  10  13  -20.30   64.59
   7  10  13  -55.88   59.86
   8  10  13 -137.63   63.77
   8 -11 -13   10.68   16.43
   7 -11 -13   74.99   22.03
   6 -11 -13   19.87   15.16
  -5  11  13   35.17   32.77
   5 -11 -13   16.33   15.02
   4 -11 -13   -7.73    9.46
  -4  11  13   -6.72   31.64
   3 -11 -13   63.07   17.57
   3 -11 -13   21.09   26.68
  -3  11  13   51.77   46.23
  -2  11  13    0.62   50.33
   2 -11 -13   -6.26   24.81
  -1  11  13  459.11   71.77
   0  11  13  -30.91   61.14
   0 -11 -13    4.81   23.79
   1  11  13  122.93   82.61
  -1 -11 -13   80.01   36.12
  -2 -11 -13   11.44   23.31
   2  11  13   -5.27   70.55
   3  11  13  183.32   98.67
   4  11  13  140.23   96.84
   5  11  13   80.68   90.17
   6  11  13  -77.06   76.88
   7  11  13  -60.84   64.62
   8  11  13  -91.17   61.73
   7 -12 -13   69.88   21.70
   6 -12 -13  123.47   24.90
   5 -12 -13   -4.75   10.67
   4 -12 -13    5.69   12.53
  -4  12  13   13.58   37.31
  -3  12  13  219.67   63.02
  -2  12  13  418.76   69.20
   1 -12 -13   -5.75   23.58
  -1  12  13   13.60   59.93
   0  12  13  402.82  100.76
   1  12  13   -6.32   65.66
  -1 -12 -13   36.93   27.46
   2  12  13  184.82   96.95
  -2 -12 -13   98.73   37.04
   3  12  13    5.68   92.36
  -3 -12 -13   11.64   24.04
   4  12  13  419.74  122.04
   5  12  13  -64.00   72.82
   6  12  13  -20.89   84.26
   7  12  13  -76.81   70.17
   7 -13 -13    4.94   14.50
   6 -13 -13   29.57   18.09
   5 -13 -13  -16.15    9.42
   3 -13 -13  -22.03   20.96
  -2  13  13  229.97   73.55
  -1  13  13   53.61   66.44
   1 -13 -13   23.95   23.28
   0  13  13   19.11   66.63
   0 -13 -13   10.61   22.06
[truncated: 312,918 more chars]
