# Supplementary material
Source: MDPI journal article supplement (https://www.mdpi.com/2073-4352/13/3/535)
Supplement: s1 [file s1 › 2097680.cif]

 
data_Cu-Gd-valen-dca
 
_audit_creation_method            SHELXL-2014
_chemical_name_systematic
;
 ?
;
_chemical_name_common             complex2
_chemical_melting_point           'not measured'
_chemical_formula_moiety          'C22 H28 Cl Cu Gd N6 O10'
_chemical_formula_sum
 'C22 H28 Cl Cu Gd N6 O10' 
_chemical_formula_weight          792.74

loop_
 _atom_type_symbol
 _atom_type_description
 _atom_type_scat_dispersion_real
 _atom_type_scat_dispersion_imag
 _atom_type_scat_source
 'C'  'C'   0.0033   0.0016
 'International Tables Vol C Tables 4.2.6.8 and 6.1.1.4'
 'H'  'H'   0.0000   0.0000
 'International Tables Vol C Tables 4.2.6.8 and 6.1.1.4'
 'N'  'N'   0.0061   0.0033
 'International Tables Vol C Tables 4.2.6.8 and 6.1.1.4'
 'O'  'O'   0.0106   0.0060
 'International Tables Vol C Tables 4.2.6.8 and 6.1.1.4'
 'Cl'  'Cl'   0.1484   0.1585
 'International Tables Vol C Tables 4.2.6.8 and 6.1.1.4'
 'Cu'  'Cu'   0.3201   1.2651
 'International Tables Vol C Tables 4.2.6.8 and 6.1.1.4'
 'Gd'  'Gd'  -0.1653   3.9035
 'International Tables Vol C Tables 4.2.6.8 and 6.1.1.4'
 
_space_group_crystal_system       monoclinic
_space_group_IT_number            14
_space_group_name_H-M_alt         'P 21/n'
_space_group_name_Hall            '-P 2yn'
 
_shelx_space_group_comment
;
The symmetry employed for this shelxl refinement is uniquely defined
by the following loop, which should always be used as a source of
symmetry information in preference to the above space-group names.
They are only intended as comments.
;
 
loop_
 _space_group_symop_operation_xyz
 'x, y, z'
 '-x+1/2, y+1/2, -z+1/2'
 '-x, -y, -z'
 'x-1/2, -y-1/2, z-1/2'
 
_cell_length_a                    8.8191(7)
_cell_length_b                    16.5598(14)
_cell_length_c                    20.0787(18)
_cell_angle_alpha                 90
_cell_angle_beta                  91.748(2)
_cell_angle_gamma                 90
_cell_volume                      2931.0(4)
_cell_formula_units_Z             4
_cell_measurement_temperature     298(2)
_cell_measurement_reflns_used     3212 
_cell_measurement_theta_min       2.552 
_cell_measurement_theta_max       24.735 
 
_exptl_crystal_description        'block' 
_exptl_crystal_colour             'brown' 
_exptl_crystal_density_meas       ? 
_exptl_crystal_density_method     ?              
_exptl_crystal_density_diffrn     1.797          
_exptl_crystal_F_000              1568
_exptl_transmission_factor_min    0.255                                             
_exptl_transmission_factor_max    0.305                                             
_exptl_crystal_size_max           0.450
_exptl_crystal_size_mid           0.400
_exptl_crystal_size_min           0.380
_exptl_absorpt_coefficient_mu     3.121
_shelx_estimated_absorpt_T_min    0.334
_shelx_estimated_absorpt_T_max    0.383
_exptl_absorpt_correction_type    multi-scan 
_exptl_absorpt_correction_T_min   ? 
_exptl_absorpt_correction_T_max   ? 
_exptl_absorpt_process_details    sadabs 
 
_exptl_special_details
;
 ?
;
 
_diffrn_ambient_temperature       298(2)
_diffrn_radiation_wavelength      0.71073
_diffrn_radiation_type            MoK\a
_diffrn_source                    'fine-focus sealed tube'                       
_diffrn_measurement_device_type   graphite  
_diffrn_measurement_method        'CCD area detector' 
_diffrn_detector_area_resol_mean  'CCD area detector' 
_diffrn_reflns_number             13751
_diffrn_reflns_av_unetI/netI      0.2100
_diffrn_reflns_av_R_equivalents   0.1758
_diffrn_reflns_limit_h_min        -10
_diffrn_reflns_limit_h_max        10
_diffrn_reflns_limit_k_min        -19
_diffrn_reflns_limit_k_max        19
_diffrn_reflns_limit_l_min        -14
_diffrn_reflns_limit_l_max        23
_diffrn_reflns_theta_min          2.552
_diffrn_reflns_theta_max          25.010
_diffrn_reflns_theta_full         25.242
_diffrn_measured_fraction_theta_max   0.993
_diffrn_measured_fraction_theta_full  0.968
_diffrn_reflns_Laue_measured_fraction_max    0.993
_diffrn_reflns_Laue_measured_fraction_full   0.968
_diffrn_reflns_point_group_measured_fraction_max   0.993
_diffrn_reflns_point_group_measured_fraction_full  0.968
_reflns_number_total              5137
_reflns_number_gt                 2559
_reflns_threshold_expression      'I > 2\s(I)'
_reflns_Friedel_coverage          0.000
_reflns_Friedel_fraction_max      .
_reflns_Friedel_fraction_full     .
 
_reflns_special_details
;
 Reflections were merged by SHELXL according to the crystal
 class for the calculation of statistics and refinement.
 
 _reflns_Friedel_fraction is defined as the number of unique
 Friedel pairs measured divided by the number that would be
 possible theoretically, ignoring centric projections and
 systematic absences.
;
 
_computing_data_collection        'Bruker APEX2'
_computing_cell_refinement        'Bruker SAINT'
_computing_data_reduction         'Bruker SAINT'
_computing_structure_solution     'SHELXS-2014 (Sheldrick, 2014)'
_computing_structure_refinement   'SHELXL-2014 (Sheldrick, 2014)'
_computing_molecular_graphics     'Diamond'
_computing_publication_material   'SHELXL-2014 (Sheldrick, 2014)'
 
_refine_special_details
;
 ?
;
_refine_ls_structure_factor_coef  Fsqd
_refine_ls_matrix_type            full
_refine_ls_weighting_scheme       calc
_refine_ls_weighting_details
'w=1/[\s^2^(Fo^2^)+(0.0009P)^2^+150.0000P] where P=(Fo^2^+2Fc^2^)/3'
_atom_sites_solution_primary      ?
_atom_sites_solution_secondary    ?
_atom_sites_solution_hydrogens    mixed
_refine_ls_hydrogen_treatment     constr
_refine_ls_extinction_method      none
_refine_ls_extinction_coef        .
_refine_ls_number_reflns          5137
_refine_ls_number_parameters      346
_refine_ls_number_restraints      6
_refine_ls_R_factor_all           0.1819
_refine_ls_R_factor_gt            0.0822
_refine_ls_wR_factor_ref          0.2086
_refine_ls_wR_factor_gt           0.1644
_refine_ls_goodness_of_fit_ref    0.788
_refine_ls_restrained_S_all       0.788
_refine_ls_shift/su_max           0.001
_refine_ls_shift/su_mean          0.000
 
loop_
 _atom_site_label
 _atom_site_type_symbol
 _atom_site_fract_x
 _atom_site_fract_y
 _atom_site_fract_z
 _atom_site_U_iso_or_equiv
 _atom_site_adp_type
 _atom_site_occupancy
 _atom_site_site_symmetry_order  
 _atom_site_calc_flag
 _atom_site_refinement_flags_posn
 _atom_site_refinement_flags_adp
 _atom_site_refinement_flags_occupancy
 _atom_site_disorder_assembly
 _atom_site_disorder_group
Gd1 Gd 0.48082(9) 0.65152(5) 0.67490(5) 0.0355(3) Uani 1 1 d . . . . .
Cu1 Cu 0.2917(2) 0.57015(12) 0.80580(10) 0.0355(5) Uani 1 1 d . . . . .
Cl1 Cl 0.0056(4) 0.5764(3) 0.7463(3) 0.0487(12) Uani 1 1 d . . . . .
O1 O 0.3515(11) 0.6760(6) 0.7747(5) 0.031(3) Uani 1 1 d . . . . .
O2 O 0.3987(11) 0.5332(6) 0.7294(5) 0.033(3) Uani 1 1 d . . . . .
O3 O 0.5029(12) 0.7968(6) 0.7291(6) 0.038(3) Uani 1 1 d . . . . .
O4 O 0.5734(12) 0.5146(6) 0.6292(5) 0.035(3) Uani 1 1 d . . . . .
O5 O 0.4143(12) 0.7626(7) 0.5961(6) 0.044(3) Uani 1 1 d . . . . .
O6 O 0.4582(12) 0.6485(7) 0.5496(5) 0.042(3) Uani 1 1 d . . . . .
O7 O 0.4120(17) 0.7546(9) 0.4874(6) 0.073(4) Uani 1 1 d . . . . .
O8 O 0.2149(12) 0.6349(9) 0.6422(6) 0.063(4) Uani 1 1 d . . . . .
H8 H 0.1791 0.6062 0.6711 0.095 Uiso 1 1 calc R U . . .
O9 O 0.6747(11) 0.6267(7) 0.7562(5) 0.047(3) Uani 1 1 d . . . . .
H9C H 0.7670 0.6127 0.7532 0.057 Uiso 1 1 d R U . . .
H9D H 0.6454 0.6138 0.7947 0.057 Uiso 1 1 d R U . . .
O10 O 0.5829(14) 0.5863(8) 0.8769(6) 0.060(4) Uani 1 1 d . . . . .
H10A H 0.5994 0.5408 0.8915 0.091 Uiso 1 1 calc R U . . .
N1 N 0.2012(14) 0.6086(9) 0.8852(8) 0.044(4) Uani 1 1 d . . . . .
N2 N 0.2781(14) 0.4626(8) 0.8462(7) 0.036(3) Uani 1 1 d . . . . .
N3 N 0.4279(16) 0.7232(10) 0.5405(8) 0.047(4) Uani 1 1 d . . . . .
N4 N 0.7235(15) 0.6968(9) 0.6283(7) 0.045(4) Uani 1 1 d . . . . .
N5 N 0.8984(18) 0.7907(10) 0.5747(10) 0.067(5) Uani 1 1 d . . . . .
N6 N 0.861(3) 0.9377(12) 0.5634(10) 0.087(7) Uani 1 1 d . . . . .
C1 C 0.3583(11) 0.7408(5) 0.8151(4) 0.032(4) Uani 1 1 d G . . . .
C2 C 0.4453(11) 0.8076(6) 0.7908(5) 0.032(4) Uani 1 1 d G . . . .
C3 C 0.4666(12) 0.8773(6) 0.8292(6) 0.047(5) Uani 1 1 d G . . . .
H3 H 0.5272 0.9194 0.8147 0.056 Uiso 1 1 calc R U . . .
C4 C 0.3949(15) 0.8818(6) 0.8891(6) 0.065(6) Uani 1 1 d G . . . .
H4 H 0.4023 0.9296 0.9133 0.078 Uiso 1 1 calc R U . . .
C5 C 0.3129(13) 0.8190(6) 0.9148(5) 0.059(6) Uani 1 1 d G . . . .
H5 H 0.2679 0.8240 0.9559 0.071 Uiso 1 1 calc R U . . .
C6 C 0.2985(9) 0.7465(5) 0.8774(4) 0.036(4) Uani 1 1 d G . . . .
C7 C 0.2162(14) 0.6820(8) 0.9087(6) 0.046(5) Uani 1 1 d G . . . .
H7 H 0.1703 0.6936 0.9487 0.056 Uiso 1 1 calc R U . . .
C8 C 0.1176(19) 0.5437(11) 0.9186(9) 0.049(5) Uani 1 1 d . . . . .
H8A H 0.0200 0.5348 0.8962 0.059 Uiso 1 1 calc R U . . .
H8B H 0.1009 0.5579 0.9646 0.059 Uiso 1 1 calc R U . . .
C9 C 0.217(2) 0.4676(11) 0.9147(10) 0.053(5) Uani 1 1 d . . . . .
H9A H 0.2992 0.4705 0.9476 0.064 Uiso 1 1 calc R U . . .
H9B H 0.1564 0.4201 0.9237 0.064 Uiso 1 1 calc R U . . .
C10 C 0.3342(12) 0.3986(7) 0.8228(6) 0.041(5) Uani 1 1 d G . . . .
H10 H 0.3216 0.3516 0.8474 0.049 Uiso 1 1 calc R U . . .
C11 C 0.4142(8) 0.3912(5) 0.7631(4) 0.033(4) Uani 1 1 d G . . . .
C12 C 0.4473(10) 0.4577(5) 0.7213(5) 0.029(4) Uani 1 1 d G U . . .
C13 C 0.5437(11) 0.4444(6) 0.6659(5) 0.033(4) Uani 1 1 d G . . . .
C14 C 0.5941(11) 0.3688(6) 0.6516(5) 0.042(4) Uani 1 1 d G . . . .
H14 H 0.6522 0.3619 0.6142 0.050 Uiso 1 1 calc R U . . .
C15 C 0.5636(12) 0.3016(6) 0.6899(6) 0.047(5) Uani 1 1 d G . . . .
H15 H 0.5995 0.2507 0.6790 0.056 Uiso 1 1 calc R U . . .
C16 C 0.4755(11) 0.3143(5) 0.7460(5) 0.040(4) Uani 1 1 d G . . . .
H16 H 0.4562 0.2704 0.7734 0.048 Uiso 1 1 calc R U . . .
C17 C 0.5841(18) 0.8635(9) 0.7002(9) 0.045(5) Uani 1 1 d . . . . .
H17A H 0.5276 0.9125 0.7058 0.067 Uiso 1 1 calc R U . . .
H17B H 0.5967 0.8536 0.6536 0.067 Uiso 1 1 calc R U . . .
H17C H 0.6819 0.8687 0.7221 0.067 Uiso 1 1 calc R U . . .
C18 C 0.675(2) 0.5058(11) 0.5762(10) 0.055(5) Uani 1 1 d . . . . .
H18A H 0.7766 0.5008 0.5940 0.083 Uiso 1 1 calc R U . . .
H18B H 0.6677 0.5523 0.5477 0.083 Uiso 1 1 calc R U . . .
H18C H 0.6486 0.4583 0.5510 0.083 Uiso 1 1 calc R U . . .
C19 C 0.8014(18) 0.7445(10) 0.6047(8) 0.036(4) Uani 1 1 d . . . . .
C20 C 0.867(2) 0.8693(14) 0.5717(10) 0.060(6) Uani 1 1 d . . . . .
C21 C 0.131(2) 0.6243(13) 0.5819(10) 0.068(6) Uani 1 1 d . . . . .
H21A H 0.1403 0.6718 0.5548 0.102 Uiso 1 1 calc R U . . .
H21B H 0.0265 0.6154 0.5912 0.102 Uiso 1 1 calc R U . . .
H21C H 0.1701 0.5785 0.5585 0.102 Uiso 1 1 calc R U . . .
C22 C 0.647(3) 0.6435(14) 0.9209(12) 0.080(7) Uani 1 1 d . . . . .
H22A H 0.6496 0.6953 0.8994 0.119 Uiso 1 1 calc R U . . .
H22B H 0.7485 0.6274 0.9336 0.119 Uiso 1 1 calc R U . . .
H22C H 0.5872 0.6471 0.9599 0.119 Uiso 1 1 calc R U . . .
 
loop_
 _atom_site_aniso_label
 _atom_site_aniso_U_11
 _atom_site_aniso_U_22
 _atom_site_aniso_U_33
 _atom_site_aniso_U_23
 _atom_site_aniso_U_13
 _atom_site_aniso_U_12
Gd1 0.0316(4) 0.0306(4) 0.0439(5) 0.0023(5) -0.0077(3) 0.0024(4)
Cu1 0.0420(11) 0.0267(11) 0.0380(13) 0.0019(10) 0.0039(10) -0.0023(9)
Cl1 0.0235(18) 0.045(3) 0.078(4) 0.001(3) -0.004(2) 0.0009(18)
O1 0.032(5) 0.023(6) 0.039(7) -0.007(5) 0.001(5) 0.004(4)
O2 0.032(5) 0.017(5) 0.050(7) 0.001(5) -0.001(5) 0.000(5)
O3 0.043(6) 0.027(6) 0.046(8) -0.003(6) 0.004(6) -0.004(5)
O4 0.043(6) 0.029(6) 0.034(7) 0.000(5) 0.009(6) 0.000(5)
O5 0.051(7) 0.031(6) 0.049(8) 0.016(6) -0.005(6) 0.018(6)
O6 0.051(6) 0.035(7) 0.042(7) 0.004(6) -0.007(6) 0.013(6)
O7 0.099(11) 0.090(11) 0.030(8) 0.032(8) -0.005(8) 0.026(9)
O8 0.032(6) 0.105(12) 0.051(8) 0.018(8) -0.014(6) 0.002(7)
O9 0.030(5) 0.074(9) 0.038(7) 0.016(6) -0.019(5) 0.008(6)
O10 0.065(8) 0.059(9) 0.057(9) 0.003(7) -0.011(7) -0.011(7)
N1 0.033(7) 0.042(9) 0.056(10) 0.000(8) 0.006(7) -0.013(7)
N2 0.034(7) 0.039(8) 0.035(8) 0.000(7) -0.013(6) -0.008(6)
N3 0.042(8) 0.060(11) 0.040(10) 0.005(9) -0.002(8) -0.008(8)
N4 0.031(7) 0.049(9) 0.054(10) 0.000(8) -0.004(7) 0.002(7)
N5 0.065(11) 0.043(10) 0.094(15) 0.013(10) 0.022(10) -0.010(9)
N6 0.138(18) 0.050(12) 0.072(14) 0.017(11) -0.016(13) -0.025(13)
C1 0.047(9) 0.017(8) 0.031(10) -0.001(7) 0.002(8) 0.017(7)
C2 0.032(8) 0.029(9) 0.035(10) 0.009(8) -0.004(8) 0.006(7)
C3 0.060(11) 0.037(10) 0.043(11) 0.007(9) -0.013(10) -0.020(9)
C4 0.092(15) 0.044(12) 0.058(15) -0.022(11) -0.010(13) 0.000(12)
C5 0.082(14) 0.035(11) 0.062(14) -0.004(10) 0.002(12) -0.002(11)
C6 0.030(8) 0.042(10) 0.036(10) -0.008(9) 0.003(8) -0.001(8)
C7 0.039(9) 0.061(13) 0.040(11) -0.016(10) 0.010(9) -0.002(9)
C8 0.049(10) 0.069(13) 0.029(10) -0.010(10) 0.010(9) -0.014(10)
C9 0.064(12) 0.040(11) 0.057(14) 0.023(10) 0.007(11) -0.001(10)
C10 0.031(8) 0.024(9) 0.065(13) 0.015(9) -0.024(9) -0.005(7)
C11 0.014(7) 0.043(10) 0.041(11) -0.009(9) -0.010(7) -0.004(7)
C12 0.020(6) 0.025(7) 0.039(7) -0.001(6) -0.013(6) 0.005(5)
C13 0.022(7) 0.032(9) 0.044(11) 0.002(8) -0.007(7) 0.003(7)
C14 0.045(9) 0.044(12) 0.037(10) -0.013(9) -0.002(8) 0.001(8)
C15 0.052(10) 0.022(10) 0.065(14) -0.017(9) -0.011(10) 0.000(8)
C16 0.041(9) 0.029(9) 0.049(12) 0.011(9) -0.022(9) -0.004(8)
C17 0.041(9) 0.032(10) 0.061(13) -0.006(9) -0.012(9) -0.009(8)
C18 0.062(12) 0.034(11) 0.069(14) 0.018(10) -0.002(11) 0.015(9)
C19 0.040(9) 0.036(10) 0.033(10) -0.001(8) -0.002(8) -0.014(8)
C20 0.065(13) 0.069(17) 0.044(13) 0.017(12) -0.009(10) -0.025(12)
C21 0.049(11) 0.076(16) 0.077(16) 0.011(12) -0.026(11) -0.016(11)
C22 0.083(15) 0.069(15) 0.085(17) 0.014(15) -0.021(14) -0.003(14)
 
_geom_special_details
;
 All esds (except the esd in the dihedral angle between two l.s. planes)
 are estimated using the full covariance matrix.  The cell esds are taken
 into account individually in the estimation of esds in distances, angles
 and torsion angles; correlations between esds in cell parameters are only
 used when they are defined by crystal symmetry.  An approximate (isotropic)
 treatment of cell esds is used for estimating esds involving l.s. planes.
;
 
loop_
 _geom_bond_atom_site_label_1
 _geom_bond_atom_site_label_2
 _geom_bond_distance
 _geom_bond_site_symmetry_2
 _geom_bond_publ_flag
Gd1 O9 2.364(10) . ?
Gd1 O1 2.370(10) . ?
Gd1 O2 2.368(10) . ?
Gd1 O8 2.431(11) . ?
Gd1 N4 2.478(14) . ?
Gd1 O5 2.486(10) . ?
Gd1 O6 2.518(11) . ?
Gd1 O4 2.587(10) . ?
Gd1 O3 2.645(10) . ?
Gd1 N3 2.972(16) . ?
Gd1 Cu1 3.431(2) . ?
Cu1 N1 1.915(15) . ?
Cu1 O2 1.925(11) . ?
Cu1 O1 1.939(10) . ?
Cu1 N2 1.963(14) . ?
Cu1 Cl1 2.761(4) . ?
O1 C1 1.345(12) . ?
O2 C12 1.334(12) . ?
O3 C2 1.367(14) . ?
O3 C17 1.447(18) . ?
O4 C13 1.405(14) . ?
O4 C18 1.42(2) . ?
O5 N3 1.301(18) . ?
O6 N3 1.278(18) . ?
O7 N3 1.190(18) . ?
O8 C21 1.41(2) . ?
O10 C22 1.40(2) . ?
N1 C7 1.309(18) . ?
N1 C8 1.48(2) . ?
N2 C10 1.266(17) . ?
N2 C9 1.50(2) . ?
N4 C19 1.159(19) . ?
N5 C19 1.31(2) . ?
N5 C20 1.33(3) . ?
N6 C20 1.14(2) . ?
C1 C6 1.377(6) . ?
C1 C2 1.439(6) . ?
C2 C3 1.397(6) . ?
C3 C4 1.378(6) . ?
C4 C5 1.376(6) . ?
C5 C6 1.420(6) . ?
C6 C7 1.445(6) . ?
C8 C9 1.54(2) . ?
C10 C11 1.414(6) . ?
C11 C12 1.421(6) . ?
C11 C16 1.430(6) . ?
C12 C13 1.437(6) . ?
C13 C14 1.363(5) . ?
C14 C15 1.382(6) . ?
C15 C16 1.403(6) . ?
 
loop_
 _geom_angle_atom_site_label_1
 _geom_angle_atom_site_label_2
 _geom_angle_atom_site_label_3
 _geom_angle
 _geom_angle_site_symmetry_1
 _geom_angle_site_symmetry_3
 _geom_angle_publ_flag
O9 Gd1 O1 78.6(4) . . ?
O9 Gd1 O2 76.2(4) . . ?
O1 Gd1 O2 65.7(3) . . ?
O9 Gd1 O8 146.9(4) . . ?
O1 Gd1 O8 76.3(4) . . ?
O2 Gd1 O8 74.0(4) . . ?
O9 Gd1 N4 72.4(4) . . ?
O1 Gd1 N4 135.3(4) . . ?
O2 Gd1 N4 134.8(4) . . ?
O8 Gd1 N4 140.3(4) . . ?
O9 Gd1 O5 136.1(4) . . ?
O1 Gd1 O5 107.5(4) . . ?
O2 Gd1 O5 146.8(4) . . ?
O8 Gd1 O5 72.8(4) . . ?
N4 Gd1 O5 74.1(4) . . ?
O9 Gd1 O6 136.1(4) . . ?
O1 Gd1 O6 145.3(3) . . ?
O2 Gd1 O6 115.4(4) . . ?
O8 Gd1 O6 71.4(4) . . ?
N4 Gd1 O6 70.9(4) . . ?
O5 Gd1 O6 50.8(4) . . ?
O9 Gd1 O4 82.2(4) . . ?
O1 Gd1 O4 127.9(3) . . ?
O2 Gd1 O4 62.8(3) . . ?
O8 Gd1 O4 96.7(4) . . ?
N4 Gd1 O4 81.1(4) . . ?
O5 Gd1 O4 119.6(4) . . ?
O6 Gd1 O4 69.2(4) . . ?
O9 Gd1 O3 80.3(4) . . ?
O1 Gd1 O3 61.9(3) . . ?
O2 Gd1 O3 125.6(4) . . ?
O8 Gd1 O3 105.8(4) . . ?
N4 Gd1 O3 80.0(4) . . ?
O5 Gd1 O3 66.5(4) . . ?
O6 Gd1 O3 115.6(4) . . ?
O4 Gd1 O3 157.3(3) . . ?
O9 Gd1 N3 141.9(4) . . ?
O1 Gd1 N3 129.3(4) . . ?
O2 Gd1 N3 135.1(4) . . ?
O8 Gd1 N3 71.1(4) . . ?
N4 Gd1 N3 69.5(4) . . ?
O5 Gd1 N3 25.7(4) . . ?
O6 Gd1 N3 25.2(4) . . ?
O4 Gd1 N3 94.1(4) . . ?
O3 Gd1 N3 91.0(4) . . ?
O9 Gd1 Cu1 76.2(3) . . ?
O1 Gd1 Cu1 33.1(2) . . ?
O2 Gd1 Cu1 32.7(2) . . ?
O8 Gd1 Cu1 71.0(3) . . ?
N4 Gd1 Cu1 148.6(3) . . ?
O5 Gd1 Cu1 131.9(3) . . ?
O6 Gd1 Cu1 137.0(3) . . ?
O4 Gd1 Cu1 95.4(2) . . ?
O3 Gd1 Cu1 94.2(2) . . ?
N3 Gd1 Cu1 141.8(3) . . ?
N1 Cu1 O2 175.3(5) . . ?
N1 Cu1 O1 95.3(5) . . ?
O2 Cu1 O1 83.4(4) . . ?
N1 Cu1 N2 85.7(6) . . ?
O2 Cu1 N2 94.5(5) . . ?
O1 Cu1 N2 167.0(5) . . ?
N1 Cu1 Cl1 87.1(4) . . ?
O2 Cu1 Cl1 97.5(3) . . ?
O1 Cu1 Cl1 94.6(3) . . ?
N2 Cu1 Cl1 98.4(4) . . ?
N1 Cu1 Gd1 137.1(4) . . ?
O2 Cu1 Gd1 41.6(3) . . ?
O1 Cu1 Gd1 41.8(3) . . ?
N2 Cu1 Gd1 135.3(4) . . ?
Cl1 Cu1 Gd1 96.48(12) . . ?
C1 O1 Cu1 122.3(7) . . ?
C1 O1 Gd1 129.2(7) . . ?
Cu1 O1 Gd1 105.1(4) . . ?
C12 O2 Cu1 124.2(8) . . ?
C12 O2 Gd1 128.0(7) . . ?
Cu1 O2 Gd1 105.7(4) . . ?
C2 O3 C17 117.7(11) . . ?
C2 O3 Gd1 117.9(7) . . ?
C17 O3 Gd1 124.1(9) . . ?
C13 O4 C18 116.1(11) . . ?
C13 O4 Gd1 118.2(7) . . ?
C18 O4 Gd1 124.7(9) . . ?
N3 O5 Gd1 98.5(9) . . ?
N3 O6 Gd1 97.7(10) . . ?
C21 O8 Gd1 136.1(11) . . ?
C7 N1 C8 124.0(14) . . ?
C7 N1 Cu1 124.7(10) . . ?
C8 N1 Cu1 111.2(11) . . ?
C10 N2 C9 123.0(13) . . ?
C10 N2 Cu1 125.2(11) . . ?
C9 N2 Cu1 111.0(10) . . ?
O7 N3 O6 124.7(17) . . ?
O7 N3 O5 122.5(17) . . ?
O6 N3 O5 112.8(14) . . ?
O7 N3 Gd1 176.8(13) . . ?
O6 N3 Gd1 57.1(8) . . ?
O5 N3 Gd1 55.8(8) . . ?
C19 N4 Gd1 153.0(13) . . ?
C19 N5 C20 117.1(17) . . ?
O1 C1 C6 126.3(7) . . ?
O1 C1 C2 115.1(7) . . ?
C6 C1 C2 118.5 . . ?
O3 C2 C3 124.1(8) . . ?
O3 C2 C1 115.0(8) . . ?
C3 C2 C1 120.9 . . ?
C4 C3 C2 117.9 . . ?
C5 C4 C3 123.2 . . ?
C4 C5 C6 118.7 . . ?
C1 C6 C5 120.5 . . ?
C1 C6 C7 123.8 . . ?
C5 C6 C7 115.7 . . ?
N1 C7 C6 125.2(9) . . ?
N1 C8 C9 106.4(13) . . ?
N2 C9 C8 108.4(14) . . ?
N2 C10 C11 126.7(9) . . ?
C10 C11 C12 123.5 . . ?
C10 C11 C16 118.9 . . ?
C12 C11 C16 117.5 . . ?
O2 C12 C11 125.6(7) . . ?
O2 C12 C13 115.9(7) . . ?
C11 C12 C13 118.5 . . ?
C14 C13 O4 125.7(7) . . ?
C14 C13 C12 120.5 . . ?
O4 C13 C12 113.8(7) . . ?
C13 C14 C15 123.5 . . ?
C14 C15 C16 116.6 . . ?
C15 C16 C11 123.3 . . ?
N4 C19 N5 172.7(19) . . ?
N6 C20 N5 169(3) . . ?
 
_refine_diff_density_max    2.316
_refine_diff_density_min   -1.410
_refine_diff_density_rms    0.213

_shelxl_version_number 2014-3

_shelx_res_file
;
TITL 180204g in P2(1)/n
CELL 0.71073 8.8191 16.5598 20.0787 90.000 91.748 90.000
ZERR 4.0000 0.0007 0.0014 0.0018 0.000 0.002 0.000
LATT 1
SYMM 0.5-X, 0.5+Y, 0.5-Z
SFAC C  H  N  O  Cl Cu Gd
UNIT 88 112 24 40 4 4 4
MERG 2
OMIT  -1.00  50.04
L.S. 20
ACTA
BOND
omit  4   1   7
omit     1   2   3
omit     2   0   4
omit     1   3   3
omit     1   1   4
omit     3   0   9
omit    -1  13   7
omit    -2  13   4
omit     1   3   1
omit     3   1   8
omit     7   0   7
omit     3   2   2
omit     1   2   5
omit    -2   3  10
omit     1   3   4
FMAP 2
PLAN 20
ISOR 0.01 c12
SIZE 0.45 0.40 0.38
TEMP 25
WGHT    0.000920  150.000000
FVAR       0.17002
GD1   7    0.480824    0.651517    0.674899    11.00000    0.03157    0.03056 =
         0.04385    0.00234   -0.00773    0.00242
CU1   6    0.291742    0.570149    0.805804    11.00000    0.04204    0.02673 =
         0.03802    0.00191    0.00388   -0.00233
CL1   5    0.005631    0.576371    0.746268    11.00000    0.02348    0.04474 =
         0.07761    0.00115   -0.00410    0.00086
O1    4    0.351500    0.675990    0.774668    11.00000    0.03203    0.02256 =
         0.03881   -0.00661    0.00063    0.00372
O2    4    0.398742    0.533236    0.729419    11.00000    0.03192    0.01743 =
         0.04960    0.00091   -0.00075    0.00042
O3    4    0.502941    0.796794    0.729054    11.00000    0.04283    0.02693 =
         0.04559   -0.00267    0.00379   -0.00382
O4    4    0.573386    0.514604    0.629221    11.00000    0.04284    0.02893 =
         0.03385    0.00005    0.00907   -0.00012
O5    4    0.414306    0.762635    0.596081    11.00000    0.05091    0.03124 =
         0.04897    0.01633   -0.00522    0.01845
O6    4    0.458158    0.648499    0.549633    11.00000    0.05066    0.03464 =
         0.04161    0.00440   -0.00659    0.01272
O7    4    0.411964    0.754605    0.487416    11.00000    0.09889    0.09007 =
         0.03037    0.03154   -0.00460    0.02551
O8    4    0.214933    0.634876    0.642211    11.00000    0.03184    0.10532 =
         0.05112    0.01784   -0.01395    0.00236
AFIX  83
H8    2    0.179136    0.606227    0.671101    11.00000   -1.50000
AFIX   0
O9    4    0.674708    0.626740    0.756244    11.00000    0.02955    0.07353 =
         0.03790    0.01607   -0.01855    0.00812
AFIX   3
H9C   2    0.766958    0.612730    0.753154    11.00000   -1.20000
H9D   2    0.645418    0.613750    0.794734    11.00000   -1.20000
AFIX   0
O10   4    0.582949    0.586328    0.876946    11.00000    0.06461    0.05850 =
         0.05731    0.00319   -0.01078   -0.01124
AFIX  83
H10A  2    0.599434    0.540794    0.891490    11.00000   -1.50000
AFIX   0
N1    3    0.201220    0.608635    0.885249    11.00000    0.03266    0.04243 =
         0.05582   -0.00044    0.00619   -0.01348
N2    3    0.278124    0.462577    0.846240    11.00000    0.03413    0.03865 =
         0.03524   -0.00044   -0.01275   -0.00755
N3    3    0.427888    0.723218    0.540509    11.00000    0.04180    0.05973 =
         0.03995    0.00499   -0.00181   -0.00753
N4    3    0.723494    0.696782    0.628324    11.00000    0.03100    0.04890 =
         0.05355   -0.00004   -0.00417    0.00227
N5    3    0.898380    0.790695    0.574691    11.00000    0.06460    0.04317 =
         0.09425    0.01315    0.02171   -0.00986
N6    3    0.861254    0.937651    0.563435    11.00000    0.13823    0.04967 =
         0.07206    0.01653   -0.01632   -0.02530
AFIX   9
C1    1    0.358346    0.740775    0.815077    11.00000    0.04664    0.01734 =
         0.03069   -0.00114    0.00157    0.01738
C2    1    0.445333    0.807576    0.790847    11.00000    0.03216    0.02945 =
         0.03506    0.00874   -0.00421    0.00568
C3    1    0.466552    0.877301    0.829165    11.00000    0.06000    0.03662 =
         0.04345    0.00681   -0.01272   -0.01953
AFIX  43
H3    2    0.527169    0.919362    0.814689    11.00000   -1.20000
AFIX   5
C4    1    0.394891    0.881820    0.889069    11.00000    0.09200    0.04353 =
         0.05788   -0.02206   -0.00967    0.00048
AFIX  43
H4    2    0.402260    0.929609    0.913281    11.00000   -1.20000
AFIX   5
C5    1    0.312933    0.819018    0.914798    11.00000    0.08199    0.03465 =
         0.06160   -0.00385    0.00163   -0.00248
AFIX  43
H5    2    0.267859    0.823984    0.955871    11.00000   -1.20000
AFIX   5
C6    1    0.298518    0.746497    0.877427    11.00000    0.03004    0.04247 =
         0.03567   -0.00849    0.00343   -0.00086
C7    1    0.216229    0.682039    0.908722    11.00000    0.03867    0.06069 =
         0.04022   -0.01564    0.00954   -0.00172
AFIX  43
H7    2    0.170311    0.693628    0.948698    11.00000   -1.20000
AFIX   0
C8    1    0.117606    0.543741    0.918567    11.00000    0.04884    0.06896 =
         0.02925   -0.00969    0.00962   -0.01418
AFIX  23
H8A   2    0.020002    0.534843    0.896192    11.00000   -1.20000
H8B   2    0.100868    0.557880    0.964645    11.00000   -1.20000
AFIX   0
C9    1    0.216551    0.467634    0.914703    11.00000    0.06356    0.03957 =
         0.05673    0.02292    0.00652   -0.00150
AFIX  23
H9A   2    0.299215    0.470451    0.947613    11.00000   -1.20000
H9B   2    0.156426    0.420050    0.923745    11.00000   -1.20000
AFIX   9
C10   1    0.334231    0.398563    0.822837    11.00000    0.03145    0.02404 =
         0.06518    0.01462   -0.02369   -0.00529
AFIX  43
H10   2    0.321596    0.351582    0.847431    11.00000   -1.20000
AFIX   5
C11   1    0.414150    0.391191    0.763125    11.00000    0.01417    0.04274 =
         0.04135   -0.00856   -0.01019   -0.00381
C12   1    0.447266    0.457661    0.721278    11.00000    0.02038    0.02512 =
         0.03916   -0.00080   -0.01317    0.00509
C13   1    0.543688    0.444427    0.665892    11.00000    0.02247    0.03162 =
         0.04377    0.00155   -0.00728    0.00325
C14   1    0.594106    0.368773    0.651643    11.00000    0.04459    0.04422 =
         0.03710   -0.01328   -0.00184    0.00137
AFIX  43
H14   2    0.652193    0.361941    0.614169    11.00000   -1.20000
AFIX   5
C15   1    0.563569    0.301633    0.689886    11.00000    0.05199    0.02221 =
         0.06550   -0.01657   -0.01112   -0.00041
AFIX  43
H15   2    0.599539    0.250677    0.678976    11.00000   -1.20000
AFIX   5
C16   1    0.475544    0.314255    0.746005    11.00000    0.04135    0.02854 =
         0.04891    0.01119   -0.02210   -0.00368
AFIX  43
H16   2    0.456167    0.270422    0.773424    11.00000   -1.20000
AFIX   0
C17   1    0.584123    0.863528    0.700215    11.00000    0.04053    0.03239 =
         0.06125   -0.00551   -0.01172   -0.00867
AFIX 137
H17A  2    0.527592    0.912482    0.705772    11.00000   -1.50000
H17B  2    0.596735    0.853642    0.653599    11.00000   -1.50000
H17C  2    0.681893    0.868726    0.722145    11.00000   -1.50000
AFIX   0
C18   1    0.674768    0.505764    0.576175    11.00000    0.06223    0.03444 =
         0.06865    0.01767   -0.00245    0.01535
AFIX 137
H18A  2    0.776613    0.500781    0.593969    11.00000   -1.50000
H18B  2    0.667726    0.552275    0.547709    11.00000   -1.50000
H18C  2    0.648557    0.458255    0.550959    11.00000   -1.50000
AFIX   0
C19   1    0.801376    0.744542    0.604696    11.00000    0.03979    0.03596 =
         0.03330   -0.00063   -0.00201   -0.01367
C20   1    0.867390    0.869348    0.571676    11.00000    0.06481    0.06944 =
         0.04397    0.01711   -0.00899   -0.02539
C21   1    0.131270    0.624290    0.581852    11.00000    0.04879    0.07604 =
         0.07672    0.01074   -0.02592   -0.01553
AFIX 137
H21A  2    0.140307    0.671780    0.554841    11.00000   -1.50000
H21B  2    0.026471    0.615351    0.591162    11.00000   -1.50000
H21C  2    0.170088    0.578532    0.558469    11.00000   -1.50000
AFIX   0
C22   1    0.647136    0.643548    0.920912    11.00000    0.08287    0.06937 =
         0.08482    0.01393   -0.02128   -0.00283
AFIX 137
H22A  2    0.649628    0.695261    0.899364    11.00000   -1.50000
H22B  2    0.748537    0.627423    0.933553    11.00000   -1.50000
H22C  2    0.587177    0.647125    0.959912    11.00000   -1.50000
AFIX   0
HKLF 4

REM  180204g in P2(1)/n
REM R1 =  0.0822 for    2559 Fo > 4sig(Fo)  and  0.1819 for all    5137 data
REM    346 parameters refined using      6 restraints

END

WGHT      0.0956      0.0000

REM Highest difference peak  2.316,  deepest hole -1.410,  1-sigma level  0.213
Q1    1   0.3959  0.6428  0.7110  11.00000  0.05    2.32
Q2    1   0.5676  0.6445  0.6394  11.00000  0.05    2.25
Q3    1   0.2118  0.5869  0.8404  11.00000  0.05    1.32
Q4    1   0.5078  0.5756  0.7146  11.00000  0.05    1.20
Q5    1   0.4788  0.5772  0.6328  11.00000  0.05    1.14
Q6    1   0.3732  0.5559  0.7752  11.00000  0.05    1.07
Q7    1   0.4478  0.7237  0.6397  11.00000  0.05    1.07
Q8    1   0.3829  0.5983  0.7828  11.00000  0.05    1.04
Q9    1   0.4390  0.6443  0.7662  11.00000  0.05    1.02
Q10   1   0.6686  0.7339  0.5451  11.00000  0.05    0.88
Q11   1  -0.0395  0.5750  0.8015  11.00000  0.05    0.86
Q12   1   0.5145  0.6539  0.5838  11.00000  0.05    0.82
Q13   1   0.2592  0.6563  0.7120  11.00000  0.05    0.81
Q14   1   0.5942  0.6458  0.9776  11.00000  0.05    0.77
Q15   1   0.3173  0.6433  0.6344  11.00000  0.05    0.76
Q16   1   0.2178  0.6438  0.7992  11.00000  0.05    0.72
Q17   1   0.1428  0.6364  0.6758  11.00000  0.05    0.71
Q18   1   0.0818  0.6258  0.7517  11.00000  0.05    0.64
Q19   1   0.7652  0.4578  0.5339  11.00000  0.05    0.62
Q20   1   0.0885  0.5585  0.7159  11.00000  0.05    0.61
;
_shelx_res_checksum   57743
# start Validation Reply Form
_vrf_PLAT973_Cu-Gd-valen-dca              
;
PROBLEM: Check Calcd Positive Resid. Density on       Gd1       1.83 eA-3  
RESPONSE: Gd1 is a heavy atom and this alert is often found for molecules 
of this type.
;
_shelx_hkl_file
;
   2   0   0 1350.18  110.94
  -2   0   0 1411.50   91.19
   3   0   0   -2.80    4.95
  -3   0   0   -1.21    3.81
   4   0   0  775.66   64.77
   4   0   0  720.83   49.43
  -4   0   0  749.18   52.75
  -5   0   0    2.81    7.19
   5   0   0   -4.74    9.20
  -6   0   0  241.86   24.48
   6   0   0  213.64   23.29
   6   0   0  249.69   31.54
  -7   0   0   -9.87   11.81
   7   0   0   -8.98   11.60
   8   0   0   22.59   16.92
   9   0   0  -14.06   15.99
  10   0   0  109.63   29.40
  11   0   0   32.92   25.81
  11  -1   0   -8.68   21.69
  10  -1   0   57.20   26.36
   9  -1   0   -9.57   18.32
   8  -1   0   47.63   17.56
   7  -1   0   -6.51   11.44
   7  -1   0   -0.05   17.32
  -7   1   0  -12.49   15.11
   6  -1   0   98.23   22.26
   6  -1   0  126.15   17.35
  -6   1   0  149.49   19.33
  -5   1   0   94.09   13.97
   5  -1   0   99.78   15.10
   5  -1   0   78.54   16.86
   4  -1   0  336.92   25.79
  -4   1   0  330.31   26.01
   4  -1   0  319.79   32.68
  -3   1   0   25.50    6.24
   3  -1   0   27.24    7.70
   3  -1   0   16.39    7.91
   2  -1   0  777.60   49.53
   2  -1   0  808.20   67.06
  -2   1   0  860.21   54.94
   1  -1   0 2001.74  159.43
   1   1   0 2044.54  117.79
   2   1   0  809.97   51.29
   2   1   0  866.31   56.36
  -3  -1   0   11.96    6.17
   3   1   0    9.50    7.11
   3   1   0   15.56    6.63
   4   1   0  339.99   34.91
  -4  -1   0  383.35   29.16
   4   1   0  398.12   29.59
   5   1   0   88.59   15.17
   5   1   0   78.81   17.42
  -5  -1   0   82.81   13.24
   6   1   0  123.19   18.18
   6   1   0   98.92   23.65
  -6  -1   0  128.98   17.11
  -7  -1   0   15.46   13.57
   7   1   0    2.88   12.93
   8   1   0   54.05   21.82
   9   1   0   -0.19   15.36
  10   1   0   44.52   22.97
  11   1   0   -5.03   21.31
  11  -2   0  139.41   33.67
  10  -2   0    9.41   22.34
   9  -2   0   96.51   24.08
   8  -2   0    9.65   15.84
   8  -2   0    8.05   23.07
   7  -2   0  144.09   29.16
   7  -2   0  150.71   21.14
   6  -2   0   35.41   14.07
  -6   2   0   12.57   13.89
   6  -2   0    5.04   15.36
   5  -2   0  185.50   18.71
  -5   2   0  190.27   19.88
   5  -2   0  180.03   25.07
  -4   2   0   13.13    8.56
   4  -2   0    4.51    6.94
  -3   2   0   71.62    9.37
   3  -2   0   50.28   11.52
   3  -2   0   66.93    9.40
  -2   2   0  427.41   31.68
   2  -2   0  415.26   27.35
   2  -2   0  411.76   36.68
   1  -2   0  512.86   42.82
   1   2   0  902.16   62.73
   1   2   0  956.99   55.17
   2   2   0  442.56   31.54
   2   2   0  528.64   35.29
   3   2   0   53.83    9.76
   3   2   0   67.01    9.20
   3   2   0   49.56    9.13
   4   2   0    4.37    9.55
   5   2   0  211.63   26.49
  -5  -2   0  179.31   19.92
   5   2   0  238.28   22.67
  -6  -2   0    9.58   11.32
   6   2   0   19.79   13.12
   6   2   0  -11.38   15.19
  -7  -2   0  119.33   19.43
   7   2   0  122.50   23.67
   8   2   0  -12.60   17.92
   9   2   0  103.69   26.84
  10   2   0    1.73   21.97
  11   2   0  100.12   29.03
  11  -3   0   14.30   20.43
  10  -3   0   65.98   26.31
   9  -3   0   29.19   17.43
   8  -3   0   15.99   16.44
   8  -3   0   30.36   23.48
   7  -3   0  305.39   39.11
   7  -3   0  270.29   28.37
   6  -3   0   91.99   23.66
   6  -3   0   89.80   15.45
  -6   3   0   69.93   19.59
   5  -3   0  200.98   26.41
   5  -3   0  175.74   18.41
  -5   3   0  187.93   21.45
   4  -3   0   28.47   14.16
  -4   3   0   41.03   12.24
   4  -3   0   41.94   10.85
   3  -3   0  812.10   52.28
  -3   3   0  878.42   61.75
   3  -3   0  820.27   71.64
   2  -3   0  402.15   34.51
  -2   3   0  381.45   30.68
   2  -3   0  343.28   24.78
  -1   3   0  980.54   70.57
   1  -3   0 1116.97   85.84
   0   3   0   -1.11    3.28
   0  -3   0    5.79    2.93
   2   3   0  622.42   39.94
   3   3   0  945.77   63.76
   3   3   0 1091.38   71.32
   4   3   0   44.90   11.17
   4   3   0   33.89   11.23
   5   3   0  221.25   23.25
   5   3   0  251.49   28.40
  -5  -3   0  232.07   22.56
   6   3   0   86.27   19.26
  -6  -3   0   50.60   17.36
   7   3   0  326.76   33.39
  -7  -3   0  313.56   31.83
   8   3   0   -3.13   17.74
  -8  -3   0   -3.81   15.61
   9   3   0    7.38   21.68
  10   3   0   35.31   23.16
  11   3   0   10.59   26.40
  10  -4   0   35.94   23.08
   9  -4   0   54.37   19.73
   8  -4   0   95.01   31.76
   8  -4   0   79.73   22.11
   7  -4   0   47.77   22.98
  -6   4   0  227.03   30.18
   6  -4   0  274.37   35.30
   6  -4   0  270.47   24.87
   5  -4   0   11.91   16.52
  -5   4   0   14.87   14.52
  -4   4   0  305.36   32.67
   4  -4   0  365.55   26.33
   4  -4   0  342.58   35.44
  -3   4   0  310.83   30.75
   3  -4   0  334.51   33.20
   3  -4   0  309.07   23.32
   2  -4   0  411.25   27.39
   1  -4   0   60.27    9.58
  -1   4   0   59.00    8.11
   1  -4   0   51.28    6.80
   0  -4   0 2044.47  154.47
   0   4   0 1811.67  127.89
   1   4   0   64.10    9.51
   1   4   0   80.91    7.32
   2   4   0  715.31   45.07
   2   4   0  697.59   51.31
   3   4   0  483.93   33.92
   3   4   0  456.25   37.09
   4   4   0  415.19   33.69
   4   4   0  470.97   36.53
   5   4   0   24.39   13.40
   6   4   0  329.86   31.88
  -6  -4   0  307.37   30.26
  -7  -4   0   29.03   16.17
   7   4   0   36.13   18.75
   8   4   0   77.65   25.61
  -8  -4   0   54.51   23.18
   9   4   0   19.38   17.62
  10   4   0   -1.57   24.16
  11   4   0    6.29   24.21
   9  -5   0   11.48   17.68
   9  -5   0   32.41   28.64
   8  -5   0  316.81   45.42
   8  -5   0  318.60   32.08
   7  -5   0   46.39   25.34
   7  -5   0   52.38   16.63
   6  -5   0   36.93   21.09
   6  -5   0   62.04   13.96
   5  -5   0    5.55    8.95
   5  -5   0  -19.41   13.98
  -5   5   0   23.48   18.97
   4  -5   0  614.29   60.84
  -4   5   0  687.43   56.25
   4  -5   0  665.05   44.05
   3  -5   0   68.73   18.80
  -3   5   0  118.87   17.96
   3  -5   0   82.69   11.36
   2  -5   0  125.24   11.84
  -2   5   0  119.26   14.27
   2  -5   0  150.94   18.18
   1  -5   0  116.51   16.57
   1  -5   0  130.12   12.28
  -1   5   0  159.19   14.81
   0   5   0    3.57    5.77
   0  -5   0    7.84    5.60
   1   5   0  171.95   17.56
  -1  -5   0  143.40   15.33
   1   5   0  155.03   12.19
   2   5   0  176.81   15.72
   2   5   0  200.85   19.99
   3   5   0  119.87   15.13
   3   5   0   96.16   15.24
   4   5   0  891.17   58.09
   4   5   0  811.12   62.98
   5   5   0   -3.58   11.32
   5   5   0   -7.97   10.38
   6   5   0   36.83   15.50
  -7  -5   0   26.13   19.43
   7   5   0   12.67   16.44
  -8  -5   0  285.89   34.71
   8   5   0  364.07   37.83
   9   5   0   -2.14   18.34
  10   5   0   41.01   24.72
  11   5   0  -15.85   19.93
   9  -6   0   88.10   35.83
   8  -6   0   57.88   20.12
   8  -6   0   88.89   32.42
   7  -6   0   66.16   17.35
   7  -6   0   82.92   25.98
   6  -6   0  103.73   15.65
   6  -6   0  113.73   30.39
  -5   6   0  130.52   25.76
   5  -6   0  101.64   25.83
  -4   6   0  169.41   24.82
   4  -6   0  158.08   16.60
   4  -6   0  121.04   23.59
  -3   6   0    9.41    9.90
   3  -6   0    7.85    7.15
  -2   6   0  676.63   50.05
   2  -6   0  650.30   42.94
   2  -6   0  699.73   61.48
   1  -6   0    0.76    4.97
  -1   6   0   -0.46    6.51
   0  -6   0   43.15    9.40
   0   6   0   42.75    8.97
   1   6   0    4.39    4.24
  -1  -6   0   -4.98    4.31
   1   6   0    4.72    6.89
   2   6   0  960.50   61.36
   2   6   0 1007.17   71.89
   3   6   0   -0.30   11.98
   3   6   0   -2.80    7.49
   4   6   0  204.79   24.42
   4   6   0  226.98   23.16
   5   6   0  145.08   19.63
   5   6   0  166.76   22.12
   6   6   0   95.45   21.93
   6   6   0  129.11   19.81
   7   6   0   65.28   23.72
  -7  -6   0   52.13   20.11
   8   6   0   36.83   21.79
  -8  -6   0   74.34   23.91
   9   6   0   21.28   21.77
  -9  -6   0   71.17   28.79
  10   6   0  -16.34   21.85
  11   6   0    3.41   25.60
  10  -7   0   16.23   36.38
   9  -7   0   36.50   30.67
   8  -7   0   98.76   34.75
   7  -7   0  400.21   49.94
   7  -7   0  336.22   31.83
   6  -7   0   -3.94   18.27
   6  -7   0   25.74   11.83
   5  -7   0  138.31   27.58
   5  -7   0  127.85   15.57
  -5   7   0  119.66   24.17
  -4   7   0   22.95   14.21
  -3   7   0 1273.16   90.64
   3  -7   0 1274.36   77.97
   2  -7   0   12.70    7.13
  -2   7   0   19.60   10.14
   1  -7   0 1081.64   90.10
  -1   7   0 1024.89   74.44
   0   7   0  -10.90    8.61
  -1  -7   0 1287.65   99.06
   1   7   0 1115.68   85.13
  -2  -7   0    8.84    6.29
   2   7   0   16.84    7.18
   2   7   0    9.98   11.90
   3   7   0 1889.32  120.47
   3   7   0 2095.08  139.06
   4   7   0    3.72   13.25
   4   7   0   -7.49    8.65
   5   7   0  195.80   23.61
   5   7   0  180.06   24.41
   6   7   0    1.47   14.43
   6   7   0    8.13   15.02
   7   7   0  366.94   38.38
  -7  -7   0  425.00   40.16
  -8  -7   0   68.96   26.74
   8   7   0   34.32   23.17
  -9  -7   0   30.99   24.31
   9   7   0   -0.96   20.68
  10   7   0  -11.18   23.52
  10  -8   0  -12.07   38.03
   9  -8   0  134.79   44.35
   8  -8   0    7.22   28.80
   7  -8   0   99.71   33.30
   6  -8   0  -17.33   19.86
   5  -8   0   66.92   23.75
   5  -8   0   58.94   14.35
  -4   8   0  106.64   19.82
   4  -8   0   87.46   13.41
   4  -8   0  133.58   29.54
  -3   8   0  305.53   28.92
   3  -8   0  282.44   23.59
   3  -8   0  299.39   35.96
   2  -8   0   70.40   11.20
   2  -8   0   19.60   18.61
  -1   8   0   -0.10    9.58
   0   8   0    1.31    8.82
  -1  -8   0   -8.65    6.38
   1   8   0   -2.82   11.29
   2   8   0   85.93   18.50
  -2  -8   0   45.64   12.57
   3   8   0  431.46   39.27
   3   8   0  373.94   31.11
   4   8   0  127.04   17.28
   4   8   0  116.39   22.14
   5   8   0   64.89   21.45
   5   8   0   76.21   18.26
   6   8   0   -8.11   14.22
   6   8   0   -3.55   16.24
   7   8   0   53.83   21.78
  -8  -8   0    5.73   21.19
   8   8   0  -29.65   14.25
  -9  -8   0   95.91   31.23
   9   8   0   51.69   25.93
  10   8   0  -21.66   26.69
  10  -9   0   61.97   44.47
   9  -9   0   16.95   36.76
   8  -9   0  123.85   42.02
   7  -9   0   29.16   25.96
   6  -9   0   47.87   24.65
   5  -9   0  249.51   39.23
  -4   9   0  185.11   24.18
   4  -9   0  193.06   30.91
  -3   9   0  138.20   20.35
   3  -9   0  171.22   17.60
   3  -9   0  109.28   28.38
  -2   9   0    7.73   10.48
   2  -9   0  -10.77   12.52
   1  -9   0  391.75   45.91
  -1   9   0  507.01   39.75
   0   9   0  -11.21    9.74
   1   9   0  440.27   37.90
  -1  -9   0  382.98   39.88
   2   9   0   14.73    9.29
   2   9   0   25.03   14.85
   3   9   0  194.33   26.71
   3   9   0  137.58   18.14
   4   9   0  239.28   32.13
   4   9   0  305.07   27.73
   5   9   0  318.07   35.62
   5   9   0  285.74   29.86
   6   9   0   19.17   17.07
   6   9   0   38.50   22.48
   7   9   0    4.00   15.88
   7   9   0   20.19   21.61
   8   9   0   93.90   29.99
  -8  -9   0  121.75   32.77
   9   9   0  -22.98   23.83
  -9  -9   0   31.18   27.85
  10   9   0   26.90   30.63
  10 -10   0   62.05   45.10
   9 -10   0   20.07   37.22
   8 -10   0   13.92   36.00
   7 -10   0   34.03   32.23
   6 -10   0  136.71   38.19
   5 -10   0   16.64   23.16
   4 -10   0  191.28   32.97
  -4  10   0  199.65   26.76
   3 -10   0   54.27   25.81
  -3  10   0   75.44   19.57
   2 -10   0  243.82   23.88
   2 -10   0  328.93   38.24
  -2  10   0  314.09   30.31
  -1  10   0  179.44   21.11
   1 -10   0   91.55   23.88
   0  10   0  932.00   70.60
   0 -10   0  920.59   82.61
  -1 -10   0   98.43   19.37
   1  10   0  162.61   23.08
  -2 -10   0  368.79   35.29
   2  10   0  354.95   36.03
   3  10   0   70.76   15.37
   3  10   0   72.55   24.74
   4  10   0  272.05   34.12
   4  10   0  234.73   25.84
   5  10   0   23.54   14.58
   5  10   0   15.54   22.29
   6  10   0  116.30   29.44
   6  10   0  121.73   27.01
   7  10   0    3.56   17.91
   7  10   0   22.49   23.16
   8  10   0   23.83   22.90
  -8 -10   0   35.44   22.84
  -9 -10   0  -11.24   25.86
   9  10   0  -40.03   24.55
  10  10   0  -19.09   28.08
  10 -11   0   84.12   50.70
   9 -11   0   -7.75   33.15
   8 -11   0   32.07   37.59
   7 -11   0   32.74   29.97
   6 -11   0  271.66   46.63
   5 -11   0   96.87   30.94
  -4  11   0   18.59   16.92
   4 -11   0    2.52   23.19
   3 -11   0  116.30   30.30
  -3  11   0  117.52   20.92
   2 -11   0  120.65   27.11
  -2  11   0  185.10   23.69
   1 -11   0  145.57   27.75
  -1  11   0  189.20   23.50
   0 -11   0   -1.76   12.66
   0  11   0    0.56   13.14
  -1 -11   0  132.96   23.22
   1  11   0  198.97   26.21
   2  11   0  222.16   30.11
   3  11   0  148.52   19.90
   3  11   0  172.70   28.30
   4  11   0    9.49   15.60
   4  11   0    2.48   18.44
   5  11   0   80.29   24.50
   5  11   0   96.69   30.49
   6  11   0  252.01   36.04
   6  11   0  239.75   31.10
   7  11   0    7.12   21.34
   7  11   0   30.29   26.53
   8  11   0   -6.29   24.00
  -9 -11   0   23.09   26.88
   9  11   0  -23.65   22.41
 -10 -11   0   57.38   34.50
  10  11   0    0.65   27.89
   9 -12   0   38.08   45.49
   8 -12   0   18.82   39.58
   7 -12   0  160.33   41.60
   6 -12   0  166.55   39.83
   5 -12   0  165.11   34.83
   4 -12   0  165.19   37.73
  -3  12   0   24.32   17.57
   3 -12   0   26.72   23.09
   2 -12   0   23.43   21.87
  -2  12   0   51.18   19.11
  -1  12   0  222.84   28.43
   1 -12   0  212.94   32.67
  -1 -12   0  191.90   26.06
   1  12   0  200.72   28.44
   2  12   0   23.88   17.74
   3  12   0   24.62   23.58
   4  12   0  138.77   28.29
   4  12   0  149.53   34.90
   5  12   0  190.57   27.54
   5  12   0  168.05   30.59
   6  12   0  127.68   35.52
   6  12   0  131.50   31.44
   7  12   0  119.93   35.95
   7  12   0  107.41   33.56
   8  12   0   16.08   22.57
   9  12   0    8.66   24.07
  -9 -12   0   21.38   24.44
   9 -13   0   14.70   43.25
   8 -13   0   16.82   35.06
   7 -13   0   17.34   38.41
   6 -13   0  178.58   41.66
   5 -13   0  282.61   47.49
   4 -13   0    8.70   26.19
  -3  13   0   59.07   24.25
   3 -13   0   91.39   32.11
  -2  13   0   19.78   16.60
   2 -13   0   14.23   20.98
  -1  13   0  321.17   35.74
   1 -13   0  328.96   41.18
   0  13   0   24.28   17.73
   0 -13   0    0.46   15.07
   1  13   0  307.12   36.03
   2  13   0   21.01   22.36
   3  13   0   80.74   29.37
   4  13   0   16.74   19.95
   4  13   0   19.38   25.95
   5  13   0  203.61   29.51
   5  13   0  289.93   40.46
   6  13   0   45.53   26.71
   6  13   0   63.03   32.03
   7  13   0   -2.88   19.39
   7  13   0   10.78   25.86
   8  13   0  -32.98   25.45
  -9 -13   0  -12.53   20.31
   9  13   0  -44.98   28.38
   8 -14   0   37.88   43.56
   7 -14   0   67.80   45.80
   6 -14   0   90.82   41.96
   5 -14   0   92.74   38.88
   4 -14   0  255.16   43.36
  -3  14   0    5.44   17.22
   3 -14   0  -17.70   20.92
  -2  14   0  229.07   32.49
   2 -14   0  259.50   42.35
   1 -14   0  -12.50   17.55
  -1  14   0   32.06   23.48
   0 -14   0  314.09   41.15
   0  14   0  308.04   37.25
   1  14   0   -7.91   20.42
   2  14   0  179.67   31.73
   3  14   0  -13.41   23.58
   4  14   0  207.08   34.97
   5  14   0   28.39   25.98
   5  14   0   31.24   31.22
   6  14   0   53.82   30.59
   6  14   0   32.52   34.23
   7  14   0   57.98   36.71
   7  14   0   16.80   24.28
   8  14   0    9.94   33.69
   8  14   0   -5.95   27.94
   9  14   0    3.02   28.89
   8 -15   0   58.10   49.71
   7 -15   0   35.36   45.89
   6 -15   0   95.61   47.27
   5 -15   0   31.97   36.21
   4 -15   0   42.26   36.39
   3 -15   0  131.17   39.97
  -3  15   0   95.57   30.45
   2 -15   0  -18.73   22.88
  -2  15   0    1.26   20.69
  -1  15   0   65.71   27.11
   1 -15   0   25.82   23.89
   0  15   0    0.10   20.56
   0 -15   0  -17.58   18.02
   1  15   0   35.07   22.25
   2  15   0   14.33   26.16
   3  15   0  130.88   36.71
   4  15   0    1.40   29.58
   5  15   0   11.56   29.47
   6  15   0   89.68   40.22
   6  15   0   66.97   33.47
   7  15   0   25.77   27.30
   7  15   0   24.18   37.04
   8  15   0   -6.37   27.09
   8  15   0   39.14   36.91
   7 -16   0   53.29   48.30
   6 -16   0   35.61   43.84
   5 -16   0   71.55   38.07
   4 -16   0  130.56   44.19
   3 -16   0   26.36   32.40
  -2  16   0  200.30   34.22
   2 -16   0  239.53   41.29
   1 -16   0   38.23   26.76
  -1  16   0   35.57   27.87
   0  16   0   39.38   27.70
   1  16   0    6.75   24.76
   2  16   0  186.51   34.03
   3  16   0    5.07   28.82
   4  16   0   63.32   35.73
   5  16   0   23.81   34.93
   6  16   0   -2.01   35.84
   7  16   0   -1.27   37.53
   7  16   0  -18.30   30.62
   8  16   0    0.22   34.78
   8  16   0   29.72   38.18
   7 -17   0   63.56   51.98
   6 -17   0   28.94   44.54
   5 -17   0   31.61   42.54
   4 -17   0   87.86   43.08
   3 -17   0  186.01   42.42
  -2  17   0   18.74   27.93
   2 -17   0   29.21   28.04
   1 -17   0  123.17   36.00
  -1  17   0  127.33   36.73
   0  17   0    6.42   24.87
   1  17   0  147.71   36.52
   2  17   0    9.27   28.02
   3  17   0  143.36   40.78
   4  17   0   37.34   36.08
   5  17   0  -16.72   34.43
   6  17   0  -31.14   34.41
   7  17   0    7.39   41.02
   6 -18   0  -13.98   41.44
   5 -18   0   53.50   45.22
   4 -18   0   51.18   35.70
   3 -18   0   89.04   41.35
   2 -18   0   51.92   30.68
  -2  18   0   69.93   34.55
  -1  18   0   -8.07   25.38
   0  18   0   18.18   27.91
   1  18   0   -3.95   25.46
   2  18   0   50.44   33.09
   3  18   0   55.87   34.62
   4  18   0    6.51   29.48
   5  18   0   12.42   34.30
   6  18   0  -55.25   35.95
   5 -19   0   10.75   41.24
   4 -19   0  111.75   46.44
   3 -19   0  185.06   43.51
   2 -19   0    2.88   26.49
  -1  19   0   80.11   35.93
   0  19   0  -19.48   28.02
   1  19   0   90.80   36.76
   2  19   0    7.95   31.12
   3  19   0   57.12   36.65
   4  19   0   -7.82   34.91
   5  19   0  -20.76   36.73
   4 -20   0  109.76   45.26
   3 -20   0   44.08   34.16
  -1  20   0   10.55   31.41
   0  20   0   13.99   33.80
   1  20   0   -9.55   29.85
   2  20   0   69.01   37.11
   3  20   0   -3.76   35.31
   4  20   0    9.05   38.90
   0  21   0  -16.65   33.03
   1  21   0    5.92   35.58
   2  21   0   -9.97   33.57
   3  21   0   11.42   38.82
   0  22   0   19.43   39.55
   1  22   0    0.05   35.63
   1  22  -1  -38.49   33.53
   0  22  -1  -17.20   35.83
   3  21  -1   -1.31   36.97
   2  21  -1  -17.40   34.24
   1  21  -1   -1.15   32.45
   0  21  -1  -13.43   32.71
   4  20  -1  -24.01   35.14
   3  20  -1  -41.21   31.12
   2  20  -1   16.10   34.06
   1  20  -1   41.26   34.41
   0  20  -1   17.94   31.12
   3 -20   1  108.06   41.35
   4 -20   1   30.97   37.77
   5  19  -1  -31.82   35.40
   4  19  -1  -47.50   30.76
   3  19  -1   78.39   38.80
   2  19  -1  -10.41   28.11
   1  19  -1   75.13   36.29
   0  19  -1    4.34   28.69
  -1  19  -1    7.37   28.32
   2 -19   1   -4.21   26.42
   3 -19   1   84.35   39.88
   4 -19   1  127.25   45.25
   5 -19   1   21.96   39.40
   6  18  -1    6.16   39.19
   5  18  -1  -41.41   33.15
   4  18  -1  -11.22   32.86
   3  18  -1  -12.75   29.64
   2  18  -1  222.34   38.47
   1  18  -1    6.84   26.40
   0  18  -1    0.13   25.72
  -1  18  -1    0.08   27.40
   2 -18   1  114.92   37.33
   3 -18   1   12.58   32.43
   4 -18   1   50.17   38.42
   5 -18   1   27.12   40.42
   6 -18   1   -3.33   44.53
   7  17  -1   65.80   44.52
   6  17  -1  -15.74   34.32
   5  17  -1  -11.09   32.52
   4  17  -1  -24.60   29.10
   3  17  -1  123.66   38.73
   2  17  -1   19.48   28.10
   1  17  -1   72.30   31.13
   0  17  -1   12.73   24.90
  -1  17  -1   -5.00   23.97
   1 -17   1   -2.85   21.01
   2 -17   1   52.20   31.11
  -2  17  -1   44.43   27.15
   3 -17   1  151.60   44.41
   4 -17   1  183.55   50.97
   5 -17   1   -3.14   37.92
   6 -17   1   88.94   48.74
   7 -17   1   43.07   47.28
   7  16  -1    4.66   36.80
   6  16  -1   14.58   34.56
   5  16  -1   -8.91   32.67
   4  16  -1  189.30   45.55
   3  16  -1   -3.76   26.43
   2  16  -1   62.71   30.22
   1  16  -1   84.09   30.94
   0  16  -1  146.28   32.97
   1 -16   1   51.99   27.98
  -1  16  -1   39.76   24.68
   2 -16   1   19.70   27.90
  -2  16  -1   44.93   24.10
   3 -16   1  105.71   35.36
   4 -16   1   36.72   35.16
   5 -16   1  151.51   48.94
   6 -16   1    6.82   37.97
   7 -16   1   67.59   44.76
   8  15  -1  -14.73   25.16
   7  15  -1   20.77   36.43
   7  15  -1   14.96   26.07
   6  15  -1   -0.59   31.87
   5  15  -1  115.33   40.17
   4  15  -1    7.08   25.32
   3  15  -1  165.86   33.38
   2  15  -1   11.70   25.33
   1  15  -1  250.34   35.20
   0 -15   1   17.16   20.47
   0  15  -1   40.65   23.68
  -1  15  -1  141.26   31.16
   1 -15   1  147.60   33.34
  -2  15  -1   37.40   22.08
   2 -15   1   37.02   27.40
   3 -15   1  105.20   37.68
   4 -15   1   50.20   35.47
   5 -15   1   33.43   37.09
   6 -15   1   52.93   41.29
   7 -15   1   13.59   41.32
   8 -15   1   14.60   43.25
   9  14  -1  -14.36   26.53
   8  14  -1   -1.99   30.85
   7  14  -1   25.13   32.44
   7  14  -1  -26.04   24.41
   6  14  -1   35.45   29.76
   6  14  -1   28.61   23.97
   5  14  -1   16.96   29.86
   4  14  -1  163.40   39.64
   3  14  -1  147.49   35.29
   2  14  -1  319.92   40.21
   1  14  -1   11.12   22.29
   0  14  -1  321.82   38.22
   0 -14   1  369.95   43.67
   1 -14   1   63.21   25.70
  -1  14  -1   69.04   25.54
  -2  14  -1  275.96   34.25
   2 -14   1  340.69   46.54
   3 -14   1   20.78   28.48
  -3  14  -1   24.75   20.57
   4 -14   1  122.36   40.32
   5 -14   1  156.40   40.38
   6 -14   1   64.51   38.81
   7 -14   1  130.11   49.92
   8 -14   1   15.07   42.81
  -9 -13   1  -16.89   19.53
   9  13  -1  -12.15   26.79
   8  13  -1  -14.25   22.73
   7  13  -1  -12.25   27.90
   7  13  -1  -27.08   21.84
   6  13  -1   29.61   31.88
   6  13  -1   11.80   20.71
   5  13  -1  118.56   36.01
   5  13  -1  104.22   28.90
   4  13  -1   75.82   30.25
   3  13  -1   40.36   25.56
   2  13  -1  -11.47   16.39
  -1 -13   1   -2.76   13.66
   1  13  -1    5.12   19.00
   0 -13   1   65.24   19.91
   0  13  -1   51.15   20.61
   1 -13   1  -12.14   16.94
  -1  13  -1   25.28   17.83
   2 -13   1  228.36   36.29
  -2  13  -1  209.31   28.46
   3 -13   1  -17.19   20.95
  -3  13  -1   -3.47   15.70
   4 -13   1   48.00   27.97
   5 -13   1   31.69   27.94
   6 -13   1  330.89   52.88
   7 -13   1   19.13   36.69
   8 -13   1   74.90   47.21
   9 -13   1   -4.17   42.13
  -9 -12   1  -13.94   20.98
   9  12  -1  -21.65   28.46
  -8 -12   1   40.52   21.60
   8  12  -1   60.62   29.96
   7  12  -1   -1.21   24.51
   7  12  -1  -12.82   18.29
   6  12  -1  160.47   31.20
   6  12  -1  218.32   30.19
   5  12  -1   26.79   25.92
   5  12  -1   15.74   19.64
   4  12  -1  718.30   56.75
   4  12  -1  770.16   67.86
   3  12  -1   50.59   24.97
   2  12  -1  164.77   27.36
  -1 -12   1  -11.40   11.26
   1  12  -1    3.46   17.86
   0  12  -1  690.19   59.22
   0 -12   1  738.04   68.85
  -1  12  -1  143.36   21.89
   1 -12   1  101.51   25.89
   2 -12   1  133.79   26.95
  -2  12  -1  160.96   23.11
   3 -12   1    4.36   19.72
  -3  12  -1   46.84   17.72
   4 -12   1   85.02   35.71
   5 -12   1   25.34   27.89
   6 -12   1   76.73   33.04
   7 -12   1  177.70   42.18
   8 -12   1   11.92   37.22
   9 -12   1   -4.43   40.92
  10  11  -1   -7.11   27.45
 -10 -11   1   21.24   31.79
  -9 -11   1   53.29   28.99
   9  11  -1   43.76   27.27
  -8 -11   1    0.44   21.23
   8  11  -1   -1.74   20.31
   7  11  -1   34.81   24.32
   7  11  -1   17.78   24.12
   6  11  -1   32.28   26.32
   6  11  -1   33.88   22.06
   5  11  -1  366.24   42.70
   5  11  -1  342.16   35.50
   4  11  -1    9.48   13.24
   4  11  -1   16.63   22.25
   3  11  -1  151.93   27.20
   2  11  -1   28.36   20.81
   1  11  -1  199.30   26.04
  -1 -11   1  146.31   23.61
   0 -11   1   14.58   13.05
   0  11  -1   25.98   15.46
  -1  11  -1  246.63   27.77
   1 -11   1  261.77   34.60
   2 -11   1   44.43   23.45
   3 -11   1   12.18   25.48
  -3  11  -1   53.97   18.66
   4 -11   1  157.59   34.12
   5 -11   1   72.19   32.31
   6 -11   1  160.99   35.82
   7 -11   1   20.57   28.80
   8 -11   1   11.85   31.28
   9 -11   1   -4.20   39.29
  10 -11   1   36.63   45.29
 -10 -10   1   18.47   36.13
  10  10  -1  -22.31   23.28
  -9 -10   1   35.97   28.52
   9  10  -1    7.86   22.98
  -8 -10   1    5.68   22.41
   8  10  -1    7.98   21.92
   7  10  -1   13.58   18.10
   6  10  -1    2.96   14.98
   6  10  -1   27.25   22.72
   5  10  -1  121.48   29.76
   5  10  -1  130.55   21.53
   4  10  -1  136.29   27.90
   4  10  -1  121.37   18.44
   3  10  -1   95.02   18.40
   3  10  -1  100.65   25.97
   2  10  -1    4.18   17.03
  -1 -10   1   38.55   15.47
   1  10  -1   78.48   21.52
   0 -10   1  246.47   32.88
   0  10  -1  316.21   30.69
   1 -10   1  473.59   50.42
  -1  10  -1  506.64   42.27
  -2  10  -1   -2.95   12.11
   2 -10   1   -6.62    8.55
  -3  10  -1  313.47   29.59
   3 -10   1  315.40   39.37
   3 -10   1  267.92   25.46
  -4  10  -1   64.74   18.82
   4 -10   1   15.28   21.94
   5 -10   1  158.53   37.51
   6 -10   1   28.82   28.84
   7 -10   1  156.49   38.55
   8 -10   1   -1.28   33.02
   9 -10   1   57.71   38.27
  10 -10   1   19.12   42.33
  10   9  -1   -1.97   23.99
   9   9  -1    0.10   22.01
  -9  -9   1   35.07   28.45
   8   9  -1   -6.25   15.13
  -8  -9   1   -6.29   19.79
   7   9  -1  161.89   24.95
   6   9  -1   37.53   21.45
   6   9  -1   34.16   17.37
   5   9  -1  156.94   21.88
   5   9  -1  151.44   26.38
   4   9  -1   59.46   16.50
   4   9  -1   24.64   17.57
   3   9  -1  432.39   43.22
   3   9  -1  532.09   37.47
   2   9  -1   -6.11   13.61
  -1  -9   1 1242.69   99.53
   1   9  -1 1120.29   86.11
   0   9  -1   13.37   12.97
   0  -9   1   -7.46   10.05
   1  -9   1  126.73   27.28
  -1   9  -1  159.31   20.37
   2  -9   1  534.13   53.08
  -2   9  -1  493.12   41.32
   3  -9   1  483.43   50.85
  -3   9  -1  418.27   37.24
   3  -9   1  429.07   33.46
   4  -9   1   42.67   22.52
  -4   9  -1   65.35   16.90
   6  -9   1  193.83   37.23
   7  -9   1   93.37   35.70
   8  -9   1   76.17   37.16
   9  -9   1  -21.06   32.60
  10  -9   1   65.07   45.23
  10   8  -1   15.60   25.25
   9   8  -1   -6.94   20.05
  -9  -8   1    8.12   24.67
  -8  -8   1  134.89   32.08
   8   8  -1   93.48   26.42
  -7  -8   1   22.05   17.40
   7   8  -1   -3.25   15.61
   6   8  -1  189.44   25.27
   6   8  -1  189.03   24.16
   5   8  -1    0.53   12.76
   5   8  -1   -9.56   15.34
   4   8  -1  145.79   17.81
   4   8  -1  141.95   23.42
   3   8  -1   54.52   13.06
   3   8  -1   51.32   17.55
   2   8  -1 1329.60   94.12
   2   8  -1 1207.16   78.54
  -2  -8   1 1330.87  105.19
   1   8  -1  368.02   35.11
  -1  -8   1  448.99   38.56
   0  -8   1  600.62   52.26
   0   8  -1  524.77   44.53
   1  -8   1   -9.13   12.58
  -1   8  -1   13.96    9.65
   2  -8   1  495.47   37.85
   2  -8   1  597.23   54.11
  -2   8  -1  521.74   42.02
  -3   8  -1   89.66   15.67
   4  -8   1   32.73   11.42
  -4   8  -1   30.13   13.62
   4  -8   1   -7.71   17.94
   5  -8   1   -3.81   18.84
   6  -8   1   13.27   20.33
   7  -8   1    8.63   25.16
   8  -8   1   -3.44   23.82
   9  -8   1   34.94   34.30
  10  -8   1   33.12   41.16
  10   7  -1   -0.96   20.90
   9   7  -1    2.94   21.47
  -9  -7   1   29.91   24.54
   8   7  -1  115.88   27.62
  -8  -7   1  100.29   27.00
   7   7  -1   56.84   20.81
  -7  -7   1  132.76   23.78
   6   7  -1  -11.86   13.41
   5   7  -1   86.67   18.87
   5   7  -1  109.20   21.25
   4   7  -1  185.70   24.41
   4   7  -1  251.90   22.83
   3   7  -1    3.59   14.80
   3   7  -1  -18.29    9.10
   2   7  -1  179.28   21.92
   2   7  -1  176.96   15.64
  -2  -7   1  173.71   17.90
   1   7  -1   87.25   18.13
  -1  -7   1   51.09   12.20
   0   7  -1  966.46   69.03
   0  -7   1  948.98   81.09
  -1   7  -1  232.79   21.09
   1  -7   1  169.60   25.24
   2  -7   1   61.86   15.71
   2  -7   1   98.64   12.68
  -2   7  -1   84.03   12.58
  -3   7  -1  101.20   16.22
  -4   7  -1  819.74   65.01
   4  -7   1  822.16   57.42
   4  -7   1  995.09   83.17
   5  -7   1    2.09   16.69
   5  -7   1   22.90   11.49
   6  -7   1   78.72   17.40
   6  -7   1   80.79   27.59
   7  -7   1   10.08   13.70
   7  -7   1   17.90   24.12
   8  -7   1  205.34   38.87
   9  -7   1   32.22   31.69
  11   6  -1   -2.91   22.72
  10   6  -1   -5.01   17.40
   9   6  -1   34.54   23.22
  -9  -6   1   49.14   24.26
  -8  -6   1   23.21   22.01
   8   6  -1   34.79   21.47
  -7  -6   1   70.14   21.40
   7   6  -1   44.64   19.58
   6   6  -1  215.28   25.08
   5   6  -1   27.50   14.87
   5   6  -1   35.73   15.39
   4   6  -1  554.82   40.01
   4   6  -1  504.70   43.97
   3   6  -1   68.70   13.43
   3   6  -1   59.69   16.07
   2   6  -1  793.46   48.43
   2   6  -1  719.18   56.55
   1   6  -1  985.44   70.67
   0   6  -1  204.76   19.80
  -1   6  -1   52.09   10.10
   1  -6   1   34.82    8.33
   1  -6   1   19.19    9.43
  -2   6  -1   92.81   12.11
   2  -6   1   62.24   16.49
   2  -6   1  102.47   12.08
  -3   6  -1  263.16   25.44
   3  -6   1  295.55   24.46
   3  -6   1  323.28   34.48
  -4   6  -1  173.80   21.38
   4  -6   1  172.82   28.06
   4  -6   1  192.29   18.73
  -5   6  -1  327.22   37.11
   5  -6   1  389.22   30.42
   5  -6   1  373.46   43.97
   6  -6   1   -1.00   18.96
   6  -6   1   25.74   13.09
   7  -6   1  100.33   18.41
   7  -6   1  128.19   29.31
   8  -6   1    4.21   15.38
   8  -6   1   27.17   25.37
   9  -6   1  184.21   39.53
  11   5  -1   33.21   28.81
  10   5  -1  -13.98   21.46
   9   5  -1   29.59   21.82
  -9  -5   1   37.87   21.94
  -8  -5   1   63.23   25.00
   8   5  -1  101.42   26.23
   7   5  -1  675.15   52.56
  -7  -5   1  626.20   53.76
   6   5  -1   25.20   14.26
  -6  -5   1   36.84   14.62
   5   5  -1  476.31   38.06
   4   5  -1   -7.11    7.68
   4   5  -1   -8.42    9.84
   3   5  -1 2072.15  139.80
   3   5  -1 2030.15  122.70
   2   5  -1    6.78    8.99
   2   5  -1   18.31    6.16
   1   5  -1 1938.78  125.70
   1   5  -1 1775.12  107.44
   0   5  -1  126.57   13.67
  -1   5  -1  805.99   53.80
   1  -5   1  726.02   47.96
   2  -5   1   20.93    7.21
   2  -5   1    4.96    8.22
  -2   5  -1   25.38    7.23
   3  -5   1 1260.35  107.75
   3  -5   1 1355.06   78.62
  -3   5  -1 1201.25   87.87
  -4   5  -1   32.05   15.32
   4  -5   1   32.19   11.81
   5  -5   1  163.93   18.08
   5  -5   1  136.41   23.80
  -5   5  -1  126.25   24.68
   6  -5   1    6.55   18.67
   7  -5   1  125.93   32.24
   7  -5   1  108.99   18.79
   8  -5   1   47.99   27.42
   9  -5   1   26.30   28.27
   9  -5   1    9.69   16.43
  10  -5   1   20.06   19.17
  11   4  -1    9.98   22.59
  10   4  -1    7.33   20.26
   9   4  -1    5.12   18.17
   8   4  -1   55.29   23.11
  -8  -4   1   41.23   20.27
  -7  -4   1   47.43   18.34
   7   4  -1   56.10   18.03
   6   4  -1  242.45   25.80
  -6  -4   1  189.26   23.91
   5   4  -1  -12.21   10.22
   4   4  -1   -4.94    8.66
   4   4  -1   -6.34    7.87
   3   4  -1  197.69   20.28
   3   4  -1  201.71   17.93
   2   4  -1  149.38   16.84
   2   4  -1  183.72   14.54
   1   4  -1   71.35    6.70
   1   4  -1   76.24   10.62
   0   4  -1   56.46    8.50
  -1   4  -1    5.43    4.28
   1  -4   1    3.24    4.58
   2  -4   1    8.58    5.52
   2  -4   1   -9.83    7.50
  -2   4  -1    9.01    5.68
   3  -4   1  266.47   20.48
  -3   4  -1  220.03   22.81
   3  -4   1  234.25   26.55
   4  -4   1   12.73   13.61
   4  -4   1   17.27    9.41
  -4   4  -1   19.67   17.22
   5  -4   1  559.49   40.15
  -5   4  -1  561.79   47.31
   5  -4   1  539.43   54.08
   6  -4   1    2.26    8.98
   7  -4   1  228.98   34.80
   7  -4   1  215.31   24.36
   8  -4   1   35.05   18.01
   8  -4   1   33.55   23.81
   9  -4   1  122.07   27.35
  10  -4   1   45.12   24.50
  11  -4   1   58.42   29.60
  11   3  -1  -10.48   21.30
  10   3  -1    1.60   21.74
   9   3  -1   -7.52   19.68
  -8  -3   1  109.62   25.19
   8   3  -1  120.49   26.16
  -7  -3   1   17.41   14.75
   7   3  -1   24.65   15.20
   6   3  -1    7.59   11.65
  -6  -3   1   -2.04   11.49
  -5  -3   1   24.47   11.68
   5   3  -1    9.60   14.84
   5   3  -1   38.83   13.23
   4   3  -1    4.33    7.98
   3   3  -1  189.01   18.39
   3   3  -1  198.79   17.35
   2   3  -1  239.96   16.74
   2   3  -1  182.40   17.83
   1   3  -1    3.56    5.16
   1   3  -1    7.36    2.91
   0   3  -1  677.92   46.67
  -1   3  -1   23.52    5.00
   1  -3   1   25.74    5.86
   2  -3   1   86.53    9.39
  -2   3  -1   98.04   10.61
  -3   3  -1  -16.95    9.23
   3  -3   1    4.94    6.03
  -4   3  -1 1110.94   76.30
   4  -3   1  984.09   67.50
   4  -3   1 1126.16   92.24
   5  -3   1   13.74   13.94
  -5   3  -1   21.56   12.00
   5  -3   1   38.37   12.33
  -6   3  -1  156.62   21.13
   6  -3   1  150.22   18.47
   6  -3   1  131.42   25.48
   7  -3   1   89.24   20.84
   7  -3   1   77.40   25.73
   8  -3   1  274.02   30.62
   8  -3   1  344.15   44.81
   9  -3   1   14.47   18.62
  10  -3   1   92.86   28.77
  11  -3   1    3.71   24.70
  11   2  -1    2.66   24.18
  10   2  -1   63.31   22.34
   9   2  -1   -1.54   16.37
  -8  -2   1  208.92   27.90
   8   2  -1  202.82   25.93
  -7  -2   1   26.27   14.21
   7   2  -1   26.36   15.61
  -6  -2   1  718.71   55.73
   6   2  -1  751.05   70.77
   6   2  -1  727.86   52.94
   5   2  -1    3.31    9.25
  -5  -2   1   -0.83    7.79
   5   2  -1  -14.85   11.57
  -4  -2   1 1968.48  132.22
   4   2  -1 1932.49  162.04
   4   2  -1 2023.93  119.10
   3   2  -1   15.65    9.53
   3   2  -1   19.93    7.38
  -3  -2   1   35.93    8.03
   2   2  -1  215.07   17.30
   2   2  -1  264.65   19.33
   1   2  -1  419.70   25.87
   1  -2   1    2.02    2.91
   2  -2   1   41.62    6.41
  -3   2  -1  560.60   39.13
   3  -2   1  533.09   36.95
   3  -2   1  549.41   48.50
   4  -2   1  213.55   25.45
   4  -2   1  226.13   20.65
  -4   2  -1  229.58   19.54
  -5   2  -1    7.86    8.48
   5  -2   1    6.08    8.08
   6  -2   1  139.33   18.44
  -6   2  -1  150.34   20.27
   6  -2   1  144.15   25.08
   7  -2   1    6.16   19.48
   8  -2   1   22.94   20.52
   8  -2   1   24.94   18.39
   9  -2   1   45.64   20.99
  10  -2   1   10.40   22.67
  11  -2   1   23.31   21.80
  11   1  -1   -5.50   23.22
  10   1  -1   38.54   21.71
   9   1  -1   34.55   18.22
   8   1  -1    4.96   14.59
   7   1  -1  100.68   17.65
  -7  -1   1  113.34   18.84
   6   1  -1   50.97   21.97
  -6  -1   1   61.75   16.01
   6   1  -1   88.01   17.33
   5   1  -1  639.70   45.55
   5   1  -1  694.20   61.58
  -5  -1   1  620.58   48.21
   4   1  -1   74.17   11.52
   4   1  -1   64.74   17.00
  -4  -1   1   63.28   12.55
   3   1  -1 1094.80   66.73
   3   1  -1 1076.03   90.35
   2   1  -1  575.28   52.61
  -2  -1   1  603.42   42.68
   2   1  -1  682.43   39.21
   1   1  -1 1106.02   64.42
   1  -1   1 1484.42   86.68
   2  -1   1  794.34   49.42
   3  -1   1   67.13   10.48
  -3   1  -1   47.49    6.77
   3  -1   1   50.28    9.26
   4  -1   1   48.92   11.57
  -4   1  -1   59.37    8.57
   4  -1   1   41.94   13.06
   5  -1   1   62.59   14.19
   5  -1   1   53.18   15.75
  -5   1  -1   51.18   10.41
   6  -1   1  194.57   28.60
   6  -1   1  241.86   24.58
  -6   1  -1  239.95   23.80
   7  -1   1   14.19   12.84
   7  -1   1   17.37   16.84
   8  -1   1   29.16   17.54
   9  -1   1    9.13   15.10
  10  -1   1   26.51   23.52
  11  -1   1   13.88   22.90
  11   0  -1   89.84   29.78
  10   0  -1   17.98   21.67
   9   0  -1   58.44   21.32
   8   0  -1   -1.28   16.41
   7   0  -1  113.24   18.41
  -7   0   1  132.43   20.37
   7   0  -1  132.72   32.27
  -6   0   1   -8.39    9.94
   6   0  -1   -2.86    9.85
   5   0  -1  173.61   24.24
  -5   0   1  188.17   19.39
   5   0  -1  179.79   18.75
  -4   0   1   -3.29    7.05
   4   0  -1   -7.23    7.73
   3   0  -1 1001.05   83.97
  -3   0   1 1005.82   68.36
   2   0  -1   22.47    5.31
   2   0  -1   18.51    6.90
  -2   0   1   33.46    5.30
   1   0   1 4776.65  272.91
   2   0   1    0.60    4.46
   3   0   1 1182.95   71.64
   3   0   1 1122.47   94.02
  -3   0  -1 1153.79   76.97
   4   0   1   -4.95    6.14
  -4   0  -1    3.60    5.77
  -5   0  -1  399.82   31.43
   5   0   1  346.02   31.06
   5   0   1  442.24   39.28
   6   0   1   -4.77   10.34
   6   0   1  -14.48   12.13
  -6   0  -1   -6.88    9.40
   7   0   1  254.08   27.65
   7   0   1  259.93   34.82
  -7   0  -1  286.13   28.98
   8   0   1  -11.53   15.40
   9   0   1  122.09   27.33
  10   0   1   -4.30   19.05
  11   0   1  104.70   29.79
  11  -1  -1   10.49   24.13
  10  -1  -1   73.41   26.11
   9  -1  -1   69.95   24.27
   8  -1  -1   16.64   15.03
  -7   1   1  106.95   19.80
   7  -1  -1   91.10   16.35
   7  -1  -1   98.33   25.76
   6  -1  -1   80.39   17.51
  -6   1   1   54.32   16.53
   6  -1  -1   65.05   23.19
   5  -1  -1  672.93   59.41
  -5   1   1  642.73   47.25
   5  -1  -1  556.29   42.63
   4  -1  -1   62.93   10.44
   4  -1  -1   60.91   16.11
  -4   1   1   55.32   11.04
   3  -1  -1 1170.04   68.69
  -3   1   1 1118.51   76.57
   3  -1  -1 1099.91   93.82
  -2   1   1  597.98   39.13
   2  -1  -1  534.76   34.49
   2  -1  -1  540.49   47.76
   1  -1  -1  963.96   78.64
   1   1   1 3757.34  214.99
   3   1   1   75.92    9.28
   3   1   1   64.10   12.15
   3   1   1   53.69    8.18
   4   1   1   48.70   11.79
  -4  -1  -1   48.21   10.26
   4   1   1   59.25   12.54
   5   1   1   84.56   17.67
  -5  -1  -1   52.03   11.42
   5   1   1   63.88   14.02
   6   1   1  241.43   25.13
   6   1   1  171.67   26.10
  -6  -1  -1  186.53   21.18
  -7  -1  -1    8.53   14.28
   7   1   1   18.34   16.54
   8   1   1    6.74   13.93
   9   1   1   -0.98   14.97
  10   1   1   14.62   24.39
  11   1   1   42.53   28.35
  11  -2  -1    8.78   23.04
  10  -2  -1  106.66   28.07
   9  -2  -1   27.87   19.59
   8  -2  -1  197.48   25.49
   8  -2  -1  219.58   36.04
  -7   2   1   29.37   18.26
   7  -2  -1   35.14   23.51
   7  -2  -1   42.98   16.31
   6  -2  -1  656.89   64.94
   6  -2  -1  661.47   47.81
  -6   2   1  704.73   53.88
  -5   2   1  -14.06    8.98
   5  -2  -1    6.28    8.19
   5  -2  -1   -8.58   10.76
  -4   2   1 1806.31  121.57
   4  -2  -1 1823.09  148.53
   4  -2  -1 1763.50  107.42
  -3   2   1   19.52    8.51
   3  -2  -1   32.59    7.49
   3  -2  -1   11.59    9.52
  -2   2   1  252.57   20.98
   2  -2  -1  235.08   23.36
   2  -2  -1  224.58   16.30
  -1   2   1  280.35   22.63
   0   2   1 3067.01  200.57
   1   2   1    5.56    2.95
   1   2   1    7.27    4.05
   2   2   1   63.41    8.55
   2   2   1   79.85    8.98
   3   2   1  665.92   47.32
   4   2   1  266.08   23.41
   4   2   1  280.89   26.17
   5   2   1    6.43   10.78
   6   2   1  119.74   19.47
   6   2   1  174.19   23.64
  -6  -2  -1  134.61   18.07
   7   2   1    3.04   16.87
  -7  -2  -1   14.10   13.89
   8   2   1    7.48   14.57
   9   2   1   39.01   22.28
  10   2   1   14.19   22.05
  11   2   1   17.68   26.07
  11  -3  -1    1.59   21.03
  10  -3  -1   34.56   22.37
   9  -3  -1   20.87   19.55
   8  -3  -1  136.31   35.41
   8  -3  -1   97.61   21.36
   7  -3  -1   24.56   22.50
   7  -3  -1   23.29   13.50
   6  -3  -1    9.21   15.92
  -6   3   1    4.11   16.73
   6  -3  -1   13.74   10.64
   5  -3  -1   18.29   15.97
   5  -3  -1   35.52   12.02
  -5   3   1   49.73   15.03
  -4   3   1   -3.96   11.07
   4  -3  -1    0.42    5.76
   3  -3  -1  119.99   18.50
  -3   3   1  155.40   17.76
   3  -3  -1  139.01   12.68
   2  -3  -1  169.04   12.56
  -2   3   1  163.60   18.85
   2  -3  -1  167.95   18.74
  -1   3   1    7.37    5.12
   1  -3  -1    0.02    3.83
   0   3   1  534.03   37.68
   0  -3  -1  529.42   44.58
   1   3   1   36.92    6.90
   1   3   1   30.40    4.68
   2   3   1  175.63   17.28
   2   3   1  214.48   16.74
   3   3   1  -10.52    5.85
   3   3   1   -3.83    6.18
   4   3   1 1598.17   99.70
   4   3   1 1600.94  129.50
   5   3   1   19.64   13.19
   5   3   1   12.80    9.92
  -6  -3  -1  143.94   18.56
   6   3   1  143.04   20.63
  -7  -3  -1   94.49   20.45
   7   3   1   57.18   20.93
   8   3   1  226.41   28.97
   9   3   1   -0.94   19.14
  10   3   1   38.32   21.77
  11   3   1   -0.98   22.40
  10  -4  -1   -6.53   16.75
   9  -4  -1   30.79   19.26
   8  -4  -1   56.07   17.90
   8  -4  -1   95.34   32.22
   7  -4  -1   73.79   17.89
   7  -4  -1  100.00   28.15
   6  -4  -1  185.67   19.45
  -6   4   1  179.92   27.16
   6  -4  -1  192.38   30.65
  -5   4   1    0.18   13.85
   5  -4  -1    4.58    7.61
   4  -4  -1  -14.38   10.14
  -4   4   1   -6.69   12.57
   4  -4  -1   -0.12    6.24
   3  -4  -1  133.60   20.09
  -3   4   1  135.52   20.11
   3  -4  -1  153.21   13.05
  -2   4   1   74.82   12.98
   2  -4  -1  112.62    9.17
   2  -4  -1   91.94   13.48
  -1   4   1   58.26    9.05
   1  -4  -1   65.92   10.39
   0   4   1   58.24    8.79
   0  -4  -1   41.57    8.05
   1   4   1    3.08    3.67
  -1  -4  -1    1.01    3.86
   1   4   1    3.38    5.93
   2   4   1    4.38    6.87
   2   4   1    2.77    6.08
   3   4   1  385.05   28.89
   3   4   1  353.01   30.64
   4   4   1   29.21   11.27
   4   4   1   18.50   11.82
   6   4   1   -9.12   12.43
   7   4   1  300.77   32.73
  -7  -4  -1  249.30   28.69
  -8  -4  -1    1.61   18.48
   8   4   1  -11.16   18.57
   9   4   1   83.68   28.97
  10   4   1   13.80   23.25
  11   4   1   30.17   29.45
   9  -5  -1   84.41   34.82
   9  -5  -1   36.22   19.61
   8  -5  -1  170.11   36.25
   7  -5  -1  608.16   64.33
   7  -5  -1  579.15   44.47
  -6   5   1    2.79   20.94
   6  -5  -1   35.64   12.87
   6  -5  -1   30.59   20.40
  -5   5   1  296.82   36.18
   5  -5  -1  294.89   25.07
   5  -5  -1  354.22   38.82
  -4   5   1   11.38   15.30
   4  -5  -1    4.61    7.15
   3  -5  -1 1410.52   79.36
   3  -5  -1 1296.28  112.01
  -3   5   1 1274.16   97.08
  -2   5   1   16.25    9.95
   2  -5  -1   13.48    4.81
   2  -5  -1   -3.31    7.74
   0   5   1  117.69   13.30
   0  -5  -1   87.18   12.16
  -1  -5  -1  936.37   80.40
   1   5   1  996.62   69.62
   1   5   1 1014.15   59.23
   2   5   1   23.81    7.33
   2   5   1   21.99    9.93
   3   5   1 2004.37  116.57
   3   5   1 1828.26  130.68
   4   5   1   -0.96   11.62
   4   5   1   15.51   13.11
   5   5   1  225.01   24.19
   5   5   1  219.57   24.37
   6   5   1   37.18   15.14
   6   5   1   22.99   18.05
   7   5   1   87.11   25.23
  -7  -5  -1  108.41   22.50
   8   5   1   12.66   22.12
  -8  -5  -1   24.99   22.07
   9   5   1    9.15   24.19
  10   5   1   -1.07   22.71
  11   5   1    5.21   23.42
   9  -6  -1  117.00   39.21
   8  -6  -1   50.96   28.61
   7  -6  -1   77.38   17.91
   7  -6  -1   69.05   26.83
   6  -6  -1  202.83   20.71
   6  -6  -1  180.45   32.16
  -5   6   1   11.24   17.99
   5  -6  -1    0.84   15.14
   4  -6  -1  352.73   25.29
  -4   6   1  286.18   35.61
   4  -6  -1  362.55   39.74
  -3   6   1   50.38   17.11
   3  -6  -1   58.18    9.56
   3  -6  -1   31.52   14.23
   2  -6  -1  546.43   34.57
  -2   6   1  517.97   42.71
   2  -6  -1  563.40   50.91
  -1   6   1  724.28   52.75
   1  -6  -1  735.71   44.34
   1  -6  -1  689.63   62.07
   0  -6  -1  163.33   19.33
   0   6   1  199.05   19.01
   1   6   1   37.71    7.16
  -1  -6  -1   37.00    8.55
   1   6   1   43.36   10.76
   2   6   1  156.61   19.17
   2   6   1  128.68   13.72
  -2  -6  -1  122.78   15.38
   3   6   1  412.70   37.11
   3   6   1  436.77   32.73
   4   6   1  292.18   26.69
   4   6   1  270.39   28.53
   5   6   1  439.25   38.94
   5   6   1  429.27   37.05
   6   6   1  -15.46   15.69
   6   6   1   15.16   14.82
   7   6   1  125.80   29.77
  -8  -6  -1   13.15   21.55
   8   6   1  -15.77   17.53
   9   6   1  154.54   36.25
  10   6   1  -15.36   25.75
  11   6   1   -7.97   28.39
  10  -7  -1   13.85   36.28
   9  -7  -1   92.85   37.43
   8  -7  -1  140.00   38.56
   7  -7  -1  211.66   37.42
   6  -7  -1    1.95   18.38
   6  -7  -1   19.42   10.67
  -5   7   1   81.26   25.73
   5  -7  -1  101.37   13.60
   5  -7  -1   58.24   21.84
   4  -7  -1  180.53   16.12
  -4   7   1  194.10   27.82
   4  -7  -1  138.99   26.42
  -3   7   1   29.22   14.05
   3  -7  -1   -4.26    7.88
   2  -7  -1  112.56   11.47
   2  -7  -1  120.67   19.19
  -2   7   1  148.56   18.17
   1  -7  -1   26.65   15.78
  -1   7   1   76.62   13.32
   0   7   1  931.87   65.73
   0  -7  -1  859.21   76.05
   1   7   1  252.61   17.99
  -1  -7  -1  230.01   25.19
   1   7   1  237.16   23.86
   2   7   1  105.18   18.47
   2   7   1  109.52   13.08
  -2  -7  -1  133.79   14.56
   3   7   1   94.42   15.73
   3   7   1  101.48   17.94
   4   7   1 1341.71   96.84
   4   7   1 1311.60   85.98
   5   7   1   24.43   16.42
   5   7   1   10.34   15.51
   6   7   1   82.17   22.57
   6   7   1   97.05   24.95
   7   7   1  -15.55   16.46
   8   7   1  157.33   28.69
  -8  -7  -1  240.52   32.34
   9   7   1  -27.02   23.18
  -9  -7  -1   -9.25   22.40
  10   7   1   79.68   35.25
  10  -8  -1   75.70   44.82
   9  -8  -1   48.88   35.73
   8  -8  -1  145.02   42.10
   7  -8  -1   23.74   26.21
   6  -8  -1  224.44   37.44
   5  -8  -1  -14.16   14.04
  -5   8   1   19.33   21.23
  -4   8   1  132.90   23.43
   4  -8  -1  116.75   24.47
   4  -8  -1  153.72   15.03
  -3   8   1   55.49   17.12
   2  -8  -1 1007.26   89.04
  -2   8   1 1013.42   74.15
  -1   8   1  345.52   31.20
   1  -8  -1  334.57   36.09
   0   8   1  560.98   43.68
   0  -8  -1  504.30   49.30
   1   8   1   24.62   12.33
   1   8   1   15.85    6.32
  -1  -8  -1    8.78    9.42
   2   8   1  724.67   58.05
   2   8   1  728.57   48.22
   3   8   1   84.65   16.50
   3   8   1   98.45   18.76
   4   8   1   37.40   18.51
   4   8   1   32.57   15.23
   5   8   1   -4.90   16.90
   5   8   1    9.66   13.78
   6   8   1   24.36   19.20
   6   8   1   22.19   20.00
   7   8   1   -1.25   17.99
   7   8   1   -8.63   17.18
  -8  -8  -1   15.27   21.51
   8   8   1  -29.62   20.79
   9   8   1  -18.18   23.11
  -9  -8  -1   29.77   26.42
  10   8   1  -24.59   27.07
  10  -9  -1   49.40   42.83
   9  -9  -1   49.41   40.12
   8  -9  -1   20.95   31.41
   7  -9  -1  224.83   41.60
   6  -9  -1   22.30   22.11
   5  -9  -1  200.67   35.09
  -5   9   1  175.32   30.37
   4  -9  -1   36.54   22.40
  -4   9   1   53.21   22.21
   3  -9  -1  437.09   49.64
  -3   9   1  443.88   40.57
   2  -9  -1   -2.05    6.55
  -2   9   1   20.53   13.82
  -1   9   1 1106.31   76.32
   1  -9  -1  945.70   89.49
   0   9   1   33.99   14.65
   1   9   1  196.12   23.46
   2   9   1  612.23   51.39
   2   9   1  579.48   41.13
   3   9   1  591.80   44.43
   3   9   1  618.83   53.08
   4   9   1   69.20   18.67
   4   9   1   63.47   23.37
   5   9   1   -2.10   18.57
   5   9   1  -16.09   14.36
   6   9   1  236.85   30.25
   6   9   1  225.90   31.09
   7   9   1   96.10   26.66
   7   9   1   82.60   28.70
   8   9   1    7.06   21.68
  -9  -9  -1    2.41   25.68
   9   9   1  -33.31   20.85
  10   9   1  -12.21   31.11
  10 -10  -1   47.64   44.18
   9 -10  -1   50.05   42.70
   8 -10  -1   23.30   35.04
   7 -10  -1    7.95   29.53
   6 -10  -1   21.05   26.28
   5 -10  -1   93.06   28.38
   4 -10  -1  163.31   32.97
  -4  10   1  156.85   25.79
  -3  10   1   92.69   22.22
   3 -10  -1   72.62   24.86
  -2  10   1    7.05   11.47
   1 -10  -1   25.23   18.90
  -1  10   1   70.41   18.74
   1  10   1  529.49   46.41
  -1 -10  -1  520.30   50.04
   2  10   1    2.84   13.38
   2  10   1   -4.00    7.92
   3  10   1  450.62   44.30
   3  10   1  437.43   36.10
   4  10   1   63.36   22.47
   4  10   1   48.87   17.80
   5  10   1  124.40   20.34
   5  10   1  141.20   27.74
   6  10   1   18.78   21.05
   6  10   1   19.78   23.32
   7  10   1  142.99   30.92
   7  10   1  163.01   28.94
   8  10   1  -25.26   22.95
   9  10   1   17.90   24.57
  -9 -10  -1   62.63   35.08
  10  10   1  -19.61   30.83
  10 -11  -1   34.53   44.63
   9 -11  -1   85.42   47.75
   8 -11  -1   -7.31   33.96
   7 -11  -1   49.85   31.90
   6 -11  -1   58.56   32.68
   5 -11  -1  370.32   50.94
  -4  11   1   51.39   21.84
   4 -11  -1    3.14   22.72
  -3  11   1  148.71   24.15
   3 -11  -1  114.72   29.71
  -2  11   1   39.40   17.19
   2 -11  -1  -20.37   19.35
  -1  11   1  166.69   22.18
   1 -11  -1  104.83   25.36
   0 -11  -1   26.52   14.46
   0  11   1   17.88   15.78
   1  11   1  270.94   31.31
  -1 -11  -1  251.49   31.03
   2  11   1  140.35   25.54
   3  11   1   52.15   17.13
   3  11   1   55.99   23.75
   4  11   1  158.48   22.28
   4  11   1  182.27   30.61
   5  11   1   74.20   28.63
   5  11   1   47.02   18.41
   6  11   1  147.66   34.06
   6  11   1   73.07   27.34
   7  11   1    3.56   23.84
   7  11   1   -9.68   18.05
   8  11   1   11.09   25.24
   8  11   1  -11.77   20.96
   9  11   1  -27.37   27.73
  -9 -11  -1   -6.17   24.14
  10  11   1  -25.64   29.92
   9 -12  -1   19.17   41.25
   8 -12  -1   99.06   45.83
   7 -12  -1   35.11   35.92
   6 -12  -1  253.46   46.20
   5 -12  -1   46.65   29.40
   4 -12  -1  662.13   71.03
  -4  12   1  646.28   59.38
  -3  12   1   72.86   25.03
   3 -12  -1   25.73   25.75
   2 -12  -1  123.35   25.57
  -2  12   1  128.17   22.39
  -1  12   1   33.01   17.00
   1 -12  -1   -7.67   15.43
   0  12   1  661.09   57.53
   0 -12  -1  703.05   66.97
  -1 -12  -1   89.01   20.50
   1  12   1  136.74   23.92
   2  12   1  176.70   28.41
   3  12   1    4.76   15.13
   3  12   1   36.46   21.07
   4  12   1  170.49   36.00
   4  12   1  127.52   27.16
   5  12   1    7.06   20.11
   5  12   1    7.40   26.71
   6  12   1   84.67   27.18
   6  12   1  104.06   32.68
   7  12   1  113.64   35.72
   7  12   1   63.76   26.49
   8  12   1    7.22   26.71
   8  12   1  -39.28   22.24
   9  12   1  -30.50   25.54
  -9 -12  -1    5.06   22.71
   9 -13  -1   13.84   44.38
   8 -13  -1   -4.64   38.54
   7 -13  -1    0.65   36.78
   6 -13  -1   93.39   39.56
   5 -13  -1  218.78   43.61
   4 -13  -1   71.41   32.68
   3 -13  -1    5.17   23.44
  -3  13   1   25.76   22.09
  -2  13   1    3.51   17.60
   2 -13  -1   -6.10   20.39
  -1  13   1   25.07   19.40
   1 -13  -1    2.17   17.73
   0  13   1   53.57   20.82
   0 -13  -1   54.78   19.65
   1  13   1   11.95   15.96
   2  13   1  231.43   32.90
   3  13   1   -3.79   22.65
   4  13   1   45.81   22.88
   4  13   1   33.11   25.07
   5  13   1   39.68   21.11
   5  13   1   23.52   29.47
   6  13   1  287.55   35.85
   6  13   1  313.29   44.68
   7  13   1   -1.14   24.61
   7  13   1   13.61   29.06
   8  13   1   37.71   31.31
   8  13   1   21.58   30.81
  -9 -13  -1    9.19   19.25
   9  13   1  -34.47   30.90
   8 -14  -1   88.32   50.19
   7 -14  -1   17.21   35.32
   6 -14  -1  104.56   39.83
   5 -14  -1   45.68   35.08
   4 -14  -1  262.77   46.98
  -3  14   1  140.62   31.18
   3 -14  -1  128.16   39.06
  -2  14   1  337.85   40.01
   2 -14  -1  381.70   50.15
   1 -14  -1   19.00   22.43
  -1  14   1   34.49   23.73
   0  14   1  401.27   42.97
   0 -14  -1  384.59   47.08
   1  14   1   74.37   27.88
   2  14   1  319.23   40.33
   3  14   1   -2.88   25.99
   4  14   1  147.30   32.95
   4  14   1   98.42   35.12
   5  14   1  114.62   39.29
   5  14   1  116.01   32.34
   6  14   1   -5.50   20.21
   6  14   1   12.99   32.73
   7  14   1   64.25   32.10
   7  14   1  112.55   42.27
   8  14   1    6.74   34.04
   8  14   1  -23.58   22.24
   9  14   1  -18.11   26.39
   8 -15  -1   37.79   43.71
   7 -15  -1   47.69   41.95
   6 -15  -1   25.96   35.42
   5 -15  -1  208.18   53.35
   4 -15  -1    7.23   32.35
   3 -15  -1  203.72   40.92
  -3  15   1  156.00   29.38
   2 -15  -1    2.67   25.56
  -2  15   1   26.66   22.25
   1 -15  -1  302.48   43.10
  -1  15   1  306.33   38.52
   0  15   1   49.76   25.47
   0 -15  -1  -15.44   16.72
   1  15   1  169.69   36.06
   2  15   1   31.77   27.41
   3  15   1   78.97   30.41
   4  15   1   18.12   29.33
   5  15   1   31.26   28.53
   5  15   1   39.16   34.64
   6  15   1    7.33   34.59
   6  15   1  -12.81   27.78
   7  15   1  -22.68   27.85
   7  15   1   -8.21   35.55
   8  15   1  -19.30   33.71
   8  15   1  -28.00   26.47
   7 -16  -1   -6.39   36.42
   6 -16  -1   31.18   42.86
   5 -16  -1    9.76   31.52
   4 -16  -1  182.38   41.19
  -3  16   1   15.80   26.64
   3 -16  -1    7.13   31.28
  -2  16   1   66.24   28.76
  -1  16   1   92.31   30.76
   1 -16  -1   91.62   32.05
   0  16   1  132.11   34.64
   1  16   1   41.64   28.42
   2  16   1   33.20   28.09
   3  16   1   91.71   34.50
   4  16   1    0.41   31.36
   5  16   1   75.24   39.15
   6  16   1  -14.74   36.23
   7  16   1   -1.48   39.78
   8  16   1  -58.22   30.45
   8  16   1  -11.71   39.70
   7 -17  -1  138.59   53.88
   6 -17  -1   24.17   44.51
   5 -17  -1   56.85   43.93
   4 -17  -1   22.06   36.61
   3 -17  -1  177.58   42.03
   2 -17  -1   14.43   28.03
  -2  17   1   10.52   26.53
   1 -17  -1   96.24   31.24
  -1  17   1   74.58   30.85
   0  17   1   10.71   26.30
   1  17   1  -12.03   23.81
   2  17   1   23.79   29.22
   3  17   1  120.60   39.24
   4  17   1  112.12   38.09
   5  17   1  -25.94   34.40
   6  17   1   -2.06   37.53
   7  17   1  -20.71   40.09
   6 -18  -1   42.96   51.89
   5 -18  -1   17.32   43.59
   4 -18  -1   75.87   41.96
   3 -18  -1   10.99   33.14
  -2  18   1  240.29   41.77
   2 -18  -1  286.95   45.77
  -1  18   1   19.86   28.21
   0  18   1  -11.98   25.21
   1  18   1  -14.27   26.71
   2  18   1   55.08   33.90
   3  18   1   22.83   32.90
   4  18   1   15.35   35.26
   5  18   1  -30.18   33.69
   6  18   1  -44.37   36.42
   5 -19  -1   58.25   45.49
   4 -19  -1   40.04   40.48
   3 -19  -1  181.46   44.12
  -1  19   1   79.73   36.80
   0  19   1   -3.73   30.20
   1  19   1    2.59   29.31
   2  19   1   -1.44   31.06
   3  19   1   68.26   38.50
   4  19   1   31.44   39.54
   5  19   1  -42.12   36.63
   4 -20  -1   49.64   40.19
   3 -20  -1   43.89   38.42
  -1  20   1   24.24   34.80
   0  20   1   -4.38   30.87
   1  20   1    3.40   33.80
   2  20   1   12.51   35.07
   3  20   1   88.37   41.25
   4  20   1  -13.26   37.31
  -1  21   1    6.36   35.03
   0  21   1   -5.16   34.75
   1  21   1   32.87   39.79
   2  21   1   -5.41   34.59
   3  21   1   -2.23   37.53
   0  22   1  -13.60   39.74
   1  22   1  -35.84   35.26
   1  22  -2   -4.42   34.94
   3  21  -2  -10.44   34.49
   2  21  -2  -15.50   32.99
   1  21  -2   34.51   36.43
   0  21  -2   12.31   33.55
   4  20  -2  -17.51   35.08
   3  20  -2  -27.38   30.87
   2  20  -2   49.19   35.60
   1  20  -2    1.73   30.54
   0  20  -2  -10.86   28.64
   3 -20   2   15.44   30.69
   4 -20   2   40.67   36.87
   5  19  -2    5.44   35.34
   4  19  -2  -36.65   32.86
   3  19  -2   36.31   33.39
   2  19  -2   11.19   29.75
   1  19  -2   62.49   32.29
   0  19  -2   59.97   32.31
  -1  19  -2  -23.10   28.05
   2 -19   2   -2.96   26.27
   3 -19   2   55.74   35.34
   4 -19   2  167.16   48.65
   5 -19   2   10.24   37.85
   6  18  -2   11.77   39.07
   5  18  -2   -0.58   36.67
   4  18  -2  -45.68   27.81
   3  18  -2  -40.07   27.10
   2  18  -2   43.31   31.26
   1  18  -2  156.76   38.39
   0  18  -2   21.35   25.85
  -1  18  -2   22.39   26.39
   2 -18   2   -3.21   25.51
   3 -18   2   75.78   38.33
   4 -18   2   18.40   34.38
   5 -18   2  158.09   51.32
   6 -18   2   -2.17   40.65
   7  17  -2   67.73   42.89
   6  17  -2   28.58   36.51
   5  17  -2   25.06   34.53
   4  17  -2  -20.32   30.12
   3  17  -2  105.96   38.09
   2  17  -2   -9.12   23.59
   1  17  -2   66.08   29.75
   0  17  -2   71.09   29.29
  -1  17  -2  -21.17   20.09
   1 -17   2    0.71   20.98
   2 -17   2  -16.86   23.27
   3 -17   2    0.81   29.98
   4 -17   2   94.97   42.59
   5 -17   2  -12.54   29.75
   6 -17   2   34.99   41.85
   7 -17   2   -5.55   41.60
   7  16  -2    9.95   36.30
   6  16  -2   94.55   37.77
   5  16  -2   10.12   31.45
   4  16  -2   40.84   32.28
   3  16  -2   33.41   26.74
   2  16  -2  171.47   32.14
   1  16  -2   31.05   25.39
   0  16  -2   23.21   23.36
  -1  16  -2   55.75   24.77
   1 -16   2  108.84   29.79
   2 -16   2  -24.15   20.70
  -2  16  -2   -4.93   19.63
   3 -16   2   76.67   35.60
   4 -16   2   -9.04   29.32
   5 -16   2   65.78   40.75
   6 -16   2   11.03   39.52
   7 -16   2   72.62   47.84
   8  15  -2  -20.11   23.90
  -8 -15   2   -0.68   13.39
   7  15  -2   24.36   36.34
   6  15  -2   -8.06   31.00
   5  15  -2  -25.12   27.10
   4  15  -2   61.65   33.34
   3  15  -2   49.55   30.66
   2  15  -2  145.05   35.03
   1  15  -2   53.17   26.69
   0 -15   2  257.21   34.71
   0  15  -2  238.89   32.90
   1 -15   2   30.31   23.60
  -1  15  -2   64.90   23.81
  -2  15  -2  226.74   32.37
   2 -15   2  257.01   38.31
   3 -15   2   40.59   30.28
   4 -15   2  164.54   41.74
   5 -15   2    8.50   32.70
   6 -15   2  183.27   48.97
   7 -15   2   39.69   41.94
   8 -15   2   39.39   44.40
   9  14  -2  -32.24   23.14
   8  14  -2   41.74   31.93
  -8 -14   2   59.31   18.82
   7  14  -2  -29.66   24.33
   7  14  -2   16.66   30.91
   6  14  -2   40.37   33.72
   5  14  -2   21.68   25.56
   4  14  -2  401.47   49.13
   3  14  -2   69.05   30.01
   2  14  -2   21.18   21.94
   1  14  -2   42.87   24.26
   0  14  -2  159.37   32.67
   0 -14   2  119.31   30.83
   1 -14   2  195.55   33.30
  -1  14  -2  186.90   27.29
   2 -14   2  -13.10   22.90
  -2  14  -2   24.32   21.20
   3 -14   2  167.32   34.39
   4 -14   2   25.78   31.40
   5 -14   2  104.47   39.84
   6 -14   2   37.14   35.74
   7 -14   2   70.06   39.27
   8 -14   2   41.32   42.27
   9  13  -2   31.78   29.22
  -9 -13   2   46.94   24.79
  -8 -13   2    5.36   17.71
   8  13  -2  -22.38   20.30
   7  13  -2   54.57   33.14
   7  13  -2   24.22   22.56
   6  13  -2    7.02   27.40
   6  13  -2  -22.67   18.30
   5  13  -2  188.86   35.02
   4  13  -2   31.85   26.61
   3  13  -2  101.17   30.42
   2  13  -2   25.53   21.20
   1  13  -2   -9.97   17.49
  -1 -13   2    5.46   13.98
   0  13  -2   -8.35   16.53
   0 -13   2  -11.59   12.69
  -1  13  -2   29.87   19.67
   1 -13   2   16.05   19.05
  -2  13  -2   23.44   18.28
   2 -13   2   15.52   22.09
   3 -13   2  -13.61   17.63
   4 -13   2    2.00   25.37
   5 -13   2   -4.55   23.67
   6 -13   2  105.25   39.73
   7 -13   2   42.58   34.05
   8 -13   2   30.37   36.21
   9 -13   2   25.88   39.48
   9  12  -2  -28.87   25.74
  -9 -12   2    7.44   23.04
   8  12  -2   46.23   27.00
  -8 -12   2   51.98   23.78
   7  12  -2   -3.50   21.67
   6  12  -2   44.73   22.24
   6  12  -2   92.36   32.84
   5  12  -2   -7.04   16.36
   5  12  -2   13.44   25.92
   4  12  -2  165.86   29.33
   3  12  -2  395.10   43.64
   2  12  -2    2.87   18.48
   1  12  -2   -6.66   16.21
  -1 -12   2   -8.09   11.28
   0  12  -2   68.62   23.00
  -1  12  -2  255.47   29.03
   1 -12   2  263.27   35.62
   2 -12   2  -14.63   17.32
  -2  12  -2   -1.78   14.40
  -3  12  -2  307.96   33.85
   3 -12   2  421.10   49.61
   5 -12   2  165.70   42.25
   6 -12   2   25.91   27.23
   7 -12   2  268.40   46.20
   8 -12   2   27.98   33.07
   9 -12   2   19.54   44.44
 -10 -11   2    6.51   30.68
  10  11  -2  -14.55   24.38
   9  11  -2   24.26   30.49
  -9 -11   2   29.38   27.27
   8  11  -2  -13.37   23.13
  -8 -11   2    0.64   21.91
   7  11  -2   74.18   23.53
   6  11  -2  -18.89   18.23
   6  11  -2   -6.38   23.54
   5  11  -2   85.11   22.71
   5  11  -2   78.43   29.05
   4  11  -2  183.07   30.12
   4  11  -2  168.95   22.84
   3  11  -2  151.24   27.45
   2  11  -2  254.63   32.07
   1  11  -2  123.55   21.76
  -1 -11   2   89.96   19.33
   0  11  -2   38.66   16.77
   0 -11   2   32.57   15.46
  -1  11  -2   11.78   13.87
  -2  11  -2  712.19   56.18
   3 -11   2   41.52   25.88
  -3  11  -2   47.68   16.21
   4 -11   2   48.12   27.35
   5 -11   2   -8.98   20.01
   6 -11   2  238.99   41.22
   7 -11   2   51.63   30.55
   8 -11   2   83.84   42.78
   9 -11   2   11.69   38.69
  10 -11   2   32.90   46.66
 -10 -10   2   30.64   31.60
  10  10  -2   34.97   27.38
  -9 -10   2  -16.09   23.83
   9  10  -2  -19.40   23.80
  -8 -10   2  137.91   28.19
   8  10  -2  120.82   28.47
   7  10  -2    1.74   20.00
  -7 -10   2    3.82   13.86
   6  10  -2  170.31   29.03
   6  10  -2  172.10   24.33
   5  10  -2    3.47   20.71
   5  10  -2    8.80   13.78
   4  10  -2  388.84   42.26
   4  10  -2  422.06   35.68
   3  10  -2   74.68   21.51
   2  10  -2  166.60   24.89
  -2 -10   2  143.53   18.98
  -1 -10   2  136.27   21.30
   1  10  -2  164.14   23.50
   0 -10   2   75.00   22.06
   0  10  -2   85.92   18.31
   1 -10   2    8.32   19.59
   2 -10   2   -3.56    9.62
   2 -10   2  -14.12   15.10
  -2  10  -2   -4.21   10.36
   3 -10   2    5.51   11.83
  -3  10  -2   13.75   11.74
   3 -10   2  -24.48   20.31
   5 -10   2  -17.40   17.20
   6 -10   2    1.51   22.31
   7 -10   2  108.55   38.46
   8 -10   2   15.71   34.13
   9 -10   2    4.76   37.30
  10 -10   2   33.51   42.29
  10   9  -2   -5.55   22.86
 -10  -9   2    0.96   28.76
   9   9  -2   21.93   19.79
  -9  -9   2   56.51   29.93
  -8  -9   2   23.73   23.93
   8   9  -2   17.29   19.38
   7   9  -2   34.35   17.89
  -7  -9   2   59.18   22.22
   6   9  -2   33.87   16.39
   6   9  -2   43.00   21.18
   5   9  -2  153.54   20.65
   5   9  -2  137.14   23.51
   4   9  -2   26.29   19.90
   4   9  -2   41.22   15.54
   3   9  -2  111.55   14.55
   3   9  -2   99.78   19.97
  -2  -9   2  207.25   20.15
   2   9  -2  147.34   23.63
   1   9  -2  138.51   22.15
   0  -9   2 1036.62   84.51
   0   9  -2  898.00   71.25
  -1   9  -2  197.72   21.34
   1  -9   2  127.26   23.97
  -2   9  -2   59.05   14.76
   2  -9   2   64.89   15.92
   2  -9   2   35.23   18.84
  -3   9  -2   11.22   10.91
   3  -9   2    8.87    9.70
   4  -9   2  488.15   52.54
   4  -9   2  409.44   35.98
   5  -9   2   38.84   14.70
   5  -9   2   11.13   23.10
   6  -9   2   15.29   22.04
   7  -9   2   48.92   32.04
   8  -9   2   93.75   39.52
   9  -9   2   18.21   31.63
  10  -9   2   74.61   48.14
 -10  -8   2   12.63   28.35
  10   8  -2   -8.54   17.73
  -9  -8   2   12.33   24.42
   9   8  -2   -8.87   14.79
   8   8  -2  -19.54   15.31
  -8  -8   2  -11.42   19.68
  -7  -8   2   43.36   19.47
   7   8  -2    3.47   15.27
   6   8  -2   79.80   20.67
   5   8  -2  143.58   23.40
   5   8  -2  125.16   18.90
   4   8  -2  116.16   21.90
   4   8  -2  138.98   18.24
   3   8  -2   85.20   12.60
   3   8  -2   92.39   22.17
   2   8  -2   -3.09   14.31
   1   8  -2  485.67   40.72
   0   8  -2  231.88   24.31
  -1   8  -2  850.27   62.05
  -2   8  -2  -10.35    8.24
   2  -8   2   -0.51    8.19
   3  -8   2  743.32   67.23
   3  -8   2  672.59   48.51
  -3   8  -2  679.22   51.25
   4  -8   2    3.10   10.64
  -4   8  -2    9.85   11.21
   4  -8   2  -15.89   13.92
   5  -8   2  260.26   36.83
   5  -8   2  211.97   23.59
   6  -8   2  139.59   19.59
   6  -8   2  118.66   30.74
   7  -8   2  112.41   33.01
   8  -8   2    9.41   28.89
   9  -8   2   72.98   38.29
  10  -8   2   43.19   43.52
  10   7  -2  -15.40   23.60
   9   7  -2  114.53   30.48
  -9  -7   2  114.71   30.90
  -8  -7   2    3.89   18.28
   8   7  -2   -6.07   16.13
  -7  -7   2  641.67   55.40
   6   7  -2    0.87   12.53
  -6  -7   2   18.08   14.64
   5   7  -2  391.83   33.71
   5   7  -2  394.00   37.54
   4   7  -2   25.81   12.98
   4   7  -2   22.81   16.13
   3   7  -2  661.71   43.43
   3   7  -2  578.09   50.32
   2   7  -2   73.31    9.42
   2   7  -2   64.67   16.13
   1   7  -2 1120.52   80.39
   0   7  -2  122.77   17.03
  -1   7  -2    7.03    9.03
  -2   7  -2  313.99   27.92
   2  -7   2  379.54   28.94
   3  -7   2  637.63   43.15
  -3   7  -2  578.04   44.49
   3  -7   2  590.24   58.34
  -4   7  -2  137.19   17.42
   5  -7   2  -17.05   16.66
   5  -7   2   21.03   12.00
   6  -7   2   16.87   21.30
   6  -7   2   22.96   13.72
   7  -7   2    8.96   15.23
   7  -7   2   -5.68   23.11
   8  -7   2   39.40   29.58
   8  -7   2   47.20   20.18
   9  -7   2   39.06   32.75
  11   6  -2    5.73   26.36
  10   6  -2    4.97   21.64
  -9  -6   2    6.05   20.22
   9   6  -2   -7.95   20.01
   8   6  -2  113.78   27.08
  -8  -6   2  121.41   27.44
  -7  -6   2    9.30   17.37
   7   6  -2    4.51   13.30
  -6  -6   2  198.58   25.27
   6   6  -2  212.67   24.66
   5   6  -2   55.83   15.46
   4   6  -2   -9.03    8.57
   4   6  -2   -8.71    9.78
   3   6  -2   72.60   14.31
   3   6  -2   91.40   11.78
   2   6  -2  482.77   32.62
   2   6  -2  480.96   40.04
   1   6  -2  455.54   36.66
   0   6  -2   27.35    9.78
   1  -6   2   18.64    9.05
  -1   6  -2   33.32    8.66
   2  -6   2  328.47   26.50
  -2   6  -2  322.22   25.76
   3  -6   2  482.04   35.86
   3  -6   2  475.61   48.11
   5  -6   2  383.77   31.35
   5  -6   2  346.24   43.47
   6  -6   2   87.83   25.72
   6  -6   2   89.31   17.67
   7  -6   2   71.10   28.59
   7  -6   2   40.10   18.36
   8  -6   2   26.36   16.24
   8  -6   2   39.57   28.30
   9  -6   2   42.09   34.10
   9  -6   2   45.92   19.68
  11   5  -2   -3.00   20.91
  10   5  -2  -20.00   16.77
  -9  -5   2   -4.46   18.19
   9   5  -2  -15.67   16.34
   8   5  -2   -1.02   15.54
  -8  -5   2   -8.13   17.44
  -7  -5   2   60.91   20.62
   7   5  -2   54.55   18.99
   6   5  -2   71.83   17.20
  -6  -5   2   94.22   19.46
   5   5  -2    8.68   10.47
  -5  -5   2   -1.63   10.82
   4   5  -2   49.75   14.66
   4   5  -2   47.24   11.18
   3   5  -2   11.92    7.42
   3   5  -2    0.68   10.18
   2   5  -2  628.84   46.04
   2   5  -2  563.61   38.16
   1   5  -2   14.84    9.25
   0   5  -2  955.77   66.57
   1  -5   2  133.15   13.41
  -1   5  -2  130.64   13.33
  -2   5  -2  540.17   38.02
   2  -5   2  528.95   37.31
  -3   5  -2  152.90   15.99
   3  -5   2  185.22   17.75
   4  -5   2 1345.83  111.94
   4  -5   2 1241.59   81.23
   5  -5   2  -14.91   12.29
   5  -5   2   15.73   10.96
   6  -5   2  263.39   35.98
   6  -5   2  236.80   25.33
   7  -5   2   15.48   14.73
   7  -5   2    3.95   20.59
   8  -5   2  198.58   26.08
   8  -5   2  239.88   38.93
   9  -5   2   26.02   29.02
   9  -5   2   29.38   19.85
  10  -5   2   54.65   22.02
  11   4  -2  -19.28   22.36
  10   4  -2   72.73   27.54
   9   4  -2  -16.33   14.65
  -9  -4   2   11.29   20.46
   8   4  -2  115.94   20.97
  -8  -4   2  116.39   26.97
  -7  -4   2   -1.79   16.51
   7   4  -2   -1.23   13.53
  -6  -4   2  260.49   27.80
   6   4  -2  300.10   27.55
   5   4  -2  339.56   30.35
  -5  -4   2  424.58   33.81
   4   4  -2  252.38   22.11
   3   4  -2    0.36    6.66
   3   4  -2    6.03    8.09
   2   4  -2  156.18   12.39
   2   4  -2  113.51   14.04
   1   4  -2  769.75   54.73
   0   4  -2 1504.63  100.95
  -1   4  -2  218.20   17.00
   1  -4   2  201.35   17.45
   2  -4   2  109.67   11.92
  -2   4  -2  121.04   10.65
  -3   4  -2  364.31   29.53
   3  -4   2  421.94   29.83
  -4   4  -2   13.73   12.06
   4  -4   2   37.71   11.56
   4  -4   2   12.86   13.80
  -5   4  -2  192.59   24.88
   5  -4   2  185.02   28.72
   5  -4   2  194.09   20.32
   6  -4   2  -12.22   16.10
   7  -4   2    1.23   19.61
   7  -4   2   14.59   13.21
   8  -4   2   84.82   21.42
   8  -4   2   90.35   30.57
   9  -4   2  115.85   27.77
  10  -4   2    6.39   21.12
  11  -4   2   -0.25   20.31
  11   3  -2   67.46   28.55
  10   3  -2    9.33   18.03
   9   3  -2  108.75   27.62
  -8  -3   2   72.25   23.04
   8   3  -2   62.72   20.47
  -7  -3   2  401.21   37.30
   7   3  -2  416.59   35.96
   6   3  -2   -1.63    9.67
  -6  -3   2  -14.40   11.69
   5   3  -2  722.65   70.79
   5   3  -2  779.70   51.87
  -5  -3   2  735.38   55.41
   4   3  -2    8.14    8.60
  -4  -3   2   -7.15    7.79
   3   3  -2  561.62   37.59
   2   3  -2    5.34    3.95
   2   3  -2    4.14    5.48
   1   3  -2  949.14   64.91
   0   3  -2   61.45    7.60
   1  -3   2   65.09    8.49
   2  -3   2   71.25    8.99
  -3   3  -2   19.44   10.66
   3  -3   2   41.13    9.56
   4  -3   2  -15.53   10.33
  -4   3  -2    6.03   10.09
   4  -3   2    5.83    8.36
   5  -3   2    3.44    9.77
  -5   3  -2   -9.56    9.97
   5  -3   2  -15.81   11.13
   6  -3   2  149.56   27.00
   6  -3   2  200.95   22.25
   7  -3   2   -6.03   10.96
   7  -3   2    5.08   19.83
   8  -3   2   18.38   24.06
   8  -3   2   11.06   17.42
   9  -3   2   71.62   23.18
  10  -3   2   11.77   22.19
  11  -3   2   25.17   26.76
  11   2  -2    4.58   19.74
  10   2  -2    3.81   18.23
   9   2  -2    1.97   16.01
   8   2  -2    5.58   14.87
  -8  -2   2   20.17   17.15
   7   2  -2   13.63   13.37
  -7  -2   2   17.99   15.47
   6   2  -2  187.54   21.98
  -6  -2   2  245.54   24.54
   6   2  -2  192.99   33.59
   5   2  -2   23.14   16.52
   5   2  -2   42.91   12.45
  -5  -2   2   35.08   11.83
  -4  -2   2   16.37    9.20
   4   2  -2   14.55    8.75
   4   2  -2   -1.83   13.41
  -3  -2   2  786.55   55.04
  -2  -2   2  201.55   16.27
   2   2  -2  182.80   14.47
   1   2  -2  406.17   23.29
   1   2  -2  344.90   26.38
   0   2  -2  109.12    8.95
   1  -2   2 1152.56   69.24
   2  -2   2    6.55    4.57
   3  -2   2  377.36   28.10
   4  -2   2    2.86    8.45
  -4   2  -2    3.07    5.62
  -5   2  -2  535.11   37.14
   5  -2   2  486.34   46.97
   5  -2   2  411.81   35.64
   6  -2   2    6.54   11.00
   6  -2   2   -4.71   13.20
   7  -2   2  311.36   31.28
   7  -2   2  308.56   39.91
   8  -2   2   12.46   21.06
   8  -2   2   14.11   15.36
   9  -2   2   80.74   24.38
  10  -2   2   11.25   20.97
  11  -2   2   56.50   29.75
  11   1  -2  -16.40   16.86
  10   1  -2    1.29   19.51
   9   1  -2   76.08   23.80
  -8  -1   2    6.55   16.76
   8   1  -2   15.31   16.64
   7   1  -2   -8.82   11.62
  -7  -1   2  -14.62   10.79
   6   1  -2   13.43   11.30
  -6  -1   2  -10.80   11.58
   6   1  -2   -6.45   16.44
   5   1  -2   84.43   20.97
  -5  -1   2  111.41   14.41
   5   1  -2   81.19   12.98
   4   1  -2  337.73   37.62
   4   1  -2  365.85   26.93
   3   1  -2   67.03   15.74
   3   1  -2  112.83   11.30
  -3  -1   2   97.97   11.30
   2   1  -2  864.32   74.04
   2   1  -2  904.87   51.53
  -2  -1   2  774.01   57.55
  -1  -1   2   -1.01    2.20
   1   1  -2    1.55    1.45
   1  -1   2 1098.23   65.63
   2  -1   2  602.77   39.54
   3  -1   2 1089.66   65.84
  -3   1  -2  981.20   68.86
   4  -1   2  193.79   22.15
   4  -1   2  159.48   18.10
  -4   1  -2  205.48   16.08
   5  -1   2   21.37   10.90
  -5   1  -2   17.71    7.41
   5  -1   2   11.43   12.23
   6  -1   2  163.42   20.62
   6  -1   2  158.29   26.03
  -6   1  -2  210.56   21.04
   7  -1   2  109.73   26.21
   7  -1   2   99.91   23.50
   8  -1   2  139.77   23.70
   9  -1   2   52.22   24.19
  10  -1   2   64.52   24.30
  11  -1   2   26.16   27.88
  11   0  -2   -3.16   18.17
  10   0  -2  149.15   30.71
   9   0  -2    3.40   14.52
  -8   0   2  332.80   36.24
   8   0  -2  247.75   28.15
   7   0  -2  -20.82   18.72
  -7   0   2  -15.81   12.62
  -6   0   2  308.62   29.21
   6   0  -2  308.34   27.57
   6   0  -2  317.02   39.64
   5   0  -2  -13.33    6.68
  -4   0   2 2892.27  186.12
   4   0  -2 2629.87  163.98
   4   0  -2 2897.28  228.77
  -2   0   2  867.76   54.42
   2   0  -2  754.58   47.63
   2   0  -2  750.08   67.55
   1   0  -2    0.27    5.08
   1   0  -2    3.01    1.52
  -1   0   2    3.10    2.16
   1   0   2   48.95    6.36
   2   0   2 1726.31  102.83
   3   0   2   -5.53    7.00
   4   0   2   65.90   12.00
  -4   0  -2   95.16    9.92
   4   0   2   86.71   13.69
   5   0   2   -9.11    9.59
  -5   0  -2   -9.40    6.14
  -6   0  -2  215.05   21.34
   6   0   2  198.87   26.16
   6   0   2  188.57   22.81
   7   0   2   12.48   14.71
   7   0   2   -6.18   15.67
   8   0   2   63.42   22.73
   9   0   2  -10.97   16.42
  10   0   2   -3.33   22.64
  11   0   2   -0.02   23.07
  11  -1  -2   -1.43   17.86
  10  -1  -2   12.05   20.44
   9  -1  -2   75.37   21.33
   8  -1  -2    9.59   15.97
   7  -1  -2  -17.96   17.61
  -7   1   2  -11.73   13.60
   7  -1  -2  -16.81   12.05
   6  -1  -2   14.94   11.55
  -6   1   2   -8.36   11.79
   6  -1  -2   -2.46   18.92
   5  -1  -2  105.66   24.68
   5  -1  -2  108.40   14.36
  -5   1   2   83.23   15.09
  -4   1   2  305.45   28.45
   4  -1  -2  378.33   26.72
   4  -1  -2  371.70   38.34
  -3   1   2   86.86   11.12
   3  -1  -2   79.83   14.76
   3  -1  -2   80.76    9.57
  -2   1   2  895.70   58.26
   2  -1  -2  778.00   71.29
   2  -1  -2  856.69   50.48
   2   1   2  723.98   52.02
   2   1   2  807.93   49.11
   3   1   2 1215.81   74.59
   3   1   2 1158.78   79.76
   4   1   2  220.43   23.35
   4   1   2  242.24   22.64
   5   1   2   28.26   12.54
   5   1   2   14.42    9.59
  -5  -1  -2    4.69    7.66
  -6  -1  -2  181.89   19.75
   6   1   2  132.74   20.11
   6   1   2  188.26   24.81
   7   1   2   90.38   22.16
  -7  -1  -2   69.49   17.98
   8   1   2  132.25   26.79
   9   1   2   52.22   25.10
  10   1   2   46.01   25.63
  11   1   2   40.98   25.39
  11  -2  -2   20.35   23.97
  10  -2  -2   17.98   20.26
   9  -2  -2   14.74   15.21
   8  -2  -2   55.50   30.01
   8  -2  -2   39.10   18.53
   7  -2  -2   24.89   22.68
  -7   2   2   31.25   19.01
   7  -2  -2   32.37   13.89
  -6   2   2  242.19   26.86
   6  -2  -2  230.12   34.68
   6  -2  -2  238.38   23.16
   5  -2  -2   33.21   10.42
  -5   2   2   20.38   12.78
   5  -2  -2   38.42   16.88
   4  -2  -2   -0.23   12.93
  -4   2   2   14.25    9.30
   4  -2  -2   15.43    8.60
  -3   2   2  739.28   53.68
   3  -2  -2  709.34   64.94
   3  -2  -2  784.41   46.30
  -2   2   2  148.19   15.67
   2  -2  -2  148.66   11.06
   2  -2  -2  143.05   17.18
   1  -2  -2  389.23   37.33
  -1   2   2  451.13   33.45
   0  -2  -2  110.17   13.05
   0   2   2  111.92   10.52
   1   2   2 1823.19  131.19
   1   2   2 2156.18  116.33
   2   2   2    0.23    4.51
   2   2   2   -2.72    4.91
   4   2   2   -5.32    8.51
   4   2   2    0.96    5.99
   4   2   2    3.80    8.03
   5   2   2  567.02   46.87
   5   2   2  466.33   39.76
   6   2   2   -3.87   10.80
  -6  -2  -2   -9.66    9.12
   6   2   2   -1.86   11.70
  -7  -2  -2  303.31   28.87
   7   2   2  230.81   28.77
   8   2   2    9.50   15.76
   9   2   2   73.28   24.68
  10   2   2    9.86   19.73
  11   2   2   93.11   33.65
  10  -3  -2   16.54   18.94
   9  -3  -2   87.59   21.63
   8  -3  -2  103.28   33.33
   8  -3  -2   74.20   20.71
  -7   3   2  462.81   45.19
   7  -3  -2  408.40   50.29
   7  -3  -2  424.29   35.14
  -6   3   2   -7.76   14.45
   6  -3  -2    1.84    8.20
   6  -3  -2   -5.06   14.92
   5  -3  -2  644.25   61.33
  -5   3   2  637.97   50.76
   5  -3  -2  617.74   42.75
  -4   3   2   27.02   12.14
   4  -3  -2   -8.68   10.57
   4  -3  -2    9.94    6.97
   3  -3  -2  448.82   30.10
   3  -3  -2  438.00   43.64
  -3   3   2  512.84   39.88
   2  -3  -2   -1.91    5.02
   2  -3  -2    3.15    2.94
  -2   3   2   -5.62    8.06
   1  -3  -2  965.41   77.84
  -1   3   2  888.96   65.83
   0  -3  -2   49.25    8.83
   0   3   2   56.16    7.55
   1   3   2  102.46   11.32
   1   3   2  100.80    9.41
   2   3   2  163.05   14.44
   2   3   2  134.31   14.70
   3   3   2   64.77   13.40
   3   3   2   55.66   11.36
   4   3   2   -5.46    9.66
   4   3   2   -7.14    8.97
   4   3   2   -7.95    5.36
   5   3   2    0.70    7.16
   5   3   2  -12.64   12.03
   5   3   2   -0.23    8.70
  -6  -3  -2  175.04   20.17
   6   3   2  152.16   22.30
  -7  -3  -2    4.20   13.59
   7   3   2  -16.25   16.30
   8   3   2   -5.85   14.11
   9   3   2   49.80   23.14
  10   3   2   13.68   23.69
  11   3   2   27.20   26.73
   9  -4  -2   -6.99   15.01
   9  -4  -2   -3.83   25.81
   8  -4  -2  163.26   34.68
   8  -4  -2  121.22   20.47
   7  -4  -2   26.34   13.66
   7  -4  -2   12.06   20.08
   6  -4  -2  236.74   34.28
  -6   4   2  202.02   30.22
   6  -4  -2  259.00   22.70
   5  -4  -2  361.14   40.31
   5  -4  -2  358.02   26.74
  -5   4   2  313.00   34.88
   4  -4  -2  217.98   28.01
  -4   4   2  228.62   27.31
   4  -4  -2  258.08   19.28
  -3   4   2   -1.54   12.67
   3  -4  -2    7.96    4.93
   3  -4  -2   -8.77    7.12
  -2   4   2   81.64   14.88
   2  -4  -2   99.85   15.19
   1  -4  -2  712.68   58.04
  -1   4   2  617.30   48.92
   0   4   2 1326.91   90.40
   1   4   2  269.88   22.59
   1   4   2  250.40   18.56
   2   4   2  246.21   23.61
   2   4   2  300.55   22.11
   3   4   2  605.05   43.50
   3   4   2  513.64   39.54
   4   4   2   19.58   11.01
   4   4   2    9.03   10.54
   5   4   2  235.63   26.36
   5   4   2  266.77   25.70
   6   4   2    3.82   13.99
  -7  -4  -2   22.55   16.40
   7   4   2    8.89   17.16
   8   4   2   87.63   28.07
   9   4   2   88.57   28.29
  10   4   2  -12.46   24.98
  11   4   2  -17.77   18.75
   9  -5  -2    7.77   29.67
   8  -5  -2   34.13   27.47
   8  -5  -2   17.39   14.86
  -6   5   2   51.89   26.39
   6  -5  -2   74.90   22.91
   6  -5  -2   73.05   13.53
  -5   5   2    0.16   17.64
   5  -5  -2    9.52    8.88
   5  -5  -2  -13.35   13.80
   4  -5  -2   45.29    9.00
  -4   5   2   35.57   18.82
   4  -5  -2    8.74   14.45
  -3   5   2    6.65   14.65
   3  -5  -2    5.65    4.83
  -2   5   2  361.00   35.77
   2  -5  -2  459.42   25.86
   2  -5  -2  429.46   39.99
   1  -5  -2   -2.81    6.44
  -1   5   2    8.66    7.18
   0   5   2  908.22   50.86
   0  -5  -2  834.43   73.33
  -1  -5  -2  161.77   17.73
   1   5   2  157.82   13.08
   1   5   2  142.67   16.12
   2   5   2  757.84   47.71
   2   5   2  693.75   53.73
   3   5   2  291.24   24.82
   3   5   2  270.64   26.66
   4   5   2 1949.72  113.30
   4   5   2 1642.23  123.25
   5   5   2    2.83   11.35
   5   5   2   -9.80   13.63
   6   5   2  303.92   32.62
   6   5   2  323.09   30.64
   7   5   2    4.80   18.33
   8   5   2  198.89   30.85
  -8  -5  -2  267.54   32.62
   9   5   2    1.76   21.14
  10   5   2   74.90   33.25
  11   5   2  -14.54   24.68
   9  -6  -2   42.44   33.64
   8  -6  -2  126.36   32.28
   7  -6  -2   19.77   12.95
   7  -6  -2   46.41   24.59
  -6   6   2  116.62   32.06
   6  -6  -2  204.30   19.37
   6  -6  -2  153.72   30.12
   5  -6  -2   10.68   16.86
   5  -6  -2   42.05   11.02
  -5   6   2   28.07   22.30
   4  -6  -2   -1.36    5.67
  -4   6   2  -10.69   15.57
  -3   6   2   88.25   22.18
   3  -6  -2   78.43    8.74
   3  -6  -2   81.70   18.64
   2  -6  -2  353.43   21.18
  -2   6   2  294.68   30.61
   2  -6  -2  340.46   36.05
   1  -6  -2  385.96   40.39
  -1   6   2  480.90   36.37
   0   6   2   14.96    9.15
   0  -6  -2    8.76    7.84
   1   6   2   32.00    7.73
   1   6   2   42.69   12.01
  -1  -6  -2   28.38    8.89
  -2  -6  -2  470.85   40.61
   2   6   2  495.47   33.52
   2   6   2  416.54   37.58
   3   6   2  595.35   42.21
   3   6   2  563.49   46.54
   4   6   2   11.46   12.66
   4   6   2    0.49   11.02
   5   6   2  392.98   36.48
   5   6   2  432.93   37.75
   6   6   2  100.36   24.57
   6   6   2   92.24   18.19
   7   6   2   16.21   17.82
  -8  -6  -2   46.57   24.45
   8   6   2   17.50   20.99
   9   6   2   19.13   23.47
  10   6   2   54.79   27.98
  11   6   2  -31.08   27.47
  10  -7  -2    9.78   34.22
   9  -7  -2  145.14   37.56
   8  -7  -2   30.82   27.65
   7  -7  -2  578.43   64.81
   6  -7  -2    1.12   18.77
   5  -7  -2  288.67   23.41
  -5   7   2  272.20   40.26
   5  -7  -2  320.15   39.40
  -4   7   2   28.44   22.16
   4  -7  -2   31.17    8.33
  -3   7   2  323.34   36.71
   3  -7  -2  424.97   25.43
   3  -7  -2  389.85   41.69
  -2   7   2   69.33   14.20
   2  -7  -2   47.44    6.46
   2  -7  -2   57.69   15.70
  -1   7   2 1090.04   77.60
   1  -7  -2 1058.77   92.25
   1   7   2   11.39    9.85
   1   7   2    9.19    6.06
   2   7   2  456.59   32.04
   2   7   2  398.28   36.83
   3   7   2  864.48   60.02
   3   7   2  930.75   69.12
   4   7   2  208.27   26.43
   4   7   2  193.81   22.65
   5   7   2    2.84   13.05
   5   7   2    2.67   15.17
   6   7   2   -6.44   15.93
   6   7   2   -5.82   16.33
   7   7   2  -28.24   15.13
   7   7   2    7.33   19.19
  -8  -7  -2   39.83   21.84
   8   7   2    8.53   25.26
   9   7   2   -5.54   21.82
  10   7   2  -22.38   23.49
  10  -8  -2   49.93   43.33
   9  -8  -2   23.95   33.07
   8  -8  -2   12.67   28.81
   7  -8  -2    6.15   20.86
   6  -8  -2   59.89   27.57
  -5   8   2   79.07   28.02
   5  -8  -2  122.64   30.69
  -4   8   2  110.64   28.26
   4  -8  -2  111.16   25.37
   3  -8  -2   64.64    8.20
   3  -8  -2   55.69   20.08
  -3   8   2   88.95   22.33
   2  -8  -2    6.16    5.43
  -2   8   2   22.57   13.02
   1  -8  -2  467.13   29.85
   1  -8  -2  446.84   45.67
  -1   8   2  468.43   39.38
   0   8   2  274.31   27.30
  -1  -8  -2  956.37   79.94
   1   8   2  992.55   70.36
   1   8   2  843.32   56.74
   2   8   2   -3.47   12.12
   2   8   2   -8.34    8.34
   3   8   2 1008.83   65.72
   3   8   2  949.23   74.76
   4   8   2    3.32   13.24
   4   8   2    7.21   16.25
   5   8   2  295.60   33.24
   5   8   2  288.58   30.23
   6   8   2   88.68   24.19
   6   8   2  125.76   26.32
   7   8   2  105.84   25.89
   7   8   2  108.61   28.77
   8   8   2  -25.21   18.90
   9   8   2   40.41   31.48
  10   8   2   31.95   29.04
  10  -9  -2   23.80   40.34
   9  -9  -2   71.91   41.86
   8  -9  -2   41.09   34.20
   7  -9  -2   94.94   34.52
   6  -9  -2   22.97   25.53
   5  -9  -2  169.59   33.24
  -5   9   2  181.01   33.72
   4  -9  -2   27.86   19.51
  -4   9   2   43.41   23.21
  -3   9   2  132.04   23.02
   3  -9  -2  113.61   29.18
  -2   9   2  197.41   25.12
   1  -9  -2  104.65   26.23
  -1   9   2  157.19   20.76
   0  -9  -2  774.25   76.03
   0   9   2  962.83   67.17
   1   9   2  222.50   18.18
   1   9   2  245.51   26.98
   2   9   2   92.53   21.80
  -2  -9  -2   81.12   15.45
   2   9   2   47.82   14.88
   3   9   2  -14.65   11.13
   3   9   2   22.83   17.27
   4   9   2  616.62   46.97
   4   9   2  560.83   51.79
   5   9   2   23.99   21.21
   5   9   2   26.63   16.51
   6   9   2  -14.52   18.69
   6   9   2    6.53   19.75
   7   9   2   19.32   24.25
   7   9   2   33.50   22.28
   8   9   2   38.34   28.87
  -9  -9  -2  -15.98   25.08
   9   9   2  -26.26   24.81
  10   9   2   12.17   26.96
  10 -10  -2   77.14   47.45
   9 -10  -2   29.97   38.91
   8 -10  -2  167.36   49.11
   7 -10  -2   -8.00   23.77
   6 -10  -2  150.04   35.49
   5 -10  -2   12.66   19.68
  -5  10   2    5.11   25.64
   4 -10  -2  385.52   48.20
  -4  10   2  369.92   42.66
  -3  10   2  124.53   23.77
   2 -10  -2  106.67   22.36
  -2  10   2  124.60   20.46
  -1  10   2  169.54   22.39
   1 -10  -2   88.70   23.58
   0  10   2  112.38   19.08
   0 -10  -2   57.29   23.59
   1  10   2   87.95   19.90
   2  10   2    8.37    9.32
   2  10   2   -6.50   11.89
  -2 -10  -2   -7.53    8.54
   3  10   2   33.44   18.55
   3  10   2   -7.95   12.30
   4  10   2   -6.66   18.61
   4  10   2  -11.45   12.91
   5  10   2  -27.42   19.65
   5  10   2  -19.41   15.13
   6  10   2   -8.06   20.07
   6  10   2   -8.02   21.12
   7  10   2   65.63   26.36
   7  10   2   40.36   27.27
   8  10   2   42.45   28.14
   8  10   2    7.48   23.78
  -9 -10  -2    4.48   31.05
  10  10   2  -22.48   32.73
  10 -11  -2   17.27   42.92
   9 -11  -2   83.66   46.21
   8 -11  -2    2.51   35.61
   7 -11  -2  116.35   41.28
   6 -11  -2   -5.76   23.28
   5 -11  -2  201.40   38.71
  -4  11   2  140.76   28.18
   4 -11  -2  179.95   34.50
   3 -11  -2  123.88   29.52
  -3  11   2  104.45   22.27
   2 -11  -2  189.23   34.00
  -2  11   2  243.72   30.04
  -1  11   2  125.95   20.99
   1 -11  -2  104.02   26.51
   0 -11  -2   27.93   17.37
   0  11   2   55.47   18.80
   1  11   2    8.32   16.01
  -1 -11  -2  -17.38   12.46
   2  11   2  919.80   59.02
   2  11   2  809.54   69.53
   3  11   2   59.60   24.86
   3  11   2   46.08   16.84
   4  11   2   45.60   19.48
   4  11   2   62.16   27.12
   5  11   2  -16.90   13.78
   5  11   2   -1.64   21.78
   6  11   2  215.50   30.97
   6  11   2  298.76   38.74
   7  11   2    1.24   23.45
   7  11   2   -3.69   24.64
   8  11   2   17.80   28.76
   8  11   2   57.01   27.48
  -9 -11  -2    0.20   24.34
   9  11   2  -43.34   29.00
  10  11   2  -29.30   33.41
   9 -12  -2   38.62   44.84
   8 -12  -2  104.19   42.92
   7 -12  -2   23.48   35.42
   6 -12  -2  164.49   39.33
   5 -12  -2    4.45   22.23
   3 -12  -2  342.03   46.31
  -3  12   2  317.49   38.16
   2 -12  -2   -0.12   18.24
  -2  12   2   -9.73   15.26
   1 -12  -2  -24.41   16.64
  -1  12   2  -16.32   14.38
   0  12   2   71.37   22.19
  -1 -12  -2  226.45   29.84
   1  12   2  230.21   29.02
   2  12   2   13.04   16.05
   3  12   2  380.33   42.89
   3  12   2  444.20   38.03
   4  12   2  -17.10   21.06
   4  12   2    6.11   18.52
   5  12   2  152.37   25.83
   5  12   2  188.01   40.29
   6  12   2   19.16   27.94
   6  12   2  -12.08   16.68
   7  12   2  294.66   41.02
   7  12   2  225.75   35.85
   8  12   2    9.40   30.00
   8  12   2  -16.79   26.62
   9  12   2  -26.48   27.15
   9 -13  -2  134.45   54.18
   8 -13  -2   61.76   45.10
   7 -13  -2   17.65   37.97
   6 -13  -2   15.64   31.82
   5 -13  -2  266.33   44.30
   4 -13  -2   20.61   24.55
  -4  13   2   60.95   29.49
   3 -13  -2  129.31   35.18
  -3  13   2  107.64   30.18
   2 -13  -2  -16.79   19.79
  -2  13   2   56.50   22.53
   1 -13  -2  -12.45   16.18
  -1  13   2    3.73   17.02
   0 -13  -2   -2.21   13.37
   0  13   2    7.72   18.46
   1  13   2   40.36   22.00
   2  13   2   46.50   21.55
   3  13   2   -4.32   16.07
   3  13   2  -13.66   21.77
   4  13   2   -1.38   20.01
   4  13   2  -18.89   24.72
   5  13   2   -5.73   21.70
   5  13   2  -19.68   26.59
   6  13   2   51.16   33.21
   6  13   2   72.06   30.89
   7  13   2   26.09   30.45
   7  13   2    3.21   25.88
   8  13   2   -1.40   30.34
   8  13   2  -10.26   23.79
   9  13   2   -9.59   32.91
   8 -14  -2  132.18   49.44
   7 -14  -2   -4.87   38.12
   6 -14  -2   98.64   39.25
   5 -14  -2   16.08   32.03
   4 -14  -2  440.12   57.53
   3 -14  -2  105.22   36.33
  -3  14   2  129.70   34.43
  -2  14   2   50.70   23.91
   1 -14  -2   39.48   25.26
  -1  14   2   64.01   25.01
   0  14   2  132.39   27.20
   0 -14  -2  142.92   30.86
   1  14   2  148.20   28.66
   2  14   2   16.17   25.50
   3  14   2  155.20   31.69
   4  14   2   14.41   24.36
   4  14   2   16.83   28.61
   5  14   2   87.92   36.78
   5  14   2   93.46   31.00
   6  14   2   16.29   26.47
   6  14   2   -1.05   31.71
   7  14   2   52.82   32.58
   7  14   2   69.86   39.04
   8  14   2  -14.95   31.54
   8  14   2  -24.09   24.32
   9  14   2   15.16   29.99
   8 -15  -2   36.93   49.05
   7 -15  -2   30.53   45.97
   6 -15  -2    0.55   33.77
   5 -15  -2   21.92   34.99
   4 -15  -2   65.43   34.51
  -3  15   2   34.19   28.97
   3 -15  -2   47.17   31.70
   2 -15  -2  163.30   36.18
  -2  15   2  169.34   30.64
   1 -15  -2  164.60   32.78
  -1  15   2   97.79   30.96
   0  15   2  262.05   36.22
   0 -15  -2  239.34   35.61
   1  15   2   36.74   25.61
   2  15   2  275.02   39.31
   3  15   2   39.16   30.52
   4  15   2  121.46   38.41
   5  15   2   -5.35   32.42
   6  15   2  120.47   43.74
   6  15   2  146.81   37.20
   7  15   2   -9.81   36.20
   7  15   2   16.41   30.29
   8  15   2   21.60   39.15
   8  15   2   -7.30   29.85
   7 -16  -2   13.45   45.72
   6 -16  -2  114.42   47.59
   5 -16  -2   20.63   38.68
   4 -16  -2  131.39   44.25
   3 -16  -2   45.50   31.47
  -3  16   2   83.06   33.59
   2 -16  -2  184.32   38.81
  -2  16   2  194.73   35.22
  -1  16   2   53.50   28.23
   1 -16  -2   21.66   26.04
   0  16   2   36.76   27.29
   1  16   2  108.17   34.11
   2  16   2  -17.55   23.98
   3  16   2   69.06   33.69
   4  16   2  -27.98   26.69
   5  16   2   33.80   37.25
   6  16   2  -52.99   33.26
   7  16   2  -19.84   37.96
   8  16   2  -15.31   38.96
   7 -17  -2  151.89   60.48
   6 -17  -2   42.37   42.03
   5 -17  -2   56.18   40.64
   4 -17  -2    1.26   36.22
   3 -17  -2  195.40   43.97
  -2  17   2   12.99   27.71
   2 -17  -2   33.56   32.60
  -1  17   2   62.31   31.35
   1 -17  -2   72.86   30.27
   0  17   2  101.47   34.28
   1  17   2  -18.31   25.24
   2  17   2   -9.74   26.38
   3  17   2  -11.16   29.65
   4  17   2   58.21   37.11
   5  17   2  -39.19   32.77
   6  17   2  -25.87   37.50
   7  17   2  -33.21   39.24
   6 -18  -2   18.42   46.83
   5 -18  -2   22.47   44.77
   4 -18  -2   30.44   39.21
   3 -18  -2  -20.37   31.17
  -2  18   2   64.21   37.67
  -1  18   2  194.98   45.23
   0  18   2   32.92   30.45
   1  18   2   12.20   29.89
   2  18   2    1.79   30.72
   3  18   2   53.81   36.63
   4  18   2  -32.95   30.86
   5  18   2   59.73   40.54
   6  18   2  -45.04   38.59
   5 -19  -2   98.81   52.75
   4 -19  -2   15.61   38.47
   3 -19  -2  164.57   48.51
  -2  19   2  -12.16   32.87
  -1  19   2   50.42   37.89
   0  19   2   25.74   33.80
   1  19   2   -7.80   29.94
   2  19   2  -20.40   28.99
   3  19   2    8.18   33.90
   4  19   2  111.91   44.61
   5  19   2  -38.30   36.74
   4 -20  -2   69.60   46.07
   3 -20  -2   53.61   38.04
  -1  20   2   30.56   36.35
   0  20   2    4.91   35.82
   1  20   2  -19.21   33.93
   2  20   2  -15.68   33.95
   3  20   2  -16.64   34.46
   4  20   2   -7.30   38.54
  -1  21   2   21.52   38.83
   0  21   2    3.81   35.52
   1  21   2  -19.24   34.11
   2  21   2   -7.18   36.67
   3  21   2  -11.70   37.81
  -1  22   2    2.78   41.99
   0  22   2  -14.17   38.42
   1  22   2  -38.03   37.01
   3  21  -3  -24.53   33.04
   2  21  -3  -14.97   33.10
   1  21  -3  -26.17   31.59
   4  20  -3    1.87   36.75
   3  20  -3  -35.33   33.34
   2  20  -3  -32.53   29.36
   1  20  -3  131.09   40.78
   0  20  -3   -8.20   28.25
   3 -20   3   71.31   33.78
   4 -20   3   16.44   34.75
   5  19  -3   -6.82   34.65
   4  19  -3   52.61   39.05
   3  19  -3  -18.20   31.03
   2  19  -3    9.71   31.92
   1  19  -3   36.45   30.51
   0  19  -3   73.89   32.27
   2 -19   3    7.72   26.10
   3 -19   3  -20.85   25.52
   4 -19   3   86.33   40.49
   5 -19   3   33.12   34.26
   6  18  -3   83.71   43.84
   5  18  -3   25.74   35.84
   4  18  -3  -13.02   32.50
   3  18  -3  -33.12   25.93
   2  18  -3   21.12   29.91
   1  18  -3   37.03   28.37
   0  18  -3   12.42   27.19
  -1  18  -3   33.55   29.41
   2 -18   3    6.18   26.09
   3 -18   3  -14.41   27.77
   4 -18   3    4.63   31.69
   5 -18   3   29.01   36.79
   6 -18   3   77.85   42.21
   6  17  -3   51.51   41.15
   5  17  -3   15.86   35.55
   4  17  -3   21.81   31.74
   3  17  -3   -9.82   29.25
   2  17  -3   83.66   31.47
   1  17  -3   55.97   28.03
   0  17  -3  170.52   37.62
  -1  17  -3   26.65   23.80
   1 -17   3   33.87   24.85
   2 -17   3   28.59   26.26
   3 -17   3   16.40   30.50
   4 -17   3   92.19   39.18
   5 -17   3   19.75   37.42
   6 -17   3   76.80   45.42
   7 -17   3   -1.94   41.35
   6  16  -3   -5.18   33.70
   5  16  -3   87.38   39.17
   4  16  -3   88.20   36.82
   3  16  -3   25.77   27.73
   2  16  -3    9.52   25.78
   1  16  -3  160.58   29.79
   0  16  -3   13.38   25.30
   1 -16   3  121.24   28.29
  -1  16  -3  131.85   31.78
   2 -16   3    2.03   23.07
   3 -16   3  145.56   40.96
   4 -16   3    6.58   26.78
   5 -16   3  168.31   48.49
   6 -16   3   40.76   38.73
   7 -16   3   14.78   39.89
  -8 -15   3   -3.43   14.94
   6  15  -3  -12.82   32.30
   5  15  -3   -0.81   31.47
   4  15  -3    7.31   28.97
   3  15  -3   51.47   30.27
   2  15  -3   19.69   24.70
   1  15  -3   17.91   22.93
   0 -15   3   -7.42   16.20
   0  15  -3   35.75   25.12
  -1  15  -3    0.62   21.28
   1 -15   3  -13.74   20.03
  -2  15  -3   19.67   20.99
   2 -15   3   41.73   26.19
   3 -15   3   11.75   27.26
   4 -15   3   80.98   35.79
   5 -15   3   28.56   29.91
   6 -15   3   22.97   35.85
   7 -15   3   98.33   45.79
   8 -15   3    6.61   41.46
   8  14  -3    5.03   27.24
  -8 -14   3   26.24   18.36
   6  14  -3   40.31   31.54
   5  14  -3   -4.44   28.32
   4  14  -3   36.41   31.46
   3  14  -3  262.47   38.29
   2  14  -3   23.12   25.22
   1  14  -3   44.26   24.24
   0 -14   3   -0.84   17.27
   0  14  -3    4.59   21.22
  -1  14  -3  285.04   34.87
   1 -14   3  335.29   41.59
   2 -14   3    7.70   24.22
  -2  14  -3   25.59   19.86
   3 -14   3   67.05   31.99
   4 -14   3   -5.67   27.87
   5 -14   3    5.67   29.91
   6 -14   3    6.93   27.53
   7 -14   3  111.55   46.32
   8 -14   3   42.61   42.51
   9  13  -3   11.95   25.87
  -9 -13   3  -20.09   20.17
   8  13  -3   16.27   28.67
  -8 -13   3   29.03   20.48
   7  13  -3  -13.34   23.29
   6  13  -3  111.23   35.62
   5  13  -3  -19.86   21.24
   4  13  -3  205.55   35.07
   3  13  -3   17.30   25.05
   2  13  -3  377.77   42.00
  -1 -13   3   11.81   13.70
   1  13  -3   26.05   19.61
   0  13  -3   47.45   20.76
   0 -13   3   79.41   20.87
   1 -13   3   25.98   18.83
  -1  13  -3   22.99   15.70
  -2  13  -3  246.73   30.08
   2 -13   3  309.67   40.15
   3 -13   3   35.92   25.92
   4 -13   3  121.56   36.97
   5 -13   3  -16.11   21.52
   6 -13   3  146.81   38.46
   7 -13   3   56.41   38.34
   8 -13   3   99.05   46.03
   9 -13   3   -6.20   38.41
   9  12  -3  -38.03   21.88
  -9 -12   3    7.74   23.72
  -8 -12   3  101.11   27.47
   8  12  -3   60.22   25.80
   7  12  -3   -8.21   17.26
  -7 -12   3   -8.61   14.12
   6  12  -3   17.24   20.05
   6  12  -3   40.67   27.10
   5  12  -3   -4.17   23.89
   4  12  -3  307.09   39.74
   3  12  -3  186.99   30.86
   2  12  -3   17.25   19.83
  -1 -12   3   -4.08   10.91
   1  12  -3   -6.14   13.44
   0  12  -3  118.64   24.64
   0 -12   3  107.50   24.88
   1 -12   3   55.88   22.13
  -1  12  -3   71.98   20.95
   2 -12   3   15.61   19.34
  -2  12  -3    5.45   14.60
   3 -12   3  119.83   31.04
   4 -12   3   -9.48   25.10
   5 -12   3    9.81   26.88
   6 -12   3   -4.38   28.07
   7 -12   3  108.19   39.99
   8 -12   3  132.69   47.67
   9 -12   3   11.01   36.39
 -10 -11   3   -7.90   33.04
   9  11  -3   52.16   28.89
  -9 -11   3   45.21   28.66
  -8 -11   3   15.60   22.56
   8  11  -3   -6.70   19.80
  -7 -11   3    1.26   18.02
   7  11  -3   -1.60   18.20
   6  11  -3   52.59   24.09
   6  11  -3   69.66   27.44
   5  11  -3  117.42   31.68
   5  11  -3   96.32   22.93
   4  11  -3   11.38   19.40
   3  11  -3   78.39   25.72
   2  11  -3  108.66   26.30
   1  11  -3   83.47   20.56
  -1 -11   3   70.82   16.99
   0  11  -3  149.25   22.78
   0 -11   3  204.68   26.87
   1 -11   3   27.66   18.00
  -1  11  -3   32.95   16.39
   2 -11   3   79.59   19.63
   2 -11   3   99.56   23.83
   3 -11   3  208.11   34.59
  -3  11  -3  200.62   23.33
   3 -11   3  195.48   23.67
   4 -11   3  132.69   28.85
   5 -11   3   44.61   25.79
   6 -11   3    6.43   24.72
   7 -11   3  148.68   38.01
   8 -11   3   46.32   37.93
   9 -11   3   86.17   45.66
  10 -11   3   27.19   43.98
  10  10  -3   -4.38   20.59
 -10 -10   3   -0.22   29.60
   9  10  -3  -22.84   19.68
  -9 -10   3  -10.67   22.98
   8  10  -3   13.47   20.20
  -8 -10   3   14.37   22.37
  -7 -10   3   79.63   25.00
   7  10  -3   70.73   25.20
   6  10  -3   -9.63   14.12
   5  10  -3  127.37   25.01
   5  10  -3   99.86   28.34
   4  10  -3  171.48   21.86
   4  10  -3  142.96   24.68
   3  10  -3  558.41   50.20
   2  10  -3   25.66   18.29
   1  10  -3  455.36   41.60
   0  10  -3   80.82   19.63
  -1  10  -3  371.44   33.51
   2 -10   3   -2.69   11.97
   2 -10   3   19.35   17.65
  -2  10  -3   20.98   12.87
   3 -10   3  312.93   29.90
   3 -10   3  359.84   43.11
  -3  10  -3  311.60   29.41
   4 -10   3   22.87   14.81
   4 -10   3   -1.49   20.44
   5 -10   3   99.92   32.50
   6 -10   3   94.99   33.41
   7 -10   3  165.08   38.24
   8 -10   3   16.39   29.40
   9 -10   3   21.52   37.75
  10 -10   3   26.22   42.52
 -10  -9   3    0.71   26.79
  10   9  -3  -32.65   24.84
   9   9  -3   54.10   26.51
  -9  -9   3   79.58   31.26
   8   9  -3   12.39   19.10
  -8  -9   3    4.66   22.94
   7   9  -3  147.03   23.10
  -7  -9   3  146.71   25.80
   6   9  -3   50.82   20.35
   5   9  -3   95.59   17.22
   5   9  -3  102.13   25.82
   4   9  -3  166.03   27.31
   4   9  -3  226.32   23.05
   3   9  -3   -3.83   15.76
   2   9  -3  389.62   38.00
   1   9  -3  203.40   25.42
   0   9  -3  110.70   18.67
  -1   9  -3   11.81   12.28
  -2   9  -3  479.54   36.84
   2  -9   3  401.67   34.93
   3  -9   3   97.90   24.48
  -3   9  -3   76.71   13.71
   3  -9   3  110.36   17.45
   4  -9   3   17.46   21.50
   4  -9   3   43.23   17.11
   5  -9   3   82.48   20.27
   5  -9   3   69.37   24.64
   6  -9   3  166.64   38.51
   6  -9   3  125.81   20.72
   7  -9   3   -2.35   26.60
   8  -9   3   66.75   36.65
   9  -9   3   36.42   37.53
  10  -9   3   21.04   41.59
  10   8  -3  116.79   32.70
 -10  -8   3   74.48   31.91
  -9  -8   3    5.47   24.72
   9   8  -3   -3.41   18.25
  -8  -8   3   42.03   23.56
   8   8  -3   44.97   21.71
  -7  -8   3   15.88   17.67
   7   8  -3   -3.27   14.54
   6   8  -3  120.82   20.15
  -6  -8   3  167.97   23.90
   5   8  -3   86.99   20.58
   5   8  -3   56.57   16.52
   4   8  -3   45.97   16.62
   4   8  -3   44.70   13.88
   3   8  -3   -6.38   12.09
   3   8  -3   -3.37    8.70
   2   8  -3    6.56   14.49
   1   8  -3  166.22   20.71
   0   8  -3    9.66   11.22
  -1   8  -3   20.29   12.78
  -2   8  -3   41.09   12.06
   2  -8   3   39.85   14.39
  -3   8  -3  -13.15    7.84
   3  -8   3   -7.43    9.42
   3  -8   3  -14.23   12.17
   4  -8   3   30.01   14.35
   4  -8   3   20.29   16.83
   5  -8   3   38.08   15.42
   5  -8   3   13.31   19.67
   6  -8   3  173.38   33.69
   6  -8   3  156.36   22.12
   7  -8   3    1.45   24.94
   7  -8   3    3.80   15.88
   8  -8   3   47.67   32.53
   9  -8   3    5.50   31.57
  10  -8   3  104.90   48.04
 -10  -7   3   37.94   27.24
  10   7  -3    7.86   19.94
   9   7  -3   15.72   18.28
  -9  -7   3   32.44   23.95
  -8  -7   3  -20.46   19.22
   8   7  -3  -10.76   15.82
  -7  -7   3   38.20   20.42
   7   7  -3   41.72   18.73
   6   7  -3  198.92   23.47
  -6  -7   3  216.38   26.75
   5   7  -3    0.02   11.92
   4   7  -3  245.77   28.05
   4   7  -3  249.35   23.23
   3   7  -3   19.35   12.87
   3   7  -3   15.43    9.84
   2   7  -3  250.89   26.73
   1   7  -3  150.31   20.07
   0   7  -3 1753.35  120.02
  -1   7  -3   15.08    8.85
   2  -7   3  147.22   18.16
  -2   7  -3  109.68   14.52
   3  -7   3    2.47    9.19
  -3   7  -3  -11.08    6.40
   4  -7   3  653.42   46.79
   4  -7   3  613.15   61.95
   5  -7   3   89.52   26.28
   5  -7   3   99.51   19.32
   6  -7   3  110.12   22.24
   6  -7   3  119.12   30.54
   7  -7   3   17.42   16.45
   7  -7   3   -9.17   18.43
   8  -7   3   97.60   35.82
   8  -7   3   66.74   22.69
   9  -7   3   13.34   30.07
  11   6  -3   20.57   23.32
  10   6  -3   -8.62   20.66
   9   6  -3    3.25   15.30
  -9  -6   3   23.28   20.82
  -8  -6   3    4.49   18.66
   8   6  -3   18.65   17.02
   7   6  -3   11.13   14.97
  -7  -6   3    2.41   16.02
  -6  -6   3  117.93   20.24
   6   6  -3   87.95   16.10
   5   6  -3  372.12   33.35
  -5  -6   3  479.33   38.77
   4   6  -3   44.76   11.72
   4   6  -3   46.33   16.02
   3   6  -3    3.27    9.82
   3   6  -3   13.02    7.63
   2   6  -3  530.49   43.16
   1   6  -3 1782.65  122.21
   0   6  -3    8.14    8.32
  -1   6  -3 1133.04   83.76
   1  -6   3 1326.13   77.04
   2  -6   3   15.45    9.57
  -2   6  -3  -10.10    5.89
   3  -6   3  385.38   29.89
  -3   6  -3  326.77   26.76
   4  -6   3    9.51    9.98
   4  -6   3   -8.21   13.84
  -4   6  -3    7.14    6.63
   5  -6   3  272.84   26.83
   5  -6   3  271.07   36.92
   6  -6   3   22.80   19.26
   7  -6   3   11.46   15.57
   7  -6   3    7.69   23.00
   8  -6   3   54.36   29.47
   8  -6   3   38.01   20.22
   9  -6   3   96.91   24.89
   9  -6   3  100.81   40.85
  11   5  -3   78.98   29.98
  10   5  -3   -8.81   17.61
   9   5  -3   30.76   21.08
  -9  -5   3   43.77   22.00
  -8  -5   3   29.67   19.29
   8   5  -3   32.62   17.96
  -7  -5   3  227.31   29.71
   7   5  -3  303.02   29.77
  -6  -5   3   -2.48   12.45
   6   5  -3   -8.89    9.35
   5   5  -3  292.23   26.44
   4   5  -3   12.35   10.16
  -4  -5   3   -5.05   10.57
   3   5  -3  104.59   12.07
   3   5  -3  100.35   15.43
   2   5  -3   30.66   11.57
   2   5  -3   43.44    6.73
   1   5  -3  686.22   50.71
   0   5  -3  234.73   21.53
  -1   5  -3   45.33    9.39
   1  -5   3   50.11   10.68
  -2   5  -3    5.65    5.73
   2  -5   3   16.67    8.74
   3  -5   3   45.56   12.64
  -4   5  -3   16.88    7.49
   4  -5   3   11.52   10.11
   5  -5   3   71.06   22.28
   5  -5   3   77.50   16.40
   6  -5   3   -3.72   18.84
   7  -5   3   65.61   18.87
   7  -5   3   59.48   26.84
   8  -5   3   10.32   23.65
   8  -5   3    5.98   17.14
   9  -5   3   51.92   23.16
   9  -5   3   90.17   35.48
  10  -5   3   28.54   24.85
  11   4  -3   -3.43   18.04
  10   4  -3  -18.71   19.29
   9   4  -3   -6.75   15.12
  -9  -4   3    9.73   18.86
  -8  -4   3    3.50   15.98
   8   4  -3    4.30   14.11
   7   4  -3  124.60   23.54
  -7  -4   3   98.71   23.06
   6   4  -3  113.21   16.54
  -6  -4   3  116.52   18.36
   5   4  -3   66.27   14.58
  -5  -4   3   70.95   17.03
  -4  -4   3  182.53   19.57
   4   4  -3  169.77   17.14
   3   4  -3  260.50   20.77
   2   4  -3   31.63    5.67
   2   4  -3   28.13    8.97
   1   4  -3  952.93   66.44
   0   4  -3  523.41   38.11
   1  -4   3  211.65   18.57
  -1   4  -3  221.94   17.65
   2  -4   3   22.37    7.95
   3  -4   3  292.84   24.41
   5  -4   3  213.52   22.20
   5  -4   3  167.74   27.98
   6  -4   3  257.25   26.25
   6  -4   3  224.04   33.36
   7  -4   3   76.79   20.97
   7  -4   3   79.55   27.38
   8  -4   3   58.88   28.38
   8  -4   3   62.00   20.18
   9  -4   3   48.87   22.22
  10  -4   3  110.17   32.17
  11  -4   3    7.35   26.51
  11   3  -3  -15.45   18.55
  10   3  -3    2.01   17.27
   9   3  -3   27.95   20.13
  -9  -3   3   23.94   18.92
   8   3  -3   60.43   17.80
  -8  -3   3   55.96   22.64
   7   3  -3   20.19   14.09
  -7  -3   3   -9.12   15.89
   6   3  -3  177.60   20.25
  -6  -3   3  188.82   22.62
   5   3  -3    7.78    8.90
  -5  -3   3  -13.66    9.53
  -3  -3   3   31.18    9.77
   3   3  -3   39.80    8.57
  -2  -3   3  276.97   21.86
   2   3  -3  255.90   18.94
   1   3  -3    2.79    4.41
   0   3  -3 1157.11   77.19
   1  -3   3   96.20   11.21
   2  -3   3  527.03   36.43
   3  -3   3 1032.99   66.17
   4  -3   3  606.38   43.42
  -4   3  -3  598.80   45.33
  -5   3  -3   -9.04    9.28
   5  -3   3  -12.03   11.19
   5  -3   3   16.54   10.60
   6  -3   3  153.84   20.57
   6  -3   3  129.61   25.10
   7  -3   3  102.39   22.99
   7  -3   3   81.67   26.03
   8  -3   3  129.47   33.48
   8  -3   3  104.16   25.66
   9  -3   3   52.35   21.48
  10  -3   3   75.02   29.55
  11  -3   3   33.55   28.39
  11   2  -3   -8.97   20.94
  10   2  -3   68.70   22.97
   9   2  -3   -1.70   14.15
   8   2  -3  310.03   29.95
  -8  -2   3  278.26   32.69
   7   2  -3    2.40   12.04
  -7  -2   3    0.62   13.34
   6   2  -3  239.82   23.31
   6   2  -3  201.22   35.38
  -6  -2   3  212.45   24.05
   5   2  -3  315.80   40.09
   5   2  -3  325.96   26.93
  -5  -2   3  360.16   30.19
   4   2  -3  677.49   69.28
   4   2  -3  752.06   47.93
  -4  -2   3  735.41   53.15
  -3  -2   3  100.87   12.13
   3   2  -3   83.33   10.02
  -2  -2   3  122.46   12.31
   2   2  -3  123.49   10.45
  -1  -2   3  186.13   15.24
   0  -2   3   34.53    4.72
   1  -2   3   56.88    8.75
   2  -2   3  311.67   23.71
   3  -2   3   11.58    8.08
   4  -2   3  379.63   31.85
  -4   2  -3  448.06   30.27
   5  -2   3  100.44   15.77
   5  -2   3  103.35   19.48
   6  -2   3    0.27   13.47
   6  -2   3    8.45   11.52
   7  -2   3  -16.89   18.18
   7  -2   3   10.44   14.00
   8  -2   3   96.78   23.85
   9  -2   3   87.84   27.53
  10  -2   3   28.95   26.02
  11  -2   3   -5.90   25.37
  11   1  -3   12.47   22.01
  10   1  -3  -22.07   17.71
   9   1  -3  102.61   23.38
   8   1  -3   98.06   18.14
  -8  -1   3  128.74   28.28
  -7  -1   3  108.46   20.03
   7   1  -3   90.93   16.27
   6   1  -3   11.50   11.86
  -6  -1   3   -4.98   11.07
   5   1  -3  154.07   26.93
   5   1  -3  165.25   16.94
  -5  -1   3  164.24   18.62
   4   1  -3  155.14   15.03
  -4  -1   3  154.65   16.65
   4   1  -3  114.95   23.94
   3   1  -3    1.43   10.78
   3   1  -3   15.36    5.45
  -3  -1   3    8.78    6.96
   2   1  -3    9.46    3.73
  -2  -1   3    1.01    4.57
  -1  -1   3   64.80    7.25
   0  -1   3  219.75   16.03
   1  -1   3  182.50   14.82
   2  -1   3 6233.78  357.10
   3  -1   3  388.77   29.79
  -3   1  -3  386.26   27.00
   4  -1   3   52.81   14.15
  -4   1  -3   50.90    8.00
   5  -1   3   10.89   10.94
  -5   1  -3    9.71    6.46
   5  -1   3   -0.85   11.25
   6  -1   3   80.59   21.49
   6  -1   3   77.15   17.70
   7  -1   3   49.59   17.58
   7  -1   3   69.39   23.31
   8  -1   3   19.51   19.61
   9  -1   3   96.78   27.60
  10  -1   3   -1.68   23.60
  11  -1   3   37.55   29.28
  11   0  -3   -9.80   18.66
  10   0  -3   -7.46   17.90
   9   0  -3    0.91   16.15
   8   0  -3   19.33   14.92
  -8   0   3   12.09   21.31
  -7   0   3  179.28   24.27
   7   0  -3  185.87   35.44
   7   0  -3  207.70   22.44
   6   0  -3  -12.78    9.09
   5   0  -3   -0.13   13.39
  -5   0   3   12.28   11.21
   5   0  -3   20.39   10.12
   4   0  -3  -12.95   10.66
   4   0  -3   -6.43    5.42
   3   0  -3 1138.05   71.05
   3   0  -3 1231.10  102.15
   2   0  -3   -5.21    6.28
  -2   0   3   -1.36    3.53
   2   0  -3    0.88    2.30
  -1   0   3  482.17   34.11
   1   0   3 1877.90  110.26
   2   0   3   19.70    7.87
   4   0   3   -6.66    7.71
  -5   0  -3   90.36   11.07
   5   0   3   77.55   14.50
   5   0   3   89.57   15.92
   6   0   3  -10.54   10.38
  -6   0  -3    1.01    9.22
   6   0   3   -9.91   10.95
   7   0   3  334.61   36.86
   7   0   3  270.06   30.22
   8   0   3   20.53   18.79
   9   0   3   39.58   20.81
  10   0   3    7.77   21.73
  11   0   3   16.00   28.48
  11  -1  -3   17.68   18.58
  10  -1  -3   -3.49   18.03
   9  -1  -3  110.91   20.75
   8  -1  -3  108.30   19.93
  -8   1   3  135.53   28.84
  -7   1   3  108.64   21.67
   7  -1  -3  127.32   33.43
   7  -1  -3   94.55   15.88
  -6   1   3  -22.89   12.85
   6  -1  -3    7.37   10.14
   6  -1  -3  -16.78   18.55
  -5   1   3  158.79   19.81
   5  -1  -3  146.01   26.30
   5  -1  -3  185.14   17.30
   4  -1  -3  107.77   22.28
   4  -1  -3  153.25   14.40
  -4   1   3  108.04   16.99
   3  -1  -3    1.77    9.35
  -3   1   3   -6.55    7.05
   3  -1  -3   15.89    5.93
   2  -1  -3    8.49    3.45
   2  -1  -3   -1.98    6.86
  -2   1   3   10.84    5.64
  -1   1   3   69.27    8.63
   1  -1  -3   53.71   12.10
   0   1   3  240.48   15.91
   0   1   3  220.04   19.00
   1   1   3  267.11   19.02
   1   1   3  244.78   19.37
   2   1   3 8510.84  527.02
   2   1   3 9999.88  599.76
   3   1   3  470.79   34.95
   4   1   3   70.05   15.46
   4   1   3   44.73    9.25
   5   1   3   13.24   11.05
   5   1   3    9.93    8.98
   6   1   3  100.01   22.79
  -6  -1  -3   75.45   15.41
   6   1   3   79.80   19.57
   7   1   3   71.45   22.34
   8   1   3   12.35   15.87
   9   1   3   59.15   24.67
  10   1   3   -5.51   17.20
  11   1   3   48.63   28.62
  11  -2  -3    5.11   21.42
  10  -2  -3   77.62   23.61
   9  -2  -3   -4.47   15.04
   8  -2  -3  299.83   29.72
   8  -2  -3  320.53   47.31
   7  -2  -3   -6.81   11.84
   7  -2  -3  -29.58   20.10
  -7   2   3   -6.79   16.21
  -6   2   3  194.59   24.70
   6  -2  -3  244.26   21.84
   6  -2  -3  204.23   33.05
   5  -2  -3  347.89   26.92
   5  -2  -3  378.63   41.05
  -5   2   3  315.50   30.85
   4  -2  -3  624.22   58.25
   4  -2  -3  555.97   38.83
  -4   2   3  622.39   47.01
   3  -2  -3   56.94   14.16
  -3   2   3   85.51   11.87
   3  -2  -3   64.85    8.43
   2  -2  -3  100.06    8.62
  -2   2   3  126.65   14.26
   2  -2  -3  114.66   16.82
  -1   2   3  196.68   19.85
   0   2   3   36.67    7.23
   0  -2  -3   42.56   11.78
   1   2   3   76.70    8.60
   1   2   3   45.10    7.60
   2   2   3  640.82   42.65
   2   2   3  631.60   45.33
   3   2   3   -5.38    7.65
   3   2   3    0.98    7.12
   4   2   3  639.17   46.75
   5   2   3  119.42   18.35
   5   2   3  137.49   16.58
   5   2   3  112.40   16.28
   6   2   3   12.49   15.57
  -6  -2  -3   -3.79    9.89
   7   2   3    6.34   16.53
   8   2   3   92.43   23.77
   9   2   3   67.76   27.77
  10   2   3   16.14   23.63
  11   2   3   12.76   23.39
  10  -3  -3    3.13   14.24
   9  -3  -3   35.06   17.43
   8  -3  -3   98.83   34.64
   8  -3  -3   62.10   18.83
   7  -3  -3   29.06   13.84
   7  -3  -3   32.44   23.88
  -7   3   3   14.21   19.01
  -6   3   3  162.31   24.14
   6  -3  -3  152.40   17.74
   6  -3  -3  152.97   30.44
   5  -3  -3  -13.37   14.29
  -5   3   3    5.74   12.48
   5  -3  -3    2.44    7.63
   4  -3  -3 1013.32   87.21
  -4   3   3  992.70   72.73
   4  -3  -3  925.42   59.83
   3  -3  -3    6.22   10.11
  -3   3   3   21.59   11.07
   3  -3  -3   30.89    6.70
   2  -3  -3  176.15   21.73
   2  -3  -3  183.27   12.60
  -2   3   3  194.52   21.72
   1  -3  -3    3.59    5.99
  -1   3   3    9.58    8.18
   1   3   3  131.38   14.32
   1   3   3  161.95   13.48
   2   3   3 1007.23   73.35
   2   3   3 1115.09   66.99
   4   3   3  773.07   57.07
   4   3   3  805.21   55.77
   5   3   3    2.95   10.19
   5   3   3   -7.49    6.35
   5   3   3   -6.60   10.78
   6   3   3  106.65   19.32
   7   3   3   84.59   25.54
  -7  -3  -3   56.05   17.87
   8   3   3  116.23   30.25
   9   3   3   46.36   26.71
  10   3   3   55.08   31.56
  11   3   3   16.40   28.74
   9  -4  -3    8.92   29.82
   9  -4  -3    0.80   12.33
   8  -4  -3   29.95   27.49
   8  -4  -3   -6.71   12.80
   7  -4  -3  134.90   33.86
  -7   4   3   82.71   28.26
   7  -4  -3  112.72   20.00
   6  -4  -3  120.03   29.56
  -6   4   3   85.21   24.21
   6  -4  -3  112.58   14.71
  -5   4   3   80.47   21.01
   5  -4  -3   52.42   11.54
   5  -4  -3   66.16   23.25
   4  -4  -3  104.85   21.73
   4  -4  -3  117.37   11.60
   3  -4  -3  177.91   25.66
  -3   4   3  221.81   26.56
   3  -4  -3  189.11   14.52
   2  -4  -3   27.65   10.97
  -2   4   3   20.91   12.62
   2  -4  -3   18.14    3.41
   1   4   3  357.76   24.69
   1   4   3  341.49   28.51
   2   4   3   19.51    7.57
   2   4   3   32.52    9.84
   3   4   3  596.55   41.35
   3   4   3  521.51   43.00
   4   4   3  297.08   29.10
   4   4   3  355.47   29.28
   5   4   3  201.40   21.91
   5   4   3  215.79   25.14
   6   4   3  271.33   25.12
   6   4   3  178.12   25.63
  -7  -4  -3   84.33   20.30
   8   4   3   36.21   23.35
   9   4   3   47.38   28.30
  10   4   3   82.77   28.53
  11   4   3    7.71   25.64
   9  -5  -3   74.64   35.17
   8  -5  -3   31.24   28.25
   8  -5  -3   32.39   14.64
   7  -5  -3  253.53   39.47
   7  -5  -3  245.60   23.94
   6  -5  -3  -14.74   16.60
   6  -5  -3   -0.48    8.49
  -6   5   3  -19.72   17.00
   5  -5  -3  152.79   26.22
   5  -5  -3  179.40   15.92
  -5   5   3  145.68   26.54
   4  -5  -3    5.24    6.26
  -4   5   3   19.64   18.61
   4  -5  -3  -12.24   12.21
  -3   5   3   85.51   24.91
   3  -5  -3   68.58    7.68
   3  -5  -3   72.96   19.40
   2  -5  -3   34.10   12.31
  -2   5   3   30.56   14.41
  -1   5   3  686.87   51.37
   1  -5  -3  640.93   59.34
   0   5   3  182.95   18.76
   0  -5  -3  189.21   21.86
   1   5   3   48.84    7.71
   1   5   3   63.72   12.60
  -1  -5  -3   37.29   10.09
   2   5   3   23.66    9.55
   2   5   3   36.09   11.33
   3   5   3   64.99   15.53
   3   5   3   67.20   15.02
   4   5   3    1.43   10.70
   4   5   3  -12.38   11.24
   5   5   3  103.14   23.27
   5   5   3   81.37   15.88
   6   5   3   11.55   15.04
   6   5   3   -6.68   17.16
   7   5   3   94.81   26.75
   8   5   3   -8.52   19.12
   9   5   3   53.24   29.96
  10   5   3   -8.64   21.92
  11   5   3   24.63   28.87
   9  -6  -3   56.16   33.50
   8  -6  -3   28.32   27.97
   7  -6  -3   46.97   26.83
   6  -6  -3  104.11   13.96
  -6   6   3   96.15   30.75
   6  -6  -3  115.35   27.52
  -5   6   3  288.18   39.11
   5  -6  -3  321.77   23.69
   5  -6  -3  296.40   37.77
   4  -6  -3   11.25   16.75
  -4   6   3   35.84   23.68
   4  -6  -3   38.41    8.37
  -3   6   3    2.72   13.81
   3  -6  -3    8.55    4.34
   3  -6  -3  -14.63   11.34
  -2   6   3  430.75   39.44
   2  -6  -3  418.04   43.22
  -1   6   3 1459.87  106.73
   1  -6  -3 1586.97  127.68
   0  -6  -3   13.76    8.53
   0   6   3   14.69    9.22
   0   6   3    8.90    3.77
   1   6   3 1300.49   83.40
  -1  -6  -3 1384.43  115.43
   1   6   3 1495.59   98.08
   2   6   3   -1.15    7.07
   2   6   3    1.77   10.46
   3   6   3  603.08   50.27
   3   6   3  650.26   45.91
   4   6   3   -2.12   10.93
   4   6   3    6.20   12.88
   5   6   3  363.81   33.48
   5   6   3  319.96   33.17
   6   6   3   33.63   21.69
   6   6   3   30.61   17.78
   7   6   3  -16.17   20.97
   7   6   3   11.02   17.95
   8   6   3   19.22   26.34
  -8  -6  -3   32.86   21.33
   9   6   3   55.87   31.28
  10   6   3   31.48   27.68
  11   6   3  -36.52   27.77
  10  -7  -3   44.51   37.34
   9  -7  -3   72.18   35.42
   8  -7  -3  -17.26   24.96
  -6   7   3  146.14   39.84
   6  -7  -3  165.88   29.17
   5  -7  -3   -4.55   14.01
  -5   7   3    3.46   22.79
  -4   7   3  141.72   28.23
   4  -7  -3  150.44   26.37
   4  -7  -3  185.90   14.26
   3  -7  -3   15.92    4.67
   3  -7  -3  -11.52   13.00
  -3   7   3   10.96   15.02
  -2   7   3  154.04   22.41
   2  -7  -3  174.71   24.79
  -1   7   3  130.10   18.21
   1  -7  -3  105.64   21.69
   0  -7  -3 1624.02  144.81
   0   7   3 1754.82  100.98
   0   7   3 1886.69  122.18
  -1  -7  -3   14.61   10.51
   1   7   3   31.57   11.15
   1   7   3   22.70    8.10
   2   7   3  210.95   23.92
   2   7   3  184.67   19.22
  -2  -7  -3  194.97   21.84
   3   7   3   -2.11   12.04
   3   7   3  -10.79    9.67
   4   7   3  997.01   75.92
   4   7   3  994.70   69.03
   5   7   3  127.49   20.52
   5   7   3  101.42   20.31
   6   7   3   99.18   21.82
   6   7   3  145.38   28.88
   7   7   3   -5.80   16.30
   7   7   3  -18.18   16.93
   8   7   3   58.90   28.05
   9   7   3  -28.03   23.27
  10   7   3   29.82   30.05
  10  -8  -3  134.77   49.04
   9  -8  -3   39.50   34.22
   8  -8  -3   53.69   30.68
   7  -8  -3    4.56   24.91
   6  -8  -3  123.62   30.57
  -6   8   3  140.60   40.43
  -5   8   3   49.54   26.67
   5  -8  -3   63.48   23.48
   4  -8  -3   56.59   21.77
  -4   8   3   24.16   24.26
  -3   8   3    4.64   15.76
  -2   8   3   18.66   13.44
   2  -8  -3   -3.06   11.91
  -1   8   3  158.86   19.85
   1  -8  -3  151.14   24.23
   0   8   3   18.06   10.77
   0  -8  -3   -9.05   11.40
   1   8   3   42.99    9.89
   1   8   3   45.99   13.46
  -1  -8  -3   22.90   13.83
   2   8   3   45.65   12.55
  -2  -8  -3   37.08   11.98
   2   8   3   51.95   15.47
   3   8   3  -13.67    9.24
   3   8   3    4.83   14.73
   4   8   3   33.59   16.85
   4   8   3   44.69   15.46
   5   8   3   21.85   18.41
   5   8   3   30.72   18.95
   6   8   3  136.02   24.53
   6   8   3  143.48   24.74
   7   8   3  -15.87   18.93
   7   8   3   -0.51   18.64
   8   8   3   39.83   28.69
   9   8   3  -13.44   23.41
  10   8   3   36.75   30.63
  10  -9  -3   24.50   38.89
   9  -9  -3  123.44   45.49
   8  -9  -3   52.76   34.72
   7  -9  -3  165.86   36.82
   6  -9  -3   39.95   26.55
   5  -9  -3  135.79   29.46
  -5   9   3   97.41   33.78
   4  -9  -3  131.99   28.66
  -4   9   3   92.18   29.73
  -3   9   3    1.54   18.26
  -2   9   3  327.61   34.08
   2  -9  -3  304.36   36.81
  -1   9   3  199.73   24.34
   0   9   3  134.54   19.09
   0  -9  -3  103.83   22.68
   1   9   3   18.91   11.43
   1   9   3   20.38    8.23
   2   9   3  643.30   46.24
   2   9   3  680.32   55.64
   3   9   3  106.60   16.16
   3   9   3  105.59   20.86
   4   9   3   31.21   17.63
   4   9   3   56.94   22.97
   5   9   3   93.50   25.90
   5   9   3  101.36   25.14
   6   9   3  156.27   33.09
   6   9   3  150.15   28.62
   7   9   3  -12.13   18.94
   7   9   3  -10.68   20.23
   8   9   3   12.61   25.16
   8   9   3   52.78   24.49
   9   9   3  -34.40   29.34
  10   9   3  -23.94   26.14
  10 -10  -3   39.69   42.53
   9 -10  -3   33.77   38.46
   8 -10  -3   50.00   37.62
   7 -10  -3   68.64   35.52
   6 -10  -3   -0.95   23.75
   5 -10  -3   94.42   28.91
  -5  10   3  104.08   34.17
   4 -10  -3  133.04   28.95
  -4  10   3  183.44   32.37
   3 -10  -3  578.10   62.27
  -3  10   3  609.76   56.36
  -2  10   3   22.91   16.04
   2 -10  -3   -2.87   15.95
  -1  10   3  455.21   42.14
   1 -10  -3  450.59   48.44
   0  10   3   84.09   17.75
   0 -10  -3   49.04   21.23
   1  10   3  437.01   42.81
  -1 -10  -3  494.47   49.21
   1  10   3  560.45   34.56
   2  10   3   31.82   13.28
   2  10   3   41.53   19.84
  -2 -10  -3   19.95   11.68
   3  10   3  536.01   49.19
   3  10   3  465.27   40.12
   4  10   3   28.51   23.36
   4  10   3  -12.18   15.32
   5  10   3   76.34   22.56
   5  10   3  101.25   29.61
   6  10   3   69.06   28.29
   6  10   3   80.32   27.61
   7  10   3  169.49   30.40
   7  10   3  171.67   35.89
   8  10   3   27.27   26.39
   8  10   3  -31.73   25.04
   9  10   3  -44.82   25.81
  10  10   3  -34.80   33.18
  10 -11  -3   20.68   40.20
   9 -11  -3   68.44   40.41
   8 -11  -3   23.93   36.93
   7 -11  -3   24.22   32.19
   6 -11  -3   73.14   35.89
   5 -11  -3  112.46   29.36
  -5  11   3  128.03   39.66
   4 -11  -3   23.10   23.85
  -4  11   3   23.80   26.62
  -3  11   3   52.14   21.63
   3 -11  -3   45.33   22.12
   2 -11  -3   35.68   25.61
  -2  11   3  133.14   23.01
  -1  11   3  111.66   24.59
   1 -11  -3   46.08   22.74
   0 -11  -3  125.18   24.96
   0  11   3  163.52   23.79
  -1 -11  -3   11.27   15.59
   1  11   3   40.93   16.67
   2  11   3   93.41   17.67
   2  11   3  179.53   26.73
   3  11   3  252.96   27.67
   3  11   3  282.07   35.62
   4  11   3  199.46   32.35
   4  11   3  183.25   25.58
   5  11   3   76.60   29.39
   5  11   3   48.87   22.44
   6  11   3    6.47   25.93
   6  11   3   -8.82   17.57
   7  11   3  166.49   32.19
   7  11   3  133.09   33.90
   8  11   3  -27.90   27.42
   8  11   3   14.49   25.28
   9  11   3   12.32   34.49
   9 -12  -3   54.44   44.33
   8 -12  -3  163.31   51.57
   7 -12  -3   33.58   36.20
   6 -12  -3   69.69   32.38
   5 -12  -3   12.45   26.24
  -4  12   3  327.86   43.89
   4 -12  -3  332.56   45.93
   3 -12  -3  339.18   44.46
  -3  12   3  245.46   37.20
   2 -12  -3   -2.14   17.88
  -2  12   3    0.22   17.22
   1 -12  -3  -17.38   14.59
  -1  12   3    5.36   17.63
   0 -12  -3   66.58   25.01
   0  12   3  118.04   25.49
   1  12   3   95.56   24.39
  -1 -12  -3   44.10   19.33
   2  12   3   24.97   19.52
   2  12   3   18.21   15.02
   3  12   3  108.28   25.74
   3  12   3  121.21   28.66
   4  12   3   56.82   25.88
   4  12   3   48.60   20.56
   5  12   3    9.97   26.86
   5  12   3   -6.84   19.20
   6  12   3  -14.38   21.32
   6  12   3   -6.65   27.06
   7  12   3   61.97   28.98
   7  12   3  104.54   34.82
   8  12   3   82.61   36.65
   8  12   3   34.78   29.75
   9 -13  -3   62.26   48.03
   8 -13  -3   97.59   44.12
   7 -13  -3   14.26   31.99
   6 -13  -3  132.88   44.25
   5 -13  -3   33.97   30.23
  -4  13   3  189.31   41.84
   4 -13  -3  209.57   40.29
   3 -13  -3   27.11   25.50
  -3  13   3   37.83   27.42
  -2  13   3  344.56   40.99
   2 -13  -3  373.63   47.15
  -1  13   3   39.40   20.76
   1 -13  -3   -6.59   16.90
   0  13   3   91.71   25.35
   0 -13  -3   86.87   25.45
   1  13   3   18.54   20.98
   2  13   3  262.04   33.99
   3  13   3   36.36   26.29
   3  13   3   56.23   23.83
   4  13   3  130.67   37.08
   4  13   3  135.46   25.46
   5  13   3  -23.47   18.58
   5  13   3  -32.34   25.67
   6  13   3  145.27   34.36
   6  13   3  181.34   42.68
   7  13   3   20.99   32.58
   7  13   3   19.86   24.59
   8  13   3   98.83   38.05
   8  13   3   12.71   27.97
   9  13   3  -16.57   33.61
   8 -14  -3  140.96   54.52
   7 -14  -3   49.97   43.88
   6 -14  -3   62.16   36.08
   5 -14  -3    1.69   26.63
  -3  14   3  284.93   41.24
   3 -14  -3  332.31   48.13
  -2  14   3   40.15   24.80
   2 -14  -3   21.89   25.98
   1 -14  -3   36.21   24.48
  -1  14   3   62.12   26.77
   0 -14  -3   11.52   22.93
   0  14   3   24.29   24.09
   1  14   3  327.28   40.09
   2  14   3   46.10   27.50
   3  14   3   86.97   31.90
   4  14   3  -11.30   26.22
   5  14   3    2.65   31.07
   5  14   3   -2.98   25.49
   6  14   3  -11.33   30.31
   6  14   3   12.28   27.12
   7  14   3   46.98   28.18
   7  14   3  110.92   41.95
   8  14   3  -27.65   23.94
   8  14   3   -1.99   33.03
   9  14   3  -41.86   24.36
   8 -15  -3   25.24   45.91
   7 -15  -3   93.23   51.63
   6 -15  -3   21.16   36.23
   5 -15  -3   36.26   38.56
   4 -15  -3   13.33   33.19
  -3  15   3   64.99   30.53
   3 -15  -3   70.86   35.58
  -2  15   3   70.56   29.90
   2 -15  -3   55.43   30.15
   1 -15  -3  -11.14   23.61
  -1  15   3   24.75   25.17
   0  15   3   53.08   27.14
   1  15   3   -2.05   20.04
   2  15   3   43.45   28.24
   3  15   3    2.08   25.31
   4  15   3   74.73   33.73
   5  15   3   35.99   31.17
   6  15   3  -27.04   32.37
   7  15   3   85.15   43.14
   7  15   3   48.04   34.85
   8  15   3   -3.21   38.06
   8  15   3  -17.65   29.23
   7 -16  -3   66.73   45.52
   6 -16  -3   26.31   43.96
   5 -16  -3  151.01   51.17
   4 -16  -3  159.36   48.80
   3 -16  -3   39.55   35.36
  -3  16   3   32.59   34.27
   2 -16  -3   52.99   30.93
  -2  16   3   49.34   30.86
   1 -16  -3  210.21   36.77
  -1  16   3  181.99   34.52
   0  16   3   -7.73   25.19
   1  16   3  102.31   33.12
   2  16   3   -8.43   26.26
   3  16   3  106.42   35.76
   4  16   3    3.29   30.81
   5  16   3  118.05   43.58
   6  16   3  -18.19   37.87
   7  16   3   -1.00   39.42
   7 -17  -3   72.90   49.27
   6 -17  -3  131.71   55.94
   5 -17  -3   54.79   45.46
   4 -17  -3   37.60   41.06
   3 -17  -3   44.64   35.32
  -3  17   3    0.22   33.42
  -2  17   3  109.81   37.74
   2 -17  -3  133.67   40.60
  -1  17   3   73.23   35.31
   0  17   3  159.79   33.49
   1  17   3   37.91   30.02
   2  17   3   -1.62   28.90
   3  17   3    9.39   27.04
   4  17   3   56.31   37.65
   5  17   3  -18.30   35.09
   6  17   3   18.16   39.17
   7  17   3  -29.71   38.57
   6 -18  -3   77.86   55.64
   5 -18  -3   32.67   41.10
   4 -18  -3   48.45   42.16
   3 -18  -3  -10.80   32.42
   2 -18  -3   69.62   37.68
  -2  18   3   22.49   34.53
  -1  18   3   51.02   33.88
   0  18   3    5.18   28.76
   1  18   3   -2.26   29.44
   2  18   3  -16.37   29.14
   3  18   3  -33.41   30.16
   4  18   3  -36.74   33.09
   5  18   3    5.93   37.24
   6  18   3   16.02   45.25
   5 -19  -3   49.71   48.22
   4 -19  -3   79.88   42.52
   3 -19  -3   71.18   41.73
  -2  19   3   10.69   36.31
  -1  19   3   36.71   35.29
   0  19   3   59.42   36.56
   1  19   3  -22.33   29.26
   2  19   3  -28.40   31.65
   3  19   3  -40.13   31.93
   4  19   3   31.31   39.75
   5  19   3   11.13   40.31
   4 -20  -3   45.81   44.18
   3 -20  -3  114.43   44.96
  -2  20   3   10.77   38.58
  -1  20   3  131.99   46.52
   0  20   3    0.97   35.02
   1  20   3   12.57   35.79
   2  20   3  -15.14   34.57
   3  20   3   21.99   39.06
   4  20   3  -20.18   36.36
  -1  21   3  -39.07   38.63
   0  21   3  -16.16   37.03
   1  21   3  -17.41   36.50
   2  21   3  -33.23   35.93
   0  22   3  -22.01   39.78
   3  21  -4  -12.46   33.65
   2  21  -4   31.94   34.86
   1  21  -4    7.30   30.96
   4  20  -4    1.74   34.31
   3  20  -4  -11.80   30.15
   2  20  -4  -13.38   29.43
   1  20  -4    8.48   28.74
   0  20  -4   -4.09   27.73
   3 -20   4  -20.66   26.65
   4 -20   4   10.92   32.67
   5  19  -4  -22.82   34.36
   4  19  -4   22.31   35.61
   3  19  -4  -20.20   29.06
   2  19  -4  -43.89   26.34
   1  19  -4  -32.07   24.21
   0  19  -4   71.64   32.46
   2 -19   4    2.30   23.13
   3 -19   4  -16.22   25.80
   4 -19   4   22.85   33.62
   5 -19   4   27.18   37.72
   6  18  -4   19.86   38.22
   5  18  -4  122.03   42.22
   4  18  -4    6.96   32.01
   3  18  -4  -21.90   28.72
   2  18  -4  -11.18   27.07
   1  18  -4  109.86   33.66
   0  18  -4   22.96   25.79
   2 -18   4   19.93   25.18
   3 -18   4  -22.84   23.86
   4 -18   4    1.47   30.07
   5 -18   4   88.53   42.04
   6 -18   4   45.60   41.62
  -7 -17   4   -0.90   10.19
   6  17  -4   36.53   37.78
   5  17  -4   18.92   32.74
   4  17  -4   45.59   34.57
   3  17  -4    1.88   26.83
   2  17  -4    1.18   23.01
   1  17  -4   -4.82   22.99
   0  17  -4  131.70   33.27
   1 -17   4  101.59   25.99
  -1  17  -4  108.17   31.28
   2 -17   4  -13.20   20.52
   3 -17   4   24.88   28.79
   4 -17   4  -14.78   28.80
   5 -17   4   62.92   35.15
   6 -17   4   22.90   34.59
  -7 -16   4    7.20   12.20
   6  16  -4   14.23   33.66
   5  16  -4   10.54   31.49
   4  16  -4   -8.69   28.51
   3  16  -4   34.18   29.35
   2  16  -4  -16.45   23.39
   1  16  -4   16.71   24.81
   0  16  -4   12.40   20.74
   1 -16   4    9.80   22.31
  -1  16  -4   38.05   23.89
   2 -16   4  108.79   32.78
   3 -16   4   41.59   29.88
   4 -16   4   46.04   33.86
   5 -16   4   23.43   33.61
   6 -16   4  141.47   47.66
   7 -16   4    6.94   34.14
  -8 -15   4   32.80   19.00
  -7 -15   4   -7.46   12.15
   6  15  -4   85.57   35.92
   5  15  -4   -6.85   24.31
   4  15  -4   78.82   34.45
   3  15  -4   -5.63   24.56
   2  15  -4  166.28   30.92
   1  15  -4  136.65   31.67
   0  15  -4  154.62   28.53
   0 -15   4  163.78   27.83
  -1  15  -4   19.54   21.78
   1 -15   4    1.31   18.36
   2 -15   4  320.80   43.52
   3 -15   4   29.04   27.27
   4 -15   4   99.13   36.43
   5 -15   4   36.41   33.37
   6 -15   4   70.55   38.70
   7 -15   4   47.43   41.34
   8 -15   4   21.63   42.64
  -8 -14   4   28.28   19.18
  -7 -14   4   -1.37   13.67
   6  14  -4    3.69   28.75
   5  14  -4   24.37   30.62
   4  14  -4   42.91   31.18
   3  14  -4   36.23   28.88
   2  14  -4   38.78   22.50
   1  14  -4  143.54   32.36
   0  14  -4  -14.75   17.03
   1 -14   4  256.95   34.57
  -1  14  -4  171.63   27.22
  -2  14  -4   33.90   19.52
   2 -14   4   -6.39   21.61
   3 -14   4  133.82   36.11
   4 -14   4  -13.27   25.49
   5 -14   4   28.58   31.67
   6 -14   4   -1.61   30.70
   7 -14   4   21.25   30.98
   8 -14   4   61.11   43.39
   9  13  -4  -19.09   29.17
  -9 -13   4   17.03   23.36
  -8 -13   4   24.84   20.21
   8  13  -4   -6.24   24.15
  -7 -13   4   10.42   15.90
   6  13  -4   10.13   22.99
   5  13  -4  -36.31   23.30
   4  13  -4   10.89   26.31
   3  13  -4   -5.33   21.57
   2  13  -4  105.97   26.63
  -1 -13   4  225.14   27.11
   1  13  -4  187.68   28.76
   0 -13   4   15.71   14.29
   0  13  -4    0.73   17.99
   1 -13   4   55.49   20.97
  -1  13  -4   38.31   20.28
   2 -13   4    8.42   18.50
  -2  13  -4    1.63   15.42
   3 -13   4  193.83   32.45
   4 -13   4  -10.75   23.00
   5 -13   4   64.84   30.06
   6 -13   4   -3.36   28.66
   7 -13   4  141.11   43.71
   8 -13   4   38.70   34.55
   9 -13   4   90.90   47.85
   9  12  -4   -7.48   21.01
  -9 -12   4   14.29   24.48
  -8 -12   4   42.37   22.98
   8  12  -4   29.90   25.45
  -7 -12   4  104.30   22.08
   7  12  -4  139.04   31.65
   5  12  -4   90.00   32.16
   4  12  -4   78.83   29.79
   3  12  -4  406.48   44.46
   2  12  -4   28.01   20.00
   1  12  -4  133.07   23.80
   0  12  -4   -4.88   14.50
  -1  12  -4   75.96   20.50
   1 -12   4   82.31   22.51
  -2  12  -4    8.89   13.87
   2 -12   4   11.46   17.59
   2 -12   4   -7.38   11.99
   3 -12   4  240.65   37.13
   4 -12   4   22.12   25.32
   5 -12   4   29.82   29.04
   6 -12   4  -13.49   27.30
   7 -12   4   97.00   39.07
   8 -12   4   36.13   31.50
   9 -12   4  -13.66   37.54
  -9 -11   4   -3.76   24.80
   9  11  -4   -3.72   20.16
  -8 -11   4   54.68   25.57
   8  11  -4   46.44   27.82
  -7 -11   4    0.86   17.77
   7  11  -4    0.57   21.04
   6  11  -4  131.59   24.20
   5  11  -4   -1.77   22.21
   4  11  -4  140.45   32.33
   3  11  -4   -7.38   15.82
   2  11  -4  713.49   60.76
   1  11  -4   28.52   18.43
   0  11  -4   46.40   17.59
  -1  11  -4  -12.24   13.15
   2 -11   4  462.40   45.81
   2 -11   4  335.51   33.26
  -2  11  -4  406.72   36.31
   3 -11   4   20.25   14.36
   3 -11   4   15.47   19.70
   4 -11   4   98.17   30.02
   5 -11   4   71.32   29.50
   6 -11   4   -9.74   22.33
   7 -11   4  100.72   37.77
   8 -11   4   36.78   31.49
   9 -11   4   58.73   40.54
 -10 -10   4  -13.37   27.24
  10  10  -4  -30.26   26.10
  -9 -10   4   -5.48   23.72
   9  10  -4    6.00   19.02
   8  10  -4   56.81   26.20
  -8 -10   4   34.19   25.15
   7  10  -4  -16.88   17.98
  -7 -10   4    1.01   17.63
   6  10  -4   -5.40   14.92
  -6 -10   4   -6.46   14.43
   5  10  -4    1.36   14.22
   5  10  -4   13.26   21.48
   4  10  -4   11.98   20.57
   3  10  -4  123.60   22.72
   2  10  -4   58.30   20.91
   1  10  -4    7.65   15.86
   0  10  -4   60.38   18.49
  -1  10  -4   -8.02   12.08
  -2  10  -4   80.86   14.32
   2 -10   4   62.48   17.13
   3 -10   4   48.54   19.16
  -3  10  -4   26.16   13.43
   3 -10   4   50.01   21.73
   4 -10   4  326.39   31.74
   4 -10   4  336.62   43.21
   5 -10   4   61.16   25.02
   5 -10   4   93.37   21.93
   6 -10   4  196.94   37.55
   7 -10   4   20.07   29.81
   8 -10   4  191.72   48.41
   9 -10   4   -2.46   35.49
  10 -10   4   67.07   46.22
 -10  -9   4   18.19   31.34
  10   9  -4    6.37   24.08
  -9  -9   4   35.51   27.64
   9   9  -4   10.39   24.31
   8   9  -4    4.06   21.12
  -8  -9   4    6.71   20.35
  -7  -9   4  -10.26   18.06
   7   9  -4    4.46   15.02
  -6  -9   4   99.70   23.81
   6   9  -4  110.80   23.14
   5   9  -4   -3.90   10.34
   4   9  -4  106.28   24.23
   3   9  -4   53.83   20.60
   2   9  -4  149.01   22.16
   1   9  -4   94.93   19.00
   0   9  -4  611.75   49.65
  -1   9  -4   -9.80    9.64
   2  -9   4   27.66   13.99
  -2   9  -4   19.78   11.60
   3  -9   4  237.15   25.82
  -3   9  -4  181.32   20.39
   4  -9   4  217.17   33.86
   4  -9   4  232.96   27.04
   5  -9   4   87.29   27.43
   5  -9   4   69.71   20.78
   6  -9   4    2.64   15.31
   6  -9   4    0.26   23.40
   7  -9   4   64.88   31.63
   8  -9   4    3.94   30.02
   9  -9   4   69.59   40.12
  10  -9   4   20.41   41.26
 -10  -8   4   13.02   29.68
  10   8  -4    0.88   21.16
  -9  -8   4  155.75   35.07
   9   8  -4  125.93   32.16
   8   8  -4    7.05   19.89
  -8  -8   4  -12.21   18.05
  -7  -8   4  152.70   25.37
   7   8  -4  113.76   23.60
  -6  -8   4   15.45   16.64
   6   8  -4   15.85   16.70
  -5  -8   4  399.85   37.52
   5   8  -4  470.31   37.00
   4   8  -4  129.49   16.68
   4   8  -4  111.90   19.79
   3   8  -4  429.07   40.31
   2   8  -4  -12.25   12.73
   1   8  -4  441.27   38.85
   0   8  -4  278.38   27.17
  -1   8  -4  641.40   48.89
  -2   8  -4  141.48   17.28
   2  -8   4  165.32   20.15
  -3   8  -4  160.99   18.25
   3  -8   4  220.14   23.49
   4  -8   4   -8.82   11.79
   5  -8   4  140.65   26.11
   5  -8   4  148.01   21.48
   6  -8   4  246.74   38.45
   6  -8   4  250.45   28.67
   7  -8   4   -1.03   24.04
   7  -8   4    5.28   17.23
   8  -8   4   13.01   27.44
   9  -8   4    1.65   33.17
  10  -8   4   35.81   40.76
 -10  -7   4   15.46   24.07
  10   7  -4    6.74   24.42
  -9  -7   4   58.45   25.17
   9   7  -4   51.35   22.72
   8   7  -4   76.43   24.44
  -8  -7   4   83.66   25.99
  -7  -7   4  123.63   23.13
   7   7  -4  139.54   21.53
  -6  -7   4   55.11   18.97
   6   7  -4   25.63   13.94
   5   7  -4  224.68   23.51
  -5  -7   4  179.89   25.19
   4   7  -4   73.76   16.61
   3   7  -4   -4.35    9.70
   2   7  -4  -10.11   10.95
   1   7  -4  357.19   32.62
   0   7  -4  107.35   16.36
  -1   7  -4  328.19   27.99
   2  -7   4  226.34   23.55
  -2   7  -4  210.60   20.14
   3  -7   4   -3.90   10.15
  -3   7  -4    8.59    7.56
   4  -7   4   22.30   13.94
   5  -7   4  106.72   25.13
   5  -7   4  122.49   19.59
   6  -7   4    3.19   16.36
   6  -7   4    4.84   12.90
   7  -7   4  123.40   26.21
   7  -7   4  125.70   34.99
   8  -7   4   15.64   19.44
   8  -7   4  -21.89   24.53
   9  -7   4   12.19   34.08
   9  -7   4   19.88   23.19
  11   6  -4    5.46   20.49
 -10  -6   4   40.32   27.96
  10   6  -4    0.62   17.60
  -9  -6   4   12.18   20.90
   9   6  -4   -5.73   14.67
  -8  -6   4  -25.67   17.33
   8   6  -4   -4.22   14.04
  -7  -6   4   21.82   19.36
   7   6  -4   46.73   16.25
  -6  -6   4  100.45   19.51
   6   6  -4   92.53   17.72
   5   6  -4  169.74   19.86
  -5  -6   4  179.32   23.73
   4   6  -4  180.56   17.99
  -4  -6   4  138.31   18.54
   3   6  -4   46.60   10.53
   3   6  -4   19.84   11.96
   2   6  -4    5.01   11.04
   1   6  -4 1950.31  133.15
   0   6  -4  115.18   15.05
  -1   6  -4   41.67   12.31
   1  -6   4   81.68   12.08
  -2   6  -4  583.95   42.89
   2  -6   4  611.91   44.50
  -3   6  -4   81.28   10.95
   3  -6   4  126.23   16.76
   4  -6   4  100.57   17.56
   5  -6   4  108.96   22.72
   5  -6   4  128.77   18.30
   6  -6   4  343.37   43.44
   6  -6   4  355.96   33.41
   7  -6   4   31.10   25.22
   7  -6   4   26.81   18.78
   8  -6   4  145.12   40.19
   8  -6   4  124.52   27.90
   9  -6   4   -7.65   32.44
   9  -6   4   -1.84   16.91
  10  -6   4  128.15   34.22
  11   5  -4    9.71   20.92
  10   5  -4   16.88   20.94
   9   5  -4   -4.29   16.03
  -9  -5   4    2.62   17.90
  -8  -5   4   11.53   19.49
   8   5  -4   19.67   15.20
   7   5  -4   27.16   14.47
  -7  -5   4   23.75   18.75
   6   5  -4  160.11   19.45
  -6  -5   4  178.12   23.14
  -5  -5   4   -9.06   11.44
   5   5  -4    7.50    9.73
   4   5  -4 1200.10   79.21
  -4  -5   4 1334.48   89.72
   3   5  -4    1.15    6.02
   2   5  -4  341.60   29.80
   1   5  -4  122.34   15.53
   0   5  -4 2488.74  165.33
  -1   5  -4   86.18   11.77
   1  -5   4  117.06   13.88
   2  -5   4   57.49   13.84
  -2   5  -4   31.59    7.83
   3  -5   4  109.08   15.83
   4  -5   4  254.74   24.42
   5  -5   4    1.70   10.19
   6  -5   4  153.79   28.30
   6  -5   4  142.27   20.29
   7  -5   4    3.86   21.06
   8  -5   4    6.86   17.52
   8  -5   4   -6.79   22.15
   9  -5   4   16.06   18.54
   9  -5   4    9.28   31.51
  10  -5   4    8.04   20.61
  11  -5   4   30.40   29.11
  11   4  -4   21.35   22.91
  10   4  -4   26.26   18.30
   9   4  -4   26.74   17.04
  -9  -4   4   33.21   20.57
  -8  -4   4   23.52   18.35
   8   4  -4   33.99   17.92
   7   4  -4    3.40   10.69
  -7  -4   4  -10.53   14.99
   6   4  -4   20.83   11.67
  -6  -4   4   28.31   14.90
  -5  -4   4  685.54   50.96
   5   4  -4  605.01   44.88
   4   4  -4   71.06   11.18
  -4  -4   4   55.78   13.46
   3   4  -4  182.66   16.42
  -3  -4   4  195.85   19.51
  -2  -4   4  107.06   13.02
   0   4  -4   24.18    7.06
   1  -4   4  267.29   23.12
   2  -4   4  103.57   13.84
   3  -4   4   68.81   13.71
   4  -4   4  190.98   20.79
   5  -4   4  161.84   20.92
   6  -4   4  140.67   27.11
   7  -4   4  -12.36   18.49
   7  -4   4    6.42   16.22
   8  -4   4  163.52   34.55
   8  -4   4  116.25   25.65
   9  -4   4   14.51   18.91
  10  -4   4   75.18   26.99
  11  -4   4   12.46   22.78
  11   3  -4   43.03   24.93
  10   3  -4  -12.09   16.17
  -9  -3   4   15.30   21.17
   9   3  -4   12.81   17.38
  -8  -3   4   85.39   24.25
   8   3  -4   93.41   21.09
  -7  -3   4   59.32   19.26
   7   3  -4   94.41   19.66
  -6  -3   4  -10.09   10.21
   6   3  -4   -6.51    8.26
  -5  -3   4  200.20   23.30
   5   3  -4  222.14   20.32
  -4  -3   4   10.81    8.30
   4   3  -4   11.35    7.89
   3   3  -4  238.82   18.06
  -3  -3   4  192.51   19.53
  -2  -3   4  407.09   31.18
  -1  -3   4   93.73   10.59
   0  -3   4    7.91    4.04
   1  -3   4   15.07    7.33
   1  -3   4    9.53    3.51
   2  -3   4  427.91   32.02
   3  -3   4  112.72   15.19
   4  -3   4  123.56   16.61
   5  -3   4  280.81   26.83
   6  -3   4    3.61   16.27
   6  -3   4    7.80   12.31
   7  -3   4  260.09   35.91
   7  -3   4  235.82   27.62
   8  -3   4   -2.12   22.29
   8  -3   4    9.87   18.31
   9  -3   4  145.42   26.91
  10  -3   4   14.47   22.67
  11  -3   4   32.62   24.09
  11   2  -4    7.77   21.76
  10   2  -4   -0.36   17.52
   9   2  -4    6.47   13.21
  -9  -2   4   35.01   23.53
  -8  -2   4   -2.87   16.71
   8   2  -4   11.99   12.00
   7   2  -4  356.72   31.09
  -7  -2   4  371.03   36.09
   6   2  -4   47.76   12.65
  -6  -2   4   22.59   14.57
   6   2  -4   33.88   23.77
   5   2  -4  177.52   31.82
  -5  -2   4  159.76   20.06
   5   2  -4  182.45   18.21
  -4  -2   4  161.66   19.56
   4   2  -4  198.99   17.06
  -3  -2   4 1127.60   82.54
   3   2  -4 1276.20   73.16
  -2  -2   4    1.36    4.76
  -1  -2   4  304.20   23.46
   0  -2   4    6.09    3.88
   1  -2   4  179.20   16.44
   2  -2   4   98.32   12.05
   3  -2   4 1023.67   66.20
  -5   2  -4   50.56   10.49
   5  -2   4   71.53   16.38
   6  -2   4  124.58   22.38
   6  -2   4  106.72   17.68
   7  -2   4  106.42   19.77
   7  -2   4  128.31   25.51
   8  -2   4   37.98   18.74
   9  -2   4   13.23   20.90
  10  -2   4   64.19   25.81
  11  -2   4  -10.48   20.76
  11   1  -4   -8.89   19.95
  10   1  -4   14.88   19.52
   9   1  -4    8.89   13.38
  -8  -1   4  165.75   28.07
   8   1  -4  162.21   21.26
   7   1  -4    8.02    9.97
  -7  -1   4  -24.60   14.64
   6   1  -4  226.62   36.22
  -6  -1   4  223.00   25.22
   6   1  -4  246.32   22.70
   5   1  -4   -2.01   13.18
   5   1  -4    0.44    7.49
  -4  -1   4  748.65   53.74
   4   1  -4  697.66   69.71
  -3  -1   4   60.36   10.66
   3   1  -4   79.70    9.37
   2   1  -4  374.09   23.04
  -2  -1   4  327.62   26.72
  -1  -1   4  815.37   55.95
   0  -1   4   22.35    4.72
   1  -1   4   44.46    7.43
   2  -1   4  276.85   22.55
   3  -1   4  915.64   60.08
  -4   1  -4  226.90   17.55
   4  -1   4  212.81   21.95
   5  -1   4  118.19   17.64
  -5   1  -4  140.67   13.91
   6  -1   4  110.20   20.31
   6  -1   4  104.47   17.96
   7  -1   4  145.00   22.35
   7  -1   4  143.56   27.08
   8  -1   4   30.12   19.01
   9  -1   4  128.18   28.84
  10  -1   4   18.13   20.45
  11  -1   4    6.36   23.08
  11   0  -4   -7.90   19.32
  10   0  -4   38.48   20.60
   9   0  -4  -16.39   11.90
  -8   0   4  318.84   38.63
   8   0  -4  326.67   30.53
   7   0  -4   -6.55   22.52
  -7   0   4  -16.52   13.08
   7   0  -4   -4.95    9.68
   6   0  -4   17.18   22.35
  -6   0   4    8.06   12.81
   6   0  -4   30.49   11.19
   5   0  -4   -7.75    6.20
   4   0  -4  148.85   26.25
   4   0  -4  167.91   14.97
  -4   0   4  123.16   17.22
   3   0  -4   -6.86    8.88
   3   0  -4   -1.67    4.11
  -3   0   4   -1.85    6.22
   2   0  -4  181.90   13.49
  -2   0   4  199.30   17.34
   2   0  -4  194.43   27.71
  -1   0   4   -2.08    4.02
   0   0   4  570.01   40.74
   1   0   4    2.81    4.29
   1   0   4    1.44    4.62
   2   0   4 3654.89  228.09
   2   0   4 4219.33  256.83
   3   0   4    4.91    9.46
   3   0   4    4.41    5.75
   4   0   4  336.36   29.05
   4   0   4  339.30   25.65
   5   0   4   -9.35    9.38
  -5   0  -4   -3.72    5.32
   6   0   4   13.10   12.65
   6   0   4    0.74   10.54
   7   0   4   -0.06   13.39
   8   0   4  206.56   29.02
   9   0   4   13.48   20.50
  10   0   4   54.36   28.98
  11   0   4   -8.49   25.35
  11  -1  -4    1.59   17.10
  10  -1  -4   12.18   16.15
   9  -1  -4   24.83   14.97
  -8   1   4  140.97   28.60
   8  -1  -4  174.03   22.12
   7  -1  -4   -2.14   21.72
  -7   1   4  -12.46   14.59
   7  -1  -4    7.97   11.98
   6  -1  -4  212.96   20.50
  -6   1   4  219.71   25.28
   6  -1  -4  218.57   35.07
   5  -1  -4   -0.74    6.33
  -5   1   4  -12.88    9.85
  -4   1   4  783.91   57.53
   4  -1  -4  768.95   73.37
   4  -1  -4  783.22   49.45
  -3   1   4   54.31   10.72
   3  -1  -4   64.25    7.81
   3  -1  -4   62.45   17.93
  -2   1   4  421.16   29.95
   2  -1  -4  364.95   23.27
   2  -1  -4  328.56   37.68
  -1   1   4  593.40   43.67
   0   1   4   26.98    5.55
   0   1   4   29.68    8.56
   1   1   4   58.75    7.90
   1   1   4   54.17    7.86
   2   1   4  411.94   32.15
   2   1   4  489.53   33.23
   3   1   4 1049.23   65.60
   3   1   4  863.48   62.26
   4   1   4  350.85   30.90
   5   1   4  111.75   17.47
   6   1   4  106.98   19.28
   6   1   4   99.99   18.41
  -6  -1  -4   99.71   14.70
   7   1   4  161.95   25.34
   8   1   4   10.23   19.54
   9   1   4  159.00   34.29
  10   1   4    1.08   20.76
  11   1   4   20.90   28.89
  10  -2  -4   -4.33   13.53
   9  -2  -4   14.08   13.93
   8  -2  -4   16.33   27.04
   8  -2  -4    7.49   13.97
  -8   2   4  -15.46   25.22
  -7   2   4  357.41   38.85
   7  -2  -4  363.68   30.52
   7  -2  -4  366.20   48.54
   6  -2  -4   41.66   11.98
   6  -2  -4    6.64   21.53
  -6   2   4   36.26   16.21
   5  -2  -4  144.67   15.62
  -5   2   4  170.61   20.68
   5  -2  -4  132.48   27.03
  -4   2   4  137.48   18.13
   4  -2  -4  152.71   13.97
   4  -2  -4  138.56   25.28
   3  -2  -4 1140.12   65.50
   3  -2  -4 1050.93   95.60
   2  -2  -4    4.33    2.32
  -2   2   4    3.00    6.38
   2  -2  -4    6.96    8.02
   1  -2  -4  295.33   33.97
  -1   2   4  350.51   29.44
   0   2   4    6.89    3.76
   0   2   4   17.10    7.96
   1   2   4  213.40   19.26
   1   2   4  249.46   18.81
   2   2   4  195.57   18.79
   2   2   4  234.04   20.13
   3   2   4 1951.56  114.60
   3   2   4 1764.79  124.07
   4   2   4    3.56    8.64
   4   2   4   -0.23   11.41
   5   2   4   74.00   14.61
   5   2   4   71.38   18.56
   6   2   4  128.03   20.85
   7   2   4  126.07   27.04
   8   2   4   27.04   21.53
   9   2   4   -3.18   18.49
  10   2   4   59.80   29.66
  11   2   4   -8.39   22.96
   9  -3  -4   33.71   16.74
   8  -3  -4   82.05   19.73
   8  -3  -4   95.33   36.87
   7  -3  -4   88.54   17.33
  -7   3   4   77.01   26.59
   7  -3  -4   62.19   30.22
   6  -3  -4   -5.30    8.35
  -6   3   4   -2.19   14.24
  -5   3   4  192.89   23.89
   5  -3  -4  176.53   16.76
   5  -3  -4  168.09   29.80
   4  -3  -4   -0.19    6.47
   4  -3  -4   -7.19   13.45
  -4   3   4   20.46   12.38
   3  -3  -4  197.46   13.56
  -3   3   4  155.32   21.14
   3  -3  -4  158.13   24.56
   2  -3  -4  318.38   34.60
  -2   3   4  323.62   31.09
  -1   3   4  132.12   18.00
   0  -3  -4    5.84    8.69
   0   3   4    8.35    7.43
   0   3   4    4.61    3.82
   1   3   4   25.53    7.71
   1   3   4   25.15    7.68
   2   3   4  866.75   56.77
   3   3   4  189.29   19.87
   3   3   4  197.57   21.44
   4   3   4  164.98   18.04
   4   3   4  139.05   19.62
   5   3   4  294.23   31.28
   5   3   4  389.41   30.16
   6   3   4    1.94   11.39
   6   3   4    7.11   15.14
   7   3   4  348.23   37.54
   8   3   4   -8.31   18.03
   9   3   4  128.70   30.89
  10   3   4   -0.68   19.03
  11   3   4   39.11   32.23
   9  -4  -4   54.13   34.23
   8  -4  -4   23.78   12.15
   8  -4  -4    6.90   26.14
   7  -4  -4   17.04   12.66
   7  -4  -4    8.52   25.00
  -7   4   4    7.24   22.06
   6  -4  -4   21.35   10.32
   6  -4  -4   -4.25   18.44
  -6   4   4   10.36   17.02
   5  -4  -4  494.98   34.71
   5  -4  -4  526.13   54.94
  -5   4   4  515.44   46.96
   4  -4  -4   52.82    8.24
   4  -4  -4   66.04   22.79
  -4   4   4   58.04   18.43
  -3   4   4  120.97   20.94
   3  -4  -4  121.83   22.80
  -2   4   4   92.61   17.99
   2  -4  -4   69.12   16.02
   0  -4  -4   26.03   11.15
   0   4   4   38.17    7.33
   0   4   4   47.17   11.22
   1   4   4  347.78   24.99
   1   4   4  328.69   28.05
   2   4   4  177.02   19.59
   2   4   4  208.45   19.14
   3   4   4   64.60   13.49
   3   4   4   72.87   13.40
   4   4   4  216.25   23.99
   4   4   4  265.16   26.17
   5   4   4  180.35   20.89
   5   4   4  189.74   24.14
   6   4   4  100.84   25.06
   6   4   4   96.06   17.66
   7   4   4   -8.64   16.71
   8   4   4  138.78   30.90
   9   4   4   10.93   21.74
  10   4   4   38.48   26.37
  11   4   4   21.86   27.49
   9  -5  -4   12.65   30.59
   8  -5  -4   21.64   26.28
  -7   5   4   18.77   24.98
   7  -5  -4   41.81   25.49
  -6   5   4  144.10   30.88
   6  -5  -4  135.19   28.83
   6  -5  -4  120.96   14.99
  -5   5   4   -1.63   19.05
   5  -5  -4   -1.02    5.96
  -4   5   4  894.16   76.28
   4  -5  -4  968.19   85.50
   4  -5  -4  908.59   56.13
   3  -5  -4   -2.44    3.31
  -3   5   4  -13.10   14.29
  -2   5   4  358.62   34.84
   2  -5  -4  273.38   34.87
  -1   5   4  127.74   18.94
   1  -5  -4  143.00   21.22
   0   5   4 2944.46  188.08
   0  -5  -4 2650.56  226.95
   1   5   4  130.60   16.11
   1   5   4  126.69   13.02
   2   5   4   65.79   10.76
   2   5   4   58.60   12.73
   3   5   4  128.01   19.26
   3   5   4  174.43   18.94
   4   5   4  374.19   33.54
   4   5   4  366.24   33.71
   5   5   4   -2.18   11.27
   5   5   4  -11.44   12.89
   6   5   4  154.43   25.34
   6   5   4  182.91   22.11
   7   5   4    5.21   16.84
   7   5   4  -13.66   18.52
   8   5   4   -8.60   22.74
   9   5   4   -9.81   19.53
  10   5   4   -0.94   24.21
  11   5   4  -28.24   25.77
   9  -6  -4   35.24   31.50
   8  -6  -4    2.65   23.82
   7  -6  -4   40.46   28.34
  -6   6   4   78.93   29.69
   6  -6  -4  104.70   28.34
   5  -6  -4  157.80   15.63
   5  -6  -4  219.55   32.17
  -5   6   4  110.57   30.59
  -4   6   4   96.66   27.40
   4  -6  -4   93.70   21.47
   3  -6  -4  -16.31   15.80
  -3   6   4   27.33   19.67
  -2   6   4   11.19   14.49
   2  -6  -4    5.84   13.00
  -1   6   4 1840.89  122.95
   1  -6  -4 1634.56  145.10
   0   6   4  130.19   16.22
   0   6   4   87.53    9.38
   0  -6  -4   88.78   17.38
  -1  -6  -4   57.32   14.13
   1   6   4   77.39   14.35
   1   6   4   62.26   10.16
   2   6   4  857.87   66.96
   2   6   4  945.50   59.72
   3   6   4  189.84   23.97
   3   6   4  211.73   22.67
   4   6   4  172.21   21.44
   4   6   4  147.63   21.53
   5   6   4  171.08   22.82
   5   6   4  183.66   25.98
   6   6   4  487.25   45.19
   6   6   4  407.83   40.04
   7   6   4   35.63   19.68
   7   6   4   -2.50   23.12
   8   6   4   84.75   30.63
   9   6   4  -12.58   18.93
  10   6   4   63.81   33.03
  10  -7  -4   60.31   40.18
   9  -7  -4   88.58   37.74
   8  -7  -4   78.76   31.16
   7  -7  -4  165.81   34.58
   6  -7  -4   36.54   21.62
  -6   7   4   42.95   28.54
   5  -7  -4  151.98   29.57
  -5   7   4  167.33   38.86
   4  -7  -4   44.22   20.62
  -4   7   4   85.64   30.91
  -3   7   4   -2.06   16.66
   3  -7  -4   10.25    3.20
  -2   7   4   -9.15   12.26
   1  -7  -4  300.87   32.03
  -1   7   4  200.42   25.07
   0   7   4  112.46   10.01
   0  -7  -4   90.36   19.39
   0   7   4  146.82   17.60
   1   7   4  419.22   36.29
   1   7   4  400.92   29.17
  -1  -7  -4  396.34   40.14
   2   7   4  364.10   33.00
   2   7   4  312.48   27.64
   3   7   4   -9.61   12.13
   3   7   4    8.34   12.85
   4   7   4    4.88   15.14
   4   7   4   17.89   15.59
   5   7   4  129.07   21.91
   5   7   4  122.60   21.16
   6   7   4  -15.48   16.96
   6   7   4    4.36   18.28
   7   7   4  134.41   34.64
   7   7   4  110.05   21.79
   8   7   4  -31.39   22.31
   9   7   4   -2.31   29.39
  10   7   4  -24.03   26.00
  10  -8  -4   47.55   40.24
   9  -8  -4  157.69   45.25
   8  -8  -4   20.67   30.55
   7  -8  -4  126.46   32.64
  -6   8   4   28.44   31.63
   6  -8  -4   15.50   23.18
  -5   8   4  303.06   43.76
   5  -8  -4  354.27   42.80
   4  -8  -4  143.34   30.10
  -4   8   4   73.17   29.79
  -3   8   4  419.08   44.76
   3  -8  -4  354.60   43.67
  -2   8   4    8.64   12.88
   2  -8  -4  -10.17    9.60
   1  -8  -4  419.94   42.21
  -1   8   4  326.55   34.08
   0   8   4  302.83   29.11
   0   8   4  287.88   18.43
   0  -8  -4  250.03   31.64
  -1  -8  -4  645.02   60.78
   1   8   4  677.17   52.86
   2   8   4  234.45   26.09
   2   8   4  227.84   22.87
   3   8   4  283.70   30.71
   3   8   4  259.07   26.15
   4   8   4   -0.30   11.93
   4   8   4   26.69   19.40
   5   8   4  201.04   28.38
   5   8   4  203.84   26.75
   6   8   4  189.01   28.15
   6   8   4  180.23   28.58
   7   8   4  -15.31   16.79
   7   8   4   -0.32   20.69
   8   8   4  -37.48   19.42
   9   8   4  -18.26   25.92
  10   8   4    2.49   28.97
  10  -9  -4   37.89   38.68
   9  -9  -4   62.47   39.27
   8  -9  -4   22.31   30.79
   7  -9  -4   12.61   27.01
   6  -9  -4   98.09   30.34
  -6   9   4   86.57   38.98
  -5   9   4   17.77   27.88
   5  -9  -4   -3.04   15.57
  -4   9   4   90.61   31.52
   4  -9  -4   93.07   23.97
  -3   9   4   19.13   21.42
   3  -9  -4   28.31   20.16
   2  -9  -4  137.51   27.28
  -2   9   4  218.50   28.15
   1  -9  -4   75.23   23.06
  -1   9   4  108.06   19.62
   0   9   4  502.26   43.00
   0  -9  -4  474.14   49.48
  -1  -9  -4   -7.13   10.56
   1   9   4   -3.19    7.70
   1   9   4    8.71   13.14
  -2  -9  -4   31.12   13.72
   2   9   4   26.81   13.66
   2   9   4   68.64   19.54
   3   9   4  343.39   36.58
   3   9   4  305.82   30.10
   4   9   4  325.42   37.34
   4   9   4  320.76   32.83
   5   9   4   80.20   22.58
   5   9   4   80.86   25.02
   6   9   4  -20.11   20.31
   6   9   4    6.44   22.09
   7   9   4   21.47   23.48
   7   9   4   16.17   22.73
   8   9   4   -4.20   21.22
   8   9   4  -33.71   23.99
   9   9   4   15.22   34.70
  10   9   4   -6.04   28.66
  10 -10  -4   51.95   43.39
   9 -10  -4   38.98   34.73
   8 -10  -4   69.02   39.46
   7 -10  -4   18.48   31.48
   6 -10  -4    7.55   22.74
   5 -10  -4   17.22   23.04
  -5  10   4   29.46   31.30
   4 -10  -4   27.19   19.79
  -4  10   4   30.87   27.43
   3 -10  -4  138.16   29.42
  -3  10   4  115.21   30.10
   2 -10  -4   48.28   21.74
  -2  10   4   49.51   20.92
   1 -10  -4    0.26   16.34
  -1  10   4   45.42   18.60
   0 -10  -4   35.06   17.32
   0  10   4   34.91   16.07
   1  10   4    5.01   13.93
   1  10   4   -6.89    8.62
   2  10   4  127.74   22.20
  -2 -10  -4   91.98   17.83
   2  10   4   90.08   16.11
   3  10   4   35.36   17.92
   3  10   4   67.76   23.76
   4  10   4  479.70   47.34
   4  10   4  409.85   39.03
   5  10   4  103.63   30.46
   5  10   4  119.20   26.10
   6  10   4  236.99   33.91
   6  10   4  236.56   35.26
   7  10   4   50.25   27.25
   7  10   4    7.26   27.16
   8  10   4  161.89   43.00
   8  10   4  178.48   32.15
   9  10   4  -27.64   28.20
  10  10   4   24.93   40.15
  10 -11  -4   45.69   44.75
   9 -11  -4   33.28   38.95
   8 -11  -4  114.14   44.52
   7 -11  -4   13.00   31.96
   6 -11  -4  153.75   34.87
   5 -11  -4   12.98   20.62
  -5  11   4   13.45   26.58
   4 -11  -4  149.36   36.43
  -4  11   4  143.30   38.64
   3 -11  -4    4.98   20.08
  -3  11   4    5.35   20.52
  -2  11   4  600.73   55.80
   2 -11  -4  591.98   62.79
  -1  11   4   52.07   20.70
   1 -11  -4    1.04   16.39
   0  11   4   38.25   16.64
   0 -11  -4    9.53   16.17
   1  11   4   -1.46   14.36
   2  11   4  649.11   47.48
   2  11   4  609.39   55.78
   3  11   4   29.84   19.27
   3  11   4    2.29   15.40
   4  11   4  116.54   26.47
   4  11   4  110.90   30.40
   5  11   4   81.93   31.00
   5  11   4   52.56   24.33
   6  11   4    9.16   26.87
   6  11   4   -8.96   18.65
   7  11   4   24.61   29.41
   7  11   4   66.13   31.27
   8  11   4   22.40   29.41
   8  11   4  -13.07   26.10
   9  11   4  -25.18   34.37
   9 -12  -4   49.17   43.01
   8 -12  -4  155.72   50.52
   7 -12  -4  189.36   50.30
   6 -12  -4   23.35   30.24
  -5  12   4   63.38   33.82
   5 -12  -4   83.30   30.95
  -4  12   4   87.86   32.50
   4 -12  -4  221.73   37.73
   3 -12  -4  354.67   45.45
  -3  12   4  345.49   43.46
   2 -12  -4    0.59   14.89
  -2  12   4   20.14   20.04
  -1  12   4  121.42   24.92
   1 -12  -4  110.44   25.60
   0  12   4   -8.06   16.19
  -1 -12  -4   51.50   20.65
   1  12   4  111.36   25.36
   2  12   4   16.88   19.35
   3  12   4  284.11   30.59
   3  12   4  247.34   34.17
   4  12   4   49.16   28.43
   4  12   4   45.69   21.39
   5  12   4   45.12   30.29
   5  12   4   24.61   23.22
   6  12   4  -14.19   26.68
   6  12   4  -21.92   20.70
   7  12   4   84.98   36.75
   7  12   4   63.51   32.79
   8  12   4  -22.23   25.44
   8  12   4   24.18   33.07
   9  12   4  -47.04   28.00
   9 -13  -4   49.15   41.79
   8 -13  -4   85.70   44.66
   7 -13  -4   13.46   32.97
   6 -13  -4   40.00   33.32
   5 -13  -4    2.98   29.02
  -4  13   4   62.22   34.89
   4 -13  -4   78.99   32.84
   3 -13  -4    6.89   23.74
  -3  13   4   25.13   25.39
   2 -13  -4  262.03   39.21
  -2  13   4  186.08   34.92
  -1  13   4  205.01   31.14
   1 -13  -4  206.51   33.64
   0 -13  -4    8.03   16.80
   0  13   4    0.24   14.47
   1  13   4   47.01   23.39
   2  13   4   13.43   22.31
   3  13   4  218.49   32.75
   4  13   4   -0.53   18.49
   4  13   4   -7.84   21.92
   5  13   4   49.54   31.31
   5  13   4   69.95   26.71
   6  13   4   -9.55   22.66
   6  13   4  -11.06   29.30
   7  13   4  128.19   40.90
   7  13   4  131.33   38.15
   8  13   4  -23.24   25.29
   8  13   4    1.81   31.36
   9  13   4   23.04   39.19
   8 -14  -4  134.03   52.95
   7 -14  -4   64.27   44.54
   6 -14  -4   25.33   32.17
   5 -14  -4   63.24   38.02
  -4  14   4   89.44   38.95
   4 -14  -4  103.17   38.36
  -3  14   4   65.37   33.02
   3 -14  -4  187.59   37.42
   2 -14  -4   62.45   29.86
  -2  14   4   62.92   29.93
  -1  14   4  178.95   36.79
   1 -14  -4  142.86   35.72
   0  14   4   -9.18   20.51
   0 -14  -4  -21.39   19.11
   1  14   4  240.85   35.00
   2  14   4   23.16   24.50
   3  14   4  111.27   35.18
   4  14   4  -21.47   25.08
   5  14   4   36.66   34.46
   6  14   4  -13.27   31.12
   6  14   4  -22.65   22.53
   7  14   4   17.37   25.76
   7  14   4   -0.29   34.88
   8  14   4   45.60   38.78
   8  14   4   65.35   32.98
   9  14   4  -62.24   32.84
   8 -15  -4  133.69   56.19
   7 -15  -4   26.29   39.78
   6 -15  -4  131.78   51.61
   5 -15  -4   -4.52   29.09
  -4  15   4   87.98   42.77
   4 -15  -4  101.64   42.48
  -3  15   4  -16.48   24.93
   3 -15  -4   10.09   25.39
   2 -15  -4  225.43   40.31
  -2  15   4  216.48   37.15
  -1  15   4  134.48   35.44
   1 -15  -4  108.41   33.17
   0  15   4  172.17   32.11
   1  15   4   -8.64   24.50
   2  15   4  307.68   41.78
   3  15   4   24.23   29.90
   4  15   4   80.62   35.72
   5  15   4   13.32   33.80
   6  15   4   80.50   42.38
   7  15   4  -17.17   36.92
   8  15   4  -47.39   37.81
   8  15   4  -34.26   29.00
   7 -16  -4   92.65   51.48
   6 -16  -4   56.08   48.83
   5 -16  -4   64.28   41.69
   4 -16  -4   18.82   36.67
   3 -16  -4   37.90   34.18
  -3  16   4   62.46   38.88
  -2  16   4  -19.19   26.42
   2 -16  -4    1.06   26.27
  -1  16   4   36.80   27.09
   1 -16  -4  131.91   31.10
   0  16   4   10.94   25.04
   1  16   4   43.97   28.64
   2  16   4   83.88   32.64
   3  16   4   48.49   33.41
   4  16   4   34.48   33.81
   5  16   4   16.19   36.14
   6  16   4  162.27   50.65
   7  16   4   -2.69   38.62
   7 -17  -4   84.60   54.56
   6 -17  -4  132.08   56.51
   5 -17  -4   22.78   44.62
   4 -17  -4   51.66   42.89
  -3  17   4    1.21   36.31
   3 -17  -4   -1.07   28.75
  -2  17   4   11.17   31.97
   2 -17  -4   47.15   32.24
  -1  17   4   26.93   32.01
   0  17   4  167.00   35.01
   1  17   4  118.71   36.36
   2  17   4  -25.15   26.95
   3  17   4   -4.70   28.45
   4  17   4  -18.59   32.62
   5  17   4   22.69   38.50
   6  17   4  -23.48   38.45
   7  17   4   -3.67   43.72
   6 -18  -4   61.84   54.01
   5 -18  -4  216.18   53.67
   4 -18  -4   16.34   39.61
   3 -18  -4   22.33   37.56
  -3  18   4    6.81   38.71
   2 -18  -4   41.81   33.01
  -2  18   4   -1.49   32.49
  -1  18   4  121.24   41.09
   0  18   4   14.17   30.57
   1  18   4   97.51   35.13
   2  18   4   -0.15   26.87
   3  18   4  -37.01   30.38
   4  18   4  -50.24   32.98
   5  18   4    7.03   33.21
   6  18   4  -13.06   41.54
   5 -19  -4   46.10   45.82
   4 -19  -4  112.00   49.67
   3 -19  -4   17.43   37.35
  -2  19   4  -15.63   34.07
  -1  19   4  -17.99   33.65
   0  19   4  117.74   42.86
   1  19   4    1.14   32.28
   2  19   4  -38.46   31.21
   3  19   4  -50.63   32.34
   4  19   4  -21.24   36.35
   5  19   4  -26.15   37.02
   4 -20  -4   72.65   45.30
   3 -20  -4  105.68   44.71
  -2  20   4  -34.62   41.17
  -1  20   4   30.78   38.81
   0  20   4   -2.83   35.66
   1  20   4  -17.50   35.17
   2  20   4  -11.38   35.89
   3  20   4  -37.33   36.13
   4  20   4  -27.85   36.84
  -2  21   4    2.93   42.53
  -1  21   4  -31.43   38.44
   0  21   4    1.04   39.58
   1  21   4   -5.01   38.88
   2  21   4  -12.84   37.85
   3  21  -5    8.20   33.34
   2  21  -5    8.90   31.22
   1  21  -5    0.20   30.04
   4  20  -5   10.65   32.04
   3  20  -5   34.97   35.42
   2  20  -5   -8.03   27.00
   1  20  -5   40.15   32.04
   3 -20   5  -17.70   26.41
   4 -20   5   -0.50   28.17
   5  19  -5    4.94   34.37
   4  19  -5   65.53   37.94
   3  19  -5    3.31   30.55
   2  19  -5    3.58   27.98
   1  19  -5  -31.62   23.17
   0  19  -5   32.15   30.42
   2 -19   5   14.38   24.35
   3 -19   5   -8.92   24.64
   4 -19   5   -6.77   28.24
   5 -19   5   32.48   37.37
   5  18  -5   34.50   36.91
   4  18  -5   58.53   35.81
   3  18  -5  -13.45   27.34
   2  18  -5   -2.30   27.67
   1  18  -5   -9.24   26.34
   0  18  -5   42.16   29.48
   2 -18   5  138.25   30.54
   3 -18   5   -5.70   26.12
   4 -18   5    9.42   30.07
   5 -18   5   -0.91   32.70
   6 -18   5  142.00   50.09
   5  17  -5   33.06   34.31
   4  17  -5   64.84   33.51
   3  17  -5  -21.55   22.37
   2  17  -5    9.45   26.34
   1  17  -5   -8.93   23.37
   0  17  -5   99.63   32.44
   1 -17   5   43.79   21.96
   2 -17   5    9.33   24.93
   3 -17   5   13.38   25.73
   4 -17   5   -8.91   28.66
   5 -17   5   -0.36   33.25
   6 -17   5   11.25   35.92
  -7 -16   5    4.29   13.61
   5  16  -5  111.98   40.14
   4  16  -5   -0.11   24.22
   3  16  -5   40.02   30.06
   2  16  -5  -30.66   20.65
   1  16  -5   83.15   30.61
   0  16  -5   30.66   23.19
  -1  16  -5   69.00   24.94
   1 -16   5  104.16   26.80
   2 -16   5   33.82   24.48
   3 -16   5    5.67   24.50
   4 -16   5   40.69   31.52
   5 -16   5   -1.76   30.93
   6 -16   5   35.06   32.30
   7 -16   5   32.71   39.02
  -8 -15   5    7.64   17.51
  -7 -15   5   -1.26   13.05
   5  15  -5    7.76   29.56
   4  15  -5   23.93   28.29
   3  15  -5   -5.65   23.39
   2  15  -5   24.63   25.47
   1  15  -5  126.85   26.52
   0  15  -5   74.47   28.13
   0 -15   5   79.72   22.45
   1 -15   5   77.69   23.69
  -1  15  -5   30.79   23.33
   2 -15   5   -2.00   19.56
   3 -15   5  235.41   38.84
   4 -15   5   18.38   28.75
   5 -15   5  144.43   41.42
   6 -15   5   -1.37   31.93
   7 -15   5  117.26   45.83
  -8 -14   5    6.89   18.22
  -7 -14   5   61.03   20.83
   5  14  -5   25.41   24.45
   4  14  -5  -19.07   24.76
   3  14  -5  150.39   30.64
   2  14  -5   15.92   23.42
   1  14  -5  120.29   25.28
   0  14  -5   29.21   21.23
   0 -14   5   50.52   19.81
   1 -14   5   11.95   18.67
  -1  14  -5    1.52   19.88
   2 -14   5   73.21   26.54
   3 -14   5   40.56   25.63
   4 -14   5   36.34   28.45
   5 -14   5   -6.61   23.21
   6 -14   5   30.48   32.36
   7 -14   5  -13.89   30.96
   8 -14   5   28.07   35.34
  -9 -13   5   -2.42   22.25
  -8 -13   5   64.77   23.90
  -7 -13   5   -2.29   15.35
  -6 -13   5  117.36   19.48
   5  13  -5   -0.22   25.56
   4  13  -5   90.11   28.94
   3  13  -5   27.00   25.16
   2  13  -5  440.29   46.14
   1  13  -5   67.69   24.25
   0  13  -5    6.66   17.28
  -1  13  -5   16.47   17.94
   1 -13   5   10.48   18.12
   2 -13   5   99.40   25.26
   4 -13   5  -16.66   22.38
   5 -13   5   -6.39   21.09
   7 -13   5   16.99   33.11
   8 -13   5   43.24   37.86
   9 -13   5   12.33   40.26
  -9 -12   5    6.77   25.18
   8  12  -5  -10.10   20.59
  -8 -12   5    8.23   19.85
  -7 -12   5   33.39   18.87
  -6 -12   5   15.29   15.88
   5  12  -5   20.72   26.69
   4  12  -5  -13.70   23.18
   3  12  -5   88.51   26.22
   2  12  -5   53.80   22.93
   1  12  -5    9.20   16.97
   0  12  -5   74.85   20.99
  -1  12  -5   -4.50   14.15
  -2  12  -5    3.62   14.92
   2 -12   5   -2.31   12.85
   3 -12   5    6.41   20.21
   4 -12   5  185.90   34.28
   5 -12   5  -10.42   24.43
   6 -12   5   31.20   31.24
   7 -12   5   14.12   26.48
   8 -12   5  127.77   43.04
   9 -12   5   -4.16   37.39
  -9 -11   5   -0.32   25.09
   9  11  -5  -44.42   22.62
  -8 -11   5   27.01   23.54
   8  11  -5    3.79   20.87
   7  11  -5  -14.43   20.46
  -7 -11   5  -14.26   17.10
  -6 -11   5   25.80   18.16
   4  11  -5   18.29   22.98
   3  11  -5   14.84   20.26
   2  11  -5   70.09   22.82
   1  11  -5  609.62   52.83
   0  11  -5  145.13   23.09
  -1  11  -5   25.87   15.97
   2 -11   5    0.04   12.77
  -2  11  -5   -3.80   14.02
   3 -11   5  198.22   25.13
   4 -11   5   26.02   16.13
   4 -11   5    2.53   17.47
   5 -11   5  294.04   42.54
   6 -11   5  -14.25   20.65
   7 -11   5  144.86   35.49
   8 -11   5   28.65   34.02
   9 -11   5  174.59   51.31
 -10 -10   5   -3.54   26.63
   9  10  -5   14.33   23.72
  -9 -10   5   32.88   27.51
  -8 -10   5   33.56   24.31
   8  10  -5   14.01   19.90
   7  10  -5   86.15   23.74
  -7 -10   5  128.59   28.39
  -6 -10   5  -12.10   15.46
   6  10  -5   -6.94   15.21
   4  10  -5   71.43   22.21
   3  10  -5  158.50   24.87
   2  10  -5   44.33   20.11
   1  10  -5  431.99   40.51
   0  10  -5   12.25   14.54
  -1  10  -5  105.09   20.25
   2 -10   5   98.37   17.94
   3 -10   5  106.36   24.20
   4 -10   5   28.60   17.66
   4 -10   5   21.98   17.21
   5 -10   5   31.33   18.52
   5 -10   5    4.94   17.46
   6 -10   5   72.77   30.28
   7 -10   5    3.40   27.09
   8 -10   5   38.96   33.05
   9 -10   5   21.24   35.41
  10 -10   5    8.01   38.75
  10   9  -5    8.70   20.32
 -10  -9   5    6.85   30.56
  -9  -9   5   24.48   27.09
   9   9  -5    1.91   20.06
   8   9  -5   29.48   19.16
  -8  -9   5   30.56   24.25
  -7  -9   5  -21.53   17.57
   7   9  -5   -9.05   13.85
   6   9  -5  105.24   19.76
  -6  -9   5  150.20   28.11
  -5  -9   5    3.22   13.94
   5   9  -5    2.33   13.45
   4   9  -5  109.53   23.56
   3   9  -5  116.18   26.06
   2   9  -5  525.10   46.86
   1   9  -5   -7.09   14.75
   0   9  -5   83.17   18.81
  -1   9  -5  147.39   19.39
  -2   9  -5  159.95   18.86
   2  -9   5  152.36   20.77
   3  -9   5  122.90   20.55
   4  -9   5    4.17   13.54
   5  -9   5  124.96   23.08
   5  -9   5  118.65   25.01
   6  -9   5    8.55   17.96
   6  -9   5    0.73   21.55
   7  -9   5  134.65   33.30
   7  -9   5  128.87   24.09
   8  -9   5   36.15   31.05
   9  -9   5   -0.59   32.29
  10  -9   5   38.16   40.07
 -10  -8   5   30.76   25.81
  10   8  -5  -14.80   23.07
  -9  -8   5   80.05   28.66
   9   8  -5   43.14   21.33
  -8  -8   5   11.38   21.69
   8   8  -5   -0.01   19.03
   7   8  -5   -0.66   14.51
  -7  -8   5    4.79   18.75
  -6  -8   5   -6.10   15.09
   6   8  -5  -13.39   12.95
   5   8  -5  114.44   18.14
  -5  -8   5  148.97   21.87
   3   8  -5   50.28   18.93
   2   8  -5  196.81   25.15
   1   8  -5   99.76   18.26
   0   8  -5   78.93   17.41
  -1   8  -5   -3.46   10.10
  -2   8  -5  468.47   38.58
   2  -8   5  519.61   40.85
  -3   8  -5   23.42   10.61
   3  -8   5   57.10   18.38
   4  -8   5  302.01   31.06
   5  -8   5   59.88   19.81
   5  -8   5   56.10   22.18
   6  -8   5  374.65   47.16
   6  -8   5  435.11   39.70
   7  -8   5   82.13   31.55
   7  -8   5   99.90   25.48
   8  -8   5   66.34   23.33
   8  -8   5  106.72   33.88
   9  -8   5  -11.29   30.58
  10  -8   5   93.65   46.16
  10   7  -5   60.02   24.07
 -10  -7   5   65.46   31.52
   9   7  -5    6.14   20.19
  -9  -7   5   29.48   22.80
   8   7  -5  147.95   24.93
  -8  -7   5  152.78   26.74
  -7  -7   5  -11.61   16.30
   7   7  -5    3.74   12.08
   6   7  -5  277.93   28.76
  -6  -7   5  322.41   32.82
  -5  -7   5  -15.64   12.84
   5   7  -5    0.05   12.29
   4   7  -5  737.11   47.57
  -4  -7   5  584.80   50.84
   2   7  -5   -3.57   11.53
   1   7  -5  -16.83   10.02
   0   7  -5  348.92   30.86
   1  -7   5    1.06    8.34
  -2   7  -5   -7.16    7.87
   2  -7   5    3.91    9.71
  -3   7  -5   80.51   11.72
   3  -7   5   98.59   17.06
   4  -7   5  193.74   24.72
   5  -7   5   86.23   19.96
   6  -7   5   43.43   19.91
   6  -7   5   57.65   24.15
   7  -7   5   32.97   26.32
   7  -7   5   26.85   18.79
   8  -7   5    0.21   18.17
   8  -7   5    3.96   27.46
   9  -7   5    5.60   21.60
   9  -7   5   10.03   30.77
  11   6  -5   44.73   27.73
 -10  -6   5   27.91   24.26
  10   6  -5  -11.74   20.37
  -9  -6   5  128.88   25.70
   9   6  -5  132.07   26.79
   8   6  -5    2.28   15.54
  -8  -6   5    0.17   17.41
  -7  -6   5   72.36   23.42
   7   6  -5  111.14   23.04
  -6  -6   5   -8.10   14.15
   6   6  -5    7.73   12.12
  -5  -6   5  623.39   50.97
   5   6  -5  624.14   45.90
   4   6  -5   87.81   14.26
  -4  -6   5   62.12   16.24
  -3  -6   5  202.40   22.01
   2   6  -5    4.28    9.43
   1   6  -5  124.96   17.49
   0   6  -5    4.56    8.64
   1  -6   5  552.61   40.16
  -1   6  -5  557.90   41.61
   2  -6   5  148.08   19.24
   3  -6   5   12.36   10.61
  -3   6  -5    0.58    4.88
   4  -6   5   45.80   18.18
   5  -6   5   66.55   19.30
   6  -6   5  146.35   28.36
   7  -6   5  -12.48   20.69
   7  -6   5    2.20   17.14
   8  -6   5   56.71   21.72
   8  -6   5   72.65   31.20
   9  -6   5   -5.75   21.34
   9  -6   5   -4.65   32.48
  10  -6   5   43.15   24.74
  11   5  -5   54.15   27.45
  10   5  -5   -3.46   15.44
 -10  -5   5   16.23   22.53
  -9  -5   5   -0.19   18.73
   9   5  -5  -14.87   17.35
   8   5  -5   -0.08   12.45
  -8  -5   5    2.47   16.13
  -7  -5   5    6.89   16.51
   7   5  -5   16.02   13.60
   6   5  -5    9.93   11.63
  -6  -5   5    2.62   14.32
   5   5  -5   19.18   11.93
  -4  -5   5  -10.84   10.83
   4   5  -5    3.99    9.62
  -3  -5   5  820.21   59.85
  -2  -5   5   15.90    9.92
   0   5  -5   79.43   11.62
   1  -5   5  377.58   29.99
   2  -5   5   -8.03    9.33
   3  -5   5  309.10   29.57
   4  -5   5   -5.55    9.32
   5  -5   5  325.30   31.37
   6  -5   5   23.26   18.12
   6  -5   5   14.24   14.24
   7  -5   5  217.81   27.02
   7  -5   5  221.25   35.03
   8  -5   5    0.63   23.71
   8  -5   5   12.71   16.79
   9  -5   5   92.82   39.44
   9  -5   5   90.38   29.09
  10  -5   5   17.50   25.95
  11  -5   5   13.44   30.77
  11   4  -5   -2.65   16.56
  10   4  -5   -9.14   14.67
  -9  -4   5   43.13   21.37
   9   4  -5   57.56   19.12
   8   4  -5   79.98   19.31
  -8  -4   5   62.71   21.33
   7   4  -5  221.35   23.58
  -7  -4   5  223.78   27.41
   6   4  -5   10.10   10.51
  -6  -4   5   -5.32   12.94
   5   4  -5  100.35   15.18
  -5  -4   5   66.95   17.78
   4   4  -5  290.86   22.61
  -4  -4   5  198.34   23.40
   3   4  -5  329.66   24.41
  -3  -4   5  320.27   28.32
  -2  -4   5   53.87    9.78
  -1  -4   5  961.35   66.47
   0  -4   5  554.37   39.45
   1  -4   5  119.03   15.05
   1  -4   5  100.78   10.38
   2  -4   5 1099.20   72.39
   3  -4   5  132.78   17.50
   4  -4   5  680.77   50.23
   5  -4   5   19.22   13.00
   6  -4   5  542.77   46.00
   6  -4   5  634.50   60.38
   7  -4   5    2.83   17.24
   7  -4   5    9.57   19.93
   8  -4   5  117.57   28.04
   8  -4   5   96.12   31.70
   9  -4   5    5.19   20.85
  10  -4   5   97.04   32.79
  11  -4   5   38.02   31.02
  11   3  -5   -9.76   16.79
  10   3  -5   29.21   18.58
   9   3  -5    3.76   14.03
  -9  -3   5    2.89   20.92
  -8  -3   5  102.27   21.28
   8   3  -5  102.88   17.13
  -7  -3   5    0.34   15.77
   7   3  -5   34.80   14.63
   6   3  -5  176.50   19.18
  -6  -3   5  152.23   21.06
  -5  -3   5   45.75   16.16
   5   3  -5   78.26   13.18
  -4  -3   5  866.77   65.77
   4   3  -5  943.43   58.42
   3   3  -5    8.16    5.69
  -3  -3   5   -0.60    7.49
  -2  -3   5  719.53   51.85
  -1  -3   5 1458.04   98.23
   0  -3   5  508.23   36.27
   1  -3   5    5.23    3.94
   1  -3   5    7.32    7.33
   2  -3   5  267.90   23.85
   3  -3   5  863.97   58.70
   4  -3   5  142.65   19.68
   6  -3   5   36.11   15.46
   7  -3   5   75.04   26.91
   7  -3   5   63.64   20.36
   8  -3   5   38.82   25.18
   8  -3   5   42.34   19.94
   9  -3   5   54.53   23.48
  10  -3   5    3.85   25.27
  11  -3   5   13.65   24.43
  11   2  -5    4.43   16.24
  10   2  -5  -15.64   15.39
   9   2  -5   26.96   17.09
  -9  -2   5   18.56   20.25
   8   2  -5   62.02   17.07
  -8  -2   5   53.36   20.93
   7   2  -5    4.13   11.26
  -7  -2   5   -4.59   13.86
   6   2  -5    9.58    9.15
  -6  -2   5   -7.25   11.07
  -5  -2   5  306.92   29.37
   5   2  -5  307.69   24.92
   4   2  -5   26.07    8.28
  -4  -2   5    8.82    8.80
   3   2  -5  120.51   11.83
  -3  -2   5  119.88   15.20
  -2  -2   5   60.89   10.22
  -1  -2   5  117.13   12.24
   0  -2   5  181.42   15.07
   1  -2   5  400.82   29.16
   1  -2   5  430.89   31.51
   2  -2   5  179.59   18.04
   3  -2   5  159.52   18.56
   4  -2   5 1339.59   86.24
   5  -2   5  136.49   19.24
   6  -2   5   54.81   17.29
   7  -2   5   11.39   15.33
   7  -2   5   22.77   20.65
   8  -2   5  195.58   28.28
   9  -2   5    7.29   17.29
  10  -2   5   72.48   29.75
  11  -2   5   16.00   26.56
  11   1  -5    1.28   19.14
  10   1  -5   10.99   17.57
   9   1  -5   -9.44   13.28
  -9  -1   5    6.34   23.62
   8   1  -5  137.71   20.07
  -8  -1   5  135.52   26.18
  -7  -1   5  -18.15   17.38
   7   1  -5   15.48   11.50
   6   1  -5   74.37   14.13
  -6  -1   5   51.81   17.53
   6   1  -5   81.83   27.93
   5   1  -5   -5.00   14.51
   5   1  -5    2.47    6.22
   4   1  -5   20.73    7.55
  -4  -1   5    6.51   10.70
  -3  -1   5  258.17   22.71
   3   1  -5  226.73   18.02
  -2  -1   5  839.96   59.02
  -1  -1   5  216.99   18.39
   0  -1   5   63.70    8.06
   1  -1   5  832.04   56.42
   1  -1   5  797.71   52.83
   2  -1   5  759.11   50.67
   3  -1   5  681.14   48.02
   4  -1   5  251.76   24.79
   5  -1   5  320.28   29.43
  -5   1  -5  282.46   24.22
   6  -1   5   -5.86   13.22
   7  -1   5  184.18   25.91
   7  -1   5  242.47   32.66
   8  -1   5    9.24   16.07
   9  -1   5  141.53   31.89
  10  -1   5   20.82   22.38
  11  -1   5   35.94   26.07
  11   0  -5   62.58   23.50
  10   0  -5   -6.23   13.87
   9   0  -5   57.34   19.52
   8   0  -5   16.65   13.74
  -8   0   5  -10.01   18.90
   7   0  -5  543.82   38.26
   7   0  -5  514.11   61.12
  -7   0   5  410.63   43.66
   6   0  -5   -6.93    6.97
   6   0  -5  -13.51   17.73
   5   0  -5   17.03    8.40
   5   0  -5    8.17   16.51
   4   0  -5  -10.52   11.33
   4   0  -5   -4.74    5.07
   3   0  -5  302.34   21.14
   3   0  -5  300.18   38.31
  -2   0   5   -9.11    5.59
  -1   0   5 1808.42  121.03
   0   0   5    0.94    3.81
   0   0   5   -0.25    4.94
   1   0   5  629.33   45.15
   1   0   5  620.30   41.63
   2   0   5   -5.80    5.66
   2   0   5    6.54    5.69
   4   0   5    3.55    7.39
   4   0   5    2.02   10.90
   5   0   5    2.50   10.59
   6   0   5   -6.40   12.03
   7   0   5   10.06   14.46
   8   0   5    8.82   17.68
   9   0   5   31.47   20.26
  10   0   5   18.43   26.58
  11   0   5  -11.67   20.11
  11  -1  -5   15.73   17.42
  10  -1  -5   -3.08   13.79
   9  -1  -5    4.81   13.50
  -8   1   5  147.54   35.02
   8  -1  -5  144.04   20.03
  -7   1   5  -28.37   17.63
   7  -1  -5   -5.70   23.02
   7  -1  -5    9.34    9.34
   6  -1  -5   76.38   14.79
  -6   1   5   49.83   18.07
   6  -1  -5   62.38   27.18
   5  -1  -5    2.65   15.27
   5  -1  -5    2.88    7.34
  -4   1   5    2.41   10.12
   4  -1  -5    7.40   15.14
   4  -1  -5   18.12    6.52
   3  -1  -5  230.43   16.84
   3  -1  -5  226.15   31.09
  -1   1   5  167.29   17.00
   0   1   5   59.07   10.67
   0   1   5   58.06    7.85
   1   1   5  838.12   55.31
   1   1   5  918.06   61.74
   2   1   5 1191.87   81.10
   2   1   5 1196.67   75.22
   4   1   5  273.01   26.89
   4   1   5  290.39   23.80
   5   1   5  302.06   28.89
   5   1   5  403.74   34.24
   6   1   5  -15.41   10.92
   7   1   5  240.82   30.25
   8   1   5    5.08   17.11
   9   1   5  148.60   31.63
  10   1   5   35.81   25.56
  11   1   5   23.94   29.99
  10  -2  -5    0.94   15.36
   9  -2  -5   24.47   14.12
   8  -2  -5   52.12   32.23
  -8   2   5   39.50   29.66
   8  -2  -5   54.47   16.18
  -7   2   5  -11.80   16.52
   7  -2  -5  -11.37   22.37
   7  -2  -5   -7.88   10.52
   6  -2  -5   -2.40    8.51
   6  -2  -5  -12.43   16.95
  -6   2   5   -6.84   14.31
   5  -2  -5  310.45   39.75
  -5   2   5  294.34   28.99
   5  -2  -5  265.93   22.20
   4  -2  -5   20.77   15.39
   4  -2  -5   17.98    6.50
  -4   2   5   13.59   10.59
   3  -2  -5   92.50   19.43
   3  -2  -5  112.56    9.80
  -3   2   5  106.33   15.30
  -2   2   5   65.64   13.02
   2  -2  -5   60.34   17.61
   1  -2  -5  106.27   19.89
  -1   2   5  130.35   17.12
   0   2   5  208.55   21.04
   0   2   5  210.78   16.52
   1   2   5  480.66   32.00
   1   2   5  422.13   34.25
   2   2   5  273.22   22.79
   2   2   5  223.72   21.15
   3   2   5  259.25   22.89
   3   2   5  245.09   24.08
   4   2   5 1415.36   96.25
   5   2   5  121.41   19.61
   5   2   5  114.29   16.20
   6   2   5   68.83   20.71
   7   2   5   20.61   18.02
   8   2   5  147.73   25.98
   9   2   5   27.09   23.86
  10   2   5   77.17   32.78
  11   2   5   -5.58   22.72
   9  -3  -5    2.38   13.50
   8  -3  -5  176.58   43.84
   8  -3  -5   86.02   15.67
  -8   3   5  104.86   36.79
   7  -3  -5    6.10   26.43
  -7   3   5    1.29   20.45
   7  -3  -5   17.52   12.00
   6  -3  -5  123.25   14.75
   6  -3  -5  143.58   35.15
  -6   3   5  104.02   20.11
   5  -3  -5   63.56   11.64
   5  -3  -5   33.55   23.81
  -5   3   5   58.67   17.50
   4  -3  -5  832.96   77.38
  -4   3   5  804.31   63.34
   4  -3  -5  797.33   50.30
   3  -3  -5   11.08    4.59
   3  -3  -5    3.33   12.82
  -3   3   5   16.85   12.31
   2  -3  -5  445.86   47.84
  -2   3   5  519.46   42.86
  -1   3   5  918.09   72.50
   1  -3  -5 1025.87   87.11
   0   3   5  565.61   42.31
   0   3   5  485.26   33.85
   1   3   5   21.52    7.99
   1   3   5   11.19    6.50
   2   3   5  445.36   32.73
   2   3   5  395.62   33.30
   3   3   5 1425.41   94.07
   3   3   5 1545.22  102.37
   4   3   5  128.47   19.22
   4   3   5  116.60   16.28
   5   3   5   -0.76   14.87
   5   3   5   -5.12   10.58
   6   3   5   48.68   15.73
   6   3   5   15.87   16.98
   7   3   5   57.86   24.43
   8   3   5   32.67   20.68
   9   3   5   86.32   29.41
  10   3   5    3.64   21.51
  11   3   5  -15.30   28.83
   9  -4  -5   68.79   38.08
   8  -4  -5   74.89   33.98
   8  -4  -5   70.43   16.87
  -7   4   5  188.77   31.79
   7  -4  -5  179.01   19.56
   7  -4  -5  191.00   36.57
   6  -4  -5    0.94    7.15
   6  -4  -5  -25.95   18.32
  -6   4   5   11.28   16.43
   5  -4  -5   63.30   23.53
   5  -4  -5   53.72    9.84
  -5   4   5   82.24   22.52
  -4   4   5  159.85   25.10
   4  -4  -5  192.91   30.31
   4  -4  -5  195.87   15.07
   3  -4  -5  254.26   32.11
   3  -4  -5  288.81   17.59
  -3   4   5  229.09   29.77
  -2   4   5   82.42   21.37
   2  -4  -5   65.63   15.92
   0   4   5  542.78   34.28
   0  -4  -5  488.36   50.45
   1   4   5  126.57   16.29
   1   4   5  175.89   16.61
   2   4   5 1832.78  112.58
   3   4   5  164.56   19.79
   3   4   5  150.97   19.20
   4   4   5  818.89   57.13
   4   4   5  680.21   54.54
   5   4   5   18.49   15.18
   5   4   5   30.09   13.42
   6   4   5  711.09   56.78
   6   4   5  683.11   53.92
   7   4   5   -9.76   15.63
   8   4   5  121.59   33.04
   9   4   5   -0.71   22.25
  10   4   5   97.30   32.20
  11   4   5   -2.20   23.98
   9  -5  -5   28.98   31.00
   8  -5  -5   17.31   26.81
  -7   5   5    1.21   21.64
   7  -5  -5    9.58   20.84
   6  -5  -5    0.94    8.11
   6  -5  -5  -11.05   20.01
  -6   5   5    0.07   17.11
   5  -5  -5    0.22    7.12
  -5   5   5   -7.69   16.50
  -4   5   5   -8.65   15.31
   4  -5  -5   -4.39    5.24
  -3   5   5  497.06   51.58
   3  -5  -5  607.50   56.72
   3  -5  -5  552.04   33.26
   2  -5  -5    8.20   13.88
  -2   5   5   19.97   15.87
   1  -5  -5  -12.58    8.41
  -1   5   5    7.11   12.20
   0   5   5  101.82   11.09
   0   5   5  132.64   17.16
   0  -5  -5   87.03   18.33
   1   5   5  598.53   38.55
   1   5   5  501.72   42.83
   2   5   5   -7.84    8.41
   2   5   5   -5.64    7.96
   3   5   5  520.01   45.36
   3   5   5  608.59   44.29
   4   5   5    3.44   12.47
   4   5   5   -5.57   10.65
   5   5   5  385.86   35.08
   5   5   5  408.74   38.12
   6   5   5    4.67   14.70
   6   5   5    0.69   17.64
   7   5   5  209.19   31.42
   8   5   5  -22.74   19.47
   9   5   5   56.01   29.49
  10   5   5   -8.25   25.86
  11   5   5    9.05   28.85
   9  -6  -5  156.76   38.01
   8  -6  -5    0.29   26.22
   7  -6  -5   95.42   34.08
  -7   6   5   22.95   29.87
  -6   6   5  -19.66   23.19
   6  -6  -5    7.61   20.58
   5  -6  -5  482.24   53.17
   5  -6  -5  439.00   31.14
   4  -6  -5   56.19   25.60
   4  -6  -5   63.47    8.50
  -4   6   5   64.23   24.89
  -3   6   5  159.82   27.77
   3  -6  -5  146.76    9.53
   3  -6  -5  107.80   25.84
  -2   6   5    8.49   15.95
   2  -6  -5   -4.15   10.18
   1  -6  -5   83.31   20.80
  -1   6   5   88.26   16.69
   0   6   5   11.06    5.94
   0  -6  -5    3.49   11.91
   0   6   5   37.74   12.87
   2   6   5  189.29   20.83
   2   6   5  215.07   24.13
   3   6   5   10.32   13.10
   3   6   5    6.78   13.30
   4   6   5   48.04   17.02
   4   6   5   73.56   20.66
   5   6   5  103.43   21.15
   5   6   5  101.52   24.55
   6   6   5   97.43   22.69
   6   6   5   86.78   25.47
   7   6   5   -8.45   14.79
   7   6   5  -14.23   19.74
   8   6   5   84.09   32.91
  10   6   5   22.11   31.13
  10  -7  -5  101.91   45.45
   9  -7  -5   90.38   37.71
   8  -7  -5  147.64   35.53
   7  -7  -5   25.00   25.68
   6  -7  -5  227.61   33.77
  -6   7   5  128.14   36.64
   5  -7  -5   -8.53   14.64
  -5   7   5   -8.94   24.13
   4  -7  -5  559.43   60.73
  -4   7   5  651.13   63.47
  -3   7   5   -8.25   18.43
  -2   7   5   -6.77   15.02
  -1   7   5   -3.42   11.90
   0   7   5  401.05   25.85
   0   7   5  348.86   33.79
   0  -7  -5  387.79   41.03
   1   7   5   -0.38   10.41
  -1  -7  -5   -9.12    8.28
   1   7   5   -5.78    6.84
   2   7   5  -11.61    9.12
   2   7   5    6.98   12.55
   3   7   5  176.96   21.96
   3   7   5  167.81   24.30
   4   7   5  265.46   30.22
   4   7   5  223.91   26.81
   5   7   5  149.28   28.48
   5   7   5  118.48   25.34
   6   7   5   57.10   22.26
   6   7   5   27.98   21.37
   7   7   5    1.56   23.02
   7   7   5   -7.71   18.34
   8   7   5  -10.01   22.23
   9   7   5  -43.94   25.59
  10   7   5   -9.95   27.54
  10  -8  -5   47.46   40.67
   9  -8  -5  137.47   42.74
   8  -8  -5   -2.87   28.79
   7  -8  -5   -9.83   23.68
  -6   8   5    2.32   27.49
   6  -8  -5  -22.86   19.86
  -5   8   5   98.67   33.29
  -4   8   5  151.38   40.45
   4  -8  -5  115.33   29.00
  -3   8   5   18.90   23.87
   3  -8  -5  -13.11   16.15
  -2   8   5  118.61   23.67
   2  -8  -5   95.79   21.68
  -1   8   5  159.90   22.82
   1  -8  -5   95.34   27.53
   0  -8  -5   68.50   20.67
   0   8   5   89.98    9.11
   0   8   5   85.17   15.63
   1   8   5    1.72    9.12
  -1  -8  -5   -7.54   12.27
   1   8   5   27.40   12.43
   2   8   5  800.98   55.88
   2   8   5  815.27   63.99
   3   8   5   62.20   18.70
   3   8   5   78.80   23.22
   4   8   5  508.04   47.17
   4   8   5  483.95   42.45
   5   8   5   82.91   23.64
   5   8   5   65.01   23.84
   6   8   5  512.84   48.25
   6   8   5  509.63   49.60
   7   8   5   74.67   29.89
   7   8   5   87.30   25.76
   8   8   5   66.55   34.58
   9   8   5  -47.63   24.30
  10   8   5   37.02   34.61
  10  -9  -5   60.19   41.10
   9  -9  -5   55.47   37.60
   8  -9  -5   62.50   32.67
   7  -9  -5  -13.58   25.27
   6  -9  -5  157.30   33.22
  -6   9   5   88.85   38.24
  -5   9   5   22.85   31.80
   5  -9  -5   -7.86   17.33
  -4   9   5  114.16   38.26
   4  -9  -5  120.51   32.36
  -3   9   5  117.46   33.46
   3  -9  -5   53.86   25.84
   2  -9  -5  355.94   38.86
  -2   9   5  254.97   34.22
  -1   9   5   10.67   12.06
   0  -9  -5   21.27   22.37
   0   9   5   56.96    7.55
   0   9   5   98.84   18.46
  -1  -9  -5  186.55   27.38
   1   9   5  227.45   26.24
   1   9   5  181.51   18.49
   2   9   5  235.97   25.09
   2   9   5  255.31   28.70
   3   9   5  203.64   28.67
   3   9   5  156.34   22.41
   4   9   5  -20.00   15.15
   4   9   5   -6.87   19.75
   5   9   5  130.53   29.91
   5   9   5  149.39   31.97
   6   9   5  -27.49   20.36
   6   9   5    4.76   21.40
   7   9   5  140.02   35.88
   7   9   5  163.21   29.85
   8   9   5  -18.84   29.63
   9   9   5  -16.10   27.11
  10   9   5  -26.98   35.33
  10 -10  -5   37.03   42.48
   9 -10  -5   68.08   41.49
   8 -10  -5   75.54   39.58
   7 -10  -5  133.86   41.52
  -6  10   5   14.42   33.80
   6 -10  -5  -21.65   24.64
  -5  10   5  254.36   44.32
   5 -10  -5  237.03   40.11
  -4  10   5   64.35   31.36
   4 -10  -5   55.75   27.38
   3 -10  -5  135.39   28.83
  -3  10   5  199.32   35.03
   2 -10  -5   11.81   21.82
  -2  10   5   72.83   24.96
   1 -10  -5  345.69   41.56
  -1  10   5  308.28   34.98
   0 -10  -5   -5.26   12.74
   0  10   5   27.12   15.95
   1  10   5  135.31   15.80
  -1 -10  -5   88.84   21.95
   1  10   5  117.14   19.89
   2  10   5  195.41   22.65
   2  10   5  221.21   28.49
   3  10   5  107.60   23.44
   3  10   5  137.51   29.83
   4  10   5   14.96   18.84
   4  10   5   47.07   25.31
   5  10   5   27.54   23.82
   5  10   5  -10.58   18.99
   6  10   5   73.15   26.85
   6  10   5   63.16   29.26
   7  10   5  -10.54   22.96
   7  10   5    4.13   25.97
   8  10   5   33.45   29.03
   8  10   5  -16.78   24.24
   9  10   5  -23.21   30.00
  10  10   5  -26.61   35.74
   9 -11  -5   33.06   40.50
   8 -11  -5   61.99   38.83
   7 -11  -5    5.26   29.80
   6 -11  -5   63.14   33.87
  -5  11   5   53.57   36.57
   5 -11  -5   48.90   30.01
   4 -11  -5   21.84   25.84
  -4  11   5    7.02   27.07
   3 -11  -5   -6.74   17.33
  -3  11   5    6.46   22.73
  -2  11   5  116.68   29.36
   2 -11  -5   80.62   28.01
  -1  11   5  625.05   55.24
   1 -11  -5  556.62   60.76
   0  11   5  137.05   24.07
   0 -11  -5   95.94   28.88
   1  11   5   44.96   20.19
  -1 -11  -5   11.24   15.98
   2  11   5    3.46   18.16
   2  11   5   -7.45   16.11
   3  11   5  322.80   32.91
   3  11   5  322.77   39.13
   4  11   5   35.35   26.87
   4  11   5   -2.09   17.56
   5  11   5  404.26   45.31
   5  11   5  384.59   41.52
   6  11   5   -8.34   22.97
   6  11   5   -6.46   24.79
   7  11   5  155.04   37.88
   7  11   5  176.34   34.02
   8  11   5   -0.64   28.63
   8  11   5  -13.07   26.98
   9  11   5   97.71   45.13
   9 -12  -5   86.08   46.68
   8 -12  -5   76.96   42.33
   7 -12  -5   89.62   39.27
   6 -12  -5   24.08   31.70
  -5  12   5   56.33   38.95
   5 -12  -5   49.45   30.53
  -4  12   5   12.63   31.89
   4 -12  -5   -3.05   23.81
  -3  12   5  139.38   38.60
   3 -12  -5  160.27   30.87
  -2  12   5   46.09   25.42
   2 -12  -5   37.77   23.33
   1 -12  -5   -6.59   16.97
  -1  12   5   37.57   20.67
   0 -12  -5   63.98   22.93
   0  12   5   71.57   24.17
  -1 -12  -5  -15.49   13.40
   1  12   5   -4.61   16.21
   2  12   5   26.62   19.08
   3  12   5   16.60   20.10
   3  12   5    8.94   22.82
   4  12   5  246.01   30.93
   4  12   5  245.46   37.42
   5  12   5  -21.60   19.50
   5  12   5  -11.65   25.82
   6  12   5   53.08   25.90
   6  12   5  100.18   35.77
   7  12   5  -19.16   25.71
   7  12   5   -3.54   32.66
   8  12   5  131.53   38.44
   8  12   5   76.38   35.29
   9  12   5  -41.86   29.40
   9 -13  -5   88.48   49.38
   8 -13  -5  197.57   48.25
   7 -13  -5   13.85   31.75
   6 -13  -5  177.26   41.37
   5 -13  -5    7.68   26.28
  -5  13   5    6.70   30.98
   4 -13  -5  138.66   37.29
  -4  13   5   84.69   37.89
   3 -13  -5   34.35   28.62
  -3  13   5   65.06   33.23
  -2  13   5  443.17   50.50
   2 -13  -5  436.24   54.24
  -1  13   5   59.94   24.01
   1 -13  -5   47.46   25.01
   0 -13  -5  -11.46   17.24
   0  13   5    8.42   20.99
   1  13   5   37.26   21.43
   2  13   5  134.79   32.68
   3  13   5   77.90   29.62
   4  13   5  -34.00   25.00
   5  13   5  -11.06   28.23
   5  13   5  -17.70   20.33
   6  13   5  -38.02   27.84
   6  13   5  -30.04   21.76
   7  13   5  -13.79   28.66
   7  13   5   -2.49   32.24
   8  13   5  -25.47   26.48
   8  13   5  -16.52   30.73
   9  13   5   -6.80   37.63
   8 -14  -5   67.72   42.43
   7 -14  -5  155.75   52.26
   6 -14  -5    0.54   33.63
   5 -14  -5   25.33   33.35
  -4  14   5    7.92   31.29
   4 -14  -5    6.68   29.50
   3 -14  -5  149.70   33.69
  -3  14   5  158.15   41.91
   2 -14  -5   50.19   28.53
  -2  14   5   52.12   31.71
   1 -14  -5  173.63   33.77
  -1  14   5  132.81   27.95
   0 -14  -5    5.50   23.06
   0  14   5   44.76   25.67
   1  14   5   14.27   21.95
   2  14   5   77.47   30.06
   3  14   5   46.88   27.58
   4  14   5   42.77   31.64
   5  14   5  -35.02   28.07
   6  14   5   23.99   33.59
   7  14   5  -22.49   33.85
   7  14   5   -8.04   27.97
   8  14   5   -5.97   28.13
   8  14   5  -19.12   34.83
   8 -15  -5   77.44   51.24
   7 -15  -5  -13.13   39.61
   6 -15  -5   57.57   42.74
   5 -15  -5    4.69   31.46
  -4  15   5    9.61   39.24
   4 -15  -5   74.40   34.51
  -3  15   5   -9.94   30.51
   3 -15  -5  -13.88   28.20
  -2  15   5   38.55   31.77
   2 -15  -5  114.16   35.38
   1 -15  -5  232.08   37.79
  -1  15   5  172.92   35.06
   0  15   5   91.60   31.88
   1  15   5   65.89   27.35
   2  15   5    8.72   21.70
   3  15   5  207.15   34.83
   4  15   5    0.78   31.14
   5  15   5  165.66   45.27
   6  15   5  -15.61   36.50
   7  15   5   90.43   44.07
   8  15   5  -37.01   36.66
   7 -16  -5  108.76   54.28
   6 -16  -5   40.22   45.85
   5 -16  -5  175.12   45.19
   4 -16  -5   -4.91   33.88
  -4  16   5    7.16   38.73
   3 -16  -5  112.54   41.71
  -3  16   5   50.02   39.34
   2 -16  -5   -6.70   26.22
  -2  16   5   -5.74   27.49
  -1  16   5  123.54   38.04
   1 -16  -5  124.54   35.95
   0  16   5   31.95   29.01
   1  16   5   88.03   33.40
   2  16   5   27.81   28.81
   3  16   5  -17.81   29.06
   4  16   5   51.83   35.85
   5  16   5   -7.46   34.63
   6  16   5   -3.44   38.70
   7  16   5  -47.35   39.50
   6 -17  -5  136.11   54.70
   5 -17  -5   19.77   44.17
   4 -17  -5  113.58   48.17
  -3  17   5   18.27   36.09
   3 -17  -5   -5.48   33.18
  -2  17   5   31.44   34.29
   2 -17  -5   57.79   35.17
  -1  17   5   19.54   35.29
   0  17   5  141.42   40.30
   1  17   5   63.78   32.24
   2  17   5  -12.13   29.03
   3  17   5   -2.63   31.21
   4  17   5  -30.60   32.71
   5  17   5  -33.28   36.27
   6  17   5  -46.88   39.85
   7  17   5  -43.02   39.83
   6 -18  -5   35.54   45.48
   5 -18  -5  216.51   53.74
   4 -18  -5  174.34   54.11
   3 -18  -5   51.03   40.75
  -3  18   5  -26.66   36.10
   2 -18  -5   45.42   34.11
  -2  18   5  -13.39   33.45
  -1  18   5    2.60   33.46
   0  18   5   62.60   33.32
   1  18   5   18.19   31.96
   2  18   5  148.06   43.15
   4  18   5  -15.40   36.13
   5  18   5  -39.93   37.17
   6  18   5  104.88   50.45
   5 -19  -5   38.61   49.46
   4 -19  -5  190.68   57.70
  -3  19   5    3.27   39.16
   3 -19  -5   66.19   42.57
  -2  19   5  -14.52   39.14
  -1  19   5  -19.06   32.36
   0  19   5   26.99   36.02
   1  19   5    9.85   34.62
   2  19   5  -39.33   31.65
   3  19   5  -39.15   32.74
   4  19   5  -41.58   34.15
   5  19   5   -7.62   40.70
   4 -20  -5   65.39   45.95
   3 -20  -5  140.07   49.92
  -2  20   5  -15.11   40.02
  -1  20   5    8.38   41.38
   0  20   5  -14.62   36.78
   1  20   5  -11.73   36.39
   2  20   5  -24.42   36.12
   3  20   5  -46.02   33.44
  -2  21   5  -23.32   44.77
  -1  21   5  -28.53   39.70
   0  21   5   -6.64   40.29
   1  21   5   -4.51   40.80
   2  21   5  -44.13   35.23
   2  21  -6  -16.54   30.85
   4  20  -6   43.38   35.73
   3  20  -6   14.88   30.49
   2  20  -6   37.46   31.81
   1  20  -6  -12.20   26.16
   3 -20   6   -7.17   24.48
   4  19  -6   31.38   33.61
   3  19  -6   37.91   33.42
   2  19  -6  -17.26   26.57
   1  19  -6   15.71   29.53
   2 -19   6   -0.45   20.69
   3 -19   6    5.42   25.38
   4 -19   6  -14.94   27.91
   5 -19   6   27.13   34.99
  -6 -18   6   -1.98   10.55
   5  18  -6   33.96   35.21
   4  18  -6   24.25   30.72
   3  18  -6   20.14   28.43
   2  18  -6   -2.78   26.39
   1  18  -6   11.16   25.53
   0  18  -6   -7.21   23.01
   2 -18   6   31.02   22.70
   3 -18   6   10.26   24.69
   4 -18   6  -18.36   27.23
   5 -18   6    8.73   32.44
  -6 -17   6   -8.23   10.65
   5  17  -6   41.06   33.99
   4  17  -6   69.25   34.12
   3  17  -6   60.03   30.71
   2  17  -6  -18.54   22.68
   1  17  -6   34.10   28.92
   0  17  -6   34.41   27.49
   1 -17   6  130.07   25.35
   2 -17   6  -11.40   18.93
   3 -17   6  138.24   36.81
   4 -17   6   -8.83   25.98
   5 -17   6   36.16   35.54
   6 -17   6   15.21   34.40
  -7 -16   6   16.44   15.02
  -6 -16   6   -2.96   12.53
   4  16  -6   56.51   31.90
   3  16  -6  -15.74   24.00
   2  16  -6   18.30   24.37
   1  16  -6    2.22   21.94
   0  16  -6   90.67   27.40
   1 -16   6    9.61   17.91
   2 -16   6  161.80   30.57
   3 -16   6  -12.85   21.67
   4 -16   6   83.93   31.11
   5 -16   6    3.18   30.17
   6 -16   6  127.05   43.35
   7 -16   6    5.18   34.97
  -8 -15   6   29.83   18.90
  -7 -15   6   -6.20   14.14
  -6 -15   6   44.08   16.30
   4  15  -6   25.80   24.96
   3  15  -6   -2.02   23.29
   2  15  -6   77.22   28.30
   1  15  -6   26.53   23.48
   0 -15   6   31.89   16.02
   0  15  -6   16.43   23.25
  -1  15  -6    3.88   20.77
   1 -15   6   23.13   18.21
   2 -15   6   11.00   20.29
   3 -15   6   28.09   24.87
   4 -15   6  -19.29   19.29
   5 -15   6   -1.40   28.44
   6 -15   6  -11.52   25.11
   7 -15   6   12.76   30.68
  -8 -14   6   -5.14   19.04
  -7 -14   6    0.51   15.90
  -6 -14   6    3.65   13.64
   4  14  -6   10.66   25.84
   3  14  -6   26.78   26.73
   2  14  -6   14.94   23.47
   1  14  -6   81.69   26.87
   0  14  -6  174.62   28.42
  -1  14  -6   19.74   19.86
   2 -14   6   38.65   19.05
   3 -14   6  -14.31   19.77
   4 -14   6  126.05   31.26
   5 -14   6    6.20   27.28
   6 -14   6   -3.67   28.91
   7 -14   6    5.81   33.00
   8 -14   6    4.49   33.62
  -9 -13   6  -17.92   21.94
  -7 -13   6   32.84   19.63
  -6 -13   6   13.55   12.82
   4  13  -6    9.95   20.63
   3  13  -6   70.39   29.06
   2  13  -6   85.97   28.66
   1  13  -6  576.72   52.95
   0  13  -6   20.20   17.69
  -1  13  -6  131.61   23.43
   1 -13   6  165.13   24.50
   2 -13   6    0.14   14.85
   3 -13   6  455.87   51.95
   4 -13   6   -3.08   22.68
   5 -13   6  125.78   31.89
   6 -13   6  -16.65   26.56
   7 -13   6   67.88   33.51
   8 -13   6   -2.42   33.11
  -9 -12   6   11.99   25.74
  -8 -12   6   12.37   22.11
  -7 -12   6  117.64   27.10
  -6 -12   6   -2.43   13.94
  -5 -12   6   27.29   15.87
   4  12  -6  -10.94   17.83
   3  12  -6  103.22   30.28
   2  12  -6   95.74   26.96
   1  12  -6  174.66   26.42
  -1  12  -6    3.78   13.02
   1 -12   6  -13.34   14.45
   2 -12   6  -15.38   12.72
   3 -12   6    6.90   15.99
   4 -12   6   30.07   22.77
   5 -12   6    3.76   24.86
   6 -12   6  -13.92   21.52
   7 -12   6    7.79   29.59
   8 -12   6   31.37   33.99
   9 -12   6   33.87   39.10
  -9 -11   6   -7.34   24.21
  -8 -11   6   48.31   25.65
  -7 -11   6   -2.51   17.87
  -6 -11   6   87.75   20.63
  -5 -11   6  -11.33   13.67
   4  11  -6   46.54   22.40
   3  11  -6    2.98   20.43
   2  11  -6  261.55   32.60
   1  11  -6   22.14   18.73
   0  11  -6    9.88   15.05
  -1  11  -6  110.14   19.82
   1 -11   6  110.47   18.46
   2 -11   6   33.76   16.40
  -2  11  -6   15.70   15.64
   3 -11   6  153.52   23.74
   4 -11   6   10.55   15.71
   5 -11   6   40.01   23.88
   5 -11   6   27.29   21.09
   6 -11   6   25.65   28.11
   7 -11   6   -1.19   28.63
   8 -11   6   20.98   32.83
   9 -11   6   29.14   36.42
 -10 -10   6    2.76   30.27
  -9 -10   6   16.58   27.96
   9  10  -6  -13.61   17.44
  -8 -10   6  -11.19   20.92
   8  10  -6  -36.01   17.40
   7  10  -6    0.21   17.06
  -7 -10   6   -2.47   18.25
  -6 -10   6   30.32   20.24
  -5 -10   6   -8.59   11.49
   3  10  -6   30.52   18.13
   2  10  -6  246.47   31.15
   1  10  -6   -0.83   15.09
   0  10  -6  577.57   48.73
  -1  10  -6    4.51   12.74
   2 -10   6  385.05   36.30
  -2  10  -6  422.54   35.79
   3 -10   6   77.83   22.51
   4 -10   6  457.17   41.95
   5 -10   6   34.48   20.77
   5 -10   6   44.29   20.26
   6 -10   6  160.27   31.53
   6 -10   6  211.78   29.30
   7 -10   6   11.20   22.96
   8 -10   6  127.16   40.24
   9 -10   6   57.84   38.63
  10 -10   6   38.91   39.67
  10   9  -6   -3.28   23.15
 -10  -9   6   26.82   28.33
   9   9  -6  -26.35   21.23
  -9  -9   6    3.20   24.19
  -8  -9   6  121.28   30.53
   8   9  -6   72.11   23.73
   7   9  -6   -8.12   14.29
  -7  -9   6    2.65   14.93
   6   9  -6   -7.22   12.86
  -5  -9   6  125.44   21.89
  -4  -9   6  145.73   20.73
   3   9  -6   22.91   20.38
   2   9  -6   -0.70   15.70
   1   9  -6  471.85   42.64
   0   9  -6   87.17   17.37
  -1   9  -6  105.64   18.22
  -2   9  -6    8.18   12.35
   2  -9   6    1.31   10.54
   3  -9   6  264.98   30.63
   4  -9   6   10.81   15.25
   5  -9   6  187.98   27.83
   6  -9   6    8.63   18.66
   6  -9   6   31.53   23.16
   7  -9   6   32.04   21.35
   7  -9   6   45.00   28.34
   8  -9   6  113.27   37.79
   9  -9   6   76.79   38.50
  10  -9   6   29.02   39.97
 -10  -8   6    5.71   25.32
  10   8  -6   -9.90   18.57
   9   8  -6  112.42   28.12
  -9  -8   6  144.42   29.42
  -8  -8   6   87.62   26.84
   8   8  -6   36.24   18.43
  -7  -8   6  153.25   24.93
   7   8  -6  165.10   23.16
  -6  -8   6  -13.52   15.80
   6   8  -6  -11.95   11.30
  -5  -8   6  432.97   39.89
  -4  -8   6   98.55   20.11
  -3  -8   6   95.84   14.90
   2   8  -6   47.73   19.00
   1   8  -6   37.20   15.80
   0   8  -6   36.60   14.03
   1  -8   6   29.65   12.08
  -1   8  -6   23.60   12.05
  -2   8  -6  378.91   32.06
   2  -8   6  370.96   34.67
   3  -8   6   14.17   15.07
   4  -8   6    9.66   15.73
   5  -8   6    9.61   15.24
   6  -8   6  135.70   24.84
   6  -8   6  123.20   26.07
   7  -8   6  125.92   30.22
   7  -8   6  106.68   27.76
   8  -8   6   27.39   29.01
   8  -8   6   31.79   23.76
   9  -8   6   50.09   36.09
  10  -8   6    0.17   38.84
  10   7  -6   10.82   20.49
 -10  -7   6    9.19   23.23
  -9  -7   6   11.67   21.59
   9   7  -6    6.89   19.98
  -8  -7   6   65.88   23.35
   8   7  -6   64.08   21.33
   7   7  -6    6.41   16.40
  -7  -7   6   15.74   18.60
   6   7  -6   53.65   19.32
  -6  -7   6   77.24   20.86
  -5  -7   6   -2.72   14.17
   5   7  -6    0.29    9.57
  -4  -7   6   34.09   14.33
  -3  -7   6  401.21   34.98
   0   7  -6   44.84   14.39
   1  -7   6  441.24   34.81
  -1   7  -6  370.46   33.02
   2  -7   6   48.54   15.26
  -2   7  -6   37.08   10.46
   3  -7   6  416.77   37.70
   4  -7   6    6.21   12.58
   5  -7   6   55.78   20.72
   6  -7   6    7.75   15.96
   6  -7   6   19.59   19.39
   7  -7   6  128.75   30.11
   7  -7   6  145.28   29.87
   8  -7   6   36.57   23.55
   8  -7   6   31.55   28.30
   9  -7   6   16.35   24.37
   9  -7   6   12.67   30.55
  10  -7   6   12.59   21.91
  11   6  -6  -15.69   17.12
 -10  -6   6    5.62   23.81
  10   6  -6  -16.79   20.18
  -9  -6   6   49.39   23.49
   9   6  -6   52.38   21.11
  -8  -6   6  107.12   22.80
   8   6  -6   97.80   22.03
   7   6  -6   -5.45   13.03
  -7  -6   6  -13.43   12.75
   6   6  -6  -15.84   11.11
  -6  -6   6  -22.00   13.32
   5   6  -6  198.37   21.00
  -5  -6   6  121.24   22.28
  -4  -6   6  288.92   28.66
  -3  -6   6  110.40   17.53
  -2  -6   6  458.44   37.02
  -1  -6   6  135.05   16.08
   0  -6   6  167.96   16.17
   1  -6   6   18.70   10.39
   2  -6   6 1687.08  109.88
   2  -6   6 1766.78  114.14
   3  -6   6    8.55   11.70
   4  -6   6  312.10   30.74
   5  -6   6   18.07   14.91
   6  -6   6  371.07   37.02
   7  -6   6   17.76   22.16
   7  -6   6   27.50   18.28
   8  -6   6   99.25   28.08
   8  -6   6   54.68   28.72
   9  -6   6   22.72   31.37
   9  -6   6   14.73   23.55
  10  -6   6   38.20   28.91
  11   5  -6  -14.77   18.08
  10   5  -6   66.71   21.77
 -10  -5   6   73.39   30.04
   9   5  -6   10.30   17.65
  -9  -5   6   12.51   19.01
   8   5  -6   97.58   23.14
  -8  -5   6  102.68   24.81
  -7  -5   6  -20.31   13.98
   7   5  -6   -4.71    9.77
  -6  -5   6  122.23   20.78
   6   5  -6  118.38   17.05
   5   5  -6   87.21   13.97
  -5  -5   6   72.79   20.67
  -4  -5   6  472.49   38.35
   4   5  -6  391.15   31.93
  -2  -5   6   72.30   13.57
  -1  -5   6  227.85   20.65
   0  -5   6  537.82   39.50
   1  -5   6   87.13   14.57
   1  -5   6   57.50    9.56
   2  -5   6   -0.94    4.30
   2  -5   6    2.82    9.96
   3  -5   6    6.05   11.57
   4  -5   6   -4.99   10.85
   5  -5   6   41.78   16.37
   6  -5   6   69.68   20.70
   7  -5   6   29.57   22.27
   7  -5   6   33.50   18.57
   8  -5   6   75.54   27.06
   8  -5   6   97.57   32.46
   9  -5   6    6.83   18.93
  10  -5   6   29.83   28.27
  11  -5   6    2.87   28.74
  11   4  -6    0.90   19.13
  10   4  -6   -3.84   16.53
 -10  -4   6   16.78   25.70
  -9  -4   6   55.18   23.51
   9   4  -6   76.23   20.26
  -8  -4   6    8.52   16.31
   8   4  -6    0.35   12.54
   7   4  -6  -13.53   10.17
   6   4  -6   65.63   14.67
  -6  -4   6   45.25   17.27
   5   4  -6  229.66   22.53
  -5  -4   6  276.89   28.38
  -4  -4   6  201.18   23.83
   4   4  -6  284.55   22.52
  -3  -4   6  166.03   18.65
  -2  -4   6  503.60   39.09
  -1  -4   6   44.11   10.15
   0  -4   6  546.32   39.74
   1  -4   6   76.37    9.74
   1  -4   6   94.40   13.50
   2  -4   6  388.78   33.28
   3  -4   6   69.36   16.89
   4  -4   6  435.94   37.92
   5  -4   6   52.18   17.61
   7  -4   6  144.71   23.37
   7  -4   6  148.01   28.58
   8  -4   6   94.27   25.14
   8  -4   6   88.83   32.47
   9  -4   6   44.10   25.81
  10  -4   6   52.88   30.02
  11  -4   6   36.59   26.57
  11   3  -6   -4.88   18.03
  10   3  -6   -1.50   16.50
   9   3  -6   -7.73   13.27
  -9  -3   6   21.01   19.96
   8   3  -6   12.91   13.46
  -8  -3   6   19.67   17.71
  -7  -3   6   16.17   16.67
   7   3  -6   23.48   11.27
   6   3  -6   71.89   13.14
  -6  -3   6   71.53   19.10
  -5  -3   6   63.85   16.04
   5   3  -6   88.46   13.77
   4   3  -6   56.52   11.41
  -4  -3   6   24.97   13.26
  -3  -3   6  806.09   59.27
  -2  -3   6  560.14   42.40
  -1  -3   6  342.00   27.42
   0  -3   6   28.57    7.51
   1  -3   6 1020.65   67.51
   1  -3   6  986.43   65.61
   2  -3   6   39.73   12.73
   3  -3   6  579.79   44.00
   4  -3   6  126.35   18.79
   5  -3   6  390.88   35.62
   6  -3   6  111.17   19.66
   7  -3   6  233.89   33.74
   7  -3   6  214.82   28.56
   8  -3   6   27.76   25.42
   9  -3   6   62.95   27.05
  10  -3   6   33.10   28.00
  11  -3   6   31.38   28.27
  11   2  -6   39.56   20.55
  10   2  -6  -15.25   14.89
   9   2  -6   39.43   16.01
  -9  -2   6   22.97   20.98
  -8  -2   6   31.80   19.72
   8   2  -6   62.91   17.58
   7   2  -6  266.01   24.64
  -7  -2   6  253.37   30.12
   6   2  -6    2.09    9.74
  -6  -2   6   -6.00   11.57
   5   2  -6   83.35   12.00
  -5  -2   6   58.21   15.91
   4   2  -6  166.74   15.89
  -4  -2   6  146.24   19.66
  -3  -2   6  377.76   31.41
  -2  -2   6  259.74   22.80
  -1  -2   6  384.52   29.81
   0  -2   6   46.38    7.77
   1  -2   6   13.22    8.60
   1  -2   6   14.75    5.77
   2  -2   6  153.57   17.43
   3  -2   6  120.43   16.68
   4  -2   6   89.19   19.63
   5  -2   6  322.27   30.94
   6  -2   6  123.83   20.09
   7  -2   6  101.63   25.11
   7  -2   6   84.28   25.29
   8  -2   6   18.87   18.68
   9  -2   6   49.83   24.01
  10  -2   6   -6.30   25.67
  11  -2   6   25.91   26.24
  11   1  -6   -5.37   19.73
  10   1  -6   69.14   20.17
   9   1  -6    3.42   12.45
  -9  -1   6   26.61   22.54
   8   1  -6  138.96   19.17
  -8  -1   6  124.13   28.18
   7   1  -6   15.92   10.51
  -7  -1   6  -20.84   17.02
   6   1  -6  268.41   42.15
  -6  -1   6  254.21   28.28
   6   1  -6  219.19   21.43
  -5  -1   6  215.90   25.71
   5   1  -6  265.80   21.75
  -4  -1   6  202.59   22.93
   4   1  -6  237.85   18.99
  -3  -1   6   -9.06    7.77
  -2  -1   6  892.59   63.40
  -1  -1   6  799.79   56.43
   0  -1   6   37.14    7.51
   1  -1   6  518.81   37.16
   1  -1   6  478.79   35.86
   2  -1   6  142.70   16.42
   2  -1   6  152.69   13.91
   3  -1   6  975.23   65.30
   4  -1   6   76.60   17.82
   5  -1   6  641.52   49.22
   6  -1   6   95.14   23.10
   7  -1   6   92.33   24.72
   7  -1   6   81.60   24.53
   8  -1   6   62.73   24.23
   9  -1   6  154.69   34.20
  10  -1   6   34.32   24.76
  11  -1   6   -0.15   22.34
  11   0  -6    4.85   19.87
  10   0  -6   -6.56   12.35
   9   0  -6    0.22   10.88
  -9   0   6    0.82   21.97
  -8   0   6  -11.18   21.30
   8   0  -6    7.35   12.38
   7   0  -6   10.93   10.45
   7   0  -6    3.17   23.39
   6   0  -6   90.14   30.24
  -6   0   6   46.93   18.02
   6   0  -6   57.66   10.80
   5   0  -6    0.41    6.84
   5   0  -6   -4.61   15.25
  -4   0   6  124.29   17.69
   4   0  -6  167.61   14.17
   4   0  -6  114.93   27.13
  -3   0   6   -6.44    5.74
  -2   0   6  535.39   40.93
  -1   0   6    6.25    7.40
   0   0   6   22.66    7.24
   0   0   6   29.50    8.49
   1   0   6    4.71    7.04
   1   0   6    1.70    7.73
   2   0   6  408.67   28.45
   2   0   6  318.56   28.01
   3   0   6    6.77    9.44
   5   0   6   20.77   14.08
   6   0   6   87.60   21.06
   7   0   6    6.99   17.69
   8   0   6   63.85   24.74
   9   0   6   17.86   19.78
  10   0   6   19.22   27.21
  11   0   6    3.69   28.37
  10  -1  -6  100.22   23.11
   9  -1  -6    6.55   13.91
   8  -1  -6  132.91   18.04
  -8   1   6  115.16   32.87
  -7   1   6  -17.91   16.30
   7  -1  -6   13.35   10.34
   7  -1  -6   20.51   25.52
   6  -1  -6  261.55   38.69
  -6   1   6  193.31   26.13
   6  -1  -6  214.65   19.81
   5  -1  -6  241.02   19.72
  -5   1   6  198.45   24.23
   5  -1  -6  216.69   35.12
  -4   1   6  179.36   21.42
   4  -1  -6  217.60   16.80
   4  -1  -6  188.28   31.38
   3  -1  -6   -1.37   14.05
  -3   1   6   -0.73    8.00
  -2   1   6  616.69   46.86
  -1   1   6  874.03   63.61
   0   1   6   31.98    7.74
   0   1   6   45.31   11.95
   1   1   6  511.14   40.37
   1   1   6  559.39   37.60
   2   1   6  160.14   17.32
   2   1   6  171.72   16.74
   3   1   6 1219.16   77.25
   3   1   6 1026.19   72.87
   4   1   6  104.66   21.50
   5   1   6  547.02   46.87
   5   1   6  678.33   46.21
   6   1   6   95.20   22.42
   7   1   6   73.94   23.38
   8   1   6   57.19   25.10
   9   1   6  137.82   32.27
  10   1   6   57.08   28.44
  11   1   6  -11.89   27.31
   9  -2  -6   20.26   14.17
   8  -2  -6   26.64   29.73
   8  -2  -6   46.85   13.89
  -8   2   6   41.32   28.84
   7  -2  -6  232.26   22.18
   7  -2  -6  271.98   44.86
  -7   2   6  240.27   33.18
   6  -2  -6   -4.67   17.32
   6  -2  -6    1.89    7.77
  -6   2   6   -4.01   13.27
   5  -2  -6   75.85   24.10
   5  -2  -6   82.31   11.04
  -5   2   6   83.64   18.94
   4  -2  -6  121.16   26.12
  -4   2   6  132.66   18.49
   4  -2  -6  133.58   12.59
  -3   2   6  417.33   36.87
   3  -2  -6  442.78   48.57
   2  -2  -6  287.40   38.36
  -2   2   6  375.76   31.84
  -1   2   6  405.63   36.03
   0   2   6   65.78   13.04
   0   2   6   61.87    8.76
   1   2   6    1.53    6.09
   1   2   6    5.56    7.19
   2   2   6  226.89   21.23
   2   2   6  228.36   21.79
   3   2   6  170.88   17.98
   3   2   6  122.24   17.92
   4   2   6   80.56   18.59
   4   2   6   61.96   13.06
   5   2   6  457.46   38.57
   5   2   6  384.24   33.67
   6   2   6  143.09   22.83
   7   2   6   38.55   18.15
   8   2   6   11.47   20.80
   9   2   6   65.85   28.79
  10   2   6   17.50   28.20
  11   2   6   24.90   27.05
   8  -3  -6   25.94   13.02
  -8   3   6   18.08   25.02
   8  -3  -6   35.11   29.86
  -7   3   6   18.50   21.29
   7  -3  -6   20.79   25.10
   7  -3  -6   17.94   11.05
   6  -3  -6   72.37   28.19
   6  -3  -6   57.53   10.77
  -6   3   6   71.41   21.10
   5  -3  -6   92.64   28.20
   5  -3  -6   69.47   10.56
  -5   3   6   81.07   20.25
   4  -3  -6   70.99   23.16
  -4   3   6   45.81   16.25
   4  -3  -6   56.55    9.16
  -3   3   6  487.84   45.46
   3  -3  -6  583.51   56.97
   2  -3  -6  474.73   50.83
  -2   3   6  486.41   43.37
   1  -3  -6  287.33   38.15
  -1   3   6  360.86   33.68
   0   3   6   43.25   13.98
   0   3   6   41.79    7.67
   1   3   6 1282.85   77.86
   1   3   6 1202.79   86.95
   2   3   6   71.16   14.16
   2   3   6   60.03   14.87
   3   3   6  990.08   72.30
   3   3   6 1036.65   68.94
   4   3   6  163.74   18.75
   4   3   6  144.49   21.08
   5   3   6  371.55   36.31
   5   3   6  421.26   33.38
   6   3   6  110.27   25.83
   7   3   6  212.54   30.04
   8   3   6   16.47   20.76
   9   3   6   43.76   28.77
  10   3   6    8.35   24.49
  11   3   6   26.49   29.91
   9  -4  -6  119.76   42.13
   8  -4  -6    1.25   25.65
  -8   4   6  -27.96   27.39
   7  -4  -6   -2.20   22.03
  -7   4   6  -16.07   18.33
   7  -4  -6   -1.03    9.30
   6  -4  -6   58.02   12.09
   6  -4  -6   42.80   23.11
  -6   4   6   42.07   23.16
   5  -4  -6  217.37   34.77
   5  -4  -6  255.67   18.82
  -5   4   6  179.21   27.60
   4  -4  -6  216.22   16.15
   4  -4  -6  233.60   33.25
  -4   4   6  146.93   25.65
   3  -4  -6  144.36   24.23
  -3   4   6  111.60   23.01
  -2   4   6  380.63   39.34
   2  -4  -6  378.89   42.80
  -1   4   6   32.67    6.99
   1  -4  -6   22.22   13.20
  -1   4   6   22.11   13.39
   0   4   6  586.24   47.66
   1   4   6  124.89   15.87
   1   4   6  107.59   14.04
   2   4   6  637.88   43.56
   2   4   6  495.82   44.01
   3   4   6   99.93   19.20
   3   4   6   74.00   15.01
   4   4   6  719.38   52.01
   4   4   6  569.89   49.68
   5   4   6   65.06   20.39
   5   4   6   48.11   15.13
   6   4   6  107.75   18.88
   6   4   6  131.90   28.32
   7   4   6  145.40   33.66
   8   4   6   69.69   26.48
   9   4   6   15.58   24.87
  10   4   6   42.00   28.21
  11   4   6   -0.20   31.27
   9  -5  -6   34.56   32.35
   8  -5  -6  104.87   37.39
   7  -5  -6  -23.63   20.35
  -7   5   6  -20.68   18.62
  -6   5   6   68.54   28.22
   6  -5  -6   99.81   12.81
   6  -5  -6   96.41   29.33
   5  -5  -6   58.05    9.66
   5  -5  -6   56.97   26.82
  -5   5   6   51.24   26.60
   4  -5  -6  388.52   43.79
   4  -5  -6  347.38   22.85
  -4   5   6  277.87   37.75
   3  -5  -6   -3.27   12.01
  -3   5   6   -8.00   16.02
   2  -5  -6   95.07   21.71
  -2   5   6  131.84   27.99
   1  -5  -6  153.17   25.54
  -1   5   6  169.94   22.61
  -1   5   6  138.13   12.85
   0   5   6  490.02   33.48
   0   5   6  468.27   40.68
   1   5   6  109.98   16.39
   1   5   6  103.17   14.85
   2   5   6  -14.76   10.17
   2   5   6   -3.27   10.62
   3   5   6    1.77   11.12
   3   5   6    9.55   12.02
   4   5   6    3.90   11.98
   4   5   6    4.92   12.95
   5   5   6   20.33   13.90
   5   5   6   39.17   20.41
   6   5   6   73.12   19.81
   6   5   6   51.12   22.69
   7   5   6   12.21   24.89
   8   5   6   97.59   33.43
   9   5   6   -4.12   24.91
  10   5   6   33.75   29.55
   9  -6  -6  125.51   40.48
   8  -6  -6  126.28   36.33
   7  -6  -6  -18.24   22.57
  -7   6   6  -28.42   21.05
  -6   6   6  -22.35   18.95
   6  -6  -6  -12.97   18.82
  -5   6   6  115.96   31.31
   5  -6  -6  150.43   28.25
  -4   6   6  262.62   38.24
   4  -6  -6  333.09   41.29
   4  -6  -6  299.20   20.27
  -3   6   6  135.98   32.56
   3  -6  -6  102.49   22.50
  -2   6   6  300.96   35.88
   2  -6  -6  325.18   37.34
  -1   6   6  151.85   23.98
   1  -6  -6  135.57   24.32
   0  -6  -6  158.11   24.81
   0   6   6  145.88   20.06
   0   6   6  175.11   15.19
   1   6   6   -5.72    9.06
   1   6   6   13.04   11.84
   2   6   6 2687.32  194.05
   2   6   6 3056.24  173.28
   3   6   6   -2.29   12.87
   3   6   6   -0.93   12.49
   4   6   6  523.16   47.90
   4   6   6  598.76   48.02
   5   6   6   24.51   17.61
   5   6   6   41.89   22.13
   6   6   6  488.84   47.17
   6   6   6  416.94   41.04
   7   6   6    1.58   19.25
   8   6   6   57.50   28.74
   9   6   6  -20.84   23.42
  10   6   6   21.21   30.01
  10  -7  -6   44.51   38.47
   9  -7  -6   67.61   36.25
   8  -7  -6  140.95   35.86
   7  -7  -6   15.08   26.05
  -7   7   6  -35.88   28.57
   6  -7  -6  113.17   26.61
  -6   7   6   12.27   25.64
   5  -7  -6   -2.31   19.46
  -5   7   6   -1.08   26.63
   4  -7  -6   50.94   21.21
  -4   7   6   23.09   25.23
  -3   7   6  276.48   38.95
   3  -7  -6  244.69   34.26
   2  -7  -6   -6.15    9.56
  -2   7   6  -21.76   15.46
  -1   7   6    1.12   13.71
   1  -7  -6  -13.74   11.79
   0   7   6   76.56   18.78
   0   7   6   47.16    9.88
   0  -7  -6   38.54   16.87
   1   7   6  564.41   46.18
   1   7   6  538.06   38.69
   2   7   6   93.33   19.38
   2   7   6   71.78   17.11
   3   7   6  699.57   59.16
   3   7   6  768.38   55.68
   4   7   6    1.56   14.76
   4   7   6    1.85   16.60
   5   7   6  100.87   28.13
   5   7   6   76.73   23.06
   6   7   6  -13.66   17.88
   6   7   6   12.03   19.35
   7   7   6  143.12   34.75
   8   7   6    6.68   25.36
   9   7   6   -9.12   30.82
  10   7   6  -36.68   25.09
  10  -8  -6   34.10   38.96
   9  -8  -6  197.96   43.09
   8  -8  -6   61.37   35.13
   7  -8  -6  172.22   36.90
  -6   8   6    7.10   24.49
   6  -8  -6  -20.18   18.06
   5  -8  -6  352.12   45.98
  -5   8   6  329.36   47.67
   4  -8  -6   66.71   26.53
  -4   8   6   63.03   31.60
  -3   8   6  129.94   35.54
   3  -8  -6   98.63   26.97
  -2   8   6  105.53   28.10
   2  -8  -6   28.22   21.50
  -1   8   6   43.67   19.40
   1  -8  -6    7.90   17.25
   0   8   6   36.57    9.87
   0  -8  -6   27.97   17.66
   0   8   6   51.14   16.29
  -1  -8  -6   27.64   15.51
   1   8   6   49.09   16.23
   1   8   6   39.50   11.54
   2   8   6  626.95   53.36
   2   8   6  650.83   47.60
   3   8   6    3.03   14.23
   3   8   6  -10.13   12.91
   4   8   6    2.16   14.33
   4   8   6   14.79   17.72
   5   8   6   -7.85   18.29
   5   8   6  -20.36   18.79
   6   8   6  161.49   29.50
   6   8   6  209.55   40.33
   7   8   6   96.35   31.72
   7   8   6   90.12   27.83
   8   8   6    1.93   29.60
   9   8   6   30.83   34.26
  10   8   6  -32.68   25.94
  10  -9  -6   66.25   43.74
   9  -9  -6   24.49   35.16
   8  -9  -6  127.15   42.20
   7  -9  -6    3.11   27.22
  -6   9   6   -7.05   32.50
   6  -9  -6   12.42   24.51
   5  -9  -6   97.03   29.68
  -5   9   6   80.55   34.54
   4  -9  -6  130.12   32.40
  -4   9   6  191.26   47.12
   3  -9  -6  -10.84   18.71
  -3   9   6   26.83   26.31
  -2   9   6   -0.06   19.99
   2  -9  -6  -12.01   15.80
   1  -9  -6  365.78   41.78
  -1   9   6  323.91   36.94
   0   9   6  118.04   21.59
   0  -9  -6   98.26   24.90
   1   9   6   83.09   14.72
  -1  -9  -6   94.73   23.05
   1   9   6  123.75   21.26
   2   9   6  -10.08   13.46
   2   9   6   27.58   17.01
   3   9   6  342.97   36.96
   3   9   6  356.57   33.97
   4   9   6    3.72   20.78
   4   9   6  -21.87   13.10
   5   9   6  297.16   36.70
   5   9   6  254.89   34.15
   6   9   6   -2.38   21.65
   6   9   6  -16.69   19.30
   7   9   6   53.03   28.28
   7   9   6    5.60   29.38
   8   9   6   58.46   33.96
   9   9   6   31.46   32.10
  10   9   6  -36.08   35.52
  10 -10  -6   26.60   39.49
   9 -10  -6   54.42   39.40
   8 -10  -6   18.94   33.72
   7 -10  -6   38.26   27.94
   6 -10  -6   31.54   27.52
  -6  10   6   79.54   41.82
  -5  10   6   17.71   34.12
  -4  10   6  125.97   37.65
   4 -10  -6  116.15   30.17
  -3  10   6   13.09   25.75
   3 -10  -6    7.81   23.24
  -2  10   6  147.22   27.07
   2 -10  -6  145.86   31.66
   1 -10  -6  -13.79   14.15
  -1  10   6    5.13   17.97
   0 -10  -6  529.48   55.44
   0  10   6  533.79   48.36
   1  10   6   -0.41   11.80
  -1 -10  -6   10.83   15.56
   1  10   6   15.27   17.30
   2  10   6  705.45   51.75
   2  10   6  673.63   58.89
   3  10   6   76.86   23.31
   3  10   6  111.12   28.16
   4  10   6  668.42   56.96
   4  10   6  755.26   64.89
   5  10   6   46.38   25.27
   5  10   6   71.87   29.96
   6  10   6  278.30   39.26
   6  10   6  312.18   39.98
   7  10   6    6.46   30.60
   7  10   6   18.74   28.44
   8  10   6   91.37   37.37
   9  10   6  -30.74   29.95
  10  10   6   21.42   38.74
   9 -11  -6   31.18   41.65
   8 -11  -6  111.23   44.39
   7 -11  -6    3.79   26.74
  -6  11   6   82.07   38.01
   6 -11  -6  120.93   39.37
  -5  11   6    7.64   34.82
   5 -11  -6   16.97   25.77
  -4  11   6   33.08   30.38
   4 -11  -6   11.20   28.78
  -3  11   6   20.28   26.13
   2 -11  -6  224.12   36.28
  -2  11   6  322.57   40.09
  -1  11   6   49.39   21.57
   1 -11  -6   10.76   22.05
   0  11   6   -3.36   13.70
   1  11   6  191.14   27.26
  -1 -11  -6  149.16   27.40
   2  11   6   54.46   22.53
   3  11   6  226.50   28.06
   3  11   6  229.46   33.61
   4  11   6    1.36   18.18
   4  11   6   -0.58   22.97
   5  11   6   71.32   30.62
   5  11   6   15.43   23.53
   6  11   6   61.41   31.73
   6  11   6   32.32   24.97
   7  11   6   19.81   29.99
   7  11   6   -3.33   28.07
   8  11   6  -23.10   26.66
   9  11   6  -29.15   37.31
   9 -12  -6   83.64   46.29
   8 -12  -6   64.08   40.85
   7 -12  -6  175.17   47.92
   6 -12  -6   34.00   32.17
   5 -12  -6   51.09   32.48
  -5  12   6   42.00   36.66
   4 -12  -6  -20.84   22.52
  -4  12   6   15.02   29.79
   3 -12  -6  118.95   33.69
  -3  12   6   98.25   37.32
   2 -12  -6   73.89   26.74
  -2  12   6  105.82   31.92
   1 -12  -6  177.60   34.21
  -1  12   6  197.47   31.83
   0 -12  -6   58.43   23.45
   0  12   6  105.65   26.14
  -1 -12  -6   13.32   18.16
   1  12   6   -7.96   13.29
   2  12   6  -10.27   18.69
   3  12   6    4.62   22.09
   4  12   6   26.25   21.26
   4  12   6   26.31   28.40
   5  12   6   34.18   24.11
   5  12   6   31.58   28.47
   6  12   6  -25.03   27.42
   6  12   6  -29.87   22.66
   7  12   6   14.72   34.24
   7  12   6   -8.14   25.24
   8  12   6  -35.20   27.05
   8  12   6   29.56   32.17
   9  12   6  -13.65   33.37
   9 -13  -6   62.98   47.10
   8 -13  -6  124.62   48.81
   7 -13  -6   65.73   38.16
   6 -13  -6   86.08   34.65
   5 -13  -6  168.76   44.50
  -5  13   6  124.39   49.28
   4 -13  -6   41.53   32.01
  -4  13   6  -21.26   35.81
  -3  13   6   60.57   35.30
   3 -13  -6   74.81   33.90
   2 -13  -6  129.31   31.17
  -2  13   6  139.43   37.45
   1 -13  -6  642.56   69.20
  -1  13   6  636.38   62.74
   0  13   6    9.57   19.85
   0 -13  -6  -28.02   19.57
   1  13   6  189.78   31.13
   2  13   6  -21.33   20.40
   3  13   6  566.47   57.20
   4  13   6    2.94   28.73
   5  13   6  177.72   30.99
   5  13   6  239.97   40.06
   6  13   6    6.48   32.39
   6  13   6  -17.90   23.88
   7  13   6   53.11   36.79
   7  13   6   41.31   34.43
   8  13   6  -23.30   35.47
   8  13   6  -45.14   25.61
   9  13   6    7.33   37.27
   8 -14  -6   74.42   48.27
   7 -14  -6   99.67   45.51
   6 -14  -6   39.58   38.13
  -5  14   6   12.62   37.27
   5 -14  -6   59.75   37.68
   4 -14  -6   -1.65   24.67
  -4  14   6  -16.79   37.36
   3 -14  -6   92.47   35.96
  -3  14   6   30.12   33.83
  -2  14   6   35.28   31.15
   2 -14  -6   27.59   29.09
   1 -14  -6   63.85   30.87
  -1  14   6   95.48   34.52
   0  14   6  184.83   33.01
   0 -14  -6  133.74   31.02
   1  14   6   27.85   24.62
   2  14   6   51.41   24.66
   3  14   6   -1.81   24.97
   4  14   6  171.62   42.08
   5  14   6  -17.93   29.44
   6  14   6  -38.63   27.14
   7  14   6  -34.94   31.79
   7  14   6  -35.73   28.31
   8  14   6  -31.99   28.19
   8  14   6    4.89   35.86
   8 -15  -6  116.99   50.42
   7 -15  -6   60.63   47.81
   6 -15  -6  146.27   52.12
   5 -15  -6   27.36   37.95
  -4  15   6   -9.49   34.18
   4 -15  -6   32.55   36.08
  -3  15   6    7.42   31.53
   3 -15  -6   -4.07   27.96
   2 -15  -6   96.73   36.48
  -2  15   6   95.25   40.67
  -1  15   6   50.42   33.29
   1 -15  -6  161.97   33.47
   0  15   6   39.11   28.05
   1  15   6   27.81   26.95
   2  15   6   15.29   27.19
   3  15   6   41.02   26.58
   4  15   6   -9.88   30.14
   5  15   6    7.88   32.65
   6  15   6  -28.74   35.02
   7  15   6  -20.18   38.22
   8  15   6   -9.79   38.24
   7 -16  -6   86.50   47.46
   6 -16  -6   59.22   47.75
   5 -16  -6  126.97   47.25
   4 -16  -6   92.92   39.59
  -4  16   6   23.58   42.74
   3 -16  -6   52.14   36.09
  -3  16   6  -11.74   35.67
  -2  16   6  -12.28   32.34
   2 -16  -6   47.57   33.11
   1 -16  -6   58.82   30.48
  -1  16   6   15.56   29.36
   0  16   6  126.95   37.42
   1  16   6   -4.07   25.90
   2  16   6  180.03   41.94
   3  16   6  -14.15   29.76
   4  16   6   62.97   37.57
   5  16   6  -24.30   34.01
   6  16   6  153.16   48.62
   7  16   6  -40.47   41.22
   6 -17  -6   90.38   46.66
   5 -17  -6   96.64   51.09
  -4  17   6   18.46   49.42
   4 -17  -6  141.51   48.75
  -3  17   6   54.04   43.28
   3 -17  -6  114.49   45.01
  -2  17   6   -4.98   34.95
   2 -17  -6   30.83   32.84
  -1  17   6   20.21   32.08
   0  17   6   66.85   35.33
   1  17   6  170.29   43.07
   2  17   6   -4.02   30.55
   3  17   6  126.73   41.58
   4  17   6   -4.87   33.39
   5  17   6   59.43   44.05
   6  17   6  -35.49   39.16
   6 -18  -6   18.41   50.19
   5 -18  -6  187.96   59.84
   4 -18  -6  160.49   53.25
  -3  18   6   -5.33   40.29
   3 -18  -6   48.05   40.94
   2 -18  -6   16.61   32.53
  -2  18   6   12.28   37.42
  -1  18   6    4.63   33.16
   0  18   6    2.77   30.94
   1  18   6   -6.60   31.38
   2  18   6   16.99   32.18
   3  18   6  -27.73   33.56
   4  18   6  -39.90   32.28
   5  18   6  -33.26   38.91
   6  18   6   22.17   46.17
   5 -19  -6   53.06   51.26
   4 -19  -6  176.66   57.02
   3 -19  -6  150.05   49.73
  -3  19   6   19.85   46.61
  -2  19   6   -6.97   42.13
  -1  19   6   11.15   38.28
   0  19   6  -22.62   34.88
   1  19   6   28.73   37.57
   2  19   6  -39.71   32.67
   3  19   6   -9.10   36.54
   4  19   6  -29.81   35.69
   5  19   6  -20.43   41.28
   4 -20  -6  134.64   54.43
  -3  20   6   40.17   47.65
   3 -20  -6  121.67   48.23
  -2  20   6   29.58   46.30
  -1  20   6  -26.20   39.84
   0  20   6   27.93   41.96
   1  20   6  -38.07   36.08
   2  20   6    4.08   41.47
  -2  21   6  -56.30   43.96
   0  21   6  -33.26   39.82
   1  21   6   -7.64   41.96
   2  21  -7    1.44   29.86
   3  20  -7   -6.84   27.49
   2  20  -7   31.06   31.24
   1  20  -7   -0.69   27.70
   3 -20   7   13.79   24.23
  -5 -19   7   -5.13    8.73
   4  19  -7   10.43   31.26
   3  19  -7   80.93   34.99
   2  19  -7   55.06   32.40
   1  19  -7   -3.21   26.92
   2 -19   7   12.57   21.52
   3 -19   7   12.13   22.96
   4 -19   7    8.96   28.41
  -5 -18   7  -10.66    8.74
   4  18  -7   67.65   37.27
   3  18  -7   27.08   29.37
   2  18  -7  117.07   34.83
   1  18  -7  -25.39   21.61
   2 -18   7  137.67   28.23
   3 -18   7   -2.58   23.84
   4 -18   7   18.05   28.69
   5 -18   7   -1.85   29.83
  -6 -17   7   -5.45   12.12
  -5 -17   7   -1.80   10.40
   4  17  -7   23.65   31.60
   3  17  -7   58.43   29.51
   2  17  -7   -6.80   23.39
   1  17  -7   -0.57   23.27
   0  17  -7  -16.78   20.42
   1 -17   7   33.26   19.44
   2 -17   7    5.80   20.43
   3 -17   7   22.35   21.54
   4 -17   7   37.21   26.12
   5 -17   7  -18.69   28.47
   6 -17   7   44.75   37.32
  -7 -16   7    0.82   14.22
  -6 -16   7   -1.70   12.50
  -5 -16   7    8.32   11.85
   4  16  -7   45.61   32.07
   3  16  -7   33.38   26.34
   2  16  -7   14.21   24.21
   1  16  -7  -12.51   20.04
   0  16  -7    5.14   20.43
   1 -16   7    5.35   16.38
   2 -16   7    0.11   19.28
   3 -16   7   86.47   30.26
   4 -16   7   20.62   27.95
   5 -16   7   24.84   27.46
   6 -16   7  -17.87   30.48
   7 -16   7   45.20   37.73
  -7 -15   7   15.23   17.46
  -6 -15   7   -1.61   13.97
  -5 -15   7   90.08   19.22
   3  15  -7  102.41   31.43
   2  15  -7    5.87   23.23
   1  15  -7  140.20   27.17
   0  15  -7   43.18   22.72
   2 -15   7   -0.71   14.66
   3 -15   7  126.49   27.06
   4 -15   7    5.29   24.81
   5 -15   7   65.64   30.36
   6 -15   7   -2.13   26.15
   7 -15   7   16.17   30.76
  -8 -14   7    0.52   18.89
  -7 -14   7   24.04   18.62
  -6 -14   7   25.53   16.07
  -5 -14   7   17.99   14.43
   3  14  -7    9.75   24.08
   2  14  -7   67.43   27.56
   1  14  -7   30.57   23.51
   0  14  -7  110.38   27.52
  -1  14  -7  128.29   27.43
   1 -14   7  119.55   29.97
   3 -14   7   -2.28   20.31
   4 -14   7   35.11   22.58
   5 -14   7  105.58   32.08
   6 -14   7   -3.31   24.62
   7 -14   7   32.66   34.09
   8 -14   7   14.55   34.13
  -8 -13   7   33.00   23.54
  -7 -13   7    4.83   15.90
  -6 -13   7  100.01   22.75
  -5 -13   7   21.36   15.60
   3  13  -7   -1.91   21.21
   2  13  -7   47.16   25.74
   1  13  -7  105.68   29.76
   0  13  -7   30.98   21.69
  -1  13  -7   23.19   18.24
   1 -13   7    0.87   14.45
   2 -13   7   27.16   18.85
   4 -13   7  116.17   29.42
   5 -13   7    6.63   20.13
   6 -13   7   73.49   33.48
   7 -13   7  -12.84   24.43
   8 -13   7   16.15   33.93
  -9 -12   7  -12.59   24.05
  -8 -12   7  -22.86   20.79
  -7 -12   7    4.23   16.32
  -6 -12   7  112.93   24.72
  -5 -12   7    7.74   14.82
  -4 -12   7  101.68   20.37
   3  12  -7  -13.60   19.62
   2  12  -7  144.56   32.05
   1  12  -7   19.05   18.40
   0  12  -7  471.12   44.21
  -1  12  -7  104.86   19.97
   1 -12   7   50.73   22.52
   2 -12   7    9.93   16.36
   3 -12   7    8.22   15.56
   4 -12   7   83.30   24.52
   5 -12   7   51.19   23.87
   6 -12   7  -15.06   24.56
   7 -12   7   -4.06   27.73
   8 -12   7   -5.36   30.65
   9 -12   7    4.58   35.23
  -9 -11   7    4.71   25.43
  -8 -11   7   28.79   25.02
  -7 -11   7   48.92   23.22
  -6 -11   7   -2.38   16.46
  -5 -11   7  329.51   33.99
  -4 -11   7   32.02   16.40
   2  11  -7    2.13   18.35
   1  11  -7  904.90   72.56
   0  11  -7   41.36   19.24
  -1  11  -7  174.14   24.84
   1 -11   7  172.09   24.67
   2 -11   7   11.84   14.04
   3 -11   7  114.46   24.28
   4 -11   7   31.48   19.19
   5 -11   7  166.45   31.36
   5 -11   7  248.79   33.08
   6 -11   7   18.97   21.45
   7 -11   7   21.59   25.83
   8 -11   7   23.97   27.71
   9 -11   7   57.71   37.89
 -10 -10   7    2.04   26.60
  -9 -10   7   30.53   26.50
  -8 -10   7    4.09   22.86
  -7 -10   7   53.88   22.51
  -6 -10   7    2.31   18.28
  -5 -10   7    4.83   13.46
  -4 -10   7   -7.96    9.79
  -3 -10   7   -1.60    7.91
   2  10  -7   -6.38   17.01
   1  10  -7   -8.56   15.33
   0  10  -7   35.69   16.48
   1 -10   7   20.85   16.26
  -1  10  -7   17.82   15.15
  -2  10  -7  113.94   22.07
   2 -10   7  113.46   24.33
   3 -10   7   22.74   18.70
   4 -10   7   21.22   20.45
   5 -10   7  155.28   32.70
   6 -10   7    8.71   21.44
   6 -10   7   19.61   20.53
   7 -10   7  127.81   31.89
   8 -10   7  -16.22   24.78
   9 -10   7   76.49   39.40
  10   9  -7    9.88   22.85
 -10  -9   7   30.15   28.53
   9   9  -7   -6.68   18.11
  -9  -9   7   24.13   25.72
  -8  -9   7   24.48   22.41
   8   9  -7   -6.94   18.59
  -7  -9   7   79.02   25.70
  -6  -9   7   33.23   19.00
  -5  -9   7    1.98   12.76
  -4  -9   7    4.26   11.96
  -3  -9   7  217.77   23.10
   1   9  -7   26.74   17.37
   0   9  -7    8.18   14.12
   1  -9   7  248.02   26.52
  -1   9  -7  207.56   24.22
  -2   9  -7   13.95   12.02
   2  -9   7   17.58   16.20
   3  -9   7  153.95   23.41
   4  -9   7   17.23   18.93
   5  -9   7   15.03   21.19
   6  -9   7  137.54   31.99
   6  -9   7  130.24   28.96
   7  -9   7   43.43   27.69
   7  -9   7  103.06   29.36
   8  -9   7   40.39   25.69
   8  -9   7   14.90   26.88
   9  -9   7   23.45   33.89
  10  -9   7   47.86   40.44
 -10  -8   7   28.87   27.08
  10   8  -7  -20.88   19.13
  -9  -8   7   43.09   25.89
   9   8  -7   35.27   22.13
  -8  -8   7  131.59   29.86
   8   8  -7   95.66   23.99
   7   8  -7    6.38   18.46
  -7  -8   7   -6.11   18.10
  -6  -8   7  267.39   32.44
  -5  -8   7   36.74   16.38
  -4  -8   7  404.72   36.18
  -3  -8   7  -13.47   10.26
  -2  -8   7  300.93   27.63
  -1  -8   7   11.90    9.80
   1  -8   7   -2.64   10.08
   2  -8   7  578.28   47.40
   3  -8   7  141.96   22.38
   4  -8   7  398.62   39.30
   5  -8   7   31.86   22.95
   6  -8   7  169.16   28.25
   7  -8   7  109.16   29.53
   7  -8   7  116.18   28.83
   8  -8   7   30.25   24.04
   8  -8   7   34.25   27.53
   9  -8   7   35.60   28.00
   9  -8   7   30.20   32.82
  10  -8   7   28.41   37.31
 -10  -7   7   34.64   26.86
  10   7  -7   15.94   24.24
   9   7  -7  -10.94   14.30
  -9  -7   7   10.34   21.47
  -8  -7   7  149.61   26.34
   8   7  -7  140.31   22.69
   7   7  -7   69.87   20.05
  -7  -7   7   63.17   22.39
   6   7  -7   30.92   15.78
  -6  -7   7   27.30   19.24
  -5  -7   7   -4.31   14.81
  -4  -7   7  247.07   27.40
  -3  -7   7   39.69   15.83
  -2  -7   7   23.82   13.52
  -1  -7   7   87.66   14.27
   0  -7   7   -9.05    7.24
   1  -7   7    4.07    6.66
   1  -7   7  -12.07   10.78
   2  -7   7  109.53   13.77
   2  -7   7  121.74   20.56
   3  -7   7   70.12   23.28
   4  -7   7  119.23   20.84
   5  -7   7    8.24   15.95
   6  -7   7   69.26   25.10
   7  -7   7    7.73   20.86
   7  -7   7    5.07   20.21
   8  -7   7  122.29   27.76
   8  -7   7  160.79   33.09
   9  -7   7   20.14   25.36
   9  -7   7   -5.08   28.33
  10  -7   7   31.65   25.76
 -10  -6   7   17.62   26.50
  10   6  -7  -19.14   15.00
  -9  -6   7  133.94   26.66
   9   6  -7  116.14   26.13
   8   6  -7   35.78   17.20
  -8  -6   7   76.46   23.67
  -7  -6   7    3.62   17.00
   7   6  -7    6.06   12.28
   6   6  -7   -7.24    9.25
  -6  -6   7  -22.12   12.99
  -5  -6   7  277.21   30.48
  -4  -6   7  147.56   20.52
  -3  -6   7   59.50   17.31
  -2  -6   7  243.47   23.86
  -1  -6   7   66.41   13.55
   0  -6   7   71.57   13.57
   1  -6   7   13.71   12.14
   1  -6   7   15.48    7.90
   2  -6   7  221.21   20.57
   2  -6   7  279.06   28.14
   3  -6   7  354.10   35.29
   4  -6   7    4.99   13.14
   5  -6   7   57.64   22.85
   6  -6   7   67.70   21.62
   7  -6   7  143.81   30.82
   7  -6   7  115.91   28.02
   8  -6   7    3.53   24.48
   8  -6   7    0.83   18.16
   9  -6   7   40.72   23.11
   9  -6   7   57.95   33.80
  10  -6   7   -0.65   26.09
  11   5  -7  -16.69   20.22
  10   5  -7   -5.27   16.68
 -10  -5   7   -1.38   23.14
  -9  -5   7   23.43   22.90
   9   5  -7   28.82   18.65
   8   5  -7   17.07   14.94
  -8  -5   7   22.62   19.11
  -7  -5   7   44.86   20.36
   7   5  -7   78.26   18.60
   6   5  -7   14.09   12.93
  -6  -5   7    0.23   15.34
  -5  -5   7   14.01   14.39
   5   5  -7   80.46   15.81
  -4  -5   7   11.78   16.77
  -3  -5   7 1423.99   99.90
  -2  -5   7  105.68   17.02
  -1  -5   7  696.82   51.30
   0  -5   7   17.53    8.66
   1  -5   7 1203.98   77.08
   1  -5   7 1056.06   73.92
   2  -5   7   18.18   13.01
   3  -5   7  859.00   63.13
   4  -5   7   42.01   16.92
   5  -5   7   84.00   22.98
   6  -5   7   31.59   19.89
   7  -5   7   92.36   27.42
   7  -5   7   95.01   24.90
   8  -5   7   16.13   24.13
   8  -5   7   26.78   19.72
   9  -5   7    2.35   20.17
  10  -5   7   24.21   28.03
  11   4  -7   16.99   22.63
  10   4  -7    0.13   16.37
 -10  -4   7    8.25   22.57
  -9  -4   7   32.36   24.15
   9   4  -7   50.15   20.35
   8   4  -7  156.38   22.30
  -8  -4   7  138.58   24.24
   7   4  -7   63.90   17.88
  -7  -4   7   36.60   19.03
  -6  -4   7  -18.11   11.76
   6   4  -7   -5.77    7.77
  -5  -4   7    3.10   15.26
   5   4  -7   28.61   12.58
  -4  -4   7  542.81   45.03
  -3  -4   7   88.86   16.40
  -2  -4   7  896.47   64.63
  -1  -4   7    3.02    7.80
   0  -4   7  619.95   45.09
   1  -4   7  127.93   12.62
   1  -4   7  115.78   15.94
   2  -4   7 2576.31  158.07
   2  -4   7 2245.45  147.82
   3  -4   7   20.39   13.95
   4  -4   7   63.18   18.64
   5  -4   7  158.52   23.83
   6  -4   7  500.48   44.75
   7  -4   7  251.95   31.45
   8  -4   7   41.97   27.86
   8  -4   7   52.41   25.84
   9  -4   7   79.14   27.26
  10  -4   7   16.44   27.26
  11  -4   7   30.78   32.17
  11   3  -7   -2.75   19.82
 -10  -3   7   44.90   25.66
  10   3  -7   23.26   18.98
   9   3  -7   23.57   14.28
  -9  -3   7   43.27   23.58
   8   3  -7   58.34   18.27
  -8  -3   7   42.22   20.22
  -7  -3   7   -6.16   15.29
   7   3  -7   -4.97    9.43
   6   3  -7   67.11   14.48
  -6  -3   7   34.48   15.72
  -5  -3   7  293.21   30.73
   5   3  -7  349.41   26.99
  -4  -3   7   77.95   18.16
  -3  -3   7   -5.68    8.29
  -2  -3   7   92.59   14.68
  -1  -3   7  856.79   60.82
   0  -3   7  225.94   19.55
   1  -3   7   27.80    7.31
   1  -3   7   26.62   11.13
   2  -3   7  103.87   16.54
   3  -3   7  330.00   30.56
   4  -3   7  132.32   19.98
   5  -3   7  109.36   19.46
   6  -3   7  249.06   29.88
   7  -3   7    4.10   15.57
   8  -3   7  177.20   32.23
   8  -3   7  137.94   25.39
   9  -3   7   69.31   28.85
  10  -3   7   71.04   31.87
  11  -3   7   -0.01   22.60
  11   2  -7    5.74   17.52
  10   2  -7   31.50   18.06
  -9  -2   7   36.36   24.83
   9   2  -7   43.67   18.36
   8   2  -7   51.27   17.56
  -8  -2   7   31.48   19.78
   7   2  -7   -3.23    9.41
  -7  -2   7  -21.23   15.64
  -6  -2   7  110.38   20.24
   6   2  -7  118.13   15.30
  -5  -2   7   43.80   16.73
   5   2  -7   67.16   12.99
  -4  -2   7  204.32   22.63
  -3  -2   7   88.13   14.44
  -2  -2   7  843.65   61.09
  -1  -2   7  100.74   13.17
   0  -2   7  477.76   35.58
   1  -2   7    9.32    7.48
   1  -2   7   13.10   10.34
   2  -2   7  241.66   24.73
   2  -2   7  281.78   22.18
   3  -2   7   11.12   10.16
   4  -2   7  630.24   48.15
   6  -2   7   89.98   23.39
   8  -2   7    9.24   20.58
   9  -2   7   44.42   24.19
  10  -2   7   -5.60   24.27
  11  -2   7   15.55   29.82
  11   1  -7   -1.99   15.86
  10   1  -7    9.25   14.81
   9   1  -7   80.10   21.04
  -9  -1   7   45.60   27.05
  -8  -1   7   -7.07   17.49
   8   1  -7   13.84   14.04
  -7  -1   7   45.71   23.65
   7   1  -7   74.80   15.17
   6   1  -7  181.52   18.43
  -6  -1   7  175.72   24.16
  -5  -1   7  349.70   34.57
   5   1  -7  391.68   28.61
  -4  -1   7   25.42   14.74
  -3  -1   7  941.52   68.60
  -2  -1   7  470.99   37.05
  -1  -1   7 1646.83  111.64
   0  -1   7  385.19   30.20
   1  -1   7  314.03   26.80
   1  -1   7  319.27   26.81
   2  -1   7  102.80   13.35
   2  -1   7  119.11   16.60
   3  -1   7  679.97   43.30
   3  -1   7  555.87   45.25
   4  -1   7   43.67    7.76
   4  -1   7   21.62   13.77
   5  -1   7  337.26   32.61
   6  -1   7  248.43   28.67
   7  -1   7   49.73   20.87
   8  -1   7    5.93   20.30
   9  -1   7   35.29   20.41
  10  -1   7   65.22   28.10
  11  -1   7  -12.15   28.66
  11   0  -7   52.96   23.26
  10   0  -7   -4.02   16.44
   9   0  -7   61.69   18.12
  -9   0   7   58.34   29.54
   8   0  -7   -5.15   12.40
  -8   0   7  -21.99   17.63
   7   0  -7  146.30   17.68
  -7   0   7  118.55   24.50
   7   0  -7  213.28   42.99
  -6   0   7   -5.32   14.33
   6   0  -7   13.05    8.69
   6   0  -7    4.19   20.24
  -5   0   7   56.67   17.83
   5   0  -7   72.41   10.66
   4   0  -7   -0.24    5.74
  -3   0   7   -0.11   10.75
  -2   0   7  -12.41    7.54
  -1   0   7    3.51    8.87
   0   0   7    5.68    8.11
   0   0   7   13.30    7.69
   1   0   7  683.60   51.42
   1   0   7  694.75   47.56
   2   0   7   15.58    8.66
   2   0   7    3.66    7.93
   3   0   7  154.83   15.07
   3   0   7   97.82   16.72
   4   0   7   -3.27   12.07
   4   0   7    0.55    6.26
   5   0   7  208.66   25.28
   6   0   7   28.01   18.77
   7   0   7  225.43   28.89
   8   0   7   -1.46   15.33
   9   0   7   84.61   28.06
  10   0   7  -14.10   24.86
  11   0   7   21.15   30.57
  10  -1  -7   21.16   15.72
  -9   1   7   62.94   28.76
   9  -1  -7   53.43   16.42
   8  -1  -7   13.81   11.56
  -8   1   7   -9.79   19.13
   7  -1  -7   92.76   17.07
   7  -1  -7   44.08   29.95
  -7   1   7   45.69   22.45
   6  -1  -7  219.56   37.93
   6  -1  -7  222.06   20.06
  -6   1   7  170.61   25.39
   5  -1  -7  424.30   53.44
  -5   1   7  355.99   36.93
   5  -1  -7  448.20   30.31
   4  -1  -7   56.22    9.79
   4  -1  -7   32.58   23.38
  -4   1   7   39.78   14.46
  -3   1   7  806.55   60.75
  -2   1   7  404.27   34.12
  -1   1   7 1883.98  129.40
   0   1   7  367.18   33.17
   0   1   7  395.07   28.58
   1   1   7  306.62   27.75
   1   1   7  320.93   25.89
   2   1   7  137.73   15.96
   2   1   7  129.91   15.98
   3   1   7  757.11   55.66
   3   1   7  799.80   55.20
   4   1   7   35.30   14.06
   5   1   7  297.39   30.49
   6   1   7  217.52   27.23
   7   1   7   54.23   23.93
   8   1   7   10.89   18.04
   9   1   7   13.76   22.22
  10   1   7   71.76   29.28
  11   1   7  -18.11   24.71
   9  -2  -7   50.58   17.20
   8  -2  -7   28.51   29.98
   8  -2  -7   54.98   15.82
  -8   2   7   24.23   26.99
   7  -2  -7   -3.91   21.05
  -7   2   7  -31.31   17.70
   7  -2  -7    2.28    8.50
   6  -2  -7  152.07   37.00
   6  -2  -7  113.94   14.74
  -6   2   7  120.25   25.38
  -5   2   7   56.02   18.50
   5  -2  -7   74.34   26.13
   5  -2  -7   76.96   10.86
   4  -2  -7  255.74   36.96
  -4   2   7  259.71   28.11
   4  -2  -7  297.84   20.44
   3  -2  -7  113.59   26.89
  -3   2   7  111.19   18.17
  -2   2   7  851.61   65.13
  -1   2   7   78.65   16.86
   0   2   7  487.62   40.36
   0   2   7  436.19   32.44
   1   2   7    7.57    9.38
   1   2   7    3.64    6.90
   2   2   7  427.08   33.87
   2   2   7  396.05   32.94
   3   2   7    9.24    9.60
   3   2   7    4.13   11.83
   4   2   7  654.96   45.64
   4   2   7  546.91   46.10
   5   2   7    8.30   10.57
   5   2   7   19.81   15.34
   6   2   7   53.32   20.03
   7   2   7   36.06   21.04
   8   2   7   -1.13   22.09
   9   2   7   45.16   27.77
  10   2   7   17.96   28.57
  11   2   7    1.44   30.46
   8  -3  -7   49.37   32.37
  -8   3   7   41.68   30.13
   8  -3  -7   71.87   16.51
  -7   3   7  -14.22   17.66
   7  -3  -7   -9.06    8.56
   7  -3  -7    1.53   23.03
  -6   3   7   46.61   20.36
   6  -3  -7   64.28   27.35
   6  -3  -7   61.57   12.33
   5  -3  -7  400.16   48.34
  -5   3   7  307.48   36.05
   5  -3  -7  387.22   26.75
  -4   3   7   56.26   19.35
   4  -3  -7   75.46   23.56
  -3   3   7    2.09   13.53
   3  -3  -7    8.69   16.84
  -2   3   7  125.91   25.54
   2  -3  -7  118.86   29.29
  -1   3   7  682.17   56.10
   0   3   7  324.24   31.21
   0   3   7  301.64   24.14
   1   3   7   34.72   12.46
   1   3   7   36.48   10.32
   2   3   7  151.92   18.63
   2   3   7  123.68   16.92
   3   3   7  472.83   38.58
   3   3   7  459.96   38.49
   4   3   7  191.88   24.18
   4   3   7  153.74   19.68
   5   3   7  137.07   18.10
   5   3   7  119.12   21.49
   6   3   7  185.31   27.03
   7   3   7   -9.74   20.60
   8   3   7  174.75   29.21
   9   3   7   90.40   32.43
  10   3   7   52.21   32.72
  11   3   7  -14.40   24.33
   9  -4  -7   48.48   35.18
  -8   4   7  118.22   35.97
   8  -4  -7  162.31   39.39
  -7   4   7   36.32   26.58
   7  -4  -7   55.24   30.22
  -6   4   7   -1.71   16.59
   6  -4  -7    1.85    7.41
   6  -4  -7   -0.87   19.01
  -5   4   7   14.88   19.28
   5  -4  -7   44.32   23.05
   5  -4  -7   31.50    8.32
   4  -4  -7  420.34   47.98
  -4   4   7  337.79   38.90
   3  -4  -7  106.76   25.47
  -3   4   7  108.42   26.16
   2  -4  -7  870.04   77.36
  -2   4   7  707.36   64.36
   1  -4  -7   -4.28   11.97
  -1   4   7    9.22   15.52
  -1   4   7    9.80    6.07
   0   4   7  699.19   53.87
   0   4   7  599.96   42.99
   1   4   7  204.16   22.49
   1   4   7  201.72   20.93
   2   4   7 3073.68  210.15
   2   4   7 3209.49  188.48
   3   4   7   10.68   12.62
   3   4   7   24.87   13.92
   4   4   7   76.56   17.93
   4   4   7  101.12   21.58
   5   4   7  205.08   26.49
   5   4   7  189.31   22.52
   6   4   7  492.35   45.97
   7   4   7  189.69   30.08
   8   4   7   15.56   23.06
   9   4   7   97.39   33.03
  10   4   7   -1.47   25.02
   9  -5  -7   42.26   37.25
   8  -5  -7   31.74   29.19
  -8   5   7   30.00   33.53
  -7   5   7    0.77   23.32
   7  -5  -7   34.00   29.39
   6  -5  -7   13.99   18.95
  -6   5   7  -23.74   17.30
   5  -5  -7   57.20   23.30
  -5   5   7   15.88   24.13
   5  -5  -7   50.67    9.12
  -4   5   7    8.45   19.84
   4  -5  -7   40.18   20.01
  -3   5   7  874.37   77.50
   3  -5  -7 1004.25   89.90
  -2   5   7   92.84   23.93
   2  -5  -7   99.45   23.70
  -1   5   7  567.13   39.85
   1  -5  -7  570.09   61.82
  -1   5   7  722.60   56.98
   0   5   7   21.57   12.53
   0   5   7   19.60    9.49
   1   5   7 1421.08   92.19
   1   5   7 1512.68  104.45
   2   5   7    3.37   10.37
   2   5   7    6.56   12.00
   3   5   7 1240.44   82.52
   3   5   7 1171.04   87.70
   4   5   7   56.93   20.96
   4   5   7   44.74   16.65
   5   5   7   98.73   20.81
   5   5   7   99.89   26.58
   6   5   7    8.45   22.40
   6   5   7    9.82   15.83
   7   5   7   88.66   29.21
   8   5   7   -0.93   25.48
   9   5   7   -6.95   24.96
  10   5   7    2.51   26.57
   9  -6  -7  158.42   40.40
   8  -6  -7  101.66   37.21
  -7   6   7  -39.08   27.01
   7  -6  -7   -3.57   21.79
   6  -6  -7  -12.54   19.70
   5  -6  -7  237.07   35.64
  -5   6   7  140.23   33.91
   4  -6  -7  177.97   29.58
  -4   6   7  141.78   30.30
   3  -6  -7   68.15   21.82
  -3   6   7   56.90   26.14
  -2   6   7  312.76   39.49
   2  -6  -7  305.42   39.15
  -1   6   7   39.79   18.13
   1  -6  -7   39.70   17.07
   0   6   7   86.79   17.92
   0   6   7   64.56   11.71
   1   6   7   27.76   13.14
   1   6   7   16.18   10.18
   2   6   7  403.40   38.77
   2   6   7  498.52   38.71
   3   6   7  521.36   43.20
   3   6   7  484.45   44.03
   4   6   7    0.91   15.29
   4   6   7    1.68   15.14
   5   6   7   53.97   21.11
   5   6   7   74.22   25.37
   6   6   7   74.38   22.36
   6   6   7   65.88   25.79
   7   6   7  165.30   36.93
   8   6   7   16.01   25.06
   9   6   7   36.75   28.27
  10   6   7  -13.00   24.76
  10  -7  -7   88.41   43.87
   9  -7  -7   78.49   39.98
   8  -7  -7  190.22   40.42
  -7   7   7   22.36   32.70
   7  -7  -7   68.14   32.43
  -6   7   7   16.37   30.72
   6  -7  -7   40.48   24.40
   5  -7  -7    5.88   20.62
  -5   7   7    3.28   21.43
  -4   7   7  193.12   41.61
   4  -7  -7  177.57   32.60
  -3   7   7   38.45   27.15
   3  -7  -7   42.53   20.33
  -2   7   7   18.61   21.03
   2  -7  -7   66.60   22.94
  -1   7   7  119.95   23.42
   1  -7  -7   86.62   22.68
   0   7   7    1.56   10.94
   0   7   7   -1.27    6.96
   0  -7  -7   -7.60   12.58
   1   7   7    1.70    8.91
   1   7   7   -1.50   11.43
   2   7   7  227.08   25.39
   2   7   7  220.72   27.22
   3   7   7  104.57   21.66
   3   7   7  135.32   25.88
   4   7   7  236.73   28.99
   4   7   7  239.32   30.13
   5   7   7    9.71   21.90
   5   7   7    9.43   19.29
   6   7   7   66.38   27.92
   6   7   7   62.80   22.28
   7   7   7   11.12   25.34
   8   7   7  241.68   48.42
   9   7   7    1.04   33.21
  10   7   7    7.49   36.77
  10  -8  -7   49.28   39.53
   9  -8  -7  103.42   40.36
   8  -8  -7  155.10   38.31
  -7   8   7   -7.04   33.40
   7  -8  -7   70.34   31.33
  -6   8   7  169.59   42.75
   6  -8  -7  239.90   37.37
   4  -8  -7  348.19   45.04
  -4   8   7  380.39   49.69
  -3   8   7  -25.84   22.65
   3  -8  -7   -1.83   16.13
  -2   8   7  417.44   46.19
   2  -8  -7  327.12   44.43
   1  -8  -7    9.87   14.83
  -1   8   7    4.87   18.55
   0  -8  -7  290.55   38.01
   0   8   7  292.30   32.76
   0   8   7  355.59   24.96
   1   8   7   12.15    9.56
   1   8   7    6.88   13.16
   2   8   7  867.74   63.25
   2   8   7  965.83   72.58
   3   8   7  265.17   31.21
   3   8   7  234.76   28.17
   4   8   7  522.87   50.31
   4   8   7  561.43   48.94
   5   8   7   17.07   23.34
   5   8   7   14.27   20.28
   6   8   7  206.69   35.20
   6   8   7  210.57   30.80
   7   8   7  148.80   38.18
   8   8   7   27.05   34.07
   9   8   7   -2.47   31.22
  10   8   7  -24.67   35.85
  10  -9  -7   80.42   44.89
   9  -9  -7   39.24   36.09
   8  -9  -7   42.35   33.85
   7  -9  -7   68.41   31.19
  -7   9   7   36.20   33.43
   6  -9  -7   53.70   27.44
  -6   9   7   12.42   35.24
   5  -9  -7   35.16   25.23
  -5   9   7   20.98   29.55
   4  -9  -7   -0.28   16.54
  -4   9   7  -12.05   26.08
   3  -9  -7  202.77   34.96
   2  -9  -7   14.77   17.75
  -2   9   7   37.70   25.49
   1  -9  -7   37.47   22.76
  -1   9   7   64.71   23.52
   0   9   7    4.09   13.17
   0  -9  -7    5.83   16.22
   1   9   7  361.57   35.65
   1   9   7  289.53   27.76
   2   9   7   34.64   16.67
   2   9   7   17.43   15.17
   3   9   7  258.40   30.10
   3   9   7  279.38   33.91
   4   9   7    4.46   18.96
   4   9   7   24.87   22.04
   5   9   7   22.26   23.08
   5   9   7    2.05   22.95
   6   9   7  200.36   41.92
   6   9   7  159.34   32.27
   7   9   7   76.85   33.24
   7   9   7  100.03   29.67
   8   9   7    3.89   28.58
   9   9   7  -29.05   35.69
  10   9   7   -6.02   35.60
  10 -10  -7   69.88   44.58
   9 -10  -7   83.06   43.72
   8 -10  -7   34.79   35.95
   7 -10  -7   58.39   34.53
  -6  10   7   45.41   40.07
   6 -10  -7   23.28   28.78
   5 -10  -7   14.41   21.85
  -5  10   7    7.21   29.83
   4 -10  -7   13.98   22.62
  -4  10   7   -8.86   27.68
   3 -10  -7   -7.31   16.06
  -3  10   7   -8.94   24.27
   2 -10  -7   -1.52   20.92
  -2  10   7    8.95   20.72
  -1  10   7   -6.44   18.21
   1 -10  -7   -4.02   14.62
   0 -10  -7   36.70   20.59
   0  10   7   47.78   20.71
   1  10   7   40.51   20.41
  -1 -10  -7   41.92   19.63
   2  10   7  169.71   23.96
   2  10   7  190.55   26.60
   3  10   7   56.08   23.77
   3  10   7   25.49   19.13
   4  10   7   42.85   26.64
   4  10   7    7.64   19.84
   5  10   7  176.84   31.17
   5  10   7  221.50   36.98
   6  10   7   -3.61   25.30
   6  10   7    6.60   23.50
   7  10   7  236.12   37.85
   7  10   7  231.52   48.61
   8  10   7  -13.24   30.03
   9  10   7   11.59   36.10
   9 -11  -7   62.34   44.33
   8 -11  -7   70.69   40.06
   7 -11  -7   78.66   34.46
   6 -11  -7   33.69   26.47
  -5  11   7  368.84   55.75
   5 -11  -7  288.94   45.47
  -4  11   7   22.61   32.53
   4 -11  -7   16.92   26.60
  -3  11   7  133.65   39.26
   3 -11  -7   62.13   31.88
  -2  11   7   13.33   21.12
  -1  11   7  859.90   72.04
   1 -11  -7  725.47   77.88
   0  11   7   43.63   21.72
   0 -11  -7   20.26   20.02
   1  11   7  191.18   27.92
  -1 -11  -7  207.63   30.88
   2  11   7   31.68   18.80
   3  11   7  165.75   26.39
   3  11   7  175.29   28.69
   4  11   7   19.33   20.77
   4  11   7   30.00   27.09
   5  11   7  323.77   42.52
   5  11   7  243.01   34.61
   6  11   7    9.79   27.46
   6  11   7   28.83   30.97
   7  11   7   38.72   31.37
   7  11   7   22.06   33.50
   8  11   7   22.18   33.57
   9  11   7   16.62   41.38
   9 -12  -7   16.03   38.04
   8 -12  -7   30.86   38.18
   7 -12  -7   73.03   35.00
  -6  12   7   43.78   40.39
   6 -12  -7  148.76   39.97
  -5  12   7   11.54   35.34
   5 -12  -7   35.70   30.46
   4 -12  -7  123.70   35.41
  -4  12   7  119.63   44.15
   3 -12  -7   15.81   20.42
  -3  12   7  -13.21   30.63
  -2  12   7  127.66   37.06
   2 -12  -7  164.13   39.03
  -1  12   7   12.52   20.12
   1 -12  -7   37.23   23.51
   0  12   7  587.42   54.09
   0 -12  -7  443.47   55.34
  -1 -12  -7   83.87   24.81
   2  12   7   34.65   20.71
   3  12   7   -3.63   23.82
   4  12   7  130.69   24.87
   4  12   7  164.90   39.09
   5  12   7   50.87   31.71
   5  12   7   63.27   27.21
   6  12   7   -3.51   30.34
   6  12   7   -9.22   24.44
   7  12   7  -22.09   29.71
   7  12   7  -27.48   23.14
   8  12   7    4.53   34.50
   9  12   7  -44.49   37.22
   8 -13  -7  113.92   48.28
   7 -13  -7   38.47   34.41
   6 -13  -7  159.98   43.65
   5 -13  -7  172.26   38.15
  -5  13   7   40.34   44.14
  -4  13   7   27.38   42.91
   4 -13  -7   19.99   28.55
   3 -13  -7    7.66   27.27
  -3  13   7   -7.33   31.43
   2 -13  -7   53.84   32.62
  -2  13   7   96.26   37.04
  -1  13   7  177.72   35.02
   1 -13  -7  229.59   38.91
   0  13   7   44.40   27.56
   0 -13  -7   27.25   26.27
   1  13   7    7.71   18.46
   2  13   7   33.89   24.74
   3  13   7  -11.89   20.01
   4  13   7  174.60   40.80
   5  13   7   -9.89   29.87
   6  13   7  115.60   40.53
   6  13   7  118.04   33.59
   7  13   7  -25.88   27.49
   7  13   7  -37.09   32.94
   8  13   7  -14.47   34.55
   8  13   7   -2.98   32.28
   9  13   7  -31.22   40.60
   8 -14  -7   75.59   48.51
   7 -14  -7  118.83   45.18
   6 -14  -7   86.88   42.87
  -5  14   7  -15.08   37.36
   5 -14  -7   44.62   31.97
   4 -14  -7   52.85   35.67
  -4  14   7    8.72   41.51
   3 -14  -7    6.52   29.86
  -3  14   7  -16.01   32.45
   2 -14  -7  100.36   36.38
  -2  14   7   70.00   35.50
  -1  14   7   21.37   30.61
   1 -14  -7   20.56   28.22
   0 -14  -7  253.27   39.37
   0  14   7  146.70   38.23
   1  14   7  181.35   38.67
   2  14   7   94.21   32.19
   3  14   7   -1.53   26.58
   4  14   7   48.73   33.27
   5  14   7  134.32   42.26
   6  14   7  -10.59   34.31
   7  14   7    6.96   38.16
   8  14   7  -24.28   37.06
   7 -15  -7  103.07   50.71
   6 -15  -7   84.75   45.63
   5 -15  -7  177.19   43.86
  -5  15   7   88.21   48.46
   4 -15  -7   59.26   38.23
  -4  15   7   -4.05   38.91
  -3  15   7   98.17   43.82
   3 -15  -7  124.76   42.21
   2 -15  -7   63.51   33.62
  -2  15   7   -7.81   32.71
  -1  15   7  204.58   39.41
   1 -15  -7  177.15   37.33
   0  15   7   75.60   32.61
   1  15   7  218.54   36.83
   2  15   7   18.76   27.77
   3  15   7  153.99   31.91
   4  15   7  -15.67   31.44
   5  15   7   76.95   35.83
   6  15   7  -19.31   34.76
   7  15   7   11.25   42.65
   7 -16  -7   75.69   50.19
   6 -16  -7   42.41   40.26
   5 -16  -7  102.78   46.93
  -4  16   7    4.10   41.62
   4 -16  -7   92.67   42.99
   3 -16  -7   10.06   33.63
  -3  16   7   -2.40   41.75
  -2  16   7   -8.99   35.71
   2 -16  -7   18.04   30.35
   1 -16  -7   -4.11   28.08
  -1  16   7  -31.52   28.03
   0  16   7   37.76   32.01
   1  16   7    6.45   27.82
   2  16   7   32.61   31.84
   3  16   7  112.05   39.36
   4  16   7   43.60   37.44
   5  16   7   14.27   35.02
   6  16   7    9.87   41.71
   7  16   7   36.65   43.60
   6 -17  -7   87.48   52.88
   5 -17  -7   97.93   50.80
  -4  17   7  -23.64   42.11
   4 -17  -7  126.50   47.37
   3 -17  -7  148.65   45.99
  -3  17   7   40.03   46.42
   2 -17  -7   -3.63   30.56
  -2  17   7  -39.46   32.23
  -1  17   7  -20.60   30.01
   0  17   7   13.01   31.57
   1  17   7   61.81   35.45
   2  17   7    2.05   31.61
   3  17   7   12.04   29.72
   4  17   7   32.85   37.74
   5  17   7  -37.99   33.59
   6  17   7   27.81   43.01
   5 -18  -7  118.81   52.96
  -4  18   7   87.91   60.01
   4 -18  -7  195.13   48.28
   3 -18  -7   86.12   43.93
  -3  18   7    2.21   43.29
  -2  18   7   85.27   48.62
   2 -18  -7  152.05   38.95
  -1  18   7  -14.75   34.59
   0  18   7   34.74   33.45
   1  18   7  -30.80   30.23
   2  18   7  151.69   44.89
   3  18   7  -16.22   34.89
   4  18   7  -19.22   35.51
   5  18   7  -26.02   37.00
   5 -19  -7   49.92   48.34
   4 -19  -7  135.07   54.35
   3 -19  -7  208.11   46.92
  -3  19   7   86.91   54.29
  -2  19   7  -16.81   44.64
  -1  19   7  -23.49   40.83
   1  19   7   21.95   34.31
   2  19   7  -26.48   33.92
   3  19   7  -12.35   36.69
   4  19   7  -25.24   38.99
   3 -20  -7   49.26   44.54
  -3  20   7  -29.03   44.95
  -2  20   7    9.84   45.10
  -1  20   7  -58.98   39.87
   0  20   7  -39.07   39.46
   1  20   7  -45.72   35.97
   2  20   7  -28.01   39.41
   3  20   7  -23.90   38.98
  -2  21   7  -37.80   46.60
  -1  21   7  -56.89   42.89
   0  21   7  -69.48   38.76
   2  20  -8   59.48   32.52
   3 -20   8   12.22   23.26
  -4 -19   8   -5.84    8.91
   2  19  -8   58.69   30.94
   1  19  -8   24.83   26.69
   2 -19   8   14.62   20.32
   3 -19   8    4.32   21.91
   4 -19   8   68.44   32.02
  -5 -18   8  -12.97   10.70
  -4 -18   8   -5.30    9.68
   2  18  -8   26.00   26.41
   1  18  -8   49.97   29.87
   2 -18   8   10.13   19.79
   3 -18   8  114.82   32.01
   4 -18   8   -5.10   24.79
   5 -18   8   39.32   33.39
  -6 -17   8   -2.89   12.49
  -5 -17   8   24.37   14.65
  -4 -17   8   -7.41   10.23
   3  17  -8  102.52   34.18
   2  17  -8   42.68   26.78
   1  17  -8   52.77   28.34
   1 -17   8   71.14   21.91
   2 -17   8    8.76   17.67
   3 -17   8   64.81   28.02
   4 -17   8   20.55   27.07
   5 -17   8   -7.20   24.78
   6 -17   8   -8.70   32.08
  -7 -16   8   -3.20   15.11
  -6 -16   8   25.40   16.44
  -5 -16   8  -13.93   11.91
  -4 -16   8   62.32   16.09
   2  16  -8   85.77   29.22
   1  16  -8   -3.68   24.07
   0  16  -8   21.49   21.86
   2 -16   8   93.82   26.46
   3 -16   8   22.10   22.75
   4 -16   8    4.03   26.03
   5 -16   8   33.40   27.81
   6 -16   8    7.82   31.73
  -7 -15   8   -7.11   14.58
  -6 -15   8  -10.96   13.23
  -5 -15   8    2.04   12.29
  -4 -15   8   -3.95   11.90
   2  15  -8   33.38   22.72
   1  15  -8    7.25   24.05
   0  15  -8   46.80   22.44
   3 -15   8   -0.48   21.13
   4 -15   8   72.54   27.22
   5 -15   8  -23.05   24.01
   6 -15   8   60.31   34.68
   7 -15   8   -8.68   26.33
  -8 -14   8  -13.78   18.10
  -7 -14   8   -2.65   17.12
  -6 -14   8   58.10   20.51
  -5 -14   8   15.98   15.09
  -4 -14   8   54.97   17.16
   2  14  -8   26.92   25.14
   1  14  -8   51.65   24.19
   0  14  -8  210.36   31.43
   1 -14   8   16.26   28.39
   4 -14   8    0.45   21.54
   5 -14   8   41.67   27.60
   6 -14   8   -1.11   23.57
   7 -14   8  -18.06   29.07
   8 -14   8    7.13   30.30
  -8 -13   8   -7.55   21.35
  -7 -13   8   47.86   22.38
  -6 -13   8   30.62   19.14
  -5 -13   8  278.53   30.47
  -4 -13   8   22.94   15.54
  -3 -13   8  102.66   17.53
   2  13  -8   -9.12   20.70
   1  13  -8  401.34   42.52
   0  13  -8   12.01   20.85
   1 -13   8  173.69   28.46
  -1  13  -8  135.19   23.83
   2 -13   8    6.43   19.28
   3 -13   8    6.09   18.89
   5 -13   8   33.30   26.81
   6 -13   8   15.11   23.01
   7 -13   8  -11.73   26.94
   8 -13   8   -4.38   32.01
  -9 -12   8    8.24   25.61
  -8 -12   8   -1.27   22.01
  -7 -12   8   19.95   20.92
  -6 -12   8   30.48   19.87
  -5 -12   8    4.61   15.75
  -4 -12   8   15.81   15.71
  -3 -12   8   10.88   14.04
   1  12  -8   11.33   18.94
   0  12  -8   49.10   22.41
   1 -12   8  343.22   35.81
  -1  12  -8  297.40   33.65
   2 -12   8   -0.91   16.90
   3 -12   8   37.18   20.90
   4 -12   8    3.46   20.34
   6 -12   8  -23.23   23.23
   7 -12   8   66.87   33.42
   8 -12   8   -7.07   29.71
   9 -12   8   41.90   37.62
  -9 -11   8    0.85   26.01
  -8 -11   8   -8.40   22.08
  -7 -11   8   15.28   21.31
  -6 -11   8   -3.45   16.79
  -5 -11   8   35.25   18.89
  -4 -11   8   55.28   17.99
  -3 -11   8   56.75   17.23
  -2 -11   8    7.03   10.36
   1  11  -8   72.90   23.19
   0  11  -8  108.34   20.64
   1 -11   8  102.77   24.82
  -1  11  -8   88.87   21.28
   2 -11   8   81.20   21.29
   3 -11   8    5.92   18.61
   4 -11   8   49.74   23.06
   5 -11   8   28.98   23.08
   6 -11   8  164.31   35.03
   6 -11   8  124.04   34.21
   7 -11   8  -18.88   24.41
   8 -11   8   70.34   33.51
   9 -11   8    1.25   31.25
  -9 -10   8   17.93   25.45
  -8 -10   8  131.66   32.99
  -7 -10   8   -3.31   19.67
  -6 -10   8  108.38   23.11
  -5 -10   8   -7.36   14.97
  -4 -10   8  200.30   25.77
  -3 -10   8   31.96   12.95
  -2 -10   8  161.70   20.22
  -1 -10   8   40.17   12.52
   1 -10   8   21.44   18.20
   2 -10   8  184.28   24.71
   3 -10   8   96.84   26.62
   4 -10   8  118.79   29.03
   5 -10   8   16.00   20.38
   6 -10   8   20.42   21.85
   7 -10   8   11.38   22.44
   7 -10   8    4.32   24.83
   8 -10   8    3.04   26.69
   9 -10   8   -8.92   29.91
 -10  -9   8    1.67   27.22
  -9  -9   8   53.69   26.69
  -8  -9   8   51.77   25.59
  -7  -9   8    6.69   18.84
  -6  -9   8   16.61   17.69
  -5  -9   8   89.44   19.01
  -4  -9   8   -9.00   13.47
  -3  -9   8   75.04   15.14
  -2  -9   8  200.99   23.07
  -1  -9   8  208.53   22.49
   0  -9   8    1.91   10.35
   1  -9   8   96.50   15.28
   1  -9   8  108.22   19.73
   2  -9   8   64.23   21.52
   3  -9   8   99.32   27.34
   4  -9   8  234.25   30.66
   5  -9   8  169.18   33.35
   6  -9   8  119.20   31.26
   7  -9   8    0.62   21.93
   7  -9   8   -6.58   21.76
   8  -9   8  150.55   35.70
   8  -9   8  125.30   32.99
   9  -9   8    2.39   30.32
  10  -9   8   25.39   37.27
 -10  -8   8   -2.10   24.65
  -9  -8   8   50.73   27.05
  -8  -8   8  105.35   28.83
  -7  -8   8   34.15   20.32
  -6  -8   8   13.10   16.01
  -5  -8   8    6.70   17.65
  -4  -8   8   63.91   18.23
  -3  -8   8   10.05   13.07
  -2  -8   8  104.83   18.03
  -1  -8   8  150.96   18.63
   0  -8   8   18.55   10.90
   1  -8   8   35.50   15.33
   1  -8   8   43.18   11.81
   2  -8   8  300.73   32.44
   3  -8   8  206.09   27.38
   4  -8   8   11.23   17.26
   5  -8   8  237.74   32.19
   6  -8   8   27.43   23.34
   7  -8   8  162.75   32.54
   7  -8   8  213.08   32.44
   8  -8   8   20.99   26.89
   8  -8   8   12.32   25.03
   9  -8   8  111.68   38.99
   9  -8   8   77.31   32.02
 -10  -7   8   15.71   25.40
  10   7  -8  -24.27   16.81
  -9  -7   8   37.01   24.55
   9   7  -8   23.05   19.28
  -8  -7   8   39.37   22.50
   8   7  -8   10.39   17.25
  -7  -7   8  283.14   34.05
  -6  -7   8   10.94   19.23
  -5  -7   8  101.67   23.32
  -4  -7   8  -17.07   12.66
  -3  -7   8  490.67   41.24
  -1  -7   8   -3.04   10.57
   0  -7   8  214.32   21.54
   1  -7   8   81.58   20.54
   1  -7   8   83.27   12.04
   2  -7   8   62.22   20.64
   2  -7   8   27.59   10.37
   3  -7   8  161.58   26.34
   4  -7   8   70.44   24.20
   5  -7   8    6.28   17.67
   6  -7   8   67.58   25.96
   7  -7   8   -2.18   18.14
   7  -7   8    8.81   17.68
   8  -7   8   37.45   26.77
   8  -7   8   30.38   22.51
   9  -7   8   49.80   30.16
   9  -7   8   43.46   32.76
  10  -7   8   16.32   23.89
 -10  -6   8   33.47   25.84
  10   6  -8   10.07   19.16
  -9  -6   8   13.00   22.72
   9   6  -8    7.12   17.35
  -8  -6   8  181.26   28.85
   8   6  -8  242.90   28.26
   7   6  -8    8.22   13.77
  -7  -6   8    3.81   14.53
  -6  -6   8  166.90   24.95
  -5  -6   8  -21.28   12.76
  -4  -6   8  425.31   38.85
  -2  -6   8 1354.94   95.32
  -1  -6   8  189.57   20.68
   0  -6   8  236.30   22.31
   1  -6   8    1.40    6.61
   2  -6   8  380.99   29.11
   2  -6   8  390.17   36.22
   3  -6   8  200.56   26.54
   4  -6   8   48.63   19.70
   5  -6   8    4.78   19.84
   6  -6   8   35.94   21.36
   7  -6   8  130.74   31.77
   8  -6   8    4.19   23.19
   8  -6   8   12.32   20.12
   9  -6   8   10.05   31.37
   9  -6   8   28.66   23.88
  10  -6   8   -2.34   26.44
  10   5  -8   14.44   20.33
 -10  -5   8    8.57   23.03
   9   5  -8   -8.49   17.00
  -9  -5   8    5.19   23.19
  -8  -5   8   37.72   20.69
   8   5  -8   34.52   16.67
   7   5  -8   -1.14   13.84
  -7  -5   8    8.18   14.65
  -6  -5   8   -0.35   14.87
  -5  -5   8  106.28   18.92
  -3  -5   8   44.46   14.97
  -2  -5   8  229.48   25.02
  -1  -5   8    0.64   10.65
   0  -5   8  566.77   42.42
   1  -5   8   -4.52    6.65
   1  -5   8    4.17   11.11
   2  -5   8  252.63   26.50
   2  -5   8  188.98   18.25
   3  -5   8   10.55   14.83
   4  -5   8  462.24   41.68
   5  -5   8   31.52   17.99
   6  -5   8  278.11   33.97
   7  -5   8   10.05   20.29
   8  -5   8  164.77   27.94
   8  -5   8  173.34   33.08
   9  -5   8   18.82   21.76
  10  -5   8   56.10   31.60
  11   4  -8  -21.84   19.34
 -10  -4   8   16.41   24.05
  10   4  -8   13.44   19.45
   9   4  -8   49.78   20.03
  -9  -4   8   61.59   26.68
  -8  -4   8   50.25   21.69
   8   4  -8   43.64   16.70
  -7  -4   8    0.03   16.21
   7   4  -8   -1.70   10.92
   6   4  -8   80.67   14.41
  -6  -4   8   93.45   19.77
  -5  -4   8   11.80   16.25
  -4  -4   8  475.07   41.87
  -2  -4   8  900.52   66.11
  -1  -4   8  492.82   39.00
   0  -4   8  417.86   32.91
   1  -4   8   29.87   12.86
   1  -4   8    5.47    8.47
   2  -4   8  114.10   21.98
   3  -4   8  567.39   46.86
   4  -4   8   18.05   14.88
   5  -4   8   57.32   19.32
   6  -4   8   14.49   17.37
   7  -4   8  151.49   25.50
   8  -4   8   14.36   22.99
   8  -4   8    6.07   23.64
   9  -4   8   52.86   24.27
  10  -4   8    9.14   27.69
  11   3  -8   12.43   21.72
  10   3  -8    5.98   15.56
 -10  -3   8    2.78   23.02
   9   3  -8  102.62   23.07
  -9  -3   8   66.80   24.87
   8   3  -8   11.31   12.87
  -8  -3   8    2.15   17.33
  -7  -3   8  142.46   24.32
   7   3  -8  165.93   19.65
  -6  -3   8  110.81   20.53
   6   3  -8   89.24   14.69
  -5  -3   8  207.75   25.26
  -4  -3   8   93.66   19.96
  -3  -3   8  917.48   67.92
  -2  -3   8  179.89   21.05
  -1  -3   8  807.76   58.46
   1  -3   8  436.66   36.99
   1  -3   8  513.34   35.62
   2  -3   8  102.80   17.26
   2  -3   8   49.12   13.12
   3  -3   8  267.57   28.12
   4  -3   8    2.05   11.97
   5  -3   8   27.06   18.11
   6  -3   8  213.81   27.85
   7  -3   8    9.00   17.35
   8  -3   8   10.86   21.59
   8  -3   8   10.21   19.54
   9  -3   8   23.07   25.61
  10  -3   8   19.95   27.52
  11  -3   8   39.97   34.06
  11   2  -8   24.04   21.32
  10   2  -8   -1.52   14.43
 -10  -2   8   17.76   25.74
  -9  -2   8   15.96   22.11
   9   2  -8   24.90   16.14
  -8  -2   8   77.21   25.21
   8   2  -8   62.37   16.53
  -7  -2   8    0.04   16.98
   7   2  -8   -2.72    9.54
   6   2  -8    7.31    9.48
  -6  -2   8   -7.78   14.18
  -5  -2   8  -20.73   16.38
  -4  -2   8   15.20   12.35
  -3  -2   8   -2.16   10.91
  -2  -2   8  898.08   65.43
  -1  -2   8    7.77    8.56
   0  -2   8   -9.09    6.45
   1  -2   8 2001.71  121.49
   1  -2   8 1916.13  131.06
   2  -2   8  382.03   31.46
   2  -2   8  397.73   34.06
   3  -2   8  602.77   47.02
   4  -2   8   57.02   18.50
   5  -2   8  614.86   49.69
   6  -2   8   17.25   15.81
   7  -2   8  235.57   30.03
   8  -2   8    4.77   21.46
   9  -2   8   33.71   23.79
  10  -2   8    1.35   24.92
  11  -2   8   24.29   31.71
  11   1  -8   11.10   20.45
  10   1  -8   45.16   20.77
  -9  -1   8   68.74   27.29
   9   1  -8   76.85   18.79
  -8  -1   8   18.60   21.94
   8   1  -8   27.00   12.49
   7   1  -8   90.94   15.47
  -7  -1   8   36.22   20.68
   6   1  -8   54.01   13.93
  -6  -1   8   30.53   18.85
   5   1  -8  649.85   45.40
  -5  -1   8  702.64   55.79
  -4  -1   8    7.41   14.33
  -3  -1   8  -13.01    9.30
  -2  -1   8  118.40   16.54
  -1  -1   8  433.68   34.83
   0  -1   8  388.07   31.53
   1  -1   8  248.89   24.07
   1  -1   8  254.41   24.04
   2  -1   8  330.54   27.97
   2  -1   8  318.59   29.24
   3  -1   8  192.19   23.09
   3  -1   8  234.99   19.61
   4  -1   8  452.86   39.29
   5  -1   8  383.62   36.09
   6  -1   8  493.70   43.78
   7  -1   8   15.65   18.76
   8  -1   8   56.83   22.47
   9  -1   8   11.77   25.27
  10  -1   8   63.47   27.88
  11  -1   8   16.04   29.51
  10   0  -8   37.10   18.76
  -9   0   8   18.13   23.24
   9   0  -8   12.19   14.69
  -8   0   8  115.19   30.75
   8   0  -8  130.07   18.71
  -7   0   8  -28.45   16.13
   7   0  -8   -1.69    9.79
   6   0  -8  241.52   21.16
  -6   0   8  214.31   28.01
  -5   0   8   -5.90   12.02
   5   0  -8   12.74    8.98
  -4   0   8  279.18   28.79
  -3   0   8   -9.58    9.50
  -2   0   8    8.46    9.06
  -1   0   8   -9.23    8.00
   0   0   8  920.62   72.88
   0   0   8 1121.29   66.28
   1   0   8   -4.14   10.74
   1   0   8    9.40    9.49
   2   0   8  292.05   25.08
   2   0   8  244.35   24.83
   3   0   8   -3.98    9.41
   3   0   8    3.99    8.32
   4   0   8   37.55    8.82
   4   0   8   30.25   15.67
   5   0   8   10.63   16.43
   6   0   8   48.90   19.65
   7   0   8    4.80   17.59
   8   0   8   20.82   19.97
   9   0   8   -5.45   18.77
  10   0   8   15.58   29.30
  11   0   8   10.84   26.56
  -9   1   8   60.14   29.94
   9  -1  -8   76.34   18.47
  -8   1   8    1.83   20.86
   8  -1  -8   36.49   13.00
   7  -1  -8   71.80   12.77
  -7   1   8   42.03   21.34
   7  -1  -8   80.36   36.30
   6  -1  -8   47.02   29.77
   6  -1  -8   58.98   13.00
  -6   1   8   15.88   17.88
   5  -1  -8  774.83   80.01
   5  -1  -8  762.79   47.88
  -5   1   8  639.49   57.88
  -4   1   8    5.41   13.22
  -3   1   8    2.08   10.02
  -2   1   8  135.72   18.89
  -1   1   8  442.75   37.96
   0   1   8  345.62   26.98
   0   1   8  338.67   32.06
   1   1   8  298.44   26.60
   1   1   8  309.93   28.64
   2   1   8  342.31   29.90
   2   1   8  360.67   30.42
   3   1   8  220.91   24.71
   3   1   8  253.13   23.35
   4   1   8  413.70   35.38
   4   1   8  528.09   41.55
   5   1   8  421.58   38.47
   6   1   8  497.38   44.58
   7   1   8    8.93   16.27
   8   1   8   37.10   21.81
   9   1   8   23.45   24.04
  10   1   8   26.49   24.92
  -9   2   8   37.96   34.81
   8  -2  -8   80.35   17.26
  -8   2   8   59.58   25.17
   8  -2  -8   80.03   40.30
   7  -2  -8   11.77    9.85
  -7   2   8  -13.32   16.21
   7  -2  -8   10.19   25.74
   6  -2  -8   17.64    9.78
  -6   2   8  -11.41   15.34
   6  -2  -8   22.17   24.04
   5  -2  -8   30.24    9.11
  -5   2   8  -10.28   16.45
   5  -2  -8   30.22   23.11
  -4   2   8   34.68   14.15
   4  -2  -8   51.74   26.32
  -3   2   8    2.96   11.49
  -2   2   8  882.03   68.11
  -1   2   8   -2.63   14.02
   0   2   8  -17.19   10.84
   0   2   8   -7.00    6.90
   1   2   8 2147.28  127.80
   1   2   8 2053.21  143.94
   2   2   8  523.12   43.42
   2   2   8  576.39   42.58
   3   2   8  963.99   70.71
   3   2   8  994.24   68.13
   4   2   8   20.38   13.50
   4   2   8   36.69   12.47
   5   2   8  759.72   58.38
   6   2   8   -2.37   16.11
   7   2   8  269.50   33.55
   8   2   8    4.51   16.11
   9   2   8   55.75   27.33
  10   2   8   15.27   26.41
   8  -3  -8   25.55   32.36
  -8   3   8   14.50   27.57
   7  -3  -8  177.65   37.61
   7  -3  -8  176.69   18.45
  -7   3   8  141.97   31.92
   6  -3  -8  113.65   28.47
  -6   3   8  105.23   26.19
   6  -3  -8  127.23   14.30
   5  -3  -8  341.91   44.51
   5  -3  -8  284.56   21.86
  -5   3   8  222.64   31.66
   4  -3  -8  133.37   30.73
  -4   3   8  117.74   22.18
   3  -3  -8  570.51   59.03
  -3   3   8  444.41   44.38
  -2   3   8  148.60   24.95
  -1   3   8  808.17   67.15
  -1   3   8  866.93   53.19
   0   3   8  186.89   18.44
   0   3   8  217.59   25.68
   1   3   8  628.81   44.01
   1   3   8  588.96   48.84
   2   3   8  132.30   18.50
   2   3   8  105.64   17.81
   3   3   8  379.75   34.73
   3   3   8  393.85   35.38
   4   3   8    5.67   14.14
   4   3   8    1.34   10.87
   5   3   8    9.59   17.07
   5   3   8   10.04   11.12
   6   3   8  294.81   35.20
   7   3   8   14.75   18.75
   8   3   8  -15.90   22.14
   9   3   8   -9.74   22.64
  10   3   8   32.09   32.15
   9  -4  -8   74.66   40.74
  -8   4   8   53.35   33.86
   8  -4  -8   85.30   36.44
   7  -4  -8   15.70   25.78
  -7   4   8    0.09   22.18
   6  -4  -8  130.73   35.47
   6  -4  -8  104.11   12.65
  -6   4   8   56.70   24.43
   5  -4  -8   44.25   22.51
  -5   4   8   11.38   20.40
   4  -4  -8  491.81   57.32
  -3   4   8  -24.83   17.15
   3  -4  -8   -4.33   18.48
   2  -4  -8  602.20   69.84
  -2   4   8  798.16   63.02
  -1   4   8  418.55   32.54
  -1   4   8  539.02   47.47
   0   4   8  512.34   44.55
   0   4   8  448.26   34.72
   1   4   8   56.37   16.86
   1   4   8   47.54   14.39
   2   4   8  105.84   17.84
   2   4   8   86.48   16.43
   3   4   8  688.49   56.15
   3   4   8  748.81   55.23
   4   4   8   28.19   15.48
   4   4   8   30.82   15.43
   5   4   8   62.08   16.77
   5   4   8   37.03   19.34
   6   4   8    0.67   17.53
   7   4   8  192.02   30.60
   8   4   8    7.29   21.64
   9   4   8   76.99   31.23
  10   4   8   13.98   32.60
   9  -5  -8   23.24   32.34
   8  -5  -8   81.42   35.63
  -8   5   8   50.80   37.60
  -7   5   8  -12.24   22.70
   7  -5  -8   20.25   27.34
  -6   5   8  -21.21   20.29
   6  -5  -8    7.33   19.09
  -5   5   8   74.84   26.40
   5  -5  -8  119.27   29.51
   4  -5  -8    3.15   15.79
  -4   5   8  -16.13   16.12
   3  -5  -8   84.16   26.87
  -3   5   8   61.21   25.76
   2  -5  -8  201.63   33.14
  -2   5   8  156.16   27.56
  -1   5   8    4.79    7.42
  -1   5   8   -6.34   16.38
   0   5   8  584.11   50.40
   0   5   8  582.64   41.44
   1   5   8   -2.89   10.02
   1   5   8   -3.94    9.49
   2   5   8  461.38   37.70
   2   5   8  390.78   38.03
   3   5   8   15.17   13.96
   3   5   8   -3.81   12.32
   4   5   8  698.78   55.62
   4   5   8  654.91   54.05
   5   5   8   26.23   17.13
   5   5   8   45.72   20.87
   6   5   8  365.29   40.28
   7   5   8   -3.74   20.97
   8   5   8  221.62   36.94
   9   5   8  -12.13   24.50
  10   5   8   49.84   36.96
   9  -6  -8   88.10   40.42
  -8   6   8  203.19   52.02
   8  -6  -8  240.09   44.21
  -7   6   8  -43.61   28.41
   7  -6  -8   11.99   25.80
   6  -6  -8  150.54   32.93
  -6   6   8   80.69   34.80
  -5   6   8  -26.10   18.53
   5  -6  -8   14.16   20.25
   3  -6  -8    6.07   15.14
   2  -6  -8 1038.29  103.06
  -2   6   8 1203.19   93.51
  -1   6   8  191.53   29.37
  -1   6   8  125.44   15.13
   1  -6  -8  155.77   28.87
   0   6   8  219.78   21.34
   0   6   8  205.54   26.02
   1   6   8   -0.87    9.70
   1   6   8   -0.49    9.20
   2   6   8  637.06   55.59
   2   6   8  759.04   53.62
   3   6   8  391.57   36.82
   3   6   8  334.27   36.17
   4   6   8   63.30   21.56
   4   6   8   77.66   22.79
   5   6   8   11.27   21.26
   5   6   8   -3.90   17.93
   6   6   8   49.66   20.98
   6   6   8   52.83   24.84
   7   6   8  137.65   37.56
   8   6   8   -2.66   24.40
   9   6   8   10.20   26.56
  10   6   8    0.36   35.35
  10  -7  -8   33.56   38.11
   9  -7  -8   82.35   40.02
   8  -7  -8   87.56   36.79
   7  -7  -8  301.85   45.17
  -7   7   8  161.46   42.55
   6  -7  -8   38.69   26.77
  -6   7   8    5.07   26.06
  -5   7   8   29.84   28.18
   5  -7  -8   89.69   27.84
  -4   7   8  -22.93   22.21
   4  -7  -8   -2.63   15.85
  -3   7   8  390.83   48.24
   3  -7  -8  349.36   44.84
   2  -7  -8    5.46   18.73
  -2   7   8   -3.77   23.30
   1  -7  -8   30.95   20.58
  -1   7   8    8.38    8.24
  -1   7   8    6.22   20.55
   0   7   8  264.79   31.73
   1   7   8  106.13   19.73
   1   7   8  107.67   16.72
   2   7   8  100.11   22.56
   2   7   8   63.08   20.16
   3   7   8  237.55   29.99
   3   7   8  255.83   29.74
   4   7   8   54.48   24.04
   4   7   8   57.47   22.40
   5   7   8    4.84   20.12
   5   7   8   14.88   23.11
   6   7   8   68.23   25.06
   6   7   8   55.85   30.53
   7   7   8  -36.77   23.83
   8   7   8   21.17   32.53
   9   7   8   45.08   37.86
  10   7   8  -19.58   33.96
  10  -8  -8   44.65   41.53
   9  -8  -8   93.11   40.40
   8  -8  -8  157.77   45.07
   7  -8  -8   56.68   31.43
  -7   8   8  -14.35   29.48
  -6   8   8    1.37   27.22
   5  -8  -8    7.50   20.98
  -5   8   8  -33.92   28.09
  -4   8   8   37.00   29.88
   3  -8  -8   13.17   18.28
  -3   8   8   -8.96   24.70
  -2   8   8  181.57   39.13
   2  -8  -8  153.41   31.23
  -1   8   8  177.68   29.87
   1  -8  -8  119.22   26.25
   0   8   8   13.89   10.31
   0   8   8   30.74   18.81
   0  -8  -8   21.51   19.26
   1   8   8   51.84   19.96
   1   8   8   40.94   14.51
   2   8   8  446.25   38.42
   2   8   8  447.87   42.22
   3   8   8  364.98   36.31
   3   8   8  360.67   38.67
   4   8   8   13.09   21.78
   4   8   8    9.19   22.13
   5   8   8  309.66   38.30
   5   8   8  335.51   40.33
   6   8   8   40.92   25.65
   6   8   8   24.14   26.40
   7   8   8  202.76   36.79
   8   8   8   17.69   35.77
   9   8   8   87.91   38.09
  10   8   8  -17.40   33.28
  10  -9  -8   50.27   41.60
   9  -9  -8  113.28   44.12
   8  -9  -8   65.50   37.93
  -7   9   8   -1.81   32.56
   7  -9  -8   48.15   32.49
  -6   9   8   24.57   37.41
   6  -9  -8   38.43   29.54
   5  -9  -8  158.78   38.26
  -5   9   8   78.02   36.10
   4  -9  -8  -14.58   18.86
  -4   9   8  -17.91   25.50
   3  -9  -8   97.71   28.34
  -3   9   8  100.36   37.16
   2  -9  -8  197.06   35.35
  -2   9   8  231.71   37.70
  -1   9   8  245.13   34.57
   1  -9  -8  217.79   35.67
   0   9   8    1.14   17.38
   0  -9  -8   -3.16   18.69
   1   9   8  102.96   17.65
   1   9   8  154.59   24.14
   2   9   8  122.75   23.90
   2   9   8  105.59   22.93
   3   9   8  154.93   28.46
   3   9   8  122.68   25.74
   4   9   8  467.02   48.36
   4   9   8  431.98   43.95
   5   9   8  162.25   36.72
   5   9   8  162.45   31.72
   6   9   8  109.15   34.13
   6   9   8   99.22   30.86
   7   9   8  -16.14   25.76
   8   9   8  189.57   46.30
   9   9   8  -20.24   35.72
  10   9   8  -45.54   30.44
   9 -10  -8   83.32   42.71
   8 -10  -8  185.47   49.87
   7 -10  -8   31.00   31.92
   6 -10  -8  146.34   38.52
  -6  10   8   67.24   37.68
  -5  10   8  -21.29   36.39
   5 -10  -8    3.40   21.08
   4 -10  -8  174.37   36.94
  -4  10   8  235.71   46.04
   3 -10  -8   12.53   20.13
  -3  10   8    5.05   28.46
   2 -10  -8  137.49   31.39
  -2  10   8  160.17   36.13
  -1  10   8   32.49   24.94
   1 -10  -8   15.58   22.57
   0 -10  -8  405.26   49.15
   0  10   8  434.02   43.61
   1  10   8   44.28   18.31
   2  10   8  428.84   42.11
   2  10   8  333.51   34.58
   3  10   8  111.44   26.20
   3  10   8  154.62   27.89
   4  10   8  161.87   33.18
   4  10   8  161.07   30.58
   5  10   8   -6.00   23.47
   5  10   8   33.30   27.49
   6  10   8   20.57   28.73
   6  10   8   -3.02   27.87
   7  10   8  -13.74   26.43
   7  10   8    2.48   29.35
   8  10   8   -8.72   31.23
   9  10   8   -3.12   34.25
   9 -11  -8   54.15   40.23
   8 -11  -8   45.78   37.75
   7 -11  -8   62.27   36.09
   6 -11  -8    4.81   29.90
  -6  11   8   30.24   35.74
  -4  11   8   40.14   36.63
   4 -11  -8   46.20   26.92
   3 -11  -8   94.90   32.73
  -3  11   8   61.17   36.26
   2 -11  -8    4.41   19.13
  -2  11   8   18.44   27.42
  -1  11   8   89.36   30.28
   0  11   8  150.80   28.09
   0 -11  -8  121.09   28.71
   1  11   8  137.44   26.91
   2  11   8  191.44   30.36
   3  11   8   27.74   23.71
   4  11   8   77.37   29.90
   4  11   8   70.49   25.76
   5  11   8    2.75   28.64
   5  11   8  -14.72   22.99
   6  11   8  212.18   38.09
   6  11   8  201.34   43.66
   7  11   8  -23.30   27.56
   7  11   8  -31.75   31.24
   8  11   8   71.18   39.65
   9  11   8  -60.25   31.17
   9 -12  -8   50.44   43.82
   8 -12  -8   42.50   36.13
   7 -12  -8   65.88   35.52
  -6  12   8   82.95   48.40
   6 -12  -8  136.49   42.17
   5 -12  -8    4.45   24.93
  -5  12   8   16.79   36.77
  -4  12   8   34.12   44.22
   4 -12  -8   80.51   33.34
  -3  12   8   -2.13   33.23
   3 -12  -8   14.34   22.82
  -2  12   8  -18.27   20.96
   2 -12  -8   23.25   27.60
   1 -12  -8    0.56   22.66
  -1  12   8    6.16   20.23
   0 -12  -8  112.05   28.52
   0  12   8   81.95   29.32
   1  12   8  517.77   52.53
   2  12   8   40.29   24.64
   3  12   8   77.87   31.12
   4  12   8   27.44   24.62
   5  12   8  168.86   36.37
   5  12   8  180.85   38.66
   6  12   8  -32.19   19.77
   6  12   8  -23.36   30.08
   7  12   8  113.15   40.49
   7  12   8   56.06   37.88
   8  12   8  -42.27   28.16
   9  12   8   15.69   44.56
   8 -13  -8   64.44   39.83
   7 -13  -8  169.94   51.57
   6 -13  -8  154.68   39.18
  -6  13   8   21.90   42.93
   5 -13  -8  321.38   48.99
  -5  13   8  313.72   56.28
   4 -13  -8   65.73   35.44
  -4  13   8   24.20   38.25
   3 -13  -8  147.53   39.01
  -3  13   8  153.38   49.17
   2 -13  -8   44.00   30.42
  -2  13   8   12.70   31.52
  -1  13   8  565.92   59.85
   1 -13  -8  502.10   62.11
   0 -13  -8   33.39   25.34
   0  13   8   25.68   28.06
   1  13   8  184.34   30.82
   2  13   8   38.88   25.38
   3  13   8   19.11   26.71
   4  13   8  -15.76   27.56
   5  13   8   69.34   36.53
   6  13   8   13.70   37.50
   7  13   8  -45.88   32.23
   7  13   8  -56.12   28.29
   8  13   8  -61.89   31.34
   8 -14  -8   33.43   39.91
   7 -14  -8   61.30   39.41
   6 -14  -8  152.94   49.14
  -5  14   8   -9.67   39.85
   5 -14  -8   51.99   36.97
   4 -14  -8  107.56   40.95
  -4  14   8   69.74   48.57
   3 -14  -8    7.53   25.44
  -3  14   8  -18.82   35.06
   2 -14  -8  101.55   35.69
  -2  14   8   12.58   34.41
   1 -14  -8   69.93   32.79
  -1  14   8   75.97   37.30
   0  14   8  243.98   39.28
   0 -14  -8  219.96   38.51
   1  14   8   46.87   29.50
   2  14   8    9.55   24.76
   3  14   8   40.41   31.28
   4  14   8  -10.57   29.30
   5  14   8   75.23   38.88
   6  14   8   13.21   37.93
   7  14   8  -11.02   38.40
   7 -15  -8   68.87   46.20
   6 -15  -8   55.91   44.50
  -5  15   8   13.41   42.62
   4 -15  -8   32.73   32.95
  -4  15   8   10.77   39.56
   3 -15  -8  131.31   42.86
  -3  15   8   23.14   38.84
  -2  15   8    3.78   35.27
   2 -15  -8   24.94   31.87
   0  15   8   41.48   31.28
   1  15   8    3.73   26.92
   2  15   8  151.73   39.54
   3  15   8  -15.45   22.95
   4  15   8  135.95   42.72
   5  15   8   -1.59   35.16
   6  15   8  106.51   46.14
   7  15   8  -46.80   43.42
   7 -16  -8   87.47   53.39
   6 -16  -8   92.14   46.06
  -5  16   8  -28.20   43.19
   5 -16  -8   60.46   43.83
   4 -16  -8  176.43   44.24
  -4  16   8   94.25   50.85
  -3  16   8   16.97   41.19
   3 -16  -8   43.61   38.14
  -2  16   8   50.97   43.48
   2 -16  -8  114.12   40.52
   1 -16  -8   10.76   27.12
  -1  16   8   13.06   34.34
   0  16   8   10.63   31.56
   1  16   8   59.05   33.49
   2  16   8  113.18   39.40
   3  16   8   15.76   31.36
   4  16   8  -16.38   30.64
   5  16   8   28.11   38.85
   6  16   8  -33.63   37.69
   7  16   8   -9.88   45.72
   6 -17  -8   76.57   53.56
   5 -17  -8  103.24   52.55
  -4  17   8    6.37   51.15
   4 -17  -8   45.99   36.73
   3 -17  -8  187.42   43.59
  -3  17   8  105.33   54.34
  -2  17   8   36.79   41.72
   2 -17  -8   47.05   35.69
  -1  17   8   21.78   32.98
   0  17   8  -12.47   30.81
   1  17   8   57.66   33.82
   2  17   8  -21.98   31.58
   3  17   8   64.85   39.67
   4  17   8    0.52   37.58
   5  17   8  -52.97   38.01
   6  17   8  -26.74   41.37
   5 -18  -8   44.51   44.78
  -4  18   8  -11.78   50.56
   3 -18  -8   71.54   42.91
  -3  18   8  -39.31   44.81
  -2  18   8   27.52   44.57
  -1  18   8   12.33   40.19
   0  18   8  -13.67   34.13
   1  18   8  -52.25   32.26
   2  18   8   -6.37   36.33
   3  18   8   80.51   41.41
   4  18   8  -41.30   36.42
   5  18   8   30.35   44.77
   4 -19  -8   72.07   48.52
  -4  19   8  -40.25   48.62
  -3  19   8   -4.33   49.10
  -2  19   8   -3.58   45.80
  -1  19   8   18.49   43.20
   0  19   8  -46.31   37.36
   1  19   8  -26.29   37.45
   2  19   8  -27.91   37.14
   3  19   8  -48.03   35.86
   4  19   8   27.31   41.80
  -3  20   8  -13.66   52.45
  -2  20   8   66.03   57.35
  -1  20   8  -33.04   42.61
   0  20   8  -25.61   40.75
   1  20   8  -49.33   40.67
   2  20   8   34.31   44.28
  -1  21   8  -46.52   46.27
  -4 -19   9  -12.17   11.23
  -3 -19   9    5.83   12.58
   2 -19   9   28.39   20.84
   3 -19   9  -16.69   20.03
   4 -19   9   29.97   29.28
  -5 -18   9   -6.31   11.28
  -4 -18   9   -3.45   12.54
  -3 -18   9   -6.72   11.93
   1  18  -9    6.57   24.29
   2 -18   9   14.74   19.85
   3 -18   9   -7.31   20.51
   4 -18   9    6.35   22.36
   5 -18   9  -12.52   28.67
  -6 -17   9    2.08   14.77
  -5 -17   9  -16.65   10.65
  -4 -17   9   -6.71   12.81
  -3 -17   9   14.14   13.90
   1  17  -9   17.62   23.43
   1 -17   9  -11.60   12.75
   2 -17   9   54.17   23.65
   3 -17   9    0.78   21.83
   4 -17   9   76.92   32.68
   5 -17   9    3.39   28.92
  -6 -16   9    1.90   14.99
  -5 -16   9    9.71   14.60
  -4 -16   9    3.15   12.83
  -3 -16   9   31.55   14.82
   1  16  -9   77.96   28.09
   3 -16   9  101.89   29.54
   4 -16   9  -11.24   23.27
   5 -16   9   26.45   27.42
   6 -16   9  -22.44   28.24
  -7 -15   9   16.58   18.37
  -6 -15   9   -1.77   15.41
  -5 -15   9   97.49   19.32
  -4 -15   9   10.06   13.74
  -3 -15   9   45.96   15.55
  -2 -15   9    4.29   12.42
   0  15  -9  -10.39   19.78
   4 -15   9   13.56   20.97
   5 -15   9   -6.59   24.95
   6 -15   9  -16.48   23.40
   7 -15   9  -29.96   29.88
  -7 -14   9   -0.46   16.62
  -6 -14   9   16.07   15.65
  -5 -14   9    6.53   15.25
  -4 -14   9   43.25   15.47
  -3 -14   9  100.03   18.78
  -2 -14   9    5.44   12.66
   0  14  -9   -8.06   18.37
   1 -14   9  187.07   39.80
   2 -14   9   -8.00   19.33
   5 -14   9   85.17   32.67
   6 -14   9  -15.46   22.03
   7 -14   9    6.08   30.71
  -8 -13   9    5.28   20.37
  -7 -13   9   -5.02   18.40
  -6 -13   9    8.28   15.66
  -5 -13   9   69.18   20.93
  -4 -13   9   88.50   18.79
  -3 -13   9  -11.30   12.70
  -2 -13   9   30.03   15.15
  -1 -13   9   -1.32   11.10
   1 -13   9  -14.98   21.80
   2 -13   9  199.03   29.52
   3 -13   9    6.22   19.69
   6 -13   9  100.05   31.95
   7 -13   9   -2.40   27.30
   8 -13   9  -12.25   30.47
  -9 -12   9   26.00   26.79
  -8 -12   9   16.72   23.68
  -7 -12   9    2.36   16.97
  -6 -12   9   94.74   23.35
  -5 -12   9   19.01   18.01
  -4 -12   9  177.13   24.66
  -3 -12   9    8.71   14.82
  -2 -12   9    5.02   12.64
  -1 -12   9   10.45   12.88
   0 -12   9  116.49   17.90
   1 -12   9  148.24   31.02
   2 -12   9   11.91   19.61
   3 -12   9   10.81   19.80
   4 -12   9    6.65   19.70
   5 -12   9   89.48   27.58
   6 -12   9    3.54   21.12
   7 -12   9   -9.79   25.59
   8 -12   9    5.55   29.97
  -9 -11   9  120.20   34.90
  -8 -11   9   12.75   23.73
  -7 -11   9   62.62   25.85
  -6 -11   9  -13.68   16.98
  -5 -11   9  207.08   27.77
  -4 -11   9   42.40   19.33
  -3 -11   9   32.18   15.97
  -2 -11   9   92.19   19.44
  -1 -11   9  186.80   21.95
   0 -11   9   81.79   18.06
   1 -11   9  165.99   26.54
   2 -11   9   27.55   22.31
   3 -11   9  -21.00   16.54
   4 -11   9   72.00   26.54
   5 -11   9    0.09   19.07
   6 -11   9   34.38   25.39
   7 -11   9    4.04   25.45
   8 -11   9   -1.27   26.83
   9 -11   9  -16.74   29.42
  -9 -10   9   13.46   24.27
  -8 -10   9   10.08   22.68
  -7 -10   9   20.30   21.80
  -6 -10   9    6.61   16.03
  -5 -10   9  123.74   26.97
  -4 -10   9  -18.04   10.83
  -3 -10   9  109.90   19.31
  -2 -10   9   35.31   14.73
  -1 -10   9  185.62   21.55
   0 -10   9   74.13   17.43
   1 -10   9  267.66   31.95
   1 -10   9  299.76   27.07
   2 -10   9   49.70   21.78
   3 -10   9  232.12   30.25
   4 -10   9   27.72   22.68
   5 -10   9  321.59   38.55
   6 -10   9   18.03   24.42
   7 -10   9   84.10   29.26
   7 -10   9  109.76   30.36
   8 -10   9   13.49   27.84
   9 -10   9   33.26   33.73
  -9  -9   9   10.24   24.05
  -8  -9   9   29.87   24.87
  -7  -9   9   90.33   26.68
  -6  -9   9   -2.38   18.08
  -5  -9   9   12.87   18.35
  -4  -9   9   31.69   15.56
  -3  -9   9   67.66   16.99
  -2  -9   9   46.55   15.99
  -1  -9   9    9.74   12.07
   0  -9   9   59.04   16.35
   1  -9   9  -12.85    9.98
   1  -9   9   -7.74   14.05
   2  -9   9  117.46   26.65
   3  -9   9  -18.75   17.26
   4  -9   9   73.96   24.48
   5  -9   9  189.69   38.44
   6  -9   9  169.23   34.89
   7  -9   9   17.83   25.04
   7  -9   9   31.49   26.79
   8  -9   9   11.64   27.12
   8  -9   9   39.00   27.43
   9  -9   9   21.97   31.26
 -10  -8   9   50.68   29.08
  -9  -8   9   24.79   24.71
  -8  -8   9  163.01   28.99
  -7  -8   9    4.82   19.15
  -6  -8   9  173.04   25.62
  -5  -8   9   24.41   19.21
  -4  -8   9  192.39   25.25
  -3  -8   9   73.60   19.51
  -2  -8   9  402.08   35.90
  -1  -8   9  121.66   17.97
   0  -8   9   76.87   13.56
   1  -8   9   44.22   12.74
   1  -8   9   33.58   15.90
   2  -8   9   41.19   20.30
   3  -8   9  208.77   30.27
   4  -8   9   -6.53   16.83
   5  -8   9   24.89   24.58
   6  -8   9   35.25   25.10
   7  -8   9   32.43   26.67
   8  -8   9   31.47   27.26
   8  -8   9   20.61   25.43
   9  -8   9   44.82   33.15
   9  -8   9   57.22   31.44
  10  -8   9   33.03   31.66
 -10  -7   9   17.12   25.70
  -9  -7   9    6.50   22.28
  -8  -7   9   23.78   21.83
  -7  -7   9   53.44   21.54
  -6  -7   9  139.40   25.03
  -5  -7   9  143.00   22.17
  -3  -7   9   55.61   17.48
  -2  -7   9  228.32   26.03
   0  -7   9  437.35   36.09
   1  -7   9   -6.23    8.44
   1  -7   9   -7.75   12.38
   2  -7   9  205.84   27.49
   3  -7   9   24.33   19.13
   4  -7   9  684.36   57.47
   5  -7   9   15.13   22.18
   6  -7   9  142.99   26.79
   7  -7   9   24.73   26.18
   8  -7   9   93.31   29.21
   8  -7   9   83.81   29.56
   9  -7   9   59.18   32.48
   9  -7   9   34.09   31.85
  10  -7   9   15.90   30.38
 -10  -6   9   19.90   25.04
  -9  -6   9  -10.83   22.21
  -8  -6   9   76.44   25.72
  -7  -6   9   25.31   20.77
  -6  -6   9    3.46   14.96
  -5  -6   9    6.04   14.00
  -4  -6   9    3.02   14.70
  -3  -6   9   32.85   14.38
  -2  -6   9  169.02   22.80
  -1  -6   9  943.23   68.77
   0  -6   9   -8.95   10.00
   1  -6   9   63.85   11.60
   1  -6   9   60.23   16.76
   2  -6   9  169.08   23.31
   2  -6   9  137.66   15.15
   3  -6   9  236.12   29.53
   4  -6   9   40.44   19.47
   5  -6   9  225.43   31.30
   6  -6   9   25.64   20.62
   7  -6   9  163.97   30.22
   8  -6   9   20.57   22.59
   8  -6   9   22.37   22.11
   9  -6   9   41.04   30.72
   9  -6   9   47.78   30.76
  10  -6   9   20.26   25.48
 -10  -5   9   15.20   27.03
  10   5  -9  -31.13   17.22
   9   5  -9   52.64   21.86
  -9  -5   9   24.00   23.30
  -8  -5   9    7.02   18.04
  -7  -5   9  127.37   23.72
  -6  -5   9  107.25   20.24
  -5  -5   9  -12.42   13.79
  -4  -5   9   -2.65   15.47
  -3  -5   9  593.96   47.98
  -2  -5   9  136.65   20.72
  -1  -5   9  203.58   22.26
   0  -5   9   -8.45    7.55
   1  -5   9    3.17    7.29
   1  -5   9   -7.25   10.24
   2  -5   9   91.66   23.41
   3  -5   9   -0.70   13.38
   4  -5   9   47.04   21.58
   5  -5   9   90.47   27.41
   6  -5   9   15.30   21.50
   7  -5   9    1.69   19.27
   8  -5   9   36.99   25.79
   8  -5   9   33.77   25.79
   9  -5   9   34.90   30.23
  10  -5   9    9.54   24.84
  11   4  -9  -17.92   16.13
  10   4  -9    4.24   19.68
 -10  -4   9   41.95   25.80
  -9  -4   9    2.39   21.29
   9   4  -9   -3.16   16.04
   8   4  -9  137.32   21.39
  -8  -4   9   96.15   26.21
  -7  -4   9   -9.75   16.38
  -6  -4   9  124.40   22.30
  -5  -4   9   -1.62   15.20
  -4  -4   9   98.65   20.67
  -3  -4   9  427.94   38.40
  -2  -4   9  781.40   58.93
  -1  -4   9  593.24   45.75
   0  -4   9  -15.13    9.21
   1  -4   9  847.91   61.74
   1  -4   9  925.67   62.14
   2  -4   9  190.54   25.04
   2  -4   9  143.56   16.86
   3  -4   9  299.94   32.01
   4  -4   9    6.73   16.26
   5  -4   9   77.82   24.86
   6  -4   9   40.98   20.68
   7  -4   9  152.56   30.77
   8  -4   9   18.06   24.19
   8  -4   9   12.51   21.81
   9  -4   9   54.43   29.95
  10  -4   9  -13.54   23.58
  11   3  -9    9.94   21.63
 -10  -3   9   21.79   25.75
  10   3  -9   -2.82   15.26
  -9  -3   9   63.87   25.12
   9   3  -9   83.26   20.68
  -8  -3   9   11.41   19.91
   8   3  -9   16.98   15.21
  -7  -3   9  -16.97   15.10
   7   3  -9   -0.08   11.97
  -6  -3   9   39.82   19.34
  -5  -3   9  420.56   40.14
  -4  -3   9  223.29   28.01
  -3  -3   9  -10.32   12.63
  -2  -3   9  839.63   63.05
  -1  -3   9   89.76   16.88
   0  -3   9 1464.04  100.08
   1  -3   9   61.98   12.72
   1  -3   9   67.82   17.15
   2  -3   9  601.86   48.18
   3  -3   9   10.58   13.25
   4  -3   9  280.48   31.11
   5  -3   9  191.89   27.97
   6  -3   9  175.51   26.78
   7  -3   9   71.15   25.00
   8  -3   9   94.78   28.20
   9  -3   9   33.11   26.47
  10  -3   9   26.91   26.31
  11   2  -9  -25.06   16.95
  10   2  -9   78.61   21.14
 -10  -2   9  106.88   35.46
   9   2  -9   24.73   14.46
  -9  -2   9   38.31   23.31
  -8  -2   9  117.57   24.72
   8   2  -9  146.86   20.32
  -7  -2   9  -13.30   17.20
   7   2  -9   -5.14   10.03
  -6  -2   9  166.72   24.89
  -5  -2   9   12.94   18.66
  -4  -2   9  280.24   29.76
  -1  -2   9  170.13   19.66
   0  -2   9   27.59   12.04
   1  -2   9    8.20   10.92
   1  -2   9   23.69   12.97
   2  -2   9  -12.27   11.93
   2  -2   9    9.67   13.27
   3  -2   9   46.72   16.74
   3  -2   9   51.82   10.28
   4  -2   9   10.77   15.58
   5  -2   9   43.09   19.11
   6  -2   9   89.80   24.14
   7  -2   9   17.11   19.49
   8  -2   9   67.19   25.88
   9  -2   9   11.53   20.66
  10  -2   9   29.63   25.38
  11   1  -9   18.33   22.00
  10   1  -9  -11.82   15.88
 -10  -1   9   29.48   27.88
   9   1  -9  115.52   19.81
  -9  -1   9   84.55   28.84
   8   1  -9    3.99   10.93
  -8  -1   9   10.34   19.95
   7   1  -9  157.00   19.47
  -7  -1   9  125.28   28.52
  -6  -1   9  -16.28   15.42
  -5  -1   9  244.78   28.28
  -4  -1   9  167.43   23.64
  -3  -1   9   95.46   18.26
  -2  -1   9  105.77   16.83
  -1  -1   9  640.54   49.11
   0  -1   9  245.75   22.92
   0  -1   9  259.10   24.65
   1  -1   9   35.84   14.24
   1  -1   9   47.36   14.43
   2  -1   9  430.33   37.21
   2  -1   9  461.97   36.88
   3  -1   9   70.42   12.63
   3  -1   9   69.49   18.57
   4  -1   9  123.79   24.67
   5  -1   9   13.18   17.53
   6  -1   9  344.08   37.09
   7  -1   9   85.33   25.82
   8  -1   9   -1.26   22.35
   9  -1   9    0.19   24.55
  10  -1   9   29.01   29.46
  10   0  -9   -9.84   12.28
   9   0  -9   11.37   11.95
  -9   0   9   -1.43   23.62
   8   0  -9    4.10   12.31
  -8   0   9  -13.24   19.63
  -7   0   9   -9.46   17.17
   7   0  -9   13.95   10.51
  -6   0   9  -21.15   13.65
  -5   0   9   52.67   18.13
  -3   0   9  654.46   52.31
  -1   0   9   17.57   12.84
   0   0   9  -16.47    9.33
   0   0   9   -3.61    7.47
   1   0   9 1961.77  134.36
   1   0   9 1940.22  120.99
   2   0   9   10.05   10.82
   2   0   9    4.94   12.70
   3   0   9  786.22   54.21
   3   0   9  681.10   54.47
   4   0   9   -6.15   11.02
   5   0   9  284.89   31.13
   6   0   9   15.41   17.63
   7   0   9  185.57   28.14
   8   0   9    2.44   17.14
   9   0   9   12.19   20.20
  10   0   9    7.08   24.31
   9  -1  -9  111.76   19.02
  -9   1   9   91.64   33.07
  -8   1   9    7.40   21.02
   8  -1  -9   19.64   13.15
   7  -1  -9  172.73   19.09
  -7   1   9  135.41   30.17
  -6   1   9    3.34   15.09
  -5   1   9  331.34   35.22
  -4   1   9  208.41   25.97
  -3   1   9   72.98   15.37
  -2   1   9  117.96   18.66
  -1   1   9  443.20   38.65
   0   1   9  233.98   21.88
   0   1   9  214.49   25.30
   1   1   9   37.36   13.21
   1   1   9   21.50   17.33
   2   1   9  543.34   41.51
   2   1   9  444.29   38.40
   3   1   9   59.64   15.54
   3   1   9   65.63   19.46
   4   1   9   69.55   13.36
   4   1   9  101.16   21.79
   5   1   9   -3.89   12.43
   6   1   9  332.34   35.68
   7   1   9   68.96   24.39
   8   1   9    5.67   17.41
   9   1   9    4.69   21.19
  10   1   9    5.59   28.43
  -9   2   9   27.93   30.77
   8  -2  -9  144.73   19.47
  -8   2   9  134.39   33.82
   8  -2  -9  220.94   52.85
   7  -2  -9  -16.25   23.95
   7  -2  -9   -6.99    8.55
  -7   2   9    0.04   19.07
   6  -2  -9  196.96   40.24
  -6   2   9  142.55   25.38
   5  -2  -9   38.72   28.75
  -5   2   9    9.31   19.21
  -4   2   9  340.76   35.70
  -2   2   9   14.64   15.63
  -1   2   9  165.14   24.23
   0   2   9   40.81   12.78
   0   2   9   25.25   16.56
   1   2   9   17.14    9.95
   1   2   9   18.86   14.94
   2   2   9   19.50   13.47
   2   2   9    9.97   10.52
   3   2   9   49.95   15.59
   3   2   9   41.32   15.97
   4   2   9   10.50   14.57
   4   2   9   10.38   11.20
   5   2   9   38.98   21.18
   6   2   9  120.04   29.12
   7   2   9   -2.49   18.79
   8   2   9  114.92   32.71
   9   2   9    4.53   23.34
  10   2   9   23.43   25.46
  -9   3   9  110.25   44.28
   8  -3  -9   26.52   32.30
  -8   3   9   42.32   30.69
   7  -3  -9   12.75    9.65
  -7   3   9  -13.67   18.82
   7  -3  -9   11.34   25.83
   6  -3  -9   75.66   31.59
  -6   3   9   33.69   21.84
   5  -3  -9  391.04   49.12
  -5   3   9  284.64   36.71
   4  -3  -9  238.64   39.64
  -4   3   9  225.56   31.03
  -3   3   9    3.89   14.20
  -2   3   9  503.31   46.21
  -1   3   9   99.97   24.51
  -1   3   9   87.38   11.96
   0   3   9 1553.05  100.57
   0   3   9 1725.59  119.00
   1   3   9   84.46   17.10
   1   3   9   95.07   19.93
   2   3   9  901.80   62.90
   2   3   9  881.56   67.19
   3   3   9   -1.99   11.35
   3   3   9  -10.64   12.99
   4   3   9  357.84   34.36
   4   3   9  329.91   31.45
   5   3   9  183.05   26.06
   6   3   9  150.64   25.84
   7   3   9   58.89   24.33
   8   3   9  101.80   30.83
   9   3   9   19.20   25.41
  10   3   9   37.22   29.21
   9  -4  -9   20.72   35.42
  -8   4   9  106.01   36.75
   8  -4  -9  160.50   44.90
   7  -4  -9   13.69   26.38
  -7   4   9   -7.60   21.65
   6  -4  -9  157.69   34.92
  -6   4   9   97.95   30.17
  -5   4   9   -8.58   20.18
   5  -4  -9   21.28   21.37
   4  -4  -9  128.96   32.41
  -4   4   9   51.63   26.83
   3  -4  -9  360.78   45.16
  -3   4   9  225.17   32.79
  -2   4   9  872.82   73.56
  -1   4   9  606.52   52.16
  -1   4   9  479.73   37.18
   0   4   9    4.54    8.99
   0   4   9   -0.97   13.14
   1   4   9 1136.61   75.46
   1   4   9 1153.71   85.22
   2   4   9  308.07   29.18
   2   4   9  238.18   27.60
   3   4   9  455.51   40.23
   3   4   9  417.67   39.01
   4   4   9   -6.48   12.97
   4   4   9    2.66   13.58
   5   4   9   96.08   27.10
   5   4   9   91.65   20.69
   6   4   9   48.20   25.28
   7   4   9  191.06   36.78
   8   4   9   -2.18   20.72
   9   4   9   37.09   27.28
  10   4   9   -8.00   26.43
   9  -5  -9   59.08   40.73
   8  -5  -9   44.08   32.16
  -8   5   9    4.74   28.67
   7  -5  -9  143.90   33.14
  -7   5   9   71.03   31.14
  -6   5   9   50.59   29.16
   6  -5  -9  135.79   35.15
   5  -5  -9   29.43   24.16
  -5   5   9  -23.61   20.98
  -4   5   9  -11.22   20.71
   4  -5  -9   12.55   20.66
  -3   5   9  544.03   55.73
   3  -5  -9  587.69   63.33
   2  -5  -9  146.40   37.48
  -2   5   9  155.29   30.25
  -1   5   9  152.06   16.77
  -1   5   9  195.83   30.27
   0   5   9    3.62    9.09
   0   5   9   11.31   16.51
   1   5   9   -1.93    9.55
   1   5   9   -2.02   11.97
   2   5   9   96.31   17.80
   2   5   9   94.65   18.56
   3   5   9   -5.88   13.72
   3   5   9  -13.46   13.50
   4   5   9   31.92   21.17
   4   5   9   40.36   17.87
   5   5   9   88.73   21.83
   5   5   9   91.61   26.05
   6   5   9  -12.26   20.99
   7   5   9    4.77   24.49
   8   5   9   16.82   29.04
   9   5   9   63.02   30.78
  10   5   9  -15.56   28.35
   9  -6  -9   18.73   36.05
   8  -6  -9  178.94   39.95
  -8   6   9   41.00   39.46
  -7   6   9   14.84   32.99
   7  -6  -9   58.56   32.10
  -6   6   9   -2.51   28.39
   6  -6  -9   40.01   24.45
   5  -6  -9   28.94   25.41
  -5   6   9   -8.83   23.36
  -4   6   9  -14.75   23.07
   4  -6  -9   36.90   21.64
   3  -6  -9   39.41   25.27
  -3   6   9    2.80   24.41
  -2   6   9  191.66   41.41
   2  -6  -9  228.74   37.59
  -1   6   9  596.73   57.94
  -1   6   9  674.98   44.18
   0   6   9    5.57   10.41
   0   6   9    8.04   17.62
   1   6   9  102.13   22.41
   1   6   9  119.00   24.04
   2   6   9  276.40   29.84
   2   6   9  258.65   29.88
   3   6   9  467.04   43.68
   3   6   9  454.69   42.47
   4   6   9   41.24   20.77
   4   6   9   48.31   21.96
   5   6   9  250.76   32.33
   5   6   9  284.75   34.99
   6   6   9    7.58   21.21
   7   6   9  192.14   35.37
   8   6   9    8.68   25.39
   9   6   9   45.93   37.00
  10   6   9   17.18   33.22
  10  -7  -9   27.21   41.98
   9  -7  -9   65.30   39.18
  -8   7   9  -11.49   39.94
   8  -7  -9   45.12   33.84
   6  -7  -9  187.27   36.88
  -6   7   9   71.57   33.57
  -5   7   9   62.52   31.60
   5  -7  -9  180.12   34.17
   4  -7  -9   -4.84   17.66
  -3   7   9   25.14   29.73
   3  -7  -9   87.38   28.42
   2  -7  -9  174.19   32.87
  -2   7   9  228.98   36.50
  -1   7   9   -3.60    9.38
   1  -7  -9    3.15   16.98
   0   7   9  462.02   44.90
   0   7   9  408.66   34.45
   1   7   9    2.78   14.40
   1   7   9   -1.49   11.99
   2   7   9  337.02   33.22
   2   7   9  312.57   34.25
   3   7   9   47.56   21.21
   3   7   9   51.08   19.54
   4   7   9 1068.91   86.30
   4   7   9 1168.92   84.04
   5   7   9   -1.41   19.86
   5   7   9    3.20   18.92
   6   7   9  155.96   26.84
   6   7   9  186.71   34.23
   7   7   9  -21.75   25.31
   8   7   9  102.05   38.10
   9   7   9   29.34   32.97
  10   7   9  -11.74   30.58
  10  -8  -9   65.04   43.77
   9  -8  -9   56.48   37.44
   8  -8  -9  236.45   46.35
  -7   8   9   -9.68   34.76
   7  -8  -9   23.67   30.21
   6  -8  -9  238.54   38.56
  -6   8   9  161.45   43.33
   5  -8  -9   48.29   28.41
  -5   8   9   15.71   31.20
  -4   8   9  230.97   48.23
   4  -8  -9  203.00   37.58
  -3   8   9  102.65   36.44
   3  -8  -9   75.00   29.54
   2  -8  -9  307.78   45.18
  -2   8   9  422.66   49.14
  -1   8   9  171.86   30.91
   1  -8  -9  155.54   32.15
   0   8   9  106.74   25.02
   1   8   9   50.82   17.70
   1   8   9   62.73   20.05
   2   8   9   79.70   21.91
   2   8   9   84.12   23.91
   3   8   9  324.39   34.82
   3   8   9  288.65   35.60
   4   8   9    0.78   20.08
   4   8   9   10.85   19.89
   5   8   9   18.31   22.63
   5   8   9    2.69   21.62
   6   8   9   11.82   25.69
   6   8   9   16.99   26.62
   7   8   9  -16.65   29.88
   8   8   9   13.83   35.31
   9   8   9   30.30   41.26
  10   8   9  -22.69   38.27
  10  -9  -9   38.57   42.90
   9  -9  -9   63.07   38.84
   8  -9  -9   89.80   39.90
  -7   9   9   38.96   41.26
   7  -9  -9   99.61   39.22
  -6   9   9    1.79   30.59
   6  -9  -9   40.15   26.63
  -5   9   9   -7.55   30.90
   5  -9  -9   81.76   30.63
  -4   9   9   49.91   32.74
   4  -9  -9   72.25   30.28
  -3   9   9   83.69   36.75
   3  -9  -9   85.35   28.04
   2  -9  -9   62.69   27.77
  -2   9   9   16.66   22.88
  -1   9   9   27.67   20.79
   1  -9  -9   41.98   25.02
   0   9   9  111.99   28.73
   1   9   9   -4.28   13.39
   2   9   9  167.09   23.93
   2   9   9  144.31   25.02
   3   9   9   -4.26   19.11
   3   9   9   -8.84   16.40
   4   9   9  137.52   32.32
   4   9   9  147.83   32.38
   5   9   9  201.51   36.27
   5   9   9  210.19   42.21
   6   9   9  182.37   33.81
   6   9   9  226.55   38.98
   7   9   9   28.79   31.51
   8   9   9   -2.79   37.74
   9   9   9    1.04   36.24
   9 -10  -9   51.93   40.60
   8 -10  -9   79.58   39.66
  -7  10   9   -7.72   34.34
   7 -10  -9   34.17   33.62
  -6  10   9    5.14   38.10
   6 -10  -9   65.16   33.38
  -5  10   9   46.61   38.26
   5 -10  -9  143.70   34.67
  -4  10   9  -32.58   29.58
  -3  10   9   79.11   38.31
   3 -10  -9  137.96   33.83
   2 -10  -9   36.22   23.49
  -2  10   9   45.51   30.89
   1 -10  -9  154.71   34.32
  -1  10   9  167.22   29.99
   0  10   9  123.39   29.81
   0 -10  -9   92.39   29.01
   1  10   9  353.96   38.87
   2  10   9  135.93   31.25
   3  10   9  485.77   48.07
   3  10   9  475.33   44.17
   4  10   9   26.13   25.71
   4  10   9    7.04   21.61
   5  10   9  507.69   53.22
   5  10   9  436.92   49.98
   6  10   9  -29.05   26.76
   6  10   9  -28.15   25.69
   7  10   9  142.42   41.74
   8  10   9  -27.96   34.51
   9  10   9   -5.11   42.03
   9 -11  -9  152.38   52.75
   8 -11  -9   26.12   38.20
   7 -11  -9  117.73   43.19
  -6  11   9    0.20   34.24
   6 -11  -9    9.63   30.25
   5 -11  -9  219.53   39.69
  -5  11   9  203.15   53.46
   4 -11  -9  110.32   35.93
  -4  11   9   76.50   42.54
  -3  11   9   32.05   30.85
   3 -11  -9   74.93   32.45
  -2  11   9  125.54   38.66
   2 -11  -9   61.71   28.88
   1 -11  -9  198.29   36.90
  -1  11   9  218.46   36.58
   0 -11  -9   84.78   30.80
   0  11   9   96.26   29.71
   1  11   9  181.67   30.96
   2  11   9  175.02   30.41
   3  11   9  -12.60   19.38
   4  11   9   88.00   31.59
   4  11   9   80.31   26.94
   5  11   9   -4.69   22.92
   5  11   9   -6.35   28.01
   6  11   9   35.19   32.92
   6  11   9   26.13   26.88
   7  11   9  -32.56   32.12
   8  11   9   -6.36   39.22
   9  11   9  -62.46   39.43
   9 -12  -9   83.96   47.97
   8 -12  -9   68.82   41.97
   7 -12  -9   45.67   33.98
   6 -12  -9  169.13   39.85
  -6  12   9   53.21   42.12
   5 -12  -9   48.76   34.55
  -5  12   9    7.70   36.51
  -4  12   9  217.94   59.22
   4 -12  -9  191.22   41.07
  -3  12   9  -12.63   33.94
   3 -12  -9   32.69   28.79
   2 -12  -9   -0.62   27.00
  -2  12   9  -22.74   29.33
  -1  12   9   32.86   29.74
   1 -12  -9  -15.89   25.24
   0  12   9  154.48   37.33
   0 -12  -9  126.76   31.97
   1  12   9  230.17   36.19
   2  12   9   17.26   22.98
   3  12   9   38.65   27.96
   4  12   9   14.22   28.71
   5  12   9  123.28   38.84
   6  12   9   -7.95   30.63
   6  12   9   -4.76   29.92
   7  12   9  -20.76   26.37
   7  12   9   -9.83   30.94
   8  12   9  -26.87   37.94
   8 -13  -9   68.75   46.10
   7 -13  -9   61.72   41.09
   6 -13  -9   80.21   40.71
  -6  13   9   19.82   45.61
  -4  13   9  117.90   48.33
   4 -13  -9  123.75   37.74
  -2  13   9   54.78   34.48
   2 -13  -9   35.14   27.94
  -1  13   9    3.43   29.85
   0 -13  -9  154.29   35.67
   0  13   9  242.42   38.81
   1  13   9    0.24   19.67
   2  13   9  405.96   47.40
   3  13   9    8.85   23.63
   4  13   9   97.66   37.00
   5  13   9  -19.40   29.91
   6  13   9  178.87   47.91
   7  13   9  -12.53   39.55
   8  13   9  -53.83   36.79
   8 -14  -9   78.02   50.32
   7 -14  -9   36.61   43.17
   6 -14  -9   92.44   44.69
  -6  14   9   57.44   50.83
  -5  14   9   23.00   47.64
   5 -14  -9   53.73   40.02
  -4  14   9   17.61   43.48
   4 -14  -9   95.27   36.61
  -3  14   9  116.23   48.51
   3 -14  -9  160.87   44.58
  -2  14   9    4.64   35.42
   2 -14  -9   56.92   33.03
   1 -14  -9  100.21   35.26
  -1  14   9    3.19   31.24
   0 -14  -9  122.41   30.71
   0  14   9    4.29   30.53
   1  14   9  198.05   36.26
   2  14   9   -6.57   21.65
   3  14   9   41.57   30.76
   4  14   9  -34.73   27.12
   5  14   9   92.39   41.04
   6  14   9  -24.65   33.47
   7  14   9  -10.02   41.98
   7 -15  -9   79.26   45.05
   6 -15  -9  104.85   48.73
   5 -15  -9  229.56   48.34
  -5  15   9  143.44   61.10
   4 -15  -9   60.99   40.43
  -4  15   9   -1.49   41.89
   3 -15  -9  147.79   44.72
  -3  15   9   39.47   45.66
   2 -15  -9   41.87   32.87
  -2  15   9    0.82   35.46
   1 -15  -9   13.80   28.86
  -1  15   9   -8.79   32.60
   0  15   9  -12.69   22.90
   1  15   9   21.40   29.88
   2  15   9   14.10   24.52
   3  15   9  -42.95   27.72
   4  15   9   37.13   34.26
   5  15   9  -18.14   34.85
   6  15   9  -26.76   37.56
   7  15   9  -44.56   40.05
   6 -16  -9  115.60   53.26
   5 -16  -9   80.52   47.22
  -5  16   9   -8.14   45.03
  -4  16   9   19.33   47.58
  -3  16   9   16.42   44.39
   3 -16  -9   92.02   41.84
   2 -16  -9  157.10   38.01
  -2  16   9   12.05   39.67
  -1  16   9  101.52   46.43
   1 -16  -9  137.12   40.34
   0  16   9  -29.88   29.41
   1  16   9   11.67   31.47
   2  16   9   -7.15   25.45
   3  16   9   98.57   36.64
   4  16   9  -39.24   33.34
   5  16   9   35.98   40.62
   6  16   9  -36.57   40.02
   6 -17  -9   61.76   50.48
  -5  17   9  -41.26   46.54
   5 -17  -9   95.59   50.63
  -4  17   9    5.22   48.39
   4 -17  -9   26.94   36.26
  -3  17   9   18.23   48.59
  -2  17   9   26.76   46.18
   2 -17  -9  158.86   45.85
  -1  17   9  -20.45   36.76
   0  17   9    9.71   36.68
   1  17   9  -15.71   31.80
   2  17   9   60.20   37.95
   3  17   9  -15.69   33.14
   4  17   9   67.69   43.99
   6  17   9   25.29   45.87
   5 -18  -9   39.83   47.06
  -4  18   9  -31.40   51.38
   4 -18  -9   88.19   49.68
   3 -18  -9   53.83   44.09
  -3  18   9  -48.81   51.46
  -2  18   9   69.82   51.40
   2 -18  -9  132.95   43.15
  -1  18   9  -31.41   38.64
   0  18   9  -39.90   35.46
   1  18   9  -36.76   36.10
   2  18   9  -13.00   36.92
   3  18   9    7.13   38.84
   4  18   9  -18.49   39.13
   5  18   9  -29.32   35.80
  -4  19   9  -59.66   57.32
   4 -19  -9   81.35   49.67
   3 -19  -9  113.69   49.68
  -3  19   9   -8.60   56.30
  -2  19   9  -10.34   46.84
  -1  19   9  -19.61   43.04
   0  19   9   28.74   44.49
   1  19   9  -59.49   36.68
   2  19   9  -32.78   37.81
   3  19   9  -36.29   36.59
   4  19   9    5.78   43.29
  -3  20   9  -47.21   56.56
  -2  20   9   27.19   54.53
  -1  20   9   32.04   50.79
   0  20   9  -35.26   44.88
   1  20   9  -55.54   40.71
   2  20   9  -19.56   42.51
  -3 -19  10  -19.37   12.25
   2 -19  10    8.56   18.60
   3 -19  10   -2.11   20.60
  -5 -18  10   21.76   15.87
  -4 -18  10  -15.52   12.49
  -3 -18  10   -5.00   13.89
  -2 -18  10   -5.68   15.91
   2 -18  10  -10.35   16.92
   3 -18  10   63.05   26.06
   4 -18  10   -4.63   24.26
  -6 -17  10   23.53   15.44
  -5 -17  10    4.98   14.41
  -4 -17  10   -4.92   13.56
  -3 -17  10   -4.27   13.52
  -2 -17  10   37.46   17.68
   3 -17  10  -11.52   19.78
   4 -17  10   32.91   28.02
   5 -17  10  -18.27   28.38
  -6 -16  10   27.48   18.26
  -5 -16  10   -0.84   13.71
  -4 -16  10    4.30   13.74
  -3 -16  10   33.19   15.46
  -2 -16  10   30.09   16.00
   4 -16  10    3.80   25.05
   5 -16  10   10.87   24.71
   6 -16  10   11.28   27.83
  -7 -15  10   16.20   18.95
  -6 -15  10    7.94   15.90
  -5 -15  10    5.15   16.06
  -4 -15  10   92.55   21.59
  -3 -15  10    3.62   13.36
  -2 -15  10  106.18   20.98
  -1 -15  10  -11.29   14.58
   1 -15  10  -19.78   23.91
   5 -15  10    1.84   26.23
   6 -15  10    7.82   26.22
  -7 -14  10   23.65   20.82
  -6 -14  10  -22.45   14.95
  -5 -14  10   43.95   19.26
  -4 -14  10   40.53   15.59
  -3 -14  10   69.60   18.40
  -2 -14  10   -5.66   13.19
  -1 -14  10   56.43   17.48
   1 -14  10   23.64   27.30
   2 -14  10   22.63   25.15
   3 -14  10   20.25   21.75
   6 -14  10    9.87   24.82
   7 -14  10    0.53   30.35
  -8 -13  10   25.85   23.74
  -7 -13  10   16.55   21.16
  -6 -13  10  -15.63   16.83
  -5 -13  10  128.36   22.60
  -4 -13  10   29.81   16.71
  -3 -13  10    3.91   14.82
  -2 -13  10   -1.65   13.74
  -1 -13  10   -5.26   12.38
   0 -13  10   -9.13   11.22
   1 -13  10  -10.53   23.94
   2 -13  10   10.10   18.68
   3 -13  10   66.20   26.55
   4 -13  10   14.38   20.61
   6 -13  10   -9.56   20.59
   7 -13  10   41.52   28.71
   8 -13  10  -19.63   27.83
  -8 -12  10   27.72   24.76
  -7 -12  10   35.43   23.84
  -6 -12  10   -7.30   18.05
  -5 -12  10   44.85   22.01
  -4 -12  10   35.70   16.93
  -3 -12  10  310.66   32.49
  -2 -12  10   17.04   14.14
  -1 -12  10   92.64   19.60
   0 -12  10   15.92   14.95
   1 -12  10  216.73   33.33
   2 -12  10   23.01   22.34
   3 -12  10   54.60   25.66
   4 -12  10   -1.93   20.37
   5 -12  10   28.79   22.49
   7 -12  10    8.32   26.80
   8 -12  10   15.82   31.08
  -9 -11  10   24.10   26.22
  -8 -11  10   87.81   30.01
  -7 -11  10   34.06   23.09
  -6 -11  10   -6.48   16.11
  -5 -11  10   14.63   18.46
  -4 -11  10  238.85   29.43
  -3 -11  10  -11.92   13.30
  -2 -11  10  145.04   21.49
  -1 -11  10   17.11   12.97
   0 -11  10  159.79   21.83
   1 -11  10   21.48   22.36
   2 -11  10  260.50   33.33
   3 -11  10   -5.74   19.87
   4 -11  10   12.06   19.16
   5 -11  10   -2.71   17.63
   6 -11  10   81.53   31.38
   7 -11  10    3.42   24.85
   8 -11  10    8.46   24.90
   9 -11  10   10.49   32.82
  -9 -10  10   36.60   27.53
  -8 -10  10   63.27   26.81
  -7 -10  10    6.25   21.73
  -6 -10  10   46.56   22.47
  -5 -10  10   21.38   20.07
  -4 -10  10   15.89   17.56
  -3 -10  10   10.02   15.29
  -2 -10  10   -8.91   11.95
  -1 -10  10   -5.52   13.74
   0 -10  10   -7.36   10.55
   1 -10  10   84.64   23.29
   2 -10  10    4.96   19.69
   3 -10  10  -11.72   16.33
   4 -10  10    7.69   23.50
   5 -10  10   16.86   22.71
   6 -10  10   46.55   28.45
   7 -10  10   -3.06   19.62
   7 -10  10  -19.71   23.64
   8 -10  10   33.25   30.61
   8 -10  10   17.00   27.78
   9 -10  10  -19.72   29.28
  -9  -9  10   35.66   25.86
  -8  -9  10   15.90   22.30
  -7  -9  10   10.32   20.52
  -6  -9  10  158.29   26.96
  -5  -9  10  -12.73   17.97
  -4  -9  10  301.27   33.36
  -3  -9  10   -6.06   12.36
  -2  -9  10  166.17   22.07
  -1  -9  10    9.72   12.28
   0  -9  10  235.50   24.77
   1  -9  10   -3.88   11.33
   1  -9  10    0.64   16.84
   2  -9  10   25.86   19.83
   3  -9  10   18.42   22.58
   4  -9  10  185.54   34.85
   5  -9  10    8.73   19.77
   6  -9  10   37.45   28.71
   7  -9  10   77.66   28.84
   8  -9  10   10.27   24.36
   8  -9  10   -2.91   24.90
   9  -9  10   22.43   30.89
   9  -9  10   18.75   30.84
 -10  -8  10   39.71   31.44
  -9  -8  10    1.51   23.59
  -8  -8  10   27.02   23.84
  -7  -8  10   68.22   23.61
  -6  -8  10   83.99   25.43
  -5  -8  10  222.58   29.40
  -4  -8  10   -6.64   15.12
  -3  -8  10   98.76   19.69
  -2  -8  10  118.66   20.01
  -1  -8  10  401.61   35.46
   0  -8  10    4.61   13.82
   1  -8  10  202.85   21.15
   1  -8  10  164.00   23.41
   2  -8  10   20.63   19.95
   3  -8  10  208.29   29.82
   4  -8  10   42.62   23.23
   5  -8  10  190.59   32.40
   6  -8  10   34.08   27.54
   7  -8  10   17.00   24.89
   8  -8  10   -2.96   20.65
   8  -8  10   18.07   27.84
   9  -8  10   28.10   26.87
   9  -8  10   23.20   30.54
 -10  -7  10   11.08   28.32
  -9  -7  10    5.53   22.22
  -8  -7  10   14.99   19.14
  -7  -7  10  127.33   28.64
  -6  -7  10   22.69   17.09
  -5  -7  10   -1.28   14.15
  -4  -7  10   62.97   20.44
  -3  -7  10  120.12   20.76
  -2  -7  10  109.44   22.03
   0  -7  10   -4.41   11.02
   1  -7  10  160.43   22.82
   1  -7  10  137.96   17.14
   2  -7  10   14.63   19.47
   3  -7  10   63.64   23.15
   4  -7  10   65.68   24.58
   5  -7  10  290.32   37.73
   6  -7  10   74.25   30.39
   7  -7  10   99.14   31.57
   8  -7  10    7.69   21.98
   8  -7  10   18.29   28.49
   9  -7  10   88.86   32.84
   9  -7  10   98.45   37.11
  10  -7  10  -12.26   28.42
 -10  -6  10   65.77   29.57
  -9  -6  10   -4.25   21.83
  -8  -6  10   80.21   27.16
  -7  -6  10    7.81   16.19
  -6  -6  10  221.64   30.25
  -5  -6  10   51.04   18.12
  -4  -6  10   -3.58   15.52
  -3  -6  10    3.40   13.59
  -2  -6  10  363.05   34.56
  -1  -6  10  272.70   27.85
   0  -6  10   87.51   18.11
   1  -6  10   69.88   13.24
   1  -6  10   38.40   15.94
   2  -6  10  -20.02   12.43
   3  -6  10  219.16   29.33
   4  -6  10   47.58   24.55
   5  -6  10   91.05   30.30
   6  -6  10   93.89   30.67
   7  -6  10   11.12   22.36
   8  -6  10   21.47   27.91
   9  -6  10   -3.63   26.83
   9  -6  10    4.00   27.82
  10  -6  10   55.58   34.49
 -10  -5  10   52.39   27.03
  -9  -5  10   -2.30   21.97
  -8  -5  10   10.08   20.41
  -7  -5  10  -15.47   17.85
  -6  -5  10  356.80   38.36
  -5  -5  10   39.22   16.92
  -4  -5  10   58.61   18.59
  -2  -5  10  930.94   69.91
   0  -5  10  845.21   61.70
   1  -5  10   54.15   11.03
   1  -5  10   67.88   17.82
   2  -5  10  235.15   29.30
   2  -5  10  219.37   20.62
   3  -5  10   13.36   18.26
   4  -5  10  311.42   35.29
   5  -5  10   73.99   25.27
   6  -5  10   91.15   26.63
   7  -5  10   10.82   21.43
   8  -5  10  135.78   35.86
   9  -5  10   46.24   31.26
  10  -5  10   20.28   32.18
 -10  -4  10   36.04   27.17
  -9  -4  10    8.52   23.01
  -8  -4  10   35.25   21.76
  -7  -4  10   18.55   19.45
  -6  -4  10    8.31   15.39
  -5  -4  10  173.22   25.79
  -4  -4  10   12.28   14.86
  -3  -4  10  -12.36   11.48
  -1  -4  10  862.21   63.93
   0  -4  10   63.15   13.51
   1  -4  10   52.91   11.95
   1  -4  10   54.87   17.99
   2  -4  10   52.66   20.57
   2  -4  10   26.97   12.13
   3  -4  10  316.62   35.21
   4  -4  10   95.13   24.30
   5  -4  10  132.70   29.76
   6  -4  10   78.65   25.33
   7  -4  10   21.15   24.92
   8  -4  10   70.50   27.09
   9  -4  10   25.18   26.04
  10  -4  10   38.73   27.33
 -10  -3  10   14.95   25.10
  -9  -3  10   65.77   27.65
  -8  -3  10   35.69   21.55
  -7  -3  10  113.96   23.47
  -6  -3  10   -5.50   16.16
  -5  -3  10   16.27   18.21
  -4  -3  10  127.78   22.72
  -3  -3  10   51.75   20.50
  -2  -3  10   -9.54   14.79
  -1  -3  10    6.32   11.34
   0  -3  10   40.63   12.48
   1  -3  10  412.22   33.35
   1  -3  10  409.01   35.78
   2  -3  10   22.53   16.05
   3  -3  10  115.11   25.13
   4  -3  10   72.44   23.91
   5  -3  10   54.44   22.17
   6  -3  10  154.36   33.52
   7  -3  10   79.39   26.10
   8  -3  10    2.21   24.79
   9  -3  10   55.49   25.73
  10  -3  10   15.40   29.26
 -10  -2  10   15.50   27.27
  -9  -2  10   72.61   27.32
  -8  -2  10   13.89   21.34
  -7  -2  10  116.07   23.94
  -6  -2  10   14.00   18.89
  -5  -2  10  190.19   27.28
  -3  -2  10 1059.74   78.96
  -2  -2  10  144.67   21.39
  -1  -2  10  400.52   34.49
   0  -2  10   22.25   11.55
   0  -2  10    1.14   10.09
   1  -2  10 1390.60   95.30
   1  -2  10 1567.99  102.87
   2  -2  10    7.03   16.65
   3  -2  10  249.43   29.64
   4  -2  10   25.14   17.51
   5  -2  10  203.03   27.79
   6  -2  10   75.77   26.55
   7  -2  10  148.43   31.01
   8  -2  10   20.41   22.24
   9  -2  10   15.50   26.19
  10  -2  10   15.62   29.57
 -10  -1  10   28.44   29.07
  10   1 -10    5.81   15.93
   9   1 -10   91.12   19.82
  -9  -1  10   86.89   29.29
  -8  -1  10   24.78   22.02
  -7  -1  10    8.42   19.41
  -6  -1  10    1.11   17.75
  -5  -1  10  141.93   24.35
  -4  -1  10  121.72   22.42
  -3  -1  10   21.15   15.40
  -2  -1  10   88.76   19.85
  -1  -1  10   63.62   16.11
   0  -1  10  458.64   35.16
   0  -1  10  436.53   37.45
   1  -1  10  -19.71   11.95
   1  -1  10   10.58   14.50
   2  -1  10  829.45   62.94
   2  -1  10  857.07   61.70
   3  -1  10   37.93   19.16
   3  -1  10   41.15   14.06
   4  -1  10   29.11   17.02
   5  -1  10   26.26   18.25
   6  -1  10  220.55   30.10
   7  -1  10   42.24   22.36
   8  -1  10   16.51   21.80
   9  -1  10   19.43   23.42
  10  -1  10    5.03   24.07
 -10   0  10  117.56   39.84
  -9   0  10   50.51   29.88
   9   0 -10    6.47   14.70
  -8   0  10    6.78   20.53
  -7   0  10  -17.05   17.03
  -6   0  10   -1.33   15.92
  -5   0  10  -15.52   12.50
  -4   0  10   48.62   17.13
  -3   0  10  -10.63   10.01
  -2   0  10   69.75   18.53
  -1   0  10  -15.48   10.67
   0   0  10   -0.34   15.35
   0   0  10   16.85   10.49
   1   0  10    0.92   10.64
   1   0  10   -8.55   12.77
   2   0  10  536.54   44.96
   2   0  10  533.51   43.87
   3   0  10  -17.00   11.21
   3   0  10   -7.69   10.33
   4   0  10  218.91   26.90
   5   0  10   -0.17   16.57
   6   0  10  134.58   24.29
   7   0  10   -1.00   17.83
   8   0  10  172.71   36.90
   9   0  10    3.50   25.01
  10   0  10   69.76   33.80
  -9   1  10   88.43   33.30
  -8   1  10   23.38   22.64
  -7   1  10    8.43   18.49
  -6   1  10   32.33   20.09
  -5   1  10  106.28   20.14
  -4   1  10  132.01   22.66
  -3   1  10   36.74   14.93
  -2   1  10   91.61   19.25
  -1   1  10   74.21   19.97
   0   1  10  433.32   40.58
   0   1  10  467.89   35.58
   1   1  10    7.95   12.31
   1   1  10   -2.06   13.62
   2   1  10  881.13   64.19
   2   1  10  951.77   69.13
   3   1  10   42.18   16.64
   3   1  10   57.54   16.07
   4   1  10   28.59   16.57
   5   1  10   16.44   15.34
   6   1  10  215.89   29.69
   7   1  10   28.36   23.74
   8   1  10   33.35   25.49
   9   1  10   15.94   27.53
  10   1  10   19.99   26.33
  -9   2  10   27.97   31.96
  -8   2  10   20.55   25.14
  -7   2  10  115.27   29.93
  -6   2  10   29.59   20.29
  -5   2  10  178.68   27.16
  -4   2  10  -11.40   15.59
  -3   2  10  867.67   69.50
  -2   2  10  188.03   26.87
  -1   2  10  304.65   32.67
   0   2  10    6.10   16.39
   0   2  10   11.21   11.73
   1   2  10 1781.62  109.99
   1   2  10 1707.45  123.43
   2   2  10   -7.38   14.18
   2   2  10    4.96   12.88
   3   2  10  227.60   26.12
   3   2  10  230.26   25.50
   4   2  10    5.55   12.27
   4   2  10   15.47   15.37
   5   2  10  304.65   34.47
   6   2  10   88.03   27.76
   7   2  10  177.82   29.54
   8   2  10   14.98   22.78
   9   2  10   -7.28   17.86
  10   2  10   -8.73   27.47
  -9   3  10   77.90   42.89
   8  -3 -10   39.55   37.87
  -8   3  10   30.01   28.14
  -7   3  10  106.73   30.62
   7  -3 -10  171.49   46.73
  -6   3  10   20.16   21.33
   6  -3 -10   15.58   28.53
  -5   3  10   10.07   21.35
   5  -3 -10   41.55   27.48
  -4   3  10  132.77   30.70
  -3   3  10   26.50   24.39
  -2   3  10    8.63   20.94
  -1   3  10   19.92    9.23
  -1   3  10   -2.01   19.72
   0   3  10   56.78   14.43
   0   3  10   62.94   21.04
   1   3  10  488.38   39.94
   1   3  10  529.98   45.92
   2   3  10   36.13   15.34
   2   3  10   31.56   15.90
   3   3  10   92.50   19.16
   3   3  10  119.86   22.99
   4   3  10   55.75   18.05
   4   3  10   78.97   23.66
   5   3  10   83.66   24.59
   6   3  10   94.60   25.54
   7   3  10   68.10   25.10
   8   3  10   -9.35   22.18
   9   3  10   68.27   28.47
  10   3  10  -29.25   27.12
   9  -4 -10   25.88   39.13
  -9   4  10   12.38   40.40
   8  -4 -10   96.56   43.36
  -8   4  10   61.08   31.51
  -7   4  10   23.08   26.18
   7  -4 -10   49.74   34.14
   6  -4 -10   51.71   27.67
  -6   4  10    7.90   22.94
   5  -4 -10  195.36   36.50
  -5   4  10  127.25   32.60
   4  -4 -10   43.78   27.47
  -4   4  10   -5.17   18.23
  -3   4  10  -26.01   19.53
  -2   4  10  -10.24   20.74
  -1   4  10  697.10   50.92
  -1   4  10  839.19   67.59
   0   4  10   90.45   17.45
   0   4  10   81.35   22.26
   1   4  10   54.07   15.76
   1   4  10   61.31   20.12
   2   4  10   71.28   18.21
   2   4  10   77.96   19.44
   3   4  10  327.45   33.18
   3   4  10  321.74   32.79
   4   4  10   94.06   26.05
   4   4  10   85.58   21.56
   5   4  10  134.85   24.33
   6   4  10   78.12   29.18
   7   4  10   33.06   23.80
   8   4  10   80.76   28.95
   9   4  10   34.07   33.01
  10   4  10   43.71   37.18
   9  -5 -10    1.34   37.49
   8  -5 -10   22.13   33.75
  -8   5  10    5.36   31.28
  -7   5  10  -14.56   25.06
   7  -5 -10   40.74   32.17
   6  -5 -10  418.24   58.22
   5  -5 -10   84.22   33.72
  -5   5  10   29.84   26.61
  -4   5  10   35.51   27.62
   4  -5 -10   80.66   33.11
   3  -5 -10  -13.64   17.93
  -2   5  10  820.45   73.18
  -1   5  10  -20.60   15.83
  -1   5  10  -10.57    8.93
   0   5  10  785.64   54.87
   0   5  10  796.32   66.43
   1   5  10  107.28   23.51
   1   5  10   65.36   18.95
   2   5  10  302.15   32.53
   2   5  10  311.24   31.29
   3   5  10   -5.90   14.26
   3   5  10   -4.82   14.22
   4   5  10  522.75   46.52
   4   5  10  484.08   45.05
   5   5  10   57.33   21.43
   5   5  10   64.11   24.79
   6   5  10  113.95   33.96
   7   5  10  -11.80   21.23
   8   5  10  158.49   39.15
   9   5  10    9.52   31.06
  10   5  10  -23.43   31.85
   9  -6 -10   16.69   37.21
   8  -6 -10  182.22   49.00
  -8   6  10   36.47   34.32
   7  -6 -10    9.96   28.56
  -7   6  10   -8.94   26.94
   6  -6 -10  205.44   40.22
  -6   6  10  112.62   37.17
   5  -6 -10  122.82   37.09
   4  -6 -10    5.12   21.45
  -4   6  10  -36.19   21.52
  -3   6  10  -35.70   22.83
   3  -6 -10   -5.83   22.61
  -2   6  10  229.03   21.36
  -2   6  10  303.46   41.22
  -1   6  10  187.48   30.59
  -1   6  10  205.22   20.77
   0   6  10  144.06   30.35
   0   6  10  100.65   17.38
   1   6  10  114.94   25.10
   1   6  10   85.70   21.47
   2   6  10   -5.99   13.00
   2   6  10  -12.19   14.25
   3   6  10  329.87   36.06
   3   6  10  337.69   36.06
   4   6  10   43.53   24.83
   4   6  10   47.74   20.97
   5   6  10   53.77   27.75
   5   6  10   83.75   25.40
   6   6  10   70.04   29.42
   7   6  10  -16.11   25.57
   8   6  10    7.65   32.14
   9   6  10   -7.05   29.80
  10   6  10   29.24   39.67
  10  -7 -10   48.33   44.61
   9  -7 -10   32.36   37.99
  -8   7  10  -17.83   38.60
   8  -7 -10   67.20   37.64
  -7   7  10   69.57   40.04
   7  -7 -10  134.06   33.25
   6  -7 -10   80.39   30.14
  -6   7  10    3.29   27.57
  -5   7  10   -2.19   26.36
  -4   7  10   16.25   27.97
   4  -7 -10   50.40   26.69
   3  -7 -10  129.35   32.68
  -3   7  10   79.31   34.97
  -2   7  10   98.69   33.66
   2  -7 -10  116.82   33.82
  -1   7  10  -14.98   19.54
   0   7  10   13.73   13.61
   0   7  10    8.39   20.18
   1   7  10  210.00   29.02
   1   7  10  176.01   23.50
   2   7  10   44.86   21.28
   2   7  10   61.96   21.68
   3   7  10  141.98   30.56
   3   7  10  122.70   27.99
   4   7  10   68.13   25.41
   4   7  10   72.92   26.03
   5   7  10  451.84   48.28
   5   7  10  424.90   44.78
   6   7  10   64.01   30.41
   7   7  10  143.18   41.80
   8   7  10    7.18   29.13
   9   7  10   94.49   45.30
  10   7  10   -1.28   36.98
  10  -8 -10   52.33   46.51
   9  -8 -10   44.29   38.38
  -8   8  10   -6.13   35.25
   8  -8 -10   77.20   38.84
   7  -8 -10  104.36   38.61
  -7   8  10   23.65   38.18
   5  -8 -10  188.53   34.72
  -5   8  10   83.25   37.82
  -4   8  10  -27.15   25.35
   3  -8 -10  124.68   31.81
  -3   8  10  111.72   37.66
  -2   8  10  163.92   40.94
   2  -8 -10  148.90   32.16
  -1   8  10  475.11   52.31
   0   8  10   34.71   23.99
   1   8  10  200.96   28.99
   1   8  10  260.18   27.87
   2   8  10   30.98   21.78
   2   8  10   30.27   20.66
   3   8  10  414.51   41.07
   3   8  10  383.32   42.15
   4   8  10   92.96   28.05
   4   8  10   92.77   30.39
   5   8  10  258.71   36.04
   5   8  10  242.51   37.91
   6   8  10   -0.36   30.01
   6   8  10   -6.96   22.54
   7   8  10   36.12   32.54
   8   8  10  -19.09   30.27
   9   8  10  -16.47   33.47
   9  -9 -10   64.34   41.63
   8  -9 -10   66.03   38.77
   7  -9 -10   43.47   32.67
  -7   9  10   -6.65   32.51
  -6   9  10   85.46   39.59
   6  -9 -10  173.69   38.25
  -5   9  10  -13.78   30.70
   5  -9 -10   40.50   25.92
  -4   9  10  253.83   55.30
   4  -9 -10  296.25   43.20
   3  -9 -10    0.01   20.03
  -3   9  10  -16.36   27.75
  -2   9  10  137.16   35.23
   2  -9 -10  146.66   33.95
   1  -9 -10    6.75   21.80
  -1   9  10   11.92   23.41
   0   9  10  279.90   35.73
   1   9  10   16.48   20.41
   2   9  10   90.91   24.95
   2   9  10  114.80   25.93
   3   9  10   60.62   25.43
   3   9  10   64.81   23.44
   4   9  10  254.37   36.13
   4   9  10  247.61   34.97
   5   9  10   -1.12   26.48
   5   9  10   19.73   29.06
   6   9  10   20.95   27.70
   6   9  10   15.19   32.60
   7   9  10  101.97   39.57
   8   9  10  -43.93   34.51
   9   9  10    5.20   41.13
   9 -10 -10   43.04   37.81
   8 -10 -10  132.65   47.00
  -7  10  10   -1.02   39.94
   7 -10 -10   34.80   30.54
  -6  10  10   34.11   36.16
   6 -10 -10   75.62   36.71
  -5  10  10   -5.65   33.87
  -4  10  10  -13.81   32.76
   4 -10 -10   30.98   26.03
  -3  10  10    3.36   33.14
   3 -10 -10   44.89   25.67
   2 -10 -10   10.07   22.70
  -2  10  10  -11.45   26.49
   1 -10 -10   46.63   28.79
  -1  10  10   -9.07   23.99
   0  10  10  -18.69   18.42
   1  10  10  166.30   29.40
   2  10  10   53.19   26.52
   3  10  10    0.19   19.26
   3  10  10    8.63   21.35
   4  10  10   16.68   23.89
   4  10  10   32.60   26.97
   5  10  10   -8.92   26.87
   5  10  10    2.88   23.21
   6  10  10   33.86   30.84
   6  10  10   48.14   34.82
   7  10  10  -26.18   33.52
   8  10  10   50.76   42.75
   9  10  10  -25.92   36.91
   9 -11 -10   91.41   47.35
   8 -11 -10  104.35   46.44
  -7  11  10    0.04   41.47
   7 -11 -10   90.59   40.55
   6 -11 -10   19.73   29.60
  -6  11  10   -3.75   36.76
  -4  11  10  221.98   56.72
   4 -11 -10  333.89   48.79
  -3  11  10  -15.55   30.99
   3 -11 -10   35.05   28.09
  -2  11  10  193.56   40.16
   2 -11 -10  177.05   35.31
  -1  11  10   48.24   30.58
   1 -11 -10   65.60   31.96
   1  11  10   40.53   22.82
   2  11  10  497.43   51.56
   3  11  10   14.51   23.59
   4  11  10   27.34   27.13
   5  11  10  -33.03   24.22
   5  11  10    0.29   30.79
   6  11  10   54.52   34.24
   6  11  10   69.87   32.49
   7  11  10  -26.95   34.45
   8  11  10  -25.93   39.25
   9  11  10  -40.25   42.88
   8 -12 -10   66.73   45.15
   7 -12 -10   44.64   36.18
   6 -12 -10  101.98   40.84
  -6  12  10   -6.29   35.86
   5 -12 -10  102.29   37.33
  -5  12  10   54.03   41.52
  -4  12  10   46.66   41.88
  -3  12  10  253.59   52.34
   3 -12 -10  340.97   50.18
  -2  12  10   20.82   34.12
   2 -12 -10   32.30   30.56
   1 -12 -10  121.20   39.43
  -1  12  10  129.56   41.22
   0  12  10    6.29   22.83
   1  12  10  288.42   40.36
   2  12  10   66.93   26.42
   3  12  10  112.45   34.13
   4  12  10   12.41   30.15
   5  12  10    1.70   32.39
   6  12  10   -9.15   31.76
   7  12  10  -24.64   29.33
   8  12  10  -12.96   39.71
   8 -13 -10   82.27   48.83
   7 -13 -10   68.88   44.53
   6 -13 -10   48.76   39.06
  -6  13  10  -23.87   43.76
  -5  13  10   82.80   45.35
  -4  13  10   55.70   44.50
   4 -13 -10  155.60   38.68
   3 -13 -10   75.76   35.81
  -3  13  10    9.83   38.80
   2 -13 -10   57.61   33.31
  -2  13  10  -17.23   34.16
  -1  13  10   -3.64   25.70
   1 -13 -10  -11.40   28.61
   1  13  10  -25.80   26.15
   2  13  10   18.36   27.09
   3  13  10  123.73   37.06
   4  13  10   29.86   32.25
   5  13  10  -45.43   30.11
   6  13  10   -7.95   34.81
   7  13  10   60.43   42.62
   7 -14 -10   91.41   49.42
  -6  14  10   -2.71   47.62
   6 -14 -10   53.80   42.81
  -5  14  10   -1.20   40.36
   5 -14 -10  113.41   47.04
   4 -14 -10  132.65   44.86
  -4  14  10   41.24   45.81
  -3  14  10   53.18   44.06
  -2  14  10   -1.99   36.44
   2 -14 -10   44.60   34.61
   1 -14 -10  113.40   37.07
  -1  14  10   58.63   37.97
   0  14  10  -39.48   26.52
   0 -14 -10   24.68   32.08
   1  14  10   43.54   30.12
   2  14  10   59.07   34.28
   3  14  10   42.88   28.66
   4  14  10   -9.63   29.16
   5  14  10   17.70   37.82
   6  14  10   19.29   40.79
   7  14  10    1.07   38.48
   7 -15 -10  150.52   56.15
   6 -15 -10   72.52   46.64
  -4  15  10   63.59   46.93
   4 -15 -10  168.56   50.50
  -3  15  10   -5.60   39.99
   3 -15 -10   82.66   36.59
  -2  15  10  164.23   52.44
   2 -15 -10  172.66   40.87
  -1  15  10  -34.78   32.93
   1 -15 -10   52.78   35.21
   0  15  10   70.77   39.90
   1  15  10  -39.97   27.02
   2  15  10  139.64   40.72
   3  15  10    0.28   30.89
   4  15  10   17.69   36.50
   5  15  10  -21.41   36.55
   6  15  10    5.09   45.41
   7  15  10  -35.24   44.53
   6 -16 -10  147.29   57.32
  -5  16  10  -29.12   46.05
   5 -16 -10   68.19   47.75
   4 -16 -10   66.53   44.98
  -4  16  10  -11.99   45.85
   3 -16 -10  126.20   45.80
  -3  16  10   37.36   46.45
   2 -16 -10   75.22   40.14
  -2  16  10   44.03   43.99
   0  16  10  -30.69   31.80
   1  16  10   31.69   35.41
   2  16  10   -3.02   31.68
   3  16  10   28.96   37.19
   4  16  10   25.20   36.71
   5  16  10  -15.25   38.65
   6  16  10  -13.20   39.15
   6 -17 -10  123.31   52.72
   5 -17 -10   74.91   49.28
  -5  17  10  -46.21   55.04
  -4  17  10   60.37   56.68
   4 -17 -10   38.10   38.90
   3 -17 -10   88.86   46.06
  -3  17  10  -36.10   46.13
  -2  17  10   34.23   50.46
  -1  17  10  -11.41   38.95
   0  17  10   20.54   39.96
   1  17  10   -0.76   34.39
   2  17  10  -17.74   34.88
   3  17  10  -49.28   34.00
   4  17  10   46.00   42.54
   5  17  10   -3.20   40.46
   5 -18 -10  116.95   56.66
  -4  18  10  -71.51   47.17
   4 -18 -10   57.01   48.06
  -3  18  10  -20.00   53.63
   3 -18 -10   34.29   39.01
  -2  18  10   13.41   51.78
  -1  18  10   96.96   53.44
   0  18  10  -50.76   35.73
   1  18  10    1.53   39.08
   2  18  10  -34.81   38.95
   3  18  10   67.24   44.12
   4  18  10  -36.84   39.87
   5  18  10    6.66   43.40
   4 -19 -10   39.38   45.14
  -4  19  10  -57.88   56.12
  -3  19  10  -70.95   51.39
   3 -19 -10   68.16   48.21
  -2  19  10  -22.34   49.17
  -1  19  10  -32.36   45.10
   0  19  10   10.44   44.54
   1  19  10  -44.11   41.34
   2  19  10  -32.01   41.00
   3  19  10  -45.80   39.23
  -2  20  10  -72.36   53.92
  -1  20  10    6.43   49.86
   0  20  10  -13.72   47.59
  -3 -19  11  -17.46   14.26
   2 -19  11   -3.95   17.56
   3 -19  11   -8.09   19.87
  -4 -18  11   -0.77   14.13
  -3 -18  11  -23.75   13.61
   2 -18  11    1.00   17.91
   3 -18  11  -14.54   19.71
   4 -18  11    9.81   27.08
  -5 -17  11   -2.33   14.55
  -4 -17  11   25.77   17.03
  -3 -17  11   -0.95   13.90
  -2 -17  11   57.73   19.50
   4 -17  11   11.89   24.98
   5 -17  11   -7.69   29.44
  -6 -16  11    2.22   15.27
  -5 -16  11   48.63   19.50
  -4 -16  11    2.88   14.61
  -3 -16  11   -0.01   15.38
  -2 -16  11    5.14   16.72
   5 -16  11   14.99   30.40
  -7 -15  11   -6.83   16.02
  -6 -15  11    7.19   18.59
  -5 -15  11   -8.47   15.81
  -4 -15  11   -6.48   15.53
  -3 -15  11   -2.14   14.36
  -2 -15  11    2.57   14.84
   1 -15  11   -7.88   36.76
   2 -15  11   -6.02   25.49
   5 -15  11   13.39   24.05
   6 -15  11   -9.17   27.94
  -7 -14  11   44.61   22.45
  -6 -14  11   -2.47   18.51
  -5 -14  11   -6.14   14.27
  -4 -14  11   -5.32   15.06
  -3 -14  11  130.82   22.11
  -2 -14  11   11.28   15.70
  -1 -14  11   -5.22   13.28
   1 -14  11   70.34   33.87
   2 -14  11   -1.07   24.42
   3 -14  11   -1.20   21.97
   6 -14  11   15.53   29.48
   7 -14  11  -10.74   25.80
  -8 -13  11   85.68   29.48
  -7 -13  11   11.81   21.13
  -6 -13  11    6.25   20.23
  -5 -13  11  -10.36   13.67
  -4 -13  11  115.38   21.66
  -3 -13  11   -5.01   14.86
  -2 -13  11   80.74   20.72
  -1 -13  11   -7.09   15.50
   1 -13  11  -34.52   23.24
   2 -13  11  104.75   30.83
   3 -13  11   14.71   23.42
   4 -13  11    2.20   21.38
   7 -13  11    5.36   28.20
  -8 -12  11   32.14   25.07
  -7 -12  11   49.89   23.27
  -6 -12  11   -9.11   18.53
  -5 -12  11  -15.48   18.13
  -4 -12  11   -7.63   16.42
  -3 -12  11  128.15   22.26
  -2 -12  11  102.37   21.60
  -1 -12  11   45.64   17.41
   1 -12  11   99.64   32.17
   2 -12  11   26.07   20.26
   3 -12  11   -0.35   21.44
   4 -12  11  152.79   34.19
   5 -12  11   -6.68   20.21
   6 -12  11   45.18   25.56
   7 -12  11   10.69   27.32
   8 -12  11   44.91   33.26
  -8 -11  11   26.55   22.83
  -7 -11  11   -8.25   20.41
  -6 -11  11   19.51   21.16
  -5 -11  11   16.28   21.08
  -4 -11  11   72.69   22.45
  -3 -11  11  -14.07   16.20
  -2 -11  11   -8.95   13.53
  -1 -11  11   25.02   15.80
   0 -11  11  -19.38   13.56
   1 -11  11  -23.35   19.76
   2 -11  11   36.20   21.91
   3 -11  11  123.60   31.50
   4 -11  11   63.93   27.80
   5 -11  11   10.93   20.74
   6 -11  11   22.97   27.98
   7 -11  11    3.64   26.28
   8 -11  11  -15.61   25.43
  -9 -10  11   49.97   29.89
  -8 -10  11   10.11   24.10
  -7 -10  11   68.57   26.13
  -6 -10  11    1.57   21.23
  -5 -10  11  141.50   25.92
  -4 -10  11  -13.08   17.23
  -3 -10  11  240.05   29.16
  -2 -10  11   -3.65   14.78
  -1 -10  11  195.70   24.52
   0 -10  11   -7.83   12.01
   1 -10  11  199.17   29.84
   2 -10  11   50.79   22.09
   3 -10  11  117.27   31.41
   4 -10  11   16.97   21.17
   5 -10  11   72.34   29.97
   6 -10  11    5.43   25.99
   7 -10  11   20.72   29.39
   8 -10  11   -9.36   24.46
   8 -10  11   33.08   31.83
   9 -10  11  -14.21   27.85
  -9  -9  11   15.22   24.07
  -8  -9  11   68.63   27.76
  -7  -9  11   22.78   22.85
  -6  -9  11    8.28   19.90
  -5  -9  11    8.21   19.82
  -4  -9  11   72.28   21.89
  -3  -9  11   17.61   17.26
  -2  -9  11  100.98   20.79
  -1  -9  11   71.33   18.90
   0  -9  11   69.31   18.49
   1  -9  11  182.16   27.84
   2  -9  11  127.89   30.39
   3  -9  11   28.35   21.69
   4  -9  11  -15.22   20.78
   5  -9  11  218.36   33.24
   6  -9  11   16.94   28.28
   7  -9  11   72.67   33.81
   8  -9  11   -1.16   25.07
   8  -9  11    0.54   28.69
   9  -9  11   45.48   33.47
   9  -9  11    9.39   29.44
  -9  -8  11   26.66   25.07
  -8  -8  11   36.94   23.71
  -7  -8  11    1.06   20.24
  -6  -8  11   45.93   22.73
  -5  -8  11  125.90   24.84
  -4  -8  11   -5.24   14.13
  -3  -8  11  -14.91   12.78
  -2  -8  11  -14.66   12.50
  -1  -8  11   28.95   14.64
   0  -8  11  103.92   20.06
   1  -8  11  -19.16   10.87
   1  -8  11   -4.14   14.19
   2  -8  11  100.09   25.68
   3  -8  11    1.29   18.87
   4  -8  11  192.52   38.47
   5  -8  11    2.64   20.51
   6  -8  11  136.31   34.39
   7  -8  11   14.82   29.70
   8  -8  11   58.69   33.58
   8  -8  11   34.22   23.65
   9  -8  11   -4.49   29.08
   9  -8  11    7.36   28.12
 -10  -7  11   65.14   29.70
  -9  -7  11    4.12   23.41
  -8  -7  11   21.36   24.41
  -7  -7  11    4.43   18.95
  -6  -7  11  311.15   36.43
  -5  -7  11   30.98   17.42
  -4  -7  11  212.92   27.95
  -2  -7  11  104.25   19.64
   0  -7  11  513.27   42.12
   1  -7  11   -1.81   10.98
   1  -7  11   17.59   17.57
   2  -7  11   23.15   19.21
   3  -7  11   40.32   22.79
   4  -7  11  171.02   30.39
   5  -7  11   52.62   25.84
   6  -7  11   15.63   23.24
   7  -7  11   57.26   32.31
   8  -7  11    0.09   23.41
   9  -7  11   56.62   34.99
   9  -7  11   28.54   30.71
 -10  -6  11   43.88   29.76
  -9  -6  11   15.47   23.45
  -8  -6  11  -20.46   20.52
  -7  -6  11   68.60   24.66
  -6  -6  11   21.42   20.52
  -5  -6  11  503.15   46.94
  -4  -6  11   -0.41   15.87
  -2  -6  11  -13.25   14.72
  -1  -6  11  412.27   36.64
   0  -6  11  130.18   18.66
   1  -6  11   12.22   11.16
   1  -6  11   35.69   17.92
   2  -6  11  -20.58   13.47
   3  -6  11   58.83   24.15
   4  -6  11   78.83   26.32
   5  -6  11  196.18   40.06
   6  -6  11  109.15   33.45
   7  -6  11  -11.57   24.91
   8  -6  11   17.80   24.39
   9  -6  11   -1.19   26.41
   9  -6  11   10.85   30.77
  10  -6  11   28.24   29.11
 -10  -5  11   25.52   26.92
  -9  -5  11   19.12   23.97
  -8  -5  11   -5.94   20.32
  -7  -5  11   12.41   17.13
  -6  -5  11  121.89   28.10
  -5  -5  11  113.96   21.63
  -4  -5  11    6.29   16.15
  -3  -5  11   -3.76   13.62
  -1  -5  11   63.78   17.97
   0  -5  11  -17.18    9.96
   1  -5  11  388.40   31.72
   1  -5  11  383.39   35.63
   2  -5  11   27.83   17.54
   3  -5  11  120.97   28.53
   4  -5  11   22.60   22.73
   5  -5  11  331.36   40.10
   6  -5  11    8.05   21.17
   7  -5  11  139.33   34.81
   8  -5  11   -4.54   20.81
   9  -5  11   80.32   30.95
  10  -5  11   -1.31   27.59
 -10  -4  11   49.35   29.87
  -9  -4  11   47.95   27.42
  -8  -4  11   23.46   22.32
  -7  -4  11   53.73   21.49
  -6  -4  11  131.03   30.00
  -5  -4  11  140.35   25.34
  -4  -4  11   87.05   20.98
  -3  -4  11  417.10   38.98
  -2  -4  11   92.56   23.74
  -1  -4  11  121.82   18.95
   0  -4  11  193.79   22.40
   1  -4  11  308.71   32.70
   1  -4  11  410.65   31.44
   2  -4  11   11.85   19.95
   2  -4  11    2.93   13.41
   3  -4  11  105.39   26.91
   4  -4  11   11.37   16.68
   5  -4  11   26.69   20.99
   6  -4  11   77.46   27.07
   7  -4  11   -1.42   21.01
   8  -4  11   17.78   27.84
   9  -4  11   10.01   29.36
  10  -4  11   36.69   30.21
 -10  -3  11   44.23   27.49
  -9  -3  11   27.99   25.37
  -8  -3  11   77.37   25.48
  -7  -3  11  -18.51   18.43
  -6  -3  11  216.02   29.15
  -5  -3  11  -20.79   16.52
  -4  -3  11  149.78   22.82
  -3  -3  11  -22.43   13.49
  -2  -3  11  532.81   45.98
   0  -3  11  640.45   49.23
   1  -3  11  192.14   24.56
   1  -3  11  232.18   22.70
   2  -3  11  423.75   39.72
   3  -3  11   60.29   21.77
   4  -3  11   62.57   21.81
   5  -3  11   -2.47   16.81
   6  -3  11   10.46   20.69
   7  -3  11   38.33   25.34
   8  -3  11    8.64   22.49
   9  -3  11   27.67   29.30
  10  -3  11   -6.05   25.30
 -10  -2  11   59.24   29.54
  -9  -2  11   37.26   26.70
  -8  -2  11   22.13   22.50
  -7  -2  11   -6.54   19.22
  -6  -2  11   -8.34   17.90
  -5  -2  11   -5.31   17.01
  -4  -2  11  -20.92   15.60
  -3  -2  11  -20.14   14.71
  -2  -2  11  186.50   24.42
  -1  -2  11  120.66   18.81
   0  -2  11    5.79   11.13
   0  -2  11    0.45   13.29
   1  -2  11   33.97   14.79
   1  -2  11   47.08   17.39
   2  -2  11  425.59   39.04
   2  -2  11  399.16   36.65
   3  -2  11   40.42   19.21
   4  -2  11  181.36   27.85
   5  -2  11   -8.52   17.37
   6  -2  11  243.60   33.09
   7  -2  11   15.65   24.14
   8  -2  11  198.19   33.85
   9  -2  11    6.66   23.51
  10  -2  11   44.92   29.59
 -10  -1  11   29.62   30.33
  -9  -1  11  103.50   32.29
  -8  -1  11   38.55   25.09
  -7  -1  11   -3.20   20.32
  -6  -1  11   32.66   21.91
  -5  -1  11    6.55   17.49
  -4  -1  11  142.16   22.15
  -3  -1  11  -17.09   14.83
  -2  -1  11   90.27   20.99
  -1  -1  11  -12.82   11.85
   0  -1  11   -9.20   10.97
   1  -1  11   -5.56   11.07
   1  -1  11   -5.49   14.40
   2  -1  11  465.32   40.57
   2  -1  11  443.85   40.15
   3  -1  11  307.62   33.50
   4  -1  11  -13.87   13.17
   5  -1  11  101.34   26.30
   6  -1  11   57.61   23.74
   7  -1  11  170.12   36.59
   8  -1  11   36.18   23.79
   9  -1  11   52.66   31.26
  10  -1  11  -11.42   27.96
 -10   0  11   22.39   31.40
  -9   0  11   84.50   31.54
  -8   0  11  -13.71   21.23
  -7   0  11  120.77   25.86
  -6   0  11  -20.63   16.79
  -5   0  11  189.38   25.80
  -4   0  11   -5.36   12.90
  -3   0  11  555.99   47.82
  -1   0  11   41.55   16.49
   0   0  11  -11.70   12.60
   0   0  11   -6.92   11.05
   1   0  11  554.04   46.62
   1   0  11  516.26   42.43
   2   0  11   14.66   13.81
   2   0  11   10.70   16.85
   3   0  11  138.99   20.29
   3   0  11  132.02   21.53
   4   0  11  -10.37   12.92
   5   0  11  -14.84   17.19
   6   0  11   24.02   23.63
   7   0  11   51.50   26.86
   8   0  11   23.51   22.55
   9   0  11  -15.38   19.80
  10   0  11    5.56   24.91
 -10   1  11   39.89   39.54
  -9   1  11   71.59   36.23
  -8   1  11   38.44   27.03
  -7   1  11   17.29   23.01
  -6   1  11   35.29   21.59
  -5   1  11   -3.74   17.09
  -4   1  11  140.02   22.37
  -3   1  11  -14.03   16.29
  -2   1  11  113.94   24.94
  -1   1  11  -18.83   14.82
   0   1  11  -19.49   13.00
   0   1  11   -7.67   10.58
   1   1  11  -25.88   16.01
   1   1  11   -6.21   12.86
   2   1  11  568.15   47.29
   2   1  11  622.54   50.72
   3   1  11  336.12   32.10
   3   1  11  306.36   32.50
   4   1  11   -9.92   15.46
   5   1  11  136.54   29.21
   6   1  11   44.37   23.86
   7   1  11  190.03   35.95
   8   1  11   13.75   22.12
   9   1  11   37.81   26.84
  10   1  11   -0.12   29.19
  -9   2  11    7.59   30.81
  -8   2  11   25.52   27.46
  -7   2  11   13.38   22.66
  -6   2  11    2.34   19.82
  -5   2  11    4.47   19.17
  -4   2  11   -9.80   17.06
  -3   2  11  -28.08   16.24
  -2   2  11  227.98   31.30
  -1   2  11  165.08   17.89
  -1   2  11  149.60   25.69
   0   2  11   -0.23   17.38
   0   2  11    6.11    9.90
   1   2  11   67.94   21.66
   1   2  11   44.77   14.92
   2   2  11  604.06   48.71
   2   2  11  511.89   44.27
   3   2  11   57.71   18.37
   3   2  11   46.55   18.06
   4   2  11  207.31   27.29
   5   2  11   -9.21   15.95
   6   2  11  269.01   34.29
   7   2  11   10.07   21.06
   8   2  11  190.05   31.76
   9   2  11   -4.73   23.71
  10   2  11   36.50   27.52
  -9   3  11   60.60   38.48
  -8   3  11   85.72   34.06
  -7   3  11    0.07   22.63
  -6   3  11  281.83   37.69
  -5   3  11  -18.19   19.66
  -4   3  11  163.41   29.69
  -2   3  11  451.78   46.88
  -1   3  11   -7.59    9.75
  -1   3  11  -30.30   18.51
   0   3  11  674.94   57.69
   0   3  11  640.71   47.62
   1   3  11  304.39   29.16
   1   3  11  294.26   33.25
   2   3  11  577.20   46.33
   2   3  11  525.06   47.43
   3   3  11   97.27   21.75
   3   3  11  102.07   24.12
   4   3  11   80.55   25.49
   4   3  11   74.64   19.70
   5   3  11    8.47   18.65
   6   3  11   -3.23   21.73
   7   3  11   49.64   28.56
   8   3  11   -1.72   25.35
   9   3  11   -6.67   24.85
  10   3  11   -5.29   25.55
  -9   4  11   34.01   38.29
  -8   4  11   22.50   34.89
   8  -4 -11   20.34   38.98
  -7   4  11   51.50   29.76
   7  -4 -11  132.87   43.66
   6  -4 -11  125.77   43.54
  -6   4  11   96.21   30.93
  -5   4  11  153.91   35.40
  -4   4  11   63.38   30.18
  -3   4  11  218.83   31.49
  -2   4  11   69.65   25.36
  -1   4  11  112.00   15.75
  -1   4  11  153.34   33.37
   0   4  11  222.93   24.00
   0   4  11  227.07   31.98
   1   4  11  482.76   40.34
   1   4  11  507.21   47.49
   2   4  11    6.22   14.65
   2   4  11   23.25   17.08
   3   4  11  108.71   22.75
   3   4  11  128.39   26.17
   4   4  11    3.88   16.69
   4   4  11  -12.30   18.76
   5   4  11    9.33   18.40
   6   4  11   49.55   27.92
   7   4  11   -0.53   19.55
   8   4  11   -2.70   22.53
   9   4  11  -12.11   25.67
  10   4  11    5.67   29.95
  -9   5  11   13.12   45.54
   9  -5 -11    4.44   40.29
  -8   5  11   -9.73   29.61
   8  -5 -11  -15.66   33.44
  -7   5  11   15.97   27.57
   7  -5 -11   17.51   33.41
   6  -5 -11  181.46   38.59
  -6   5  11   77.11   33.41
  -5   5  11   58.28   30.29
   5  -5 -11  123.70   37.38
  -4   5  11  -15.13   23.21
   4  -5 -11   -3.21   23.01
  -2   5  11  -31.82   21.68
  -2   5  11   20.44   10.82
  -1   5  11   62.07   16.06
  -1   5  11   81.07   30.41
   0   5  11   -3.94   20.23
   0   5  11    5.43   11.96
   1   5  11  542.24   49.71
   1   5  11  521.53   43.62
   2   5  11   50.96   19.68
   2   5  11   54.57   20.74
   3   5  11  129.71   24.82
   3   5  11  158.75   31.22
   4   5  11   32.88   21.10
   4   5  11   33.05   22.76
   5   5  11  405.22   43.20
   6   5  11  -20.88   22.57
   7   5  11  147.15   35.92
   8   5  11    2.73   25.14
   9   5  11  112.95   37.47
  10   5  11   -7.86   29.01
   9  -6 -11   24.05   41.83
  -8   6  11   -3.98   33.50
   8  -6 -11   19.84   35.47
   7  -6 -11   70.28   34.80
  -7   6  11   28.60   32.52
  -6   6  11    9.31   29.67
   6  -6 -11   59.49   30.88
   5  -6 -11  430.04   53.94
  -5   6  11  273.02   44.13
  -4   6  11  -21.11   23.89
   4  -6 -11   13.71   28.89
  -2   6  11   -6.18   26.68
  -1   6  11  474.05   51.69
   0   6  11  172.84   22.13
   0   6  11  179.43   30.82
   1   6  11    9.41   17.49
   1   6  11   24.12   21.43
   2   6  11   -6.53   16.35
   2   6  11   -9.59   13.92
   3   6  11  138.55   30.74
   3   6  11  113.51   27.42
   4   6  11   77.80   26.72
   4   6  11   77.61   26.62
   5   6  11  143.76   28.53
   5   6  11  172.70   32.29
   6   6  11  110.84   33.24
   7   6  11   -6.91   24.20
   8   6  11   17.30   28.95
   9   6  11    1.69   34.96
  10  -7 -11  110.70   54.78
   9  -7 -11   24.70   39.16
  -8   7  11   -1.89   41.43
   8  -7 -11   40.87   38.08
  -7   7  11  -12.91   28.25
   7  -7 -11   34.65   32.66
   6  -7 -11  314.33   49.20
  -6   7  11  180.37   45.16
  -5   7  11  -32.12   26.40
   5  -7 -11   49.33   29.16
  -4   7  11   70.64   36.20
   4  -7 -11  187.52   38.61
   3  -7 -11  -14.48   24.06
  -2   7  11  140.05   38.88
  -1   7  11  -12.49   18.13
   0   7  11  482.93   40.91
   0   7  11  524.05   51.07
   1   7  11   23.81   18.45
   1   7  11    3.76   17.61
   2   7  11   57.06   25.08
   2   7  11   60.94   22.87
   3   7  11   42.32   21.26
   3   7  11   44.08   23.74
   4   7  11  237.81   34.62
   4   7  11  230.77   34.50
   5   7  11   26.79   27.92
   5   7  11   16.54   26.02
   6   7  11  -40.04   24.23
   7   7  11   36.45   31.15
   8   7  11  -40.77   29.97
   9   7  11   56.96   38.25
   9  -8 -11   14.13   37.87
  -8   8  11    8.61   37.66
   8  -8 -11   64.16   40.99
   7  -8 -11   25.31   28.95
  -7   8  11  -15.67   31.83
  -6   8  11   -3.06   30.04
   6  -8 -11   66.39   31.49
   4  -8 -11    5.84   23.96
   3  -8 -11   -1.37   25.74
  -3   8  11  -36.02   26.75
   2  -8 -11   11.66   23.91
  -2   8  11  -13.65   26.46
  -1   8  11   45.41   27.19
   0   8  11  128.82   26.12
   1   8  11  -21.64   14.46
   1   8  11  -11.30   18.65
   2   8  11  164.39   25.36
   2   8  11  137.74   26.56
   3   8  11  -29.41   18.38
   3   8  11    3.48   21.28
   4   8  11  207.92   33.19
   4   8  11  232.96   34.24
   5   8  11    7.13   24.77
   5   8  11    0.56   26.82
   6   8  11  225.19   47.99
   7   8  11  -15.97   28.16
   8   8  11   57.98   38.39
   9   8  11  -27.14   40.08
   9  -9 -11   52.51   43.65
  -8   9  11  -11.64   38.10
   8  -9 -11  113.13   46.22
  -7   9  11   -5.86   32.06
   7  -9 -11   32.38   34.19
  -6   9  11   13.65   32.94
   6  -9 -11  147.33   36.88
  -5   9  11  -17.34   31.77
   5  -9 -11   30.35   31.69
  -4   9  11   21.62   34.26
   3  -9 -11   25.03   26.75
  -3   9  11   -8.10   32.39
   2  -9 -11  147.96   36.69
  -1   9  11  112.73   35.58
   0   9  11   74.86   28.52
   1   9  11  266.91   36.11
   2   9  11  233.11   33.44
   3   9  11  124.17   31.30
   3   9  11  119.34   29.23
   4   9  11    2.73   23.39
   4   9  11  -12.32   22.68
   5   9  11  391.10   48.49
   5   9  11  383.45   47.76
   6   9  11   22.12   34.24
   7   9  11   72.97   42.24
   8   9  11  -31.30   31.79
   9   9  11   32.04   39.90
   9 -10 -11  114.82   49.99
   8 -10 -11   93.37   44.27
  -7  10  11   39.72   40.73
   7 -10 -11  125.65   40.95
  -6  10  11  -20.66   30.90
   6 -10 -11   48.68   31.18
  -5  10  11   83.84   41.72
   5 -10 -11  177.21   39.60
   4 -10 -11   23.88   31.64
  -4  10  11  -35.96   34.43
   3 -10 -11  229.31   43.19
  -3  10  11  214.75   52.92
  -2  10  11    3.01   25.12
   2 -10 -11   19.39   25.35
  -1  10  11  291.56   43.98
   0  10  11   -6.97   17.04
   1  10  11  259.17   36.80
   2  10  11  120.20   31.80
   3  10  11  155.71   30.66
   4  10  11   24.21   26.17
   4  10  11   13.90   24.01
   5  10  11   82.71   33.49
   5  10  11   71.89   34.35
   6  10  11  -16.22   31.85
   6  10  11  -27.37   25.32
   7  10  11  -17.06   36.63
   8  10  11    5.00   36.77
   9 -11 -11  108.50   48.85
   8 -11 -11   60.01   39.02
   7 -11 -11   37.29   37.73
  -7  11  11  -35.51   35.67
   6 -11 -11   58.08   38.92
  -6  11  11    2.53   35.18
  -5  11  11   25.84   38.21
   5 -11 -11   84.91   39.28
  -4  11  11   40.55   42.82
   3 -11 -11   41.64   34.13
  -3  11  11   -1.47   35.79
  -2  11  11   -6.11   27.82
  -1  11  11   30.87   30.58
   1 -11 -11   33.21   32.19
   0  11  11  -18.75   24.52
   1  11  11  -13.84   23.62
   2  11  11   77.40   30.66
   3  11  11  232.38   36.74
   4  11  11  112.53   36.58
   5  11  11    4.46   30.26
   5  11  11  -36.86   25.65
   6  11  11   -7.48   26.89
   6  11  11    6.11   35.18
   7  11  11   35.09   37.04
   8  11  11  -37.20   34.30
   8 -12 -11   52.65   46.20
   7 -12 -11   85.38   44.37
  -7  12  11   38.49   44.29
   6 -12 -11   -1.80   34.44
   5 -12 -11   82.51   36.17
  -5  12  11  -32.50   33.05
  -4  12  11   24.57   41.31
   4 -12 -11   38.38   35.04
  -3  12  11  173.23   54.36
   2 -12 -11  126.87   38.42
  -2  12  11  131.88   46.45
  -1  12  11   21.69   33.88
   0  12  11   -2.88   27.43
   1  12  11  149.33   39.02
   2  12  11   87.25   33.95
   3  12  11    8.97   25.19
   4  12  11  187.10   42.10
   5  12  11  -34.09   29.96
   6  12  11   55.50   38.18
   8  12  11   40.58   47.66
   8 -13 -11  162.15   56.43
   7 -13 -11   60.99   45.30
  -6  13  11  -29.03   43.93
   6 -13 -11   22.81   39.56
  -4  13  11  142.73   54.29
   4 -13 -11  197.27   43.01
  -3  13  11   -1.52   41.69
   3 -13 -11   91.32   41.19
   2 -13 -11  129.37   43.11
  -2  13  11  104.90   46.84
   1 -13 -11   25.45   31.66
  -1  13  11   -2.85   32.79
   0  13  11   32.19   33.53
   1  13  11  -27.05   24.65
   2  13  11  184.57   41.57
   3  13  11   29.39   29.04
   4  13  11  -11.37   27.98
   5  13  11  -27.95   32.18
   6  13  11   23.43   38.71
   7 -14 -11  162.94   57.33
  -6  14  11  -30.48   46.22
   6 -14 -11   25.30   40.85
  -5  14  11  -13.65   42.33
   5 -14 -11  120.45   47.98
  -4  14  11   -9.17   41.04
   4 -14 -11  120.84   44.91
  -3  14  11  128.21   52.00
   3 -14 -11  259.39   46.78
   2 -14 -11   40.26   32.22
  -2  14  11    2.17   37.88
   1 -14 -11   79.94   36.66
  -1  14  11  -36.12   31.05
   0  14  11  -16.29   31.83
   1  14  11  113.27   39.90
   2  14  11   10.27   29.84
   3  14  11    5.31   30.76
   4  14  11   25.44   35.20
   5  14  11  -39.74   34.17
   6  14  11   52.78   46.76
  -6  15  11   -2.52   45.78
   6 -15 -11   88.75   49.04
   5 -15 -11   45.97   45.20
  -5  15  11  -34.84   45.36
  -4  15  11    3.44   44.48
   3 -15 -11   11.58   37.37
  -3  15  11  -22.56   41.47
  -1  15  11   -9.71   35.39
   1 -15 -11   36.80   35.14
   0  15  11  -39.21   32.35
   1  15  11   -2.10   31.94
   2  15  11   16.97   30.30
   3  15  11   52.11   37.26
   4  15  11   18.16   34.21
   5  15  11   11.12   38.51
   6  15  11  -46.97   35.63
   7  15  11    9.33   49.27
   6 -16 -11  111.78   54.84
   5 -16 -11  173.75   57.85
  -5  16  11   14.96   54.70
  -4  16  11  -38.30   45.38
   4 -16 -11   29.82   43.96
  -3  16  11    0.61   44.84
   3 -16 -11  158.08   50.79
   2 -16 -11  110.22   44.05
  -2  16  11   -9.80   42.04
   1 -16 -11  178.03   41.03
  -1  16  11  116.42   52.85
   0  16  11  -39.33   34.79
   1  16  11  -36.45   31.22
   2  16  11    0.79   28.37
   3  16  11   -3.52   35.39
   4  16  11   39.45   41.01
   5  16  11   -2.30   37.78
   6  16  11  -17.25   41.63
  -5  17  11  -45.90   47.78
   5 -17 -11   62.21   45.56
   4 -17 -11   88.23   45.33
  -4  17  11    2.61   51.42
   3 -17 -11   51.57   46.01
  -3  17  11  -65.95   45.02
   2 -17 -11  149.79   46.83
  -2  17  11   18.34   50.25
  -1  17  11  -44.87   44.77
   0  17  11    7.47   42.71
   1  17  11  -25.17   37.22
   2  17  11  -34.42   35.01
   3  17  11  -47.48   34.09
   4  17  11  -12.63   37.69
   5  17  11    6.32   42.98
  -5  18  11  -41.58   58.16
   4 -18 -11   47.50   48.93
  -4  18  11  -47.22   57.42
   3 -18 -11   76.75   45.83
  -2  18  11  -57.12   48.47
  -1  18  11   -4.90   48.70
   0  18  11   11.37   45.59
   1  18  11  -33.38   37.25
   2  18  11  -10.71   39.94
   3  18  11  -33.07   37.89
   4  18  11  -15.60   42.92
   3 -19 -11   66.78   50.90
  -3  19  11  -40.00   57.67
  -2  19  11  -34.60   50.15
  -1  19  11  -53.10   46.48
   0  19  11   24.04   51.09
   1  19  11   -9.10   44.25
   2  19  11  -65.31   38.98
   2 -19  12   -4.81   17.06
  -4 -18  12   -3.79   14.27
  -3 -18  12   -6.72   15.63
   3 -18  12  -16.63   20.66
   4 -18  12  -18.50   24.63
  -5 -17  12   11.89   15.58
  -4 -17  12    4.53   16.14
  -3 -17  12    3.17   14.95
   4 -17  12    6.25   26.73
  -6 -16  12   -9.96   17.58
  -5 -16  12   -6.68   16.28
  -4 -16  12   31.76   18.32
  -3 -16  12   32.85   18.64
  -2 -16  12   10.37   16.21
   1 -16  12   -2.34   55.50
   5 -16  12    0.92   29.55
  -6 -15  12   32.55   20.60
  -5 -15  12    3.01   16.18
  -4 -15  12   50.90   20.47
  -3 -15  12   -0.72   17.72
  -2 -15  12   71.00   22.12
   1 -15  12   -2.25   42.79
   2 -15  12  -15.84   26.27
   6 -15  12   -2.35   30.16
  -7 -14  12   20.97   22.33
  -6 -14  12   34.02   21.55
  -5 -14  12    4.66   18.32
  -4 -14  12   -7.90   16.56
  -3 -14  12   22.58   16.76
  -2 -14  12  104.29   24.89
   1 -14  12  -21.04   32.74
   2 -14  12   48.36   29.71
   3 -14  12  -15.77   22.17
  -7 -13  12   28.52   22.68
  -6 -13  12   14.02   19.42
  -4 -13  12   -6.81   16.47
  -3 -13  12   -2.57   15.03
  -2 -13  12    7.10   15.40
  -1 -13  12  100.68   23.56
   1 -13  12  -14.93   23.68
   2 -13  12   -2.50   22.98
   3 -13  12   94.85   31.49
   4 -13  12   -0.89   19.85
   5 -13  12   48.13   25.68
   7 -13  12   53.37   33.96
  -8 -12  12    4.10   21.75
  -7 -12  12  115.07   30.27
  -6 -12  12    4.34   17.64
  -5 -12  12  -18.21   17.37
  -4 -12  12  -13.81   16.19
  -3 -12  12  177.30   26.16
  -2 -12  12   29.65   17.44
  -1 -12  12    0.99   14.23
   1 -12  12   29.61   28.38
   2 -12  12   36.08   25.52
   3 -12  12   34.04   25.09
   4 -12  12   71.72   26.98
   5 -12  12   -6.94   21.68
   6 -12  12   -5.05   22.02
   8 -12  12   26.39   27.74
  -8 -11  12  113.35   32.28
  -7 -11  12   15.07   21.88
  -6 -11  12   15.84   21.37
  -5 -11  12  -18.50   18.68
  -4 -11  12  103.36   20.75
  -3 -11  12   13.45   18.53
  -2 -11  12  146.61   23.70
  -1 -11  12   60.09   19.37
   1 -11  12   -9.73   22.34
   2 -11  12   68.28   27.95
   3 -11  12   -7.71   21.05
   4 -11  12   -6.20   19.84
   5 -11  12   63.45   29.14
   6 -11  12   10.86   29.24
   7 -11  12   20.21   30.54
   8 -11  12   -3.87   26.96
  -9 -10  12    7.59   27.02
  -8 -10  12   -0.42   22.95
  -7 -10  12   32.98   24.13
  -6 -10  12   -0.45   17.47
  -5 -10  12  -20.49   18.26
  -4 -10  12   13.41   19.91
  -3 -10  12   40.24   19.49
  -2 -10  12  198.52   26.26
  -1 -10  12  -16.75   16.18
   0 -10  12  158.00   21.87
   1 -10  12    6.93   22.58
   2 -10  12  111.39   30.39
   3 -10  12  -14.47   20.14
   4 -10  12  174.77   37.93
   5 -10  12   34.17   25.18
   6 -10  12  113.75   37.31
   7 -10  12   -3.69   24.88
   8 -10  12   38.24   28.66
   8 -10  12   53.81   27.62
  -9  -9  12   22.14   26.07
  -8  -9  12   19.43   25.87
  -7  -9  12   -9.42   17.66
  -6  -9  12  125.39   25.93
  -5  -9  12  -14.01   18.40
  -4  -9  12  256.08   31.93
  -3  -9  12   80.01   22.91
  -2  -9  12   99.62   24.44
  -1  -9  12   87.64   20.95
   0  -9  12   90.08   18.99
   1  -9  12   41.63   23.80
   2  -9  12  -16.78   16.30
   3  -9  12  144.90   31.68
   4  -9  12   -5.83   18.80
   5  -9  12   24.18   26.34
   6  -9  12   20.49   30.60
   7  -9  12   29.16   31.70
   8  -9  12   16.80   33.26
   9  -9  12    9.39   28.21
   9  -9  12    5.69   28.00
  -9  -8  12   47.34   28.16
  -8  -8  12    4.64   23.24
  -7  -8  12   59.17   23.60
  -6  -8  12   36.62   20.30
  -5  -8  12  185.29   29.32
  -4  -8  12    3.35   17.63
  -3  -8  12  119.36   22.26
  -2  -8  12    8.03   14.94
  -1  -8  12  137.73   22.32
   0  -8  12   20.20   14.33
   1  -8  12   49.28   20.80
   2  -8  12  -18.02   18.03
   3  -8  12  -15.69   17.11
   4  -8  12  -14.73   17.75
   5  -8  12    6.79   21.34
   6  -8  12   39.60   28.60
   7  -8  12   11.67   30.53
   8  -8  12    0.14   26.37
   9  -8  12    3.36   25.92
   9  -8  12   -1.21   31.65
  -9  -7  12   31.59   25.34
  -8  -7  12   21.53   24.50
  -7  -7  12  -21.36   18.29
  -6  -7  12   31.86   22.97
  -5  -7  12   42.75   19.94
  -4  -7  12   -9.63   14.39
  -3  -7  12   62.93   20.65
  -2  -7  12   16.94   16.25
  -1  -7  12   82.05   19.41
   0  -7  12  -23.29   14.77
   1  -7  12  697.79   56.28
   1  -7  12  686.86   52.50
   2  -7  12   -4.52   20.90
   3  -7  12  122.56   30.98
   4  -7  12  -19.14   17.61
   5  -7  12  378.28   45.60
   6  -7  12   10.70   23.49
   7  -7  12  104.65   33.98
   8  -7  12   10.55   28.06
   9  -7  12   33.41   29.25
   9  -7  12   25.11   29.41
 -10  -6  12   26.94   26.87
  -9  -6  12   32.76   26.06
  -8  -6  12  -14.45   20.93
  -7  -6  12  -16.69   19.14
  -6  -6  12   -7.86   15.97
  -5  -6  12   87.23   25.25
  -4  -6  12  144.51   23.36
  -3  -6  12   -1.08   15.31
  -2  -6  12   -9.00   15.00
  -1  -6  12   61.80   18.57
   0  -6  12  156.40   20.74
   1  -6  12   53.51   15.43
   1  -6  12   93.75   24.71
   2  -6  12   86.11   28.94
   3  -6  12   -5.38   19.26
   4  -6  12   58.92   26.44
   5  -6  12   44.03   29.36
   6  -6  12  156.66   36.78
   7  -6  12    0.25   28.47
   8  -6  12   43.67   30.12
   9  -6  12    1.71   26.53
 -10  -5  12   94.37   31.77
  -9  -5  12   19.62   24.70
  -8  -5  12   42.26   25.92
  -7  -5  12   -9.76   19.53
  -6  -5  12  269.90   34.82
  -5  -5  12   20.95   21.33
  -4  -5  12  104.87   25.13
  -3  -5  12  131.21   23.34
  -2  -5  12   46.84   21.61
  -1  -5  12  -19.56   14.34
   0  -5  12  479.78   40.29
   1  -5  12   72.85   16.51
   1  -5  12   76.49   21.34
   2  -5  12    4.76   19.16
   3  -5  12  -13.68   16.44
   4  -5  12   59.33   26.61
   5  -5  12   32.03   25.41
   6  -5  12    4.18   25.84
   7  -5  12   23.70   29.61
   8  -5  12  -13.44   23.62
   9  -5  12    4.28   27.17
  10  -5  12   35.99   36.98
 -10  -4  12   42.37   28.04
  -9  -4  12   40.26   25.95
  -8  -4  12    5.41   21.67
  -7  -4  12    0.64   20.23
  -6  -4  12   24.83   19.06
  -5  -4  12  193.15   27.47
  -4  -4  12   -6.27   13.50
  -3  -4  12   55.68   21.25
  -2  -4  12  121.28   21.83
  -1  -4  12  266.19   28.50
   0  -4  12  216.66   23.37
   1  -4  12   35.23   17.81
   1  -4  12   29.17   14.23
   2  -4  12  267.95   32.01
   3  -4  12    0.76   23.29
   4  -4  12  296.10   37.44
   5  -4  12   58.73   26.78
   6  -4  12  154.08   35.72
   7  -4  12   22.58   25.37
   8  -4  12   42.13   27.13
   9  -4  12    1.13   24.07
  10  -4  12   34.37   34.77
 -10  -3  12   15.89   26.87
  -9  -3  12   22.68   27.38
  -8  -3  12   24.61   20.37
  -7  -3  12   30.15   22.81
  -6  -3  12    8.24   22.00
  -5  -3  12   14.76   21.74
  -4  -3  12   -0.66   18.79
  -3  -3  12   87.52   22.64
  -2  -3  12   89.14   22.38
  -1  -3  12  319.64   31.49
   0  -3  12  104.69   20.84
   0  -3  12   84.92   17.46
   1  -3  12  408.03   38.20
   1  -3  12  443.85   37.21
   2  -3  12  147.02   21.86
   2  -3  12  163.21   25.40
   3  -3  12  461.79   45.74
   4  -3  12   99.85   30.20
   5  -3  12  238.93   35.48
   6  -3  12   -6.20   21.69
   7  -3  12  152.95   39.25
   8  -3  12   -8.03   26.51
   9  -3  12   59.64   34.41
  10  -3  12    0.97   31.58
 -10  -2  12   20.04   26.72
  -9  -2  12   98.87   33.56
  -8  -2  12    1.33   21.13
  -7  -2  12  150.31   28.11
  -6  -2  12  -19.90   21.39
  -5  -2  12  153.81   26.95
  -4  -2  12    3.70   15.01
  -3  -2  12  522.58   46.67
  -1  -2  12   46.59   17.73
   0  -2  12   25.05   13.45
   0  -2  12    5.68   15.03
   1  -2  12  278.57   30.59
   1  -2  12  330.19   32.99
   2  -2  12  110.98   25.71
   2  -2  12   87.74   23.02
   3  -2  12   33.60   20.78
   4  -2  12  -13.36   16.26
   5  -2  12    3.13   18.61
   6  -2  12   45.96   24.51
   7  -2  12    7.82   21.76
   8  -2  12    2.08   21.63
   9  -2  12   22.97   28.40
  10  -2  12   -7.96   25.69
 -10  -1  12   44.04   30.27
  -9  -1  12   21.33   25.72
  -8  -1  12   32.53   25.62
  -7  -1  12  -13.67   20.89
  -6  -1  12   60.91   26.21
  -5  -1  12  -24.36   17.12
  -4  -1  12   99.51   21.39
  -3  -1  12  -18.18   13.69
  -2  -1  12  100.77   21.54
  -1  -1  12  137.25   21.39
   0  -1  12  -16.95   13.05
   0  -1  12  -11.96    8.93
   1  -1  12   16.18   14.85
   1  -1  12  -12.15   16.78
   2  -1  12  101.51   24.77
   2  -1  12  125.39   26.23
   3  -1  12  207.13   27.95
   4  -1  12   -1.82   17.13
   5  -1  12   30.63   22.39
   6  -1  12   -8.65   20.93
   7  -1  12   51.52   25.17
   8  -1  12   15.35   24.44
   9  -1  12   11.78   24.20
  10  -1  12    1.35   23.95
 -10   0  12   20.66   30.67
  -9   0  12   33.92   29.00
  -8   0  12    2.26   23.24
  -7   0  12  -13.08   20.58
  -6   0  12   94.06   28.41
  -5   0  12  -10.25   13.73
  -4   0  12    4.00   14.06
  -3   0  12   -1.20   15.64
  -2   0  12  551.20   49.08
  -1   0  12  -17.76   13.80
   0   0  12  439.73   39.57
   0   0  12  381.84   34.00
   1   0  12  -12.80   13.66
   2   0  12  342.29   34.10
   2   0  12  346.87   34.87
   3   0  12   -0.24   14.44
   4   0  12  349.94   37.48
   5   0  12   -9.46   19.70
   6   0  12  356.86   40.69
   7   0  12  -14.41   18.30
   8   0  12  192.23   32.69
   9   0  12   -2.72   24.14
  10   0  12   44.03   31.33
 -10   1  12   23.61   37.69
  -9   1  12   37.46   30.28
  -8   1  12   50.08   29.86
  -7   1  12    4.64   18.76
  -6   1  12   71.07   26.88
  -5   1  12    2.73   18.14
  -4   1  12  117.73   26.82
  -3   1  12   -1.98   17.38
  -2   1  12  112.46   23.92
  -1   1  12  109.09   23.23
   0   1  12  -26.54   16.19
   0   1  12   -8.64   12.28
   1   1  12   16.91   19.51
   1   1  12   10.34   13.52
   2   1  12  108.84   21.91
   2   1  12  113.64   19.59
   3   1  12  241.95   29.57
   3   1  12  264.99   29.77
   4   1  12    5.06   16.25
   5   1  12   22.69   20.77
   6   1  12   -6.62   22.27
   7   1  12   44.69   24.43
   8   1  12   22.02   27.61
   9   1  12   22.91   29.52
  10   1  12    9.67   24.57
 -10   2  12   19.71   38.62
  -9   2  12   76.47   37.25
  -8   2  12    0.45   26.19
  -7   2  12  141.22   34.16
  -6   2  12   -2.28   20.90
  -5   2  12  125.96   24.13
  -4   2  12   -5.51   20.43
  -3   2  12  491.92   48.91
  -1   2  12   13.14   23.89
  -1   2  12   56.43   15.55
   0   2  12   18.74   14.71
   0   2  12  -10.38   19.59
   1   2  12  348.50   32.81
   1   2  12  335.52   36.25
   2   2  12  154.33   23.63
   2   2  12  102.68   19.38
   3   2  12   45.03   19.95
   3   2  12   18.10   15.88
   4   2  12  -16.01   17.48
   5   2  12   -6.49   17.58
   6   2  12   20.84   21.25
   7   2  12    4.16   24.68
   8   2  12   23.82   25.35
   9   2  12   41.95   32.70
  10   2  12  -13.63   25.98
  -9   3  12  -10.94   32.74
  -8   3  12   21.89   30.35
  -7   3  12   -1.47   25.11
  -6   3  12   19.74   25.87
  -5   3  12    8.10   23.70
  -4   3  12   -3.02   23.49
  -3   3  12   13.19   25.67
  -2   3  12   85.53   25.67
  -1   3  12  226.22   32.60
  -1   3  12  295.86   25.50
   0   3  12   84.60   25.90
   0   3  12   79.53   19.45
   1   3  12  515.29   42.64
   1   3  12  510.76   48.06
   2   3  12  223.41   27.39
   2   3  12  229.07   30.03
   3   3  12  583.50   49.62
   3   3  12  535.66   47.26
   4   3  12   90.44   25.45
   5   3  12  226.95   31.41
   6   3  12    6.56   20.98
   7   3  12  120.91   32.71
   8   3  12   -9.22   23.12
   9   3  12   44.81   34.24
  10   3  12    2.23   29.43
  -9   4  12   29.66   38.58
  -8   4  12   -9.17   29.99
  -7   4  12   -4.58   26.67
  -6   4  12   31.43   24.63
  -5   4  12  201.87   34.89
  -4   4  12    1.84   24.48
  -3   4  12   36.05   26.60
  -2   4  12  152.64   35.55
  -1   4  12  216.79   22.49
  -1   4  12  234.60   35.41
   0   4  12  238.08   34.23
   0   4  12  240.23   25.43
   1   4  12   29.41   16.46
   1   4  12   49.00   25.64
   2   4  12  447.25   40.35
   2   4  12  405.95   41.51
   3   4  12   28.92   20.40
   3   4  12   40.22   19.14
   4   4  12  357.18   39.96
   4   4  12  343.41   37.43
   5   4  12   28.93   25.39
   6   4  12  171.98   30.16
   7   4  12  -15.30   21.00
   8   4  12   46.86   27.74
   9   4  12  -26.01   28.59
  -9   5  12   26.23   40.92
  -8   5  12   11.59   33.39
  -7   5  12  -14.98   27.96
   7  -5 -12  -30.70   26.15
  -6   5  12  176.52   36.63
  -5   5  12    8.23   22.98
  -4   5  12  113.37   35.07
  -3   5  12  128.95   35.64
  -2   5  12   69.87   14.72
  -2   5  12   41.63   30.52
  -1   5  12   11.50   13.02
  -1   5  12  -23.94   23.35
   0   5  12  553.24   52.95
   0   5  12  465.42   40.25
   1   5  12  101.58   24.43
   1   5  12  102.85   28.06
   2   5  12   31.53   20.01
   2   5  12   32.15   21.49
   3   5  12  -21.18   17.41
   3   5  12  -11.19   18.69
   4   5  12   26.73   24.43
   4   5  12   48.67   24.71
   5   5  12   11.88   22.04
   6   5  12    6.84   23.28
   7   5  12   40.86   31.51
   8   5  12  -34.39   25.43
   9   5  12   17.98   32.10
   9  -6 -12   56.59   47.96
  -9   6  12   27.38   43.45
   8  -6 -12    0.15   38.21
  -8   6  12    4.10   39.69
  -7   6  12  -31.14   26.36
   7  -6 -12   -6.44   28.27
  -6   6  12   -0.43   29.44
   6  -6 -12   15.71   35.17
   5  -6 -12  209.80   46.34
  -4   6  12  117.85   36.63
  -3   6  12  -14.69   26.86
  -2   6  12    9.92   26.61
  -1   6  12   69.09   16.64
  -1   6  12   40.64   26.03
   0   6  12  226.59   25.52
   0   6  12  208.10   34.42
   1   6  12  108.98   24.61
   1   6  12   97.66   29.64
   2   6  12  153.63   31.23
   2   6  12  129.78   30.30
   3   6  12  -21.56   19.69
   3   6  12  -17.84   18.19
   4   6  12   60.98   27.78
   4   6  12  101.95   28.91
   5   6  12    4.04   26.16
   6   6  12  200.61   34.23
   7   6  12    9.82   30.09
   8   6  12   21.90   28.72
   9   6  12  -19.76   27.34
   9  -7 -12   32.71   44.18
  -8   7  12  -11.46   34.37
   8  -7 -12   27.79   38.12
   7  -7 -12    3.60   34.45
  -7   7  12   -7.08   31.04
  -5   7  12   15.75   32.26
   5  -7 -12   95.00   40.98
  -4   7  12  -37.03   26.75
   4  -7 -12   39.08   33.23
  -3   7  12    4.38   30.55
  -2   7  12   18.04   23.99
  -1   7  12   96.69   34.53
   0   7  12   39.90   16.77
   0   7  12    4.99   20.67
   1   7  12  948.90   80.39
   1   7  12  996.88   71.92
   2   7  12   11.11   21.88
   2   7  12    6.97   18.98
   3   7  12  164.58   28.71
   3   7  12  156.04   29.16
   4   7  12  -11.84   23.49
   4   7  12  -15.40   22.77
   5   7  12  455.67   50.17
   5   7  12  493.35   52.40
   6   7  12  -11.53   27.97
   7   7  12  184.23   47.04
   8   7  12  -20.87   29.39
   9   7  12   66.04   45.08
   9  -8 -12   76.81   49.28
  -8   8  12  -10.61   38.32
   8  -8 -12   53.68   41.91
   7  -8 -12   94.29   39.34
  -7   8  12   -4.02   33.51
  -6   8  12   -8.78   29.38
   6  -8 -12   81.31   38.75
   5  -8 -12  235.55   41.96
  -5   8  12   75.81   41.27
   4  -8 -12   33.01   34.48
  -4   8  12  -46.11   29.09
   3  -8 -12  113.89   38.76
  -3   8  12   98.41   39.36
  -2   8  12  -31.49   20.91
  -1   8  12  196.60   42.77
   0   8  12   64.94   27.65
   1   8  12   89.91   29.29
   2   8  12  -13.55   19.23
   2   8  12   -7.49   18.16
   3   8  12  -12.35   20.66
   3   8  12  -11.46   19.97
   4   8  12  -10.98   22.76
   4   8  12  -14.26   22.32
   5   8  12  -11.42   24.02
   5   8  12    2.84   28.06
   6   8  12   47.40   31.39
   7   8  12   18.14   36.14
   8   8  12  -18.52   36.38
   9   8  12  -24.23   34.48
   9  -9 -12   71.88   48.10
  -8   9  12    0.91   39.39
   8  -9 -12   99.35   46.68
   7  -9 -12   35.53   34.12
  -7   9  12  -10.49   38.85
  -6   9  12   73.71   39.93
   6  -9 -12  151.97   37.14
  -5   9  12  -23.60   30.45
   5  -9 -12   28.68   34.40
   4  -9 -12  277.40   47.99
  -4   9  12  203.66   52.83
  -3   9  12   39.89   33.20
   3  -9 -12  136.71   45.40
  -2   9  12   59.92   37.60
  -1   9  12  133.84   39.65
   0   9  12  174.79   39.34
   1   9  12   72.96   29.14
   2   9  12   -3.86   20.11
   3   9  12  244.60   36.14
   3   9  12  235.80   33.22
   4   9  12   11.82   26.43
   4   9  12    1.62   22.57
   5   9  12   -4.08   29.76
   5   9  12    3.26   28.75
   6   9  12    5.41   33.58
   7   9  12   -3.96   38.28
   8   9  12    2.55   40.26
   9   9  12    0.81   46.55
   9 -10 -12   58.21   47.84
   8 -10 -12   65.47   45.05
   7 -10 -12   82.51   38.89
  -7  10  12  -14.63   35.08
  -6  10  12  -29.39   31.94
   6 -10 -12   19.89   32.13
  -5  10  12  -30.80   29.18
  -4  10  12  -24.47   35.36
   4 -10 -12   26.12   30.87
  -2  10  12  184.71   50.22
  -1  10  12  -13.76   27.83
   0  10  12  146.27   30.76
   1  10  12  -14.20   23.05
   2  10  12  156.52   31.83
   3  10  12   -7.90   23.41
   4  10  12  187.31   35.14
   5  10  12   27.88   34.86
   5  10  12   28.42   32.25
   6  10  12  177.40   48.47
   7  10  12  -21.05   30.87
   8  10  12   68.99   51.01
   8 -11 -12  193.06   57.65
   7 -11 -12   60.02   43.25
  -7  11  12   28.36   44.64
   6 -11 -12   64.87   40.97
  -6  11  12  -17.74   33.95
  -5  11  12  -49.50   32.67
   5 -11 -12   12.32   30.89
   4 -11 -12  191.81   43.58
  -3  11  12    8.72   31.82
   3 -11 -12   63.46   40.68
  -2  11  12   95.81   40.15
   2 -11 -12  179.48   41.91
  -1  11  12   60.78   36.35
   0  11  12  -11.04   26.95
   1  11  12   -6.49   26.13
   2  11  12  121.03   36.68
   3  11  12   26.11   28.57
   4  11  12   12.70   28.74
   5  11  12   87.87   40.41
   6  11  12  -25.52   31.27
   6  11  12  -35.48   30.80
   7  11  12    6.58   38.80
   8  11  12  -13.42   42.87
   8 -12 -12   72.26   48.92
   7 -12 -12  174.71   54.12
  -7  12  12   52.23   49.97
   6 -12 -12   34.81   40.84
  -6  12  12   10.38   39.40
  -5  12  12  -30.71   34.72
   5 -12 -12   32.16   39.33
   4 -12 -12   32.06   38.77
  -4  12  12  -23.67   35.10
  -1  12  12  -25.24   31.75
   0  12  12  -27.53   26.93
   1  12  12   21.71   28.24
   2  12  12   67.28   30.54
   3  12  12   41.66   31.75
   4  12  12  129.33   39.68
   5  12  12  -51.45   32.64
   6  12  12  -36.85   34.07
   7 -13 -12   69.15   48.10
  -7  13  12   63.61   54.10
   6 -13 -12   33.06   42.21
  -6  13  12  -12.94   40.96
   5 -13 -12   17.64   34.57
   3 -13 -12   35.99   33.95
  -3  13  12  -13.22   39.31
  -1  13  12   95.47   45.44
   0  13  12  -32.09   29.52
   1  13  12  -16.10   29.26
   2  13  12  -10.14   27.86
   3  13  12  192.44   43.89
   4  13  12  -12.05   31.98
   5  13  12   54.67   40.14
   6  13  12  -25.41   42.05
   7 -14 -12  155.42   56.20
   6 -14 -12   94.59   44.52
  -6  14  12  -24.17   47.38
  -5  14  12    7.32   45.55
   5 -14 -12  134.14   51.16
  -4  14  12  -27.18   39.93
   4 -14 -12   41.93   43.83
  -2  14  12  123.71   51.67
   2 -14 -12  144.95   49.28
  -1  14  12  -14.47   36.09
   0  14  12    4.76   35.21
   1  14  12  -41.92   29.23
   2  14  12   68.11   37.36
   3  14  12   -3.80   31.46
   4  14  12  159.49   45.58
   5  14  12  -33.80   36.85
   6  14  12   -3.01   40.14
   6 -15 -12   81.50   46.04
  -6  15  12   15.65   52.46
   5 -15 -12   65.34   47.57
  -5  15  12  -35.21   44.41
  -4  15  12   22.67   49.11
   4 -15 -12   96.89   50.07
  -3  15  12   -6.10   45.61
   3 -15 -12   26.97   43.47
   2 -15 -12   99.45   44.15
  -2  15  12   43.93   47.60
  -1  15  12  -11.02   38.23
   0  15  12  -14.83   34.69
   1  15  12  -22.47   32.04
   2  15  12  -18.88   31.22
   3  15  12   -5.92   28.16
   4  15  12  -42.29   32.31
   5  15  12  -43.17   36.85
   6  15  12  -27.98   42.29
  -6  16  12  -27.37   48.57
   5 -16 -12  158.14   57.26
  -5  16  12  -61.99   51.06
  -4  16  12  -10.12   49.92
   4 -16 -12   40.23   48.11
   3 -16 -12  125.77   51.63
  -3  16  12  -25.13   44.89
  -2  16  12  -40.64   38.58
   2 -16 -12   61.55   42.42
  -1  16  12  -18.32   42.83
   0  16  12   10.39   42.85
   1  16  12  -36.99   29.18
   2  16  12   27.63   37.04
   3  16  12  -43.75   32.16
   4  16  12    8.18   41.29
   5  16  12  -50.24   38.05
   6  16  12   28.79   47.52
   5 -17 -12   61.20   51.36
  -5  17  12   -0.06   53.01
  -4  17  12  -34.88   50.38
   4 -17 -12  107.42   52.47
   3 -17 -12   48.50   48.38
  -3  17  12  -44.90   53.99
  -1  17  12  -62.96   45.73
   0  17  12  -17.10   41.53
   1  17  12   -2.23   41.25
   2  17  12  -24.36   37.15
   3  17  12  -41.50   37.78
   4  17  12  -15.00   39.53
   5  17  12  -15.50   48.73
   4 -18 -12   63.04   51.21
  -4  18  12  -45.37   51.88
  -3  18  12  -62.77   51.84
   3 -18 -12   51.37   44.17
  -2  18  12  -56.52   50.74
  -1  18  12   38.14   54.04
   0  18  12  -56.75   43.87
   1  18  12  -32.24   42.48
   2  18  12  -50.46   35.96
  -3  19  12  -86.87   55.80
  -1  19  12  -63.39   53.94
   0  19  12  -17.13   48.94
   1  19  12   -0.14   45.74
   2  19  12  -67.93   39.90
  -3 -18  13    6.07   17.48
  -4 -17  13   18.11   19.33
  -3 -17  13   25.28   21.16
  -5 -16  13   44.80   20.28
  -4 -16  13   -8.48   16.89
  -3 -16  13    6.54   17.80
   1 -16  13  -50.37   58.76
  -6 -15  13    0.61   19.49
  -5 -15  13   14.42   19.60
  -4 -15  13    1.02   17.12
  -3 -15  13   26.73   19.86
  -2 -15  13    7.61   17.24
   1 -15  13   65.06   55.50
   2 -15  13   -0.85   33.20
  -6 -14  13   12.57   20.96
  -5 -14  13    0.90   17.76
  -4 -14  13   59.89   22.42
  -3 -14  13   57.40   21.59
  -2 -14  13   40.06   19.73
   0 -14  13   80.03  121.92
   1 -14  13  -23.45   37.21
   2 -14  13   38.66   31.76
   3 -14  13  -22.62   17.78
   4 -14  13   47.84   26.15
  -7 -13  13   21.21   24.47
  -6 -13  13   46.30   24.46
  -5 -13  13  -13.89   18.43
  -4 -13  13  -17.64   16.83
  -2 -13  13   56.70   19.39
   1 -13  13  -33.78   24.09
   2 -13  13    3.11   25.85
   3 -13  13   -0.68   24.73
   4 -13  13   21.18   27.01
   5 -13  13   -4.79   24.55
   7 -13  13  -11.99   24.16
  -8 -12  13    9.99   21.92
  -7 -12  13   56.73   25.85
  -6 -12  13  100.26   28.26
  -5 -12  13  -12.55   17.27
  -4 -12  13  -28.26   15.90
  -3 -12  13   67.19   22.44
  -2 -12  13  173.48   25.66
  -1 -12  13    9.92   17.20
   1 -12  13   -7.95   23.41
   2 -12  13   39.05   25.51
   3 -12  13   -0.50   23.58
   4 -12  13  170.86   38.29
   5 -12  13   31.86   27.15
   6 -12  13   27.24   32.15
  -8 -11  13   19.44   25.82
  -7 -11  13   49.56   25.41
  -6 -11  13   11.70   21.06
  -5 -11  13  -23.02   18.61
  -4 -11  13  -13.95   17.50
  -3 -11  13   11.53   19.52
  -2 -11  13   -3.12   16.03
  -1 -11  13  227.18   28.63
   1 -11  13   32.09   28.08
   2 -11  13   -9.12   18.57
   3 -11  13  174.30   37.99
   4 -11  13   -3.11   20.83
   5 -11  13   30.96   24.98
   6 -11  13   10.54   30.58
   7 -11  13   14.92   29.99
   8 -11  13   23.26   34.77
   8 -11  13   -6.54   23.92
  -8 -10  13   -3.34   22.50
  -7 -10  13   68.07   27.81
  -6 -10  13   52.44   24.81
  -5 -10  13   25.01   22.33
  -4 -10  13  -18.14   15.73
  -3 -10  13   93.98   25.61
  -2 -10  13   35.96   19.36
  -1 -10  13  -22.47   16.22
   1 -10  13    0.49   23.54
   2 -10  13   -9.60   18.27
   3 -10  13   -8.98   18.50
   4 -10  13   38.90   24.92
   5 -10  13   37.88   28.87
   6 -10  13    5.69   26.86
   7 -10  13   20.71   26.92
   8 -10  13   11.68   28.41
  -9  -9  13   29.61   27.17
  -8  -9  13   60.47   29.14
  -7  -9  13   -3.16   21.75
  -6  -9  13    5.40   22.43
  -5  -9  13   65.53   23.03
  -4  -9  13    2.41   17.09
  -3  -9  13  258.40   31.54
  -2  -9  13  -11.25   15.23
  -1  -9  13  264.51   30.94
[truncated: 139,464 more chars]
